# Supplementary material for: Integrative proteogenomic characterization of early esophageal cancer
Source: Research Square preprint supplement (doi:10.21203/rs.3.rs-227745/v2), 2021-10-12
Supplement: Supplementary file 1 [file 12413fb86ff50e642eb1d441.xlsx]

## Sheet: Description
Supplementary Table 3: The correlations analysis of 42 HEK293T cell samples and the identifies in ESCC progression at the protein and phosphoprotein levels, Related to Supplementary Fig. 1, 2.
Sheet	Description
3a	The correlations analysis of 42 HEK293T cell samples as quality control.
3b	At least 1 unique peptides with 1% FDR at the peptide level and FOT≥1.0E-4 (n = 9,741), NA was replaced by half of the min (FOT, 5.0E-5).
3c	The identified phosphosites of 54 samples.

## Sheet: 3a
Symbol	HEK293T_01	HEK293T_02	HEK293T_03	HEK293T_04	HEK293T_05	HEK293T_06	HEK293T_07	HEK293T_08	HEK293T_09	HEK293T_10	HEK293T_11	HEK293T_12	HEK293T_13	HEK293T_14	HEK293T_15	HEK293T_16	HEK293T_17	HEK293T_18	HEK293T_19	HEK293T_20	HEK293T_21	HEK293T_22	HEK293T_23	HEK293T_24	HEK293T_25	HEK293T_26	HEK293T_27	HEK293T_28	HEK293T_29	HEK293T_30	HEK293T_31	HEK293T_32	HEK293T_33	HEK293T_34	HEK293T_35	HEK293T_36	HEK293T_37	HEK293T_38	HEK293T_39	HEK293T_40	HEK293T_41	HEK293T_42
2020-03-01	0.680574	0.799775	0.378771	1.06263	1.40723	1.78301	0.679327	2.56196	2.63212	5.22394	0.745388	2.64865	6.11873	7.36043	4.35378	6.36518	6.13419	5.07136	5.28765	2.45349	1.71335	2.19756	2.52809	3.03587	2.2707	2.04517	2.64558	2.13815	2.36348	2.44446	1.00092	2.56077	2.08761	0.695546	2.76457	3.00669	1.74302	5.33791	0.771176	2.04107	4.44949	1.44648
2020-03-02	1.81981	1.53279	2.63597	2.25382	0.354251	0.774264	0.687763	0.53174	0.835749	0.47336	0.818156	0.609868	0.720171	0.445547	0.50892	0.336514	0.658348	0.878862	0.499191	0.915193	0.520901	0.265273	0.514418	0.705369	0.708238	1.17504	1.10549	0.633682	0.607701	0.377246	0.319731	0.451471	0.207314	0.960353	0.475496	1.55563	1.15324	0.483688	0.846461	1.18792	0.340912	1.23601
2020-03-05	1.54792	1.45691	1.38217	1.89579	2.2951	1.52849	2.96218	3.59461	4.55034	4.27183	3.81192	3.26877	6.4247	4.86094	5.41366	5.01965	5.13515	4.67755	3.64995	3.28675	2.05292	2.61569	2.97117	2.53881	1.92418	2.11453	3.76522	2.76824	2.9124	3.58257	2.35146	3.28851	2.64776	3.0329	3.77925	1.39773	1.97896	4.12426	3.9438	0.879245	5.53267	2.5777
2020-09-02	24.3798	28.3805	30.411	31.6091	16.2837	29.7749	32.7094	28.0241	34.9692	24.1454	34.4739	20.5959	11.3859	23.2238	17.2009	22.7165	23.4305	23.6176	23.81	25.3701	19.8334	38.2584	33.074	22.0927	39.0311	32.179	29.1683	27.876	29.8687	31.4457	16.2435	26.8595	25.87	33.4904	35.6962	30.5064	37.7377	24.6722	35.6666	31.3679	17.9533	38.8651
2020-09-03	0.56431	0.53306	0.599477	0.66402	1.15257	0.708277	0.908621	0.607974	0.743294	0.261211	0.961096	0.629107	0.244627	0.666723	0.370596	0.29749	0.395987	0.243369	0.278027	0.409609	0.808549	0.583904	0.612812	0.757474	0.505244	0.580394	0.733266	0.281607	0.437465	0.272486	1.18088	0.438953	0.368012	0.930316	0.888912	0.373317	1.65332	0.26691	1.1637	0.626013	0.378744	0.800554
2020-09-06	4.12292	5.18612	4.13404	4.51294	2.56138	5.44093	4.89758	6.36641	6.75569	3.3239	5.72741	2.78232	3.83936	3.25926	2.24312	3.05325	2.86999	3.07528	3.27556	4.61668	2.72801	5.39172	4.34956	4.38137	4.62643	4.1031	5.3392	4.41522	4.0998	4.23624	2.70154	4.07464	2.80465	5.01451	5.45371	5.05774	5.93533	3.58059	6.20496	4.14198	2.51297	3.88985
2020-09-07	14.4707	11.94	35.2646	29.3529	19.8782	15.0768	14.2533	18.6659	22.5342	8.19644	20.9202	13.3649	7.06065	9.80394	10.6026	11.9643	11.5104	10.2954	13.2662	18.0895	20.0046	15.8296	13.9298	13.8335	13.6175	18.0207	11.8617	14.0179	16.4256	13.8714	18.6621	21.5147	19.7108	14.5936	19.2866	32.5731	32.8151	8.49291	19.3828	37.2102	10.8357	19.1801
2020-09-08	3.54788	6.27016	5.09966	3.35741	3.5656	6.57824	4.01262	4.23078	5.47546	0.60625	3.80597	1.24281	1.26264	1.94531	0.358557	1.74645	1.11435	1.87869	1.4884	4.98672	2.20463	3.42223	3.74728	6.01374	5.72848	3.86546	4.92423	4.26832	5.38888	5.44912	3.65315	5.24553	4.68909	4.4029	5.24207	4.6393	3.01208	0.619478	3.93765	5.1386	0.366439	4.44819
2020-09-09	5.39415	7.12679	8.48721	8.06885	4.60752	7.47696	6.53402	7.83331	8.43747	5.22933	7.42161	4.88203	5.99257	6.20052	4.3359	6.15025	6.05022	6.04816	4.10021	6.23648	7.23196	6.43335	7.57887	6.88439	7.34233	7.2261	7.06725	6.78453	7.10355	6.86015	4.72066	6.21473	5.4358	7.9588	8.50977	7.07913	7.7361	5.34343	9.2299	8.15851	4.43123	6.09963
2020-09-11	15.3528	16.3748	16.4	16.4651	19.4157	15.8617	21.5056	20.0204	21.2079	14.2387	25.4843	12.8921	13.0842	10.4847	9.40427	13.9033	11.3092	15.6133	11.1891	21.8152	20.0178	17.2688	18.7381	17.7719	21.0594	17.1585	19.8706	20.1592	21.627	20.218	19.8925	13.1507	17.4191	19.5473	25.0974	21.4552	16.9531	14.7236	26.366	19.3074	5.91805	20.3625
2020-09-15	4.19692	3.18294	2.51256	1.07754	2.87765	3.33934	3.44112	3.55657	7.58499	5.46187	4.59502	5.48404	5.8318	4.89633	7.64998	5.2577	5.39527	2.05442	6.03528	5.16062	0.471318	1.81331	1.82686	3.70597	0.493882	1.07742	5.34974	1.1905	4.54386	2.99325	2.94831	0.711951	3.40147	3.52329	3.81265	2.35528	3.15049	5.58104	4.754	1.95343	7.81816	2.62287
AAAS	5.33956	6.25953	6.66329	7.83293	4.26081	6.56708	6.00937	4.68781	8.32566	9.31885	5.31219	9.81385	8.78454	8.92852	10.326	8.8972	11.13	6.93117	9.01738	4.58506	3.32097	4.89484	4.3021	4.08938	4.70887	8.99204	5.95044	3.30154	5.37001	2.74099	4.36544	6.208	7.11125	6.15285	4.58672	6.36192	7.17948	10.2625	5.49597	6.62581	10.1343	6.60603
AAGAB	4.49282	2.82526	2.77736	3.91001	3.07773	2.96408	2.57002	3.12307	2.88635	2.25179	2.83412	2.89228	3.31186	5.17286	4.00169	4.47254	3.95451	4.69298	4.66492	1.67451	1.34157	3.35916	1.88559	2.66091	4.23868	3.57893	4.57123	2.84643	3.62655	3.86651	2.96221	2.58956	1.95173	2.63139	3.99036	1.64881	4.40367	1.56404	2.93217	2.19466	4.08966	2.5637
AAMP	5.13932	3.90202	5.21645	3.94444	10.4613	4.09374	5.5724	6.02239	5.43572	2.51592	6.66294	3.90586	2.82277	3.1095	3.95575	2.34022	2.86052	3.55046	5.07839	3.58083	13.3691	6.92238	4.95083	4.94588	5.10074	5.28135	4.90351	4.42547	5.58171	5.11599	9.1275	8.90424	5.83704	3.67895	8.04351	3.86986	4.56093	2.57081	6.89345	3.53985	3.53317	4.15796
AARS	23.1889	25.8147	33.1762	31.3225	26.1925	30.7968	26.338	26.9488	42.7783	18.111	34.4283	17.7258	14.5561	17.694	16.1054	16.4012	16.6749	15.3716	16.5948	23.175	27.6295	21.1097	28.3251	25.1993	25.7304	25.3032	25.2635	28.0354	26.0835	31.0226	26.7781	25.9362	17.7716	26.9669	35.9774	33.0609	34.9453	18.3988	34.9216	28.9923	16.6086	31.0108
AARS2	2.38035	2.71388	3.52752	3.8211	1.60678	2.84722	1.82745	1.39092	4.89615	5.62217	1.80247	5.99482	6.21526	6.13792	5.62441	6.87081	6.35706	7.799	5.08981	1.68696	1.94911	1.45487	1.94348	1.8066	1.64013	1.89495	2.18597	2.17781	2.19606	1.57472	1.64624	2.07181	2.78329	1.87109	2.24079	3.41821	4.64005	5.66522	1.86483	2.92514	5.74805	2.59685
AARSD1	1.35101	1.6333	1.15583	0.450195	1.53354	0.758554	1.67842	1.56634	0.972374	0.627475	1.7559	1.32524	1.10755	1.05742	1.04257	1.32742	1.52055	0.935485	1.32597	0.577955	0.530482	0.362295	1.72522	1.96801	1.86544	0.726453	1.39559	1.19141	1.02598	1.42465	1.5712	0.929939	1.2131	1.7185	1.98007	0.877963	0.898664	0.641166	1.6054	0.619206	1.06549	0.546144
AASDHPPT	6.30234	6.53965	10.165	12.0472	4.66614	6.86097	6.07614	7.32391	7.09489	5.67873	6.0634	4.1268	8.2635	6.30106	4.11024	4.78984	5.88954	4.66971	4.36666	6.61716	5.35151	6.28085	6.57289	5.87788	7.52165	8.25848	5.71913	7.47118	6.36736	5.92058	4.9679	4.84276	3.47018	6.22122	6.97848	11.1307	11.2095	5.43327	6.27317	8.71193	4.2006	9.05031
AASS	1.49558	3.88935	3.6885	4.04234	2.95801	4.54485	4.41174	2.16861	3.21282	1.16255	2.12372	1.29657	1.56381	1.81681	3.36901	1.87769	3.58524	2.01775	3.62808	1.54244	2.70593	1.73039	1.84083	4.79959	1.41315	1.44062	1.13482	2.16244	1.544	1.67925	3.03065	1.6357	1.96526	4.76799	2.5484	6.09364	4.95059	0.864141	2.1972	3.1488	3.60231	2.84472
AATF	6.29175	8.99109	4.4089	5.02197	6.16588	8.90678	9.59758	6.82631	11.3038	15.9317	10.81	17.6623	12.2942	13.8902	17.7798	12.6338	15.4146	14.6957	12.4675	7.46707	6.4402	9.04286	3.35973	5.36488	9.46142	6.93069	4.31412	5.87962	9.80246	9.15192	6.31729	7.67933	6.84139	9.67406	9.5057	4.699	7.67736	16.3999	11.184	4.87513	14.8694	2.02532
ABCB10	0.328942	0.249542	1.50978	1.05394	0.424477	0.384286	0.259158	0.402221	1.2	1.77175	0.341113	2.35541	1.89079	1.99408	2.26033	1.84187	1.90757	2.46538	1.515	0.492894	0.349242	0.154195	0.316486	0.26151	0.333604	0.35873	0.555996	0.339739	0.338485	0.429606	0.434901	0.677999	0.384994	0.265346	0.536354	1.23001	0.697782	1.8104	0.352915	1.3483	2.44125	1.03764
ABCB7	1.43393	1.2976	2.32721	2.10512	1.29036	1.36136	0.429504	0.234892	1.07089	1.47265	0.788479	1.9341	1.17351	2.18516	2.06954	1.87672	2.19705	1.67356	1.42558	0.794862	1.54432	0.438045	0.717062	0.575243	0.746523	0.415773	0.325456	0.676783	0.509575	0.683635	1.32204	1.30666	1.09456	0.369969	0.572782	25.412	2.19363	1.64851	0.590231	1.08409	2.11504	2.37491
ABCC1	0.674879	0.36544	0.628939	0.488972	0.5437	0.539329	0.604105	0.406986	0.739214	0.533308	0.805564	0.847088	0.352279	0.570029	0.338195	0.683895	0.875851	0.923306	0.658278	0.862057	0.410189	0.501814	0.406348	0.14129	0.649728	0.693853	0.424856	0.422714	0.397349	0.300466	0.557051	1.25084	1.40049	0.618529	0.737226	0.785539	0.842517	0.592202	0.875789	0.393689	0.14504	0.403159
ABCC4	0.158938	0.240137	0.274193	0.253784	0.0785999	0.251936	0.113432	1.16059	0.146444	0.399872	0.347112	0.516099	2.83237	0.454128	0.107233	0.195693	0.47995	0.497208	2.4745	0.587861	0.109841	0.242531	0.110896	0.762527	0.452131	0.0765667	0.133227	0.171756	0.0478018	0.0828102	0.08053	0.131457	0.0300782	0.11614	0.771737	0.15771	0.409324	0.374616	0.281898	0.253488	0.10959	0.0932221
ABCD3	2.49835	3.58341	5.37624	5.14362	2.70553	3.54646	2.65171	3.53802	4.27905	3.02071	3.03426	5.31447	4.61372	3.43269	4.05673	3.93165	4.75144	4.04055	4.56311	2.96567	1.99104	3.47796	1.876	3.07599	3.83161	2.34024	1.87508	1.93299	1.68883	1.67067	1.84562	3.6224	2.62676	1.85292	2.73823	4.87145	6.71345	3.08662	2.12348	4.94308	4.14592	4.47737
ABCE1	15.8007	14.4711	16.1373	13.5272	17.2545	18.7391	21.9124	19.1306	21.6626	13.3739	17.9083	14.0735	20.6182	19.7228	14.8543	17.7475	13.6168	14.1614	13.0329	14.1918	15.7633	14.5407	18.3712	22.2008	17.9446	17.6725	18.2708	15.3107	17.3231	14.5902	15.7919	15.9819	15.5429	17.6455	16.0577	16.2888	13.765	11.5042	17.7744	16.0632	11.2532	12.6582
ABCF1	7.22523	4.07948	6.87567	6.14124	9.25358	5.02844	9.68267	9.97308	10.0967	9.17639	10.836	8.9789	5.82915	7.32556	5.8129	8.29155	10.4024	10.3846	12.5834	7.1958	8.35609	8.51312	8.64965	8.01577	9.17763	8.21351	7.39294	6.87183	5.95249	5.23976	9.18357	8.22271	6.1596	9.80931	10.6578	5.79688	6.13226	9.12296	10.9078	4.89782	5.78022	7.91981
ABCF2	6.24098	3.7616	5.09262	4.88288	6.4374	3.94642	4.21789	4.79011	2.7512	8.65188	5.13192	10.2502	4.72216	11.681	8.38672	9.15434	9.1752	10.12	9.53217	3.00219	6.11683	3.26489	3.86895	2.88447	5.06751	4.62647	3.09992	4.65397	3.03394	4.43694	6.52919	7.72445	5.934	3.66675	5.14221	5.15339	4.31496	7.07517	4.84375	3.23466	8.00967	4.2575
ABCF3	0.346633	0.970503	0.529833	0.646906	1.01254	1.10548	0.610896	0.772283	1.04216	0.74309	1.02633	0.676954	0.324281	0.473177	0.484786	0.453812	0.505425	0.775182	0.446317	0.209408	1.14237	0.67552	0.721539	1.05819	0.584326	0.459196	0.83195	0.479252	1.10957	0.841148	1.0374	0.615961	0.379677	0.625482	0.694519	0.494599	0.437116	0.759303	1.06184	0.586419	0.495444	0.429788
ABHD10	10.6756	13.8102	27.5329	30.9006	9.61715	11.9238	14.8206	13.8822	19.867	12.2997	11.8275	12.2848	13.6271	17.9224	15.6822	12.4276	14.6483	12.1318	12.4879	12.6988	12.805	21.5785	13.9848	14.8241	13.5712	11.2401	13.7197	15.648	14.525	14.9539	9.56836	9.56212	11.0424	13.8643	12.8437	31.0952	24.4091	12.8974	10.9739	28.6776	16.027	25.6993
ABHD11	0.840208	0.380187	2.91308	2.78337	0.445505	0.598307	0.695543	0.979512	1.05832	0.607625	0.587585	1.51895	0.691942	1.70816	0.751324	0.606963	1.30478	1.4199	0.615626	0.330578	0.273429	0.352201	0.159546	0.424079	1.33689	1.11546	0.505759	0.394151	0.159174	0.376006	0.456444	0.974262	0.325146	0.71215	0.816519	2.1801	2.60247	0.620882	0.607914	1.11177	0.767842	1.14838
ABHD12	0.479362	0.731716	0.475576	1.02651	0.344685	0.767669	0.523794	0.48139	0.135034	1.01664	0.915031	0.941523	2.04327	1.54404	0.830985	1.20443	1.40682	1.2288	0.947996	0.224363	0.51202	1.20201	0.760378	1.2194	0.849926	0.846709	1.14554	0.767121	1.15719	1.04164	0.353149	1.19058	0.32911	0.536301	0.27927	0.90996	0.510134	1.03882	0.946688	0.602835	0.849254	0.180898
ABHD14B	4.356	3.39459	12.1321	12.9255	8.72433	3.56138	5.0975	7.87034	7.97104	4.35968	9.1579	2.66607	1.86132	3.24408	2.78589	2.74283	3.03754	3.33876	2.87197	5.40097	5.97485	6.10983	2.29418	4.37134	7.20475	6.19634	7.43117	5.25446	5.28442	4.41215	8.93856	7.33633	5.65653	5.21921	7.56725	12.2965	13.8025	4.03766	9.47473	9.78952	2.84713	10.2671
ABHD6	0.38772	0.465706	0.419314	0.485829	0.445782	0.488588	0.389779	0.449054	0.743278	1.63051	0.602069	1.06482	0.461024	1.16908	0.475049	0.22034	0.608534	1.29263	0.690128	0.44597	0.323742	0.890021	0.805444	0.267762	0.798218	0.557728	0.52712	0.503525	0.244749	0.764231	0.456728	0.381507	0.36794	0.399085	0.593693	0.21841	0.692349	1.66609	0.622898	0.561562	0.485493	0.106257
ABI1	4.03667	3.46952	3.5506	4.55767	4.02445	3.63999	5.88456	6.08472	5.90289	3.25224	5.59396	3.61903	4.17645	4.96546	2.64312	2.80185	3.34833	3.31568	3.41115	3.14363	2.73024	3.2392	2.74483	4.33929	5.52289	4.28165	3.69138	4.53934	4.43582	3.81496	3.90622	3.74936	3.38675	5.70802	5.13083	4.45502	2.19638	3.29027	5.48288	5.14539	2.06887	4.55578
ABRACL	43.4051	30.5615	30.143	45.5506	34.1207	32.0631	32.5514	22.0015	52.0882	24.3382	19.823	24.3369	33.1136	29.1413	29.2503	19.3914	19.6873	20.7444	22.2975	31.6518	22.7511	30.7152	16.4003	25.7204	48.0394	37.9017	40.035	26.4241	33.5149	34.716	34.9586	33.1869	37.0551	33.3286	30.4963	58.4939	52.6256	24.8692	20.5088	29.9643	29.8934	45.2091
ACAA1	5.1992	5.36191	4.20308	5.30861	3.45772	5.62537	6.51092	6.16973	11.179	13.212	7.58866	12.1867	16.5161	12.5572	15.2886	12.6872	11.6588	12.5188	10.0878	6.96496	2.99416	5.33632	5.53039	6.8024	6.90332	3.77866	5.19416	5.68642	7.14684	5.91665	4.15369	5.02366	4.7063	6.66638	7.4106	5.72653	5.99065	13.5003	7.26268	6.52394	15.7378	3.6344
ACAA2	7.69697	10.243	9.83076	12.0994	8.66661	10.7463	8.97924	9.82464	17.5777	18.9312	10.1589	15.7296	14.2345	12.6368	16.4267	18.248	12.4922	14.5637	14.5446	6.22053	11.3599	8.46507	9.09845	11.0953	8.36027	9.4613	9.97504	10.229	10.803	11.6558	9.18588	9.29117	7.0156	9.19363	10.9148	14.2403	13.3154	19.3443	10.7114	14.7976	16.7879	11.4071
ACACA	1.6823	1.72831	2.25882	2.35118	1.65049	1.76884	1.82243	1.93558	2.09533	0.796045	2.2373	1.48934	0.972314	1.37264	1.2021	1.13522	1.27471	1.2017	1.01228	1.33777	1.40436	1.64853	1.43036	1.43396	1.63781	1.45884	1.52673	1.51506	1.79379	1.33136	1.66874	2.36641	2.01712	1.8491	1.95173	1.80161	2.2117	0.813413	2.28761	1.91239	1.22852	1.03448
ACAD11	1.55586	1.87016	3.7731	3.58034	1.4178	1.96205	1.86376	1.69184	5.07824	0.809427	2.04476	1.012	0.994898	1.26226	1.06377	1.23468	1.20692	0.828106	1.0193	2.65621	1.2884	1.76726	1.94768	2.1025	2.57614	1.05888	1.78106	2.14023	2.1492	2.15246	1.45261	2.01303	0.974015	1.81989	1.74156	3.5882	4.47111	0.827088	2.1155	4.05156	1.12991	2.71157
ACAD9	4.20731	4.50206	3.90882	5.50972	1.41472	4.50887	3.20651	2.10535	3.99315	7.36543	2.34215	9.84843	5.66789	10.1173	7.56642	7.14429	11.078	9.05197	6.73697	3.32551	4.53787	3.25956	2.05808	2.77299	5.08619	2.997	1.25204	2.32623	3.28933	3.46609	1.31659	5.78466	3.7855	3.28307	2.56757	5.70314	4.18151	6.42085	2.42318	5.46403	7.33204	5.49776
ACADM	12.481	11.2779	24.3778	24.4217	11.5145	11.832	14.5378	10.4293	21.8454	33.4347	13.6043	33.1856	35.9233	28.876	26.6363	24.2035	34.3593	27.9204	28.2457	11.6678	8.19547	11.8908	15.7109	11.3076	14.3338	13.842	12.4115	13.3013	10.3816	10.5876	11.7972	13.1437	13.3925	14.8849	13.6053	20.4568	25.1034	34.1642	14.075	21.5896	27.2218	22.9433
ACADS	3.22934	3.86413	8.94689	7.16344	2.04952	4.4794	5.068	3.48227	5.26767	2.96646	3.56837	2.00527	4.12645	2.02143	3.30947	1.07392	4.02072	2.84911	3.46133	1.7744	3.11923	1.82332	1.68449	2.0848	3.57861	1.3303	2.70887	2.87718	3.67619	3.29057	2.21582	3.42893	2.2699	5.18901	4.49212	9.18505	8.11684	3.03118	3.47193	8.25616	3.38222	6.45048
ACADSB	2.61332	3.32289	9.18413	8.34088	3.90661	3.48615	4.37317	3.51988	6.83519	6.87826	4.07566	9.3926	9.98987	9.1006	10.157	10.9163	6.1409	7.78115	9.07041	3.67834	4.16751	3.3293	3.01358	4.09666	2.32378	2.89373	4.95851	5.02083	3.40491	4.70199	4.00254	4.18746	3.61971	4.12626	2.84231	9.65373	7.09209	7.02833	4.21666	13.7821	10.5989	6.64623
ACADVL	2.75231	3.01217	5.27182	4.95612	2.38026	3.08306	2.08703	2.19382	3.54949	4.34335	2.67524	4.66229	5.29205	4.21245	5.53691	4.3523	6.19362	4.53453	4.71347	2.13437	2.62157	2.82675	2.05438	2.29716	2.45608	2.55879	2.32725	2.09867	2.09597	2.11684	2.49969	3.00687	1.98864	2.19029	2.503	6.41643	3.62578	4.61552	2.83699	5.26895	5.49648	5.59531
ACAT1	37.5959	53.8342	84.2805	80.2735	38.746	56.4793	51.5739	53.1074	76.2996	67.1112	59.2426	110.776	89.2378	68.0121	117.732	100.131	86.2987	79.1123	104.19	50.9403	60.0249	34.5494	45.4493	34.7906	48.4671	50.7613	54.0663	54.898	61.4572	58.6627	39.563	35.5986	49.3131	52.8053	60.1394	75.3952	74.9619	68.4182	61.1475	88.4439	126.147	64.0333
ACAT2	20.0633	33.6663	25.0008	25.2762	16.9621	35.743	25.3672	23.2986	27.2712	18.424	29.9161	15.6164	20.4361	15.3382	21.5803	12.2594	13.2964	18.1447	16.3411	23.7318	25.2911	23.1469	24.3284	23.2193	24.3418	23.5389	28.7878	21.5921	23.2694	24.4171	17.1867	21.1208	26.8977	25.9728	26.0824	25.6013	34.8053	18.826	30.9511	33.689	22.0547	17.649
ACBD3	9.87874	9.20585	12.5096	13.631	11.9703	9.65817	16.8499	15.025	19.9919	17.8844	18.1829	21.8345	9.15293	18.0517	13.7545	23.2792	20.1087	21.4273	23.0081	10.8095	10.2823	11.1879	10.979	14.633	13.651	11.5148	13.9271	12.2713	12.0986	11.6456	11.9025	13.6663	15.7328	17.2522	17.6274	11.1225	9.98185	16.4925	18.812	11.2241	14.0569	8.10274
ACBD6	1.258	1.05446	0.872859	0.811188	0.459965	1.10627	0.612623	0.719074	4.42319	1.25853	1.47622	1.26909	2.43186	0.966267	0.871545	1.1446	1.60333	1.24838	0.800331	1.5423	0.496241	1.06211	1.34505	0.526126	1.51969	0.630745	0.930898	1.5941	0.761493	1.70113	0.661521	0.99632	0.904708	0.738146	1.32661	1.2635	0.690013	1.28599	1.5273	0.899475	0.890705	0.842097
ACIN1	9.49982	9.48645	8.43515	7.33888	10.6749	9.91946	10.6179	12.1338	13.1255	10.4276	13.5777	10.0144	7.41033	9.64914	7.52223	9.80124	10.8996	10.669	12.0719	10.7926	10.814	10.1793	9.76602	9.29323	10.7021	9.13007	11.5055	8.44877	9.43227	9.38018	10.937	10.6886	11.152	10.8714	12.417	8.16053	8.36864	10.9558	14.0475	10.2196	7.6876	8.81003
ACLY	27.0016	19.0601	36.5158	37.3956	24.1669	21.9739	21.5242	19.2057	23.556	18.7701	20.9987	19.9942	16.9525	24.2893	19.3982	17.851	22.3351	18.4674	21.2638	20.3378	28.6078	16.2644	15.5428	18.2145	23.3563	24.0241	18.8018	21.7535	21.4284	21.1586	24.4386	25.8828	18.314	21.9751	19.827	35.6318	43.9188	20.3647	21.919	33.1496	18.6581	33.9728
ACO1	1.2924	2.39432	2.02034	1.68285	2.44503	2.51196	2.83114	2.92816	1.38592	1.67721	2.70434	1.49053	1.93102	1.26436	1.50364	1.33527	1.65873	0.686932	0.919116	2.41348	4.52876	2.26213	2.38757	2.65639	2.49807	1.9115	1.51421	2.5367	3.7032	3.43185	2.50507	1.93782	1.47252	2.69337	2.2035	2.14697	2.76181	1.7138	2.7979	1.88959	1.53669	1.44025
ACO2	15.3126	19.7569	27.5305	28.012	18.0086	20.7276	23.1207	20.9321	31.5773	42.8543	25.223	36.5198	38.0045	41.9615	34.7394	45.1984	42.8234	41.3881	34.3799	23.1876	17.9295	22.2076	23.2261	25.6162	19.8756	21.8059	21.0987	21.0057	19.7197	21.2019	18.6559	18.5133	17.7206	23.6379	24.9741	30.2243	29.2392	45.903	26.0956	26.7101	34.7658	25.9405
ACOT1	2.69134	1.9715	4.81853	5.24221	2.23963	2.06837	2.04253	2.9086	2.13083	6.29324	2.36019	4.71409	3.03933	4.31322	2.62141	3.0104	3.55991	3.29374	3.80952	1.75061	1.85037	3.68819	3.62528	3.10135	2.92459	2.7293	2.59039	1.78607	2.74439	2.35749	2.29463	2.99371	3.57248	2.0913	1.55858	4.56331	3.90998	3.75755	2.44184	2.87165	2.78763	4.68649
ACOT13	11.0147	9.13725	39.284	33.7846	11.6937	9.5862	14.2525	10.8266	23.7266	23.2115	15.0995	35.3654	20.1943	27.3461	38.8743	19.7359	20.2816	33.0178	28.5304	5.00827	13.1139	6.45271	8.84923	8.62609	8.44555	8.54735	8.37808	7.98892	8.47167	9.29891	11.9808	12.5342	5.06826	14.5928	11.7007	39.5186	22.9843	23.7179	15.6219	25.5534	39.729	26.1437
ACOT7	7.12251	6.09998	12.2806	8.89264	3.97707	6.3997	7.85627	11.5839	9.38749	5.78536	7.4001	7.07384	8.01498	8.42881	8.99221	8.59802	8.56121	7.05679	8.54746	5.30304	7.35197	4.44218	8.36778	5.20778	8.06012	7.76046	8.10608	9.75186	7.58812	8.92682	4.07473	6.6266	4.51523	7.24878	11.0865	12.0371	10.8395	6.15162	7.65612	9.21397	9.18989	11.6519
ACOT8	1.03227	0.580672	1.57817	1.11266	0.60775	0.870166	1.07159	1.20495	2.39649	1.51395	1.22578	1.57032	1.75386	1.45951	1.91921	1.69033	1.79337	1.65723	1.97309	1.23785	0.782998	1.87037	0.960077	0.617104	1.06746	0.951228	1.22495	0.919976	1.47773	1.2705	0.622673	0.838312	1.16808	1.09718	0.40245	1.44924	1.79768	1.35966	1.26819	1.0485	1.9614	1.30574
ACOT9	1.54949	1.63139	3.90953	4.03604	2.23116	1.71154	1.95055	2.59173	3.05644	1.72196	2.54293	2.72737	2.26464	2.0342	1.63039	2.28725	1.44699	1.76863	1.54567	1.79188	1.64489	1.78929	0.747151	1.42893	0.910433	2.05155	1.47672	1.23079	1.15549	2.01452	2.28595	2.17423	1.06116	1.99713	2.42862	4.22032	6.77736	1.75953	2.6309	3.40516	1.66623	5.21502
ACP1	192.474	102.288	111.143	91.7973	73.5369	106.823	119.87	104.452	122.183	81.3917	120.323	64.0299	99.3805	82.6515	54.3383	66.7274	75.5767	72.9845	61.9281	98.229	70.9078	109.059	132.955	123.842	108.513	111.922	94.9433	104.322	81.8688	95.2441	75.3426	85.3226	81.4396	122.732	104.422	98.0115	108.881	83.1675	124.485	84.7214	55.5329	86.3605
ACSF2	0.875933	0.634091	3.92881	3.77076	1.12709	0.665247	0.948817	1.10872	3.59348	2.19179	1.46711	2.38993	1.43529	2.04562	1.53445	2.09423	1.4526	2.60961	2.38272	1.07341	1.34461	0.198517	0.973826	1.48939	0.877391	0.878185	0.781506	0.743797	0.927658	1.06167	1.19547	0.986563	0.390631	0.971472	1.57659	3.8938	3.38775	2.23961	1.51787	5.38951	1.35616	2.59956
ACSL1	0.80998	0.838065	1.51404	0.88934	0.606243	0.879243	0.645687	0.818104	1.37695	3.54882	0.898642	2.74875	2.44047	3.33253	2.56626	2.64523	2.82185	2.71074	3.39696	0.811203	1.22015	0.9166	0.800328	0.756393	1.10873	1.27626	0.973374	0.84055	0.884265	0.724208	0.62113	1.03808	0.805353	0.737258	0.782145	1.18269	1.07165	3.62625	0.729017	0.813726	2.62267	0.503399
ACSL3	9.14423	6.87009	7.16319	7.10596	7.73405	6.32209	6.9658	8.49799	8.34117	13.7984	10.1286	10.6306	8.93305	11.8381	10.3113	8.21554	11.1087	12.0425	10.8147	8.72354	5.6767	6.92756	8.26243	9.40197	10.1807	9.60299	10.2825	7.84905	7.85424	9.73731	7.92397	11.2051	9.85716	7.22671	9.34769	7.49511	9.47339	14.0995	10.2367	6.79208	10.538	6.66375
ACSL4	0.922107	1.84686	3.3659	3.11042	3.17781	1.9376	3.40871	3.75291	2.23318	3.22001	4.15291	3.03042	3.53819	4.84463	3.7416	3.98446	3.64427	3.11954	3.57318	2.25105	1.88217	2.31719	2.10149	2.30837	2.90785	3.17346	3.39207	1.8715	1.58155	2.27977	3.25584	3.4796	1.96016	3.1918	3.78515	2.94699	3.40934	3.713	4.05941	2.22881	3.82386	3.78417
ACTB	55.0422	30.577	15.1659	10.3811	23.5455	32.0794	33.9161	33.685	30.5881	18.2096	40.0485	50.7335	4.22082	44.0227	40.1474	52.315	52.832	12.7108	77.628	38.8162	40.1368	70.4235	28.5102	27.7318	83.1196	38.5317	35.0132	25.9591	46.7473	51.6755	24.1237	64.1542	56.3968	34.7259	44.1027	14.1703	16.8362	18.6069	41.434	9.10453	41.03	12.576
ACTC1	31.7974	88.4816	29.0421	21.5054	22.6864	92.8291	33.0011	20.7305	24.0041	56.8916	40.9242	42.6436	85.9265	44.5697	41.0597	59.3743	39.9555	44.3212	69.539	136.066	82.9391	114.657	43.5124	126.077	105.426	67.0351	56.0686	120.889	116.375	113.772	23.2435	35.4808	93.7641	33.7891	31.4908	31.7077	90.435	58.1329	42.3401	31.6827	41.9623	21.89
ACTG1	1025.41	851.809	747.616	900.099	897.171	899.228	786.753	888.679	803.568	1130.18	914.335	864.881	1181.77	960.781	1204.62	886.162	893.055	977.633	1288.03	1035.51	1110.87	1021.66	882.213	862.098	1115.48	1014.91	970.116	991.109	1062.56	1047.54	918.818	938.716	1089.3	796.544	883.887	851.636	887.776	1145.5	933.857	882.203	1230.88	1103.85
ACTL6A	13.3415	12.4478	16.0497	21.7375	15.5626	21.2868	12.9575	13.0253	35.1921	9.88293	13.5075	6.5696	7.11876	6.77514	9.73015	9.9953	9.89653	9.31595	8.29293	11.0119	10.5699	14.4414	15.2481	12.3775	15.0345	14.2271	14.9997	13.6495	11.9278	12.9175	15.9447	13.8948	14.8261	13.3532	15.157	18.4229	27.865	9.66994	13.3954	14.8231	9.94406	19.4908
ACTN1	7.63787	5.83086	6.73605	6.64273	6.50891	6.45149	8.10968	8.52076	9.87882	7.80576	9.61412	8.79153	4.37646	8.21841	6.14349	8.0353	8.06244	9.07684	7.75619	8.68241	8.63926	8.1554	7.92991	6.95302	7.3909	7.45302	7.23339	7.25197	7.27692	7.88257	6.71421	8.63755	6.81041	8.30331	8.45647	6.20166	5.92707	7.97607	9.4623	6.08607	5.65863	6.10135
ACTN4	29.4343	28.2466	31.6144	31.4132	31.1604	29.8151	35.9105	36.4201	57.8046	24.9901	35.499	28.1747	21.3235	26.0807	21.395	26.0949	23.5646	23.9715	23.5327	35.9272	26.3534	35.5955	31.4366	35.6892	36.3143	33.9332	35.9701	31.3112	28.0496	27.4926	30.7289	33.7777	28.7811	35.5116	37.3227	31.7805	34.326	25.5096	36.0784	35.5008	21.8653	36.1669
ACTR10	2.3827	1.4538	2.30059	2.33013	0.913214	1.52523	1.45532	1.40542	1.88305	0.677099	1.25001	1.08682	0.280638	0.821917	0.508854	0.564155	0.768567	0.685529	0.598755	1.8256	2.44171	1.67349	0.823147	1.19311	1.19434	1.21378	1.29812	0.860041	1.11179	1.22654	0.935638	1.46707	1.40713	1.49007	1.09854	1.88615	3.22696	0.535482	1.29326	1.4891	0.520041	1.49345
ACTR1A	18.7754	23.9563	24.8067	26.0301	19.1511	25.1334	20.2706	21.3968	25.7238	7.73813	24.4884	12.4225	12.2873	12.9179	10.4035	13.1901	10.5247	12.4028	10.84	23.431	20.2882	30.1229	21.9102	21.4143	30.0923	23.4706	26.5839	22.5847	18.7587	24.9975	19.6214	24.8279	17.5853	20.7545	23.6447	29.7993	31.8663	7.90696	25.3356	27.2751	10.6322	23.8412
ACTR1B	4.55173	4.36403	4.53568	6.64089	5.01031	5.33825	7.17229	7.31724	6.66494	2.41785	7.13751	2.02061	1.16739	1.84687	2.5429	1.56063	1.58597	1.24002	2.3212	2.74211	6.40425	6.15305	4.47543	3.82846	7.49769	6.31555	6.30306	3.9715	3.35705	3.19907	5.0106	5.95101	4.70939	7.34354	6.64	6.10966	2.59651	2.4706	5.08643	4.98168	2.47386	4.17964
ACTR2	14.4677	9.81712	27.0164	25.1248	16.2597	11.0131	24.1807	21.3799	12.8072	12.7983	25.621	12.7544	5.94704	14.0653	8.19834	11.471	14.4186	11.4501	13.9491	14.3667	15.978	19.1743	16.1415	15.5842	23.1811	19.2632	18.792	18.4453	10.3734	12.9419	16.7496	23.4266	8.77413	24.7581	26.0139	25.352	24.354	13.0775	26.5074	23.0032	7.15408	23.3868
ACTR3	28.3121	39.2819	24.8464	16.4781	26.1752	41.212	37.0078	40.2086	43.0035	19.9803	44.3595	17.7786	14.7337	20.8748	23.5869	22.3113	19.0362	22.0828	17.9907	32.4254	25.5868	34.0121	35.9263	44.6572	36.8167	34.7985	42.2201	33.9891	38.1581	36.843	25.9701	36.7979	32.3817	37.8914	43.1093	25.1226	27.9983	20.4162	45.8942	29.4917	24.2399	21.1412
ACTR5	0.108863	0.0586575	0.130402	0.191654	0.337084	0.0615396	1.11641	0.240619	0.485942	0.375733	0.47348	0.356754	0.0883951	0.505736	0.236132	0.34785	0.411661	0.175792	0.425644	0.434484	0.269803	0.148163	0.18834	0.211961	0.285555	0.40048	0.492272	0.0480656	0.212	0.34533	0.345361	0.225468	0.237089	1.14306	0.0656268	0.221004	0.174985	0.38393	0.489861	0.244224	0.241323	0.255566
ACTR6	0.653787	0.550341	0.885401	0.82502	0.701785	0.577381	0.453954	0.646348	0.6852	0.649923	0.785189	0.508014	0.695882	0.523876	0.563044	0.543471	0.838364	0.77837	0.280679	1.21759	0.614144	1.49692	0.837636	0.568676	1.51415	1.12675	0.716313	0.941574	0.589152	0.889278	0.719017	1.32021	1.08527	0.464793	1.16354	1.12053	0.890663	0.664104	0.812354	0.404122	0.575422	0.68922
ADAM10	0.586579	0.686029	0.626572	0.352724	0.309385	0.719736	0.899869	2.63019	0.387799	1.5151	0.977041	1.55598	0.61088	1.42163	0.936513	1.46505	1.55393	1.02622	1.52234	0.694691	0.600978	0.771375	0.705552	0.580178	0.837096	0.574799	0.61972	4.1776	3.62098	1.0681	0.316982	0.864131	1.01537	1.12639	1.10402	0.635328	0.745277	1.5997	1.01084	0.281137	1.02549	0.53796
ADAM9	0.374645	0.460006	0.250759	0.405594	0.675442	0.482608	0.454935	0.555608	0.860234	1.11543	0.720521	1.04847	1.02415	0.673832	0.98625	1.03964	1.20779	0.982862	1.26682	0.396305	0.815	0.148622	0.282746	0.416273	0.0464833	0.419512	0.353824	0.420019	0.570921	0.584916	0.692028	0.78051	0.324339	0.465797	0.466183	0.105729	0.149397	1.07521	0.745449	0.146207	1.00793	0.130041
ADAR	81.5565	57.4461	103.703	94.8717	96.7712	60.2757	75.6169	83.641	70.6665	86.1606	84.5556	88.3228	65.8934	92.8766	80.3973	79.4255	89.2185	99.1355	102.907	66.9948	127.059	94.7287	75.3458	81.5329	99.5694	80.3339	73.881	84.5589	79.8078	79.5703	97.9739	104.517	85.055	70.094	76.3949	106.764	111.063	88.0405	82.9298	102.303	78.1314	95.8674
ADCK3	4.39902	3.01719	10.2496	9.0786	2.88027	3.16544	5.77548	4.84384	5.43155	6.19964	6.40541	6.56269	5.35695	5.3233	5.10324	5.65748	6.50464	5.72533	6.82198	4.33925	1.76783	3.36284	4.2353	4.26635	4.97617	3.55776	4.25704	3.93411	3.51156	4.42632	2.5341	3.16066	3.66599	4.44622	5.03454	6.74332	11.14	6.3349	5.32086	7.84109	4.74623	7.49517
ADD1	5.23625	6.21866	8.45053	8.36701	7.07347	5.94245	4.11457	5.35906	5.25755	4.21917	5.56371	5.21331	2.51713	4.05593	4.43843	4.2741	3.53402	4.28706	3.42184	5.71995	9.16679	7.61581	4.7982	5.83619	6.73869	4.59719	6.38085	5.81262	5.92469	5.47215	6.87297	7.22738	6.52298	3.69098	5.82389	8.08081	7.6529	3.31262	6.00012	6.0626	4.00999	4.60555
ADD2	0.921215	0.662366	1.11228	1.06378	0.53289	0.634968	1.70127	0.865402	1.83106	0.359753	1.98648	0.272624	0.327427	0.279743	0.295519	0.307306	0.162953	0.436938	0.321193	0.89376	0.901133	1.15222	1.19158	1.19396	1.43235	0.845899	0.875312	1.14909	0.968211	2.50762	0.545976	1.61858	1.28395	1.74189	1.27394	1.50703	1.95251	0.446885	2.08499	1.5367	0.632573	1.57583
ADD3	3.53631	3.61114	3.28709	1.93176	3.36904	3.43024	4.75397	4.51205	3.05187	2.44073	4.43323	1.22615	1.21866	1.36949	1.5737	1.18333	1.90133	1.4405	1.51288	1.64876	4.03292	3.81166	3.29898	3.1973	4.13537	3.58181	2.46626	2.46325	4.14726	3.51528	3.45177	3.31473	2.82839	4.56205	4.52689	2.37903	2.49987	2.49398	3.94956	2.07522	1.79981	2.72584
ADH5	16.0947	21.8494	19.3036	18.4408	17.289	22.923	20.9716	21.1387	28.9174	9.31597	22.2319	7.78494	4.64418	8.92175	9.50252	9.83843	9.42538	7.94821	8.04532	19.3067	22.8939	22.4195	17.9977	23.1721	17.5504	20.1874	27.1283	17.1596	20.2269	22.6383	17.1644	20.2995	17.6268	21.4723	23.8111	19.5004	22.344	9.51923	23.0011	16.7105	9.71143	20.6886
ADI1	3.15524	0.303834	2.59284	3.3966	1.6786	0.318763	5.39071	1.0636	5.46387	6.60932	4.45202	4.08379	3.67014	6.32563	2.40507	6.98119	5.97619	2.73134	5.74818	3.53298	0.808255	1.91259	1.06098	2.61235	2.11097	3.87775	5.77865	2.76805	1.62469	1.48224	1.71982	0.803172	4.89677	5.51942	3.85131	2.13823	3.51084	6.75352	4.60604	2.88544	2.45794	1.58198
ADK	7.27806	6.99485	10.1159	7.87442	4.82679	7.33854	7.88844	11.0138	9.14264	2.93416	8.80103	4.25745	1.97076	2.64827	1.94783	2.54213	2.5671	4.11311	2.81878	7.14683	5.303	7.10859	8.07715	7.03658	5.6396	7.41328	8.04261	7.56	7.18219	9.14248	4.94532	6.05026	7.59023	8.07679	7.71115	11.9279	12.252	2.79445	9.10551	12.789	1.99065	9.74496
ADNP	1.9685	2.24147	2.79269	2.60624	2.5101	2.47961	1.9918	2.31561	1.55756	1.2622	2.92891	1.16441	1.23462	1.55396	1.11207	1.58594	1.54493	1.59844	1.24896	2.33639	2.50977	2.14117	2.49106	2.06494	2.17602	1.68728	2.37848	2.01516	1.9423	1.72897	2.69962	3.03191	2.98682	1.80985	2.46086	2.57596	1.98579	1.28974	2.60079	2.82694	1.0503	3.14146
ADPGK	1.84392	5.63128	4.75298	4.44793	3.78816	5.16548	3.82112	2.7632	5.23372	6.89942	3.99106	8.24705	5.06936	5.43173	6.53659	4.71189	7.20308	7.30674	2.93332	1.96005	3.18091	4.81525	3.07197	3.11118	4.86565	2.46479	2.32894	2.44086	1.9307	2.07198	3.88119	3.64961	2.40187	3.91236	3.98931	4.5432	5.99109	7.04995	4.12913	4.56494	6.52195	4.99497
ADPRHL2	2.9152	2.55756	5.4034	6.34035	2.84954	2.68323	4.35242	1.77458	2.23645	2.22301	5.37819	4.26725	1.66926	3.44299	2.4372	2.68598	2.34502	2.66107	3.77444	2.22405	2.31299	3.4496	1.83191	3.73035	3.1441	1.09548	2.68175	2.90356	2.00402	1.85886	2.91951	4.00379	4.353	4.45634	1.63569	5.50721	5.81246	2.27151	5.56425	4.54515	2.49078	3.44461
ADRBK1	0.308859	0.1221	0.0848958	0.395788	0.146967	0.128099	7.48859	0.292445	0.182739	0.120889	0.316113	0.0893551	0.257293	0.210288	0.138192	0.244897	0.298861	0.211091	0.0846588	0.24602	0.0868331	0.475152	0.382553	0.544314	0.402471	0.497469	0.476374	0.170788	0.405889	0.952401	0.150576	0.318985	0.398927	7.66739	0.301361	0.319015	0.278231	0.123526	0.32705	0.0523114	0.0633178	0.193716
ADSL	14.6236	9.76131	18.586	21.9934	16.3917	10.046	8.46788	9.72849	11.6311	5.24653	8.05817	5.65008	4.46123	5.65633	6.55534	5.6422	4.03524	4.70427	5.57196	13.1432	11.1259	14.5649	8.51855	8.0374	14.84	8.7693	8.43271	6.90219	10.1496	10.8522	16.7942	12.5371	12.1701	8.67006	7.55208	25.1845	19.1758	5.42636	8.33695	21.7776	7.9431	24.5765
ADSS	17.4953	18.3503	18.1204	18.1203	18.7838	19.4425	19.2721	19.4325	32.7052	14.1668	18.5442	11.69	11.7267	12.9945	15.475	12.929	15.4777	15.1459	17.5338	23.3695	17.5943	25.2342	20.9712	26.5777	18.4856	27.3871	23.1557	12.4512	15.5055	14.2841	18.1667	19.3425	18.1822	17.2148	23.2507	17.5502	16.3205	14.4759	19.1858	16.5481	14.6766	16.1133
AFG3L2	1.51087	1.99887	4.44901	3.83116	2.13101	2.31712	3.14363	1.98593	4.67301	8.82456	2.92018	6.26681	7.15717	6.50537	7.45721	4.07543	6.75032	8.12165	6.51042	3.00135	2.83485	2.51608	2.72481	3.53137	3.22281	2.63361	3.27095	2.49798	2.14026	2.56154	2.21659	2.05914	2.47829	3.29245	2.94545	4.11567	4.37182	8.46423	3.11017	3.47256	7.61768	4.37204
AGA	1.15489	0.833608	1.24681	0.725666	1.24605	0.874566	1.50273	1.79431	0.493941	1.34235	2.81748	1.30801	0.25413	1.26158	1.09683	1.33284	1.34108	1.59946	1.66764	0.58793	1.81169	1.37128	1.76661	1.77992	2.32468	2.21646	2.1628	1.30086	1.8239	1.42148	1.27665	2.10001	1.40227	1.53861	2.57969	1.25759	0.996576	1.37164	2.91496	1.1649	1.12095	1.02237
AGAP3	0.797738	1.06613	0.841918	1.08514	0.656731	1.11852	0.951086	1.11564	1.41841	0.795541	1.55355	0.585109	0.727191	0.85528	0.905098	0.455954	0.952876	0.642807	0.50026	1.27193	0.913398	0.395164	1.02318	1.52529	1.11477	0.749302	1.01327	0.797165	0.958281	0.960154	0.672858	1.04244	1.1714	0.973795	1.2219	1.03281	0.916836	0.812899	1.60729	0.882348	0.924996	0.661055
AGFG1	4.55947	7.27498	4.51587	3.55022	3.37361	7.63243	6.42397	9.0774	6.7237	2.45836	12.2122	3.28254	6.00912	3.54909	2.46362	4.66515	4.339	2.67472	2.34739	7.33122	4.54577	8.46574	9.12504	7.25916	9.27695	4.69104	8.13151	5.8316	6.39139	5.13666	3.45645	7.5202	9.3395	6.57735	8.64503	3.26186	4.76039	3.42723	12.6347	5.13949	2.93555	2.32992
AGK	11.5214	19.9875	16.2479	17.5716	11.941	20.4718	14.3198	14.9069	18.597	42.0672	15.2381	35.8496	53.2731	40.4669	43.461	39.3101	35.9329	41.2306	36.2335	15.9882	12.9276	16.4072	13.1788	8.61154	16.5817	14.0219	16.9272	13.3396	14.1251	15.3427	12.2343	17.1654	13.9158	14.6617	14.9706	18.7132	18.8452	42.7233	15.7653	17.1342	44.4165	10.6998
AGL	1.84461	2.42766	2.94698	2.74902	1.65536	2.4158	2.28055	2.7115	2.14879	4.17772	3.28192	7.11723	2.93635	1.0644	6.59393	0.919801	1.10203	1.01162	5.67729	2.82577	2.04097	2.70629	2.21592	2.81428	2.55836	2.26953	2.56251	2.53177	2.48939	2.35887	1.82197	2.24617	1.69077	2.335	2.61477	2.90995	3.87339	4.22337	3.32103	2.46214	6.6999	2.21312
AGPS	4.27112	5.07832	8.70138	8.40543	5.04374	5.32784	4.85762	4.29243	8.67253	12.9739	4.86686	12.5872	11.9144	15.8815	13.1756	13.668	14.3397	14.3304	13.1014	4.90334	4.26818	7.52621	4.67737	4.9213	6.84316	4.74725	5.39005	4.29774	5.16605	5.30725	5.16759	5.70915	6.8237	4.64826	5.91112	9.97224	11.1654	12.7482	5.03523	9.45575	13.4652	6.98813
AGTPBP1	0.310515	0.376721	0.160545	0.162376	0.26131	0.395231	0.229473	0.210316	0.166783	0.191982	0.304958	0.184966	0.209046	0.237964	0.0894901	0.258862	0.216343	0.193391	0.18025	0.305997	0.252475	0.472315	0.278404	0.188435	0.187342	0.13813	0.282585	0.203395	0.26435	0.223648	0.244109	0.205113	0.310407	0.234952	0.30509	0.277708	0.303202	0.196171	0.315508	0.0970711	0.0914574	0.174918
AHCTF1	1.36846	2.02373	0.510688	0.585691	1.41742	2.12316	2.00777	1.54585	1.83914	1.55863	1.64903	1.89072	1.87605	2.00031	2.12579	1.75332	1.63269	1.98511	1.61983	1.95809	1.55577	1.73372	1.51024	1.91724	1.78634	1.77033	2.03792	1.38348	1.1852	1.61703	1.45223	1.94237	1.94865	1.98485	1.96869	0.648514	0.847035	1.53412	1.84107	0.496377	2.17253	0.380539
AHCY	81.3646	101.808	93.5096	82.1332	85.4292	104.917	98.8932	86.7173	50.1588	52.1444	105.36	64.4951	66.1709	53.0211	59.9141	52.721	57.9799	54.9699	52.2515	73.5333	84.918	72.0853	95.274	70.7807	77.7478	85.5441	62.1961	103.527	99.8159	102.222	87.358	80.8862	80.3395	103.669	86.0816	81.1284	85.9323	55.2186	100.037	100.702	62.2924	101.867
AHCYL1	5.08717	3.21509	5.66613	5.4125	4.22243	3.37306	1.76765	2.42871	1.3625	2.88825	1.88385	4.64091	1.15609	4.90663	3.79544	3.43613	6.49422	5.18913	4.59289	1.77258	3.34345	1.90207	1.96148	2.16129	2.27109	1.93472	1.66222	2.05521	1.40987	1.16239	4.32612	4.1733	4.40273	1.80985	2.52565	5.69522	5.8032	2.95127	1.94902	3.51771	4.64661	5.53091
AHNAK	1.62457	1.31565	0.827838	0.690002	1.67867	1.2909	1.98662	1.80586	2.58046	1.29012	2.25104	1.24155	0.877576	1.47356	0.822422	1.40481	1.48566	1.32394	1.26323	1.68444	1.63273	2.11965	2.05	2.08834	1.84264	2.07366	2.12494	1.84007	1.63825	1.53592	1.70346	1.81768	1.60746	2.00509	2.15167	0.830104	0.818064	1.32312	2.31792	0.666796	0.837812	0.926891
AHSA1	24.4013	34.412	31.3955	32.0364	27.0816	36.1028	35.0701	31.1868	34.9619	15.6799	28.0995	16.5696	18.4641	19.027	20.0923	16.9365	18.7016	17.0945	13.3209	30.0247	30.054	30.4866	28.5724	34.0749	30.1515	31.8679	37.2698	28.0715	29.7495	29.5547	26.4578	14.827	31.3397	35.9074	32.4431	28.4315	40.1257	16.7873	29.0717	33.8826	20.534	20.9578
AIFM1	18.99	13.4732	26.4615	26.2614	19.7171	17.5668	16.704	17.976	23.6287	57.1995	18.8745	66.0921	41.4417	64.932	63.1027	56.4972	48.1678	62.3276	68.5282	19.8495	26.9874	25.3927	14.6586	15.8681	30.0395	19.9129	19.1152	15.8023	15.799	17.1242	22.4731	27.8689	17.4951	17.1028	14.3122	25.705	31.5126	58.513	19.5275	31.8895	64.49	25.8664
AIMP1	47.7971	38.8325	32.2722	37.1121	43.4177	39.8704	48.0746	35.3161	52.4596	39.1389	49.145	34.2168	27.2846	53.3547	41.6649	40.2691	33.2047	35.9821	38.5464	22.5832	27.8179	26.7609	22.0027	17.087	28.6018	25.7824	22.681	24.215	23.0628	20.9716	22.417	32.5011	36.0452	25.8135	27.6267	17.0797	20.3604	21.172	26.9179	19.9514	21.7768	20.6597
AIMP2	20.1025	19.1091	15.7285	11.9196	16.286	20.0481	24.4474	22.7538	17.5418	14.2481	26.0443	11.9905	15.5276	14.6845	12.8444	14.0748	14.2553	11.7269	11.5236	20.7533	14.7819	20.9846	20.8601	24.112	20.3471	18.6695	25.4386	20.1099	19.246	19.8874	24.2965	20.4667	18.5086	24.9904	24.9109	15.5308	21.5858	14.559	26.9454	17.8683	13.1268	11.3005
AIP	5.18676	5.10258	10.3875	12.0979	4.66659	5.35329	4.73371	3.70045	5.48158	5.71283	6.046	8.17789	3.65905	5.58277	3.07394	5.00372	5.07138	7.49867	7.26269	5.10858	5.45825	7.92915	4.59121	4.72566	8.2983	4.74411	4.13724	5.77106	4.92297	5.04594	4.78119	8.01153	4.76552	4.13788	4.27395	12.4021	10.2984	5.83748	4.50994	11.6523	2.75154	9.29059
AK1	6.97912	5.57619	9.87986	9.23614	7.25796	5.85017	7.85149	5.78767	13.2487	7.10929	7.51463	8.92986	12.5562	5.64115	6.80348	7.34102	4.46291	6.43126	3.4313	7.57466	4.15374	7.47799	5.18339	9.48042	6.39242	7.65824	10.4776	9.23487	9.01185	7.75231	7.43618	7.22679	4.26127	8.32322	6.33208	4.39969	6.177	7.2644	7.77461	7.31447	6.95305	6.25121
AK2	55.051	53.7279	91.9951	88.3193	91.996	56.3677	66.9975	77.16	97.4007	110.269	75.45	114.58	89.3537	115.54	93.0054	108.84	105.729	123.422	106.588	64.8341	81.1101	61.372	68.3574	58.4406	59.9694	73.2727	84.3101	70.5687	57.3145	56.7757	91.8434	68.4955	49.2751	67.6222	71.1269	100.551	76.0132	112.675	78.0603	95.4439	94.5839	108.705
AK3	3.15161	4.10088	8.29494	8.35548	3.91965	2.78391	4.13467	4.07129	6.99287	4.48092	4.46588	4.87014	1.76992	3.77828	3.05946	2.51035	4.28637	3.88031	2.69673	3.20813	3.10049	2.97241	4.04884	3.63046	3.17695	4.50909	2.5725	4.41882	3.46668	3.00092	4.0159	3.36748	2.59068	4.23339	4.36297	3.47545	5.54677	4.57868	4.71675	6.33353	3.12672	3.57686
AK4	11.294	9.81987	9.94435	11.1834	11.8623	10.3024	9.95577	13.7498	21.6952	18.4139	13.6593	18.9047	18.5055	19.934	17.4991	19.5645	20.5168	17.9955	18.7943	12.3803	13.6112	12.6411	14.6904	12.8901	13.8481	15.4914	13.3935	10.2203	13.9513	12.5659	12.1536	11.4961	10.0445	10.1935	13.5158	10.379	8.85693	18.8157	14.1319	10.0448	17.6843	11.903
AKAP1	2.82699	3.57457	1.6397	1.78913	2.4673	3.78857	4.50753	3.61342	3.0571	8.41229	3.89988	9.75852	10.618	9.66191	6.37672	11.1807	10.4979	9.28407	8.48954	4.30959	2.68001	3.88557	4.83421	3.2848	4.09724	3.25503	3.37549	3.7373	3.87936	3.6538	2.52788	4.44752	3.68522	4.61515	3.38842	1.00287	1.90039	8.91931	4.0348	1.5308	6.5169	1.11722
AKAP12	14.8402	13.074	7.55839	8.5207	21.535	13.7164	19.7017	18.4264	31.068	5.9358	23.1399	6.93364	2.2999	6.19015	3.29719	5.32013	5.85189	6.30469	5.93077	15.0718	19.477	16.4024	15.4152	15.3089	13.6961	13.5942	19.8988	13.7716	15.293	16.0737	22.0638	23.6037	21.7555	19.7995	21.937	9.03863	7.03754	6.06531	23.9615	9.03935	3.36967	8.40435
AKAP17A	1.45687	0.952959	0.842273	1.72128	1.77755	0.999782	1.07743	1.35693	1.91169	1.3561	2.15656	1.5038	1.7378	1.45785	0.201746	1.46392	1.75383	1.42979	1.95775	1.861	0.847215	0.8101	0.309637	0.989648	1.51028	0.654665	2.25661	2.18313	0.721456	1.06692	1.96951	2.02441	0.529006	1.10315	1.21863	1.25977	1.11775	1.38568	2.15091	1.40891	0.25161	1.09265
AKAP8	1.70435	1.50363	1.2945	0.742879	1.49029	1.57751	2.81841	2.08798	2.26648	2.78882	3.85463	1.71166	0.232888	2.58418	1.3453	1.96186	2.26342	2.59457	1.83913	1.98565	2.18275	2.75167	3.95191	1.59985	4.20107	2.24323	1.38476	2.55948	2.58849	2.97436	1.52688	2.34672	2.93424	2.88571	3.86595	1.07339	0.889176	3.2871	3.98799	0.884873	1.48111	0.960585
AKAP8L	2.91883	1.65708	2.71525	4.74863	3.13515	1.7385	3.6421	3.65955	2.34426	3.26081	3.81914	3.01363	1.08356	3.33688	0.97216	2.677	3.12546	2.96057	3.42559	2.66628	3.26355	3.55938	2.86566	3.29561	3.50712	3.4443	3.58119	2.84264	2.71579	2.67921	3.21214	3.62883	3.17337	3.72906	3.74028	2.89776	3.11952	3.33195	3.95126	2.94728	1.09109	3.6559
AKAP9	0.110118	0.0930014	0.166094	0.0689594	0.0468609	0.104827	0.109145	0.143056	0.20098	0.0413959	0.230646	0.0760701	0.0249047	0.100737	0.0230244	0.0618244	0.0563368	0.0846534	0.0304264	0.108653	0.142563	0.331779	0.0689296	0.0704641	0.211522	0.11433	0.104164	0.0464486	0.0618385	0.086482	0.0480116	0.344279	0.100974	0.126097	0.174767	0.105437	0.104856	0.0422991	0.238299	0.13166	0.0235306	0.0382075
AKR1A1	11.3499	12.1718	14.1317	15.048	11.0362	12.7698	15.5629	13.8147	17.2479	4.18204	18.9853	4.00966	3.09529	5.03783	2.96078	4.14505	4.85001	3.92666	4.06366	11.4063	13.8806	11.0434	13.6062	14.8467	14.6507	11.6403	14.2505	11.5772	14.8847	13.6676	12.4486	12.7924	7.79387	15.9345	15.669	14.2003	13.9071	3.92959	18.4938	12.6388	3.09154	12.5281
AKR1B1	17.5502	20.8002	43.3501	44.5931	30.6131	21.8222	21.5931	24.1732	26.2992	7.32154	24.4143	11.3234	7.82259	10.3585	8.04307	12.0314	7.39051	10.3177	9.4253	17.6292	22.0797	16.3712	20.2577	15.634	22.5022	16.4168	20.2266	18.7664	21.5535	19.7851	31.3648	17.0061	18.6902	21.8274	23.5246	43.45	49.4365	7.48128	25.259	48.8525	7.6402	50.732
AKR7A2	5.52431	2.67815	8.47716	7.86597	5.15656	2.80974	6.79294	6.549	6.98185	3.92252	7.0312	3.98213	3.17195	5.11244	3.20683	4.58696	4.57032	3.6989	5.31049	2.78912	5.94406	3.19115	5.3616	4.69715	4.63841	5.41729	5.8037	5.14286	5.31719	4.74095	5.05262	7.21273	6.12459	7.13162	8.09176	10.9469	9.37145	4.29262	6.87185	9.42495	3.27733	7.96597
ALCAM	7.33922	3.78215	5.36299	4.63836	2.96101	3.96798	3.59575	4.36935	6.27089	3.24634	4.83129	2.84651	1.24923	3.22875	2.72218	2.67458	2.55116	3.212	2.32545	7.06205	4.51407	4.3097	3.02216	4.75869	4.86732	4.94777	9.02154	4.45109	6.14453	6.711	3.03372	9.57469	3.60452	3.6816	5.38029	5.96678	4.36477	3.31717	4.99844	4.58574	2.71143	3.10126
ALDH16A1	1.33994	1.9629	2.69969	2.10735	1.56443	2.42683	1.24178	1.07819	2.09909	0.667745	2.40998	0.943724	0.371617	0.601762	0.707453	0.881796	0.499822	0.936696	0.600264	1.08273	1.26369	1.35159	1.66072	1.03104	1.26549	0.797953	0.58118	1.82061	1.4755	1.59645	1.60284	1.36653	1.17079	1.37672	1.38803	1.88943	2.22062	0.682314	2.49336	2.11637	0.723006	2.54545
ALDH18A1	28.3866	28.5645	47.8315	51.2825	16.1263	14.984	14.6383	17.6378	26.2282	38.8187	15.3279	37.2076	43.4748	41.4828	33.86	34.6961	40.7178	36.7433	35.6649	30.1464	36.8879	29.6277	25.4798	28.934	30.0201	37.0813	31.125	27.8749	24.5877	26.8515	32.1091	31.2077	27.891	29.8345	32.3894	55.8129	56.6645	79.3313	31.7164	63.4632	69.1416	61.915
ALDH1A2	5.36622	6.48193	3.64703	2.60032	4.76652	6.80041	6.11682	7.14561	3.77809	3.03927	8.06007	2.85877	2.37292	3.61544	4.10334	2.9398	2.91395	3.51296	2.81731	5.57515	7.33941	6.44003	3.04925	6.80771	5.17662	5.69885	7.62858	3.87034	5.32354	5.27636	4.88357	8.64962	4.84883	6.26287	8.5497	4.21677	5.09572	3.2974	8.33892	4.31437	4.19354	3.2523
ALDH1B1	14.1874	17.9941	20.1324	23.5042	10.974	18.8783	19.4221	20.0254	24.6097	32.2152	12.8703	34.7908	37.0525	31.5774	45.3185	44.1456	42.3396	39.1608	40.3045	20.4133	15.1809	14.5287	20.1971	20.7556	17.0583	19.6055	21.7015	17.6897	17.8362	19.5634	11.3687	14.7815	14.673	19.8858	18.4101	26.4003	16.2588	32.5821	13.3156	24.3189	46.3148	19.7474
ALDH1L2	1.09853	1.8263	2.39371	1.70076	1.00047	1.99503	0.977181	0.985163	3.63779	1.3979	1.87802	1.04231	1.47801	1.57365	1.65737	1.30535	1.40809	1.5978	1.28763	1.509	1.02854	1.57941	1.53215	1.01281	1.33161	1.35947	0.959134	1.11276	1.0174	0.931918	1.07642	1.06609	0.687438	1.13004	1.34231	1.90253	3.1312	1.3365	1.943	2.4855	1.64315	2.01801
ALDH2	10.4492	11.9245	23.7247	23.7455	11.0467	12.5104	10.7889	13.1796	24.2637	26.5442	14.8989	26.9436	12.9252	26.9163	29.3194	25.3056	26.8469	26.5686	29.7615	13.7322	16.7527	11.8651	13.0507	13.8897	17.6109	12.0936	12.1685	11.4861	12.5824	12.646	11.318	16.8072	18.5893	11.0465	11.5542	28.7346	27.714	27.1579	15.4144	33.1229	27.9144	21.7482
ALDH3A2	7.45115	5.55838	6.387	5.69176	6.73216	5.83149	8.68831	5.99414	4.78401	7.2424	9.14841	9.99744	8.50937	8.64748	11.8543	10.5759	9.46721	8.89001	9.34943	6.31678	5.98406	1.4789	5.34864	5.61184	3.61816	6.01256	6.65926	7.26355	5.43277	6.05045	6.65323	8.45645	6.09136	8.79037	6.3877	6.48605	7.28296	7.69302	9.46491	6.24378	12.1149	4.81666
ALDH5A1	1.58644	1.66604	5.41783	5.8357	1.43069	1.7479	1.42874	1.74776	4.63604	3.06338	1.62903	3.53472	2.86366	4.30308	3.24126	3.33724	2.67814	3.39615	2.73752	1.6177	1.75902	1.7112	2.94441	2.39252	1.59067	1.58791	2.07616	1.47634	1.16559	1.34226	1.46582	1.46697	1.28383	1.46285	1.8645	4.51081	4.70396	3.13021	1.68539	3.17561	3.31252	3.75644
ALDH6A1	1.87754	1.95728	5.76191	5.50933	2.80561	2.42194	1.78272	1.91247	4.53802	4.63964	1.6694	4.00507	4.34467	5.74372	2.94685	4.40712	3.63978	4.03876	4.47973	1.84868	1.948	1.46845	1.60739	1.19201	2.10826	1.62665	1.50699	1.92672	0.4636	1.02039	2.8745	1.97265	1.59179	1.82528	2.58011	4.72093	6.43641	4.59427	1.72716	3.92166	3.01164	5.83261
ALDH7A1	16.8602	18.9932	32.4089	35.8234	16.3249	20.0982	17.5241	23.5668	32.6922	17.7477	21.7928	13.8031	15.2483	15.5779	16.2469	15.8149	13.0431	18.1326	12.9554	19.3501	13.6669	22.4462	21.9388	22.25	27.9461	27.0551	20.7653	19.8613	19.6774	17.8135	16.7258	20.1748	19.7048	17.9425	22.0582	43.7521	43.0152	15.611	23.1445	34.2207	17.2988	29.8013
ALDH9A1	13.2376	13.0812	22.7101	18.971	15.1915	15.2435	12.0636	14.8723	12.3616	11.4953	11.3403	13.4687	7.60917	14.7995	15.4464	18.7154	16.2219	11.7167	9.70187	7.20391	16.1137	12.8946	14.3633	14.0905	11.7456	12.9385	10.4499	13.4607	12.8151	12.4179	15.7473	15.3001	12.7896	12.3517	13.6211	20.8199	18.0859	11.677	12.1863	20.0081	15.3624	21.6416
ALDOA	169.21	213.798	166.851	119.949	255.073	224.302	229.165	214.162	171.32	209.242	233.981	166.922	202.506	155.359	159.629	188.044	186.314	191.235	170.24	198.159	173.492	292.002	225.699	216.129	188.759	199.644	170.685	227.062	217.839	223.274	261.337	200.778	203.943	231.218	196.869	182.664	159.381	214.058	242.076	187.602	163.138	228.322
ALDOC	8.25555	8.57055	6.56153	5.53761	6.46131	8.99166	9.72886	6.69794	7.20042	4.69288	8.69093	3.34591	0.411519	4.82878	3.7041	4.98285	4.60875	7.5771	5.48271	11.2973	6.58694	11.5721	12.598	19.3108	7.08495	10.403	11.4731	8.04339	6.93196	7.6978	6.61997	13.2813	11.8853	9.96115	9.76548	8.13723	7.72353	5.14353	8.9916	6.20107	2.99718	6.6129
ALG1	1.07893	1.61705	0.942846	1.12395	0.832702	1.6965	1.79625	0.938861	0.636132	2.76285	0.838467	3.54333	3.69962	1.87986	2.51088	2.18019	2.74088	2.15549	2.5981	1.70291	1.28881	1.69952	0.94436	1.34929	0.870988	1.12976	1.19359	0.88887	0.850186	1.26582	0.85315	1.68874	1.10369	1.68356	0.857961	0.273186	1.86138	2.82313	1.23473	0.905648	2.56608	1.38686
ALG5	4.60417	0.853027	1.2806	2.39138	1.80011	0.894941	4.88064	2.56441	1.8171	4.66813	5.78347	3.48373	1.54306	3.73259	1.79311	3.04501	4.62138	4.28094	4.67455	3.58111	3.21757	3.72657	1.82063	1.72732	2.7646	1.74108	1.91925	4.3226	1.31784	3.18726	1.84432	3.00954	2.0869	4.99717	5.89943	1.78659	2.10084	4.76998	5.98356	2.36639	1.83253	1.67113
ALG6	0.481215	0.284092	1.60344	1.61846	0.887276	0.29805	0.726541	0.994103	0.433708	0.265579	0.35449	0.600463	0.386899	0.55349	0.259586	0.560783	0.492467	0.480648	0.394267	0.40586	0.72752	0.317663	0.287946	0.342047	0.471828	0.390493	0.364015	0.992627	0.325934	0.31119	0.909064	0.563394	0.260812	0.743888	0.373448	1.47518	1.4208	0.271373	0.366754	0.995612	0.265293	1.07594
ALG9	0.904151	0.737715	0.760158	0.657611	3.9677	0.773963	1.33984	0.446077	0.274042	1.31674	1.14934	0.901976	0.591839	1.31215	0.235233	1.19829	0.800482	1.36832	1.11255	0.359006	0.0970729	0.322936	0.769583	0.298259	0.563444	0.54416	0.221178	0.92901	0.821131	0.677653	0.485146	0.686549	0.466334	0.89472	0.771336	0.219675	0.23705	0.877448	0.775497	0.550785	0.156784	0.140312
ALKBH5	5.22126	7.49439	5.43866	6.3405	4.70812	8.69388	1.95623	7.86781	5.03735	3.14367	6.60346	3.70177	4.29185	2.84094	4.58064	3.0277	1.03479	2.5484	3.45823	9.13738	5.46767	7.23473	5.45298	7.51202	6.10914	7.44256	6.16499	8.39051	7.35298	7.65628	4.82374	7.47102	6.21454	2.00293	7.11943	6.12012	7.71042	3.21226	6.83192	7.87779	4.68135	6.94721
ALYREF	65.1336	31.557	39.2136	42.3653	73.686	33.4097	57.1965	58.9386	69.1795	54.7159	52.7093	84.9352	30.4993	59.6111	74.4669	70.5744	47.1293	89.4484	83.998	56.1699	91.2243	59.7702	62.5181	62.0427	72.1223	78.4673	67.3724	68.853	64.4858	59.9083	75.4955	85.662	69.4902	57.0296	62.3316	37.36	36.2456	55.9097	54.5329	37.3003	76.1039	25.0327
AMOT	15.4586	14.7567	14.0673	14.3403	20.7756	15.4818	20.2122	18.299	13.5213	57.2254	23.04	59.6476	44.71	54.4232	65.2036	53.08	61.3387	59.682	54.1712	14.7262	16.1116	19.1642	17.7907	16.1243	22.0217	18.1971	17.2173	15.0061	14.7612	15.64	21.2012	19.5009	18.778	20.4741	24.2968	15.0002	14.6014	58.5806	23.8279	16.2823	64.0137	16.7366
AMPD2	2.78945	2.13367	2.80529	2.99177	1.92838	2.21607	2.19967	1.97151	1.92573	0.550339	2.74756	1.26463	1.08389	0.998353	0.562276	0.729469	1.23557	1.47206	1.05038	3.27444	2.34489	1.61229	2.90655	1.5736	2.6019	2.96955	2.07559	1.88617	1.70965	1.68531	1.97573	2.7193	3.13694	2.25219	2.94618	2.68253	2.50659	0.562346	2.84262	2.48183	0.574637	2.36967
ANAPC1	0.746193	0.996412	0.808551	0.83624	0.531016	1.00507	0.983178	0.880498	0.701254	0.477828	0.604676	0.683744	0.398804	0.638139	0.57823	0.568376	0.623892	0.604714	0.593403	0.442557	0.758672	0.487765	0.612661	0.46071	0.469625	0.547768	0.51352	0.504095	0.503677	0.747939	0.544056	0.843537	0.606323	0.976284	0.923465	0.780243	0.778558	0.488254	0.670033	0.53854	0.550208	0.565602
ANAPC2	0.0730619	0.208993	0.230449	0.311796	0.229263	0.219262	0.246824	0.369809	0.698397	0.457639	0.497423	1.10776	0.0679011	0.451085	0.228654	0.0745673	0.205901	0.143648	0.403102	0.485213	0.189169	0.376811	0.723373	0.0766932	0.261375	0.145769	0.234288	0.512996	0.244868	0.302473	0.234893	0.212416	0.0415422	0.223452	0.332142	0.320826	0.246218	0.516132	0.514633	0.0847826	0.233681	0.396086
ANAPC4	1.06197	1.13959	0.685142	0.689272	0.0999422	1.19559	0.844762	1.20765	0.752452	0.447164	0.764308	0.179509	0.804594	0.338212	0.250705	0.31857	0.875377	0.580452	0.0784316	0.917137	0.6202	0.499562	0.532307	0.719309	0.626617	0.997422	0.79876	1.12552	0.626011	0.490112	0.102396	0.650211	0.532519	0.864932	0.697268	0.926787	0.784949	0.45692	0.79075	0.683457	0.256216	0.576956
ANAPC5	0.515882	0.787036	0.90948	0.752285	0.418742	0.825706	0.607566	0.476051	1.17315	0.3318	0.762473	0.395974	0.616161	0.332223	0.468174	0.447618	0.428786	0.343338	0.383637	0.604915	0.581544	0.130084	0.490135	0.618599	0.349655	0.396611	0.462435	0.737989	0.931034	0.707089	0.454271	0.942863	0.544292	0.589181	0.701145	1.00059	0.693219	0.33904	0.788852	0.446529	0.54939	0.723438
ANAPC7	1.51293	0.797887	2.55752	1.92453	2.86858	0.837091	1.18237	1.44405	1.35058	1.19248	1.50185	2.67525	1.40865	1.51534	2.03434	1.67375	1.22168	2.32746	2.08404	1.83945	3.52757	1.46435	1.46174	1.34151	1.29271	1.41944	1.1815	1.28997	1.21649	0.941697	2.93902	2.9565	1.91423	1.21061	1.39793	2.53347	2.07957	1.2185	1.68245	3.02524	2.07907	4.07811
ANK3	0.374743	0.415764	1.82488	0.664842	0.5119	0.436192	0.785992	0.814731	1.46734	0.220524	1.11153	0.330197	0.166323	0.245267	0.200838	0.360206	0.140196	0.163109	0.0561879	0.216389	0.286341	0.229951	0.273036	0.270515	0.226535	0.209325	0.153221	0.344104	0.240221	0.384152	0.178236	0.266388	0.270544	0.497087	0.424908	0.234955	0.218503	0.112668	0.52495	0.313221	0.102627	0.208133
ANKFY1	1.36522	2.66632	1.05762	1.87666	1.0019	2.58945	1.56351	2.4912	4.82653	1.59864	2.54185	1.57032	2.00254	2.07899	0.995834	1.51357	1.37447	1.47098	1.16435	1.68696	1.99671	2.42331	1.96889	2.22401	2.28784	2.54055	1.46544	3.64563	3.92742	2.91986	1.21552	1.68666	1.55832	1.71302	1.85713	1.62179	2.01411	1.67189	2.62979	2.67168	1.01773	1.10566
ANKHD1	1.39404	0.433284	0.206199	0.33853	0.386628	0.454573	0.704336	0.5207	0.63499	0.552044	0.70679	0.407857	0.296549	0.552265	0.324302	0.565562	0.402009	0.493388	0.379427	1.57797	1.80976	1.41464	1.42657	1.07309	1.83748	1.34802	1.21041	1.17237	1.14403	1.27815	0.969202	2.19867	1.77099	1.70157	1.77527	0.869554	0.92888	1.33084	1.98719	0.849739	1.12576	0.515142
ANKLE2	0.740313	2.99472	0.501435	0.670974	0.731156	3.14186	0.702212	1.21575	0.851011	1.75829	1.06601	1.53706	0.904316	1.47634	0.946381	1.59944	1.3706	1.7268	1.26258	0.531563	0.697148	0.870083	0.857678	0.648879	0.864457	0.428714	0.895712	0.552377	4.68645	0.745892	0.783488	0.970532	0.756246	0.573332	0.794459	0.483187	0.443772	1.63403	1.10289	0.557691	0.827581	0.190094
ANKRD17	0.558371	1.3037	0.86647	0.855374	0.81561	1.36776	1.89772	1.5332	1.5867	1.69663	2.1272	1.67374	1.14018	2.16089	1.17501	1.96825	1.71674	1.95986	1.36945	0.532809	0.312186	0.481208	0.684147	0.669623	0.885609	0.658116	0.555996	0.456098	0.563911	0.946538	0.293119	1.21136	0.549691	0.947326	1.42247	0.306912	0.43489	1.02265	1.53869	0.228397	0.523952	0.187293
ANKRD28	1.22379	0.960966	0.788851	1.16099	0.781876	1.00818	1.5336	1.44717	1.4455	0.271486	1.5321	0.572082	0.428324	0.684247	0.155528	0.80894	0.306524	0.422591	0.460643	0.578109	0.772485	1.05692	0.944124	0.493015	1.65495	0.783706	0.897124	0.926069	1.26753	0.912418	0.801076	1.12675	0.865154	1.57022	1.24676	1.03299	0.775869	0.151831	1.5851	0.801192	0.158947	1.36852
ANKZF1	0.634801	0.676337	0.477552	0.24142	0.199757	0.709568	0.625475	0.240484	0.851093	0.527265	0.821003	0.293001	0.302195	0.491106	0.0899308	0.257787	0.523995	0.444392	0.606848	0.639415	0.208371	0.436193	1.22187	0.667243	0.773755	0.738034	0.368366	0.616278	0.686484	0.387635	0.204662	0.57235	0.581117	0.64041	0.782787	0.179215	0.496569	0.538769	0.849407	0.14405	0.0919079	0.51162
ANLN	0.320758	0.178053	1.3497	1.92123	0.358824	0.286189	0.538309	0.369674	0.857622	0.192334	0.757917	0.57173	0.0843685	0.415482	0.0797257	0.192054	0.149908	0.44825	0.262983	0.40642	0.42063	0.409947	0.777139	0.284181	0.275416	0.0676442	0.489353	0.460747	0.329072	0.393853	0.367635	0.453817	0.595702	0.647736	0.438109	1.66174	1.37771	0.196531	0.658184	1.27678	0.0814784	2.12812
ANP32A	153.939	143.97	174.051	142.45	154.089	150.943	117.451	114.397	131.565	67.0789	114.681	71.4049	68.8846	73.9394	89.4243	83.1257	79.6221	86.3049	78.8999	103.487	157.744	174.34	128.092	111.616	143.943	122.792	119.915	133.193	142.776	145.214	156.536	167.785	148.676	120.256	118.998	121.673	115.312	68.5424	118.649	137.132	91.1403	163.301
ANP32B	58.2286	59.1152	55.5852	52.21	61.5441	62.0198	71.5941	75.4454	50.9987	52.3221	62.2589	68.9088	69.2654	61.8579	58.1531	49.7711	60.009	50.7002	54.4013	54.6169	42.7902	47.7988	63.2501	57.7603	57.2397	79.845	53.6368	71.8118	60.5914	55.0993	59.7351	50.9649	40.2499	73.3035	59.264	54.0356	45.779	53.4637	64.4129	54.5724	59.4315	50.6543
ANP32E	58.408	83.6046	104.798	86.7439	53.6541	87.7124	50.7246	64.381	130.986	33.6182	70.8056	36.4858	52.2748	40.6991	46.6497	36.7201	38.4615	42.0563	38.123	89.0738	58.2233	64.8207	53.8903	86.6128	72.7251	76.0517	76.7115	83.5388	82.1489	91.1414	55.6759	84.2182	55.9886	51.9357	74.6159	85.0261	123.599	38.0027	73.2552	94.4886	47.6752	101
ANXA1	5.52167	7.72516	11.395	10.959	5.85553	8.10473	6.35217	5.72746	12.262	1.39833	7.55449	0.66023	0.883934	0.785998	0.933103	0.951984	0.707783	0.892954	0.853523	8.8973	5.47941	9.12646	8.89954	7.29239	9.71493	8.39076	7.82354	6.78699	6.07105	7.54353	5.99931	7.47626	8.08546	6.50383	8.86647	11.0051	13.949	1.42884	6.8162	11.7691	0.953616	10.137
ANXA11	9.85032	11.4544	11.9635	10.5794	6.88344	11.6754	7.86575	8.48702	12.0563	11.0456	8.75483	9.56424	5.20463	11.7825	11.5034	11.1573	13.8441	12.529	12.8485	12.0728	8.56067	6.4512	9.75239	10.0935	9.11927	8.66186	9.17939	9.26866	9.44955	10.1625	7.05246	10.3462	10.1198	8.05356	7.27155	9.307	12.0635	11.1153	9.05772	11.461	12.4746	10.2075
ANXA2	28.708	26.2807	47.0098	44.7629	33.9828	27.987	22.5356	28.4787	35.9797	30.8611	20.8468	25.7358	22.9908	26.2182	21.0726	31.5676	27.8508	26.6439	28.7703	28.8089	33.7424	22.5863	26.4168	25.1266	26.6489	22.2788	24.1446	25.6422	24.9455	20.582	34.8172	24.5597	22.2433	23.0737	24.0324	47.4077	51.1688	29.4995	21.333	49.5076	21.5359	41.7151
ANXA4	1.32416	0.496778	2.24906	3.21401	2.31429	0.521187	0.509629	1.0264	1.80486	1.28458	1.23514	1.19805	1.6299	1.75542	1.3283	0.419195	1.39475	1.79228	1.23819	1.81273	1.71021	0.899114	1.65732	1.50809	1.75684	0.874656	1.03452	1.30608	1.53814	1.07741	2.37112	1.55584	1.75248	0.521797	1.2633	4.03358	4.32168	0.489129	1.27787	4.25197	1.35751	2.00771
ANXA5	49.0908	57.8819	59.6519	57.9481	29.7608	61.5672	54.3973	49.2936	80.5102	32.88	44.5493	29.1303	41.2314	20.4923	32.2405	33.1694	28.3148	29.1957	30.3791	44.12	46.989	47.6286	43.8103	49.0537	45.3291	49.6267	45.1962	58.6045	62.6965	65.1128	32.9962	50.7344	38.6359	55.6962	44.1838	48.3278	61.2807	33.5974	48.6496	44.4905	32.9493	42.2742
ANXA6	13.2906	14.4938	16.9212	16.5734	16.1398	17.8038	14.7371	16.5869	15.6001	17.7527	14.2193	18.4036	12.94	18.3041	14.9432	16.744	17.9874	18.7575	15.6452	14.175	16.5856	19.1309	11.8458	15.8609	14.031	13.4381	15.3382	11.8076	13.1077	11.3929	16.5361	16.4836	14.0654	14.3256	14.5945	14.2531	14.9474	18.1401	14.7113	16.3157	15.2717	24.0652
ANXA7	4.77206	5.49767	7.59862	7.80219	7.63735	5.7678	5.57475	5.60221	5.529	3.17461	6.07656	4.97326	3.45044	4.475	3.72033	2.09246	2.13904	3.96613	4.10224	5.11417	8.11851	4.81942	5.35453	5.65235	6.86441	5.9174	5.76113	5.91834	5.23656	5.03394	7.82489	8.14275	5.03918	5.70785	2.18865	7.12727	5.87957	3.24388	5.97806	8.35136	3.07697	7.46671
AP1B1	91.4893	40.1267	28.6676	27.9895	44.4044	65.8106	53.9768	48.4484	65.5374	29.2529	57.1514	29.218	30.4234	35.6193	31.9516	31.3287	31.8052	34.8458	23.9113	44.6978	61.0056	55.4549	39.5558	36.6664	42.5473	51.8393	38.744	48.6009	54.4186	51.5456	46.2751	48.3317	40.6816	55.3984	56.4846	47.3781	71.7054	33.7197	59.3015	60.6582	33.1189	42.9267
AP1G1	4.66846	2.63011	6.1829	4.9814	3.42654	2.75933	3.26	1.8811	3.87979	1.40783	4.00675	2.0877	1.52236	1.52811	3.55826	2.34288	2.56505	2.05646	1.76024	3.33726	4.0154	3.44292	2.25665	2.11194	4.05988	3.49632	3.53278	1.96544	2.74856	3.78682	3.24939	4.10512	3.17432	3.00428	3.75555	6.22168	3.22674	1.15822	3.69497	5.86986	3.67179	4.78829
AP1M1	6.5657	5.21528	4.15356	6.8453	6.91822	6.54928	7.1949	5.08505	4.41233	4.24608	7.38808	6.54571	4.8874	4.48214	4.4006	5.57476	4.83241	4.71033	5.32452	4.00166	5.50605	5.93998	5.42134	4.56128	7.33886	5.37258	5.27025	4.4063	5.089	4.71655	7.0881	7.30576	8.33147	7.36669	6.53086	4.83678	9.35426	4.33872	6.5694	7.89303	4.29731	6.01716
AP2A1	6.17238	4.11593	4.27242	2.83532	4.24252	6.38679	5.86293	5.39583	4.60176	4.07239	6.08789	2.37817	3.81584	3.90933	3.36429	3.1967	3.63544	3.99974	2.50183	5.71506	4.75085	6.42	5.75572	5.39831	6.26836	7.01591	4.99091	5.02178	5.74019	5.98434	4.3467	6.35199	5.27001	5.87646	6.58607	6.14324	6.61515	4.16124	5.82965	6.1786	3.65005	4.29535
AP2A2	12.8673	50.9472	60.8505	45.4198	10.2813	15.244	17.0106	12.6883	22.3187	12.0014	16.0333	5.70862	14.8958	10.3701	8.84396	6.13901	7.93553	12.8602	9.88722	16.2305	18.8045	7.33333	17.0758	10.9729	12.5131	14.9599	11.7585	14.7717	14.1853	12.8561	10.5338	12.7899	7.69015	17.838	14.1946	17.53	19.6344	11.3681	16.588	17.592	8.71834	19.0285
AP2B1	5.82031	13.6035	15.9498	12.0525	5.09531	8.92797	6.73443	7.12799	8.9639	2.04674	8.4644	3.71498	3.75045	3.89475	3.98776	3.9264	4.74142	3.71669	3.16167	3.63805	6.70199	2.95706	3.34812	5.02669	2.44577	5.14985	4.39982	4.7872	6.44163	5.75608	5.22043	5.35329	2.88749	6.89522	7.20887	6.93361	5.63515	2.09139	8.75724	6.69154	4.18234	5.93071
AP2M1	3.11466	2.42527	3.92455	4.81126	5.54532	2.54444	4.99328	4.91316	5.15128	2.90941	5.0315	3.16452	1.96993	3.34154	2.14312	1.81712	2.08348	2.04007	2.97167	4.71909	4.834	4.52711	4.79113	5.00467	4.65554	4.99142	4.46198	3.9639	3.72068	5.20631	5.68149	3.94837	4.19089	5.49502	4.83028	6.26628	5.37001	2.29342	5.50383	6.67642	1.38519	4.21171
AP2S1	3.81457	2.81713	11.3985	11.3994	5.09022	2.45115	4.31676	4.96596	4.8027	3.6394	3.74675	4.25418	3.71187	3.87138	3.78732	2.46216	5.00011	3.92348	4.05305	2.02552	1.69704	2.82375	1.18917	3.11669	4.38863	4.0963	2.88499	3.02351	2.90247	3.10049	5.21521	7.03649	1.96301	4.41983	2.04843	8.48268	9.6248	3.71881	3.87637	10.4398	3.87059	12.0611
AP3B1	2.97205	3.25405	2.25415	2.01575	1.51225	3.37081	2.50949	1.97429	2.93492	2.22589	2.60519	2.59219	3.039	2.13076	2.88282	1.57082	2.27099	2.39467	1.28632	1.87107	3.64332	2.53477	1.84604	1.236	3.44116	1.84251	1.2569	2.02333	1.65122	1.6907	1.49478	3.06843	2.03124	2.5694	2.05876	1.66692	1.42972	2.14124	2.61761	2.46626	2.94619	2.14718
AP3D1	4.51742	5.65494	4.30679	3.91977	3.94476	5.9358	5.44273	5.92278	7.13333	3.35772	7.40137	3.52749	1.78383	3.56532	3.0758	3.87562	3.70157	2.91033	4.36086	3.46653	3.48878	3.72723	4.30379	4.07759	4.04996	5.99609	4.69047	5.64694	5.67565	5.27853	3.89478	5.29243	4.17962	5.57269	5.80462	3.83373	5.95142	3.43098	7.65743	4.37709	3.04548	3.74578
AP3M1	3.36548	4.35017	3.43375	3.20095	1.78962	4.56391	2.61346	4.51989	3.24261	2.05976	3.25617	2.72705	3.37477	2.82899	3.3916	2.59347	2.74041	2.40837	2.73516	2.54582	1.94253	2.86346	3.31732	3.06301	2.69516	3.10889	2.29843	1.94437	2.43557	2.59755	1.83357	3.39519	2.18469	2.67586	3.79253	2.50689	4.51894	2.27519	3.36882	3.38625	3.7258	2.98528
APBB1	1.1444	0.727545	1.09335	0.259932	0.956543	0.763293	1.16949	0.939957	1.21804	0.318763	1.23154	0.228531	0.244792	0.465212	0.435531	0.375489	0.480645	0.265578	0.375682	1.28966	0.729991	1.14889	1.08556	0.985538	1.3146	0.335149	1.19593	0.943643	0.697645	0.898802	0.980032	1.0557	1.2239	1.19741	0.747865	0.589798	0.886553	0.325718	1.43977	0.765302	0.445106	0.410918
APEH	4.79137	4.76235	7.51638	6.96341	2.84362	4.99634	4.48265	4.72247	7.84772	2.70169	5.43102	1.55472	1.41817	2.64482	2.69893	2.54908	2.56836	2.71731	2.12769	4.89396	4.48106	5.56724	6.0073	5.26815	6.04641	3.9567	6.24975	5.57273	5.87345	5.66459	3.19624	3.70829	3.37631	4.42066	5.33109	8.72257	7.53344	2.62727	5.61892	3.79832	2.69518	6.64072
APEX1	65.1777	64.6807	51.1522	53.2452	59.1505	67.8587	62.6229	71.0319	92.316	65.7356	59.8766	79.4023	49.225	72.9408	55.9305	76.491	62.9969	100.818	83.8838	81.8729	54.2584	87.2318	81.9865	54.7932	76.6348	62.9176	80.7538	73.2466	64.5732	69.1191	54.3311	68.1522	77.1353	64.2932	68.0971	67.7126	71.7177	67.1698	61.9481	57.711	45.2827	50.2812
API5	130.993	115.778	154.533	137.582	49.0955	60.4752	51.0553	45.5267	55.5332	51.7141	50.9876	53.7778	45.8988	60.056	47.1584	53.2166	58.4826	51.4848	47.3557	60.3709	56.2373	47.4897	59.5008	64.8584	55.225	49.7443	58.1256	58.5039	57.5171	59.0425	50.3011	72.6043	57.6738	52.3821	48.6336	73.0946	67.7531	52.8425	52.8537	90.7441	48.1952	66.1624
APIP	1.78766	2.33385	4.14978	3.44524	1.16802	2.44852	1.75719	1.30869	0.355577	0.70854	1.4785	1.15196	0.359812	1.02683	0.696466	0.605645	1.06139	0.524116	0.75825	0.10189	1.24891	0.503032	1.35347	0.998142	2.57498	1.45874	0.402837	1.39462	1.66089	0.767616	1.1967	2.57779	2.61323	1.66954	2.0439	3.40556	4.67642	0.724	1.52965	4.09104	0.711777	2.65231
APMAP	15.3783	16.8397	13.6579	14.0344	11.6682	16.8358	9.53761	9.76898	7.58067	30.087	9.42999	31.4623	21.2771	32.7226	25.3577	31.8376	38.4947	28.984	26.4762	7.52863	15.109	10.0148	9.01347	8.72696	9.82121	9.74626	9.76934	10.051	14.3257	12.7754	11.9547	17.1763	19.8496	9.76533	12.8763	17.2253	20.4188	30.7434	9.75623	17.3278	24.8047	10.7025
APOA1BP	28.9188	38.2529	22.4255	22.7196	26.158	40.1325	27.2457	27.7534	39.6001	19.7637	30.5014	16.5042	18.1347	21.8629	18.8588	19.0761	15.8928	21.9323	21.6048	25.8766	25.9727	39.3396	28.7693	42.4511	23.2764	30.5007	30.2683	27.764	31.38	32.1462	27.6175	41.358	35.9704	27.8962	29.9369	23.3808	30.7676	20.1949	31.5567	12.056	19.2734	14.836
APOOL	2.44807	2.1565	1.39951	2.88696	2.69826	2.01722	2.46378	1.76251	2.50635	6.63342	2.79755	6.59915	3.17559	6.67617	5.54107	3.84861	8.77587	5.50827	7.42358	1.22823	1.18733	1.81331	2.17655	0.7385	2.64209	1.47191	2.00495	1.95823	1.43199	1.56199	2.76452	3.23003	3.10288	2.52261	2.44158	2.02393	1.75867	6.93702	2.89433	2.00048	6.04524	1.41297
APPL1	3.44928	2.16068	2.66845	3.06201	1.60131	2.11225	3.15051	2.54172	3.76618	1.79981	4.63913	1.54328	0.776216	1.79314	0.824955	1.44168	1.93914	2.11034	1.9801	2.62109	2.6399	2.73465	3.06406	2.69414	3.61687	2.38955	2.76463	2.43535	2.42068	2.04876	1.64063	2.26874	2.84892	3.22574	3.37199	1.39164	3.7568	1.83908	4.79962	2.51542	0.843091	1.72967
APRT	59.837	56.6235	63.6275	72.9985	49.4554	59.4057	55.3674	51.467	64.7697	34.6313	42.136	27.4227	37.617	33.1066	33.1868	29.8929	25.5179	30.0336	29.8749	76.7343	55.0169	68.8451	50.1074	66.4845	60.03	66.4077	75.182	55.4123	58.949	59.5305	50.6698	60.0761	53.7017	53.3919	52.5166	84.3991	76.3549	35.3869	52.5362	87.2683	34.0262	47.6011
APTX	0.843403	0.774882	0.526685	0.36545	0.584563	0.812955	1.65808	0.763621	15.6972	1.36523	1.5307	0.708265	0.385293	0.740258	0.465959	0.469822	0.806559	0.69994	0.750801	1.2606	0.0650258	0.985775	0.823635	1.2927	0.801658	1.03334	1.40985	1.04649	0.93578	0.892505	0.598918	0.173891	1.04223	1.69767	1.04361	0.646658	0.479863	1.23019	1.58366	0.423518	0.476203	0.111785
AQR	1.61702	1.8373	3.37276	3.29132	1.55206	1.92757	1.68045	1.82391	1.69525	1.54101	1.61119	1.31983	1.78383	1.23423	1.07012	1.50815	1.62385	1.73898	1.3936	0.961431	1.07269	1.61867	2.95973	3.2734	1.34423	1.3274	1.24716	1.74204	1.51897	1.9242	1.50568	1.63045	2.14482	1.74007	1.02387	2.78709	4.46318	1.62661	1.83236	3.09976	1.09365	2.25305
ARAP1	0.127799	0.35172	0.048955	0.127703	0.259091	0.369002	0.16734	0.275468	0.591594	0.0507529	0.246598	0.258169	0.12414	0.241052	0.181735	0.0706544	0.194284	0.0888108	0.0725021	0.468887	0.311082	0.463389	0.138312	0.318098	0.395914	0.0747263	0.305697	0.38897	0.308021	0.105374	0.265453	0.21868	0.235819	0.109004	0.298274	0.16156	0.127754	0.0518602	0.274396	0.0557736	0.18573	0.0525684
ARCN1	9.97577	9.85752	11.0359	7.90516	9.04893	10.3419	8.60808	12.0326	9.40952	7.4122	10.0893	9.11659	7.26098	9.91364	8.67049	7.3107	7.72348	6.98218	10.0918	7.3613	14.7758	12.6615	6.22034	9.48298	11.5049	10.3922	10.1346	8.72169	9.19972	10.5382	9.27113	12.3343	8.48266	8.81361	9.78718	11.2499	15.1502	7.46217	10.1955	10.149	9.09363	17.5415
ARF1	75.3437	54.1354	134.348	114.57	76.6134	56.7953	81.3075	58.2799	83.6076	67.6019	71.4826	79.7733	49.6505	63.1068	66.8977	52.8204	50.8622	57.449	65.2412	58.7105	63.3032	47.3467	64.2413	71.1798	59.2274	72.5303	58.2989	72.5653	62.3886	66.3092	78.4947	63.8138	38.9729	83.2488	58.339	153.251	139.193	69.0769	73.9557	126.933	68.3684	123.113
ARF4	5.94273	1.82451	19.7792	20.9206	13.6892	1.91416	4.84206	5.94792	6.30052	2.29683	5.40324	13.4793	1.03944	6.09757	8.23211	4.77965	5.17563	12.9633	10.3447	2.63788	12.3696	3.43174	3.79777	2.01323	5.06867	5.95008	4.67163	2.8806	4.3967	4.29921	14.0254	11.9938	5.72192	4.95767	5.21711	24.9352	15.8555	2.34694	5.59018	23.5315	7.84886	17.8911
ARF6	11.5597	8.33333	13.0485	13.8208	6.25471	7.27924	12.921	8.78305	4.38368	9.69946	7.70762	8.69094	1.39529	7.999	6.16432	8.11689	5.841	7.528	3.7423	8.80035	5.95996	12.3944	9.64907	5.16865	12.8039	15.6775	8.74069	11.0022	12.0126	7.24287	6.4083	12.9122	12.1452	10.0748	8.45478	13.2784	11.7439	9.91108	7.97428	5.78834	6.29984	8.55566
ARFGAP1	0.904141	2.59485	1.74158	1.8815	1.25655	2.72235	1.39981	2.21187	1.20833	3.32743	1.72673	3.16176	3.69415	2.43021	2.91144	4.66288	3.00526	2.82673	1.08424	2.07043	1.98436	1.2515	1.86169	1.2082	1.85552	1.5608	1.51801	1.49116	0.230509	1.33114	1.28741	1.49982	2.00858	1.43323	2.6391	2.03431	1.90402	3.40003	1.78647	1.76381	2.97544	2.31393
ARFGAP2	1.66171	1.44448	0.659111	0.69887	1.60866	1.45715	1.7935	1.40686	1.94393	1.03995	1.64112	1.95133	1.21333	2.4133	2.10759	1.49109	2.60972	2.24941	2.43795	1.91248	0.555101	1.04492	2.15316	1.18303	1.16613	1.62223	0.733925	0.573975	1.17811	0.870329	1.36951	1.3405	2.18279	1.83632	1.77738	0.906902	0.734158	1.06264	1.47231	0.492184	2.04668	0.473879
ARFGAP3	0.904014	1.41544	1.32136	1.17313	1.18159	1.59921	1.72461	0.3488	1.17046	0.908933	1.11182	1.06142	1.27196	0.68357	0.251121	1.2633	1.49955	0.843346	0.563054	2.53547	1.73978	1.42412	1.33762	1.02097	0.946683	0.919883	1.40718	1.73675	1.53941	1.32573	1.2106	1.27875	0.850913	1.5362	1.6299	1.29153	1.36228	0.928764	1.2164	1.90405	0.363985	1.28704
ARFIP1	20.1186	24.1346	16.2139	7.78451	15.691	24.3066	24.9247	27.0364	29.3202	22.0304	28.2302	18.665	13.034	24.3528	19.4884	18.9657	27.1767	18.6283	12.2193	17.5926	16.5109	35.9277	32.8591	30.3996	29.6961	25.9532	19.4377	27.8391	23.5666	18.1541	16.0763	26.3209	26.8389	25.5198	40.4126	14.3313	11.4378	22.511	25.7215	11.2873	20.8008	19.3557
ARFIP2	1.77708	1.67525	1.65828	0.553884	2.07643	1.56222	1.42233	1.17729	0.719471	1.53633	1.27216	3.35893	2.44329	2.62941	1.14837	1.81284	1.26532	2.0022	1.86882	1.18736	1.51192	1.16534	1.36614	1.51001	1.62519	2.02352	1.61364	1.2675	1.53806	0.923024	2.39332	1.32199	0.633832	1.63826	1.2003	0.801856	0.25866	0.820692	1.48069	0.835414	1.3203	2.68095
ARG2	2.82748	2.00246	3.47747	2.79151	2.05387	2.10085	2.36475	2.50419	7.51431	9.96567	3.26104	8.95186	8.85706	9.89862	8.98486	10.8638	8.82559	9.55124	11.6354	2.76044	2.39705	1.98633	2.66002	3.34438	3.47877	3.17032	3.47231	2.99864	2.64012	2.16229	2.1043	3.3375	1.96787	2.42121	2.97558	2.68863	2.95885	10.1831	2.86376	3.21498	9.18239	3.03396
ARHGAP1	2.64322	4.43824	5.60661	3.0126	3.653	3.38974	3.54234	3.36377	4.01837	1.58518	3.70404	2.20043	0.847559	3.26798	2.63764	2.42585	3.3458	2.49994	1.9788	1.34049	0.780587	2.49973	1.73733	3.85953	1.63421	3.38522	3.03587	2.6018	2.24035	2.1436	3.79463	3.47891	1.49543	3.62692	4.0187	4.94581	5.62765	1.61977	3.83218	5.65199	2.69563	4.3285
ARHGAP17	3.55415	3.07395	2.47766	2.8108	2.83282	3.22499	3.25392	3.5182	4.08962	2.45397	5.60123	2.78056	3.07907	1.37174	1.86833	2.72115	1.46877	2.45479	1.92071	3.53158	2.0674	2.89382	3.19078	3.83141	3.14423	3.06235	4.64413	2.9009	3.55783	4.02235	2.96045	4.25297	2.9092	3.18583	4.03366	2.71111	2.84358	2.57757	4.36009	3.2172	1.90941	2.43778
ARHGAP35	0.22544	0.198286	0.258728	0.253469	0.144756	0.313923	0.334841	0.244903	0.0759381	0.13412	0.202875	0.147858	0.13594	0.192036	0.176285	0.174985	0.124583	0.193984	0.115962	0.19371	0.156883	0.167483	0.174322	0.114085	0.215451	0.133322	0.0791376	0.192236	0.137356	0.21257	0.14831	0.282489	0.0771294	0.29676	0.211775	0.180398	0.206502	0.275953	0.209894	0.173545	0.18016	0.128876
ARHGDIA	103.806	103.355	54.9746	65.4191	91.8911	108.434	150.824	124.037	162.049	97.268	147.787	64.8724	18.1363	73.4164	12.0681	75.7892	65.6351	66.9397	79.1691	160.441	126.562	166.565	196.064	166.44	158.873	113.109	167.452	179.046	171.082	159.837	94.1475	125.579	154.729	154.425	169.764	89.3916	91.0543	99.3902	152.775	70.411	12.3334	74.7249
ARHGEF1	0.586138	0.562232	0.466927	1.18612	3.86928	0.594709	0.817127	1.26213	0.988534	0.598811	1.2764	1.75975	0.490661	0.59817	0.449665	0.620621	0.887373	1.67164	0.54407	0.594366	3.03436	0.522303	0.866816	0.376574	1.00979	0.778399	0.505947	0.889003	0.946981	0.986265	0.587658	0.778007	0.683581	0.836637	1.16554	0.546817	0.632268	0.611876	1.35211	0.286709	0.508376	0.517798
ARHGEF2	1.628	1.6915	1.63509	2.07884	1.44741	1.61262	1.70735	1.5714	1.59274	0.824393	2.32032	1.00936	0.988076	0.72275	0.592759	0.632977	1.3249	0.683297	0.527264	1.35151	1.07097	1.37922	1.40075	1.34554	1.54854	1.47204	1.11783	1.22542	1.24674	1.67067	1.48295	1.77335	1.23256	1.68199	1.60325	1.74428	2.3435	0.794372	2.4006	1.71632	0.60579	2.09885
ARID1A	1.43158	1.49981	1.32319	1.11112	1.40768	1.67732	1.48052	1.75138	1.72283	0.977357	2.39214	1.44306	0.699276	1.50519	0.944057	1.60041	1.19911	1.21318	1.19544	1.32472	0.688783	1.16175	1.03104	1.37967	1.20922	1.47625	1.57217	1.39097	1.20867	1.41432	1.44224	1.92584	2.2038	1.5596	2.3749	1.12163	1.33506	1.11602	2.69133	1.53992	0.916636	0.65465
ARID2	0.729894	0.793023	0.704901	0.512833	0.94125	0.831988	2.0598	2.38316	0.906347	0.537409	1.29291	0.624474	0.544636	0.522516	0.440345	0.750897	0.535012	0.703574	0.736206	0.659183	0.802857	0.76662	0.775691	0.483557	0.999099	0.457942	0.754984	1.00052	0.780697	0.985419	0.982797	0.951442	1.09109	1.83839	0.80393	0.901169	0.801149	0.615787	1.33764	0.567924	0.450026	1.03068
ARID3A	0.748742	0.496013	0.816183	1.31292	1.00062	0.520384	0.743543	1.09809	0.529656	1.98292	1.21053	2.58213	1.78913	2.43381	2.08412	2.69407	2.70521	2.30667	2.63032	1.36852	0.971985	0.52292	1.05251	1.32438	1.17587	0.996298	1.33654	0.79652	1.05625	1.11808	1.02519	0.566046	1.26935	0.761296	1.27857	0.906684	1.84584	2.20064	1.25241	0.682311	2.51868	0.599088
ARID3B	1.08383	2.39492	2.39453	1.39045	0.72746	2.66994	2.2957	1.64571	1.48974	2.47016	2.53799	2.95924	3.4059	2.19704	3.34467	2.09326	2.81325	2.56638	1.84084	1.88772	1.55253	1.90424	2.22266	2.53822	1.75014	1.00568	1.92829	1.67945	1.56159	2.07985	1.08902	1.53881	1.311	2.35052	2.41293	1.46526	2.37777	2.63382	2.13592	1.34807	3.5344	1.54322
ARID4B	0.237505	0.494376	0.605748	0.479727	0.331312	0.518667	0.603862	0.558062	0.900307	0.577708	0.782468	0.36406	0.310225	0.45101	0.166329	0.309482	0.309705	0.273038	0.179605	0.57131	0.519159	0.424647	0.311741	0.419694	0.542717	0.707186	0.402234	0.284321	0.290584	0.532496	0.244278	0.257412	0.276561	0.566703	0.498145	0.504864	0.434835	0.477572	0.883056	0.37664	0.169985	0.340541
ARIH1	1.13921	1.16261	3.19906	2.13801	3.34558	1.21973	2.1739	1.75214	1.97152	0.297063	2.45061	0.911596	0.35511	0.38293	0.252536	0.310379	1.82628	0.35106	0.307177	1.70123	3.71381	1.61393	1.47179	2.31466	2.2461	1.60514	1.74316	2.32471	1.65394	1.05639	3.42773	1.99106	1.63855	2.2258	2.50763	2.01793	3.52869	0.303545	2.53539	3.68198	0.258088	4.91123
ARIH2	2.09444	4.23532	7.65423	6.94451	2.40927	4.20595	2.34976	1.77154	2.40857	1.44172	2.57494	2.47368	0.652454	2.34687	1.79881	1.93114	2.31811	1.80408	1.89974	0.50466	3.6498	2.16887	2.54054	1.56928	2.18208	1.69705	0.592746	3.21443	2.87367	2.35729	2.46844	3.60657	6.05825	2.65072	3.0155	7.05219	6.38175	1.47317	2.87928	6.23588	1.83836	4.59571
ARL1	3.89102	2.4046	5.80285	6.60139	1.27109	2.52274	1.33943	2.33416	5.57944	2.21596	1.30993	1.88097	2.74164	2.22657	2.87492	2.12399	1.74957	2.79574	2.41176	1.13333	1.86516	2.15518	1.56917	0.325059	1.47589	2.46748	2.02341	2.27878	1.46404	1.60902	1.30231	2.83043	2.45705	1.37141	0.763709	6.87355	8.05799	2.26431	1.35525	6.24556	2.93813	4.34675
ARL2	1.23095	0.436212	2.08169	2.71136	1.28758	0.457645	1.5148	1.3549	2.04783	1.79304	1.50425	1.86701	0.61184	1.22859	2.06757	2.02639	1.53672	1.41608	1.57415	1.19378	1.62463	1.55983	2.81517	0.84682	3.32986	0.950548	1.02248	1.76227	1.0711	0.846736	1.3192	3.05596	1.05696	1.55097	2.13608	1.98981	2.85548	1.83216	1.5563	2.10858	2.11302	1.19599
ARL3	11.8684	7.74595	7.56963	11.082	6.00313	8.12654	9.61298	8.73161	9.92126	6.90308	6.77557	3.36666	7.32208	5.19375	6.08263	4.48717	7.11635	6.84381	6.26126	15.1627	6.77896	18.4468	10.1494	11.7721	17.3224	10.9757	15.0044	8.64501	10.6129	11.1745	6.28111	11.5475	11.1426	9.8425	8.76049	13.3276	12.7743	7.0537	7.00998	6.73547	6.21636	10.4766
ARL6IP5	33.2127	26.411	12.7657	16.1723	29.5194	27.7087	32.147	38.2747	36.6824	40.3095	43.6451	43.4849	30.1185	45.5338	52.7846	45.2995	40.9262	49.4645	49.1188	34.4317	45.1934	25.9249	16.4909	29.409	31.2143	33.677	35.0151	28.6731	20.9319	33.5373	30.2443	26.1311	13.3047	32.9145	42.2897	22.1568	20.0287	36.3522	45.1551	21.4239	53.945	18.163
ARMC6	1.80599	2.3017	1.43282	1.19327	1.38556	2.18021	1.68239	1.95337	1.77931	2.95214	1.72578	2.413	2.1244	2.63152	2.12031	1.70723	2.0325	2.28257	2.81576	0.943313	1.72186	1.20356	1.82248	0.694771	1.63936	2.07463	0.930597	1.86578	1.91211	1.80744	1.54562	1.82649	1.49175	1.72256	2.98432	1.67084	1.16613	3.01655	1.78549	0.662748	2.16692	1.09075
ARMCX3	1.48059	0.976191	1.81878	1.10059	0.631168	1.02416	1.88297	0.844992	1.47823	1.31516	1.17592	1.781	0.476736	1.27743	1.03525	1.82666	1.89794	1.26942	0.939022	1.05214	0.756484	1.45447	1.48764	1.29009	1.50745	1.86089	1.53602	1.59114	1.00302	0.7442	0.646667	1.4069	0.98409	1.68472	1.19019	2.36247	0.668634	1.34385	1.25817	1.46596	1.12789	1.21785
ARPC1A	6.42858	7.29457	14.8464	16.1469	6.98614	7.65299	8.61456	8.29768	9.98084	5.01219	7.53361	5.04707	5.06655	4.38784	3.29269	3.13961	3.70449	4.78021	3.21503	8.093	5.75387	5.78865	7.04812	7.67305	5.05334	9.16955	8.51785	7.72473	6.87973	8.6846	7.15769	6.05937	5.63209	7.84371	6.50959	16.0204	19.5504	4.93687	7.67707	13.4652	3.36508	12.1911
ARPC1B	2.6491	2.2533	7.13953	7.1782	4.57446	2.58368	1.79625	2.40965	3.9969	2.11264	1.88663	2.36132	0.93584	2.68434	2.33139	2.04305	1.34077	3.01343	3.05447	2.76379	4.9533	2.46502	3.47265	2.94228	2.9434	2.01416	2.48924	1.99619	1.28888	2.51215	4.52881	4.84712	2.26551	1.83914	3.25653	7.05883	7.36495	2.15874	1.9519	7.6399	2.02931	3.59555
ARPC2	5.11197	5.74971	14.4903	13.3005	12.2416	6.03222	1.7435	5.4009	5.3372	1.79247	1.80583	5.15678	1.4996	4.37213	4.13711	3.6936	4.16491	4.34432	4.95128	4.22173	12.1792	4.43083	3.93189	3.68788	5.12638	4.49027	3.98259	5.57843	5.04014	4.86275	12.8694	7.20502	4.2176	1.9612	4.64993	18.1335	8.65769	1.99214	3.24588	19.7045	4.05201	15.3067
ARPC3	4.17163	0.962974	6.98039	7.69307	7.74305	1.01029	2.75131	3.98872	1.90859	3.34606	2.05855	2.41282	2.27292	3.44096	3.26659	2.69851	3.35985	1.91726	3.44721	1.63813	11.8946	3.14343	1.16171	0.929579	5.54504	3.57161	1.32803	1.25002	1.38252	2.07493	7.93319	3.15878	2.4256	2.817	2.26429	10.0769	9.54039	3.41907	2.12977	8.07698	3.33841	10.8271
ARPC4	20.424	23.4221	17.1348	12.9609	12.6922	24.573	15.5913	17.54	14.6803	11.5881	12.8361	11.1373	18.2472	16.2993	13.3083	13.9009	11.5475	10.9477	11.5293	23.0645	17.0332	19.0958	20.1668	21.9196	20.6292	23.508	26.4031	19.8765	22.9636	23.7697	13.0039	19.6661	15.7707	15.9636	11.1971	16.7648	15.8533	11.9762	10.4862	5.97541	13.6008	9.20478
ARPC5	5.68368	2.11145	6.80764	5.41473	6.29474	2.21519	4.60543	2.62927	6.04016	7.24384	5.27328	3.75339	3.82644	1.99851	6.36213	3.17924	7.89276	4.0512	5.1634	3.71626	3.83584	6.06178	4.75815	4.76774	6.53206	4.78307	4.02083	7.74428	4.92139	5.15377	5.36836	4.07652	9.15282	4.71539	6.6696	6.17755	4.90905	6.1961	5.45571	3.61147	6.502	5.98708
ARPC5L	2.26469	3.34284	3.96597	5.59701	2.41077	3.50709	3.4878	4.06716	9.12142	5.55418	3.43587	4.22475	3.78223	4.68728	3.74577	4.04559	5.49794	4.16859	4.17706	4.73909	2.80072	4.40581	4.7913	4.96102	5.14325	2.82367	5.30454	3.04628	4.53373	1.854	2.46997	4.06019	3.77506	3.57108	5.10449	3.5093	6.24554	5.67537	3.55474	4.91083	3.82811	3.22221
ARPP19	7.12487	6.23084	2.45547	2.64658	7.06425	6.53699	6.50484	7.43414	3.58221	5.70988	10.7816	3.33227	6.58215	4.18277	3.27767	1.51899	2.33942	4.33386	4.34602	8.49396	5.26127	5.26558	10.0418	7.41901	5.43001	8.42893	9.04621	10.1542	6.45116	8.00279	7.05123	5.57051	6.62124	6.66016	7.13597	1.59922	3.13528	5.83446	11.1546	1.72955	3.34973	2.77417
ARRB2	1.30289	1.70811	1.83535	2.59901	1.78677	1.79204	2.32796	2.00398	1.9947	1.4433	2.10759	0.728573	1.21338	1.6285	1.01627	1.51179	0.895738	1.78553	0.77216	2.63536	0.848441	2.42932	2.29165	3.1973	1.32233	1.32836	3.77426	1.54419	2.02408	1.82584	1.83065	1.19612	3.01684	2.38354	1.60388	2.18537	2.32157	1.47479	2.1805	0.911354	1.03861	0.902177
ARSA	2.26881	0.682957	1.74637	1.92108	1.89464	0.588753	2.22261	1.92428	5.62213	0.885909	3.38342	0.915431	0.881252	1.16134	1.11723	0.357942	0.933304	2.21638	1.20686	2.96875	1.00833	2.67392	1.44829	2.65678	2.73677	1.4361	1.57537	2.42852	2.60457	2.03321	1.94117	2.09853	3.0331	2.27567	1.85439	1.89507	1.87118	0.905238	3.50047	0.400518	1.14179	0.9838
ASCC1	0.560008	0.12847	0.959885	1.10474	0.699895	0.134782	0.687641	0.810927	0.67974	0.603732	0.721787	0.752276	0.499883	0.954169	0.620161	0.430022	1.26335	11.1402	1.2922	0.287768	0.574435	0.395732	0.0847901	0.783468	0.130688	0.775235	0.804581	0.585571	0.555034	0.503394	0.717082	0.749813	0.712739	0.70406	1.24033	0.546544	1.17572	0.616905	0.746758	0.435852	0.633794	0.422182
ASCC2	0.224675	0.366109	0.757436	0.545369	0.196474	0.384098	0.635079	0.210248	0.788053	0.0653499	0.991784	0.45986	0.57068	0.370539	0.353721	0.226421	0.299279	0.0167891	0.130386	0.731821	0.672852	0.611	0.636624	0.236283	0.491846	0.346992	0.63558	0.0760934	0.429224	0.481572	0.201298	0.360894	0.1881	0.650242	0.245812	0.314956	1.15158	0.0667758	1.0261	0.438955	0.361497	0.221457
ASCC3	0.347996	0.16137	0.594507	0.680457	0.447791	0.169299	0.393328	0.774594	0.452414	0.233439	0.559649	0.590088	0.5023	0.475108	0.248928	0.353575	0.519063	0.563586	0.310073	0.322142	0.389023	0.324921	0.480678	0.273976	0.633097	0.528292	0.327868	0.316755	0.522226	0.490486	0.468533	0.567412	0.170489	0.430433	0.609779	0.61649	0.873715	0.223975	0.595789	0.353673	0.254401	0.428451
ASH2L	2.70016	1.56685	2.827	3.60593	1.91668	1.70126	1.75176	1.99369	2.35152	1.56266	2.04931	1.32172	0.982364	1.31471	0.995253	1.62071	1.52646	0.87848	1.73992	2.50483	2.15379	3.0595	1.76611	1.04335	3.16342	1.99714	1.56395	1.56725	2.06757	1.70687	1.96375	1.6072	3.16115	1.60316	2.27724	4.05833	5.01285	1.59676	1.98856	4.16055	1.48884	3.66114
ASMTL	1.51528	2.27995	3.74263	3.77991	4.43653	2.39197	2.47545	2.40071	3.10582	1.31782	2.4065	1.06469	0.636791	0.952215	0.879604	1.0939	1.05563	1.08871	0.637172	2.40928	3.46062	1.57912	1.09055	1.35146	1.47563	1.12523	1.99949	2.53613	1.85359	2.2719	4.54547	2.81143	0.699329	2.53455	2.88066	4.27101	4.74882	1.34657	2.48976	4.67427	0.898942	4.52037
ASNA1	12.0654	11.6359	12.2368	11.7429	7.76704	12.2076	10.0733	12.8861	14.0674	10.1887	9.3028	11.4492	15.7468	11.4128	10.1975	10.6956	10.5642	12.0559	7.22174	12.8914	9.85039	13.416	5.00249	8.38424	12.8413	14.7181	13.2999	5.96616	7.15657	6.97448	7.95776	10.4501	12.8929	10.5685	9.24455	11.5466	13.0807	10.411	9.62465	10.9033	9.86316	10.763
ASNS	26.489	29.0031	5.42363	5.13063	26.4826	30.3191	33.647	33.0794	32.413	16.1648	33.4545	14.9902	15.4965	14.7589	18.3621	16.0211	15.9181	17.5753	17.1969	25.4023	24.6824	24.9355	20.5976	27.4231	29.8978	26.5165	28.7369	25.7219	29.9124	29.4819	27.1329	34.6278	24.0922	33.4613	30.6122	5.30873	7.26632	16.544	34.2846	4.63067	18.7657	5.64771
ASPH	2.02887	2.95899	3.19474	3.14224	3.54558	3.00094	4.37973	2.81878	3.41131	2.89689	3.75232	3.01979	4.07231	4.53527	2.81023	3.03967	5.98306	3.74239	2.9529	3.10236	4.64816	3.24938	3.40096	2.76217	4.01892	4.41027	4.01725	2.65019	2.95609	2.41101	3.63265	4.64326	3.24992	4.4843	3.41465	2.23552	3.1236	3.01869	3.96436	2.02116	2.72252	2.59703
ASRGL1	1.28348	1.11404	1.35319	2.03665	1.63542	0.983809	2.04805	1.72228	0.454104	0.705972	2.07178	1.22445	0.261084	0.813876	1.19661	0.589425	1.15388	1.24385	0.352439	2.31638	1.72327	0.402506	1.77907	1.23456	2.60396	1.30951	2.78893	1.09621	1.67364	1.26078	1.67558	2.58897	1.86866	2.09694	2.9208	1.80889	2.50681	0.721375	2.14345	1.95499	1.22292	1.1436
ASS1	1.50195	3.16729	7.66665	8.55451	2.77397	3.32291	2.21507	2.21896	2.68109	0.690532	1.75147	0.597243	0.389416	0.785096	0.289258	0.592336	0.37093	0.550725	0.408968	1.94186	4.27335	2.47103	2.14508	0.758693	2.14987	2.80119	1.0532	2.7058	2.77696	1.92737	2.84209	3.12176	3.02372	2.26796	2.25354	8.0951	11.2172	0.705598	0.814514	5.8286	0.295617	8.70823
ASUN	0.46964	0.106986	1.50872	1.48943	0.733277	0.20932	0.371374	1.06824	1.24097	0.829861	0.774748	0.752653	0.558428	1.02713	0.930361	0.62274	0.981051	1.0773	0.670091	0.616597	0.458517	1.00096	0.490573	0.398812	0.9658	0.787993	0.751763	0.485344	0.675561	0.463903	0.751283	1.04491	0.498163	0.380241	0.780301	0.751413	1.21902	0.9084	0.875069	1.0681	0.950815	0.970973
ATAD1	4.11626	1.55849	4.36465	2.44709	3.91845	1.63506	6.77844	7.17665	7.96018	8.28062	6.51297	10.6268	2.88105	7.45729	3.36988	9.12362	6.2682	8.48319	6.20758	2.12569	4.14047	2.8069	1.6187	0.936736	3.77558	2.66655	4.89277	3.14326	3.96177	2.9413	3.68779	3.83328	3.06704	6.94028	6.62947	4.4056	3.72716	8.0937	6.7383	3.84514	3.44397	2.72575
ATAD2	0.678447	1.13928	1.35526	1.75885	0.460902	1.13364	0.941929	0.667964	0.754851	1.52568	1.01418	1.81213	1.5289	1.46619	1.04125	1.19788	1.30375	1.45574	0.974918	1.07979	0.475591	0.765802	0.760799	0.666948	1.29142	0.889819	0.73255	0.696179	0.518969	0.71683	0.47222	1.07796	1.21072	0.891235	1.27541	1.34067	1.55546	1.55897	1.25601	1.1897	1.09786	0.998253
ATAD3A	27.5385	20.5184	31.6605	28.3737	5.38408	6.22254	8.86433	7.51021	5.58124	22.5834	12.5375	16.0112	19.9499	24.1661	31.3819	25.3647	22.8394	22.607	21.0174	8.7851	13.3572	15.0946	12.2408	8.64512	15.211	13.6433	11.7924	14.9796	10.7797	14.3787	9.40293	10.7531	9.3001	15.8348	15.0812	16.4197	15.3371	59.5194	22.7452	16.0572	60.1835	17.6896
ATG3	10.605	10.944	11.3885	10.0277	6.65007	11.4817	11.3148	10.6402	10.3187	7.60718	11.2846	5.21903	5.7818	6.53941	6.32376	5.01083	6.83042	6.94584	7.87987	11.5727	9.34321	12.2869	9.79497	10.4238	15.5138	11.0152	9.69814	8.92837	9.68052	8.84378	6.81337	12.4342	13.3581	12.0455	13.5727	11.7496	10.6986	6.7708	9.49634	9.11787	6.46278	8.67977
ATG4B	1.16763	0.965424	1.24013	1.28894	1.13758	1.01286	1.29267	1.67548	1.40282	1.11471	1.36884	1.03948	0.687538	1.84071	0.766182	1.51373	1.91041	1.88079	1.48906	1.22428	1.256	2.33138	0.598037	1.3503	0.707349	1.23786	1.14972	1.90281	0.852708	1.09295	0.896929	0.68069	0.820449	1.07063	0.79605	1.96378	2.58109	1.19079	0.850913	1.20471	0.783026	0.999518
ATG5	0.521773	1.17109	1.44991	1.29086	1.37927	1.22864	2.06393	1.18108	2.41233	0.664277	1.81127	0.755294	0.733185	1.45973	1.0147	0.677855	0.488915	0.481618	0.942856	0.754066	0.964359	0.827036	0.709237	0.537098	1.4697	1.39186	0.978837	0.897809	0.718894	0.897601	1.41313	0.557773	0.119007	2.11321	1.5412	0.331619	1.53783	0.678771	1.87393	0.598442	1.03701	1.22905
ATG7	0.64275	0.775659	1.46808	1.09698	0.423907	0.81377	0.898086	0.82567	1.28447	0.391043	0.769117	0.438099	0.18633	0.226399	0.325804	0.532546	0.390337	0.448887	0.277268	0.733234	0.487359	1.0374	1.07791	0.994524	0.784988	0.692415	0.661499	1.0815	1.24458	1.03158	0.434317	0.726835	1.28335	0.919529	0.741355	0.794913	1.71602	0.399575	0.795726	0.983656	0.446585	0.535485
ATG9A	0.925214	0.892393	0.921016	1.35288	0.527838	0.93624	0.486759	0.675082	0.550656	0.976277	0.663826	0.444248	1.08579	0.820564	0.338578	0.532716	0.990047	0.641978	0.386117	0.842765	0.318962	1.4196	0.630549	0.431708	1.08764	0.573858	0.499449	1.15516	0.663486	0.653234	0.665922	1.2455	1.01951	0.552896	0.868559	0.932975	0.916527	1.03022	0.686792	0.962503	0.669822	0.647776
ATIC	44.7714	43.9881	44.8256	43.4742	42.0272	46.5255	44.2681	42.9133	33.8046	25.6729	47.1575	33.3818	19.0718	30.5329	31.4565	29.1943	26.5683	32.2577	30.269	48.5535	44.0601	53.9605	39.647	49.1619	45.2234	47.0464	46.7728	38.3637	44.4198	47.1203	43.0592	52.6552	40.3804	45.3475	48.4492	43.2115	51.6261	26.233	46.8081	41.5966	32.148	41.2047
ATL2	1.83608	1.7154	0.890489	1.01214	0.785774	1.73311	1.77737	1.81152	1.5685	4.68569	2.2156	4.99382	4.50014	5.128	5.69261	4.69288	4.36489	5.28503	5.12073	1.98537	0.701827	2.35157	1.12481	1.74722	0.973374	0.73576	1.99911	1.64417	1.61472	1.44651	0.80507	2.04707	0.471437	1.81981	2.40123	0.790362	0.738445	4.78792	2.29225	1.26644	5.71881	0.264211
ATL3	0.94221	1.01972	2.07282	2.03842	1.19793	1.06982	1.67737	1.19483	1.82861	5.42662	1.61764	5.64361	14.4551	5.45562	6.84361	4.15144	4.84622	5.88461	5.27778	0.88405	0.683618	0.26926	1.22916	0.995625	1.59144	1.23658	1.22765	1.49069	1.01724	0.96043	1.22734	1.21522	0.824152	1.71742	1.19862	1.77495	0.908042	4.78167	1.7449	1.10215	6.99406	0.68278
ATOX1	30.8516	26.1935	27.9849	20.7869	39.812	27.4805	43.5915	52.6376	26.1465	30.0013	45.9059	46.8486	29.4413	30.046	36.8973	32.4837	26.8564	30.9352	30.9796	26.8992	43.9801	34.1956	35.9768	27.2737	42.3726	37.0651	34.3351	40.5918	32.2598	40.9693	40.7896	35.9241	35.7319	44.6323	40.6021	30.4755	30.1913	30.6559	47.4941	32.043	37.7085	16.6571
ATP11C	1.08824	6.52555	1.06241	1.34673	0.940426	6.57987	1.13643	1.67379	1.50484	0.949081	1.69326	1.43539	0.876566	1.1557	0.920559	1.02565	1.47951	1.22364	1.3307	0.937577	1.37337	1.26615	1.54373	1.0821	1.14732	1.7445	0.784219	2.16187	1.37303	2.24789	0.793779	1.4072	1.00615	1.19882	1.56258	2.01174	2.53491	1.01074	1.74222	1.26399	0.990552	1.28343
ATP13A1	1.13293	1.04749	0.838842	1.26865	1.30378	1.09896	1.80225	1.50739	1.7039	3.3865	2.34854	2.32108	2.79363	2.41315	2.03072	1.98337	2.92263	2.03644	2.38696	0.957122	0.920021	1.55878	2.12219	1.1592	2.29866	1.48964	1.72418	1.42307	1.17372	1.22121	1.36145	1.67726	1.32869	1.92112	1.85186	0.781144	0.899711	2.87775	2.26103	0.478204	1.71274	0.698253
ATP1A1	41.4831	42.8324	37.2968	32.7833	38.8757	47.274	40.2996	42.1003	38.7032	57.9629	43.8862	75.1207	49.2697	69.7013	74.2991	63.1602	67.4803	73.4245	61.0283	39.6752	40.8376	39.9386	44.9933	42.6182	38.682	42.9681	44.2318	44.0459	39.4529	39.0488	38.9217	43.1689	43.1147	41.1714	42.1612	28.3287	30.4525	58.6872	42.5751	32.6536	75.4932	32.233
ATP1B1	2.43465	4.6475	3.31496	2.90117	4.3372	4.87585	1.30094	5.38858	7.62605	6.15575	4.15273	6.19846	4.78723	5.74335	6.17595	6.97957	3.5547	5.22567	7.47987	5.24176	3.02201	4.83978	7.79141	8.24425	4.58624	6.12576	6.69787	4.39131	2.00581	2.23175	4.44371	5.23355	4.94733	3.59705	4.82891	1.16904	0.231705	6.29006	4.2964	3.35433	6.31172	2.304
ATP1B3	54.3973	57.8831	48.6065	41.8719	36.4311	60.7272	48.9968	44.2467	44.955	102.463	49.2184	104.162	125.106	97.3631	101.876	93.3305	92.2334	95.6527	78.9872	47.868	39.4066	58.7191	39.5747	39.6158	54.939	59.4485	43.7891	64.6606	45.8834	54.2768	37.3257	43.7963	49.7866	50.1667	54.751	42.6318	40.9567	104.698	50.9212	40.8926	104.116	27.5809
ATP2A2	16.8877	17.7635	15.1937	17.6908	16.5101	19.04	17.4333	15.2662	21.5499	29.5819	18.8758	32.9109	23.7722	33.7461	36.6375	31.2902	30.946	32.7576	39.0441	14.5136	19.2795	15.2069	14.627	14.9452	13.9718	15.9358	14.3312	14.4721	17.9929	16.7757	16.977	18.062	13.3403	16.9966	19.2033	17.4328	23.3049	29.2201	19.5858	19.5221	37.5034	17.5812
ATP2B1	5.88186	6.79061	4.26337	4.4102	5.62051	7.12427	5.48544	4.31309	5.57512	5.86997	5.61167	5.5161	2.97757	7.77357	7.52958	4.87984	5.97959	7.29208	6.68916	6.43024	5.73817	5.91345	5.43649	6.01197	4.41851	6.78664	5.66262	5.38295	6.77924	7.95498	5.85016	10.2581	9.21477	5.89214	6.2793	3.94885	4.88524	6.1467	5.62952	3.71045	7.79272	3.19475
ATP2B4	0.861437	1.05622	1.68709	1.55368	1.29021	1.10812	1.50832	2.12517	1.93087	0.568664	1.39966	0.607951	0.648596	0.623268	0.524754	0.964032	0.473053	0.704148	0.597017	1.51138	1.89503	1.32815	1.49171	1.71427	1.39138	0.789562	1.19148	1.30519	0.728685	0.574172	1.40968	2.18165	1.03536	1.54433	2.48772	0.997042	1.02521	0.31705	1.44808	1.35074	0.605443	1.27304
ATP2C1	0.506992	0.791171	0.172513	0.245308	0.226909	0.830045	0.524889	0.779747	0.491958	1.4982	0.631935	1.17642	0.87496	1.17997	0.859505	0.808301	1.01159	0.971257	1.52658	0.524988	0.39277	0.36655	0.417236	0.386386	0.522763	0.525233	0.741497	0.780767	0.0584108	0.253006	0.185192	0.436964	0.439525	0.537421	0.36068	0.37906	0.121021	1.59543	0.653798	0.200304	0.878401	0.152868
ATP5A1	90.5308	95.3903	144.281	134.45	72.1215	100.077	96.308	114.009	145.938	236	102.165	242.621	312.311	234.95	278.501	249.418	241.565	218.361	228.637	98.9314	87.0974	79.445	98.6968	95.5396	107.04	105.201	88.2168	100.233	96.7972	101.273	73.8925	106.47	75.9569	98.6075	104.654	144.251	145.838	241.149	102.989	133.562	284.624	125.534
ATP5B	147.716	137.935	202.945	187.781	117.154	144.712	136.099	147.382	170.096	343.636	139.453	336.138	438.407	344.689	380.531	338.883	365.469	347.183	350.122	146.283	108.393	158.656	116.61	158.361	148.761	173.823	162.15	131.219	130.284	142.301	120.031	149.943	124.597	145.688	135.958	223.088	251.904	351.001	141.339	231.7	388.896	162.452
ATP5C1	6.22089	7.76448	19.6018	20.0415	19.2943	8.14598	8.09801	7.20431	10.8958	26.4737	6.40287	25.131	14.3667	29.2059	27.69	21.1227	30.7503	21.1474	22.6613	0.974316	25.524	4.74618	7.29179	5.23865	6.51918	6.24497	5.98698	3.90811	9.10102	6.76807	19.7681	7.09567	6.66539	8.29136	7.39627	30.7376	25.7932	26.9432	6.62439	34.6733	28.2988	37.0766
ATP5F1	7.91387	9.32392	20.698	21.4908	8.37275	9.82091	8.42331	4.62768	5.71705	21.9984	7.08815	32.0879	31.0076	22.7203	22.3983	20.2906	19.8017	26.8135	25.8007	9.90587	8.02513	10.2652	12.0023	6.16809	10.1469	9.5128	9.23608	10.3451	10.2362	9.90811	8.57835	10.5055	12.7813	8.62442	7.45284	18.6732	17.525	22.4784	7.33338	14.8743	22.2676	14.2751
ATP5H	46.4798	29.3592	36.4295	41.0174	54.436	30.8018	22.765	36.7313	47.3871	104.499	39.0139	125.834	12.5666	134.401	102.609	149.44	128.426	112.818	144.002	28.9614	46.6487	37.2039	15.2882	23.2704	33.6825	22.8309	32.8414	19.3147	39.4886	37.9312	55.7727	48.6394	58.6718	23.3085	41.6482	51.2299	40.7285	106.779	40.3637	44.991	104.864	54.1817
ATP5I	18.1501	43.1682	35.9142	28.626	11.6284	45.2893	21.0915	28.0427	16.8847	101.506	22.4003	79.2074	35.0756	89.21	39.3765	103.948	95.99	70.4913	69.8768	18.5428	33.9105	24.9639	32.5355	22.2618	16.9836	25.4261	21.4679	19.8423	19.7223	32.8093	11.914	15.6405	13.8162	21.5951	41.3058	24.9961	31.3318	103.72	23.1752	29.5918	40.2422	19.4682
ATP5J	49.8348	33.622	30.2247	21.8082	47.022	35.274	29.5375	27.5442	34.2274	105.434	30.0535	91.9895	53.5149	117.937	63.6718	101.247	80.4902	103.713	116.794	29.0873	41.4544	33.4365	36.1451	39.7731	36.103	26.94	34.2164	40.2331	35.6141	33.8935	48.1767	43.351	50.6292	30.2427	31.8806	25.1727	34.0141	95.6555	31.0932	24.5514	65.0715	27.5565
ATP5J2-PTCD1	1.36228	1.62971	5.91023	2.87858	1.96009	1.70979	1.60549	1.1557	2.74246	5.1735	1.81247	3.60206	4.72266	3.6999	4.84041	4.21604	4.75973	2.61548	3.83637	1.85414	1.49004	3.85137	1.26086	1.93671	1.74873	2.66551	2.33271	1.20921	1.80835	1.90368	1.99885	1.05352	1.5874	1.64382	1.8527	4.89603	7.26742	5.28638	1.87518	6.40482	4.89774	4.96679
ATP5L	17.9335	13.9154	22.1019	19.4206	35.6455	19.9879	20.2146	24.2458	20.1608	38.918	21.2923	37.4635	55.8941	30.4255	36.2175	44.5669	44.7048	32.7251	39.6706	25.2078	14.9369	21.4134	22.9081	21.3809	16.4116	27.9779	21.0573	23.3382	22.189	18.7239	36.5208	16.6538	17.5153	20.6973	14.9948	17.319	9.31481	39.7671	22.0289	8.3101	37.0137	32.4922
ATP5O	40.5088	47.2183	51.9071	59.2246	32.1034	49.5384	44.5105	47.008	30.4591	79.2591	42.3258	83.8475	91.175	76.9767	88.9933	54.6972	95.4455	76.6637	73.3473	32.1456	43.3168	34.4426	36.2713	45.2786	46.2308	38.9552	40.165	41.8558	44.5687	44.7748	32.8917	36.986	27.4982	45.5732	46.2054	60.9901	38.2204	79.6136	43.7901	61.8717	90.9498	47.8043
ATP6	12.2948	14.3779	25.8142	20.4326	9.50171	15.0843	11.1203	18.2374	22.8248	18.6327	13.0873	24.6022	20.446	33.9993	19.3237	29.9738	21.7432	20.6953	20.4382	25.4918	10.3198	14.8354	16.3552	14.3475	18.5694	27.5779	17.1694	14.6916	14.107	12.9395	9.73503	11.8236	10.1751	11.3858	19.4909	21.7646	29.1741	19.0392	13.5401	20.6443	19.7485	21.451
ATP6AP2	1.97271	2.48706	1.08146	1.50019	1.43391	2.60926	1.06576	1.11336	0.965764	3.97785	0.916803	3.73397	4.90892	5.03655	5.76914	2.67725	5.32503	3.99929	6.25343	1.95739	1.36163	1.78478	2.5089	1.47558	2.48596	1.74978	0.88586	2.14289	2.23618	2.50369	1.46913	3.10326	2.29565	1.23367	1.05787	0.641534	2.66847	4.06464	0.948521	1.85456	5.89597	1.31216
ATP6V0A1	0.601506	1.15079	1.20753	1.29493	1.05535	1.20733	1.60281	1.14574	1.25664	2.91588	5.05124	3.39238	7.43615	3.37851	2.76451	3.21603	3.77812	3.63437	2.61604	1.23421	4.33219	6.69197	0.692308	0.671254	1.30958	1.31228	1.1608	0.783045	0.693713	0.742272	1.11083	1.52258	1.15842	1.64108	1.19588	0.859708	1.15566	2.68418	5.226	0.858692	2.87672	1.11126
ATP6V0A2	0.674693	0.350968	1.14062	0.628724	0.391538	0.368212	0.681336	0.741002	1.25917	1.00448	0.689769	0.759695	1.08005	1.40638	0.623351	0.750727	0.804034	0.713904	0.832066	0.50964	0.585099	0.987844	0.73384	0.476833	0.92839	0.534304	0.930126	0.391816	0.415183	0.729875	0.401152	0.567432	0.982251	0.697604	0.697194	0.296028	0.881814	1.0264	0.713633	0.657376	0.637055	0.611065
ATP6V0D1	1.71729	4.11952	3.3333	2.32068	1.81368	4.32193	4.83388	2.41639	5.18613	5.93731	2.77363	7.30836	2.33302	4.8541	7.05929	5.00331	6.08337	5.71327	4.36927	0.430763	1.996	1.68934	3.3535	1.03289	3.613	2.58528	1.63849	2.27403	2.78093	3.99166	1.85822	3.30019	1.84077	4.94929	4.78835	2.4178	3.42356	6.06685	2.86959	2.99877	7.21448	1.87221
ATP6V1A	6.42476	4.36212	7.15136	7.85675	12.3556	5.77156	6.26472	5.81643	7.8793	5.78212	7.37352	3.89178	2.98387	5.76273	3.94577	4.76534	5.03342	4.85431	3.73651	7.27107	9.59892	6.99613	7.07554	6.88892	7.92061	6.87657	6.60538	5.81965	6.05596	6.25175	11.7604	8.2427	5.60182	6.50234	8.01823	8.98776	9.61224	5.17242	7.62862	10.7371	4.23949	9.12529
ATP6V1B2	11.1549	11.4809	11.4098	12.7557	6.23852	12.045	10.5247	10.5441	13.1467	9.31741	11.5909	8.54256	9.7248	9.20354	10.6704	10.0204	9.54297	8.59542	8.24969	11.3309	10.6115	12.8887	8.42852	11.951	11.7137	11.3634	12.5869	10.4789	12.0402	12.3563	6.44601	10.1859	8.25267	11.2415	11.5827	11.2954	13.3088	9.19869	11.9919	7.7767	10.3376	8.90036
ATP6V1C1	1.62898	2.21255	1.46873	0.806808	3.24355	2.32126	2.86266	3.89536	3.35703	1.18932	2.86506	1.07261	0.96748	1.53014	0.886468	1.13142	2.02784	0.796925	1.50203	2.56695	2.28615	0.52227	1.52695	2.38407	2.61465	1.79825	1.93281	1.52965	3.46131	1.60404	2.02673	3.05378	2.5031	2.93101	2.05602	2.57806	3.56318	1.38502	2.96418	2.53177	0.905957	1.34684
ATP6V1D	5.90372	1.54821	1.12163	1.42519	1.75146	1.62428	1.92211	2.15984	2.1332	2.94718	1.95111	1.37931	1.32438	3.73732	2.04739	1.2388	2.93668	2.3367	3.36025	1.30119	1.59324	2.92102	1.3269	2.18646	1.29026	1.86918	0.904471	0.560044	1.86042	1.95315	1.79447	2.94037	2.5203	1.968	2.29262	1.85403	1.89289	2.28026	2.01861	1.16256	2.0924	1.34151
ATP6V1E1	3.59816	3.41359	2.14316	4.80719	3.02166	3.0304	7.21516	5.56325	3.2675	3.24498	5.82295	4.56364	3.05158	5.90731	5.08131	4.48014	6.20364	5.64537	4.83062	3.81181	8.0621	5.60111	4.35394	2.42673	6.19623	5.17024	1.592	3.74622	4.54326	4.08473	3.09586	5.27046	2.2375	7.38743	6.24728	3.13482	4.92326	3.31578	6.02441	3.03948	5.19302	5.05161
ATP6V1F	4.76549	4.76175	3.9549	2.98079	3.30517	4.99571	5.41145	2.3959	8.04017	8.61878	3.46675	8.97387	3.61071	7.84345	5.91651	6.6993	9.68502	8.32633	8.26111	3.61189	4.78458	5.55222	5.54486	4.31177	5.60211	3.94911	2.58286	5.73386	3.8871	4.42573	3.38633	4.12323	4.51357	5.54066	3.98741	4.52446	4.76491	8.16795	3.58669	4.70163	6.04658	2.6132
ATP6V1G1	8.59545	9.19378	4.81824	7.48743	9.15462	9.64551	8.82527	1.48192	9.42585	12.0982	9.44897	9.56424	4.03125	10.4998	7.70568	12.2263	12.7321	10.2813	9.62355	12.5	6.69855	2.66991	9.61827	8.86243	5.8582	10.5298	8.75048	12.5199	11.0187	11.5094	4.35976	6.13121	14.0903	9.03598	4.77371	9.02034	8.56061	12.3622	9.77587	6.99539	7.87508	7.10367
ATP6V1H	2.13757	0.787837	1.51162	1.57965	1.7355	0.826546	2.86331	2.6043	4.64053	1.5754	2.62348	1.90103	2.28484	1.70237	2.75124	0.492771	1.87908	2.0242	1.96868	1.96788	0.922583	1.98333	1.10488	2.13927	1.87239	1.98721	2.16845	2.17914	2.87069	2.67803	1.67466	3.08634	1.2182	2.93167	2.54787	1.96269	1.10871	1.72519	2.79627	1.76914	2.81172	2.35404
ATPAF1	4.26416	1.62446	5.18923	3.50157	1.79434	1.70427	2.26248	2.89021	5.87187	3.33218	3.32002	5.98237	2.62227	5.35147	7.76763	6.8265	6.4329	6.54603	6.63964	2.23146	0.740361	3.50799	3.48476	3.88568	2.66335	2.37854	3.07713	3.28408	3.28	3.70319	1.8384	1.59849	2.26029	2.3165	2.07045	4.10747	5.39899	3.40488	3.43488	1.99659	7.9384	4.62714
ATRX	0.351985	0.237675	0.322651	0.280696	0.301259	0.247222	0.317969	0.548237	0.636443	0.212718	0.540192	0.330473	0.126294	0.284056	0.0830042	0.21907	0.344327	0.215185	0.224802	0.179958	0.154341	0.341873	0.182854	0.130051	0.41802	0.314575	0.217731	0.329832	0.252017	0.153401	0.330269	0.172179	0.274258	0.361555	0.362566	0.324093	0.383141	0.103243	0.605216	0.462022	0.084829	0.39249
ATXN10	11.8292	15.1069	7.17976	10.6086	11.4021	16.6653	16.5143	15.364	13.6895	8.91593	20.8759	11.6824	8.64165	7.79911	11.2841	10.7586	10.9904	6.66527	12.3411	11.366	12.0273	14.5897	15.5975	13.1726	15.8513	14.4841	11.8308	11.7158	15.0366	16.8084	11.682	15.1556	15.817	16.9086	19.4825	12.4221	7.38126	9.11046	21.5982	10.3229	11.5322	10.5345
ATXN2	1.42687	1.02089	2.56717	1.57996	2.06511	1.03047	1.57339	1.66603	1.16393	1.50834	1.97952	1.47814	0.740221	1.20455	0.798299	1.12923	0.932199	1.56497	1.12169	1.27915	1.20131	1.35952	1.26552	1.26822	1.57083	1.12142	1.53481	1.54612	0.992876	1.31861	2.07135	1.77404	1.77787	1.54939	1.46293	1.23775	1.87757	1.54125	2.048	2.16452	0.861525	2.36732
ATXN2L	5.9789	6.88813	7.44657	6.9638	10.0579	7.22658	10.1397	9.46198	8.23017	6.62291	11.4827	7.45674	6.40665	6.43309	6.55336	5.42525	6.89	7.4145	5.61031	10.5456	8.03536	11.1358	11.1234	11.6997	10.2443	9.35647	9.68044	7.08914	7.45864	7.99905	10.371	10.2314	8.7142	10.196	7.34466	7.04027	7.73103	6.66486	12.0063	6.97682	6.35408	7.16284
ATXN7L3B	6.45112	5.28005	3.76878	2.41735	4.75348	5.53948	6.38239	6.55229	9.65764	3.91914	7.63865	3.72824	1.39031	2.25542	2.71374	3.59947	3.28969	2.7411	3.87716	1.93039	3.52797	8.03877	9.48297	7.87715	6.31435	7.52361	7.95803	6.97393	6.79851	6.19016	4.8702	5.48788	6.62575	6.53478	7.18242	1.9868	3.18233	4.00465	7.90292	0.527162	2.7734	1.36798
AUP1	2.38525	3.43343	0.841267	1.53577	2.28746	3.60213	3.20659	3.02127	3.49913	5.30013	2.67751	4.56672	6.75269	4.99282	5.82978	5.42015	5.29141	4.58018	5.78938	4.2076	2.74695	4.21009	3.5615	4.46651	3.99019	3.81108	4.35744	2.49096	2.61669	2.48854	2.34363	3.4798	4.34399	3.28316	2.83062	0.977021	1.18453	5.41577	2.77015	0.660713	5.95794	1.36798
AURKB	2.16158	2.16642	6.8597	7.05448	2.58859	3.04507	3.91407	3.89561	2.10243	2.75882	3.19479	2.53271	2.74296	1.95823	2.58556	2.80307	2.52259	2.1164	1.99626	2.4886	2.58957	3.19465	3.63302	3.6403	2.57292	3.06941	2.47116	3.11992	3.09391	2.95272	2.65215	2.95898	1.64508	4.00753	3.33206	7.54561	7.38533	3.38562	3.30532	5.12448	2.6424	5.33073
B3GAT3	0.77939	0.943052	0.792164	1.13056	1.23166	0.989388	1.07508	1.31898	0.971803	2.97143	1.33955	2.40162	2.71333	3.35191	4.84326	1.80976	3.19948	4.23739	3.08955	0.69283	1.64874	0.807614	1.529	1.18395	2.71127	1.09556	2.02737	1.09471	1.08052	1.4739	1.26191	1.50517	1.95921	1.10075	1.25287	0.686172	0.767306	3.03626	1.38589	0.327882	4.80215	1.40718
BAG2	3.84064	3.61639	4.81599	9.2761	4.47986	3.79408	4.98113	7.23476	9.13529	5.83464	4.92944	5.43462	4.74054	8.41679	7.08528	7.28919	6.57196	8.54568	7.09504	5.03093	4.24529	4.52677	6.25029	5.94296	3.61919	6.70351	6.14841	4.33418	4.84135	3.20281	4.58987	5.15488	3.03476	5.10006	5.22827	5.78405	6.73912	5.96194	5.09998	6.94189	7.24104	4.8966
BAG3	1.90547	2.29788	2.08412	1.9927	2.17658	2.41078	2.33258	2.06386	3.16026	3.00028	2.4799	3.29813	2.65422	2.17352	1.96921	2.8587	3.20351	3.24254	3.08947	2.11814	1.57795	1.66849	1.97108	1.42552	1.52999	2.17952	2.13511	2.53291	2.86871	2.45391	2.53595	2.48862	3.72996	2.38827	3.31479	1.95586	1.81597	2.92532	2.5657	2.08612	1.85954	1.97925
BAG5	0.505199	0.597295	0.892382	0.609982	0.886826	0.322336	0.891279	1.11125	0.976129	0.524473	1.15769	1.14988	1.16275	0.924036	0.580675	0.690679	0.58938	0.391283	0.751356	0.340301	1.03188	0.750619	0.321501	1.00298	0.489811	0.340143	0.196351	0.266746	0.630619	0.752346	0.908603	0.791346	0.304698	0.912559	1.11866	0.811721	0.303709	0.630917	1.31368	0.729879	0.593441	0.656493
BAG6	7.30452	8.78506	9.07646	7.19057	8.58939	9.40353	11.7873	12.1347	9.52134	7.31219	13.4145	6.71484	7.93965	8.27327	7.66007	8.52928	7.4295	5.5128	6.16393	10.0133	8.46506	5.72007	9.13985	8.79637	9.65246	9.8937	10.1086	9.24892	10.2042	10.7871	8.67359	9.08524	9.47514	12.1816	13.6632	9.08486	7.17838	7.11568	13.0079	6.74559	7.9728	7.33844
BAIAP2	2.02279	1.61083	1.09317	0.995542	1.39913	1.57814	7.18615	8.56546	8.37137	1.53086	1.652	1.40949	1.82059	2.05922	0.971491	2.38372	3.54783	8.026	1.24202	2.13815	0.991328	2.16186	10.2973	1.7843	3.57874	1.64226	4.00689	1.71168	1.94975	1.95268	1.43349	1.63342	7.28108	7.35773	2.03263	0.816053	1.02334	1.78335	1.68003	1.23496	1.0826	0.870633
BAIAP2L1	0.902367	1.45368	1.72418	1.65442	1.75281	1.52511	1.49422	1.67379	1.40584	3.1813	1.98294	2.06022	1.98284	2.21988	1.52557	1.72817	1.91846	1.91669	1.9779	1.30137	1.22288	0.992383	0.439836	1.2815	1.72799	0.910681	1.13456	0.758353	0.911611	1.20779	1.79585	1.59453	0.580179	1.52989	1.52508	1.63498	1.52273	2.07426	2.15013	1.15644	1.5591	1.47231
BANF1	179.913	86.6986	35.5308	53.8999	168.302	90.9585	27.7465	123.97	58.9203	125.796	23.0539	74.7183	71.3863	149.46	138.554	97.6323	100.086	116.51	137.525	190.605	129.58	261.702	74.7723	139.859	88.9448	205.202	185.498	62.6052	132.415	118.03	172.435	212.129	72.6767	28.409	137.854	54.1612	62.3111	128.982	27.2635	28.6331	141.6	64.1182
BASP1	9.29488	11.489	4.29626	3.88219	7.61336	14.0625	17.5055	15.4475	26.9856	14.3517	24.0499	13.0185	0.338388	11.539	6.08538	17.0044	14.6151	15.6337	14.3586	10.8918	7.79129	11.3219	16.0426	16.7937	11.2184	10.5031	21.758	13.6992	14.9997	9.68438	7.80031	10.9518	19.1815	17.9234	24.1209	1.71215	5.14741	14.6648	24.8819	3.29973	6.21916	4.06203
BAX	3.08829	3.34894	4.20563	5.70521	7.39312	3.51349	5.15326	4.66824	5.86412	5.54476	5.52208	4.93704	2.2259	5.18315	4.69918	3.22088	6.59311	7.68678	3.53312	6.03754	5.83802	6.83512	4.413	5.14309	8.39994	4.68033	4.74943	3.27346	4.17785	4.67267	7.85561	7.99471	1.76731	5.2763	5.30633	5.66811	5.76386	5.66574	5.92425	5.21156	4.80248	5.13562
BAZ1A	2.09258	1.82802	1.96237	2.35549	1.53954	0.961429	1.87243	1.66477	1.6617	5.62297	2.04653	4.00809	2.86284	4.8538	3.4996	4.69563	5.45564	5.23581	4.18456	2.67476	2.0007	3.90893	3.64665	2.24686	3.8901	2.55932	3.35572	3.58881	3.75091	3.23496	3.15469	3.00717	2.45966	3.83428	3.50062	1.2722	1.92249	11.4913	4.23466	1.29949	7.04056	1.16342
BAZ1B	3.88985	4.22791	0.840202	0.727979	4.82439	4.39778	5.05666	5.40671	4.34573	5.23574	5.70513	4.79111	3.54117	4.52287	4.0847	4.99652	4.22402	4.88466	4.72244	4.51567	4.75905	4.83277	4.57304	4.66608	5.20212	5.00005	5.10186	4.34689	4.4098	4.36945	4.76214	4.84365	4.26827	5.17739	4.90002	0.506184	1.09817	5.07089	5.81629	0.707669	4.06086	0.647767
BAZ2A	0.588402	0.346331	0.559851	0.139576	0.628612	0.280297	0.741241	0.730544	0.516508	1.86089	0.990202	1.84344	0.97296	1.50459	1.19245	1.65225	1.56892	1.93512	1.90129	0.564483	0.403029	0.904053	0.88669	0.914262	0.851987	0.434962	1.03685	0.8519	0.701478	0.567285	0.644048	0.421942	0.648382	0.758939	1.11371	0.327824	0.420476	1.95568	1.02446	0.373848	1.21866	0.232694
BBX	0.319229	0.690582	0.346375	0.32811	0.521923	0.724513	0.678362	0.558661	0.331843	0.135495	0.186942	0.274089	0.221149	0.351978	0.216516	0.146044	0.249923	0.513959	0.432423	0.492628	0.443235	0.678774	0.126682	0.200615	0.626669	0.727603	0.259359	0.274224	0.283157	0.116487	0.53338	0.507037	0.475662	0.694559	0.920505	0.404113	0.544704	0.138451	0.193409	0.0810579	0.221276	0.287868
BCAP31	17.5032	12.4837	14.7802	13.5011	54.9705	10.4057	27.2076	31.9999	20.2408	36.6559	19.0397	37.0335	36.0524	36.4956	33.5793	36.1031	32.6625	30.7528	37.8342	13.8816	26.0162	19.206	15.2604	16.0447	23.3318	20.7976	14.9222	15.9163	16.5499	16.4914	56.3203	21.489	19.204	27.8572	21.5905	15.9121	14.4603	37.6314	19.6984	15.4115	32.7521	40.8362
BCAS2	13.9776	15.9219	20.1466	18.0051	12.3414	16.7042	17.2453	16.7337	31.1031	29.5193	20.9753	27.6214	22.0818	26.5143	33.9171	32.3479	26.3963	22.6057	19.3784	14.9683	17.8039	18.9323	18.0313	16.1906	13.5312	16.8921	14.4553	18.6459	18.1097	21.6682	14.4954	15.4366	11.3177	17.6571	21.9929	25.9107	25.9982	30.1633	21.701	19.7645	35.5323	15.2154
BCAT1	4.20917	2.7134	5.21455	7.86367	2.91281	3.14324	3.62136	3.57589	6.59042	0.323023	5.3854	0.580796	0.287128	0.749802	0.82297	0.429593	0.589112	0.903794	0.331717	2.2281	4.20347	4.04108	3.13794	2.7608	4.2249	4.94228	3.13006	2.65703	3.63211	3.30178	2.98433	4.83831	3.422	3.70782	3.47207	6.25881	6.79907	0.713839	5.57172	4.20804	0.841062	3.36855
BCAT2	0.602536	1.71217	5.57455	6.78928	2.06294	1.7963	1.86254	2.09903	2.20853	2.80896	2.32659	5.86674	4.31338	5.19195	3.19949	4.22599	2.55242	5.21553	2.81021	1.59812	2.36342	1.52336	2.02526	1.59171	0.607024	2.66002	2.25717	1.99391	2.04037	0.877865	2.1136	2.21946	2.61489	1.90701	1.98807	7.55471	4.04376	2.87025	2.40708	7.38854	3.26983	3.52609
BCCIP	118.855	99.2002	64.5168	30.6602	19.4768	104.074	72.9231	73.2467	78.6747	61.7352	75.7183	69.7891	112.964	77.2863	83.9966	48.7498	124.286	49.4428	52.0827	180.088	54.9025	97.1198	80.6874	99.3973	89.9995	32.4222	97.3469	71.7663	76.9826	90.4193	19.955	75.8106	72.4193	74.6642	62.8531	64.5703	73.4809	63.0822	78.3379	45.9254	85.8432	49.8399
BCKDHA	1.41119	0.801317	3.13328	4.43848	0.947022	0.685909	1.61002	1.38577	2.14642	5.09968	2.64942	4.76508	3.97545	5.62161	4.32088	3.73314	4.63409	5.62942	5.80864	1.56608	0.668042	1.93528	1.51889	1.61772	1.77191	0.996925	1.71572	1.40712	1.72931	1.15267	0.970277	1.95039	2.04003	1.33117	1.73514	2.55822	4.14636	5.21095	2.74108	2.61062	4.41587	2.64454
BCKDHB	1.24271	1.92705	4.56544	3.50926	0.660337	2.02173	1.73183	0.293584	1.88019	3.06223	0.68129	1.88858	3.34762	2.38287	2.53577	2.96479	2.9224	1.79675	1.88832	1.72613	0.23772	0.917985	1.18342	0.784392	0.537603	1.41042	2.24907	1.36296	2.09458	2.46965	0.676552	1.3496	0.832269	1.51919	1.71354	3.38754	5.03038	3.12904	0.704861	2.19789	2.59152	2.63949
BCL2L13	3.50799	5.11119	1.85635	1.90801	3.05457	5.36232	6.1584	5.0756	5.80952	6.6645	5.888	7.87044	5.62401	8.50245	7.51149	7.68048	6.62996	7.61791	5.85179	5.81005	3.93924	2.39378	3.90176	4.94843	4.71312	3.14183	5.1109	3.033	4.27178	4.12684	3.12957	4.89313	4.10355	6.30544	5.01168	1.93784	3.17627	6.80991	6.0917	3.23967	7.67662	1.89488
BCLAF1	67.5295	36.5237	47.4612	36.7881	73.6641	38.3182	71.5333	79.1964	53.4002	66.9321	61.3415	82.0913	71.7638	75.6151	45.1145	64.8083	65.3539	83.4287	74.2618	50.6601	67.2052	53.3614	68.0817	54.0032	55.1537	42.5184	40.9753	54.6863	47.6426	50.6664	75.4729	42.1941	41.5996	73.135	67.8408	48.9953	46.1821	68.1895	46.8854	50.1634	45.8643	104.404
BCOR	0.26787	0.340439	0.378298	0.207123	0.191578	0.357166	0.278559	0.496022	0.45887	0.569707	0.629537	0.650421	0.627254	0.692309	0.557101	0.522601	0.738925	0.77397	0.43895	0.309299	0.284934	0.433256	0.406348	0.13956	0.284846	0.146135	0.280494	0.21074	0.297257	0.215993	0.230999	0.288288	0.347516	0.28521	0.595357	0.135933	0.110475	0.520117	0.651317	0.165626	0.592007	0.269278
BCR	0.17759	0.277244	0.331987	0.2078	0.160926	0.290866	0.240867	0.125606	0.343277	0.451265	0.379724	0.221734	0.380194	0.624651	0.0272393	0.344163	0.367576	0.540701	0.237219	0.482527	0.160863	0.39101	0.121125	0.162354	0.252306	0.161645	0.154775	0.280392	0.139402	0.268196	0.164877	0.313176	0.0760554	0.246618	0.0932577	0.280166	0.198943	0.461111	0.356941	0.128034	0.0671088	0.292819
BCS1L	2.3826	2.79813	4.20119	4.35172	1.21997	2.93562	3.21389	1.82467	2.55312	6.96741	1.86689	6.1398	8.62957	5.66775	6.75698	6.205	7.28665	5.82493	5.12448	1.55181	1.73421	1.81615	3.34442	2.73386	2.12102	1.18324	2.07126	3.35469	3.05082	3.00033	1.10292	1.89576	1.51702	3.29062	2.58401	4.4087	5.47944	6.62611	1.93148	3.48613	6.90553	4.04152
BET1	14.1923	11.7011	10.0372	5.06032	3.99911	12.2761	5.12262	6.06093	4.14569	17.4858	7.3982	14.5608	3.78488	19.1322	16.8324	16.4545	21.901	17.7398	18.7095	1.63981	7.10901	6.42417	2.70646	1.98924	11.0624	4.04741	3.39339	5.39092	5.21809	5.41941	4.09732	15.2892	12.3671	5.24493	9.05915	5.57446	11.9676	17.8673	7.65416	13.404	17.2025	3.79013
BICD2	0.418418	0.444494	0.768085	0.246592	0.530926	0.466333	0.560279	0.276589	0.52853	0.946418	0.361191	1.10619	0.677206	0.713305	0.187853	0.636437	0.591251	0.637961	0.200213	0.306892	0.857474	0.634492	0.533165	0.143925	0.525623	0.679422	0.236906	0.236836	0.332508	0.177861	0.604225	0.310712	0.407376	0.573656	0.311	0.447186	0.368363	0.967068	0.373687	0.177749	0.191983	0.342627
BID	3.66177	5.55444	2.27107	3.61269	4.53803	5.82735	6.49658	4.64935	10.4558	5.39956	6.71672	2.92957	3.83654	6.53491	5.25708	3.3919	5.91061	4.67379	5.64335	5.29507	3.70581	3.47262	4.81385	4.56109	3.88031	3.38992	5.74324	2.70371	5.45441	4.75768	4.64947	4.23891	3.44146	6.65169	6.06492	2.41543	2.02899	5.51737	6.9491	4.63078	5.37265	5.247
BIN1	0.375655	0.703596	0.629826	0.877967	0.482792	0.738167	0.597184	1.33382	0.748085	1.90823	1.16681	1.23049	1.68813	1.28788	1.25034	1.21729	0.954613	1.79853	0.669243	1.39754	0.386005	0.582986	0.54826	0.937483	0.342042	1.54744	1.55972	0.706029	0.81988	0.777179	0.494647	0.348376	0.592877	0.723003	1.34136	0.492533	1.16932	1.94987	1.20717	0.291069	1.27783	0.342474
BIRC6	0.42472	0.616464	0.391112	0.111212	0.393172	0.662062	0.489831	0.611988	0.580266	0.338355	0.68091	0.305984	0.0755785	0.436357	0.358644	0.334622	0.384149	0.347158	0.288927	0.274295	0.309644	0.317797	0.462773	0.31627	0.488768	0.238539	0.238677	0.295366	0.377251	0.414632	0.413633	0.636436	0.717142	0.506305	0.602437	0.205351	0.461812	0.345737	0.636266	0.341461	0.34294	0.114044
BLMH	6.04417	4.45963	9.95322	12.6005	8.38249	4.67876	4.46604	5.35459	4.83992	2.73255	4.49106	8.17538	3.07509	5.37124	6.31038	6.16715	4.89476	6.47717	7.04723	4.13877	11.4156	6.00021	3.77471	3.88667	7.74245	4.54334	5.05759	2.98934	4.18837	4.13943	8.58833	9.79171	7.30541	4.57267	5.05572	14.4606	10.4847	3.35349	4.64644	9.45664	6.27575	9.22285
BLVRA	4.64562	3.2323	13.6194	10.916	4.54313	3.39112	6.74643	8.92727	10.0314	2.56937	6.76481	1.33536	3.06417	1.09236	0.308359	1.47217	2.15948	1.32502	1.05104	4.80988	4.9771	8.11535	2.70613	5.49407	7.99506	6.26248	6.0433	4.96465	5.13329	5.18821	4.65469	4.62683	4.59344	6.9075	5.39472	10.3981	16.1519	2.62543	6.99885	12.1928	0.557346	8.23652
BLVRB	14.7706	6.57036	17.1874	18.397	16.2162	9.26912	15.3846	20.6546	17.6511	8.0324	13.2417	7.27567	5.02714	7.59247	7.32508	6.07934	6.94028	7.22895	8.56786	7.91154	17.9872	12.6975	11.517	10.8664	17.9175	10.6728	14.6081	9.14738	13.4566	12.8419	16.6145	13.219	17.3266	12.9756	15.2571	16.9104	19.3653	8.20765	10.6459	14.9344	7.48612	12.1089
BMS1	4.20927	3.49402	2.94296	3.00545	3.91943	3.6657	4.58128	5.16179	3.60433	5.78277	5.50575	5.15125	3.48272	5.28805	4.54589	5.29676	6.11825	6.55305	5.6839	2.86089	4.21815	3.56889	2.95518	2.89057	4.42753	3.89657	3.93268	4.30078	4.54683	4.13845	3.94171	4.83247	3.5923	4.69066	5.7413	2.45174	3.02332	5.52024	5.40373	2.36405	4.54609	2.33706
BNIP1	3.70421	1.98967	2.86983	2.61876	2.79601	2.47146	2.00744	1.81253	1.48958	3.63142	3.08273	5.98369	4.77283	4.96419	4.20049	4.05537	4.18551	6.45039	4.00369	1.32003	1.53966	0.454195	1.83258	1.96998	0.896958	1.09305	2.6	2.11196	1.46988	1.50036	2.86467	1.96256	2.09129	1.74986	2.02916	1.17359	1.24393	3.55185	3.18938	2.53243	4.81055	2.3357
BOD1L1	0.584638	0.620264	0.445333	0.425366	1.207	0.65074	0.823205	1.0103	0.921038	0.312698	1.18079	0.241175	0.0521042	0.241292	0.116504	0.295549	0.272376	0.425486	0.323771	0.875586	0.778157	0.772209	1.07059	0.793909	1.1011	0.906027	0.943745	0.693104	0.67421	0.676275	0.768818	1.25925	1.21096	0.84286	1.31713	0.519625	0.527469	0.319521	1.07762	0.359801	0.119065	0.273975
BOLA1	2.54991	1.69162	1.84055	1.39291	1.64022	1.77474	2.27625	2.71968	2.95418	2.46706	2.33563	3.20992	2.10304	2.33575	1.68774	2.24601	2.78168	1.3789	2.37366	1.76404	2.04684	1.76659	0.958445	1.52085	2.14279	1.4762	2.64351	2.71909	2.51263	3.36298	1.68049	2.27131	2.30598	2.3306	1.84543	0.905364	2.07263	2.52089	2.85126	1.54893	1.72484	1.73057
BOLA2B	40.3295	24.4212	28.299	30.0077	38.0331	25.6211	46.1159	42.8113	47.9348	23.1244	43.0073	36.2652	24.3236	34.2758	22.3226	32.7999	28.0283	29.4393	29.1872	36.249	53.4796	43.097	35.7076	36.6743	31.8623	49.0698	27.6896	45.3422	40.2334	43.9287	38.967	39.9072	33.8117	47.2169	47.0945	35.4953	37.0887	23.629	44.4952	29.0157	22.8134	29.0768
BOP1	8.61496	10.6504	7.54892	8.72434	6.99438	11.2215	10.1851	8.1974	10.6884	18.4391	9.82609	16.8877	16.5618	21.3903	19.8149	18.2561	19.7899	21.243	12.0009	5.07318	9.2393	10.3183	9.69215	11.1596	10.5909	8.30057	8.13811	7.54595	8.85079	8.45851	7.16614	9.43506	6.65602	10.4283	10.6736	7.97242	12.598	18.8172	10.166	10.6282	20.2505	7.84601
BPNT1	11.0921	12.59	23.7276	20.2912	12.6067	13.2086	9.91525	13.0692	8.48726	5.1304	6.84074	9.35551	3.35408	8.81355	9.21973	7.57374	8.09558	9.57611	7.21758	7.31499	14.3859	9.05738	8.31342	8.3868	7.93014	8.12776	10.1093	7.81716	7.64313	6.9304	11.6183	13.6841	11.2905	9.62261	6.88114	17.2908	19.9339	5.24234	7.07741	21.9166	9.50714	15.1621
BPTF	0.504013	0.424321	0.493384	0.334995	0.36686	0.44517	0.596066	0.700932	0.766645	0.364811	0.781392	0.484569	0.310572	0.598621	0.39245	0.355031	0.398063	0.647462	0.474732	0.802696	0.507027	0.623897	1.06988	0.662918	0.729416	0.548317	0.621905	0.560367	0.423862	0.971075	0.408818	0.635624	0.766096	0.530899	0.767913	0.453883	0.44602	0.358059	0.808426	0.44475	0.401077	0.266388
BRAT1	0.404451	0.489894	0.222149	0.204903	0.515311	0.513965	0.40546	0.419013	0.043552	0.932532	0.733429	0.7016	0.793402	0.741806	0.490302	0.812497	0.773879	0.95997	0.825621	0.177328	0.384081	0.197465	0.506206	0.337033	0.395193	0.135051	0.45151	0.333438	0.416176	0.344031	0.436928	0.393234	0.206863	0.415141	0.572898	0.0425709	0.202535	0.952879	0.732683	0.106285	0.534082	0.0586495
BRCA1	0.0417046	0.101638	0.102129	0.0695619	0.0496353	0.106632	0.140345	0.0782758	0.310786	0.0235511	0.215365	0.0286343	0.0308586	0.0510268	0.0169859	0.0102581	0.0398174	0.0138273	0.0244537	0.16019	0.138907	0.178511	0.0840581	0.0350207	0.15658	0.0896224	0.0563926	0.0898606	0.119997	0.111779	0.0748119	0.0909593	0.122971	0.158557	0.106609	0.116504	0.121153	0.0240649	0.248943	0.0624044	0.0401167	0.0468685
BRCC3	1.71562	1.11637	2.58935	3.70283	4.0821	1.55294	2.01255	2.3054	2.26011	0.650657	2.21282	1.57642	0.812028	2.10363	1.70342	1.02541	0.525818	1.68376	0.975653	1.40393	3.93327	1.30304	2.55535	2.3182	1.77861	1.81266	1.9912	2.05901	1.80022	2.28134	4.09716	3.29979	2.91229	2.0606	1.50443	4.01483	2.64401	0.664854	2.28937	4.23184	1.74087	2.58782
BRD1	0.266586	0.184459	0.288811	0.320771	0.232104	0.193522	0.662803	0.305197	0.203469	0.241116	0.47417	0.417395	0.515546	0.605895	0.247448	0.662079	0.22309	0.33445	0.259704	0.480359	0.0879907	0.804027	0.197158	0.577858	0.450418	0.273034	0.375637	0.240537	0.150231	0.452687	0.259048	0.269951	0.254499	0.678628	0.390725	0.412031	0.174016	0.311184	0.628096	0.09246	0.252888	0.22955
BRD2	7.94181	9.56508	9.73965	8.41696	8.19658	9.90003	9.67781	10.781	9.32219	8.8778	11.222	9.47622	7.80173	10.3059	9.92895	9.41714	10.6794	9.74636	8.39327	7.9696	9.73899	8.75188	9.64637	8.78142	10.622	8.64643	10.7293	8.42296	9.42512	8.97227	8.39786	8.9079	11.3884	8.86007	11.7923	7.74664	6.3985	9.0715	11.2757	8.32278	10.1472	10.3384
BRD3	2.19196	3.7745	2.31159	2.11634	2.79264	3.95996	2.36443	3.2091	3.7403	3.14698	3.10292	3.09801	2.51597	3.30735	2.46176	2.87293	2.79597	2.59246	3.23828	2.47783	3.69507	2.65139	2.7524	2.59701	3.62357	1.96716	2.73656	2.44352	2.64012	3.19317	2.86122	3.01617	3.59443	2.42088	3.22777	2.81594	1.60263	3.21564	3.21027	2.97553	2.51588	2.57409
BRD4	4.13419	5.49277	4.44523	3.90939	4.18368	5.63515	4.44626	3.93787	4.3894	4.00555	5.33649	6.46963	5.51027	4.39032	4.69611	4.01389	4.92317	4.83511	4.41838	2.8697	3.9833	3.95148	4.70834	3.91203	4.13138	5.47768	4.47856	4.57597	5.11938	4.99046	4.37266	4.78636	3.26191	4.55242	6.78001	4.42453	3.58126	4.18036	5.29546	4.07202	4.9541	4.71223
BRD7	0.580669	0.820737	0.424781	0.482601	0.646439	0.931388	1.14104	0.823789	0.571656	1.07031	1.31291	0.687642	0.694276	0.772322	0.223029	1.09349	0.757779	0.562196	0.733163	0.70212	0.82536	0.489901	0.787454	0.449187	1.08273	0.695213	0.392477	0.496617	0.635683	0.596505	0.662312	0.933204	0.989241	1.09378	1.44839	0.41072	0.687379	1.01397	1.21202	0.629271	0.227932	0.299359
BRD8	0.927165	1.12119	1.07022	0.800122	0.997548	1.17628	0.851731	0.956235	1.61526	0.588716	1.48091	0.564845	0.100285	0.539769	0.170177	0.660744	0.450103	0.930129	0.396217	1.14177	0.681805	1.33487	1.06527	0.89285	1.18857	0.974939	1.21173	0.724875	0.755734	0.759509	0.961675	1.23244	1.76292	0.872067	1.34073	0.78816	0.73061	0.601561	1.50962	0.815884	0.173919	0.586315
BRE	1.5144	7.13922	4.26047	2.58749	1.28743	7.49	1.00247	1.51017	5.67134	1.56223	2.01375	0.333529	3.84548	1.68298	1.12457	0.467445	1.4975	0.662765	0.19017	4.52168	3.85205	4.9826	3.9021	4.31118	2.74798	3.9235	3.99145	5.37365	2.17362	2.18984	2.07228	3.79162	3.82965	1.0264	3.24094	4.20803	3.80838	1.59632	2.08342	2.15529	1.1493	2.70254
BRI3BP	2.29684	3.19728	3.09074	3.16821	1.79329	3.35438	3.08803	3.5979	2.50284	3.70092	4.64792	4.87631	3.33934	3.40496	5.71421	5.67301	3.60055	3.71675	3.97016	3.97872	3.07477	3.6086	2.78741	2.53959	8.13754	2.73217	3.54559	2.75629	4.37545	3.581	1.83733	3.73986	2.99429	3.16176	2.00398	2.66979	2.31672	3.78167	1.80186	3.57788	5.83983	1.99362
BRIX1	15.5566	9.51872	13.0325	16.0685	7.08224	10.2752	10.874	15.5006	12.9623	12.2134	13.0772	13.5284	9.719	14.55	16.8423	13.5314	13.1725	15.2129	22.0821	18.8828	11.5067	21.9857	8.6345	8.01832	25.2074	13.0021	12.4931	10.3634	11.0776	12.3278	7.25615	21.4375	21.3307	11.0589	13.481	15.6646	16.4527	12.4798	13.5113	9.47433	17.2126	12.8135
BROX	3.32402	4.49286	2.81724	3.0939	2.81678	4.71361	4.58395	3.90186	6.90611	1.96536	4.79637	1.38358	4.26967	2.32967	1.31898	2.67345	2.39663	1.98759	1.83994	4.42753	2.66097	3.92845	4.85844	5.24081	4.60942	3.55018	5.54112	4.32545	2.93762	3.71087	2.88595	3.77786	4.2265	4.6934	4.98566	2.38458	4.47585	2.16741	4.9623	4.16667	1.34798	3.65852
BRP44	2.18883	0.988082	8.00387	5.5028	11.7866	1.03663	2.65901	3.56593	2.17915	3.54759	1.88884	3.37546	4.98227	7.04776	5.47747	3.66012	8.0064	4.43423	3.83261	1.41345	7.35298	2.88031	0.979564	0.670704	2.79397	3.01478	1.64525	0.721345	1.13797	1.32361	12.076	2.63825	1.77158	3.67613	1.82005	5.75238	6.88723	3.06736	1.95419	9.02423	5.59789	9.96898
BSDC1	2.27508	1.98166	2.76536	1.59932	1.88722	1.75079	2.18776	1.00346	2.52112	0.634908	1.90365	1.76774	0.526142	2.09206	2.28796	3.1291	2.37951	2.06494	1.74555	1.37904	2.45518	0.423162	0.157705	0.125533	0.203703	0.524867	0.26582	1.6004	0.900867	0.88731	1.15284	2.99074	1.42481	2.23999	1.13752	1.36606	0.777852	0.64876	1.96951	0.463912	2.16154	0.860055
BSG	369.925	205.939	169.28	150.314	316.357	216.058	322.134	350.479	342.853	404.239	401.826	429.624	289.366	397.237	301.78	333.958	419.537	503.202	314.686	240.673	213.745	244.48	282.665	221.375	271.212	236.706	327.589	284.78	276.595	305.417	324.125	248.011	296.583	329.826	406.657	203.51	224.837	413.059	414.314	184.642	308.414	134.343
BTAF1	0.324796	0.974243	0.709457	0.36412	0.442146	1.02211	0.889496	0.716164	0.796826	0.623914	0.875737	0.947685	0.46119	0.577701	0.432801	0.630979	0.55449	0.43359	0.337836	0.382608	0.477546	0.471614	0.432028	0.449128	0.584094	0.971123	0.983245	0.471831	0.53146	0.398595	0.514194	0.875877	0.560171	0.899947	0.850809	0.331992	0.603749	0.637527	0.906034	0.323022	0.471463	0.419346
BTF3	268.078	276.644	204.898	255.394	120.907	145.118	114.323	109.088	148.838	239.95	114.025	146.306	245.62	159.033	228.069	195.038	170.182	246.296	174.131	143.796	122.896	166.839	102.089	168.896	170.601	205.424	212.419	145.036	181.341	165.467	123.876	165.289	151.18	117.053	155.7	103.241	121.563	245.186	117.97	122.16	233.083	95.0378
BTF3L4	36.5765	28.6028	26.2088	34.7552	37.054	30.0081	30.8155	33.5568	46.6355	17.639	36.5323	17.7692	13.18	17.7571	17.8862	18.6887	20.6943	15.1115	22.5985	25.3645	39.0805	49.3488	25.7537	22.248	56.2684	28.9112	32.8094	32.6112	36.8732	34.4956	37.9639	59.1637	39.8796	31.5513	34.2013	32.6496	32.8284	18.0239	37.7962	25.2198	8.03354	35.0486
BUB1B	0.343869	0.432411	0.226426	0.110182	1.475	0.414126	0.348148	0.319687	0.272647	0.143726	0.618381	0.153712	0.157475	0.11149	0.16498	0.259388	0.195902	0.121503	0.146646	0.208162	0.243037	0.260835	0.270243	0.445432	0.356148	0.348273	0.287953	0.32374	0.235117	0.21436	1.51121	0.438983	0.224059	0.451318	0.539061	0.225072	0.319104	0.146861	0.639775	0.20076	0.168607	0.205631
BUB3	21.8216	20.5528	38.1073	38.2018	21.4877	21.5626	24.0081	22.8533	16.5738	28.3458	19.6566	20.3281	16.5866	22.274	21.7842	28.925	23.0445	25.4719	27.0391	17.8167	30.0277	17.9846	22.8526	17.6305	22.765	17.095	18.7572	23.8468	21.6985	20.9126	22.0154	21.9689	24.7165	24.5813	20.0661	32.0226	34.6742	29.0348	16.9495	33.1519	22.2631	37.8353
BUD31	5.4363	1.43719	5.26762	9.83093	4.49613	3.0462	4.11392	4.60229	3.224	8.46697	0.842327	3.62406	2.70372	7.42017	1.16032	3.82694	2.36349	6.9114	7.13241	6.70054	8.45241	6.02257	3.63739	7.25936	6.72529	5.34069	8.11475	0.520113	7.42805	8.29303	4.60653	6.25877	8.11323	4.21214	2.82072	5.94321	6.37029	8.65171	0.871469	2.32924	1.18583	1.50619
BYSL	6.02379	7.02341	5.31998	6.45292	6.92264	7.90851	8.95736	8.07385	4.37789	7.45824	8.87759	18.3206	11.3806	24.1909	8.74155	20.6383	11.0172	16.1534	13.3291	5.8849	10.9031	6.83946	6.99073	4.91776	7.56416	10.147	6.64946	7.7439	7.12678	8.69817	7.09263	9.80497	6.55787	9.02851	7.23183	4.74532	5.0306	7.62097	9.18472	16.0443	8.93372	4.98973
BZW1	2.98293	4.022	5.36654	4.31799	5.39525	3.48515	4.35258	4.46102	5.61233	4.6359	4.02617	6.76514	6.47288	6.05902	7.39153	6.1467	6.65577	5.75115	6.13089	3.29892	6.3212	3.42524	3.69646	3.63931	3.86253	3.07726	2.97108	4.16242	3.23511	3.69591	4.43042	5.44493	3.2371	4.37859	3.21829	11.4447	5.34257	4.6675	4.07192	4.64435	7.35859	4.77384
BZW2	6.33792	3.693	5.83438	5.75386	6.83268	3.80625	1.97835	3.58364	3.52557	2.5198	2.299	7.31716	1.5724	4.46095	6.10336	5.23053	6.44987	4.92477	4.55267	4.07721	7.34133	5.12509	3.03815	3.27949	4.83344	3.00955	2.43574	2.56555	3.3644	2.72761	7.00047	6.73575	4.90069	2.09769	2.84842	4.43864	5.0166	2.63918	2.46515	6.01122	6.34433	5.3899
C11orf31	3.52592	4.56647	2.62911	1.37347	7.66659	4.79084	4.36522	4.83338	4.38785	2.20344	3.42543	2.11895	2.6019	1.73032	0.794296	1.70626	1.85816	1.39931	1.13531	4.42613	7.2672	3.99853	3.9398	3.66999	2.70946	5.53232	4.49156	3.58452	5.31222	5.48907	7.85485	2.27566	2.88404	4.46945	3.74786	1.21818	3.60329	2.25152	3.54394	1.36776	0.811758	1.85369
C11orf84	1.43452	2.17466	1.21203	1.4424	0.748697	1.78263	1.71846	0.595256	2.01331	0.783454	2.64524	0.686699	0.374184	0.613928	0.278249	1.00584	0.50058	0.592912	0.256603	1.84533	0.866721	1.42639	1.28279	0.893145	1.8657	1.52605	0.945835	1.86425	1.28334	1.91124	0.697965	0.982852	1.8708	1.75949	1.56501	1.55699	1.87394	0.735167	2.73676	1.21339	0.390981	0.924182
C12orf10	6.49317	5.76166	5.57053	6.88549	5.22238	6.04476	8.83337	9.7015	6.17116	3.42399	10.1659	3.42149	1.4237	3.631	1.93774	4.0261	1.75691	2.36017	2.56913	8.49676	6.19917	8.08082	7.52788	8.02737	8.10482	8.08593	8.95373	8.90901	8.87482	8.19543	5.35062	6.05689	7.77216	9.04428	8.85035	5.60659	7.51625	3.49869	9.25346	5.18331	1.98034	5.23146
C12orf23	8.99358	6.97573	22.7462	18.9518	5.97	7.31848	12.4405	11.0231	8.98349	4.04476	14.2662	5.99463	7.49377	4.12957	5.4869	8.65381	6.55831	4.43072	3.83147	5.80851	9.34007	9.04036	12.4984	10.9989	10.3492	12.6301	8.23361	6.31158	6.4454	3.87596	6.11659	11.975	6.47871	12.7375	13.5179	16.844	19.8855	4.13301	14.7597	18.9705	5.60753	14.5127
C12orf43	5.67319	5.89491	6.47515	4.76461	5.1699	6.18455	6.4636	6.16779	6.59858	2.932	6.2152	5.72591	3.16086	3.45659	3.09587	6.87097	5.94139	5.48219	7.02235	6.22361	6.42065	6.4769	3.38531	5.24081	5.65222	1.55188	7.7708	4.74849	4.88862	4.35981	5.49409	7.67784	9.08102	6.36004	6.2754	2.71984	5.92982	4.07861	6.43022	5.17542	3.16393	3.51525
C12orf5	2.76897	4.60149	6.12847	4.84192	2.93372	4.82758	4.30161	5.39423	4.82229	1.66354	4.92697	1.10204	1.23572	1.49685	1.39749	1.10392	2.73757	0.704021	2.24892	3.26535	3.912	4.06944	4.82495	5.25497	4.04764	4.84215	4.17284	3.53726	3.75106	4.54517	3.00576	4.97072	4.33425	4.40431	3.30689	4.63148	2.66858	1.69983	4.90149	3.72903	1.95053	3.4157
C12orf57	4.32101	5.7386	6.33258	5.56312	4.22573	6.02056	8.15993	9.28909	9.77435	3.74423	8.74408	5.55634	1.70071	2.9907	3.21802	4.89609	2.88996	5.28841	3.48474	4.61514	4.06067	5.1371	5.63338	6.90799	5.99836	5.22671	6.21377	6.5621	6.94984	7.92999	4.3295	5.71677	3.90251	8.35475	7.80143	4.70555	6.49889	3.82592	9.04659	4.27166	3.28876	3.83015
C14orf142	9.75221	2.69894	2.76956	3.13325	4.75955	2.83155	7.12934	12.6517	8.58194	2.68068	13.0177	5.08108	0.690137	8.29581	4.78251	7.21544	6.19859	3.47305	8.65108	7.26295	2.72882	11.5638	8.48641	9.85735	20.3703	6.6758	6.50329	3.74603	11.1781	12.8882	4.87642	11.8929	16.6857	7.29956	5.86719	2.90049	5.56473	2.73917	13.4681	3.74938	4.88765	2.35052
C14orf166	30.8888	27.7913	33.1886	30.6078	21.5544	29.1568	29.9346	24.5266	34.1213	33.2837	27.3244	31.6484	27.0704	38.0781	36.9796	31.4026	32.8322	28.8979	23.8419	28.7754	24.4961	25.4594	15.7378	20.7163	25.5746	28.7125	24.9188	25.8737	27.0268	27.9077	22.0837	30.2508	25.0049	30.6493	23.9881	35.1622	49.8839	34.3664	28.2697	40.4778	37.7926	26.6171
C15orf44	1.6625	1.94987	2.08654	1.67701	1.51263	1.86313	1.54503	1.97471	2.13842	2.21107	1.94953	2.24488	1.46425	1.88872	1.70572	1.42761	2.08048	2.09077	1.84647	1.597	1.9166	1.53801	1.36175	1.09885	1.40207	1.14413	1.625	1.49949	1.98109	1.43008	1.37972	2.27715	1.42244	1.58192	1.25023	1.83464	2.09081	2.25931	2.23635	1.76314	2.10238	1.16239
C15orf63	7.3503	6.54634	5.37056	6.68554	6.29901	6.86799	11.1487	9.73524	4.67048	12.9415	11.558	7.07447	4.7268	7.38988	11.4014	9.70178	12.3715	8.56672	14.091	7.77905	5.42361	8.62691	9.33421	7.50848	10.5784	8.94132	9.15565	9.55656	9.75142	9.87544	6.45369	9.46752	8.78066	11.4149	11.7323	9.53087	5.11016	14.0017	8.65511	1.3513	11.6521	10.6022
C16orf88	2.64145	1.6535	0.718568	0.586797	3.66657	2.03477	3.01745	1.29772	2.65709	2.61808	2.20611	2.89939	1.76015	3.74228	1.70123	1.99566	2.15632	1.74912	2.09277	3.01268	3.04287	1.13394	3.90362	2.77141	3.15763	2.0893	0.885013	2.97075	2.347	2.21404	3.75661	2.70851	3.49676	3.08949	3.20597	1.01397	1.20767	2.67521	2.50279	0.859304	1.73863	1.33293
C17orf49	121.209	110.357	141.726	120.718	80.6495	115.78	162.614	112.461	77.5223	63.1022	116.028	53.9601	49.9512	78.0063	52.7988	63.1911	55.9219	59.7904	44.9719	129.763	77.6648	134.988	95.2713	164.479	154.444	137.312	163.052	99.7007	100.586	100.237	72.0861	161.543	117.904	166.497	145.098	125.511	106.301	64.479	122.257	123.345	53.9596	121.452
C17orf59	2.17109	0.659761	0.409239	4.97256	0.694311	0.692178	0.14182	0.374709	0.67561	0.628101	0.966601	1.3385	0.4873	0.725823	0.778792	0.708558	0.540979	1.07137	0.782594	0.421907	1.54078	1.56205	0.348291	0.263083	0.187484	0.264067	0.381043	2.4177	0.361185	0.485291	0.71136	0.173268	0.486177	0.145206	0.977202	0.111407	0.482485	0.398333	1.00004	5.93804	0.795913	0.377848
C17orf61	26.0097	25.921	3.01614	2.20656	12.4793	27.1946	15.4446	16.0092	24.7958	42.1132	23.6019	26.6594	47.7051	37.8466	42.677	47.9226	44.2787	31.7252	37.959	31.3971	19.5428	45.6581	23.7209	11.0025	50.7588	31.9281	22.8731	16.454	21.2755	23.384	12.7857	30.7763	34.328	15.8134	30.8735	1.90026	1.90766	43.0321	24.4184	2.10613	43.6152	1.22417
C17orf85	1.64309	1.41639	1.05247	1.14378	2.5203	1.18297	1.7721	1.59249	2	0.619187	2.16795	0.795344	1.00485	0.984151	0.915021	0.765452	0.910654	1.01187	1.34335	1.49963	0.798604	1.26501	2.03317	2.10329	1.68689	1.61601	1.66578	1.54954	1.19701	1.07796	2.58218	1.25698	0.909123	1.37058	2.31591	1.22337	0.809667	0.748202	2.24296	1.11752	0.601285	1.55849
C18orf25	2.41436	1.86359	1.02206	0.892337	1.29621	1.95516	3.64324	19.3229	5.24988	2.34273	4.64495	2.95887	1.56748	1.87798	1.33576	2.7704	1.66339	3.0193	1.99389	1.77999	1.65117	2.28683	2.1227	1.48494	1.76985	2.102	4.03816	3.38239	3.71373	3.3616	1.32803	3.83189	2.6391	3.73023	4.26605	2.0647	0.59577	2.39385	4.80565	1.39845	1.36513	1.08307
C19orf10	5.01288	10.0503	14.017	20.7339	20.5177	12.3956	16.7721	16.8568	9.04307	20.5415	15.5855	17.5139	1.4467	25.711	8.50185	20.5817	23.6838	18.1703	9.30292	7.53982	9.73787	18.335	19.7663	15.5313	16.1256	16.9148	6.10094	18.3117	13.1204	14.1849	21.0215	12.6084	3.14727	17.1725	17.1934	19.3111	19.7753	20.9897	16.1247	35.2049	8.68876	19.8865
C19orf25	5.70064	8.15395	2.22835	2.41128	5.55357	9.91557	6.44236	7.84824	4.19507	13.8531	6.75975	11.707	19.4393	14.8881	14.8039	13.6414	14.1243	14.9317	14.0176	7.5352	7.12886	4.89901	5.27713	10.4793	4.91305	7.04676	9.38376	5.98059	6.84736	8.18874	5.68994	5.77159	6.92671	6.59618	6.97142	2.04086	3.30983	14.1553	6.99361	2.1871	15.1293	2.43344
C19orf43	22.6244	20.8109	10.4153	12.0902	15.5468	22.8164	15.9333	13.3492	31.9046	27.1205	15.5975	18.2627	5.46921	21.9591	15.498	19.5928	16.7823	21.0007	25.0428	19.2367	17.7067	14.5065	21.7335	25.1167	15.5022	23.8651	42.8454	26.9252	41.4905	31.119	15.9286	20.5202	45.6555	16.3137	19.2929	12.5613	10.3515	27.7122	16.1371	10.2019	15.8387	7.59995
C19orf52	0.519254	0.178878	1.13595	0.80358	0.380968	0.187667	1.11017	0.934475	1.1694	2.8135	1.35486	4.1261	3.59879	3.97162	3.18896	3.55751	3.31857	2.09504	2.83102	1.66485	0.316936	0.651628	0.159281	1.17414	1.64116	0.763236	1.45365	0.97511	0.320493	0.657228	0.390323	0.257917	1.28098	1.13667	1.45239	1.17304	1.73663	3.06853	1.40173	1.36097	3.25907	0.974677
C1orf123	4.499	8.72328	6.23082	6.0521	4.40827	9.15189	11.2249	1.77938	10.2363	2.44332	6.16331	3.06097	6.53828	4.8275	5.11738	5.44013	2.28267	6.34148	6.66909	7.90861	3.53719	4.9761	7.75086	8.14967	3.35292	6.2881	1.96332	5.56476	5.99638	5.50343	4.51652	8.42043	5.79645	5.93222	5.54863	5.81926	4.52963	2.49663	6.37654	7.87523	5.22988	3.7315
C1orf27	0.817076	0.687164	1.09519	1.99838	0.818234	0.540307	0.66149	0.770436	0.746012	2.40073	1.32942	2.47984	0.545629	2.12866	1.01969	0.905003	1.80939	2.92754	1.14347	0.910142	0.50329	1.18968	1.04203	1.59865	1.918	1.98909	1.18988	0.980917	0.602696	0.999547	0.937942	1.09765	0.524331	0.677284	1.67762	1.04072	1.03689	2.31702	1.54929	1.13342	0.885326	0.92382
C1orf31	20.3828	33.5957	15.9864	16.4735	13.4081	35.2465	30.5562	30.265	45.6454	45.7028	34.5049	39.7722	13.6789	48.7206	17.0177	35.6818	39.5388	35.238	40.7581	15.4971	21.3222	32.4304	37.9962	28.3453	33.6644	25.1898	28.9516	30.9714	27.1956	25.2376	13.7373	15.8948	37.7363	26.932	35.4686	19.6669	11.3968	46.7	35.6987	10.6619	17.3919	10.9111
C1orf35	3.94444	1.84949	5.17646	2.3103	5.60462	1.94036	4.95066	6.09509	5.70766	1.8042	5.29403	3.19804	4.01453	2.31358	2.83962	3.41082	3.73811	3.20052	2.17794	5.03988	3.78632	4.78539	6.49868	3.85344	5.46711	5.84446	6.07024	5.62777	4.94581	4.5371	5.74225	3.71997	4.08409	5.06886	5.56359	3.96815	4.35728	2.36062	5.47719	4.21839	2.90204	4.10539
C1orf52	1.87705	3.27425	1.81133	1.47191	1.81181	3.43513	3.7058	3.50943	3.51243	5.51288	3.73612	3.76069	3.11963	2.70681	0.932182	5.16067	5.31848	2.80059	3.66904	3.87099	2.48971	4.2176	3.6618	2.20514	2.41395	3.99669	4.96586	2.24595	1.71239	2.4911	1.8563	2.6242	4.12515	3.37932	4.10393	1.44069	0.958778	4.5939	3.86537	0.483098	0.952675	1.20782
C1QBP	247.424	238.571	127.711	133.828	184.847	250.883	237.512	219.973	408.383	368.423	238.777	291.655	118.987	350.228	301.944	329.818	334.793	359.885	421.826	320.883	215.642	350.199	239.582	304.472	305.895	254.821	294.828	214.972	292.689	294.268	189.163	282.657	295.145	243.183	285.748	140.674	186.578	375.079	245.991	147.964	308.582	123.953
C20orf27	6.40476	4.99024	10.3508	7.6339	7.92146	5.23544	4.44975	5.24242	4.86032	5.70341	4.01364	6.56583	2.13947	7.08781	6.82025	6.48268	5.74654	4.82166	6.37727	3.5667	4.41482	3.69837	5.13526	4.62165	4.2754	3.45842	3.84076	3.81966	3.56895	2.6918	9.4593	8.82983	6.03499	4.55599	4.00964	6.4866	10.4421	5.82784	4.1525	15.8986	6.97019	20.6082
C20orf72	1.66181	3.25955	5.01205	3.72696	2.829	3.16782	2.69977	2.25564	4.87836	6.773	3.0323	5.95659	8.49297	7.7653	7.55908	7.87042	8.99132	6.06487	7.16855	1.66163	2.81126	2.18055	2.31874	1.55038	1.70802	2.48078	1.93959	3.69934	3.36281	2.1434	2.89847	4.47008	4.83518	2.76423	2.84748	6.44783	5.75604	7.45996	3.13721	6.81143	7.04337	4.42164
C21orf33	11.64	13.668	18.2292	22.6673	11.9875	14.3396	13.819	15.9654	19.898	18.5406	16.2676	23.2473	25.0041	23.8828	23.4948	24.2973	16.7736	18.8972	22.8074	10.2789	17.014	19.568	9.96678	9.41573	19.7133	13.7474	15.596	11.5222	14.3656	16.0581	11.3341	13.497	12.5321	14.1489	14.2342	21.3105	21.6321	18.9451	15.6592	20.6387	24.0113	21.6787
C22orf28	26.5272	31.4506	40.0815	41.7359	30.0426	32.8831	40.9763	31.3344	24.1829	30.6223	40.6028	33.644	25.6978	39.0196	26.0387	30.7929	33.7832	34.2771	37.1154	38.7477	24.5234	41.0414	37.8716	30.5829	46.5464	43.4518	34.2654	42.7781	35.0679	32.4334	29.4271	37.8538	49.2988	41.9547	39.733	46.9563	42.2107	31.2904	42.0075	36.2137	26.6111	43.9517
C2orf29	0.881559	1.15516	0.889956	0.928455	1.27334	1.21192	1.04947	1.3479	1.59127	1.09312	1.00887	1.1761	0.188135	1.14781	0.813639	0.633656	0.784951	1.16861	0.507651	0.955737	0.999328	2.10163	0.993262	1.03814	0.962566	1.28606	1.05669	0.621384	1.1813	0.929104	1.30461	1.00038	1.24027	1.07453	0.712575	0.671356	1.29594	1.11697	1.04377	0.647355	0.831526	0.345744
C2orf47	0.702313	0.319932	1.34833	1.66795	0.570995	0.335651	0.706556	0.943752	1.43391	2.64564	0.668951	2.31825	2.55637	2.7162	1.59585	2.20461	1.28505	2.04199	2.4869	1.09747	0.305249	0.795384	0.216998	0.756176	1.08841	1.39733	1.20405	0.826961	0.602796	0.560929	0.585016	0.954391	0.938115	0.723426	0.395413	1.39728	1.11588	2.70336	0.692095	1.53625	1.63093	0.89103
C2orf49	1.95722	1.54367	2.30207	1.39629	1.35865	1.61952	3.24598	2.7088	2.54087	1.58367	3.76946	1.54988	1.72207	1.72018	1.2033	0.956027	1.67894	1.78782	1.43032	2.19341	1.48477	2.05474	1.68836	2.42654	4.15727	2.08368	2.40127	1.97797	1.33037	1.91826	1.39201	2.03114	1.58835	3.32348	2.38333	0.751758	0.417931	1.61822	3.14107	0.404711	1.4559	0.607046
C2orf56	0.540621	0.68438	1.99313	1.59848	0.508804	0.832013	0.778649	1.24434	1.68929	1.99932	0.851755	1.51027	1.72174	2.01459	1.57118	1.97788	1.81555	2.0198	1.75885	0.31621	0.710992	0.796619	0.15273	0.666064	1.17607	0.903857	0.614238	0.577239	0.75055	0.372051	0.447566	1.10547	0.490164	0.385759	1.07831	1.25595	1.72638	2.04294	0.654976	1.17713	1.60572	1.52525
C3orf26	8.62858	7.12738	4.73151	5.96126	5.10041	7.47758	0.983421	2.00187	2.81502	6.05509	2.11468	5.37671	5.04171	6.86463	4.62494	7.72293	7.43976	5.00358	2.51717	2.67649	4.04264	3.00628	3.50698	3.24646	3.61764	3.91435	1.41273	7.06883	3.91312	2.82462	5.22566	4.97834	7.5208	1.0069	3.93948	6.21076	4.72193	7.12957	2.18784	4.83576	3.94499	3.19042
C5orf24	4.27092	1.22877	1.12997	2.96004	2.42442	0.891643	2.39814	1.10847	1.97601	2.59866	3.80623	3.05192	0.881567	4.80263	0.515741	0.697698	1.92911	2.818	4.87369	1.15563	2.58025	2.50106	1.15202	0.316034	0.747309	0.937686	0.620906	2.55093	2.32118	1.70921	2.48395	5.24889	5.86659	3.89294	4.33484	0.652345	1.02132	2.65536	3.93791	1.54526	0.527079	1.36066
C6orf108	16.9298	16.1023	28.8036	19.6426	19.3955	16.8935	8.0147	17.9203	31.1031	15.7331	8.28216	18.4067	20.9543	16.9027	14.5495	14.2292	13.2522	14.4515	19.9308	20.363	22.2114	21.1164	23.3036	17.9665	28.0956	30.1504	19.5428	17.7005	16.2467	15.7203	20.0645	20.8606	22.4023	8.20606	19.0253	15.5244	21.6872	16.0764	7.04271	19.61	14.8694	25.7996
C6orf211	8.04403	6.6772	6.14326	5.76592	6.67346	7.00528	7.02075	5.5662	8.65947	2.27474	7.86075	3.61954	1.76611	2.43396	4.80137	3.24918	3.84449	3.02026	2.86985	7.55633	8.43367	5.08588	5.77709	7.746	4.92065	8.17587	6.97401	3.91076	6.1497	6.46799	6.83733	8.76382	5.38762	7.18837	8.00843	8.25599	5.28218	2.0089	6.96023	10.1135	5.08701	5.23841
C7orf50	8.68308	9.72451	2.28958	3.8596	15.4973	10.2023	11.5725	14.4489	18.7252	7.35967	16.1391	8.37846	1.52488	7.4104	2.44422	7.90867	9.88548	8.4156	7.00383	12.5537	10.6935	12.8468	17.3363	18.4085	17.1266	12.5001	17.0964	7.8796	7.82385	8.76783	15.8779	11.3407	10.4223	11.8488	15.295	3.13309	3.18465	7.93416	16.6975	2.27052	2.49795	2.78745
C8orf33	3.47084	6.56009	2.53084	2.06501	3.41282	6.88241	9.34473	7.29414	7.24506	7.99355	11.2947	9.00593	9.2425	12.5324	5.87518	11.8923	6.90263	11.1332	6.57903	8.54139	7.01401	7.75496	2.84782	9.60606	8.05484	8.03574	9.82228	6.43987	8.33802	9.80421	3.49662	9.03447	6.13835	9.56785	11.4162	1.40146	1.20922	8.39292	11.6855	1.13587	6.00434	1.37746
C9orf114	0.728943	1.3772	1.82411	2.16967	1.11382	1.44486	2.21223	1.62892	1.56017	1.58072	1.3989	2.47424	3.27907	2.90376	2.28062	1.76885	1.83149	2.67835	1.49273	0.550492	0.785499	1.06453	1.5635	1.9418	1.63124	1.15836	1.80107	1.08143	1.18387	1.2998	1.14117	1.07588	0.805401	2.26505	1.64654	2.35765	2.04761	2.61419	1.4473	1.77471	2.33076	2.65809
C9orf142	3.23002	1.29617	1.91652	1.78475	1.90964	1.35986	0.428143	2.10493	5.11366	2.17358	1.6944	2.55937	1.2929	2.48589	2.26165	1.59322	3.13019	2.80728	1.61347	1.42548	2.7512	1.46059	2.88198	3.17449	2.04836	1.20779	2.32856	1.464	1.45483	1.80976	1.95653	2.12396	2.64705	0.781135	3.03309	2.95709	2.19506	2.22101	1.75302	2.48116	2.31137	1.84105
C9orf64	1.86284	3.3334	4.51498	5.11665	2.07876	3.20368	3.08657	1.80646	3.01759	0.971817	3.1195	0.204601	0.131989	1.58582	0.41472	1.28999	0.475704	0.922541	0.615708	2.0563	1.66636	1.26304	2.34904	2.31584	1.90009	2.63701	1.58281	1.8914	2.12616	2.38996	2.1298	2.23727	0.953887	3.16027	2.01557	4.52063	5.13506	0.99302	3.22742	4.07113	0.423837	3.69907
C9orf78	2.51992	2.29584	2.83256	2.37524	1.88595	2.40865	3.52565	4.03216	3.66669	2.24582	3.40721	1.39503	0.891732	1.55539	2.08741	2.45658	1.71485	2.24922	1.91541	3.06347	2.85754	2.64455	2.63696	1.92452	3.58995	2.54347	3.18694	4.12636	4.03684	3.65439	1.93226	3.65832	2.94374	2.48261	3.25506	2.14588	2.76391	1.54699	3.52509	3.05838	2.1333	1.87519
CA2	127.858	149.156	113.334	105.195	166.653	155.908	170.395	143.039	126.954	92.1668	175.249	85.1867	99.705	97.055	80.4527	92.1903	91.3101	89.5441	63.1429	165.38	147.08	142.148	194.516	187.577	147.176	194.721	208.331	170.122	171.652	141.227	170.745	139.562	114.321	174.463	147.104	98.9671	119.665	94.1777	181.312	109.972	82.2214	119.319
CA8	7.71549	9.22879	8.85756	7.48243	5.36519	9.68224	6.71433	9.54463	8.23017	5.80205	9.86596	3.86701	3.47842	4.42421	4.3006	4.79307	3.71191	2.78694	3.53541	10.0265	6.39685	9.21088	8.91183	11.6443	10.2473	10.5805	11.556	9.91545	10.2717	9.95218	5.49693	9.02567	10.4745	6.87465	7.77804	10.0596	12.0569	5.92864	10.2073	8.45957	4.68729	8.52729
CAAP1	0.971467	1.44496	1.17008	1.83977	1.03323	1.51595	2.60957	1.09042	7.10705	0.822378	4.7696	1.42206	1.36822	1.5327	1.82974	0.950528	2.47453	0.917057	1.74041	2.70811	1.61785	0.787926	1.59976	2.2014	0.810173	1.26063	1.10408	2.11272	2.0773	1.98619	1.0586	1.06737	1.45045	2.67188	1.34589	1.67593	2.62197	0.840321	4.93461	1.23763	1.86996	0.474701
CAB39	2.75858	3.34213	3.02028	3.77122	4.23398	3.50634	2.91023	3.28121	4.30174	2.23431	3.06084	2.87606	4.04267	1.41119	2.28796	2.89606	1.57334	1.89265	1.94592	3.55775	1.6303	2.76335	2.61795	2.28477	2.43907	3.85134	2.61356	2.59231	3.194	2.7101	4.33795	2.33019	2.32224	2.97972	2.73781	3.31883	4.2765	2.28306	3.16673	3.95825	2.33826	4.72587
CACYBP	59.0999	54.8859	96.7753	82.5789	52.0244	59.7154	49.2027	77.2114	60.8603	50.4809	59.5678	48.5587	33.1682	56.6317	51.8844	57.546	50.4715	56.0169	62.8786	58.7049	57.41	83.114	65.7154	50.8194	69.0216	63.0065	55.1626	53.3265	54.8103	51.0025	52.8311	80.0431	77.2836	48.1247	66.8983	114.219	101.582	51.153	61.592	102.619	52.9051	116.031
CAD	12.6055	14.0755	13.368	12.2792	12.0198	14.7671	13.3765	13.2058	18.4085	10.0714	13.7758	11.7227	10.2308	10.3788	11.4234	9.25946	10.2343	11.899	10.2289	16.1435	16.0316	15.6649	11.9061	13.5419	16.3962	13.1529	12.8429	12.6968	13.1615	13.5989	11.9101	15.02	14.1354	13.6909	14.939	13.3221	12.9682	10.5566	14.5142	14.3505	11.3865	12.678
CADM1	7.4142	6.47344	5.33696	5.53277	7.01702	6.79151	8.17776	8.83619	11.0924	6.19863	9.49769	3.19496	1.56573	6.39439	2.33742	4.27944	4.63787	5.84221	5.00635	9.42012	7.0291	10.5779	9.24587	9.08029	6.11468	7.34165	11.9883	7.15803	7.35338	8.44887	7.18933	7.0927	11.022	8.34729	10.4632	7.72243	9.28153	6.33388	9.82628	6.02401	2.3888	5.77923
CALD1	6.21658	7.95628	3.19569	3.06839	4.77874	8.45805	7.06759	6.78355	8.22282	6.69983	7.78229	8.57022	5.97485	7.09089	4.43887	6.28602	6.9222	7.61919	6.90128	6.21619	5.87053	6.49826	7.62212	6.94849	6.43493	4.18623	5.50345	4.49967	4.15838	5.01269	4.89609	8.92017	8.87987	7.19377	7.00713	3.57637	4.04497	6.92791	7.80669	3.33009	4.32555	5.23634
CALM1	92.2921	85.4414	79.2874	63.6763	83.0903	89.6395	114.899	104.184	134.112	32.9318	106.082	28.0445	5.09651	25.6441	20.6801	29.3706	34.8565	25.1269	34.7683	137.915	60.7612	125.667	126.253	150.48	119.94	115.135	141.451	124.983	121.818	112.503	84.762	114.832	122.14	117.352	105.021	75.7273	94.0132	33.6503	109.752	67.9853	21.1347	91.6413
CALR	87.2464	32.6947	55.5946	85.5374	111.404	34.3011	81.2103	83.0494	88.9044	146.654	84.9224	142.627	21.2854	153.766	63.333	166.163	157.105	189.354	197.864	73.1332	77.9291	75.6976	56.9042	36.8375	59.2235	48.4163	55.6448	76.2775	47.2656	81.3423	114.232	87.4383	109.148	83.1493	89.9773	95.9548	85.6469	149.714	78.7935	97.1411	64.5617	132.76
CALU	128.507	112.225	288.094	318.037	279.843	114.69	237.075	256.84	439.311	207.628	250.309	254.836	19.2191	185.417	153.782	217.247	214.418	266.253	329.254	202.925	238.084	180.458	212.231	202.198	188.588	167.681	137.065	145.16	128.292	121.939	295.171	219.798	143.049	241.301	239.811	375.449	355.98	212.158	261.048	360.703	157.163	309.767
CAMK1	1.64799	1.29378	1.77246	1.65742	1.01292	1.35735	1.8482	1.89712	4.10537	1.25616	2.07893	0.651176	0.285638	1.10678	0.462648	1.20767	0.611288	0.680237	0.56985	0.843856	1.56275	1.75308	1.87482	1.47928	2.25718	1.21208	1.24441	0.690865	0.925175	0.85868	1.03779	2.26903	1.66822	1.89233	1.63548	2.3166	2.5888	1.28357	1.84362	1.87035	0.472819	1.20764
CAMK2D	3.48319	2.23286	3.115	3.28218	2.84669	2.47999	3.34379	2.866	3.95014	1.07233	3.29293	1.37899	0.979384	1.17013	2.02228	1.06252	2.67877	1.72986	2.21572	2.31121	3.32471	2.07877	1.92598	2.66288	2.97999	2.42301	2.10121	1.98518	2.39665	2.62431	2.91659	3.22201	1.76624	3.42363	2.53723	5.16103	4.01643	1.09573	3.40686	1.8659	1.92162	3.98886
CAND1	22.0931	27.4459	33.1153	31.7075	20.5949	28.7318	26.2205	21.8092	27.5642	11.94	23.6114	11.3373	16.4603	12.9434	13.4585	11.0732	13.0991	10.4962	11.061	24.672	22.501	23.1069	21.6813	21.5873	21.1303	22.2163	21.694	22.486	24.6695	22.8882	21.2135	23.4355	21.3544	26.5437	24.7255	30.4973	33.2383	12.2806	24.9159	31.7739	13.8866	30.6657
CAND2	0.767354	0.797899	1.41773	1.34988	0.942	0.837103	1.23246	1.52451	1.5081	0.401951	0.933254	0.24816	0.107051	0.215563	0.285475	0.197771	0.331289	0.219649	0.172361	1.11699	1.13568	0.904236	0.968104	0.956064	1.57237	1.32047	1.35745	0.791585	1.00392	1.04274	1.15369	1.13694	1.16611	1.23525	1.45671	1.24348	1.93124	0.265242	1.11762	1.08459	0.291751	0.869883
CANX	42.2172	45.8476	45.9626	51.0558	65.0029	48.3611	57.7905	58.2107	82.6363	107.809	44.0279	102.232	79.5124	106.485	77.8463	95.4976	94.6878	94.8939	100.07	72.6967	68.4114	61.5338	69.6364	60.281	48.6346	66.622	64.9481	56.5453	47.8177	52.9643	66.338	47.6973	51.2522	59.1703	57.4731	57.1779	60.9997	110.08	45.5511	54.8138	78.8741	58.8627
CAP1	19.0351	21.5244	24.9878	22.4944	13.8009	26.9	26.586	22.0934	19.0386	16.0698	19.6541	20.2942	12.3277	17.8052	19.4432	12.6977	15.7863	19.3512	14.4941	17.9748	20.755	24.0212	22.5009	17.137	20.977	25.5929	18.7393	23.5602	23.176	22.4317	15.0138	20.0511	25.3288	22.2406	22.4385	24.8287	24.7144	16.4204	20.3341	27.5554	15.7266	28.15
CAPN1	1.929	2.8347	3.37081	2.99738	2.27741	2.97398	2.68859	2.28727	3.33524	1.37524	2.79926	1.10864	1.06657	1.00699	1.28126	1.42729	1.20471	1.20718	1.22318	3.01184	2.97968	3.11857	2.19893	2.41513	2.97651	1.71018	2.98313	2.16586	2.6008	2.51195	2.33334	2.51989	3.09315	2.83468	2.72148	4.30768	4.49877	1.40524	2.8961	3.53362	1.30943	2.99955
CAPN2	4.63514	5.59555	6.53668	5.73618	4.20384	6.37049	6.52373	6.90736	8.82678	2.5616	7.9892	2.11473	1.30385	1.44989	1.71833	2.05793	2.54934	1.94385	2.05777	5.57837	5.33986	3.2981	6.60537	6.87142	5.72178	6.71841	4.90878	5.68034	5.8661	7.41032	4.49808	5.87797	3.5923	6.28295	7.43167	5.73135	8.5573	2.61749	7.99981	5.00025	2.17465	5.30869
CAPNS1	10.9304	13.0537	26.6318	31.2533	14.2912	13.4168	7.82329	10.426	14.0151	2.72421	8.07968	16.4212	2.49163	9.01193	6.66093	8.30853	9.5477	15.422	15.0554	8.07565	19.64	5.74043	3.73567	7.30969	5.39716	4.47223	5.95308	8.78356	10.7932	11.3172	14.6421	19.9947	5.25292	8.01008	7.82724	27.6807	21.7324	2.78365	8.35921	18.3476	6.80737	19.1322
CAPRIN1	7.28286	10.8591	11.7653	12.6174	8.62163	11.3927	15.0572	16.091	8.99899	20.5048	20.1097	26.5802	18.888	23.2275	24.4849	25.6744	28.43	29.8876	26.2045	8.02654	13.9535	8.86634	16.9762	12.7935	13.5299	12.9155	15.5128	13.7522	11.22	13.9757	8.83334	16.3045	12.6425	15.4168	17.8792	12.484	10.465	20.9522	20.918	9.68286	16.12	6.84631
CAPZA1	34.9544	36.2572	32.8396	40.3035	31.9077	38.0386	39.2534	43.5627	52.4694	24.3159	47.4277	34.1583	23.2408	34.6418	23.6253	36.5406	34.974	37.5176	39.4993	46.6718	20.7834	29.3303	49.3299	46.3797	39.8916	49.2737	52.8909	42.446	41.7844	42.0318	32.6913	38.5594	35.9479	34.0264	51.3989	41.8592	50.8724	27.5431	54.3444	40.6535	24.1447	32.1616
CAPZA2	11.3979	4.93037	6.54437	6.1573	3.57834	5.65847	7.35601	8.86065	13.7368	5.88817	6.81923	5.43449	4.53954	4.48034	6.61586	8.84707	6.07263	7.29016	6.46399	8.68213	7.31135	9.05755	9.87221	8.01695	9.18265	8.25717	8.70207	6.76232	8.37634	8.0691	4.73103	10.4897	12.2295	6.89381	8.84846	9.9868	10.2094	6.01664	6.51854	4.83732	6.76131	6.48896
CAPZB	11.1676	12.0224	24.4944	19.7087	17.5896	12.6131	15.6075	22.963	24.2596	20.8508	21.1404	19.7409	14.2359	17.47	19.6658	23.7733	21.4014	19.0636	17.7223	19.399	14.2553	15.3985	22.5379	18.7068	20.007	14.6974	22.6282	18.8436	15.5661	17.0526	18.0215	16.2026	14.1651	16.9933	20.5813	19.332	19.8105	19.6501	21.8718	23.6427	19.9065	20.7925
CARHSP1	12.4388	12.3952	13.5638	10.2351	12.8728	13.0043	13.0604	12.1558	18.0927	12.9775	17.2395	15.8974	12.3618	12.9532	14.362	10.0398	16.2267	9.27004	12.5263	13.8152	14.7039	13.7036	13.2001	11.5265	14.4523	18.9853	14.5306	13.2331	14.3693	13.0472	13.189	14.354	12.6828	13.3723	14.0583	13.0882	15.6736	6.00929	17.8359	8.30576	14.6777	7.52479
CARM1	5.80453	6.06234	10.0621	7.86059	5.62486	6.60144	5.66154	4.92607	9.01124	3.7474	5.54606	3.25167	4.31007	4.36777	4.42121	3.68794	3.67403	3.07382	5.05106	7.89531	6.05191	8.23849	5.9871	9.4352	6.78545	6.15791	7.83804	3.82707	5.56404	6.2484	5.76298	4.75004	8.3374	5.72088	6.06282	11.239	8.79335	3.82916	5.73793	6.59645	4.51841	7.71594
CARS	6.30616	8.13495	4.83285	4.19957	4.6465	8.53465	7.12107	6.5221	8.48563	2.45843	8.92188	3.96025	3.80111	3.28804	3.27712	3.9319	3.6146	3.76407	2.58235	8.67164	5.75144	9.48218	6.23801	5.23629	10.0852	7.15735	7.24394	6.03202	6.22139	6.02566	4.65223	6.62759	6.73327	6.03295	7.88286	4.48951	6.29491	2.51207	8.20799	4.87802	3.34917	3.35717
CARS2	28.7933	0.531351	0.902558	0.481595	0.471045	0.557459	37.5872	0.670545	1.03448	1.48719	0.823914	0.9712	61.5847	1.31936	0.414731	0.870718	1.81215	0.990067	1.66397	38.6539	0.368819	1.01983	0.886218	1.00957	0.943166	1.59115	0.706405	0.669855	1.00364	0.458275	0.591383	18.4084	0.734386	38.6481	1.0643	0.726532	0.765962	1.42825	32.0745	1.02147	0.423848	1.22047
CASK	1.50499	1.25769	2.02312	1.22708	1.00092	1.31949	1.40345	1.07001	1.13095	0.845186	1.51615	0.772584	0.839992	1.05426	0.457889	0.663227	1.10843	0.804641	0.744258	1.23142	0.930908	0.897429	1.64545	0.651199	1.29425	1.87158	1.25652	1.18574	0.691846	1.11169	1.0255	1.11982	0.775198	1.35581	1.5097	1.53124	1.37066	0.907812	1.62713	1.26155	0.467955	1.44106
CASP3	0.894036	0.590352	2.4686	1.96565	2.19218	0.619358	3.31081	2.83767	1.63257	7.43306	3.66139	1.18032	0.692488	1.24392	0.632716	1.29063	1.04797	1.64996	1.23109	0.866115	0.557309	0.920654	0.96871	0.621902	1.06073	2.39203	0.440246	0.375324	0.385831	0.406072	2.24601	0.830158	0.708965	3.38986	2.88077	3.41366	3.03379	1.03537	3.78806	1.8282	0.646625	1.62037
CAST	18.0446	22.7775	9.78591	14.6334	8.18669	11.9483	12.4636	7.7219	8.24715	7.00856	12.2618	6.83407	5.42765	6.66573	5.9163	6.6406	7.5388	6.11665	5.0256	9.60941	11.0986	10.3576	11.1089	7.02065	8.84115	11.324	8.10307	11.09	12.1632	12.1493	8.27635	13.7785	16.6698	12.7612	12.3137	6.99258	7.10653	7.74757	12.3484	6.16659	5.90135	4.18144
CAT	3.39302	3.56501	6.74729	5.85468	3.63059	3.74017	2.30673	1.63601	2.58862	9.02314	1.80842	11.1562	7.28416	10.1586	7.05041	7.70918	8.80823	11.4903	6.95309	2.14864	2.25719	3.04899	1.43078	2.92399	1.58474	1.60268	2.32517	2.2784	1.75385	2.40039	3.71974	4.55143	2.7859	2.3618	1.82679	5.50093	4.24454	9.22001	2.01049	6.97826	7.20541	3.47614
CBR1	24.8708	29.6138	28.1925	24.5055	19.7748	31.0688	25.6751	35.3144	32.6701	16.8951	39.8688	16.0716	19.1695	18.7272	15.1668	20.4038	19.9193	17.1054	16.0857	31.4181	30.2667	39.6549	31.7883	39.0849	31.888	38.9369	42.6627	22.7764	24.5166	26.6858	22.4685	31.0326	39.4915	25.7928	34.1824	27.3604	28.7642	17.5107	41.165	23.5537	14.1522	25.87
CBS	26.8625	28.6984	26.6845	21.4616	24.5635	30.1084	24.9077	23.3459	36.7387	22.3474	26.6543	30.5041	25.8899	31.5842	24.3303	29.4021	29.5523	28.0052	27.2528	22.8071	27.8594	19.4429	20.3216	24.403	20.6137	19.6643	23.0747	22.896	18.2797	22.6284	25.1667	28.4409	25.2636	25.5024	24.7919	18.0935	31.6955	22.9291	27.5764	24.6337	24.129	20.9406
CBX1	1.63515	0.410984	4.27585	3.19849	15.1405	0.431177	3.93417	4.97642	15.441	6.55046	3.31812	6.95376	1.11452	6.31729	1.76965	5.70867	7.6208	8.05597	5.9346	2.35164	13.1149	3.21768	2.53835	0.679257	2.12462	2.56081	1.22548	3.0051	1.25264	1.55265	15.5123	2.83132	0.980482	4.02811	2.95461	11.8679	5.33276	6.69338	3.43291	2.28108	1.80855	13.6527
CBX2	0.753123	2.57047	1.73542	1.51241	0.970261	2.69677	1.8948	1.99656	1.48509	1.31911	1.27868	0.8828	0.944267	1.75452	1.65057	1.69211	1.46096	1.6888	1.91508	2.66152	1.9479	1.49628	1.79438	2.65423	1.52651	2.06553	2.76971	1.91306	1.20718	1.41528	0.994087	2.50584	2.87764	1.94004	1.95183	1.35514	1.74434	1.3479	1.32291	1.54482	1.55328	1.05254
CBX3	63.9653	105.13	116.783	127.104	90.969	110.296	122.298	113.596	193.349	195.349	129.722	189.726	20.8318	201.038	116.832	170.141	167.207	213.974	212.051	110.044	86.0675	149.413	116.519	115.831	179.691	147.466	110.723	122.855	106.348	120.397	93.633	95.5846	101.883	125.218	131.197	130.345	141.893	160.977	134.21	102.318	119.401	116.022
CBX5	34.0429	13.509	53.6033	54.7775	40.4327	14.1728	25.7926	27.3368	38.642	21.1538	29.2252	45.2994	7.61795	32.1094	30.019	28.7204	36.3102	46.7513	45.122	10.786	25.5038	34.9097	20.9274	14.9363	36.4585	30.5791	20.1682	15.6362	17.3959	18.7417	41.4255	36.98	19.5019	26.4085	17.639	61.821	50.7192	22.335	30.2363	45.2524	34.4016	47.088
CBX8	0.896977	1.37194	1.24883	1.66818	1.22117	1.43935	2.00696	1.31704	1.31875	2.67996	2.08867	3.15157	2.40802	2.91022	1.9111	2.5228	3.33909	2.28729	2.8816	0.752051	1.0972	1.47409	1.62777	0.817779	1.6382	1.28941	1.34841	1.83604	0.777639	0.904134	1.02988	0.947009	1.55037	2.16772	2.58664	1.24357	0.843608	2.73843	2.30096	1.00115	1.95311	0.881644
CC2D1A	1.74561	1.90016	1.61988	1.85276	1.59584	1.99352	2.4774	2.13369	3.19478	1.1968	3.20036	1.44193	1.53107	1.21191	1.36953	1.13942	1.51044	1.44573	0.939838	1.99712	1.54574	1.86053	2.3179	2.32468	1.79394	2.20419	2.83809	1.98157	1.96907	2.09264	1.63502	1.97473	2.49598	2.53655	2.99601	2.08027	1.99383	1.22291	3.09963	1.85056	1.39964	1.73093
CCAR1	5.15304	5.03016	6.3521	6.6757	5.63131	5.27731	6.68775	6.55743	4.84033	6.02847	7.73167	5.15452	2.96814	5.63724	4.37724	5.37867	5.04612	5.94289	5.95328	4.6364	6.93431	5.66818	5.35336	5.21211	7.34671	5.42539	5.29041	5.50498	3.86148	4.71006	5.38495	6.60503	6.65245	6.68239	7.06781	6.09828	6.33932	6.00378	7.86168	4.52857	4.47347	6.1906
CCBL2	4.52477	4.68741	5.82859	4.46783	4.05781	4.91773	6.84157	5.41557	5.37385	4.14549	4.49302	3.45487	3.90409	4.43082	4.56069	4.79323	5.00745	4.48058	4.46407	6.71621	4.82873	5.55506	5.83918	7.99316	5.90226	6.71841	7.55926	5.58412	4.2976	6.22243	4.15745	5.64017	4.52295	7.00492	4.33263	6.25991	5.51933	4.23594	4.64847	4.24041	4.66095	3.67225
CCDC12	5.38631	4.47254	3.29585	2.53907	5.22943	4.6923	6.16561	6.9292	6.14798	8.0324	9.98681	6.90346	4.84932	6.51875	6.7458	9.18264	7.79608	8.27468	6.99208	5.75969	5.71386	9.64586	8.11216	1.44505	9.20056	8.21011	6.15124	6.98741	5.59661	3.88265	4.05692	8.51335	4.81204	6.31282	5.55937	3.83191	4.26273	8.20765	7.36611	2.90635	6.8941	4.6144
CCDC124	12.4359	19.1844	8.35529	11.4462	31.1221	20.127	24.5049	20.5812	22.1033	22.1028	16.6523	12.8079	18.0105	19.7206	21.8259	17.0699	18.0592	15.4035	22.2706	19.8915	16.2362	21.0146	14.4375	13.2438	19.9348	15.8796	17.9372	13.8433	15.2894	8.70585	31.8864	10.9508	11.9696	25.09	20.8436	4.15188	8.18384	22.585	17.2284	10.1023	22.3057	10.0683
CCDC134	3.35518	2.67791	2.42341	1.76062	2.84699	2.80949	3.42411	1.32699	1.55185	4.45473	4.3037	3.20275	3.85028	6.43294	4.55444	6.72009	4.24651	8.51189	5.80978	2.28378	2.03094	5.59143	2.72481	1.11171	3.86433	4.33916	3.09182	4.8132	2.92352	2.69495	2.9169	3.9642	3.53557	3.50586	3.69677	1.0885	4.35662	4.55192	4.45259	2.13038	4.65456	1.74258
CCDC22	1.41158	1.5843	1.41915	1.01744	1.30528	1.66215	2.38801	0.872823	2.54144	1.63224	2.72136	1.71329	1.02887	1.74866	1.5771	1.61699	1.46072	1.38164	1.59715	1.64555	1.53815	1.79429	2.16308	2.13927	1.94543	1.78989	1.98762	1.25658	1.63589	1.76594	1.33733	2.0343	2.40733	2.44502	1.80941	0.984483	1.08563	1.38039	2.749	1.14966	1.61177	1.28081
CCDC25	0.835424	0.806635	1.91161	2.11212	0.792071	0.846269	2.29578	1.72465	0.774129	0.274745	1.89701	0.31732	0.545927	0.174347	0.388316	0.467962	0.410706	0.539458	0.625555	1.18104	1.3514	1.21995	1.39246	0.526598	1.39563	1.86792	0.756209	1.03548	0.699094	0.822121	0.811521	1.49498	1.02338	2.3506	1.99913	1.47845	2.17048	0.280739	1.96264	2.66523	0.516545	1.73509
CCDC43	1.55723	4.16517	1.72566	2.26589	1.82035	4.36982	2.68972	2.11353	3.57536	2.16653	2.65815	2.05683	1.3381	1.84619	1.71559	3.27514	1.58928	1.72501	2.00613	5.29059	2.55007	6.91721	5.17733	2.36794	2.18955	3.98049	1.66955	3.84548	4.68704	2.67448	1.98679	2.34929	1.48071	2.97258	0.718832	1.17887	1.84672	2.2138	2.97957	3.55264	1.75331	3.70684
CCDC47	5.46756	5.03841	5.08416	3.52793	6.34827	5.28597	7.50034	9.34053	8.30771	18.7233	10.3386	19.5868	9.80262	17.8728	15.76	15.8424	20.0409	16.9753	25.6138	6.20346	7.43379	7.2414	8.31224	5.94866	6.07333	8.08724	6.89019	7.37818	6.97804	6.87019	6.0752	7.66587	4.06581	7.54135	7.94259	3.01288	6.23805	19.1318	10.6963	4.72365	16.8674	4.57141
CCDC51	5.00582	5.47317	4.81421	5.32175	1.95589	5.74209	2.39773	2.36081	3.33296	15.654	1.7802	15.1838	10.4982	16.7096	10.1697	17.0141	16.9961	14.8953	12.8012	1.5935	2.88863	1.50427	2.6787	2.03565	1.68805	3.23437	1.46065	2.97378	2.25485	3.23075	2.00392	5.19476	5.42986	2.45498	2.48214	5.03745	5.00867	15.9955	1.84179	5.6561	10.3933	4.00412
CCDC58	19.9859	20.101	13.3609	11.759	21.9465	20.4279	15.4787	22.2882	25.4455	34.7406	21.1347	29.236	11.5825	32.1959	25.4082	33.5592	33.6427	31.9433	29.0917	22.9638	9.00931	16.4977	18.7549	25.9878	19.645	26.3414	25.8022	20.6204	20.1137	21.9397	22.4854	18.92	15.4017	15.8482	13.5621	14.6244	13.9854	35.4986	18.9475	12.4153	26.3063	10.8326
CCDC6	3.50034	3.99547	2.83712	3.02743	2.29353	4.19179	4.79855	5.29901	4.9452	3.1259	5.31156	2.11096	2.61001	2.62611	1.83478	3.16023	1.31062	2.85925	2.01967	3.84903	2.58704	4.21159	4.48856	3.59763	3.88649	3.84376	4.02667	4.1089	4.693	4.25119	2.34985	2.59115	3.88626	4.70925	5.05825	1.82554	3.38719	2.89517	5.49532	2.67212	1.39863	2.34573
CCDC86	6.61765	8.11439	1.10927	2.846	5.37336	8.51309	7.72045	3.2597	2.79364	15.0762	6.81986	16.7205	12.5	15.1767	12.5572	17.3092	19.5192	15.6681	14.7404	4.58282	3.63218	4.65958	5.44574	2.48651	4.79724	5.46382	2.98426	7.06598	7.77718	7.44928	5.5053	6.89765	9.26485	7.90478	6.9632	2.58488	1.61056	15.5757	7.05581	2.54422	11.0872	2.34654
CCDC9	0.453232	0.361365	0.39568	0.162883	0.334595	0.37912	0.292603	0.482326	0.190361	0.59817	0.627379	0.514062	0.441901	0.202068	0.590621	0.4978	0.432314	0.288259	0.755794	0.389547	0.380992	0.401171	0.559181	0.599703	0.603971	0.191179	0.616668	0.486179	0.415044	0.284882	0.342811	0.374936	0.34201	0.29959	0.372458	0.257715	0.438571	0.611222	0.649084	0.148487	0.603605	0.206579
CCDC94	0.428729	0.373483	1.65301	1.2778	0.934578	0.391833	1.52404	1.18943	2.80417	1.62886	2.02634	0.954098	0.319198	1.2972	0.324752	0.631327	0.921151	1.30997	1.00771	0.599906	0.993151	0.532314	0.765965	1.06035	0.941504	1.3606	1.98235	1.13878	0.709858	0.381319	0.957528	1.02205	1.40203	1.56043	1.70438	1.86841	1.7136	1.95612	2.09645	1.25888	0.331891	1.1034
CCDC99	0.546256	0.497997	0.170016	0.15277	0.522988	0.522466	0.663183	0.477038	0.909612	0.699971	0.793731	0.511346	0.162955	0.569232	0.260749	0.462278	0.590927	0.387782	0.280744	0.460352	0.414625	0.376327	0.531112	0.617144	0.700109	0.360168	0.693201	0.41926	0.624323	0.445524	0.575246	0.357193	0.234894	0.510039	0.648641	0.311981	0.56962	0.546069	0.69288	0.270204	0.266481	0.32289
CCNA2	1.534	1.47208	1.56989	1.06286	0.736853	1.42217	0.798901	1.0598	2.25073	1.00556	1.4282	0.871106	0.725999	1.28082	1.68631	0.679343	2.26215	1.06142	0.494606	1.29353	1.05699	2.51992	1.12149	0.571487	1.5117	0.502907	1.66109	0.745448	1.02332	1.21359	0.754947	1.10735	1.39158	0.817976	1.23591	1.1674	1.45915	1.0275	1.47761	0.832867	2.4724	0.440538
CCNB1	4.90742	3.64747	3.44653	2.63897	2.33671	3.99607	3.54826	2.94022	3.24179	2.39051	5.39926	6.09208	3.85012	4.11747	7.94834	3.71187	5.34357	1.75804	6.13228	3.5716	7.77721	4.90135	3.45767	3.10627	6.97649	4.91378	2.72582	3.39587	4.02751	3.80394	2.39409	11.6317	9.0256	3.63298	5.0653	2.88538	2.57602	2.44267	5.58605	4.87646	8.12307	3.03243
CCNK	2.82954	3.32396	2.57385	2.16376	1.81158	3.48728	2.73559	2.8111	5.07987	1.91953	3.09994	1.51379	1.9042	2.11002	1.9998	1.43457	1.57484	1.90368	1.94625	2.96763	1.84359	2.86029	2.82157	2.97571	2.73858	3.64508	4.49382	3.2913	3.48515	3.28152	1.59063	1.93129	2.96403	2.8009	3.07049	2.66742	1.30762	1.96141	3.20719	1.67683	1.96051	1.96471
CCNT1	2.23499	2.00628	4.7476	4.68239	2.28438	2.10486	1.45232	1.68518	0.598263	1.10089	1.73053	1.43659	0.789428	1.34213	0.753145	1.01045	0.417564	1.38273	1.32238	1.58259	1.38978	1.32293	0.64901	1.23505	2.49652	0.944718	0.783051	0.666477	0.565579	0.479506	2.02082	2.69347	1.94378	1.487	1.19388	2.58962	2.7022	0.907223	2.04113	3.13156	0.769702	0.866098
CCS	3.02831	2.42599	72.1348	67.7675	2.65238	2.54519	2.73243	3.05096	28.1135	1.21083	2.76496	2.01301	0.684325	26.3204	1.64169	2.29324	2.72581	1.12844	2.54841	19.4074	1.75062	17.2488	17.3935	23.0758	2.33125	2.52282	22.6339	21.9167	17.7806	2.78782	2.71751	19.9917	17.9591	2.79767	3.49124	84.7449	101.17	1.9842	2.86062	98.4135	1.91098	0.944054
CCT2	123.771	137.265	129.16	122.962	127.784	144.612	147.679	127.335	157.119	118.335	142.959	108.519	120.298	115.969	132.469	124.656	124.74	118.034	118.051	127.704	146.29	100.987	121.576	143.166	114.695	127.213	134.082	138.158	155.381	161.396	130.945	134.723	91.565	151.23	138.76	124.102	163.514	120.953	147.46	125.765	135.325	140.989
CCT3	96.8311	80.2859	105.07	100.891	113.856	87.5394	112.913	114.077	104.354	76.7193	109.505	84.6962	69.4574	79.1408	90.6896	76.6317	86.6065	85.3484	96.1702	94.481	120.425	106.273	76.7378	106.263	119.872	94.6156	123.094	95.4366	94.8967	95.7498	105.069	125.381	114.009	115.725	112.709	103.181	100.109	78.2535	113.294	92.8437	92.4738	104.83
CCT4	75.9415	107.416	66.0412	70.992	78.7424	112.598	92.5478	94.0632	112.198	79.8275	85.6627	81.1502	93.2694	84.6939	70.2694	77.1266	67.2104	81.9179	85.7765	99.4182	79.2528	70.25	82.2541	110.371	95.6782	93.1752	89.0268	93.8746	96.5013	106.832	80.676	114.417	73.708	80.889	96.5519	65.3847	74.995	81.7089	78.2698	67.1011	71.8143	66.3991
CCT5	91.2669	83.9452	113.695	112.557	84.8594	92.6461	97.1833	92.7391	98.527	74.05	95.945	83.1181	97.4003	74.0942	81.1884	72.9372	82.6052	85.3803	78.3369	64.4284	84.0096	87.2702	64.1336	69.3414	88.503	90.2733	77.1297	77.1145	82.1667	85.2403	86.9893	99.8102	71.9195	96.6244	94.2511	126.15	155.436	74.8055	99.3364	128.512	81.2767	122.941
CCT6A	72.5375	85.96	119.404	97.2795	99.305	91.6042	78.6308	98.9548	121.102	78.5037	81.0436	88.0725	85.9563	75.7368	106.319	74.5423	80.8453	68.6932	78.0179	87.3893	111.594	68.6065	78.4021	100.384	83.8449	98.524	86.9435	86.4482	101.146	101.552	96.636	92.5119	71.0912	80.1199	80.4478	106.539	94.487	80.2165	83.4416	104.532	101.44	106.049
CCT7	73.0805	81.5562	87.0493	97.3641	73.5518	85.0795	78.5084	87.1052	64.4514	54.3626	72.4318	61.3069	55.3461	61.7595	63.3209	59.6589	65.9019	67.233	62.2381	80.5802	85.6857	58.6056	72.0209	79.4892	71.4511	78.5222	77.2785	86.2281	76.0997	93.422	76.0653	77.9353	73.6937	80.4941	75.4449	97.7203	81.0339	55.9133	74.7347	96.5161	64.713	80.4926
CCT8	74.6752	69.9198	91.1254	89.9177	64.3815	73.2362	88.901	87.5438	81.9018	58.0903	94.0025	57.9482	59.5382	62.5905	56.5237	54.4538	63.6771	59.682	53.8196	72.2266	83.1883	71.6565	93.0948	70.7945	82.7203	93.7843	79.5539	94.4136	86.7205	84.8921	66.7174	86.3725	71.7581	90.8328	90.5114	89.9686	85.3427	59.3908	96.4887	86.3819	55.6517	104.992
CD276	6.8863	8.58071	4.50995	4.52132	5.0774	9.00232	5.37271	7.51443	11.8466	7.63524	7.912	7.77111	8.79116	7.50869	8.49012	4.80455	7.57045	7.70336	8.75305	8.88905	6.07035	7.65018	10.0561	11.2091	7.06138	8.66656	9.4431	7.14873	7.98193	5.07448	5.20208	8.24884	4.71864	7.92918	9.27078	4.39487	5.45156	7.80183	6.03999	5.85029	7.57543	4.38948
CD2AP	3.00116	2.85179	1.65455	1.71175	2.28356	3.13785	2.02106	2.10982	2.53655	2.85257	1.88442	3.48172	2.18136	3.84869	2.49608	2.44008	3.39205	3.35521	2.90607	1.67143	4.17957	2.95639	2.79431	2.42929	2.4267	2.15696	2.59114	3.20684	3.50937	2.8687	2.33963	3.87207	2.09319	1.80587	2.71759	1.49775	1.11588	3.18307	1.74556	0.824581	2.67411	0.716356
CD2BP2	3.56797	3.17948	4.4722	3.73933	3.62737	3.3357	2.69118	2.07195	3.54475	9.06055	3.07153	8.19424	1.98483	8.06212	6.27036	7.33835	7.51852	7.36987	8.48301	1.97894	2.85085	3.32329	2.87037	2.43696	3.06385	3.02183	1.56297	2.72061	2.69752	1.6519	3.71644	5.33073	6.07403	2.75543	3.68434	4.34909	3.85003	9.25824	3.1778	3.81344	6.40821	2.59857
CD3EAP	5.65594	5.89396	0.353693	0.26233	4.03427	6.18355	7.17991	5.45749	3.46224	5.07184	8.88202	6.99777	5.39536	6.16377	1.93379	6.07489	5.34933	4.70912	4.79782	7.44413	4.55337	7.14746	9.0027	8.23638	6.79472	5.95818	7.90548	6.35238	6.21801	7.42075	4.13334	7.39294	5.98503	6.53096	6.97321	0.819393	1.08669	5.1825	8.93203	0.775267	1.97631	0.264635
CD55	0.862662	0.665055	0.645267	0.295166	0.619481	0.697732	0.294581	0.195928	0.181604	0.293077	0.645223	0.540211	0.574388	0.624568	0.627156	0.636106	0.48961	0.36352	0.183945	0.593876	0.491927	0.333731	1.08639	1.84714	1.13113	0.333502	1.51709	1.2287	0.60506	0.782432	0.634693	0.934966	0.74566	0.301614	0.184933	0.351604	0.869913	0.502781	0.667546	0.52922	0.640944	0.528548
CD81	32.3453	28.69	13.8856	18.0489	19.6818	30.0997	26.2651	28.45	45.6626	15.3122	30.0085	12.2527	9.38009	16.2813	15.3587	9.1972	13.6926	15.8269	8.61518	39.8543	22.978	69.012	19.7074	24.1081	55.7519	31.7843	33.3782	23.3097	31.4992	30.3733	20.1651	46.8858	47.1805	26.8922	34.2034	8.96728	21.2211	15.6463	31.0467	13.0081	15.6964	8.49396
CDC123	2.17658	2.31126	0.968404	1.27611	1.27986	2.42482	3.8708	1.73637	2.29268	4.24766	3.33944	3.67015	3.24596	2.62693	2.95672	3.99626	3.89792	3.11692	2.63685	2.78996	2.23531	3.77011	2.59489	2.61942	2.96646	2.85844	3.37889	2.33913	1.84993	2.77484	1.31129	2.89238	2.36235	3.96322	2.14409	1.24994	0.582789	4.34034	3.45498	1.68862	3.02172	0.722986
CDC16	0.530623	1.45631	1.28308	1.68654	0.797019	1.52786	1.70265	0.749528	1.23942	1.42409	1.11979	1.0066	0.537119	1.51286	0.437483	0.269261	0.523561	0.767466	0.464086	1.68136	1.11118	1.94212	0.78424	0.379229	1.8389	0.669959	0.849788	0.163305	0.400924	0.21556	0.816591	1.25144	0.767128	0.760864	0.789234	1.47709	1.25892	1.45516	1.15853	1.0886	0.447101	0.856406
CDC23	0.444176	0.700238	0.838427	0.949204	0.622645	0.734644	0.790271	0.807275	0.649697	0.248843	0.996973	0.107029	0.568113	0.396839	0.452187	0.293115	0.363662	0.163077	0.252834	0.548785	1.29175	0.709891	0.417169	0.850045	0.544147	0.440347	0.393023	0.4594	0.519465	0.540682	0.637934	0.756206	0.663857	0.809139	0.327518	1.00905	1.34278	0.254273	1.03146	0.731592	0.462128	1.06185
CDC27	1.1246	2.04643	1.0911	1.12265	1.40018	2.14698	1.6939	1.03804	1.20955	1.95148	2.51154	2.12492	1.85933	1.73153	2.01351	1.78559	1.94087	2.09472	1.71798	1.84351	1.49824	2.72314	1.52365	2.51934	2.21763	1.18565	2.09424	1.52293	2.03242	1.93947	1.43456	2.0819	1.98199	1.73434	1.42795	1.0501	1.32944	1.99405	2.5128	0.480551	1.83746	0.596793
CDC37	35.8012	46.7283	16.3426	14.3702	74.2625	49.0243	38.2404	40.6463	43.7087	34.3442	43.8653	17.5227	16.2065	28.9827	32.689	25.5798	30.6082	30.0202	30.6834	48.0261	59.553	45.2844	33.4307	55.3516	35.3546	39.98	47.564	22.1862	42.0009	47.1419	76.1245	37.9785	37.0789	39.1534	34.4478	15.4261	20.831	31.6249	45.3829	16.3301	33.4076	23.9369
CDC40	1.51979	1.85546	2.2261	2.55006	1.10415	1.84796	1.40953	2.07516	2.00531	2.00896	1.30677	1.71455	0.753053	2.34695	1.16175	1.55521	2.03786	2.0615	1.40666	2.00496	1.34876	2.11214	1.50724	1.25078	1.29335	2.23392	1.66565	1.10623	1.2694	1.42156	1.13126	1.70041	1.62692	1.44318	1.72271	1.73172	2.58076	2.0528	1.35198	1.74946	1.29834	2.40905
CDC42	13.566	20.8157	25.971	29.5397	21.7374	21.8385	18.7891	19.3465	33.4904	20.5774	8.89847	23.8075	34.7593	16.2377	31.2602	19.0955	20.4552	28.0091	23.0717	13.2859	44.366	1.26428	7.0116	13.5881	9.90159	9.22732	11.9291	15.3439	10.6034	18.2989	22.2711	13.6831	3.07974	19.2378	14.3501	26.7334	22.7672	21.0264	9.20633	33.2831	31.9475	30.8157
CDC42EP1	0.742684	1.91629	1.01437	0.875892	2.08415	2.65439	1.89642	1.88497	3.52043	2.39583	2.35095	2.22149	1.58477	2.31058	2.05638	2.30302	2.4207	2.61644	1.2634	1.30019	2.69915	1.36342	1.11479	2.51659	2.84756	1.66534	1.40394	0.483655	1.98234	1.58007	1.76506	1.84331	2.62676	1.9417	1.34052	1.19206	1.21913	2.44811	2.43228	0.808121	1.92084	1.15326
CDC45	1.12088	1.21909	1.50618	1.08491	0.849869	1.33014	1.37371	0.974873	0.751244	0.646089	0.954135	0.626247	0.087251	0.303721	0.670271	0.496143	0.698345	0.513538	0.718405	0.286061	0.65118	0.936638	0.312851	0.93941	2.05235	0.501312	0.185059	0.831194	0.971011	0.592294	0.837251	1.22046	1.22152	1.35241	0.54357	1.50221	1.21792	0.634792	0.949176	1.71787	0.820465	1.34052
CDC5L	19.3311	19.133	13.3076	13.5726	19.6841	20.0731	19.653	19.6906	22.4118	18.8615	19.3194	18.5513	15.6646	19.9197	21.2524	17.3715	18.6787	21.3674	19.3254	25.0735	17.7543	23.509	19.6889	22.8261	19.6115	22.9541	22.973	17.9085	21.1504	17.3712	20.1675	23.8135	26.8075	20.104	18.6113	13.0609	17.0754	19.1127	19.9877	12.7233	21.1291	12.7702
CDC73	2.27704	4.31909	8.40912	8.03273	5.85433	4.69957	6.96799	5.41279	6.99409	4.40976	8.40429	5.27536	5.74041	5.24582	5.93526	4.05472	5.36583	3.14338	2.60764	5.13124	6.04766	4.98544	5.20174	4.52923	4.23276	4.49576	4.38099	5.27894	5.17976	5.75982	6.30554	4.44584	3.1227	7.13726	3.60617	7.81262	8.66662	4.32203	8.69505	9.95901	6.06575	7.59164
CDCA5	4.73795	4.81744	3.43346	3.48543	4.91945	5.05414	7.56898	7.76947	4.86408	2.89142	7.30012	2.33957	3.55723	3.60515	3.38228	4.12281	2.81664	2.91568	3.81189	6.0276	5.60327	5.59794	6.67032	4.91403	3.56251	3.88559	4.88599	6.02291	7.48505	8.3188	5.04025	9.06386	5.60194	7.94088	6.66097	3.9706	3.74325	2.72667	7.55268	2.87343	3.45663	2.04068
CDCA8	3.91435	4.01567	2.22397	1.77668	3.07608	4.21297	4.26935	6.31825	3.35981	3.1649	4.64893	2.93749	3.32808	4.05022	3.39401	2.85894	3.36948	4.18472	3.45627	4.5596	3.27165	3.01412	6.08959	3.89296	3.73976	4.98201	4.6624	3.15275	2.83812	2.73411	3.15162	3.73402	3.5364	4.37129	4.03324	2.77317	1.50995	3.23395	4.80977	1.87614	3.72289	3.05772
CDH2	2.29478	2.41499	1.59847	1.42112	2.67405	2.67032	3.02077	2.98501	5.05269	4.04311	3.42872	4.28115	4.2402	4.2081	4.67341	3.63093	4.55327	3.80041	3.71081	3.46611	2.46004	3.67217	2.87979	3.88981	2.00366	3.23124	4.46952	1.97569	2.95887	2.5761	2.73971	3.01469	4.32939	3.09289	3.37367	1.06648	1.5537	4.4079	3.54735	0.980887	4.77615	0.709391
CDK1	16.5681	14.1149	22.0794	22.2485	14.5993	14.8085	11.1398	17.4076	17.5222	10.4729	16.5681	15.5806	10.3021	10.8146	9.44101	14.0974	14.1179	13.7845	9.09734	14.5989	14.2877	12.9451	13.1414	15.9651	15.6838	16.6155	18.2669	13.9853	10.6119	11.5604	14.9578	16.3104	11.1577	11.4057	14.8031	20.2785	14.8956	10.7014	12.9332	16.8195	9.64856	16.2786
CDK11B	1.83177	2.06723	2.6507	2.67548	1.37529	1.72396	1.56002	1.56263	1.93887	0.912746	1.79267	2.04947	1.49111	2.05938	1.54925	0.994113	1.7854	1.72176	1.70452	1.07361	1.87903	1.65324	2.01029	0.82759	2.27444	2.08258	1.22111	1.72109	1.37267	1.73302	1.40906	2.70168	1.76066	1.59727	2.08604	2.34154	3.17925	0.836425	1.85469	3.23989	1.58331	2.1404
CDK12	1.00307	1.39142	2.20297	2.67371	2.36205	1.45978	0.869155	0.661487	1.3483	1.1999	1.12428	1.63344	0.78216	2.48852	1.95638	2.12909	2.05373	2.42916	1.63077	0.82122	1.94729	0.876907	1.23821	0.636373	1.11073	0.639659	0.954218	1.03239	1.01091	1.74054	2.45522	2.63805	1.94129	0.889907	1.02576	2.10857	2.01224	1.27761	1.22838	1.18458	1.99939	2.69459
CDK2	7.92848	7.91398	10.1272	7.70459	6.64602	8.30283	6.32729	7.82707	4.23922	4.54805	12.8728	3.62652	2.63021	2.01264	4.24753	2.77137	3.72461	3.81087	4.69462	6.70823	6.01333	8.25184	5.78836	8.90254	6.80786	5.70146	6.22658	3.67884	6.99035	7.86761	6.80922	9.0124	7.60577	6.47836	8.81043	7.56536	9.2174	4.64728	13.3843	10.7834	4.3409	9.45409
CDK4	8.86136	13.0418	9.11905	8.42849	7.74605	13.6826	8.81068	8.65233	8.82923	5.93969	9.94505	10.2659	6.17237	7.81114	6.75172	8.40637	7.24617	7.64278	7.22957	9.15612	8.24095	8.44988	10.4257	9.95999	6.83839	7.33198	10.0965	9.0039	8.5104	8.96952	7.93626	8.01717	9.50244	8.07969	7.90867	6.74751	9.46424	6.28734	10.2891	9.00766	6.90015	9.48119
CDK5	5.4606	2.43806	3.0459	2.23115	2.74226	2.55785	3.40514	2.79617	1.86379	2.12135	2.61	1.60138	1.20711	2.04713	1.91186	1.78874	1.74247	1.39695	1.33601	4.78512	2.77936	5.25206	3.53575	2.33019	6.76741	3.93265	3.80949	2.87642	2.65621	2.62254	3.30569	4.54044	6.25822	3.48644	2.32971	5.11953	5.57928	2.39547	2.84052	3.41995	1.95389	3.02285
CDK5RAP3	1.57576	2.36169	2.15334	2.4331	1.86676	2.47773	2.69539	2.34192	2.10619	1.6513	3.02161	1.7292	1.70287	2.1264	1.36471	1.60284	2.07283	2.02286	1.52503	2.48553	1.58564	1.59502	1.40399	1.15635	1.91143	1.13736	1.29552	1.55909	2.09597	1.66415	1.9126	2.37373	0.975237	2.75975	2.15188	1.51877	1.63558	1.68733	3.12615	0.583917	1.43662	0.889223
CDK9	2.59862	1.43719	2.96632	2.6286	3.14145	1.5078	1.36374	1.43022	1.41555	0.325311	1.13941	0.414886	0.667173	0.169027	0.546136	0.842093	0.527483	0.86662	0.21529	2.22684	2.46318	2.10713	2.22451	1.67598	2.33627	2.02867	1.92113	2.27574	2.08028	2.19909	2.92235	1.96642	1.77918	1.3963	1.8329	1.67348	3.36868	0.332408	1.17883	3.29995	0.558142	3.2055
CDKAL1	0.896859	1.23331	1.03715	1.19957	1.14538	1.29391	1.47963	1.49482	2.47705	2.25632	1.71237	2.40345	0.858056	5.25296	3.05793	2.37531	3.13209	2.86442	1.96354	0.916676	1.34512	0.806647	1.24716	1.19557	1.38868	1.41283	1.03759	0.712463	1.22603	0.727986	3.94455	2.20758	1.66157	1.51496	1.7521	0.720562	1.5343	2.30555	1.77161	1.38945	3.23363	0.807943
CDKN2A	159.715	128.082	128.418	125.611	129.653	134.375	153.057	139.013	259.827	194.417	146.729	168.35	206.735	208.468	196.178	144.745	192.293	163.701	191.516	172.518	94.622	135.574	163.367	158.526	144.015	152.495	166.228	131.831	142.171	118.996	117.449	145.948	113.05	156.712	150.653	94.7735	108.272	198.658	151.805	95.3586	200.49	122.012
CDS2	0.956333	1.51236	1.09252	1.67102	3.21979	1.58667	1.56707	0.848618	3.01792	2.3877	1.7547	2.90153	1.69426	3.26978	2.1872	3.96836	3.33325	2.51633	2.37342	1.57965	3.67026	1.80714	1.6293	2.03801	1.24584	1.77995	2.23306	1.28983	1.21804	1.52327	3.29885	1.95019	1.90094	1.60449	1.13372	1.32784	2.05158	2.4398	1.81541	1.45262	2.23528	1.31929
CDV3	33.5273	44.2044	18.3126	23.8899	45.7034	45.9413	51.7498	49.1384	57.9172	46.7475	57.9372	44.4845	27.4677	37.132	30.7229	45.6617	43.2575	44.8817	54.1981	35.8083	42.3537	27.4099	41.6058	43.6584	36.7407	36.8795	45.8969	48.9861	66.9563	52.2619	51.1321	53.3192	65.4956	52.9854	61.0527	24.4101	24.4113	47.7674	59.9416	24.2722	31.0611	21.7898
CEBPZ	3.9022	4.01005	4.90869	4.34849	3.71095	4.15818	5.09053	4.36859	4.57728	6.88747	6.26215	4.65763	5.27052	6.2172	4.96223	4.70679	6.08187	4.78512	5.39183	4.39003	4.69221	4.08112	4.51885	3.74313	4.44106	4.49158	4.31807	4.58736	5.09774	4.44324	4.15538	5.13162	4.94068	5.21208	5.15906	4.439	5.04823	6.76808	6.4788	4.38399	4.94267	5.20327
CECR5	7.22945	4.10219	16.5005	15.6028	5.7957	4.47715	10.4825	9.46451	9.0953	16.8332	11.0182	18.8726	20.3301	21.3189	22.2327	21.0289	18.7947	19.2727	20.5745	5.13768	8.03901	7.96753	4.83219	3.3662	9.15199	6.52339	10.4548	3.08405	5.14441	6.76413	5.93802	10.1374	9.0726	10.9046	11.3615	14.224	13.8014	17.2005	11.3994	13.0692	22.8414	15.1179
CELF1	8.43658	2.70575	25.6137	18.8419	13.3211	2.8387	7.51647	6.03538	3.66334	8.15111	6.64649	15.0512	3.80823	9.15545	13.6317	8.446	11.7346	13.328	12.1534	4.17318	12.4698	3.40972	3.89503	3.35106	6.41367	4.92241	3.90687	3.9026	3.8597	3.52394	13.6482	13.6425	7.19053	7.69593	7.77984	21.5116	18.0892	8.94505	7.02438	20.0215	13.5975	19.7799
CENPB	0.495466	0.579154	0.54373	1.06808	0.810438	0.60761	0.15721	0.165448	1.54556	1.23645	1.33778	1.01263	1.58265	2.95501	1.40352	3.31905	2.98451	2.7133	2.01412	0.939536	0.341535	0.305633	1.71832	1.09858	0.354409	0.96741	0.529606	1.08957	0.111493	0.428386	0.830339	0.916718	1.05096	0.160963	0.638106	0.845784	0.746567	1.40156	1.38406	0.638458	1.43438	0.953088
CENPF	0.211522	0.245527	0.147435	0.163567	0.140235	0.245291	0.382234	0.32252	0.454741	0.270946	0.570703	0.39627	0.0440941	0.384681	0.262931	0.282506	0.300834	0.381871	0.226679	0.26092	0.304064	0.263337	0.215635	0.222106	0.438773	0.231415	0.291702	0.276046	0.232992	0.193963	0.143679	0.400587	0.364107	0.407192	0.504898	0.159185	0.25164	0.276858	0.579881	0.147653	0.268711	0.170609
CENPH	1.54753	1.01124	0.426934	0.805424	1.07386	1.06093	1.21268	1.09784	1.18156	0.116428	1.25229	1.02131	1.22153	0.740762	0.939462	1.72146	1.48732	0.951362	0.0600346	1.16359	0.759502	1.09418	1.29632	0.618795	1.20291	0.719656	0.242105	1.30111	1.6169	1.4996	1.10023	1.1502	1.76933	1.24164	1.00016	1.23201	1.27115	0.118968	1.29562	1.48165	1.20522	0.266388
CENPV	6.08975	7.74751	9.15632	9.73641	11.2889	8.12817	8.60322	10.2893	7.28016	11.419	11.5073	18.1376	14.5382	17.9006	18.7579	17.3456	14.8543	15.5336	15.8736	9.88852	13.8421	9.84257	8.62339	10.4244	9.59037	7.92097	11.491	5.61714	4.4952	4.91982	11.4516	11.8464	9.2232	8.70906	9.56765	14.1484	10.163	11.6682	11.9054	11.1963	19.0582	11.8985
CEP170	2.81974	1.85355	2.51836	2.47306	1.98333	2.09244	2.18735	2.30616	2.9474	1.13399	2.51395	1.77799	1.71926	1.57928	1.32074	1.7492	1.75123	1.83239	1.58247	2.12429	2.11216	1.86153	1.94701	1.98	2.19122	2.24074	1.84654	2.61243	2.32257	1.78125	2.07911	2.57699	3.01186	2.21933	2.40924	2.44556	1.98954	1.15873	2.72426	1.9462	1.34977	2.30129
CEPT1	1.94409	2.48431	1.85363	1.89971	1.5175	2.60637	2.34449	2.15908	2.19343	2.13164	2.31184	1.92134	2.45736	2.17224	2.66034	1.98062	2.13123	1.78993	2.07792	1.97824	2.16624	4.32939	1.78294	1.75693	4.41954	2.52593	2.42614	1.96051	2.27709	2.5639	1.55476	1.76454	1.90913	2.40047	2.29168	1.70023	1.71812	2.17814	2.39183	1.53281	2.71882	1.50158
CERS2	4.2967	4.56946	5.55639	3.62445	2.47734	4.79398	3.81504	4.78817	4.31186	5.03277	3.23187	4.33164	6.94972	4.75844	4.52538	5.13876	4.7437	4.87822	5.15695	4.04783	2.17637	4.61103	4.59794	5.74142	3.73371	5.25625	5.14932	3.56307	3.14316	3.32579	2.53817	3.54234	2.84987	3.90613	4.04788	2.4562	3.25826	5.14257	3.34368	3.94779	4.62487	2.63669
CFDP1	5.17852	6.70923	6.14918	6.99262	4.0246	7.03888	5.15796	5.109	5.24261	3.5409	5.27448	2.91033	3.54431	3.52572	2.79071	2.54399	3.52432	2.49758	3.46035	8.05816	6.3767	7.32616	7.6021	6.76013	6.8733	6.10929	7.61521	5.74069	5.12792	5.29663	4.12343	6.52873	5.53074	5.28111	5.36406	7.03135	9.80321	3.61816	5.66114	5.62685	2.85206	5.77769
CFL1	326.07	363.205	371.039	400.952	356.2	381.051	279.84	310.376	392.712	304.201	280.318	276.402	227.259	219.223	335.289	316.67	288.112	197.841	273.303	356.194	383.351	357.49	317.26	339.707	323.659	315.908	371.474	285.365	331.078	341.866	351.644	326.357	285.058	286.521	294.165	416.281	452.434	310.463	290.016	400.007	341.013	377.098
CFL2	15.0293	14.5296	10.9033	18.5737	10.92	15.2435	12.1512	14.2457	18.5318	9.39799	13.9245	10.2439	8.89117	14.2028	15.1756	10.512	13.6073	12.8447	15.8687	15.1669	14.1702	17.1554	17.1966	21.7328	18.0721	17.6798	18.656	16.1576	20.2785	18.4941	11.1882	17.6256	14.5579	12.4413	16.9469	16.2069	18.0275	9.60304	14.4062	18.797	15.5092	15.8893
CGGBP1	8.993	8.94855	8.20561	6.85222	9.09016	9.38823	8.88037	11.8091	14.8288	8.23457	9.02945	6.99211	3.61766	6.39033	5.99623	5.16512	6.7354	7.60452	7.71189	6.19828	13.12	10.9698	12.0737	12.0603	7.70032	10.542	10.802	9.38974	8.54872	8.80384	9.31337	10.1948	8.71218	9.0924	10.2578	9.75747	8.8004	8.41424	9.34184	9.58221	6.12805	11.5471
CHAF1A	2.92138	2.43794	1.7269	2.11834	2.38469	2.55773	3.51309	2.83455	5.40242	2.50059	3.06179	2.55868	3.63637	4.18938	3.64697	3.75432	3.35456	3.74047	3.30991	2.13884	3.22395	2.71847	2.66305	2.06023	2.61002	2.89086	3.42956	2.58434	2.61768	2.94327	2.44324	3.65337	2.45539	3.29544	3.5811	2.09091	2.08828	2.67197	3.16772	1.69552	3.42705	2.64355
CHAF1B	1.19164	1.24084	4.60484	3.25682	3.08635	1.30181	1.34397	1.81843	3.41947	1.43136	1.76381	1.57013	1.25449	1.59972	1.26021	1.24866	1.33287	1.5195	2.05769	2.37458	2.53498	1.04836	2.18563	2.3062	1.57817	1.10754	0.965124	1.17475	0.765088	1.17566	3.16214	1.93831	1.16042	1.37606	1.72639	3.56609	2.38769	1.20373	1.82483	3.2935	1.72406	4.76932
CHAMP1	1.45922	0.831241	1.92965	1.765	1.80401	0.918336	1.81222	1.46615	2.21784	0.93023	2.02786	1.33655	0.932512	1.09717	0.9475	1.04902	0.987996	1.13041	0.969452	1.78615	1.77199	2.01353	1.5318	1.70591	2.09937	1.91223	1.51824	2.6612	1.46061	1.78599	1.84831	2.41203	2.10019	1.85549	2.06813	1.87168	2.13147	0.950526	2.09802	1.64725	0.96833	1.65921
CHCHD2	44.5313	55.3974	51.7953	39.7064	27.5448	58.1193	57.9234	51.2578	100.918	81.7917	79.2213	63.1559	108.634	74.2888	65.6532	72.152	76.5174	68.2405	68.0208	67.6196	32.3843	72.2071	88.812	85.5511	65.6632	59.9295	70.6838	52.4079	49.5674	48.9955	27.9132	52.2969	56.3031	59.3064	66.9636	45.2537	40.7473	83.5763	81.962	35.6031	67.0965	38.5291
CHCHD3	16.1222	19.2621	16.7407	12.2746	25.7135	19.361	22.4124	22.0647	33.4389	40.9254	27.3453	33.8552	20.2109	48.9731	44.1573	49.5633	47.6935	47.1849	36.1307	19.5599	21.6037	22.0674	26.4504	18.2729	22.3077	19.161	16.8893	22.2659	20.632	22.3097	26.3449	16.3382	14.336	22.9476	27.3349	18.7796	15.7585	41.8183	28.2913	24.2678	45.1281	13.8578
CHCHD4	15.146	15.8072	10.0437	8.39775	26.3259	16.5838	33.8829	35.8972	44.6293	37.0905	43.2642	41.4622	6.36062	34.7312	3.57307	42.8809	36.8523	35.8559	28.1356	18.7946	13.753	18.7855	17.6577	8.94206	15.7572	13.0266	31.4324	21.9736	18.0805	19.5236	26.9724	20.5093	34.5926	34.6919	35.8289	8.72612	10.1565	37.8997	44.761	8.3647	3.65162	8.60561
CHCHD8	10.7246	17.1743	7.9098	5.79566	11.1352	18.0182	14.9219	13.1088	15.1439	24.8879	15.2362	24.2181	14.3897	30.9906	13.0637	27.2908	27.1176	28.676	23.2855	13.9158	10.2256	12.483	17.5635	10.5294	11.5215	6.36261	5.49422	22.5657	22.4035	19.9406	11.4086	18.8478	25.7395	15.2782	19.8733	5.37489	7.36285	25.4309	15.7633	5.38517	13.3509	4.68911
CHD1	0.557557	0.644751	1.35147	1.10551	1.18218	0.622442	0.859997	0.754681	0.768318	1.02412	0.942303	1.58786	0.912743	1.30682	0.706949	1.09511	1.47785	1.41946	1.37337	0.710682	0.901458	0.920504	0.832251	0.522823	0.795114	0.765406	0.923232	0.540458	0.464534	0.577064	1.23464	0.981734	0.581081	0.94019	0.81575	1.25522	1.35799	1.11484	0.941647	1.28713	0.788853	1.47493
CHD4	8.6818	7.36496	8.62033	8.73203	10.3945	7.86312	13.5232	11.39	13.0447	8.61662	13.4372	8.90219	6.20449	8.82181	4.89589	8.28023	8.16582	7.45659	8.40062	8.7837	8.05015	8.56301	10.0454	9.31014	9.50187	10.6189	11.2678	9.32597	9.62193	9.3666	10.1229	9.53946	9.11034	13.7257	12.1315	8.64658	10.3895	9.04283	13.743	7.44082	4.7785	9.16503
CHD7	0.112039	0.217897	0.0813698	0.0475954	0.190162	0.252475	0.229587	0.245603	0.33705	0.404728	0.325389	0.365343	0.155679	0.495209	0.402844	0.390562	0.36573	0.485692	0.299728	0.0254457	0.141358	0.0777832	0.174289	0.0179616	0.197893	0.132598	0.416154	0.0817833	0.0679394	0.129651	0.169616	0.158661	0.103767	0.149803	0.193793	0.0223179	0.0502762	0.370454	0.2876	0.0451134	0.350751	0.0569468
CHD8	0.433041	0.479533	0.400554	0.374387	0.273859	0.426388	0.572005	0.435476	0.631268	0.149417	0.710144	0.121672	0.106515	0.190187	0.0119618	0.146311	0.0943879	0.260043	0.105577	0.576514	0.309999	0.890455	0.443219	0.390908	0.738613	0.450151	0.548047	0.448525	0.382097	0.490742	0.318679	0.5704	0.630592	0.579191	0.574394	0.401629	0.366203	0.152677	0.787935	0.383646	0.0343388	0.131586
CHEK1	0.624314	0.408367	1.21794	0.841312	0.777978	0.428432	0.461693	0.76643	0.175238	0.454776	0.749818	0.992388	0.156616	0.93636	0.46506	0.705534	0.576816	0.57882	0.26074	1.0389	0.702151	0.753238	0.583144	0.0912846	0.607874	0.517312	0.607457	0.255454	0.284051	0.352708	0.797082	0.527413	0.317527	0.472717	0.809408	0.520034	0.72715	0.464698	0.775759	0.974247	0.475284	0.673801
CHERP	3.9907	3.35228	7.95181	8.14415	9.29706	3.517	3.80807	3.73874	5.57683	4.00951	4.27339	4.69888	5.30198	4.49394	3.27493	3.96149	4.74276	6.38407	4.66411	3.04934	7.24218	2.37709	3.40466	4.11377	4.49478	4.6019	3.91233	4.83825	3.92106	3.16287	9.52535	4.89194	4.77668	3.899	4.04114	7.80243	6.53107	3.90084	4.42124	7.53313	3.34692	8.96649
CHID1	0.63733	0.859373	2.39436	1.91293	0.960216	0.901598	0.815263	1.24973	1.18637	1.13665	1.40422	0.566957	0.694756	1.12219	1.02453	0.581872	1.40635	0.797308	0.963007	1.53628	1.66251	2.17654	0.933522	1.46369	1.51209	1.44797	1.076	1.03641	1.04358	0.838216	0.983795	0.798135	0.727502	0.834729	1.39751	3.64071	3.06872	1.16145	1.4528	2.35593	1.04705	3.13559
CHMP4A	2.8215	1.97043	0.97077	1.33136	1.84134	3.92335	3.51811	4.18464	4.07681	3.17519	4.36704	2.86701	3.33106	2.5206	2.61746	2.93301	2.33437	1.14112	3.23526	3.79894	1.39464	2.26864	3.8496	4.13933	3.82788	3.37894	4.04193	4.32868	4.26126	3.94601	2.2053	2.48259	2.84203	3.27129	3.2933	1.84083	1.78457	3.24446	4.51813	1.91017	2.67501	1.70546
CHMP4B	3.39145	5.22101	3.86214	2.68554	11.5767	5.47754	7.59816	4.31065	1.22155	2.91164	6.96856	5.42003	1.99311	6.39657	3.8132	5.2729	5.17855	6.3828	4.36364	4.56127	10.1689	4.32805	7.85166	1.9686	4.65052	7.75889	1.3564	6.16278	8.62022	9.57635	11.861	5.54794	8.93648	7.77957	6.27646	4.47977	3.73741	2.97516	7.20965	5.43956	3.89703	10.4866
CHMP5	19.289	23.9193	12.3392	11.1719	19.9899	25.0945	14.0677	22.4038	26.1474	5.84486	24.4143	6.99085	12.51	15.7681	14.9464	13.4821	8.89504	3.29017	12.7262	18.4309	20.1514	25.7297	23.2295	26.849	12.1346	23.1018	28.3734	21.2429	18.8574	21.5226	20.4808	14.6014	25.8937	14.4036	15.4436	9.31337	14.9573	1.74578	25.259	13.6075	15.275	21.1285
CHMP6	2.29802	1.15314	2.4857	1.74379	1.2534	1.2098	3.94884	2.67321	3.85416	3.97821	3.96454	0.700343	0.530115	3.03789	0.459698	2.69083	1.40532	3.6234	2.78411	2.75694	2.21455	1.6364	2.71673	1.60675	3.58106	2.00237	1.3136	2.53746	2.30251	2.16839	1.28418	1.75276	2.43415	2.91989	4.00543	2.23725	2.28939	2.96237	4.1017	1.4713	0.469804	2.83406
CHORDC1	33.2215	34.8804	35.5261	32.3176	53.5402	36.5943	44.9619	50.2036	36.5632	23.4036	41.3292	25.3938	25.615	26.1145	16.703	27.5326	26.3481	24.3994	20.798	49.0781	33.8852	40.1088	30.6002	48.7627	46.1818	46.5288	38.4546	43.4557	39.2702	32.4689	54.563	41.2768	38.4057	46.1939	39.4938	34.9392	39.1604	23.096	42.3951	34.0527	17.0702	54.8827
CHP1	2.66919	4.43478	1.94166	2.20817	1.9274	4.65268	4.11967	5.25516	7.15937	10.065	4.86591	11.5592	7.91233	10.3142	7.26412	9.40421	11.4031	11.519	10.2297	3.97788	3.09918	4.14552	3.59213	3.06045	3.93493	3.28509	3.35402	2.31977	4.84453	4.47551	1.97473	3.404	2.87514	4.21804	4.7735	3.12299	2.8848	9.26118	5.03425	1.6577	7.42381	1.8032
CHRAC1	3.48035	3.60636	4.58627	5.08691	2.4616	3.78355	4.39999	3.79281	6.14847	5.81176	4.54225	8.25397	6.49275	5.4566	7.58353	6.7369	6.95953	5.81115	5.49161	4.39367	5.12455	4.84462	4.67653	4.96122	4.88845	4.99012	5.26781	2.97739	3.49786	3.83857	2.52205	4.6208	4.02475	4.50505	3.8532	4.88219	5.83681	5.93856	4.6994	2.92448	7.75025	4.39978
CHTF18	1.01894	1.32808	1.38496	1.00215	0.810213	1.39333	0.586909	0.841736	0.332994	0.418737	0.777533	0.383745	0.461653	0.557518	1.0289	0.500331	0.379446	0.311941	0.364309	1.04249	1.03907	0.644086	0.670869	0.9167	0.787681	0.355645	0.277405	0.615234	1.16347	1.24777	1.33188	1.03155	0.957614	0.600922	0.929501	1.11762	2.00805	0.427873	0.878408	1.49811	1.05152	1.24504
CHTOP	21.8804	19.5202	8.8475	3.14623	37.4633	20.4794	35.4721	41.4855	13.4732	30.659	41.2874	26.5877	37.7346	29.2112	24.1527	28.0711	26.4184	29.9494	27.7717	20.549	40.47	21.8188	32.8485	30.9879	23.4516	27.9178	26.1149	29.8536	27.3227	32.0497	38.3833	24.3093	28.1379	36.319	17.245	7.71525	8.41999	31.3279	19.2716	2.80292	24.6837	15.1052
CHUK	0.727806	0.824322	0.689046	0.301483	0.732505	0.918863	0.62772	0.400669	0.21736	0.054967	0.329407	0.170185	0.178002	0.251422	0.307931	0.676213	0.180268	0.138477	0.0985851	0.671579	0.579751	0.309454	0.493535	0.260153	0.659247	0.495404	0.667093	0.53577	0.538967	0.577399	0.735623	0.673635	0.592854	0.642708	0.979382	0.234381	0.712295	0.0561662	0.340804	0.0651893	0.24464	0.289567
CIAO1	2.49061	1.39273	3.70501	4.03473	2.42329	1.46116	3.69283	3.24089	4.44865	2.1053	5.26391	2.02244	0.220984	1.96763	0.649755	1.76092	2.35591	2.64341	2.04782	3.67918	2.1707	3.29042	2.00776	2.65639	3.25553	2.4314	2.21592	2.83751	2.03024	2.39802	2.4828	2.00006	1.58787	3.78101	4.93931	3.43104	3.61178	2.41546	5.11818	1.75302	0.66404	2.71925
CIAPIN1	5.65036	6.72931	5.31022	5.33243	7.12504	7.05995	6.10832	8.62956	8.86106	9.49728	7.08625	6.86133	7.31446	8.94655	7.55041	6.48462	7.52065	8.16628	7.74061	6.48537	6.42389	6.30988	7.77829	7.4487	5.22995	5.30827	5.61967	5.77144	5.93045	6.27654	7.30001	6.18148	4.75306	6.63593	7.79943	7.34058	5.23391	9.7045	7.5121	6.33931	8.19278	6.61615
CIRBP	13.5905	13.8879	15.5303	13.0877	12.4208	14.5703	7.3069	18.5731	40.9231	39.023	19.0492	47.9885	59.5647	34.8912	40.1002	32.491	27.962	40.1128	36.4358	11.8344	14.0639	14.0774	14.3981	15.3607	16.5301	7.99025	13.3127	12.9944	14.2186	15.4619	12.7258	13.7969	8.01841	7.48136	16.024	17.9979	20.4298	39.8745	19.7082	16.6516	40.9818	16.5722
CIRH1A	5.22018	5.45955	9.77929	9.32759	3.16086	5.7278	9.68267	6.15995	4.99458	7.50285	5.53827	11.5435	8.4087	6.23922	8.95098	6.28642	7.75891	7.22959	6.55871	4.7528	4.9936	5.61696	3.74055	3.29365	5.40089	5.91688	3.48475	5.19069	4.87968	5.50737	3.23848	6.66173	3.43387	5.8441	6.68351	6.75916	8.38341	7.66655	5.8396	7.515	9.3024	5.88961
CISD1	12.8378	1.05654	6.87922	8.8496	12.3938	1.10845	16.1959	8.82438	4.73104	32.6001	11.3219	27.4692	15.8117	21.5496	23.8501	35.043	28.4963	25.4483	29.2916	13.1473	13.1058	11.7029	18.5227	13.2163	12.1102	17.3951	16.0652	9.65544	7.34564	8.8855	12.6982	13.877	10.7998	16.5826	10.2005	7.23402	9.48441	33.3114	11.7136	10.9261	24.3744	7.66436
CISD2	18.941	30.669	10.4738	12.6251	20.3318	32.1759	30.5748	30.0651	30.5277	35.1097	30.9305	26.3174	44.5643	29.9934	32.178	34.4511	42.4769	25.4432	33.6906	31.8574	21.9845	20.9312	35.2481	33.0545	21.7113	36.422	36.3845	32.0248	29.3067	28.6515	20.831	25.8283	26.5346	31.3048	30.6933	8.64504	12.3511	34.6803	32.0006	13.2227	32.8854	10.9184
CIZ1	4.7158	4.73223	2.7653	3.65035	1.9436	2.48237	1.98346	2.02953	2.61139	2.29111	2.75237	1.89707	0.750851	1.58041	0.960362	1.2654	2.17488	1.92287	1.43505	3.60867	6.09972	4.89434	6.13654	3.96197	3.05251	3.82604	3.8174	3.60111	3.84385	4.46233	4.50323	7.86943	8.24246	4.06163	4.16576	3.9625	2.18111	4.13882	5.97131	2.69882	1.78197	1.2372
CKAP2	1.43011	1.11456	0.986211	0.659932	3.71095	1.16932	1.84771	1.5025	2.87444	2.656	2.64936	1.71995	2.11877	2.52068	1.23532	1.30179	2.21993	1.78438	2.51146	1.73061	3.36067	1.94662	1.67603	1.20686	2.23541	1.55118	0.936982	1.33487	1.16573	1.42156	3.80208	1.53119	1.99968	1.89183	2.0477	0.711862	0.731591	2.71395	2.43379	0.668198	1.39729	0.878989
CKAP4	19.2253	23.109	19.1427	16.6848	26.634	24.8137	23.2042	30.7137	39.6344	51.0378	28.6627	44.8341	66.4706	48.4554	38.757	53.1633	51.8187	53.8457	45.6866	22.5916	21.704	20.0585	29.673	25.742	22.3605	22.8858	23.7603	29.083	29.4417	27.2191	24.9486	23.3078	28.4488	22.8165	24.7013	19.1819	21.3787	52.1514	28.9505	21.7676	39.1586	19.8874
CKAP5	8.06285	8.86382	6.98275	8.15338	7.78953	9.29934	9.55868	10.3585	9.06265	6.71472	10.1184	8.44825	6.54623	7.02168	6.35435	8.17268	6.93791	7.05679	7.16357	8.74635	7.95009	9.50921	8.78595	7.98903	9.18716	8.75074	9.71886	9.24854	9.14669	9.02186	7.99309	8.59262	9.35789	9.86075	10.2703	8.17782	7.58402	6.6803	10.3965	7.97433	6.49404	7.83797
CKB	430.934	363.217	477.96	487.658	275.336	381.59	386.205	393.854	469.619	333.793	408.686	355.56	434.583	316.12	347.778	348.934	334.485	324.075	308.572	450.042	347.703	508.371	388.611	503.357	463.673	488.398	461.945	443.363	450.016	449.381	282.097	334.046	380.484	395.426	356.414	619.757	624.874	334.408	422.825	567.779	349.26	486.932
CKMT1A	47.6618	66.1112	83.8309	66.6441	46.7709	69.3595	43.0914	51.1861	64.2915	64.2261	55.043	55.5923	55.351	57.8452	73.0743	62.1947	54.7419	75.9432	55.0539	50.6353	54.9987	49.8544	45.6631	48.4894	41.9978	46.7431	63.8763	51.8006	44.5369	47.6653	46.4939	58.6808	56.2675	50.7865	60.3743	72.9153	76.1708	57.2543	56.891	81.9365	69.4722	67.0847
CLASP1	1.0813	1.09576	1.20593	1.28312	0.712737	0.66699	0.833578	0.534321	0.688294	0.539482	1.08398	0.565853	0.221619	0.432291	0.37166	0.596514	0.547932	0.56833	0.578555	1.57361	2.03337	1.8004	1.45058	1.58624	2.15974	0.733146	0.977311	1.13964	1.25885	1.03001	1.46048	2.02451	1.36555	1.49423	1.65752	2.16099	1.78598	1.1025	2.08728	1.49628	0.759661	1.18479
CLASP2	10.9361	17.0711	14.0916	15.2217	13.8318	17.0493	15.5493	17.5602	18.8848	8.26009	19.7386	8.71496	6.04561	8.66912	9.13555	6.15396	6.34263	7.90982	5.79044	17.9316	17.4004	16.9437	14.2716	16.3319	17.8884	13.1785	13.4908	11.6593	10.8797	13.6503	14.1714	13.9975	11.7769	16.2239	17.8319	13.6592	17.1418	8.44031	18.6204	18.6303	7.1945	14.674
CLCC1	1.63947	0.614504	1.58551	1.19135	2.49226	0.644697	0.855297	0.922415	1.33712	2.15775	1.05323	1.25532	0.549371	2.02789	1.12896	1.82812	1.96447	2.52704	2.1498	0.689179	2.33132	1.15816	1.3589	0.440241	1.0387	0.489992	0.883637	1.52045	0.987673	0.80935	2.87596	1.69339	1.0264	0.875718	0.999608	1.77103	0.765587	2.20483	0.979682	1.94142	1.15378	1.10764
CLGN	0.838688	0.57521	1.3181	0.413747	0.456045	0.603473	0.837387	0.557295	0.953929	1.01772	1.08847	1.37975	0.119234	1.06718	0.735272	0.618163	0.686009	0.920118	0.889664	0.554074	0.611957	0.234189	0.51255	0.144212	0.826868	0.740439	0.868192	0.369972	0.744533	0.508589	0.556598	1.12794	1.21001	0.857381	1.13288	0.987214	0.801666	1.03993	1.12613	0.340627	0.751436	0.196724
CLIC1	37.0107	30.736	27.7405	27.4118	32.6297	32.0643	30.8771	30.6091	45.6887	17.729	30.1547	10.9122	13.4519	17.3754	18.9629	15.7769	20.0566	19.4181	19.1737	39.8501	44.5685	59.2663	29.2102	33.5794	27.7259	37.222	39.3908	30.1497	39.1133	36.3196	33.4309	41.3966	46.3379	30.8568	38.1739	29.2952	33.8047	18.1158	31.198	35.265	19.8	41.2788
CLIC4	11.7018	10.9886	11.3571	13.2675	11.438	11.3475	12.0555	12.876	17.6797	15.6425	14.8122	10.2527	10.0097	13.1899	11.3422	12.9904	12.5238	14.2532	9.59173	9.75057	10.6712	12.5527	13.2538	10.6657	11.9022	12.1825	13.606	13.15	14.5888	15.7657	11.7189	11.5357	18.708	12.3434	12.9574	13.8991	17.2065	15.9837	15.3247	11.0269	11.5916	16.3527
CLINT1	4.71982	4.95499	5.27348	4.82025	9.9305	5.60756	7.48843	7.01126	6.42466	4.8157	5.69798	6.59287	5.07698	4.49026	7.29953	4.39928	6.58829	9.18842	7.92262	4.63402	8.22049	5.38921	7.15851	7.27607	6.30856	6.43372	4.56295	4.07189	4.23961	3.94856	11.3479	5.50223	4.26898	7.66722	6.58143	4.81512	3.51216	4.7852	5.89511	5.53354	7.46001	9.25988
CLN6	1.2676	1.56267	2.13174	2.00338	1.13458	1.63945	1.25134	0.413767	1.78486	3.11907	1.56006	2.60571	5.38791	3.58719	1.95901	1.07117	1.60673	2.25987	2.4479	2.85025	0.910481	2.52959	2.26473	2.62867	2.75429	1.46213	2.69682	1.24857	1.27258	1.76128	1.16244	1.60987	2.16036	1.28122	1.56932	1.9626	2.08971	3.18712	1.61404	2.69848	2.00208	1.49544
CLNS1A	14.3746	15.7402	18.5641	17.0675	16.301	16.5136	22.5097	20.4581	18.1849	25.9931	24.3232	25.9502	24.7226	26.5872	21.8149	24.9911	31.1875	32.0135	28.4179	18.1931	19.7109	16.9151	22.3444	18.3458	17.4177	17.77	23.6115	24.5016	17.7103	17.1024	16.4286	22.7517	16.1256	23.0471	24.5907	18.5112	18.7945	25.3971	25.1647	22.2992	22.2945	17.7339
CLPB	2.83013	1.63832	4.86077	5.26481	3.96658	1.67769	3.05343	3.10705	7.18597	8.65979	4.34648	11.1625	8.75225	9.69648	9.07817	10.7433	9.62978	8.99904	8.9154	3.64281	3.59795	3.04966	3.77639	3.78206	4.17273	3.47672	2.87897	2.33439	2.60338	2.61506	3.60146	3.70503	2.92914	3.02884	3.50378	6.12895	7.80045	8.65979	4.49685	6.31262	9.51487	6.90304
CLPP	7.5278	5.42788	6.64317	5.53738	7.11785	5.69457	7.35504	10.1089	10.7121	21.3041	7.08562	16.6632	6.42569	17.1755	13.6142	14.2042	18.6566	17.546	20.5965	8.08922	5.78739	8.07448	9.74751	9.74527	9.30065	11.028	11.539	9.76476	8.85516	9.06594	7.29263	10.9281	8.725	7.53065	11.6512	8.0333	7.94404	21.1683	7.33076	6.38502	13.9135	9.44687
CLPTM1	1.09569	2.27756	0.34915	0.661837	2.55118	2.38947	3.99714	3.24469	3.41686	8.767	5.41008	9.15871	3.22162	10.2616	6.28066	11.8179	8.24316	9.16674	10.2118	2.37626	2.25182	2.40279	3.35923	3.2323	2.37299	2.52405	3.24628	3.09031	3.73458	3.72189	2.71897	2.05677	3.63811	4.09258	4.85725	0.645611	0.173002	8.95828	5.59725	0.731236	6.41874	0.883216
CLPTM1L	0.369568	0.740034	1.21783	1.04718	0.253431	0.776395	0.502489	0.880077	0.866355	2.21028	0.636681	2.31656	2.55985	2.14	1.93555	2.95371	2.13517	1.88506	1.73707	0.49039	0.606579	0.316612	0.149213	0.242359	0.540295	0.139401	0.465393	0.692497	1.05458	0.842722	0.259655	0.381191	0.416989	0.860949	0.722056	0.599563	0.834197	2.2585	0.658708	1.36398	1.9781	0.395227
CLPX	2.40063	2.95433	2.88906	2.74564	1.35708	3.09949	1.66221	1.64646	3.82159	8.76844	1.95706	9.88364	9.02875	11.7577	8.21928	10.1497	10.8215	10.2565	11.0374	2.26042	2.33122	2.02037	2.14272	1.87339	1.54854	1.99419	2.0705	2.0034	1.89672	1.74556	1.47097	4.74242	1.65564	1.7019	1.92824	2.13268	2.73173	8.39733	1.90025	4.06079	8.73582	1.70672
CLTC	34.088	36.1221	49.8324	51.7751	42.2333	38.2041	38.537	35.9908	51.9209	24.9059	38.9823	27.8188	32.9315	26.9306	27.9597	25.8878	24.7839	26.4417	24.191	35.7467	42.7385	37.7645	36.1771	35.3156	35.5697	32.8117	32.3102	37.2325	36.0291	37.5376	43.1928	37.1146	34.1001	39.4571	37.2279	48.9885	54.8858	24.9494	40.9247	56.1951	27.9558	51.8512
CLUH	2.57882	2.03472	2.02951	1.71021	2.73199	2.1698	2.90277	2.59435	1.91928	4.56071	3.57065	4.34956	3.27725	4.63942	3.77811	4.50682	4.63188	4.56437	4.7319	2.31093	2.36322	3.29276	2.36738	1.82939	3.76398	3.18235	2.532	2.02902	2.34362	2.31892	2.75953	3.79162	4.16134	2.79667	3.35524	1.93739	1.87273	4.72477	3.6335	1.67995	3.86117	1.82686
CMAS	4.4741	6.29896	6.97151	6.78098	4.08172	6.79728	5.00479	4.67921	5.92296	3.68128	5.76474	3.67663	2.55074	3.53962	3.20069	3.77761	3.79556	2.46079	2.24541	5.38503	4.83714	4.82159	5.64078	5.00133	4.10149	5.07168	5.52794	5.37782	5.78706	4.95641	4.18195	7.55414	7.07589	5.12429	5.86856	8.0657	6.95644	3.7616	5.96418	7.98056	3.27106	6.27361
CMBL	1.70798	1.37289	1.95325	3.41366	1.2088	1.44035	1.13367	1.36857	1.19519	0.785972	1.18864	0.756865	0.721065	0.770068	0.304082	0.670965	0.755877	0.684318	0.522948	0.719999	1.18986	1.13349	1.93439	0.26735	1.29863	1.15357	1.36885	1.92046	0.992757	1.56435	1.23848	2.24241	2.22694	1.16074	1.45629	2.62529	4.62572	0.803121	1.22976	2.96307	0.310767	3.37072
CMPK1	6.57433	1.69234	10.688	13.8477	8.49344	1.77549	4.95982	6.11398	9.76047	4.40918	5.41255	6.20117	3.64978	6.73877	4.88328	4.85833	5.89499	5.9909	8.22847	6.65843	5.7091	8.03827	5.53072	4.52805	8.06617	7.9432	6.68695	5.13072	5.60773	6.41113	9.63826	8.88178	7.40509	5.07824	6.20619	13.9236	12.3093	3.88606	5.5998	8.49205	4.99063	13.3682
CNBP	60.4941	51.3764	43.1855	43.1912	37.3471	26.9499	50.0293	59.3371	184.805	27.9373	48.9828	69.7714	4.39854	23.9418	21.5213	54.4794	65.7499	66.9728	75.2464	59.7452	55.8828	67.9346	53.9579	22.4602	39.3322	47.7018	103.095	63.147	74.5173	83.8139	38.2655	95.6329	102.978	51.2231	105.91	27.3286	18.9164	28.5468	50.6782	14.8258	3.52566	43.3736
CNDP2	6.69831	11.2983	9.2634	8.73356	5.3921	11.8534	7.06345	9.00487	9.10101	4.17441	8.25939	4.91516	6.54904	5.05864	6.2629	5.10601	4.42179	5.18129	3.62172	8.06726	7.55998	6.65493	8.03172	10.4822	8.24922	7.49537	8.0038	7.67994	7.42567	9.76545	5.52451	7.79531	9.52784	8.08766	9.33683	7.01242	11.6602	4.26549	8.54513	8.16707	6.2688	7.18461
CNIH4	20.124	8.03934	4.85569	2.82871	12.2626	8.43435	27.9645	19.9335	1.88011	25.3074	23.8746	14.8198	10.1667	28.3831	25.1648	23.6876	24.0034	22.5445	24.2596	8.57581	16.459	24.9839	14.6911	12.8295	24.6187	33.9175	17.3678	13.8454	14.0603	12.3799	12.5638	32.1261	19.7689	28.6322	22.8209	34.9356	42.8895	25.8595	2.20381	31.7994	25.718	3.88877
CNN3	18.3216	12.0248	38.3031	33.5441	26.2037	12.6156	16.2096	16.899	23.5291	10.075	22.3243	13.822	8.3135	12.195	14.4837	10.6228	9.11838	12.1452	14.109	12.2789	28.1571	23.9244	18.4167	14.0043	19.5548	20.4504	17.504	19.1894	20.4613	19.1165	26.9685	24.6883	14.1022	16.5967	20.4201	34.5943	34.2367	10.2949	23.0967	35.2528	14.8021	32.7985
CNNM3	0.58704	0.576106	0.245654	0.225874	0.440287	0.556706	0.17315	0.752573	0.240278	0.347701	0.610674	0.561223	0.561557	0.551701	0.916677	0.260674	0.548468	0.725509	0.377395	0.622962	0.303588	0.700648	0.5681	0.672631	0.630559	0.412244	0.433333	0.253196	0.539484	0.743413	0.451099	0.578485	0.803122	0.177284	0.434348	0.415653	0.227672	0.355288	0.631802	0.0889933	0.936829	0.0590172
CNNM4	0.166563	0.256342	0.154327	0.204272	0.283057	0.231424	0.309395	0.370695	0.569525	0.348536	0.442911	0.139767	0.303271	0.296508	0.0943476	0.437017	0.377165	0.192823	0.271329	0.135726	0.197474	0.0923908	0.131465	0.101189	0.151775	0.23068	0.20867	0.0813524	0.16533	0.0762283	0.290008	0.251495	0.0797082	0.316782	0.577249	0.212094	0.204882	0.35614	0.458235	0.157807	0.0964217	0.0426437
CNOT1	7.64639	12.5377	19.6726	24.4469	6.69799	6.95651	6.70195	5.28535	6.58969	5.28711	7.90212	5.82959	4.66518	6.35291	4.77856	5.29611	6.89632	6.99397	7.34085	6.95209	6.00432	7.85791	5.80196	6.51588	8.04668	7.01889	7.63856	7.2473	8.10619	7.4457	6.88213	10.2217	9.58753	6.86197	8.39443	8.11648	8.1759	5.60685	9.92263	7.83464	5.06247	7.95495
CNOT10	0.771794	0.535462	0.744657	1.17398	1.15137	0.561772	0.960811	0.784875	1.26301	0.615453	0.993493	1.32976	0.79769	0.775478	0.125221	0.571781	0.49047	0.665698	0.634268	0.912758	0.846932	1.20416	0.80541	0.92311	1.20262	0.879257	1.0695	0.205749	0.569174	0.523071	1.17965	1.0648	0.796524	0.983752	1.01374	0.914683	1.33639	0.628881	1.02786	0.883883	0.127974	0.844021
CNOT3	1.64868	2.07261	0.856708	1.11166	1.88842	2.17444	2.0153	0.87139	3.60866	1.04341	2.57653	1.35617	1.09272	1.58056	1.55089	1.62613	1.38441	1.88487	1.45316	2.07645	1.41955	2.2039	2.2728	2.90787	2.22858	1.37367	2.77744	1.87337	1.72337	1.51534	1.49232	1.3117	1.4724	1.33988	1.86661	1.12135	1.2242	1.06617	2.66567	1.15088	1.58499	1.06844
CNP	4.80568	5.60116	3.89752	5.73157	4.14672	5.89994	5.98303	5.85531	9.7368	7.43162	6.45033	8.50169	5.87054	9.57249	6.79394	8.3247	6.5905	8.17967	4.74398	4.92684	5.10369	5.01898	5.29345	4.85543	4.75473	4.62752	5.07699	4.64296	5.82201	5.17916	3.67128	5.02119	4.22923	6.12588	6.07156	5.52714	4.86276	6.70654	6.85287	7.07702	7.26895	5.73677
CNPY2	15.3851	20.983	13.42	17.567	24.9563	22.014	22.2617	20.9152	39.3553	28.4739	20.8468	28.628	23.6464	26.8532	20.0912	17.3254	21.5853	21.3827	26.9069	22.5818	21.8822	23.9044	22.2989	23.4513	22.1389	14.2096	21.5225	13.1166	17.9594	14.3982	26.0584	21.6176	17.1082	22.7932	13.8307	19.0381	16.466	31.1713	22.1324	27.6833	20.5329	29.0605
CNPY3	2.11091	1.60593	0.747556	1.40698	0.929856	1.68484	2.38412	0.858064	2.4937	0.938936	0.662434	2.53454	2.91963	0.926666	1.76581	1.9131	1.2182	0.606825	2.10329	1.09701	1.48386	1.28894	1.27732	2.23974	2.64274	2.13863	0.749917	2.49267	2.49376	3.83149	0.952689	1.21393	1.3237	1.12307	1.31555	1.49274	1.00686	0.959422	0.685352	1.25476	1.80463	0.860299
CNPY4	1.54508	1.76189	2.18913	2.43287	1.4172	1.84846	2.509	1.28482	2.45216	1.81348	2.46605	1.92857	0.948224	1.09243	1.06949	1.04732	1.12232	0.850168	0.906633	1.80042	2.22782	1.56474	0.499963	2.20887	1.39306	1.23527	2.52201	1.17203	1.24626	1.38742	1.452	1.49933	1.28976	2.56891	1.55416	2.21704	1.96199	1.85304	2.55136	2.5321	1.093	1.44639
COASY	3.56885	1.73751	3.01661	5.98455	4.46704	2.08768	3.70459	1.95557	4.31023	1.83369	3.49314	1.47821	1.6548	2.48258	2.9553	1.58529	2.01616	1.9019	2.48209	5.09361	4.39417	3.42857	0.997553	3.31508	5.3008	3.93474	4.43844	2.44845	3.59914	4.50148	4.57673	3.85604	2.31939	4.03723	3.27149	7.44733	5.96828	1.7846	3.61399	4.09805	3.02027	5.7178
COBRA1	2.09013	2.75296	2.93609	3.04134	2.35103	2.45391	2.51873	2.76033	2.22379	1.47323	3.02015	1.15869	1.25229	0.848968	0.666685	0.195062	1.08365	0.960098	1.11516	2.38046	2.86544	1.76526	1.48129	2.26609	2.21531	2.2403	1.58315	1.75404	1.23786	1.6395	2.28687	2.27754	1.03652	2.65885	2.98411	3.20025	2.7952	1.50537	2.9014	3.72202	0.681342	2.99033
COG2	0.697412	1.04267	0.717562	0.963804	0.73192	1.0939	1.0891	0.756756	0.655696	0.201558	1.08474	0.2739	0.216629	0.449056	0.398305	0.294166	0.393793	0.43646	0.191867	1.05473	0.642359	0.724674	0.633561	1.24109	1.37116	1.32355	0.828051	0.712501	0.406008	0.930226	0.749893	0.558921	1.1809	1.1151	0.779395	0.733612	1.16613	0.205956	1.00083	0.625334	0.407061	0.343684
COG3	0.564595	1.12338	0.904688	0.977714	0.793571	1.0775	1.11527	1.59713	1.62196	0.367653	1.71484	0.632943	0.828668	0.611388	0.759778	0.701636	0.612133	0.456201	0.466288	0.320855	1.07867	0.81876	0.732494	0.45137	0.782708	0.984037	0.652213	0.684621	1.02664	1.28079	0.813058	0.719156	0.192479	1.1419	1.1885	0.553169	1.06945	0.375674	1.77416	0.696314	0.776481	0.416509
COG4	0.644789	0.331834	0.798494	0.624237	0.729559	0.348139	0.576138	1.09978	0.407354	0.272133	0.893454	0.45896	0.238683	0.382509	0.244444	0.126193	0.392578	0.419951	0.252386	0.351647	0.364049	0.529895	0.644096	0.640503	0.624028	0.669279	0.338077	0.343781	0.192508	0.184243	0.747474	0.773989	0.277747	0.589894	0.790604	0.459544	0.495533	0.278071	0.742568	0.3121	0.249817	0.581771
COG6	0.393572	0.948274	1.07105	0.724598	0.858865	1.06524	0.67726	1.30202	0.888147	0.657608	1.23521	0.276453	0.210718	0.680715	0.119585	0.482162	0.461017	0.348918	0.296702	0.477519	0.508303	0.765201	0.586426	0.589852	0.433182	0.853088	0.630814	0.304362	0.913379	0.199012	0.684517	0.549579	0.450147	0.673608	0.505003	1.12026	1.51425	0.658781	1.02858	0.343463	0.286753	0.800753
COIL	2.29008	4.28253	3.04927	2.53815	2.11744	4.49295	3.70629	3.70459	3.47456	5.69268	3.87918	4.52227	3.24911	5.73846	4.48108	3.96772	4.83154	5.06014	5.06582	3.84329	1.10479	2.24879	3.04033	3.75178	3.87361	3.05137	3.51149	2.90944	3.48197	3.2339	2.16943	2.98223	2.7071	3.96563	3.56319	3.38363	4.0766	5.69654	4.01339	2.38574	4.57959	2.39884
COL6A1	0.22889	0.346343	0.560715	0.67514	0.103758	0.36336	0.364364	0.246919	0.325436	0.639692	0.404199	1.0701	0.673613	0.689116	0.507758	0.933062	1.18782	0.806426	1.20237	0.142981	0.267312	0.196231	0.163236	0.374805	0.0875123	0.273165	0.269795	0.266234	0.336519	0.308652	0.0793242	0.44305	0.189228	0.436772	0.282546	0.408136	0.766292	0.653649	0.418183	0.167383	0.518921	0.230454
COLGALT1	2.56539	2.51155	4.56615	4.32106	2.94129	2.3595	2.86704	2.9075	1.93708	7.42803	3.59103	5.73534	8.8453	6.55985	6.01608	7.96552	8.36785	6.49184	7.58748	2.67635	3.62317	2.80089	3.82082	3.61179	2.37324	1.58817	3.3252	1.97	1.65628	1.72927	2.85745	3.33423	2.65049	2.93549	2.77489	5.2544	3.83174	7.59009	3.07102	3.61926	6.14834	4.66029
COMMD3-BMI1	2.5455	1.38855	1.92782	2.4464	0.978657	1.45677	3.72857	2.70838	3.45783	3.35125	3.52104	4.44512	0.304082	3.43314	1.41493	2.79393	3.15442	3.30413	3.74817	1.9157	1.43161	2.12398	0.931537	1.47757	1.78119	1.55952	2.33704	1.31876	1.73564	1.20741	1.4	3.6602	3.84519	3.8176	3.64631	2.03203	2.8427	3.34548	3.64286	1.96233	1.57939	0.695589
COMMD8	1.22056	4.29818	2.11926	4.25951	1.18698	4.50937	1.73264	3.86238	4.45396	1.30091	2.76041	3.57043	5.99091	3.67796	5.48789	3.42328	1.62014	1.84087	3.67695	1.78713	1.4468	2.5668	2.75039	2.09581	2.50593	2.04637	1.60406	3.55472	4.15957	2.73115	1.21613	3.41577	2.37706	1.77401	3.98425	2.85207	3.81873	1.3293	2.85591	2.64298	4.83823	1.56644
COMMD9	1.63682	5.54332	1.88824	2.51871	1.993	5.81569	3.40441	1.86912	12.2473	6.20266	3.90044	6.53188	7.4249	6.12815	7.13857	7.13353	1.5469	5.18728	4.44775	1.38591	3.1569	4.03824	1.41989	3.91557	3.36516	2.34793	3.39772	1.21024	3.97587	1.82062	2.04194	3.20677	0.830216	3.4857	4.43524	0.469618	5.48528	6.33799	4.03539	2.21068	7.2955	1.18145
COMT	29.2275	38.8899	39.5129	42.9939	25.8431	40.8007	30.3049	26.1375	48.2743	26.0873	30.0977	17.346	30.1118	23.867	33.6002	23.5323	28.8688	25.6154	25.9467	39.6011	32.7884	31.456	16.8214	34.6687	35.8441	27.1675	37.7294	32.5524	37.1691	38.6592	26.4777	36.4635	27.0817	31.0285	33.585	41.0511	55.2208	26.6565	31.139	40.4622	29.5314	37.7911
COPA	10.0934	13.9273	12.9681	13.216	10.0917	14.6116	11.4032	11.8319	10.0167	7.92591	13.2284	11.1115	8.92064	8.72262	10.1506	9.91606	10.0331	8.01516	10.5267	8.77181	12.6228	8.55984	10.9983	10.5121	9.55996	11.6853	11.4384	10.0014	11.4585	11.2737	10.308	12.648	10.6421	11.6514	12.5519	11.5412	15.7122	8.05694	13.2619	14.4795	10.2616	11.361
COPB1	11.9752	12.0953	14.3696	13.1538	10.0797	12.4052	13.8546	14.8622	15.463	14.4668	13.8675	12.1521	11.9605	12.6819	12.7688	12.9047	13.2696	13.1552	13.0688	10.4694	12.167	12.1825	12.179	12.3732	13.0881	14.0734	13.4472	11.5535	12.2686	13.1088	10.4831	16.4579	10.8544	14.1854	14.5555	14.4815	14.3557	14.7023	13.9152	13.8711	13.0495	13.6437
COPB2	6.97951	6.76635	9.82425	12.4391	6.68913	7.09882	7.45536	7.35292	8.73456	8.86269	9.07058	10.0603	7.39725	9.10285	10.2467	10.4287	9.66293	10.5064	8.71389	7.95855	6.72508	9.28213	8.46858	8.02993	7.9425	7.3942	7.96086	5.85666	6.87497	7.55672	6.85339	9.31344	9.00519	7.63337	9.95331	10.6566	10.345	8.44512	9.38439	11.8558	10.2141	8.6851
COPE	7.80831	6.27303	14.1998	14.122	7.08067	6.58125	8.40224	9.50837	12.7337	8.84542	11.1821	7.95972	5.47864	10.082	8.17312	10.309	9.85944	9.32998	7.88052	8.675	7.74795	11.2728	9.48281	9.60783	10.0086	10.3849	8.84485	9.10525	9.41738	10.3286	7.25454	8.27862	7.28879	8.60285	10.7852	15.4016	15.3695	9.10826	11.569	13.0236	8.3528	12.1604
COPG1	6.68832	9.02001	8.48189	7.66294	9.61191	9.39162	8.82608	7.0143	10.5171	7.74604	8.16447	7.20336	8.4332	8.918	8.29395	6.70674	7.22896	5.69147	6.28802	7.2789	8.34981	5.54405	5.51188	7.68524	7.1567	5.92341	6.05046	7.60593	8.30842	7.37234	9.84793	7.79046	6.87283	8.89824	9.61231	8.03567	10.7324	8.2922	8.36445	6.33598	8.47629	6.68959
COPG2	2.98646	2.50881	3.91586	2.79966	2.42112	2.774	3.40458	3.09768	3.23918	2.32187	3.53053	2.91247	1.31925	2.31441	2.50935	2.32259	2.25087	2.3624	2.95837	2.38438	2.85643	3.56572	2.77596	2.56634	3.02868	2.94916	2.77216	3.69687	2.88122	2.50979	2.36406	2.77679	1.86581	3.53905	3.83087	3.02252	3.51624	2.22681	3.66047	2.35159	2.7	1.47701
COPS2	5.69691	7.06345	8.15296	10.7423	7.92596	7.41051	9.15672	7.72485	7.09595	4.42214	10.5272	6.65385	4.2248	6.13154	7.62574	6.02888	6.68031	7.75437	5.61569	7.20125	6.12108	10.4074	7.5681	9.47059	8.95657	9.10158	9.90685	8.14948	6.22377	6.1996	8.12059	9.08583	7.37673	9.37535	10.8158	8.9418	8.17436	4.51862	10.8914	8.82526	7.79339	7.64403
COPS3	8.85127	8.95668	10.4372	10.6071	10.3788	10.2814	10.0352	12.5547	10.7382	3.41945	12.4482	8.16092	8.58288	6.05031	9.0683	8.20341	7.71661	6.98728	4.59786	12.6611	6.47321	6.29387	7.55161	11.6136	5.39819	10.799	10.148	11.3478	13.001	13.2176	11.086	12.9419	9.43752	10.2748	13.1692	10.6611	14.0262	3.66389	13.1244	10.5565	9.45144	11.8145
COPS4	7.14594	5.61001	15.5948	14.2972	9.65014	5.88565	6.47778	7.03909	7.19471	6.00789	6.27474	6.87831	4.72084	6.75259	6.10873	5.55236	5.43694	7.42789	5.47292	7.78367	8.48775	5.20785	6.5601	6.85411	7.10376	7.13199	8.25715	6.14437	6.57648	6.18524	9.90938	8.09119	6.73743	6.63244	6.67961	13.8599	11.0717	5.68382	6.68528	14.1603	5.83412	12.4414
COPS5	6.09259	3.99105	7.98967	7.55052	9.96949	4.18715	5.00123	4.61469	4.16716	5.25344	4.73119	3.42583	3.77114	4.74244	3.69697	4.33159	4.19056	4.81318	4.62446	5.21924	5.38908	5.02648	5.08528	6.67499	4.55481	6.14902	5.48311	6.27115	5.58648	4.45839	10.2143	5.02396	4.49743	5.12064	5.84349	7.80079	10.7375	5.5312	4.89488	8.04128	3.77825	10.3592
COPS6	11.0471	11.1252	12.7847	12.9678	9.02194	11.6719	11.1665	11.7046	8.92962	7.91152	13.7701	8.09364	9.43489	5.61395	7.77871	7.15092	7.40985	5.22146	8.28477	13.5526	11.8774	11.1095	9.03871	9.75904	11.5049	10.4589	10.5906	10.8447	10.7768	9.54487	9.82259	12.5203	12.1974	11.4331	13.5168	17.0797	16.8583	8.08414	14.2465	14.2437	7.15868	14.8957
COPS7A	2.02299	1.19937	1.26391	1.53977	3.00389	1.2583	1.5567	1.02312	1.21698	1.05391	1.59525	2.25922	3.81816	2.41135	2.12491	3.17948	3.75524	1.59742	2.91692	5.09878	1.5587	5.194	2.66271	5.4923	4.1762	2.87962	3.92759	3.96485	2.52255	4.45308	3.54017	4.7153	2.8342	1.59387	1.57607	3.2645	1.91989	1.07691	1.65044	1.3226	1.92734	1.59525
COPS7B	5.76523	6.24052	9.09953	21.5162	4.16284	6.54715	51.3746	4.54755	5.8402	4.11714	4.40874	21.082	13.4297	20.4172	8.47926	18.4971	6.20743	6.27459	6.78029	47.1097	5.66353	3.83502	76.0294	5.1541	3.88894	4.03617	57.2704	3.40896	5.56126	2.17804	4.59616	7.40462	5.79669	52.6012	47.8772	6.1072	9.07612	4.20697	5.42907	24.4535	8.66567	5.14239
COPS8	20.2034	20.7763	17.1726	16.7302	11.8923	21.7971	19.1433	15.9704	21.7401	14.7388	21.3511	12.1804	14.3195	13.927	15.5572	10.0171	16.7744	14.5886	14.3309	20.619	12.4911	33.3681	23.5728	25.51	29.1815	29.7739	19.4373	25.1924	22.9159	21.4931	12.1843	18.3985	27.5801	19.6004	27.5867	10.116	21.8437	15.0603	22.0898	16.6827	15.8992	14.4287
COPZ1	18.2794	21.3594	31.2292	14.2557	24.1632	22.4089	26.9248	17.6943	20.9109	28.3386	29.6453	31.81	26.6018	33.9212	47.3383	40.4615	38.5152	30.8695	23.2292	22.3132	29.8555	28.3743	27.5123	9.3768	26.5472	22.4357	22.4361	17.8423	29.2312	31.2528	24.7565	16.5648	19.0853	27.5676	23.8554	14.6999	33.8929	28.9569	30.671	22.0467	48.379	7.152
COQ3	1.29936	1.49981	1.37419	1.03466	0.426449	1.5735	2.09505	0.356028	1.82135	3.80589	1.82785	3.67248	1.08907	3.27279	3.67373	3.96877	4.9062	4.01989	4.48911	1.38716	0.933825	1.00201	1.68533	1.35704	1.24306	1.51303	1.91265	1.16184	1.84062	1.86582	0.43692	1.49785	2.38917	2.14507	2.69167	1.0602	1.28349	3.88893	1.89108	0.891434	3.75449	0.325717
COQ6	0.915619	4.13756	1.40383	1.97195	2.68387	4.34086	0.594332	1.22696	1.02828	17.6002	0.881874	21.4975	74.2589	13.3282	17.9004	13.7659	20.8293	1.06843	16.0776	0.752779	2.99112	1.77927	0.331194	0.461771	1.56232	1.24541	0.476355	3.10322	2.0354	1.64048	2.81498	4.60269	3.37287	0.776182	6.43395	2.15698	2.76303	18.1356	0.579469	2.95584	18.4475	0.998524
COQ9	3.63785	4.18202	2.45216	4.81141	4.26306	4.3875	5.20569	5.52336	8.34198	13.4293	7.09321	14.8167	4.66703	15.1098	10.5707	12.4681	14.7927	14.1805	16.8461	3.24534	3.41373	4.02639	3.37521	2.99969	4.37819	5.52552	7.99778	5.74677	8.57395	4.31731	4.36775	6.24056	5.21174	5.32998	8.04983	6.95208	6.47211	13.7223	7.33861	4.05879	10.8031	2.80181
CORO1B	2.6095	1.79165	4.78286	4.228	3.48591	1.87968	3.79519	3.62818	2.90137	2.09185	3.99827	2.02061	2.56895	2.31877	1.57918	2.58329	1.97654	3.20517	2.08518	2.00566	1.76834	2.3876	3.01677	3.54198	3.49217	3.54129	3.02457	2.46155	2.13688	1.32382	3.57151	3.41617	3.3972	3.8858	4.54827	4.07599	6.42803	2.13749	4.1366	4.94053	1.6139	6.00063
CORO1C	7.00833	8.95273	14.6364	15.1318	10.2394	9.39262	5.39362	6.20127	5.67387	8.84326	5.09123	7.17067	10.2604	9.80544	7.86741	7.22143	7.72253	7.03192	4.28475	10.2471	4.76331	5.05168	8.82466	9.77949	4.44028	9.86311	9.32047	7.65831	6.89919	7.11773	10.4908	4.34787	5.55661	5.5224	6.56194	13.8263	17.125	9.03621	5.28793	14.1781	8.29733	10.6474
CORO7-PAM16	1.96938	4.17234	3.32443	2.78813	1.78235	4.48304	4.39999	2.72626	4.29823	4.11427	4.10065	3.93516	1.75535	5.40911	4.74896	2.10628	2.33563	5.29154	5.70853	5.40237	1.30886	5.72007	2.97857	4.09607	4.8909	1.76717	2.68269	3.03641	3.90776	3.90941	1.82612	5.19308	3.12911	4.50505	3.60038	3.02261	2.9075	4.20403	4.24252	2.57948	4.85336	2.55214
COX2	40.8577	31.9788	70.5375	78.4753	38.0668	33.5501	40.2623	51.7858	54.9832	65.6895	53.294	49.1931	66.7851	69.5405	75.1741	52.9094	70.3766	55.4608	75.2392	31.074	33.9996	38.3068	29.5619	30.4944	40.1621	44.0687	38.3812	25.6441	33.072	40.2924	42.4985	43.4529	31.4952	41.2236	38.7512	76.0923	85.3934	67.1228	55.1378	83.9729	76.8267	75.462
COX20	1.86372	2.76168	2.22321	2.42304	1.12634	2.89738	2.64247	2.76151	2.20535	7.71798	5.1161	4.19124	5.97502	8.56032	3.28282	7.90115	8.09716	7.5331	6.22634	2.25776	2.36039	1.9855	4.79433	1.15782	3.90324	4.48922	2.47417	4.23359	1.00721	3.40607	1.15399	1.96711	3.03215	2.70557	2.98674	1.21636	1.51877	7.88637	5.2931	0.74714	3.35499	1.76914
COX4I1	14.9793	8.73953	38.299	31.6598	74.1785	9.16894	21.115	17.6057	8.62764	28.9969	15.5475	78.8113	8.43105	50.8922	62.4854	55.8495	64.3101	72.1811	72.5804	9.25504	73.6969	7.62365	9.3958	10.9736	9.72472	13.9231	13.7188	13.7721	11.2226	15.5013	76.0001	25.0753	17.6862	21.6191	17.1291	35.0794	17.6627	29.6296	16.0854	73.4962	63.859	56.5538
COX5A	15.2048	14.0719	23.7158	25.4023	36.9221	14.7633	23.3233	24.7965	16.8121	44.0818	23.4854	43.8747	21.4642	42.7204	45.1431	34.0015	49.706	38.8821	49.5112	14.0239	44.5685	11.7575	4.03134	14.8427	17.3391	18.8962	14.7126	16.1652	14.6021	15.1699	37.8288	20.4232	15.8265	23.8802	23.9344	35.4825	23.3909	45.1899	24.298	26.184	46.0066	40.9057
COX5B	32.0934	38.4011	46.5868	53.9621	45.1584	40.2879	37.6853	43.6555	62.4984	87.2167	40.4743	97.6104	111.916	95.5972	75.8594	93.0555	74.093	82.0837	98.0874	41.8479	46.6801	38.3101	51.1406	48.1552	34.1437	46.0138	47.5395	43.0666	36.6825	37.2799	46.2673	27.6056	30.5339	38.585	37.6693	71.3473	55.8556	89.7078	41.8746	67.0166	77.145	61.6296
COX6B1	16.277	9.82537	27.1241	44.0667	11.956	10.3081	18.9099	15.2898	54.9897	35.6688	20.1008	22.2181	16.633	26.0461	18.3664	30.3595	22.9869	28.9356	33.1081	19.8663	10.3887	13.631	20.6918	18.7764	21.7177	19.5733	20.2115	16.1084	15.239	16.8932	12.2496	13.9334	21.1978	19.3614	19.1949	40.8199	53.9414	36.447	20.7962	38.1122	18.7702	33.7189
CPD	1.81295	1.89024	0.85943	0.609267	1.51405	1.64296	1.49778	1.24282	1.5907	2.37928	1.51185	2.41332	2.04394	2.65639	2.38928	2.38445	2.91561	2.84299	2.50126	1.50438	1.49419	1.85853	1.30628	1.39939	1.88077	1.70793	1.58002	1.41718	1.52529	1.20112	1.59163	1.33921	1.98081	1.32295	1.61736	0.830022	0.695159	2.38562	1.20645	0.794975	2.44181	2.09199
CPNE1	9.33947	9.7686	20.4673	22.7088	8.4672	10.2486	9.22155	12.5707	18.6868	3.03755	9.89127	6.15627	1.72936	5.69473	4.72944	5.44417	5.783	5.46619	4.69462	9.72931	10.6722	8.91573	8.42886	10.3169	8.66377	10.7656	9.9417	7.38407	8.88157	8.83867	8.67512	9.12255	7.19551	9.44173	6.38907	22.7474	21.026	3.10382	9.55853	16.2434	4.83341	15.3437
CPNE3	14.7676	20.8181	22.8183	24.0559	18.3077	21.841	15.5062	19.9934	15.2965	11.4759	19.8332	12.8399	10.3379	12.4572	8.18913	12.3257	10.2501	10.5568	7.78164	17.453	20.6811	16.525	14.5459	17.2754	15.2226	19.659	21.0215	13.7782	19.246	16.7183	18.2181	19.6661	16.3665	15.8764	19.5626	23.1533	22.8454	11.7263	20.5193	22.6039	8.36916	21.5675
CPOX	15.1999	15.5048	16.2698	16.9907	13.9193	16.3556	15.896	12.849	10.7407	21.4236	17.092	18.3834	8.96517	19.8949	12.874	23.876	18.962	16.337	18.2224	15.8035	13.7277	12.6672	14.5503	12.1575	16.8908	20.86	12.5004	18.1372	17.8565	18.9862	14.6459	15.5772	18.3436	16.4963	17.4767	18.2682	20.9434	21.891	17.8562	19.4365	13.5347	15.2796
CPSF1	1.6919	1.78866	3.24568	3.35948	2.17276	1.87654	1.63288	1.70508	2.12936	1.68332	2.5783	1.52335	0.641857	1.17103	1.35616	1.34085	1.41345	1.83947	1.71219	1.87037	2.03702	1.07701	1.8553	1.52734	2.07812	1.94475	1.32654	1.59165	1.63194	1.45802	2.16828	2.33524	1.85905	1.67186	2.42567	3.1654	4.189	1.72005	2.62658	3.52038	1.41074	2.37734
CPSF2	5.60772	3.65966	7.06321	6.4746	2.97338	3.75597	4.84125	5.55878	5.32782	2.735	5.14843	2.88172	2.66598	3.48011	3.47943	2.63803	4.38209	3.73901	3.99219	4.42277	2.89086	4.44185	3.43394	4.25475	4.52956	3.84271	4.03873	2.89046	3.25458	3.90488	3.76122	4.0687	4.69206	5.20901	4.93805	4.32761	5.80662	2.87128	5.32655	4.36019	3.6979	4.26211
CPSF3	5.42375	4.90229	5.92732	6.12095	4.53113	5.09338	5.40789	6.73893	5.57536	5.05435	7.04765	5.70265	4.23076	5.14761	3.11572	5.06016	5.54458	4.20512	5.47529	4.51007	5.82162	6.47189	4.81839	4.21994	6.56169	6.11425	5.67241	4.96314	5.27528	4.05797	4.6424	6.23284	5.44482	5.53701	6.18491	7.29772	5.88144	5.64441	7.29148	7.52423	3.32597	4.66138
CPSF3L	0.328765	0.237866	0.475825	0.71991	0.285096	0.222823	0.292709	0.346667	0.386893	0.281379	0.133037	0.157862	0.28976	0.360222	0.354785	0.13178	0.173394	0.152231	0.184639	0.408854	0.303538	0.439746	0.0874506	0.323623	0.336271	0.313451	0.268778	0.216889	0.36893	0.214006	0.292097	0.5942	0.215158	0.299697	0.313781	0.48315	0.539139	0.287518	0.13764	0.632174	0.362584	0.202713
CPSF4	2.55579	3.33687	6.01252	5.30892	3.40315	3.06313	6.09697	6.43776	3.00527	2.39806	2.64284	2.52643	0.65247	3.10898	1.45912	2.38315	1.91128	2.88928	2.37374	2.02147	4.44703	4.86097	3.94468	4.43977	5.72462	2.84851	3.57535	5.08745	4.74404	4.77499	3.48672	5.467	4.38113	6.24254	6.5276	3.15047	5.59019	2.6222	2.73427	6.21786	1.49119	2.19316
CPSF6	13.5238	20.9687	18.3795	16.7325	11.7289	21.9989	14.1577	19.8947	30.3098	12.168	22.7622	11.1512	10.7927	12.6594	8.25525	11.6368	12.4575	12.1656	8.94314	16.7898	16.9958	13.1528	18.59	15.6808	14.9083	16.5977	23.4476	20.5483	19.0828	16.944	12.0169	11.6534	14.0606	10.761	13.4578	21.6954	23.4206	12.4335	23.5497	21.415	8.21317	13.6825
CPSF7	5.16813	8.58501	10.1964	7.83677	2.48386	9.00683	6.39965	8.8151	3.05342	7.49997	7.52665	14.657	5.82965	6.43143	13.6723	9.92981	11.969	8.24153	6.87689	5.66022	5.71022	3.90142	3.25977	5.39556	5.72732	5.02619	5.48819	5.63214	5.40278	5.34149	1.77996	4.97933	6.50245	6.55245	7.92742	7.98289	9.25949	7.66361	7.935	10.2629	13.9729	8.57128
CPT1A	1.21213	1.98584	1.61077	1.3445	1.40258	2.02712	1.34413	0.942487	1.25836	1.97551	1.81696	1.16761	0.922445	1.69433	1.31306	1.82359	1.59631	1.245	1.27759	0.663171	1.83619	1.0586	0.730878	0.322955	1.24475	1.74814	1.21844	1.5231	1.23127	1.09262	1.43702	1.69784	1.71557	1.24736	1.49885	2.53592	3.45386	2.01861	1.87982	2.33391	1.34193	1.52398
CPT2	2.24332	2.43555	3.61088	3.20279	2.38379	2.55522	2.42367	2.80191	2.83371	5.64362	2.75072	5.84839	4.46404	6.39657	4.75521	5.83125	5.8665	5.20922	5.82153	2.22824	2.18944	2.82625	2.56746	2.4521	2.64042	2.52191	1.90926	1.87924	1.91354	1.219	2.44232	1.89012	2.26159	2.48153	2.41683	3.46353	4.64302	5.92511	2.99201	3.68476	4.84776	3.06296
CPVL	3.73744	3.55533	4.49498	5.09459	3.86658	3.73002	4.6188	4.35897	5.99324	4.63849	3.76409	5.07536	4.59302	4.12115	4.30948	2.9491	3.76597	3.9551	3.13059	5.61643	3.30487	4.66108	5.58912	3.55044	4.70024	6.49358	5.23823	4.27478	4.24656	5.11068	3.96152	3.57599	3.82253	4.72908	4.71071	5.45352	4.50263	4.73969	3.89431	5.21457	4.40422	3.90214
CRABP2	6.4916	6.54013	6.76504	6.92299	4.604	5.82196	9.58785	2.63787	10.7309	53.7596	9.53692	36.9882	33.1964	40.1317	33.6221	48.0722	48.1118	52.9536	40.3845	7.1029	4.04649	4.43417	9.14052	4.81001	7.08212	8.28174	9.08859	9.56131	8.43314	10.0673	3.67566	3.1563	10.5204	9.81677	9.3638	6.14115	4.8761	54.9326	9.86687	8.19843	34.3612	6.15067
CRAT	0.47112	0.497997	1.6749	1.55344	0.469478	0.522466	0.81348	1.07498	0.653835	1.15363	1.01178	0.92065	0.983027	1.42712	0.749987	1.23096	1.30896	1.04369	1.22114	0.36852	0.350286	0.951421	0.195324	0.262454	0.819357	0.833089	0.396169	0.392822	0.591337	0.507369	0.271721	0.448404	0.281604	0.545976	0.603427	1.02271	1.17979	1.34106	0.803058	0.548883	0.766474	1.21433
CREB1	6.52865	5.22448	5.53077	4.20763	3.50465	4.38487	8.30985	9.19294	6.9603	7.12138	8.55235	7.88742	3.91601	4.61537	9.18333	2.95525	7.68599	10.852	11.2568	5.19042	5.50149	8.71484	6.91517	6.99804	5.17958	5.80159	8.33419	5.65776	5.43416	5.62051	3.59071	7.96779	6.74217	8.50826	8.60806	5.62943	4.59608	4.39062	8.84824	5.82682	9.38522	3.86456
CRK	13.2784	12.7394	18.4416	21.1072	5.53161	7.62731	6.97917	8.23983	10.4134	7.26082	10.276	5.73377	3.84979	5.90265	5.35203	4.72426	6.2666	5.41277	4.40537	9.4835	7.17569	9.10593	8.02351	5.89392	8.68167	8.2063	7.67669	8.58451	9.51012	9.3568	5.20553	7.34611	8.94977	7.14581	9.81843	8.48083	14.1943	7.41923	10.6315	10.3387	5.46969	6.54199
CRKL	16.8269	16.1059	18.1843	15.4599	11.1254	18.9535	18.3742	18.7966	17.7564	10.9773	21.5372	8.5784	10.6111	11.5878	10.3567	8.96836	12.0124	11.4776	9.70921	17.1997	18.8511	19.6798	18.5934	15.9873	19.426	23.141	20.3999	21.1708	20.6479	19.4795	12.3249	16.9725	15.5334	18.8129	20.1915	15.1504	20.4133	11.2168	22.2823	22.3982	10.5844	14.7629
CRNKL1	1.59595	1.1602	1.29923	1.21402	1.06921	1.40412	0.815587	0.93574	0.918018	1.18788	0.861879	1.32863	0.300423	1.46394	0.281045	1.49505	1.11237	1.16453	0.859805	0.73988	0.85873	0.806496	1.12028	0.78801	1.163	0.759942	0.989254	1.20917	1.14575	1.17939	1.21928	1.88468	1.27659	0.835061	1.30027	0.939982	1.16536	1.27592	0.891697	1.20538	0.287223	1.44268
CRTAP	3.79556	4.01842	5.27443	6.36739	1.4735	4.21586	4.16384	0.9575	1.49415	1.58777	3.27288	6.54382	9.87828	6.17692	8.64988	2.42342	2.52141	5.73024	2.21009	2.84158	2.62846	2.43783	3.58354	1.80515	3.284	4.79379	1.22348	4.65758	3.59795	3.66935	1.43525	4.09552	1.04847	4.12759	1.9276	5.55016	6.60799	1.62242	3.38611	3.94724	8.84004	4.9984
CRTC2	1.22242	2.33791	1.09075	0.304495	0.302196	2.45278	1.70144	2.26585	2.57352	0.535402	2.52287	0.598991	0.519205	0.557262	0.466288	0.347284	0.761946	0.696815	0.32767	2.28323	1.4314	1.39664	1.23469	0.372366	0.79711	2.15845	2.2681	1.62109	1.7987	0.505303	0.309616	0.675871	2.17935	1.74206	1.58165	0.681494	0.583428	0.547084	2.61015	0.927569	0.476539	0.941254
CRYZ	8.66299	6.28797	16.0858	13.03	7.48367	6.59692	9.64782	9.39282	7.72219	5.56289	9.22434	6.42688	6.19158	5.8369	6.52836	4.98019	5.45248	4.40764	4.51416	10.069	4.60947	6.3556	9.85252	9.20692	8.38771	9.19465	9.77198	12.0557	9.43466	11.3349	7.58895	9.1084	7.77785	9.87818	9.99988	10.5219	12.2266	5.47414	9.54347	11.7202	6.53696	13.3302
CS	30.7271	29.6449	63.0181	56.6948	41.5489	30.8645	29.309	28.4635	29.1394	47.5044	30.9646	74.3159	68.9442	63.2931	53.1574	52.4056	53.098	60.3241	49.6352	30.2737	57.7858	31.149	29.8833	27.2855	28.8736	35.1515	28.7388	27.9121	22.5525	23.5887	42.7673	38.9711	26.5773	30.0087	32.717	75.4762	51.4641	48.6754	32.0359	62.0863	44.8737	67.8832
CSDA	162.619	255.816	74.3249	76.1084	176.271	192.424	200.947	213.698	234.042	300.556	236.044	268.365	76.7345	298.043	250.128	293.46	209.006	295.708	205.433	175.33	144.1	152.79	163.815	230.239	172.546	112.989	250.193	211.199	185.055	171.043	180.599	195.846	263.435	205.745	247.75	114.667	92.4792	308.364	243.202	128.199	255.515	70.3285
CSDE1	6.82769	5.76357	5.77895	6.64466	7.44447	5.42463	8.33821	6.4612	6.65278	12.1292	8.55172	12.3093	9.93044	13.4018	8.94221	10.8581	12.6114	11.0331	10.4369	6.66598	7.58753	6.67295	7.04223	5.19225	7.2644	5.08658	6.40063	6.70558	6.82869	6.99691	7.66806	6.64768	6.01386	7.48128	7.66564	6.41825	7.28318	11.8667	8.16085	8.57357	9.13879	8.35106
CSE1L	30.5076	30.9989	33.3709	83.8776	83.69	32.5333	33.9291	117.518	33.8119	26.0945	36.7328	97.5223	41.0807	25.4736	25.645	24.2003	28.4056	26.7357	24.3044	126.968	32.1817	127.839	30.649	157.885	29.7818	31.0732	154.101	141.559	145.26	34.0115	85.7451	32.4339	102.357	32.917	107.842	28.7892	88.4095	26.2727	37.967	104.409	26.2088	26.8122
CSK	5.94008	4.07948	6.31956	7.85752	5.45762	4.27993	5.90653	5.89833	6.01952	2.98078	5.63376	2.56975	3.08155	2.70936	2.0941	1.93235	2.73299	2.02011	2.28922	6.27859	6.08432	4.92604	6.00662	6.5403	6.39293	5.96733	5.78223	5.36017	4.63978	5.56522	5.59163	5.46304	5.47496	6.04755	6.05228	7.49756	9.42446	3.04582	5.82867	6.82667	2.22307	6.51046
CSNK1A1	2.96744	2.49184	3.6601	2.98809	1.81173	2.61427	15.2712	2.17712	1.6888	1.61907	4.52896	1.05935	1.70022	1.20056	0.969693	1.02872	1.04805	1.22338	0.874979	2.07799	1.64256	1.463	2.66305	2.93088	2.6676	4.35851	2.52785	3.40232	2.24631	2.40747	1.85622	2.24142	1.23719	15.6358	2.07888	3.68576	3.07654	1.6544	4.50687	2.45258	0.991011	2.82394
CSNK1E	1.94233	1.20654	4.24307	3.95089	1.73332	2.23212	1.93913	2.82957	1.00437	0.960449	1.79368	1.06331	0.991371	1.60874	1.36668	1.31376	1.01017	1.35786	0.980385	2.02846	1.55617	2.48154	2.44176	0.711346	3.44773	1.59387	1.33643	1.77992	1.49878	2.29826	1.77588	2.69565	2.9168	1.98543	2.58611	3.17195	2.58384	0.873919	1.62052	2.87732	1.39673	2.43326
CSNK2A1	20.1662	18.1662	27.8476	31.2357	15.1165	19.0588	17.7291	23.7161	15.2573	8.49935	22.2465	10.0421	12.7459	12.083	10.195	7.42091	7.89276	10.3107	10.1799	28.0269	18.1341	24.9372	18.2837	25.1993	29.376	22.3614	24.9564	18.7806	15.6318	15.6723	15.4877	24.0203	24.2892	18.4288	22.2562	31.6458	26.9426	8.68479	23.0161	19.8669	10.6188	38.9699
CSNK2A2	4.80029	3.99236	11.6967	11.8028	3.35862	4.18853	5.98068	8.79992	6.9843	1.26853	8.03476	2.99244	1.70734	3.00039	2.66779	1.0005	2.9426	2.36986	2.53259	5.40545	3.52524	4.80741	7.06949	5.74574	6.73534	6.95213	6.20096	5.68148	6.1632	4.63489	3.44109	6.64679	4.81809	6.18803	6.84658	11.8315	8.29205	1.05588	7.45776	7.98768	2.95953	10.5507
CSNK2B	31.078	27.8343	32.687	18.6068	30.2038	29.2019	31.4743	42.134	21.9221	17.6743	38.0983	20.5419	8.92494	17.7488	22.566	19.0607	18.8263	18.3341	21.3789	22.898	29.82	36.962	28.0457	18.104	40.8114	26.2237	25.8757	28.7225	32.6391	33.1949	30.9455	33.746	43.0245	36.967	37.072	27.9711	38.6678	18.0599	39.4164	33.8859	23.0621	32.5482
CSRP2	24.5307	26.8317	31.948	20.4495	23.1272	28.15	27.5561	11.3335	9.89269	11.9169	14.8787	13.8698	16.7787	19.3343	16.8423	16.9817	30.5253	17.3617	20.5842	12.4177	11.2454	13.2945	17.0755	12.592	16.6551	10.1815	10.7159	37.2648	36.3886	31.2135	23.6951	30.3161	36.2778	28.214	26.5364	17.9278	24.5469	12.1769	15.3934	28.9845	17.2126	11.0801
CSTB	82.3879	81.8155	83.0677	79.505	48.3346	85.8355	119.623	103.231	98.6576	88.4686	130.418	77.2206	79.8286	79.5316	53.5412	73.0949	75.6895	72.8889	79.0728	76.1495	65.1686	77.4428	72.519	109.679	97.434	87.5074	101.647	97.101	76.6359	90.3209	49.5215	86.9633	70.7684	122.479	81.7214	74.2239	105.239	90.3989	134.93	107.788	54.7182	88.739
CSTF1	8.26525	6.16763	12.6764	12.3891	6.62953	6.95187	8.50111	8.68691	8.15386	5.00097	10.4025	4.55829	4.13225	5.2471	3.61737	2.97247	5.95197	4.80789	4.84212	6.27481	8.20044	6.86632	10.0065	5.07191	7.31953	6.24575	4.64827	7.84316	7.72972	7.22536	6.79233	8.6517	6.83071	8.70408	6.97816	11.7077	14.2917	5.11008	9.7163	9.15135	3.69689	8.07952
CSTF2	14.3266	14.7591	14.3613	14.5401	15.5101	15.4843	14.8587	13.1729	14.1082	9.45699	14.4269	10.6199	7.56066	11.2332	12.3291	12.4317	11.8206	13.1055	13.0631	13.0668	17.8951	13.5213	15.6358	13.5385	16.2558	11.3501	11.7297	17.2733	18.0853	14.4863	15.891	17.0358	15.6972	15.2135	16.1146	15.9776	12.6905	9.66333	14.926	14.6663	8.59463	15.3085
CSTF3	5.67908	7.20351	7.22945	8.7351	3.65885	7.98236	7.23866	9.7403	8.08742	4.73238	9.20662	3.26858	8.83984	6.88011	6.34042	5.06695	5.50268	5.14233	4.98473	4.62381	5.17316	6.12051	4.30614	2.96627	6.95265	6.01151	3.71964	6.55223	6.27004	5.78481	3.81767	7.71337	4.77917	7.41149	8.43772	4.9469	9.04747	4.83563	9.52514	7.61309	6.22532	4.33835
CTAGE5	0.486606	0.508143	0.682243	0.72761	0.927682	0.597191	0.523081	0.560457	0.780038	1.13975	0.707296	1.99301	0.788087	2.00527	1.34398	1.87259	1.56711	2.55822	1.70615	0.448405	1.45642	0.47707	0.603389	0.536056	0.594284	0.295125	0.544939	0.371187	0.576025	0.183566	1.04808	0.517813	0.622831	0.478351	0.412763	0.470273	0.293648	1.16461	0.649916	0.511692	1.37353	0.575457
CTBP1	9.24999	9.55911	12.1114	13.6878	5.81512	6.80104	7.35512	8.51233	9.07898	2.76177	8.02906	3.2677	2.7226	2.90496	2.73501	3.20511	3.07455	2.10734	2.42326	11.8935	11.6536	11.3262	11.8647	11.2378	12.1272	13.2881	14.6363	11.2407	10.4417	10.8099	8.85331	11.0151	10.0805	12.3376	13.0596	14.9493	15.3486	4.66919	13.3666	11.9226	4.7645	15.1658
CTBP2	6.63117	7.61593	8.87886	9.64035	7.78428	11.2178	10.9218	11.8547	12.8643	6.18309	10.96	6.5564	6.38447	6.17775	7.17651	6.34909	6.13206	5.49769	5.79828	5.28136	4.10746	5.51418	6.00393	6.75502	7.51238	6.34326	6.94274	6.93939	7.34325	7.4119	5.08034	5.71806	5.09876	6.37622	6.17269	9.5973	12.2376	4.0517	6.2792	10.9915	5.36492	10.156
CTCF	3.99619	2.82012	2.93361	2.80804	5.95088	2.95869	4.37065	3.66157	2.33667	4.66791	4.92792	4.2721	2.61432	3.92616	3.18885	4.02982	2.5192	4.45859	3.45195	1.85666	4.04376	5.20334	3.33398	3.46707	3.96417	1.06673	5.73043	2.76691	4.1417	4.63057	6.39156	2.97837	5.69463	4.1763	4.88864	2.97857	1.98733	4.76976	5.0008	2.62041	3.25896	2.70398
CTDSPL2	1.90704	0.827537	1.10548	0.577053	2.0993	0.470358	1.29834	1.63963	0.654937	0.980378	1.82994	3.99898	2.94512	1.72499	2.99565	2.17024	3.30863	2.43847	2.66385	0.100945	1.07178	1.69785	1.43981	1.3048	1.61875	1.53424	0.600977	2.14745	1.5695	1.19669	2.15085	2.291	2.65856	1.32934	1.76779	0.566993	0.49075	1.00177	1.89324	1.04097	3.0615	0.781756
CTH	9.68673	9.97726	11.6849	11.9903	6.17105	10.4675	10.9582	9.11029	9.61846	2.54628	10.7752	1.71222	2.68667	2.7413	2.44016	2.1489	1.91451	1.55623	1.82624	9.75505	7.50539	11.3008	9.79025	7.89072	12.0485	11.9054	10.7639	10.2127	10.8258	10.258	5.84993	7.92544	7.48306	11.2199	10.3979	9.398	12.469	2.60183	11.148	9.98793	2.4938	9.427
CTNNA1	6.77192	9.13522	5.00016	5.1563	6.0694	9.67547	10.0117	5.97339	9.48869	14.2085	9.88304	14.7255	12.5636	15.4239	13.7425	13.4699	14.9079	12.9767	15.1647	6.01809	6.88398	5.76879	7.06764	5.26185	7.16624	6.85095	5.96325	7.09995	7.53728	8.7029	6.36921	8.59529	7.95159	10.1586	7.65816	4.7365	4.48335	14.2987	10.1327	3.63093	11.7395	4.37475
CTNNB1	3.02361	3.43845	2.76595	2.19465	2.68139	3.6074	3.91659	3.85075	3.17585	6.3944	5.69393	5.78426	4.1685	6.32608	6.21805	5.657	5.53756	4.93663	5.36254	3.16797	2.3134	3.6031	3.70117	1.83322	2.75442	2.87125	2.17166	3.68985	2.5865	2.73804	2.76221	3.87257	3.59099	4.0101	4.63497	2.20066	1.83647	6.53392	5.78081	2.57303	6.35475	1.87573
CTNNBL1	5.81767	2.46268	5.94389	4.24022	4.05211	2.39298	4.11716	3.08858	3.93937	3.27671	3.97195	3.08512	1.38771	4.11965	3.7734	2.86339	5.24429	2.40334	3.07169	1.46059	3.62428	3.60944	1.48182	1.03214	3.73525	1.69005	1.52012	1.7019	3.10563	2.20932	4.15162	5.07126	3.51172	4.10469	3.74681	7.31619	10.3184	3.26446	3.5351	9.02979	3.85635	32.2249
CTNND1	4.00531	5.25352	5.72618	5.0149	5.06998	5.40896	5.39986	5.22733	6.43959	6.28986	5.82555	6.25505	4.55494	5.94653	5.29787	5.94737	5.51799	6.52563	5.67158	5.34459	4.87025	6.22412	6.20587	4.58625	5.9847	4.54778	5.01408	4.44786	4.65408	4.83521	5.19447	4.82317	4.98163	5.52879	5.89553	5.36361	6.31188	6.52422	6.12018	4.2344	5.47844	4.83716
CTPS1	13.7836	13.3035	24.5807	23.1906	14.3894	13.9572	15.6691	16.6426	20.1886	9.97718	12.7937	13.5799	10.4518	13.5581	12.8357	11.408	12.1781	12.5858	11.9054	15.2901	13.2061	12.8252	15.8405	16.5076	17.5658	12.4382	16.7486	13.2062	12.7472	13.5851	14.7427	13.7949	13.7485	13.2395	13.5663	21.9002	29.4012	10.1949	13.2363	21.0714	13.5347	26.7607
CTPS2	2.31046	1.83431	3.06169	3.63175	1.07259	1.92444	1.94253	1.66696	2.10635	0.771222	1.48818	0.998298	0.608181	0.900141	0.863957	0.769245	0.890767	0.899713	1.09746	1.29002	1.5587	1.32468	1.1054	0.722927	2.21982	2.07272	1.62082	1.53999	1.81196	1.88406	1.18618	2.36898	1.40013	1.98891	1.60272	2.32161	3.5947	0.788049	1.53967	2.2337	0.975591	2.40679
CTR9	2.41916	1.63127	3.12955	3.20787	1.98767	1.71142	2.46248	1.97412	2.20004	1.60626	2.50439	1.23445	1.78068	1.51849	1.68269	1.14266	1.61738	1.58416	1.77639	2.31051	1.50797	2.0122	1.48171	1.79138	2.82347	2.18856	1.73535	1.4625	2.0074	1.62791	1.99424	2.10773	2.16036	2.55123	1.8447	2.49133	2.8902	1.64131	2.43313	1.59186	1.75812	3.68905
CTSA	0.832719	1.43994	1.40714	1.63905	0.896721	1.51069	0.902138	1.40585	2.89713	0.0818493	1.55367	0.473402	0.326152	0.724441	0.995647	0.965083	0.731538	0.630277	0.73185	1.38124	0.718689	1.70936	1.94735	2.09758	1.45914	1.49442	2.07126	1.63122	1.60898	1.32719	0.918741	1.52456	0.835509	0.923678	2.00324	1.26978	2.24873	0.0836351	1.60743	2.90646	1.01754	1.56879
CTSB	3.95944	4.60914	5.9646	5.70321	3.78157	4.83561	4.51191	3.30701	5.70872	7.22873	5.7026	7.73024	5.30099	7.78409	4.96716	8.48157	6.71244	7.83088	6.22308	3.999	3.05664	2.82525	4.16546	4.74237	3.4105	3.54155	4.43731	4.85932	4.31567	3.60933	4.04493	4.19517	5.69665	4.61963	4.78193	3.92265	6.58352	7.38645	6.36515	5.76332	5.07636	3.69889
CTSC	2.28674	3.37511	4.80013	5.36309	3.08583	3.54094	3.22912	3.13403	3.74781	3.84064	3.41537	3.01759	3.6569	3.96163	2.32525	3.31274	3.83447	3.32677	2.07931	3.0229	3.17473	4.89934	3.8045	3.34713	3.07441	3.72193	3.65409	3.42605	3.21744	3.10383	3.1616	2.69743	2.4154	3.30622	3.5831	5.61405	5.62666	3.92444	3.53353	4.53625	2.37636	4.35009
CTSD	20.5249	8.93349	13.704	16.3098	9.05642	12.0132	17.016	13.9817	18.0143	14.3265	16.9946	15.1166	17.1032	18.3432	19.452	18.6726	20.13	17.5007	22.9379	16.6849	13.042	15.245	15.2991	11.2787	11.8022	20.6391	16.5595	14.4833	16.0346	16.3488	9.27881	17.2189	16.033	14.6443	15.8945	17.511	15.9943	14.6391	15.779	13.8744	14.4234	12.7376
CTSL	1.92213	1.4195	2.90906	2.45577	0.50133	1.48925	1.65403	1.26087	3.09807	0.62413	2.21623	1.89738	0.900094	1.43148	0.851578	1.74863	1.11703	1.45771	0.708541	1.39834	0.616372	1.22667	1.60326	1.11354	0.997605	1.27731	1.23441	1.48683	1.00714	1.4871	0.513641	1.11794	0.670538	1.69352	1.8251	2.08527	3.36802	0.637747	2.29291	3.61492	0.870299	2.10734
CTTN	8.88959	8.97436	8.54283	8.19257	16.9007	9.41531	12.8092	12.483	18.2069	7.86691	15.1242	8.97198	5.54636	7.15784	6.40457	8.16783	6.53802	9.83563	9.02799	14.1638	15.8352	14.2766	13.969	14.6929	13.4282	9.61842	11.6359	13.5994	12.0728	12.117	17.3157	11.0458	15.0041	11.3784	13.4821	7.78614	7.61444	7.2958	15.6474	9.67808	6.44675	12.034
CUL1	3.49799	3.60719	5.16634	4.27818	3.62684	3.78443	2.90804	5.17816	5.60784	3.91655	4.28719	4.56861	3.11417	4.15181	2.79367	3.41495	3.85633	3.36152	3.58623	3.35726	1.99357	2.8124	3.43293	3.82591	2.99519	3.70207	3.86053	2.89768	3.38009	3.17251	3.7159	4.80852	3.1532	2.86355	5.25166	4.51608	5.11743	3.72065	4.56533	4.06591	2.85509	3.83204
CUL2	2.10767	0.971447	2.6116	2.25697	1.89307	1.01918	1.69285	1.37152	1.72226	1.11356	1.77545	1.60307	0.750669	1.13632	1.56954	0.878642	0.95556	1.19399	1.03529	1.42772	1.45621	0.886817	0.98717	0.593077	2.06498	1.68152	0.66796	0.698342	1.03331	1.37449	1.93956	2.16206	1.13634	2.21402	1.95099	2.06115	3.37474	1.25291	2.0063	3.04281	1.68226	3.05664
CUL3	2.30546	2.17335	3.13706	2.45693	2.95254	2.43235	2.99954	2.82299	2.73177	1.42869	2.81438	1.43577	0.25009	1.15473	0.823792	1.37101	1.14773	1.1769	1.16403	2.35863	2.51635	2.07393	2.87374	2.516	2.85748	2.58488	2.34778	3.08367	2.72631	2.56095	2.79793	2.37878	1.95861	3.17272	3.16404	2.7445	3.75934	1.45987	2.62907	3.34688	0.841903	4.16961
CUL4B	4.82195	7.26302	9.24861	9.28763	6.45059	7.61989	6.63678	5.1289	5.70562	2.7704	7.3672	2.53315	3.24762	3.20501	2.49773	2.77574	2.85381	3.56123	2.762	5.52073	5.38077	5.83436	7.51274	5.00251	6.68522	6.21595	4.34388	8.10355	6.93295	7.51933	6.60899	6.5698	6.47005	6.69907	7.25079	9.32156	9.07425	2.6383	7.54941	8.60738	2.6034	9.60404
CUL5	1.70063	1.39357	2.79328	2.86206	1.35528	1.08977	1.79058	1.4045	1.59184	0.489887	2.22705	0.282991	0.426636	0.336221	0.478448	0.443227	0.583272	0.531481	0.221865	0.988278	2.03904	1.03009	1.38164	1.54389	1.33573	1.26382	1.42387	1.32737	1.21552	1.18886	1.38856	1.99175	1.2017	1.83333	2.02916	2.266	2.53579	0.500576	2.37507	1.57184	0.488967	1.95224
CUTA	18.9028	19.1008	44.6658	51.9042	15.3549	19.7985	12.1819	14.1344	50.793	14.5388	14.2567	10.6381	11.849	14.414	16.8609	9.60151	23.5694	15.0994	12.2212	23.6465	18.6951	27.812	9.86817	19.1392	25.1469	20.4462	21.2456	10.9887	16.9606	18.1854	15.732	20.0085	22.254	12.4728	15.609	44.4674	56.7251	11.3153	14.7499	60.2379	17.2316	39.5038
CUTC	2.7426	2.85263	7.43415	6.1294	3.11341	2.96596	1.91652	2.59781	1.20604	1.42236	1.67004	3.17484	1.07563	1.757	1.75682	3.18975	2.38945	3.31408	3.93728	1.8207	2.60051	2.3509	2.75426	0.835868	1.85771	1.89738	2.50808	0.873365	2.48264	2.0582	3.18986	4.01319	3.92186	1.96228	1.89853	4.76689	5.6811	1.55566	1.72781	6.02245	1.79544	3.95896
CUX1	22.0141	22.5807	13.7424	15.1823	10.3374	15.5131	10.1344	15.8567	17.0503	14.3225	12.0773	15.977	18.5056	16.1509	17.8522	15.0029	52.7959	18.4314	38.5207	19.5602	10.7598	21.8659	10.3416	12.6579	14.8338	12.5683	13.173	12.6665	13.8351	13.1265	10.5913	19.1956	14.2652	10.3763	16.3578	12.1794	9.61058	17.6647	12.4951	12.7384	18.2446	9.02574
CWC15	4.35717	11.4355	2.30869	3.71889	8.4837	11.9974	3.38683	3.07053	3.90615	9.59657	5.13356	4.91214	7.97475	5.81721	5.70412	13.4012	7.69491	6.81703	5.63274	7.53157	4.72006	5.25356	10.8736	3.79681	8.70099	6.71632	8.03846	9.01548	8.88653	11.0661	8.69202	7.7484	12.0966	3.46769	11.8871	7.08258	7.96575	9.80595	5.31117	6.92265	1.46486	8.2451
CWC22	0.58211	0.475876	0.843693	0.532444	0.668478	0.499258	0.539062	0.496528	0.186623	0.546187	0.619343	1.09355	0.396254	0.917799	0.247119	0.420335	0.447467	0.865472	0.618506	0.456673	1.05234	0.412917	0.280356	0.369476	0.463686	0.230199	0.371964	0.43226	0.293007	0.349068	0.710177	0.925396	0.522111	0.551933	0.590248	0.573754	0.887016	0.558104	0.64077	0.878177	0.252552	0.714116
CWC27	4.24985	2.01082	4.25491	6.24114	2.71333	2.10962	3.37451	3.62539	5.04861	1.98277	4.31408	2.39886	1.14051	4.13536	2.85946	2.18998	4.5277	3.87929	4.11628	2.38074	3.29129	4.62972	2.32043	1.68021	3.50557	2.56818	2.13832	2.56137	3.44721	3.0082	3.21091	5.9705	5.12736	3.45508	4.65952	6.86308	3.6509	2.02603	4.46333	3.83735	2.92233	3.94044
CWF19L1	1.80668	1.07021	1.79713	2.44409	2.12194	1.12279	1.6798	1.75804	2.08146	1.3253	1.32487	0.943976	1.38056	0.724373	0.85058	1.05508	0.940644	1.1672	1.1575	1.77146	1.42391	1.23486	2.11799	1.90729	2.26014	1.18615	1.73395	1.55013	1.7873	1.99602	2.17404	1.62382	1.43336	1.71991	1.19524	2.32516	2.25368	1.04154	1.3707	1.41247	0.869279	4.9713
CXADR	1.25908	0.70956	1.28083	0.593867	1.6244	0.660595	1.86927	2.24763	3.59168	2.67334	2.13714	2.57012	0.353918	1.7981	1.65616	2.05946	2.74869	2.8215	1.69138	0.821989	2.12138	1.4323	1.23915	1.34465	1.89468	1.19002	1.22797	1.69334	1.07456	1.49753	1.66429	0.889296	1.39609	1.9139	2.503	1.44906	1.52009	1.91708	2.21108	0.618517	1.69257	1.70925
CXorf26	8.5834	3.82876	5.24135	4.85929	3.0365	4.01688	6.16553	7.46964	9.48461	4.66446	6.59397	4.65443	5.68842	5.59268	4.10257	5.50223	5.29149	4.69458	4.92142	3.41407	5.58555	3.23987	4.92374	6.84664	5.47368	8.72277	5.16873	3.78133	4.35777	4.76929	3.11106	6.07787	3.0579	6.31274	4.94774	4.64413	6.05424	4.76623	6.8221	5.20222	2.32986	9.70612
CXorf56	2.74986	2.36456	0.9306	1.04142	1.7343	2.48074	2.83227	2.2505	1.60408	3.24591	1.38163	3.44783	1.9845	2.18967	2.52843	3.62842	3.32544	1.95794	3.71065	2.55744	1.81108	2.87297	1.8203	1.49914	2.94778	3.28378	2.24983	3.08614	1.98248	2.50448	1.77688	2.78164	2.41599	2.89989	1.94425	1.93648	2.27694	3.31673	1.42943	1.59776	2.02012	1.94168
CXorf57	1.53861	1.03949	2.72868	2.77284	1.00392	1.03063	1.178	1.47998	2.85004	1.32394	2.15144	1.3541	1.56838	1.86814	1.25626	1.23371	1.10495	1.84151	1.32222	1.43205	1.00746	2.10797	1.4713	1.49009	1.49766	2.01312	1.31853	0.733909	1.40403	1.60174	1.06697	1.35623	1.63653	1.20612	2.17611	2.19329	2.61095	1.35282	2.22587	1.78805	1.28388	1.96028
CXXC1	0.734941	0.290545	1.10861	1.0926	3.36664	0.304821	1.21682	1.13326	1.93912	0.0667601	1.39599	0.853376	0.194559	0.957475	0.11226	0.787236	0.49504	1.08508	0.368307	0.697671	1.48163	0.437444	0.637684	38.6268	0.472948	36.4011	1.18056	0.853949	0.551042	36.9434	3.2891	1.42976	1.37188	0.79354	1.47515	1.03572	19.5912	0.0682167	1.44429	0.999939	0.310566	13.5588
CYB5A	18.8665	20.4428	6.9514	14.8697	21.6069	21.4473	27.0277	28.994	38.5351	61.0949	35.4414	64.7026	47.7928	52.8663	32.269	66.9057	59.7611	53.5415	54.0815	7.57396	17.1193	18.2482	20.7743	15.4049	23.2532	25.2303	15.7799	13.1405	11.9308	15.2791	22.1375	25.2217	20.2923	26.4126	36.2366	12.221	4.3175	62.4279	32.8215	15.3759	26.3007	12.7855
CYB5B	32.362	44.0825	31.7954	38.138	42.0504	52.1751	39.9755	41.3741	85.6806	77.9137	60.4359	79.5344	33.1301	67.133	45.0279	67.7054	62.4215	81.8414	86.3476	55.0101	34.2639	81.3621	56.7949	40.3925	76.3991	41.6349	44.5351	51.8329	50.7093	55.3452	43.083	51.6003	50.393	40.9299	60.329	47.4605	39.8205	79.6136	62.5268	32.9105	46.0178	31.3514
CYB5R1	4.32679	5.35785	5.7441	6.80473	5.53116	4.20144	5.02011	3.5532	3.92451	3.78539	3.96992	7.70572	4.48043	7.27492	9.683	4.26319	7.54275	8.24025	6.08684	2.78576	7.36108	2.66858	2.4808	1.17019	2.85361	2.58729	3.13533	3.49019	1.18726	3.22898	5.66698	7.1399	5.38346	5.13997	3.65115	7.02516	5.22234	4.4601	4.10727	3.76173	10.3048	4.64756
CYB5R3	52.1243	73.6401	50.2619	46.0946	49.5925	77.2094	64.3199	63.5215	63.0125	76.1221	72.204	76.1141	68.2902	92.8845	88.5131	87.7348	82.2264	91.7121	90.5491	55.6312	50.3533	49.1887	53.4309	60.6762	47.6452	58.3217	63.2981	49.2783	51.5672	48.0766	50.4747	65.0557	40.4065	65.8556	61.9703	53.9555	65.5708	67.6749	74.702	59.7218	80.7825	38.2138
CYC1	16.4123	13.0633	13.4662	12.3138	11.4838	12.7949	15.7501	19.2326	12.4138	31.8907	14.6243	28.5877	33.6633	28.3651	27.5025	32.8533	28.9817	31.856	28.6479	13.3252	16.1977	12.7269	16.351	14.6363	12.9644	13.5832	14.0723	12.5822	10.2002	9.13244	11.7658	20.5053	11.4404	16.1262	15.5932	13.8554	14.8141	32.5865	15.1302	13.3106	28.1071	9.48842
CYCS	95.4109	144.424	155.652	190.609	160.836	151.52	121.957	75.1881	57.5312	146.006	105.778	130.373	247.955	132.831	114.815	124.244	108.933	110.969	109.411	132.775	189.108	94.4197	123.486	53.0078	106.352	150.49	106.151	114.104	115.122	121.403	164.148	84.804	71.3843	124.869	104.682	130.618	201.268	149.192	109.438	173.033	117.339	168.541
CYFIP1	2.27341	2.15566	3.14789	3.04073	7.44229	6.45374	2.90277	3.49855	2.00784	1.20975	2.87639	7.20713	1.69078	1.22709	0.955943	0.820341	6.36069	1.11205	0.75763	2.51449	5.46949	2.65773	2.63663	2.29264	2.6627	2.84615	2.81775	2.5238	2.32932	2.11035	7.71506	2.48902	1.82985	2.97208	2.5524	2.84388	4.6654	1.23615	2.90978	2.84518	0.976959	2.70471
CYP51A1	1.56419	2.25318	2.1302	2.85806	2.65186	2.36389	2.64807	1.89602	2.38042	7.42659	3.74377	8.89276	6.72371	8.24246	7.91489	5.54824	7.13781	6.95859	5.5501	1.92423	1.76794	2.04273	1.93877	1.35297	1.45128	1.66701	1.74232	2.01858	2.02527	2.29964	2.71698	2.19194	2.24806	2.71129	3.13833	2.41307	3.24316	6.38409	3.8733	2.20601	6.57484	1.57105
DAD1	24.223	19.5716	35.293	31.3563	20.2253	20.5333	23.0567	26.7827	29.3141	38.3345	24.7503	47.5572	36.367	48.2938	56.7561	39.4144	35.7333	49.5582	56.5567	15.5685	22.1141	20.0819	24.1904	29.1672	28.6662	30.0197	26.145	23.9189	22.7252	22.4632	20.722	18.7062	19.8627	25.6783	31.3128	29.5545	17.4743	20.6853	27.3074	31.4358	58.0039	24.8159
DAG1	2.36417	2.49805	1.22948	1.34166	2.22973	2.62079	2.62772	2.19306	3.19935	1.1832	2.70188	1.12033	1.10646	1.31305	1.5862	1.48163	1.57429	1.47085	1.58157	2.24671	1.96694	2.64505	2.54946	2.27356	2.98578	3.14366	3.02382	2.38601	3.04903	3.38187	2.28449	2.2632	2.71897	2.69047	2.71516	1.18296	0.964133	0.970891	2.79535	1.03681	1.62107	0.961037
DAK	3.58473	3.68188	4.49054	3.69469	2.93545	4.65481	4.81297	3.82393	5.08983	1.36192	4.91222	1.73203	1.33342	1.31238	1.3135	1.46691	1.56987	1.7898	1.56827	3.50612	3.83837	3.22569	3.8395	2.33393	5.08992	3.78781	3.11706	3.86445	4.25788	3.8669	3.00753	4.52263	3.28018	4.69116	4.86799	3.47154	6.29535	1.39164	4.74987	3.89274	1.34238	2.78257
DAP3	8.4305	5.46206	8.94689	9.57042	7.17355	5.55641	9.4047	6.84486	12.6921	21.6006	8.63145	18.0898	27.4727	19.6868	22.8248	17.2171	16.8928	19.934	19.6387	7.81305	7.12947	7.76814	5.97011	5.86726	6.16711	6.4562	9.18033	8.62888	10.1349	9.12969	7.3497	4.83148	6.98985	9.62925	7.75824	7.76138	8.607	22.1601	9.27048	7.7926	23.0879	9.48481
DARS	21.0003	22.6262	36.3656	31.5131	24.6175	23.679	26.1492	26.4276	22.713	16.2922	26.5385	17.1505	14.926	17.2777	14.7074	16.5402	17.2013	17.2068	15.3972	21.0051	23.1086	24.9772	28.6633	22.6039	23.6461	20.9442	21.3681	26.7031	24.9038	25.2809	25.222	20.8566	20.9462	26.8399	26.8672	29.3616	30.1472	17.8335	27.4566	35.4652	15.0263	25.2738
DARS2	9.01309	7.9582	18.628	22.8886	6.14054	8.34922	8.47922	8.09713	23.5658	19.6169	10.5221	21.3441	16.4106	20.0031	23.0836	15.4624	22.0312	21.171	19.3564	12.2295	7.91697	9.63718	7.75052	9.10015	10.7705	8.40148	11.407	9.38708	9.19734	9.59564	5.92082	10.9083	9.49923	8.14939	10.2312	22.7092	21.8558	19.8611	10.9935	21.712	23.5911	16.5442
DAZAP1	24.2974	26.4923	95.9589	98.9087	33.7466	27.7939	15.4689	31.3125	36.737	37.4243	33.0255	40.9027	43.6404	32.6257	39.7614	23.234	27.5627	54.3035	50.9389	25.2778	31.9286	29.0433	24.9914	29.4897	25.3221	22.7593	29.3416	20.628	18.7696	19.5331	31.6844	33.746	24.2038	14.9853	23.3086	89.4398	63.9784	34.4164	30.7515	87.8589	36.5722	76.247
DBI	14.355	9.17071	79.6009	64.3809	25.7599	9.62131	17.191	15.2468	33.6291	19.0802	23.7271	27.6616	9.86934	13.1831	21.0112	23.2671	16.1138	21.2819	16.4953	45.845	12.3746	20.736	35.8338	26.444	32.7073	35.9723	35.2694	30.3394	22.9616	22.1975	26.3925	14.7875	29.2878	17.6015	17.4483	68.1621	78.9291	19.4965	24.548	60.5482	21.4731	52.1466
DBN1	21.4806	20.444	19.8254	19.3821	24.514	21.4485	22.2455	23.5128	31.2769	30.2668	26.7986	51.0215	22.0437	29.6282	32.8129	42.6036	35.8098	43.0453	43.5564	19.9572	27.0381	20.4023	22.7381	24.7255	19.4093	20.173	25.6063	22.9624	21.4225	23.1932	25.116	28.6764	24.542	22.7766	26.1593	19.16	17.5591	30.9272	28.0556	21.702	32.4898	17.9191
DBNL	41.044	11.907	32.387	24.1663	28.7727	12.492	25.8586	26.255	22.6785	12.9062	31.8328	17.9762	9.80427	14.9878	15.1879	19.4589	14.2491	23.9312	19.0105	23.3465	39.4036	31.8307	28.0531	28.4688	34.6448	20.6904	22.1984	24.2594	17.1705	25.1431	29.4793	36.2285	29.9901	26.476	34.6286	29.1075	23.9049	13.1878	32.9341	27.6448	15.5218	24.9864
DBR1	3.26168	2.81785	3.16528	4.71052	6.6452	2.9563	4.27422	4.012	3.45669	1.61878	4.26042	0.587561	0.309413	1.78007	0.814165	0.598044	1.12508	0.617263	1.12495	4.52616	4.39194	4.01822	2.09729	3.97298	4.32177	4.92764	3.6959	3.64126	3.77311	4.03613	6.43557	3.42953	2.96664	3.91725	3.76313	5.0956	6.77836	1.6541	4.63969	5.23225	0.531415	3.86104
DBT	2.0768	1.43432	4.11239	4.457	1.71421	1.50479	2.04156	2.46936	2.42106	4.09563	2.56514	3.74503	4.11685	3.83253	3.91781	3.46452	4.16262	3.98985	3.90228	0.910996	1.02773	2.15368	1.03402	1.31176	1.09618	2.1844	2.67195	1.42014	1.79822	3.64888	1.7563	2.70604	1.55583	2.09031	1.70185	4.35255	6.16642	4.18499	2.65388	3.42785	4.00394	2.90289
DCAF13	2.85032	3.03523	1.00349	1.27357	3.32871	2.90753	2.21896	2.83455	1.715	3.05309	2.49743	3.8941	3.56104	3.70839	3.24587	4.15896	3.70212	4.51776	2.52712	2.78114	2.47017	3.22685	2.32514	3.23466	4.01879	2.72407	2.72469	2.63824	2.82561	2.94917	3.45438	3.30662	2.71208	1.68257	2.53386	1.5994	1.23974	3.1197	2.58383	1.00101	3.31723	1.33293
DCAF16	2.6836	2.34245	1.29367	1.0136	2.18858	2.45755	3.46219	2.44161	5.76022	0.801657	3.00851	1.45469	0.87799	1.76015	1.60934	1.32742	1.63687	1.84483	0.579444	3.04962	2.50582	1.58436	4.46887	4.49659	1.51518	4.19459	2.2455	1.198	0.458318	2.52337	2.24232	2.88515	3.80651	3.54486	3.35703	0.869563	1.75007	1.78276	3.11259	0.298943	1.64472	0.679266
DCAF7	2.41612	3.21222	5.1509	7.93129	4.83616	4.59112	4.91378	4.51761	4.35887	2.10523	5.33807	1.31851	1.29287	2.36626	1.82656	1.57308	3.51619	2.08139	1.83799	3.48234	4.71318	1.50719	3.12212	3.89748	5.62388	3.84193	4.04701	4.42774	2.43815	3.61661	4.27512	2.94027	2.5317	3.93932	6.5808	8.50534	9.32319	1.98023	3.90701	7.7351	2.46926	7.06239
DCAKD	1.89146	2.02958	2.10985	2.62107	1.46802	2.12931	2.25219	1.77044	1.2009	2.95315	1.96604	2.43356	3.40888	2.04855	1.49508	2.16693	1.77009	1.79439	1.14885	1.77803	1.54463	1.72471	2.91362	1.90914	1.57817	2.40759	1.91774	2.43877	2.19626	2.83505	1.50407	2.24726	1.90628	2.30596	1.90632	3.23747	2.4278	3.01758	2.03406	2.94105	1.52795	2.3563
DCP1A	7.10713	7.30414	5.88035	7.20655	4.17063	7.66302	6.77301	5.08015	4.59793	7.30211	8.27457	3.82475	4.6417	5.03054	5.20247	5.1783	5.23451	3.80016	3.47422	5.54745	5.52468	6.83095	4.42142	3.21343	7.89574	5.11952	4.36177	3.53764	3.10642	4.18134	4.27305	6.56594	7.5767	6.93472	7.00671	4.0394	4.86199	7.46143	8.35332	4.15154	5.31684	5.00707
DCPS	2.88521	4.06586	6.21721	5.38046	5.18347	3.00921	3.69883	5.4585	5.5685	2.63442	3.88608	3.87109	2.49975	3.26775	2.70354	2.65461	3.43238	3.65159	4.30751	4.39857	4.21592	2.35524	4.44767	3.57403	2.41743	3.06549	3.62753	2.64981	2.89552	1.70197	5.31076	8.09545	4.15161	3.78715	3.11474	6.26082	7.11777	2.6919	4.02053	4.36798	2.76297	7.56707
DCTN1	10.604	12.3283	9.11432	9.68799	6.7937	12.8626	10.5182	11.5629	11.1112	6.47153	11.9123	6.16803	7.42456	6.18436	6.3368	5.83942	5.90382	6.92479	6.0223	11.8823	8.53089	10.1711	8.50509	7.90015	12.0989	9.82521	9.77669	9.07944	9.90692	10.647	6.47927	11.4614	8.7625	10.9087	11.2466	8.75897	11.1676	6.67287	12.2884	9.4423	6.47611	7.72127
DCTN2	19.1743	19.8883	19.842	15.048	21.873	20.8655	23.8817	20.2262	27.6434	14.9956	24.4143	18.0861	12.0928	16.4361	18.384	16.554	17.1729	17.7233	20.643	25.17	23.7396	31.5578	22.0499	21.7545	25.8077	23.2377	21.758	18.7256	21.9507	21.619	22.5415	25.3415	22.9814	24.4519	23.1211	16.8458	18.3195	15.3228	25.259	20.443	18.7881	20.6552
DCTN3	1.08579	5.29499	5.03908	4.05863	3.89251	5.55515	4.9026	4.27126	6.40752	3.59364	4.88729	2.05092	1.06409	2.81727	1.22074	1.82497	3.09389	2.96638	2.08934	5.06521	3.97692	5.70889	5.90717	5.89715	3.64238	4.92868	5.11165	6.57823	4.67552	4.66657	4.76951	5.50549	0.78824	5.01966	4.31915	3.6398	3.3635	3.67205	5.05638	4.04711	1.24757	3.01951
DCTN4	5.03895	3.76769	3.04956	3.66579	3.53261	3.95281	4.08337	3.58322	4.42923	2.12977	4.25321	3.83639	1.7272	3.90993	3.09028	2.64054	2.55329	3.95109	2.97191	4.67292	2.33142	3.46078	3.75082	5.72136	5.32811	4.73732	5.77978	2.61603	3.53023	2.0462	3.61936	4.73351	4.80314	4.18086	3.7645	4.31169	3.66401	2.17623	4.49685	4.04222	2.96536	2.78501
DCTPP1	23.6466	26.4002	24.111	25.6443	19.831	27.4567	26.8996	26.3559	30.7603	26.4233	20.7766	33.4881	26.1299	33.5635	27.179	33.5123	34.5408	35.7724	32.0149	24.1445	32.7388	31.7063	29.8783	23.3884	26.8782	28.2785	24.186	20.5369	26.7428	22.9787	20.2143	27.5215	36.5792	27.5419	28.3799	28.8593	26.0775	27.1939	26.6828	28.8833	27.7765	32.6612
DCUN1D5	3.3592	8.76295	2.15558	2.27226	4.71112	9.19352	1.53846	1.87975	2.0697	1.38905	1.99325	2.64897	1.54212	4.17819	2.02722	0.538902	1.92777	0.718113	1.72948	2.11534	4.83957	3.59809	2.77495	2.33688	2.35006	2.16945	2.25454	4.12333	2.78212	3.6477	3.10346	3.15967	3.33548	1.78239	2.60771	2.67188	3.26245	1.41936	2.06221	3.10187	2.07178	3.8315
DCXR	3.55072	3.7273	8.60376	7.87904	3.89446	3.91044	4.39116	4.44576	5.3026	3.55047	2.819	6.66957	5.40281	5.73583	3.89029	5.51226	5.56644	7.34181	4.9738	4.61905	3.80202	4.62705	5.09185	3.23014	4.35681	4.34962	4.58932	3.57142	3.85195	3.97218	3.86314	4.8583	3.02147	4.496	4.55944	9.87487	7.3958	2.47979	2.91653	8.23614	3.97581	6.6811
DDAH1	9.53462	6.81834	7.80391	7.31007	3.40577	7.15336	7.89906	5.54081	8.66518	1.69203	7.89871	4.13013	4.3945	1.77511	1.77645	2.5524	2.37611	2.07042	2.13063	4.94335	6.79678	7.79367	7.00756	4.63541	8.11293	7.47184	5.41077	17.8249	6.8706	17.1382	3.20469	7.81391	6.20873	7.75974	6.89831	7.20326	7.53322	1.72894	8.17198	7.38743	1.8155	5.18801
DDAH2	2.31507	1.75926	2.10234	2.05141	2.24713	1.8457	1.13934	1.53193	3.64408	0.452783	2.56406	0.98981	0.844198	0.260612	0.34712	0.154632	0.721073	1.28797	0.772535	1.19576	1.62301	1.85753	2.32968	1.53766	2.42413	1.02832	1.46099	0.492783	1.76402	1.32182	1.98318	2.43964	1.45543	0.915049	2.5839	2.62984	1.33352	0.462662	2.1644	2.22781	0.354751	1.66454
DDB1	11.5371	13.0561	23.9045	23.3528	12.7312	13.7703	14.0669	13.097	15.8327	8.84039	12.9114	10.7148	10.2634	10.2428	9.72489	9.97105	12.9973	11.4431	9.54686	11.278	10.7624	11.945	13.2479	11.0339	14.9315	13.0052	12.7269	11.4423	10.6161	10.9644	12.7396	13.31	12.5131	14.1929	13.3588	21.1567	21.9208	9.09503	13.4131	20.3329	10.0643	21.2975
DDI2	4.45656	3.70531	1.51286	1.97848	3.01828	3.88737	3.23091	4.08656	3.79254	4.74195	3.18663	2.40646	1.46319	3.77144	2.47941	3.7257	3.01994	4.29356	2.59247	3.39546	3.65932	5.1366	4.13618	4.59471	4.80484	3.66442	5.94008	4.68149	4.919	4.98829	3.18679	4.66642	4.63225	3.30805	5.65492	2.66397	2.12718	4.69558	3.92056	1.86101	2.53392	0.907832
DDOST	14.8902	20.7954	19.5858	21.4939	14.6877	21.8171	20.0015	18.1497	25.9368	34.2686	22.063	34.7644	37.9233	43.3892	40.7417	30.4282	33.8763	32.0154	37.8848	19.4452	18.3255	29.2035	21.7083	13.8791	22.7122	12.1171	16.7347	13.2874	8.84404	16.7952	15.0484	18.8814	13.0341	20.3654	16.2284	21.1203	28.3102	35.0163	22.8263	16.2979	41.6374	23.75
DDRGK1	14.4373	15.4128	7.74948	7.23422	9.55868	19.2268	11.049	10.8907	19.6295	16.8591	11.3827	17.7849	7.58566	16.2076	15.0155	18.772	16.5881	16.2873	17.6154	15.9154	11.5341	8.08599	8.8573	6.74243	10.5543	8.05299	11.0515	9.08475	8.81008	7.81094	9.6444	14.929	14.991	9.87403	13.6453	5.08122	9.74316	16.1484	11.7765	7.5378	15.3456	3.74686
DDT	60.9534	86.6125	91.8709	77.4993	56.9143	86.4436	94.4684	86.0341	114.899	63.1987	85.7956	48.726	71.8002	45.1738	58.879	64.7257	51.3057	47.9163	47.7571	77.9976	72.8918	80.7114	75.9974	63.8733	72.6878	90.7883	81.8802	72.8215	59.5527	59.8138	58.3119	88.4388	55.8948	67.8478	96.7046	76.327	92.6721	64.5775	88.7639	96.099	60.1734	69.2427
DDX1	22.9037	20.0281	32.9828	29.638	25.8589	21.3119	22.9619	22.6593	30.3636	19.8364	27.6148	20.098	23.8037	22.0966	19.1417	17.7532	19.6905	20.1125	21.6595	29.9128	22.0686	28.9983	22.9468	26.9807	26.6038	25.3223	24.0975	22.5601	22.4969	23.8169	25.371	24.335	22.038	23.5608	23.9239	34.5306	34.9199	20.1207	25.6799	31.537	19.5625	32.9818
DDX10	1.54292	1.01525	1.66532	2.21102	1.25917	1.06513	2.23752	0.928824	0.906755	2.53146	2.0545	3.84204	1.42056	3.27339	2.24432	3.1105	3.34312	2.86582	2.93561	0.662387	1.70271	0.871834	1.09324	0.941062	1.15345	1.28677	0.736449	1.8807	1.36413	1.58173	1.29009	2.12643	1.41425	2.13735	1.98797	2.13905	2.3338	2.58669	2.12172	1.35052	2.29366	1.6798
DDX17	81.2783	84.6706	88.5874	81.9872	96.5164	88.5324	83.9008	84.7353	57.1607	74.4817	87.1497	79.2389	70.8465	75.842	68.5929	72.3048	74.6572	70.8803	70.186	76.1579	92.706	75.7343	88.1725	83.7382	85.1227	89.2904	95.5988	88.5872	79.2116	77.7336	98.8864	84.425	93.2015	85.6468	87.5343	81.6526	90.3314	74.5555	90.0862	81.5851	69.9428	101.695
DDX18	13.6816	12.1526	9.95085	9.94697	12.9568	12.7498	16.6294	16.3137	10.4469	20.4558	16.4542	17.4284	14.3291	21.9095	18.0868	19.4691	22.5205	17.6818	16.2775	11.814	11.9108	13.8923	14.7917	15.0641	14.9289	15.362	14.4721	15.6749	13.1567	12.9856	12.7089	16.7835	13.0614	14.7588	15.9535	9.18778	10.7389	18.8539	16.249	9.23343	15.2459	7.81214
DDX19A	8.07363	6.29813	11.5665	10.2451	12.8211	6.60758	10.2605	9.63235	11.5324	5.25567	11.4175	6.08221	2.89396	7.55264	6.1425	5.44045	7.58047	9.00861	8.1327	7.07156	10.8889	6.27384	3.83563	6.7906	9.4761	7.3027	7.64064	7.75225	7.803	7.99059	13.136	12.355	7.71982	10.5055	11.688	10.5701	10.875	5.37034	11.878	11.8169	6.27754	10.9129
DDX20	1.99378	3.39602	3.30188	1.72627	3.53456	3.1791	4.7406	3.82064	6.16634	5.1304	4.22897	4.93465	5.78643	4.04812	6.16465	5.39816	5.53693	4.45846	4.35956	3.47282	4.49331	2.60417	3.20676	2.45957	2.98913	3.93735	3.25023	3.12751	2.8836	3.26027	3.62135	5.10669	2.00063	5.71972	3.3052	2.72785	2.54604	5.59016	4.5995	1.96455	6.4314	2.95908
DDX21	68.3945	75.012	21.7594	23.8192	62.7503	80.1258	58.1884	58.3423	59.0183	82.8926	55.6055	96.8999	89.0557	91.5846	88.4889	88.9478	90.6077	91.3933	85.9315	65.4581	68.6504	77.8232	64.1504	67.4892	67.8905	60.0837	60.5743	64.3133	70.9819	66.6516	64.2911	72.7003	59.493	59.5777	64.7124	20.8336	28.6463	84.7967	57.5109	23.7984	88.9842	21.9497
DDX23	4.86086	4.09753	4.9249	8.00506	3.64498	4.29886	4.97643	3.96427	3.67085	5.46864	4.4219	4.52767	3.10059	4.89528	3.27493	4.12693	4.55461	4.65319	3.43971	3.87533	3.54954	4.65575	4.39045	2.85301	4.33053	4.35407	4.27456	2.25259	2.51898	2.39586	3.68572	4.76538	4.99824	5.09525	4.39373	4.59872	5.71515	5.58795	3.82747	5.73129	3.40441	6.02701
DDX24	1.51812	3.1392	0.215842	0.165081	2.94437	3.15917	3.18196	2.44937	2.96511	4.52682	3.2637	4.85933	3.48736	4.0246	4.4756	5.15266	4.00178	4.47223	4.79741	2.27777	3.3078	2.92069	2.25715	2.14694	1.87433	1.62432	3.10934	2.10512	1.86578	1.83237	2.92381	3.84169	2.68764	3.18981	3.31868	0.14719	0.0618504	4.4054	3.37661	0.175179	4.57399	0.0392084
DDX27	5.6629	3.80008	3.75553	4.61853	5.69038	4.65544	6.02865	5.29151	5.06232	7.85252	5.18083	7.46051	8.99183	7.98547	8.16851	7.16822	8.41757	6.40575	6.8671	5.35495	5.77007	6.36194	5.3059	5.54971	6.2207	6.28261	5.97436	3.30154	4.7069	4.44226	5.78549	5.24325	3.89231	5.51917	5.36038	4.73167	4.13776	8.02385	5.45323	3.63394	7.88831	4.73256
DDX39A	4.55673	2.16881	8.44994	8.97179	12.6562	2.27537	4.49335	5.759	7.54574	4.34565	4.55124	3.2108	1.86082	3.51295	2.24191	3.23867	4.2739	3.72619	4.26362	1.51152	14.549	3.35433	2.28559	1.90531	5.42357	3.37371	3.05754	2.5422	3.00057	3.50839	12.967	4.27622	3.47742	4.60063	4.25826	11.4911	10.1485	4.37563	4.70869	11.2108	2.2912	18.63
DDX39B	150.617	107.439	177.654	160.401	158.699	112.344	133.206	132.496	129.761	91.7063	115.44	84.9792	74.4675	95.9203	91.4385	82.3171	93.8434	84.8319	75.3999	119.762	155.698	140.405	112.001	121.429	136.562	149.288	102.233	120.935	119.103	119.738	163.18	160.433	133.676	136.386	131.702	182.391	147.116	93.7072	119.434	190.528	93.405	187.89
DDX3X	19.0234	17.4743	24.0921	23.4996	22.6122	18.2576	18.1222	18.4862	19.9862	21.1753	18.324	20.8839	22.9924	17.3506	21.8435	15.8586	20.4426	16.4684	17.3372	19.5543	22.9233	22.3093	15.5068	15.0164	22.4043	14.5889	17.2435	18.8975	16.5523	15.0229	23.1675	16.9844	16.2454	18.5549	17.876	22.0157	31.3759	21.6374	18.8735	27.0148	21.6849	31.4056
DDX41	3.71136	3.94659	5.69181	4.9419	3.79184	4.14051	3.67679	2.72904	2.6828	1.77973	3.79965	2.32888	2.85025	2.32688	2.00781	2.69673	2.5083	2.28391	1.95024	3.07564	4.03799	3.39137	3.13121	2.63024	4.25066	4.21237	3.37097	2.7523	2.9408	2.7768	3.52274	4.76518	4.14782	3.59149	3.71394	5.25913	5.59515	1.81856	3.9311	4.59063	1.96208	8.01231
DDX42	8.69121	9.08969	8.9114	7.39514	7.38517	9.5363	10.0773	9.37258	11.4181	6.57787	12.0502	5.40658	7.26429	6.01386	5.44261	5.95117	5.75656	5.4058	5.50515	10.3689	8.42111	12.5383	10.5679	8.86322	12.1038	9.06341	9.05959	8.69018	9.17192	9.56711	7.69432	9.71224	11.8087	9.69729	11.3931	7.80079	8.90046	6.31167	12.0095	8.45246	5.56226	9.88678
DDX46	9.16099	7.56729	12.5184	11.5	9.11564	7.79454	11.2638	10.3138	8.6962	5.6952	11.9673	6.6922	4.18076	6.16325	5.07276	5.90775	6.33843	5.95698	5.78473	7.50163	9.3825	7.39607	9.56594	8.38857	10.4157	10.3664	8.37582	10.5778	8.8772	9.05177	9.3272	10.5857	7.91979	11.4066	11.7091	12.3629	12.4712	5.86063	12.5031	12.5732	5.01137	13.9616
DDX47	10.6903	9.35248	9.09184	8.36931	11.1449	9.81201	11.2046	11.756	11.836	18.183	11.7117	14.9028	11.8651	16.8201	14.2962	12.5166	18.4349	18.7237	15.1557	7.77584	12.4111	11.6332	8.17105	5.30393	12.3323	8.30187	9.91476	10.5907	7.88244	12.0732	11.4186	11.2269	8.75384	11.4721	12.4107	6.00264	10.6274	18.7164	11.7824	7.85722	14.4996	7.42173
DDX49	1.72572	1.90315	2.32839	2.15338	0.992526	1.99666	0.973778	1.07718	0.588314	1.93651	1.70579	2.01049	3.03221	2.70177	1.66548	2.1421	1.95176	2.541	1.62049	2.12891	0.818474	2.65523	0.955786	1.55748	2.87474	2.44337	1.22825	1.66645	1.35299	1.79247	1.0169	1.71615	2.57715	0.997028	1.50686	1.43332	2.37358	2.07338	1.7648	1.77838	1.70209	1.61061
DDX5	35.4484	31.1733	50.8902	51.7436	30.0816	32.705	28.0755	24.7762	24.5338	36.2098	31.5025	51.7967	32.1649	47.3492	46.3755	43.0863	48.418	49.8126	44.2221	25.0301	31.1224	25.7631	25.5939	25.1561	27.3626	31.7817	24.6023	31.1897	30.4168	26.9023	30.4378	31.5472	28.1652	28.7459	27.7574	47.3586	55.2781	36.7293	32.8215	52.1034	47.3951	43.771
DDX50	2.43592	4.40992	5.88384	5.09183	4.48413	4.39139	4.42049	3.98712	3.71231	2.61168	4.55086	3.62771	5.5808	3.88686	4.6449	3.29333	4.22236	3.3672	3.92529	3.47115	4.60036	3.12024	2.68661	2.86815	3.60244	2.98837	3.35138	3.33533	3.34156	3.39623	4.59424	3.22874	2.8507	3.9409	4.01617	7.2746	6.6178	2.66866	4.7083	6.51593	4.97304	5.58276
DDX51	1.64045	1.83371	3.44588	0.969491	1.57155	1.92381	1.84852	3.90599	2.29121	4.8262	2.47522	2.91938	4.72432	6.09832	5.3755	3.50058	5.46022	3.19586	3.65876	2.56135	3.77457	1.40582	2.05	2.40274	2.81845	2.17912	3.36043	1.59974	2.4743	2.77267	1.61014	1.9209	1.6522	1.71916	2.18728	1.91145	1.11356	4.9315	2.56086	2.07043	5.49368	1.86643
DDX52	5.27105	7.48136	0.971362	0.889725	3.71462	7.84896	5.51607	5.45757	5.44755	6.25137	5.48715	6.15678	6.13115	5.47644	7.17738	5.44797	5.1267	6.23251	4.27283	5.20371	5.92856	3.44593	3.79945	5.54617	4.63055	4.69915	3.53749	4.78568	5.19803	5.59985	3.80584	4.73064	4.47773	5.64778	5.05235	0.868854	1.02535	6.38776	5.67698	0.487691	7.43177	0.706537
DDX54	3.20307	2.68341	1.39744	1.97287	3.37706	2.61778	3.32143	4.07492	2.27758	3.604	3.696	3.89039	3.09165	4.3033	3.11495	3.23414	3.90684	4.30204	3.66447	3.30956	3.73518	3.24971	3.65237	3.47769	3.74028	3.94807	3.29412	2.92652	2.93027	3.61642	3.49332	3.96618	3.83748	3.21246	3.24505	1.50175	1.84749	3.68264	3.30375	1.4673	3.26221	1.80229
DDX56	2.26626	2.35512	0.773705	1.26842	3.25479	2.47084	2.37075	2.41901	1.25762	4.23313	2.02622	7.93583	3.66667	5.56263	7.1662	4.69345	5.28809	5.36691	7.1125	1.69451	5.25904	2.39294	1.82501	2.07753	2.7436	1.99184	1.98273	2.06508	1.68204	1.56441	3.33472	4.52807	1.76565	2.82082	1.98375	0.760295	0.759923	4.32549	2.09632	1.04004	7.32374	0.847951
DDX6	15.7184	14.0659	15.0967	12.8141	15.741	14.7571	25.0033	20.1047	11.1063	16.1029	22.5116	17.7088	20.9526	17.9773	14.192	16.4052	16.3766	13.9114	16.9293	17.5299	12.8638	19.3811	19.2833	17.6543	17.2438	19.9103	14.5455	15.6412	17.0391	17.2427	15.7166	14.449	16.0461	23.8719	24.5138	13.596	14.8009	16.5491	23.2904	12.8557	14.504	12.9093
DECR1	2.19442	2.18602	4.086	4.31845	1.35085	2.20867	2.4342	3.39827	5.99381	3.44399	2.66201	4.92503	5.4745	4.71749	5.69524	3.25969	4.02427	4.15347	3.35021	1.69969	2.34337	1.23023	2.60247	2.53075	2.18594	1.70769	1.86255	1.48742	2.23082	1.61266	1.38403	2.81707	2.08121	2.49232	3.48998	4.28248	5.57674	3.39922	2.75411	4.4912	5.5812	3.13351
DEK	41.8947	40.1531	43.3454	37.6001	47.2919	42.5372	40.6035	38.214	37.1843	62.377	43.9956	52.2179	50.2101	58.8349	44.0871	54.7255	48.7061	54.0491	47.1502	35.2249	41.583	41.8707	43.9264	33.4261	38.4759	43.01	32.604	49.4795	41.1568	40.0346	48.4532	47.2025	42.9913	41.573	49.7576	40.2248	40.2326	62.247	45.4673	48.3175	46.2532	39.8317
DENR	27.8886	14.5296	9.91003	7.78221	18.7313	15.2435	12.3643	11.4971	18.1882	26.0938	17.4939	21.0386	1.98533	27.1229	11.3982	28.9921	18.3173	26.7701	31.8337	11.3719	28.8073	18.919	13.4409	10.6027	19.5793	12.5116	12.2128	13.5856	14.7324	12.2072	19.1913	25.7373	28.5746	12.6595	14.7293	13.3976	8.34947	26.6631	18.0991	9.58321	11.6487	12.529
DFFA	155.474	150.76	113.896	112.806	149.396	158.168	127.544	123.317	176.504	116.074	130.301	110.559	112.879	121.044	93.1333	103.054	112.433	117.436	108.105	189.765	144.352	120.644	166.398	167.733	135.977	122.856	135.63	132.826	141.722	141.58	143.879	159.214	110.592	130.589	143.556	123.904	126.162	195.449	134.809	114.982	95.1807	137.918
DGCR14	0.973162	1.21311	1.07176	0.754975	1.33541	1.27272	1.43919	1.27453	2.75267	0.853101	2.513	1.59999	1.1572	2.14895	1.01931	1.39656	1.39317	1.51638	1.5478	1.31207	1.88278	1.84852	1.69005	1.20796	1.37837	1.25474	0.924136	1.58761	1.94655	1.43624	1.54493	1.45668	1.52806	1.47355	2.74297	1.1937	0.62483	0.871714	2.59994	0.848426	0.611931	0.859667
DHCR24	2.44915	1.1787	2.73104	2.09967	2.15072	1.23661	1.88305	3.8521	3.45383	2.49678	2.64581	1.59515	1.61877	2.34251	1.27545	1.95467	2.57041	2.22735	2.12418	2.12457	1.64225	2.21759	2.9461	3.2268	2.42232	2.41085	2.35475	2.40404	1.82	1.75174	2.20353	3.15729	1.65754	1.92801	2.95588	2.75315	2.74749	2.41495	2.73735	2.32434	1.30349	2.23887
DHCR7	2.03034	1.69305	5.21633	5.1759	5.02882	1.77624	1.99448	2.60051	4.41323	2.55427	2.26742	2.09908	0.812276	2.18449	0.395081	2.19224	2.67048	2.08273	2.73622	0.989607	6.96368	3.06868	1.44668	1.66841	2.10788	2.66499	1.92659	2.3583	2.33925	2.13514	5.15231	0.989433	1.87186	2.0421	2.62362	9.99499	5.68948	2.61	2.34587	9.0993	2.62189	7.78242
DHFR	3.99786	5.31375	3.76535	5.86943	5.58296	5.26202	5.33349	4.15217	5.67469	5.99451	5.6616	6.09673	3.27974	5.08945	7.20809	5.69816	9.49246	7.8277	7.74273	3.26619	8.26282	3.18631	3.75098	4.45923	5.16824	4.30178	4.90709	5.14951	5.09158	5.71909	5.88649	8.08862	4.05822	5.46084	5.27389	6.23515	3.3656	6.37519	5.46959	5.61161	7.36655	2.53868
DHODH	0.436119	0.902862	1.60468	0.609544	0.867785	0.947223	1.48247	1.09666	1.25444	4.15779	1.41187	4.70598	3.02625	3.85124	2.9144	3.44907	4.08449	4.13307	3.74303	1.13548	1.01264	0.494339	0.57956	0.645713	1.19868	1.11211	0.922723	0.841442	0.681519	0.655989	0.889094	0.775592	1.05846	1.51786	0.839853	0.951813	0.800586	4.11294	1.60258	0.796599	2.86136	0.884978
DHPS	1.54037	1.55801	1.47523	2.4079	0.954069	1.63456	2.11993	1.54214	1.34193	0.641146	3.0373	0.931967	0.523874	0.46431	0.428558	0.537705	0.736431	0.245237	0.382625	1.93501	1.20212	1.64141	1.42282	1.08495	2.15528	1.71402	3.05414	1.1198	1.36907	1.01757	0.977497	1.24213	1.9954	2.17054	2.86191	2.07317	1.98447	0.655134	3.14238	3.96203	0.274796	1.14649
DHRS7	7.42243	10.1116	7.58205	8.30015	6.53065	10.6084	10.72	7.15506	10.2208	5.38035	9.02945	3.66103	3.11764	3.88753	5.39655	4.02303	4.54712	3.85888	5.44755	8.64464	10.6611	11.7066	6.43658	8.92358	8.48342	9.17504	9.27413	4.24137	8.51397	8.92898	6.69102	10.0533	7.33757	10.9759	10.4333	8.81257	6.4698	5.49774	9.34184	7.29768	5.62143	6.64614
DHRS7B	3.39655	1.93266	2.28899	1.23968	2.05889	2.39536	2.26612	2.16549	1.16915	4.07289	1.66675	3.94736	4.22298	4.2483	4.36485	3.07622	3.91718	3.27219	5.38359	1.13814	1.98547	0.878108	0.581478	2.48395	1.5926	2.63937	2.37829	0.84613	2.63397	1.52433	2.10945	1.26915	1.0214	2.32023	2.40861	1.53651	2.40433	4.01016	1.72441	1.08486	4.59596	1.28063
DHTKD1	0.885735	1.30728	3.58793	4.29339	1.06734	1.37152	2.25891	1.60826	1.13773	3.08712	1.75552	2.91423	2.03566	2.50152	2.61845	2.54075	2.78744	2.35813	2.45369	0.653475	0.771716	0.624281	0.510346	1.09579	0.839775	1.13127	0.799815	0.687031	1.34943	1.31503	1.15622	1.05065	1.68851	2.20913	1.47451	3.53014	3.69895	3.15448	1.81626	2.99288	2.76678	3.2962
DHX15	20.9268	18.7004	40.4702	40.5164	20.4127	19.6193	28.7619	27.5518	20.5501	16.5742	29.2442	15.8497	13.0655	16.0927	13.5824	14.4168	16.0223	16.3944	16.4268	20.8694	22.6002	24.8271	22.7028	22.6216	25.4419	28.4668	22.9051	26.0313	21.4066	21.1822	19.6728	21.4306	17.1723	25.0344	27.1053	41.3368	41.8922	15.8639	29.1888	42.9379	13.3218	41.0358
DHX16	2.13178	2.26035	3.17901	3.02021	6.69003	2.37141	2.78438	12.3869	3.20376	2.37267	13.3885	2.07575	1.65545	1.92885	1.16109	1.58764	1.92296	1.73222	0.952483	1.38447	1.89078	2.31686	2.51345	2.39626	2.40725	1.84941	1.2608	1.56482	1.97775	1.42616	6.85431	2.00917	2.60077	2.91997	12.022	2.82131	2.58043	2.4026	13.8517	2.95662	1.25374	2.11827
DHX29	0.563791	0.319537	0.619	0.595473	0.394162	0.335238	0.520318	0.505966	0.512533	0.21648	0.624848	0.616841	0.273568	0.587064	1.15911	0.408117	0.515827	0.758284	0.330681	0.511347	0.412174	0.511858	0.447123	0.533323	0.548063	0.571087	0.364994	0.544728	0.561488	0.581748	0.403841	0.605897	0.493926	0.532741	0.386859	0.511243	0.680613	0.221204	0.721358	0.499235	1.1846	0.363828
DHX30	4.10655	5.48703	5.74677	5.94904	5.4954	5.35605	4.93218	4.13337	7.73966	11.2924	5.76942	10.0691	13.7956	11.2219	11.2995	9.63547	10.4142	9.98165	9.00923	5.8891	4.52481	4.77588	4.62672	5.86274	6.23011	4.56504	5.22241	4.47045	4.75536	4.49657	5.45884	5.18813	4.41104	5.04994	4.28733	7.17495	8.92393	11.3329	5.76968	7.70218	11.4437	6.6923
DHX36	3.54219	2.09794	1.53984	2.27757	2.36864	2.359	2.94986	1.782	2.46872	1.68764	4.06794	2.08977	0.90372	1.36648	0.476869	1.75381	1.72226	1.18652	0.833861	1.63967	3.35155	1.69819	1.45765	1.6691	2.55282	2.83674	1.32211	3.08519	3.36797	3.16857	2.5116	2.85111	1.95505	3.02029	3.67644	2.8902	2.36543	1.54662	2.93237	2.16319	1.40592	2.48023
DHX37	1.13813	0.604597	0.313085	0.330346	1.24628	0.634303	0.890874	0.796008	1.04803	1.63332	0.689516	2.73573	1.30141	1.30569	1.09559	1.61505	1.89399	1.38477	1.88196	1.71522	0.807708	1.30986	1.14121	1.29066	1.41676	0.965476	1.15319	0.478075	0.870601	0.782157	0.856606	1.12358	0.791623	1.15219	1.27562	0.411658	3.56208	1.66895	0.713371	0.139022	1.11968	0.302114
DHX38	0.906513	0.702389	1.60675	1.77153	1.13076	0.736901	1.57056	1.45982	2.67872	0.839934	2.23053	0.694558	0.595581	0.989862	0.373732	0.6562	0.581528	0.755223	0.664372	1.21918	1.07887	1.61645	0.818166	1.20631	1.32324	1.44133	1.65021	1.52798	0.953793	0.969284	1.25699	1.74178	1.55749	1.60806	1.96058	1.65646	2.34427	0.85826	2.44446	2.08667	0.381949	1.65704
DHX40	0.666205	1.20989	1.12305	1.56928	0.419694	1.26933	0.626659	1.35069	1.62171	0.406613	0.668255	0.465524	0.638049	0.563912	0.399588	0.460636	0.378736	0.387183	0.371048	0.790735	0.974739	0.362145	0.864493	0.540893	0.425736	0.67056	0.977029	0.728101	1.12985	1.13555	0.43	0.771911	0.609741	0.641621	0.790014	1.44333	1.78644	0.415485	0.691375	1.15978	0.408372	0.971335
DHX57	0.719553	0.538055	0.604742	0.402151	0.304107	0.489491	1.18878	0.629084	0.469913	4.325	1.10796	0.749132	0.713962	0.856182	0.440257	0.70534	0.858488	0.749612	0.626216	0.615603	0.364261	1.18798	0.646553	0.796779	0.709114	0.386363	0.51691	0.662017	0.72096	0.454674	0.32702	0.713594	0.811097	1.21716	1.13404	0.498858	0.89873	4.44687	1.14629	0.319707	0.449936	0.328454
DHX8	0.889439	0.676528	1.35697	1.21709	0.610088	0.709769	1.20539	1.28937	0.822772	0.820723	1.70288	0.810559	0.408191	1.06313	1.36964	1.04166	1.31022	0.929937	1.22456	0.77161	0.866974	1.0826	1.14387	0.919571	1.68818	1.30274	1.0704	1.04355	0.657707	1.35849	1.02112	1.47479	0.941616	1.91747	1.76558	1.75174	1.78611	1.21115	2.27432	1.98357	1.68618	1.43943
DHX9	73.5765	66.6453	73.7322	71.4823	63.802	69.9738	61.6537	67.5782	59.854	70.1604	67.1293	65.237	69.8382	72.251	68.2815	68.9725	71.0364	66.6527	71.8837	80.0178	70.6982	75.3489	66.466	65.8454	72.814	78.2764	78.4482	65.8544	64.9664	64.6878	65.3687	64.5006	75.3089	60.0565	61.1085	73.778	96.2469	73.1425	69.4059	79.0827	67.3285	76.6129
DIABLO	14.6187	17.3357	23.2514	24.2703	16.648	18.1874	30.2871	13.4276	18.3065	10.7693	2.08272	60.6278	114.957	23.8535	15.0802	20.0553	20.3779	25.873	52.6489	8.98264	32.0714	8.48793	11.5591	10.7866	7.07722	9.19543	3.19937	9.53759	8.46214	10.3201	17.0568	11.9483	10.7196	31.0103	9.14511	21.5034	20.713	11.0043	2.15478	24.5947	15.4117	19.2334
DIAPH1	3.51063	3.09714	3.5319	4.06831	3.07068	3.45142	2.8159	3.5661	4.68305	2.33209	3.62823	2.41401	1.69012	2.56892	1.79805	2.08081	2.17463	2.49229	1.53539	2.24657	3.50761	3.75176	2.39161	2.68431	4.18097	3.28875	2.4348	2.92273	2.86354	2.85728	3.32304	4.90036	2.72419	2.63753	3.83667	4.15198	3.12205	2.43509	3.75376	3.5047	1.83758	3.4914
DIAPH2	0.513873	0.345231	1.90959	1.33751	0.409844	0.362194	1.06081	0.808001	0.940707	0.281803	0.955654	0.189273	0.0808634	0.067795	0.058141	0.147896	0.157153	0.0962776	0.0543123	1.20822	0.503897	1.58872	0.469571	0.563819	1.66577	0.320065	0.673498	1.47772	0.539523	0.535507	0.444378	0.349425	0.268586	1.08614	1.57786	1.72653	1.86854	0.287952	0.988716	2.33513	0.0594192	0.560796
DICER1	0.324472	0.310371	0.414487	0.302082	0.236205	0.29296	0.275763	0.218581	0.378356	0.205623	0.376522	0.287914	0.280638	0.385688	0.219125	0.326915	0.34323	0.501588	0.28054	0.344009	0.150108	0.221291	0.255669	0.18323	0.252499	0.29651	0.333895	0.27392	0.223678	0.129116	0.254509	0.339707	0.185454	0.278448	0.31318	0.198353	0.283289	0.21011	0.359743	0.145762	0.177112	0.160781
DIDO1	0.874806	1.3043	0.572168	0.689003	0.911864	1.32337	1.29	1.50823	1.41531	1.02527	1.82025	1.12467	1.28552	1.07823	0.674174	0.933547	0.967003	1.1014	0.880037	0.988013	1.04231	0.991582	1.18544	1.27131	1.06849	1.0793	1.6892	0.987484	1.0041	1.09606	0.984486	0.940151	1.45258	1.60474	1.59197	0.606543	0.618328	1.04764	1.8664	0.48758	0.730861	0.43781
DIEXF	2.0126	1.26343	0.907823	1.84146	1.62005	1.3255	2.40365	1.88464	1.32643	2.78695	2.14992	3.06726	2.21778	2.72244	1.68587	2.95282	2.2687	2.93481	2.0333	1.4508	1.26288	2.06892	1.92093	0.612562	2.21261	1.21754	2.13266	2.43403	1.95725	2.84469	1.65983	2.13811	2.77937	2.46104	2.13461	1.54079	1.73476	2.84776	2.2243	1.64836	1.72294	0.662446
DIMT1	3.96081	4.3945	4.63839	2.53162	2.31947	4.35641	4.51523	4.65871	1.6422	3.06834	4.47562	2.32479	2.01678	2.92548	2.65573	3.23042	2.46214	1.63141	2.09138	2.28323	3.12581	3.76628	2.72733	3.95273	5.12638	4.39302	4.17265	2.44731	3.91649	2.93894	2.37642	4.60289	3.34059	4.62304	4.63876	5.16667	3.73168	3.13529	3.48797	3.29672	2.71412	2.7851
DIP2B	0.16379	0.271746	0.178021	0.112557	0.16127	0.247121	0.183645	0.2202	0.155209	0.113104	0.307451	0.138113	0.0597022	0.0538003	0.0892401	0.0172397	0.220849	0.342688	0.234878	0.127728	0.234236	0.149985	0.154635	0.339747	0.279036	0.134854	0.150155	0.0269081	0.214522	0.0980185	0.165231	0.330504	0.0874185	0.215868	0.140815	1.24685	0.128658	0.115572	0.318087	0.112775	0.0517397	0.0255123
DIS3	4.57829	5.73788	7.03541	7.3355	5.61422	5.92966	6.2037	5.24622	8.25629	9.08285	6.49462	8.14017	8.27161	9.81821	6.76334	8.5406	8.73641	8.26321	8.90235	6.17338	4.69738	7.21354	4.99694	5.27699	6.66487	5.99975	5.80446	5.46588	4.68645	4.59593	5.45615	6.88548	4.80907	6.28635	7.61128	8.46557	9.44518	9.28103	6.38204	7.287	6.91203	6.76556
DKC1	15.244	22.0108	10.0449	12.2646	17.7155	23.0446	13.1244	16.1096	15.2532	15.5043	13.0873	17.131	16.734	16.521	17.7568	17.5316	14.7848	13.3101	13.8553	13.9322	25.3407	20.9228	13.773	10.7467	20.3058	13.5401	12.1378	12.9942	17.4799	16.4444	18.1506	17.2129	19.4497	13.3216	15.3772	10.7813	13.9821	15.8426	13.5401	13.3061	18.2379	16.4367
DLAT	10.5393	17.9917	20.2845	18.2663	10.8608	18.8758	16.4293	18.8835	20.2808	33.07	18.0374	30.9895	33.1798	28.3343	41.6924	28.4948	30.5253	29.9768	30.6989	13.9025	12.8577	14.2861	11.3489	14.5018	12.2942	14.0574	14.3046	11.7023	14.1312	13.9806	11.1275	17.3614	12.7244	16.6207	17.1175	19.069	22.3109	33.7915	18.6614	23.3447	42.3445	15.5262
DLD	21.2443	19.0733	41.1381	41.6083	28.5688	20.0104	21.5267	20.8604	29.8372	34.8845	17.1933	58.3562	43.9351	51.1748	53.1475	42.5833	37.5997	58.0554	53.9681	21.0681	28.2868	17.6276	13.8679	15.4971	18.6737	18.7451	20.9763	15.7977	17.1834	17.9601	29.2704	26.8605	17.6743	22.0407	17.5579	38.0834	40.1103	35.6456	17.7881	54.1409	54.428	41.0024
DLG1	1.0803	2.27099	1.37957	1.30984	1.60438	2.5912	2.58688	2.1218	3.23453	1.61979	2.7668	2.68694	2.16265	2.51392	1.63379	2.41202	2.03392	2.57748	2.12826	1.81371	2.09464	2.14934	2.30377	1.97135	2.33988	2.4429	2.05242	1.57546	2.62721	2.84331	1.64378	2.6717	2.51876	2.69461	3.36156	1.04163	0.863764	1.65513	2.66711	0.54112	1.93977	1.72434
DLG3	3.60855	3.79554	2.6946	1.60024	2.78005	3.98203	3.31057	3.18708	5.88109	1.511	5.08282	1.69858	1.22654	2.42142	1.96197	2.05267	1.71382	1.94149	1.38137	4.94363	2.93592	3.96599	4.66593	5.22233	5.11169	3.92323	5.70726	3.4752	3.30601	2.28783	3.39056	2.74879	3.64202	4.3761	3.73764	1.61441	1.08531	1.54397	5.25866	1.41536	1.55507	1.1454
DLGAP5	2.09317	1.29273	2.64922	2.34783	0.946887	0.678123	1.91384	1.94452	1.75067	1.27359	2.06266	1.26425	0.480117	1.56394	0.817115	1.80048	1.14501	1.73863	1.27372	1.40589	1.34621	1.41551	0.86308	1.16834	2.44456	1.40639	0.778835	1.20491	0.760035	1.02828	0.970139	1.35587	1.01187	2.2375	2.85776	0.73748	0.886046	0.970685	2.33828	0.251264	0.835078	0.325067
DLST	10.703	9.37435	10.3798	9.94082	5.77442	9.25107	11.2557	10.2134	13.8111	16.7663	11.2789	10.9449	13.5372	14.5071	14.3872	15.92	12.6019	12.5558	14.8049	10.26	8.9288	11.0402	12.0092	12.171	11.5869	12.1114	9.28694	9.55106	9.7248	7.08093	5.91621	9.44802	7.16027	11.5244	9.81363	11.9252	9.27889	17.2218	12.1444	10.2512	14.6396	9.1551
DMAP1	0.301135	1.00257	0.609771	1.30154	1.34433	1.05183	0.22782	0.349146	1.43742	0.710512	0.665218	0.819864	0.164914	1.03044	0.812049	0.773061	0.587896	0.520303	0.84153	0.879797	0.594092	0.559744	0.637667	0.457308	0.869584	0.692677	1.2248	0.206185	0.176348	0.106962	1.37734	1.43144	0.905349	0.233259	0.817509	0.902807	0.612212	0.726014	0.688232	0.621742	0.492788	0.578185
DNAJA1	11.1441	13.9034	12.9332	12.7465	12.4486	14.5866	10.5393	8.98294	11.6997	24.6713	14.6654	21.3668	27.0654	22.8691	21.3116	15.6095	20.437	22.1664	19.2047	11.7866	14.6675	11.9359	15.8023	15.6104	13.1718	12.3184	13.5523	15.9397	13.7942	11.41	11.2312	12.1858	13.529	10.6183	9.42006	18.4948	22.7352	25.2096	15.1728	14.177	21.6838	11.5462
DNAJA2	4.34786	8.71742	9.74202	9.1762	9.63964	9.14575	6.50014	5.50143	12.5264	8.03528	6.21457	7.69251	6.8315	6.95428	7.82213	7.45738	8.43336	8.53994	7.44095	7.70043	10.3755	6.93306	5.29766	7.4314	5.87675	4.55746	4.65826	5.75436	6.23847	7.88749	10.2535	6.58751	2.92226	6.63286	4.82902	10.5474	8.79092	8.21059	6.42957	9.1568	7.99409	18.723
DNAJA3	10.8849	13.2218	21.7205	19.8638	4.46064	6.7366	10.3957	7.42368	10.9508	27.5889	9.01477	20.4917	17.1942	21.4243	18.4044	18.6355	17.3896	16.6931	22.3334	6.25285	2.82908	5.84838	5.54789	6.47561	6.08802	8.6778	7.52931	7.52204	7.0823	7.56577	4.4651	7.51591	6.91926	10.6439	8.06248	11.0676	11.0982	27.807	9.32665	11.5271	18.1492	6.74993
DNAJB1	11.3842	12.6139	9.75917	8.08729	8.5684	14.4975	9.01895	10.7541	7.86298	5.2207	14.0352	8.02574	7.76928	6.04805	9.3239	9.14949	7.85843	9.57165	8.60947	13.4836	10.1588	12.6883	11.7295	14.5342	10.1143	10.2696	14.8188	7.9967	11.5769	9.63184	9.40631	10.6282	8.82635	9.69314	10.091	12.8735	12.4051	5.33461	10.8855	11.5822	9.52888	9.11896
DNAJB11	9.22264	10.7061	8.61678	8.50841	7.52116	11.2322	14.8895	14.0197	13.2185	19.5018	13.9061	12.9103	7.71282	20.0129	11.8039	14.3214	20.8869	15.6006	15.2299	12.3901	9.30098	12.0498	12.8646	11.9144	12.079	15.0409	13.0895	7.45789	7.20205	8.83926	7.70584	9.35401	8.83442	15.245	13.8876	9.28425	6.79621	19.0715	13.4327	8.58647	13.6311	4.51865
DNAJB6	1.27858	1.14019	1.82913	1.90617	1.12034	1.19621	0.855135	1.56272	2.44726	4.67669	1.09821	2.61596	2.3855	3.35672	3.2121	4.18701	3.8557	4.25218	3.73398	1.70305	2.2263	1.31787	2.2511	3.25452	1.72	1.92873	2.0948	2.30668	1.20144	1.11631	1.29593	1.22304	1.33901	0.875552	1.06093	2.06625	2.24145	4.77873	1.13621	1.55194	3.28271	3.07118
DNAJC10	0.733608	0.873129	2.22705	2.60785	1.4049	0.798361	0.616772	0.196729	1.77768	1.81412	0.749565	2.06462	0.921518	2.21056	1.44442	1.49748	1.77451	2.73446	2.15714	0.52156	1.59982	0.52574	1.00704	0.239508	0.796273	0.221497	0.393098	0.591853	0.858666	0.710435	1.4394	1.15089	0.695282	1.3773	0.739259	2.7294	2.16949	1.85371	0.775497	3.467	1.55238	4.13547
DNAJC11	2.3234	1.46647	1.88232	2.69054	1.84832	1.53852	1.51302	1.36528	2.54446	9.34115	1.74736	6.88397	5.39073	8.58211	6.49635	7.23825	6.89048	7.08612	12.6348	1.91584	2.3062	2.04673	1.24097	1.77612	2.45659	2.37739	1.72981	1.00204	1.80968	1.26804	1.8937	2.24746	2.37564	1.54914	1.60746	2.69964	2.98993	9.54496	1.80781	1.65492	6.63916	2.55304
DNAJC13	0.368676	0.409108	0.535938	0.393268	0.24616	0.429209	0.494588	0.422732	0.542641	0.107909	0.431193	0.0692798	0.0838022	0.192968	0.0442538	0.144484	0.142845	0.0858585	0.0692869	0.445579	0.388294	0.392812	0.417808	0.277161	0.622585	0.472163	0.465336	0.306697	0.319818	0.242341	0.258925	0.467869	0.482794	0.506397	0.514821	0.445711	0.498563	0.150339	0.481102	0.150856	0.0690676	0.348381
DNAJC17	1.21644	0.965926	0.846237	0.468723	0.692924	1.01339	0.456272	0.610504	1.86909	1.35559	0.720838	1.00496	1.07899	0.866101	1.26065	1.23476	1.7214	1.67713	1.48432	0.649838	0.822424	0.673685	0.965731	1.10638	0.724314	0.845298	0.906919	0.812481	0.68555	0.427087	0.709939	0.999784	0.375453	0.467166	0.983417	1.73609	1.52935	0.9506	0.834481	0.691476	1.28836	0.878492
DNAJC19	1.6181	2.94656	2.18712	1.69261	3.12668	3.09134	1.01965	1.2844	1.93536	3.82719	1.47762	2.92995	3.45275	2.93036	1.37118	2.58935	3.27335	2.83528	1.85006	2.22852	2.11834	1.73156	2.90823	1.70939	1.92096	1.52665	1.6425	1.35474	1.23014	1.43315	3.20346	1.64411	2.06661	1.04399	1.5727	1.55917	1.63304	3.91069	1.52874	1.36898	1.40132	2.46524
DNAJC2	2.76956	2.25533	2.93781	2.63682	4.23413	2.36615	3.37929	2.42778	2.55401	2.85616	3.75788	4.17552	2.96433	3.25596	2.61417	3.27118	3.51524	3.48816	3.06606	3.0762	5.1048	3.05834	3.45666	2.85891	3.76978	2.79439	1.67575	2.57352	2.62682	3.06861	4.3381	2.94779	2.34787	3.45998	3.53475	2.51536	2.60037	2.52332	3.95146	1.5585	2.67198	2.41601
DNAJC5	4.11616	5.98693	2.52587	2.87597	4.6118	6.2811	4.58671	2.68645	4.11092	8.53172	4.5208	6.77708	7.91829	8.28078	7.22947	8.24465	7.67518	7.95076	6.43226	3.12516	3.0296	4.27733	5.14368	2.20297	4.07856	2.01171	2.36812	6.14191	6.96036	6.40975	4.72504	4.46256	4.26625	4.69622	5.43127	5.41875	2.53976	8.71787	4.6772	5.5302	6.10015	2.59676
DNAJC7	6.39045	4.35805	6.12256	5.43187	8.50993	4.57218	8.51893	7.115	6.33717	8.26695	9.14651	8.64881	3.52941	8.3702	5.40883	8.00781	7.91959	10.0359	8.14648	8.14071	8.46081	8.12553	6.18955	6.05484	8.51562	7.04833	8.59301	4.94966	6.62573	7.23756	8.7189	6.63867	8.08712	8.72233	7.8482	5.67457	5.81543	8.44732	9.46295	5.41053	5.52774	7.62958
DNAJC8	9.82973	7.85841	9.1581	9.96003	17.4989	8.24453	10.8707	11.1285	19.4867	30.8633	9.08703	11.2712	7.95753	24.9566	10.0116	22.1423	12.6934	22.9704	13.2254	12.9518	14.9237	14.0443	12.1474	12.6575	13.6884	13.6742	8.90287	17.0425	13.8085	11.6178	18.9854	11.6485	13.7948	11.1303	5.25345	13.2502	14.3006	31.5367	9.40141	8.93703	10.6349	17.9769
DNAJC9	5.26928	1.68791	4.36193	10.3919	11.462	1.77085	4.31976	4.05114	9.96941	14.7014	6.11674	14.1018	10.0162	14.1878	14.2304	7.69754	11.9769	15.9143	14.2371	12.9816	6.45417	7.11076	2.867	3.19455	6.29889	3.79357	3.4725	3.19223	2.64985	3.19317	11.7435	3.31068	4.51084	4.708	6.97795	6.86399	7.17276	18.2231	6.32836	6.61558	14.5433	12.6563
DNASE2	3.08192	3.68212	1.75394	2.04342	2.84871	3.86304	3.27548	1.70407	2.08978	3.57918	3.59248	3.22853	3.48173	0.671412	2.90124	2.79547	1.25135	3.23973	4.97763	1.61449	3.20501	3.05116	3.0225	1.07007	2.64879	1.85561	2.383	3.56592	3.29092	3.04205	2.91867	3.02172	4.23291	3.35368	3.41402	2.04204	2.38703	3.65727	3.71677	1.4901	2.96502	1.87049
DNM1L	41.1593	49.0345	67.3579	61.3175	37.9463	51.9422	53.7754	55.2456	58.2703	36.9191	61.9366	36.1994	32.8235	40.9107	40.9224	37.3697	35.1982	46.0997	31.5528	46.1844	42.9368	30.9933	40.6385	41.3761	38.4466	42.7882	45.5325	43.8789	47.6436	52.8393	38.8781	49.4858	32.1291	51.8061	53.7002	57.738	72.288	38.6468	62.2183	48.7706	42.0264	53.5492
DNM2	31.474	31.0091	38.7302	45.4792	16.5373	17.0896	12.5964	19.3159	23.0985	12.0898	15.6015	14.5934	12.2423	14.5368	10.1761	11.6099	11.3444	11.649	12.9573	14.2279	13.6705	14.7171	12.0439	14.9363	15.8945	9.26649	11.21	12.0735	12.5504	12.6031	11.5228	12.6525	13.6832	8.56699	13.3112	12.4359	19.0351	8.39666	10.7608	15.6167	6.93343	12.6745
DNMT1	24.4264	23.1504	21.8651	15.4424	12.1757	12.3917	13.2464	11.2947	10.5241	10.0032	16.739	9.09785	6.95518	12.0112	8.24176	9.01542	15.5974	10.2919	8.88571	12.9677	11.0937	12.3485	12.0442	8.71437	11.8916	13.8504	8.09704	13.9285	9.6271	10.1312	11.0622	11.1444	10.2993	10.4257	12.7309	11.9438	12.6707	10.3526	12.6893	8.17274	7.98188	7.81675
DNMT3A	0.420261	0.343498	0.723892	0.618012	1.01067	0.360376	0.204229	0.183024	0.308689	0.526473	0.444031	0.437716	0.20499	0.684998	0.238983	0.420771	0.392499	0.558052	0.649646	0.268643	0.086351	0.260734	0.179825	0.175318	0.336696	0.217309	0.37705	0.177315	0.433156	0.354007	0.116091	0.231376	0.68815	0.209105	0.388628	0.368112	0.654804	0.53796	0.459393	0.468128	0.244237	0.142769
DNPEP	2.67762	2.52996	3.40092	4.08476	2.57509	2.65427	4.0255	4.07517	3.10762	0.957211	3.88431	1.06689	1.65866	1.26969	1.10637	0.522956	0.467718	0.455398	0.60489	2.85123	2.47412	3.86221	4.05406	3.70577	2.92962	2.82576	2.37226	1.78057	2.52792	2.39842	2.77274	3.31117	1.7971	4.12162	2.83673	4.16199	4.01842	0.978096	2.40073	5.34792	1.13069	2.50598
DNTTIP2	4.72707	4.21058	1.77625	1.7876	3.26649	5.25124	2.97944	3.2468	3.82984	11.4183	3.07444	8.596	7.70868	7.96593	6.29393	9.74544	7.88392	7.03574	7.55142	4.37548	3.51886	3.84586	3.10243	3.68926	3.30062	2.88145	3.54973	3.25694	3.18646	2.66543	3.41874	4.63465	5.15347	2.53953	3.10178	1.99681	1.60759	8.67744	2.97675	1.96077	6.4323	1.64882
DOCK7	1.6626	1.64848	2.1812	1.79735	1.35625	1.80721	1.60419	1.72237	1.84444	0.672163	2.2063	0.768245	0.525761	1.05696	0.727585	0.841931	0.777927	0.943519	0.559734	1.74208	1.67021	2.09512	1.90073	1.88969	2.16147	1.74759	1.52737	1.46414	1.44599	1.38268	1.34923	1.72733	1.80991	1.64249	1.93835	1.54926	2.26702	0.681344	1.98876	2.19789	0.74358	1.87917
DOHH	2.09728	2.46363	1.63515	1.49481	1.68347	2.58468	2.16401	2.9743	3.22237	2.72896	2.71662	3.95465	1.40057	5.4844	4.1461	5.02733	5.58444	4.91061	5.36523	1.55041	1.91316	4.05509	0.84785	2.07478	1.54687	2.61767	3.2977	1.69384	1.81544	2.21916	1.57865	2.3963	1.15473	2.21568	2.61751	1.10479	1.35732	2.7885	2.8106	0.554566	4.72628	0.367622
DPF2	4.62328	2.53677	3.21953	3.78006	4.22476	2.66141	3.83441	4.78657	5.09595	2.96394	5.46658	2.62168	2.2509	3.83403	2.11241	2.47469	2.86131	3.38862	3.25247	5.18622	3.39885	6.25716	4.48031	3.88293	5.88178	3.31855	4.4147	3.69554	2.45245	3.18845	4.3285	4.71441	3.00806	3.92596	6.11465	2.99959	2.95191	3.02861	5.65571	1.96511	2.15885	2.40128
DPH5	4.15311	4.38996	5.78901	6.54453	3.11041	4.60566	5.32344	4.15513	4.19899	2.66931	4.08021	2.56861	2.31696	3.52414	2.39312	2.08736	2.93494	2.39907	2.46308	3.15594	4.21177	3.28358	4.42865	3.94369	3.98194	1.81694	2.48189	3.70693	2.01892	2.76972	3.18679	4.02021	2.89188	5.45055	4.84166	5.73636	6.1824	2.72755	4.22137	5.2367	2.13924	5.51465
DPM1	6.69655	4.10793	7.86957	7.31575	4.56082	4.11756	7.07982	5.91958	6.54651	4.37285	4.64963	7.15306	7.88087	7.12711	6.96609	5.42298	6.64425	4.33144	5.58836	7.00749	5.00363	4.74468	5.94184	6.2145	5.53396	7.57066	4.33145	5.45108	5.39285	4.80707	4.67281	6.83986	4.21107	6.94169	5.1835	7.75583	5.23061	5.4154	4.81049	5.61184	6.3115	5.57571
DPP3	2.29978	2.57585	4.05571	4.03704	2.18685	2.70241	3.97388	2.22199	2.86962	2.47814	3.60438	1.88041	1.25212	1.59161	2.09915	1.91027	2.09871	2.13706	1.62595	2.33835	2.11267	2.39611	3.48173	2.79816	2.47965	2.76459	1.6208	3.10113	3.62059	3.38699	2.24055	3.00598	2.65714	4.06876	3.06912	4.2114	4.31375	2.56427	3.72908	2.88511	2.22138	3.10912
DPY30	32.9491	33.0795	50.3743	47.7975	28.0651	34.7048	38.49	33.2413	38.7269	19.3579	38.976	17.5133	5.6255	29.5967	16.5682	22.8935	14.1992	36.3144	26.1433	29.7827	17.6388	11.2251	45.5318	34.364	34.3201	40.2702	35.6518	32.2791	31.8467	31.8805	28.7542	32.1004	30.7226	39.409	32.0238	51.1808	90.8086	19.7803	40.3244	36.613	16.9324	43.7539
DPYSL2	4.35129	19.1474	4.94153	11.281	3.84589	20.512	5.01055	4.65146	7.30432	3.41622	6.33707	2.51681	2.39958	2.87408	2.08347	2.66803	3.27604	3.23323	2.08943	6.39135	16.7881	5.36469	4.62554	5.94257	5.55805	5.27899	5.89431	5.71412	4.82109	4.5312	3.49678	6.07431	4.36119	4.71199	6.28594	6.02848	6.64788	3.49075	7.04206	5.68279	2.12927	4.6369
DPYSL3	0.271114	0.236588	0.441647	0.257696	0.422401	0.117524	0.516047	0.472812	1.06999	0.817917	0.633897	1.843	0.3567	1.65187	0.788715	0.93751	1.95263	1.53512	2.05059	0.0880972	0.270634	0.548865	0.207793	0.355575	0.267996	0.171488	0.146175	0.223722	0.117258	0.296629	0.432773	0.21585	0.497118	0.528368	0.515516	0.403203	0.429061	0.584064	0.71887	0.223003	0.806054	0.362726
DPYSL5	12.0223	13.233	7.85064	6.86275	17.292	14.2167	25.7351	49.3408	5.9401	2.82335	10.6208	1.93303	3.73654	3.4109	0.74923	2.61927	2.11134	2.49382	2.28735	8.48235	9.99116	10.8265	11.7213	10.4539	12.3331	8.3837	10.5963	11.4759	10.8574	13.7662	17.7635	7.4444	10.9839	25.5596	6.82004	5.25722	7.07193	2.96252	10.714	3.67297	1.03765	28.1202
DR1	9.80817	10.3997	13.9129	17.2443	3.84949	10.9107	12.0969	11.7585	15.3536	12.948	10.3886	13.7208	15.88	16.2234	14.896	15.8036	15.69	16.6431	14.0217	12.9107	9.77838	12.7197	10.5955	13.0721	13.6021	11.101	13.5551	10.5091	11.5912	12.4815	3.94401	12.6974	7.5373	12.3857	13.5158	16.3798	21.0194	13.2305	10.748	14.792	15.2235	14.1026
DRAP1	5.20616	7.51076	11.8535	11.125	13.3968	7.8798	7.52887	7.69011	5.85522	8.41589	5.50537	5.60136	12.6883	10.1947	6.63297	6.46634	9.16731	8.32569	7.9843	7.7389	5.35232	8.39466	8.56702	10.8576	7.84731	7.58635	6.27537	6.89688	4.49083	4.29488	13.7258	5.00367	5.05081	7.70863	7.51858	7.39901	6.16179	8.59951	5.69584	8.32155	6.77879	6.64515
DRG1	9.92481	11.1993	6.34027	5.32913	11.2896	12.3218	14.0361	13.2758	8.26608	5.7542	13.3417	5.3073	3.06185	5.8236	8.39428	6.79553	6.55231	5.54347	6.35247	13.7545	10.3249	13.916	11.8192	14.1347	12.0976	16.0014	12.0681	11.2779	10.2235	9.48505	11.5876	12.6193	10.2221	14.6293	10.9864	6.92051	5.34334	4.2888	13.8556	7.54881	8.57883	9.41525
DRG2	3.0287	3.66934	2.90308	2.78168	3.13778	3.84963	3.46106	2.35634	3.2653	1.48891	3.93474	2.01596	1.53634	1.62317	1.46241	1.60332	1.67073	1.54271	1.52732	3.23177	2.31441	1.67833	2.70209	2.86501	3.12104	4.07591	2.93736	3.92044	3.8309	4.2994	3.21483	4.26068	2.51971	3.5437	4.01775	2.1183	3.58346	1.76512	4.07087	1.90717	1.49456	1.9087
DSG2	4.03834	3.9203	3.45588	3.1208	3.85991	4.11292	4.7654	5.00703	6.65131	4.60496	4.42728	8.85189	3.54729	10.4517	4.68744	8.98453	4.00959	10.1245	4.80875	10.9712	9.16598	6.08113	3.55662	3.77321	5.22325	4.64451	11.2689	8.66475	9.19217	9.96615	3.95469	4.79774	9.85657	4.61449	4.81901	2.72403	4.51012	4.70543	4.38949	10.0697	4.7385	2.84336
DSP	0.88054	1.22004	1.02543	1.31553	0.756838	1.31735	0.81348	0.995874	1.25207	4.04491	0.801577	4.49209	4.96571	4.32096	4.42582	4.23885	5.37356	5.30046	4.87753	0.748302	1.15817	0.539622	0.561234	1.09836	0.929369	1.44817	0.75538	1.004	0.798789	1.05807	0.716445	1.37138	1.18462	0.817163	1.14584	1.18387	1.65134	4.11912	0.898898	0.963715	4.24061	1.08416
DSTN	14.8892	13.2796	22.3255	33.9391	16.8639	13.9321	11.3286	15.9552	23.5536	9.96711	12.2407	13.463	2.69876	6.15866	7.4889	8.58669	10.0236	12.5507	12.1681	18.3749	16.5269	15.9134	16.2539	18.4325	13.6021	15.7138	18.2525	17.3014	13.1794	13.7644	17.278	7.63291	12.8846	11.5991	16.5781	38.6822	23.5551	10.1846	12.6642	34.2529	7.44376	39.8064
DTYMK	5.73867	7.6335	12.0777	12.9509	15.0521	8.00856	7.6655	6.33039	8.56072	4.41688	6.93186	5.60651	5.27102	5.43165	4.54336	3.70815	5.50268	6.32745	5.10229	8.29684	14.2907	8.18543	7.57551	9.38997	8.78524	9.32405	8.11343	8.09919	8.07249	8.16473	14.6198	8.97777	4.54016	7.84852	5.60562	12.2901	8.72359	4.53943	6.09779	12.7467	4.64325	12.6518
DUS2L	0.368461	0.187339	0.482983	0.178022	0.327496	0.196544	0.411586	0.302633	0.458299	0.146057	0.326617	0.458967	1.1556	0.277083	0.185792	0.335471	0.28228	0.175339	0.330363	0.301576	0.421552	0.229634	0.107182	0.175475	0.423456	0.393238	0.172719	0.244067	0.165571	0.298558	0.36742	0.488086	0.437128	0.395874	0.267007	0.239168	0.195901	0.297965	0.317433	0.364183	0.299976	0.12398
DUS3L	1.11637	1.36883	1.29296	0.792437	0.923259	1.43609	1.76489	1.29806	1.28562	1.00959	1.49318	0.904994	0.690567	0.961983	0.76593	1.07287	1.39467	1.04325	1.13327	2.35066	1.77573	0.976515	1.20787	1.23488	1.24534	1.02445	1.07108	1.02185	1.52704	1.40308	0.94593	1.53337	2.05106	2.02384	1.98017	1.4375	0.828842	0.862524	1.3745	1.16045	0.782768	0.756617
DUSP3	4.99896	5.59244	5.20757	5.29455	3.01221	5.86722	9.51249	6.86586	9.75558	4.17794	6.35352	3.08813	8.34231	2.83583	3.48447	5.68522	4.67268	3.2968	2.32594	8.66618	5.98305	6.95309	6.7479	9.2604	5.2704	5.16658	13.6724	7.08553	6.67399	6.89026	3.08618	3.94055	4.32974	9.73961	8.09819	6.85553	7.87561	4.2691	6.57333	3.43163	3.99789	4.49598
DUSP9	0.601987	2.10559	0.841622	1.2602	1.03818	2.05057	0.932204	2.11952	1.34503	4.58848	1.67548	3.59571	3.94168	3.40128	3.19466	4.30766	3.15008	4.62762	4.45264	0.908743	1.1214	1.59786	1.49624	2.40609	1.43711	1.22944	0.665549	1.14785	0.986104	1.45194	1.06367	1.1976	1.52308	0.954462	1.92697	1.69295	1.60075	4.6886	1.73344	1.22963	3.2649	0.64587
DUT	159.299	97.6102	137.268	120.41	188.702	99.6028	124.615	158.132	180.598	81.04	135.848	85.4213	37.5199	74.024	60.4285	75.0046	95.8684	76.2199	95.9222	117.138	225.384	192.262	116.96	105.198	191.686	121.58	140.795	108.87	127.644	139.412	193.335	148.476	92.2297	127.192	151.579	204.931	133.588	84.3109	140.548	206.055	62.3889	164.719
DVL2	1.08187	0.691168	1.43489	1.73073	1.29448	0.725128	1.31836	0.613034	1.0375	0.693892	2.70295	1.02062	0.643546	1.02232	0.258007	0.875812	1.14015	0.915782	0.528177	0.794862	1.60083	1.66642	0.805258	0.780322	1.09899	0.614196	0.703542	0.803466	0.907163	0.837646	1.32627	1.76226	1.61731	1.34984	1.691	0.807225	1.07449	0.709031	2.94939	0.78243	0.263679	0.918491
DYNC1H1	12.0448	12.124	15.9285	16.4704	10.9253	12.9955	12.2735	13.3323	16.4293	7.20067	14.8034	6.75571	5.70779	7.46608	6.46389	6.25359	6.88993	7.16837	6.12567	11.5804	13.679	10.9853	11.4244	11.4099	13.5531	12.1064	12.154	11.6161	12.7115	12.5106	11.2135	13.8671	10.9453	12.3849	14.2574	15.3488	18.1597	7.55554	14.854	15.129	6.65508	14.921
DYNC1I2	10.263	9.92564	11.0459	12.1279	14.555	10.7224	13.0515	15.8026	13.5646	7.72877	13.1379	11.1474	0.33198	8.00651	7.51423	6.07271	10.6313	8.55652	7.08558	2.74281	12.167	9.12479	8.27303	8.61174	9.19283	4.43275	4.85661	10.4364	10.7484	10.5639	13.4939	15.7464	12.6543	13.3631	13.8002	15.8484	14.4868	7.8974	13.5925	6.71757	7.67942	12.9933
DYNC1LI1	9.45601	13.8174	10.3401	10.4434	9.64339	14.159	15.3312	14.2786	18.4567	8.31228	16.0024	7.13797	8.85408	8.85638	6.63856	8.91095	9.43879	8.28744	8.63231	10.9764	12.1447	11.1617	12.4695	11.7251	11.1742	12.4447	13.4166	11.8484	12.8296	13.0822	9.88019	9.47227	10.8531	14.446	18.3016	11.1553	12.2475	8.49364	16.0304	12.4898	6.06171	13.2724
DYNC2H1	0.10949	0.113835	0.22025	0.151779	0.0504576	0.119428	0.0630605	0.0921487	0.162416	0.144064	0.181671	0.0797356	0.0443987	0.0690401	0.0529896	0.0373775	0.102414	0.0353534	0.040834	0.109894	0.0695143	0.0832041	0.0842684	0.0716399	0.191503	0.055216	0.136489	0.0770614	0.0543177	0.192625	0.0516967	0.242668	0.0771721	0.0912974	0.13126	0.115803	0.178203	0.0827308	0.230057	0.0907416	0.0217219	0.0648318
DYNLL1	35.0681	26.2078	15.2647	11.1673	36.7677	27.4955	56.6916	42.312	17.5736	60.7344	66.3383	49.7143	26.5571	42.3342	16.5276	51.5242	46.8246	53.8074	56.1692	36.8408	40.8741	31.5094	47.6925	40.127	44.3771	40.6493	42.1692	46.3974	36.6547	40.4616	37.6705	44.3802	38.4401	58.0452	53.9798	12.797	15.515	62.0595	68.3192	15.3092	16.8909	37.549
DYNLRB1	26.6311	27.5248	32.9005	26.4259	19.4382	28.8772	21.2325	21.18	29.7997	19.2406	25.3008	16.2363	12.8092	21.4256	19.9246	21.9911	25.5905	16.8357	20.5581	20.037	25.5787	36.1161	25.0924	17.5876	20.5583	20.3631	12.8069	22.0856	21.8574	25.7807	19.9155	30.0757	28.8974	20.0841	21.1301	35.9721	31.4883	19.6604	26.1761	17.0075	21.1403	27.8311
DYNLT1	6.41143	13.0872	14.5902	14.5992	6.98111	13.7302	11.6949	4.60136	10.8117	12.6976	10.4411	12.7896	11.2187	8.75569	8.18058	12.5036	5.32463	9.37015	9.75571	8.20268	11.9857	9.62133	11.6932	10.4222	9.83435	8.71153	2.96731	11.995	12.8731	12.5657	7.15254	6.62027	7.15908	11.9741	8.82749	13.9883	23.4504	12.9746	10.8024	17.3322	8.36042	13.7412
EBNA1BP2	17.8188	17.7133	12.8645	12.2708	15.3946	20.5458	19.6076	17.432	17.9972	28.171	21.7726	33.1184	26.3882	29.7184	26.6582	31.3969	30.3904	34.0335	34.6329	17.3536	21.0173	20.3706	15.0351	12.9491	13.3393	15.4069	18.8061	17.8226	16.6772	16.1768	15.1859	21.3316	18.8563	20.0758	20.832	12.0917	10.3238	28.7856	22.5258	9.77006	27.2443	9.69257
EBP	11.6273	17.5699	18.4907	19.1147	16.2118	18.4332	19.6295	25.3531	20.5305	30.1431	19.6421	18.2923	22.9146	48.4125	27.0113	46.7073	22.4961	33.8256	18.7299	19.7194	12.4729	24.2014	7.07521	24.3774	11.4673	17.1391	22.1668	14.9913	13.2072	14.3696	16.6098	13.4664	17.1972	20.0982	4.68522	15.1467	13.5027	31.1014	20.3216	11.6879	27.6051	5.21809
ECH1	6.64215	6.40258	21.5647	14.5708	5.71332	6.71716	7.76688	7.70073	12.6978	22.374	7.6532	20.8688	24.9428	23.8775	29.7876	23.5768	26.4381	23.8555	19.7048	7.58067	5.63274	7.64267	7.45115	7.40387	7.74618	7.63419	8.71808	5.63479	5.89629	6.2665	5.85361	7.41887	5.87347	7.95233	8.16635	20.3859	25.0185	22.8622	8.32975	16.3691	30.4425	17.9958
ECHDC1	5.86971	2.69775	6.34914	6.74433	3.12795	2.8303	3.81569	3.37465	7.2915	4.62273	5.15387	4.87354	1.13404	4.4575	4.14171	3.15061	3.5023	5.39254	2.20462	5.63503	4.3334	5.90211	4.41048	7.4139	5.83785	5.12083	5.80031	4.53099	4.11151	4.2811	3.20476	4.70254	5.33967	3.9068	5.9028	5.03918	6.10923	4.23293	5.33218	6.31785	4.23277	2.86613
ECHS1	29.892	38.6031	36.5963	38.6644	22.2374	40.4998	29.4524	28.5167	63.4476	82.576	30.2414	74.2342	89.0706	69.7855	76.6007	79.6665	82.1317	78.972	78.1656	34.8737	21.8559	27.7803	22.2114	26.3987	28.7912	23.5462	19.087	35.7484	39.6197	41.0814	22.7834	38.5941	24.637	25.3207	26.0139	44.2017	41.7622	84.3777	30.2814	37.4616	78.2847	47.9733
ECI1	16.5632	11.2354	16.8248	18.3608	10.8128	11.7875	11.1122	9.56066	10.4191	21.1307	14.7129	14.7777	19.7191	18.3823	24.1571	21.8496	22.575	14.4496	21.7403	14.3415	16.694	16.0513	10.8856	10.0213	13.7914	12.4227	10.6136	9.18705	10.6487	11.0771	11.0784	9.36539	12.919	11.3775	15.1781	16.6283	20.5764	21.5918	15.4314	14.4116	24.6881	27.9142
ECI2	11.1127	11.5009	16.6674	17.6723	8.71084	12.0659	11.6139	11.7307	15.9315	19.6464	15.8443	18.3388	21.0155	18.5085	17.2579	17.4685	17.3679	19.6158	18.273	13.5008	7.30214	9.929	12.4844	12.0825	13.8739	13.0873	11.1928	12.2474	9.19158	12.9921	8.92474	11.6881	13.4269	11.8912	13.7423	16.9959	17.5558	19.5399	16.3924	15.3536	17.6373	14.8089
ECSIT	1.06001	0.810806	1.59018	1.62645	1.06966	0.850644	1.85736	1.63466	0.452325	6.22295	2.05944	6.60481	4.79915	8.68205	7.3264	6.70197	6.74811	6.94647	8.10471	0.965474	1.64236	1.17258	1.41881	1.49654	1.14272	1.23535	0.154425	0.407493	0.748028	0.908128	1.09593	1.83025	1.92574	1.9017	2.47845	2.64649	2.59387	6.83358	2.13069	2.36727	7.48746	1.64313
EDC3	3.97178	4.36654	3.83723	4.17036	3.55907	4.63838	4.64651	2.95996	5.1752	2.646	4.57288	4.21274	4.9124	3.77309	4.20476	3.98017	3.52195	3.62283	3.16037	4.21319	2.83718	4.01037	4.35966	2.40451	2.89187	4.63353	5.00278	4.53763	4.94343	4.33777	3.46221	3.83219	4.01941	4.49194	3.87691	3.95623	4.55685	2.2649	4.66352	3.74705	4.2972	2.80597
EDC4	8.51116	11.9391	6.72304	5.94405	7.6411	12.593	8.7815	10.189	9.09122	7.66474	9.93619	7.16061	8.6751	7.34209	8.51216	7.02121	7.86711	7.05742	7.37928	10.02	9.91905	9.93868	6.39552	10.3173	8.44297	7.72334	10.6402	10.2354	8.8212	9.69599	7.80646	11.3645	8.75467	8.99117	10.6967	6.74714	7.44319	7.59744	9.77653	6.1349	8.78894	6.07895
EDF1	16.3937	19.6732	8.6505	10.5056	18.1893	22.933	20.3216	31.7359	29.958	25.6002	34.6928	21.4642	17.5519	26.7668	16.8456	35.2912	19.7165	27.0182	17.8634	26.7006	22.423	38.2083	28.007	24.114	41.6757	19.6023	30.0385	28.248	40.6445	40.5443	18.636	23.2584	27.5504	20.8068	27.6173	10.9551	15.4929	26.1588	36.6649	16.2	17.2159	18.4222
EEA1	2.23391	1.61944	1.23853	1.46108	5.50837	1.96895	2.01887	2.28036	2.93614	1.047	2.28704	1.32398	0.711446	1.21146	0.792695	0.860044	1.04932	1.02342	0.999393	1.75145	1.63699	2.40479	2.39111	1.8379	2.28616	1.81386	2.50638	1.92938	1.67418	1.89489	5.56245	2.26131	1.49946	2.006	2.30874	2.02512	1.44813	1.01566	2.28957	1.95254	0.771058	1.15679
EED	2.09934	0.690917	2.99401	3.92407	3.34378	0.832815	1.74082	1.73738	1.19829	1.34869	1.8498	2.43558	1.45283	1.7201	1.48138	1.34764	2.25316	2.02413	1.36358	1.2466	2.08563	0.83461	1.24043	1.03045	0.986887	1.57578	1.40607	1.33443	1.10407	1.10917	3.20108	2.76818	1.7971	1.36818	1.45176	3.98507	3.3235	1.37811	1.9138	3.65974	1.51394	5.17735
EEF1A1	491.457	562.817	367.685	421.678	414.612	587.888	576.657	481.415	421.433	383.503	512.394	391.9	623.678	396.238	417.812	385.257	408.109	248.987	395.425	584.167	525.904	524.672	528.217	598.169	442.702	806.711	388.446	518.405	545.044	563.743	424.854	380.607	766.784	584.468	575.869	528.998	553.498	374.689	514.063	571.316	405.728	525.449
EEF1A2	20.7778	20.6185	26.6011	25.8265	14.2514	21.6316	19.4472	23.555	36.1543	29.7164	24.0005	25.9791	34.7742	33.5116	35.7658	29.7458	26.7435	29.9296	26.2828	16.7982	15.7643	18.9573	10.7148	19.9927	22.7843	17.6165	23.8074	13.1299	18.8475	21.1409	14.6014	22.6527	19.1471	19.9115	23.513	22.398	31.6129	30.4795	25.1091	32.7926	36.7156	17.985
EEF1B2	126.182	147.173	109.377	97.779	102.499	153.627	116.625	132.218	151.463	139.178	129.601	124.074	112.902	137.535	139.102	126.718	112.871	136.991	120.409	131.397	127.159	185.869	131.638	123.464	166.628	140.059	138.866	143.126	132.628	141.564	104.416	119.929	115.761	119.409	139.888	125.822	147.931	142.215	134.085	142.303	137.712	88.5881
EEF1D	2773.54	4538.98	3618.12	3488.43	1547.74	1570.5	1261.72	1235.37	1327.23	1565.24	1370.11	1311.9	1699.79	1766.86	1488.56	1688.35	1638.23	1465.4	1246.41	1204.09	776.975	1287.42	1612.6	1217.97	1205.16	1118.76	1254.75	1441.1	1234.77	1364.4	1585.75	1381.4	1360.57	1247.22	1341.65	1073.54	1176.77	1595.85	1417.51	1286.78	1499.82	1079.56
EEF1E1	29.4079	26.6954	23.559	24.1497	20.1451	25.8644	21.3565	23.9986	26.9619	17.1311	11.1593	12.3137	18.7688	13.6092	24.6757	15.2125	15.5906	16.5978	12.399	33.4257	18.9767	31.511	24.1736	27.8537	18.0901	27.3426	24.1691	20.7229	19.3517	23.4096	20.6398	26.7467	18.6201	20.1555	19.59	25.4857	22.0057	17.5049	11.5454	18.7458	25.2182	16.5659
EEF1G	92.7331	102.391	146.145	161.415	99.0801	126.883	127.541	133.18	115.34	107.672	128.697	79.5972	122.568	110.536	75.1193	106.187	105.381	96.6793	100.192	122.306	112.444	115.765	133.287	119.628	119.417	124.115	132.477	143.645	121.784	122.133	101.513	102.779	100.186	130.586	127.973	168.886	186.6	110.021	108.344	141.87	76.7707	136.635
EEF2	191.41	202.624	194.923	214.654	210.155	213.808	190.298	183.074	206.725	196.119	157	190.392	172.505	187.212	189.388	191.513	172.297	183.66	186.548	191.304	228.301	182.816	168.533	178.185	189.249	175.232	180.44	195.14	203.103	205.053	214.954	198.928	192.645	192.635	165.16	231.478	188.319	200.611	162.327	244.78	189.08	216.245
EEFSEC	0.603467	0.818681	2.01656	1.23361	1.37042	0.728563	0.899221	1.01612	0.764694	1.03794	0.775255	1.14831	0.699028	1.12091	0.909484	0.966377	1.24283	1.16995	1.34449	0.789056	1.55891	0.465207	0.747403	0.485661	0.799081	1.11838	1.00849	0.603714	0.663804	0.911139	1.40407	1.30191	0.696801	0.920691	0.94662	1.92838	1.33286	1.24894	0.802076	1.01822	0.929478	1.07765
EFHD2	4.81764	5.19018	8.32393	7.37869	5.89758	5.4452	6.73459	6.50261	9.31158	8.94471	10.3557	12.2596	4.9735	9.58527	10.7013	10.7603	8.36785	13.942	7.75807	8.37113	7.48018	8.64693	11.7485	7.61859	8.46474	8.25063	7.91414	8.17624	5.26972	8.92505	6.0424	8.34572	8.01176	7.07959	10.421	7.42076	6.12664	9.13987	8.5196	7.55237	10.9366	6.88317
EFTUD1	1.24761	1.40468	1.2522	1.0269	1.3073	1.4737	1.28165	1.64672	2.13026	0.484505	1.47489	0.376062	0.600316	0.347447	0.213687	0.263625	0.278176	0.200589	0.146156	1.32227	1.58625	1.00346	1.26394	1.37485	0.662416	0.701278	1.11212	1.18665	1.11749	1.03369	1.3394	0.922814	0.535	1.31225	1.67088	0.721782	0.921133	0.528028	1.52592	1.16746	0.218384	0.581121
EFTUD2	24.3229	26.6727	30.5075	31.2856	20.5072	27.7288	24.2269	25.5269	34.6191	28.4789	25.2261	30.2325	29.6267	31.0146	30.1078	27.9442	28.9004	27.7413	30.7829	27.6659	21.9997	25.5829	22.4134	25.0479	27.7271	23.5135	30.9219	23.1845	23.9029	21.617	21.0761	25.8867	21.0815	23.2355	26.1614	32.4767	34.6676	30.5346	25.8534	30.9609	30.7193	25.3967
EGFR	0.0795641	0.201692	0.0910722	0.15808	0.0229345	0.168772	0.244279	0.251912	0.43672	0.512493	0.183601	0.335987	0.300738	0.322552	0.195989	0.405537	0.233358	0.374251	0.134653	0.117567	0.203489	0.173506	0.162721	0.111857	0.195265	0.0887205	0.192396	0.196202	0.228464	0.177958	0.0234977	0.052291	0.158384	0.250112	0.205012	0.0537398	0.12361	0.523675	0.189953	0.0960401	0.200298	0.109662
EGLN1	2.76809	3.63038	1.59805	2.19572	4.55865	3.80875	4.0332	3.93281	3.3967	2.50563	5.07155	2.89643	0.406155	1.98521	1.86033	2.51326	2.34107	2.17736	2.68041	2.54009	3.98796	1.70119	2.31067	2.54608	2.06678	3.24797	3.2589	3.39435	4.39431	4.23781	5.07197	2.56116	3.34652	4.1295	4.86778	1.47254	1.43523	2.5603	5.24701	0.870403	1.90123	1.66535
EHD1	4.47479	3.02974	2.90474	1.38999	2.30972	3.1786	3.55296	1.94536	2.49598	1.58856	2.22269	2.32794	1.17151	2.41315	1.95847	2.39221	3.00739	3.44002	2.22004	2.15563	2.99284	2.9599	2.6925	2.53035	4.86642	2.03171	2.27658	2.32623	2.42524	3.07235	2.5222	4.10067	1.85537	3.73164	3.13654	1.46935	2.68963	1.71946	2.4933	2.03518	2.00152	1.73446
EHD4	2.6787	3.45399	2.54812	2.12334	2.83949	3.37745	3.92542	3.95178	3.06403	1.8165	5.37774	1.65708	0.927313	2.31854	2.06899	1.982	2.61003	1.92695	2.29705	2.98736	2.84832	3.25388	3.38935	3.51937	3.94368	2.83544	3.46045	4.03488	2.04474	1.67657	2.5914	4.58962	2.14126	3.97102	3.18005	1.73263	2.58572	1.48839	4.58575	1.91617	1.60662	1.41016
EHMT1	0.704401	0.434634	0.688869	0.459478	0.494509	0.532408	0.272992	0.368249	0.482417	0.590853	0.608567	0.804775	0.358173	0.866702	0.732475	0.253994	0.887057	0.711545	0.923603	0.325206	0.6766	0.263721	0.0822608	0.156292	0.404738	0.525337	0.634808	0.378721	0.28558	0.552665	0.506652	0.794078	0.741364	0.27951	0.365832	0.82003	0.531502	0.603745	0.629622	0.726153	0.832198	0.292674
EHMT2	1.27711	1.27765	0.560123	0.857526	1.10062	1.34042	1.48044	1.46876	1.05611	1.08665	2.23844	0.705813	0.422513	1.23581	1.96482	1.31222	1.33516	1.29633	1.33796	1.1977	1.08748	0.587558	0.944562	1.43695	0.574046	1.69172	1.45941	1.33233	1.53631	1.63653	1.12765	1.99521	0.938756	1.62905	2.16832	0.788297	0.872547	1.1527	2.31589	0.457584	2.00802	0.780997
EIF1AD	3.96081	4.44123	6.4929	6.3903	6.83471	4.65945	3.78149	4.98131	7.98181	3.32074	4.32351	5.02487	4.1695	3.25235	1.83851	3.06288	0.542084	7.118	2.71117	3.48612	6.23249	5.31914	6.31862	4.86939	4.89437	5.96367	5.05872	4.08005	2.54122	3.45566	7.00254	5.53825	4.07732	3.87178	3.82592	6.06898	3.38819	1.65594	4.47309	3.18951	1.87893	2.83334
EIF1AX	27.3035	34.2184	46.6767	32.9801	14.7567	35.8997	25.1719	23.0481	10.0274	41.111	29.6719	28.677	17.5717	40.8982	21.27	32.66	30.5624	35.2884	26.2771	15.9154	24.0991	23.3254	29.7033	11.3161	29.4031	23.7514	13.9844	29.9637	27.1976	26.7252	15.1191	26.5062	40.5774	25.7729	27.0178	27.7617	55.9966	42.008	30.6985	46.091	21.7376	79.2957
EIF2A	5.357	6.51372	5.60981	5.27741	5.46151	6.83377	4.21473	4.48708	5.22906	5.66642	5.40578	8.701	5.68577	10.5524	7.49943	10.1012	8.67801	9.66474	7.07889	5.97178	5.42533	4.39663	5.67174	5.48974	5.92905	4.28845	5.38987	5.06296	4.3536	4.57272	6.19524	8.51474	6.44703	4.31536	6.03627	5.6348	5.83086	5.72029	5.5928	5.90434	7.6643	4.56084
EIF2AK2	4.30091	5.53328	10.3253	9.20309	5.9077	5.80516	4.23694	5.03664	9.02429	4.26939	6.37756	5.81789	4.68475	3.6059	3.56561	4.46186	3.30918	3.57443	4.17477	4.9898	7.77478	4.8548	2.1895	4.17865	4.00951	3.80455	4.4795	4.59039	3.72624	4.48378	6.05277	4.9719	3.09968	4.3381	5.51987	10.835	10.5764	3.6247	6.59821	11.3943	3.644	9.00948
EIF2B1	7.20475	8.24537	7.63116	6.65795	6.51049	7.72583	7.02447	7.85971	8.76394	4.3022	13.2057	3.97351	5.32053	4.80007	4.2972	4.22736	4.57403	3.89179	4.06447	7.69581	6.57985	9.39525	6.36388	5.789	10.3288	8.53637	6.08587	9.71124	8.7922	8.83237	6.67036	8.86337	6.04792	7.19219	7.90751	6.75024	8.96812	4.39606	13.6625	5.47104	4.39167	6.02918
EIF2B2	3.93297	4.65598	1.65585	0.994466	2.71145	4.88475	4.71815	3.30575	1.7354	5.56123	5.53973	5.98394	2.66399	5.91835	5.29348	4.80391	4.97162	1.58818	4.17665	3.79097	7.65265	4.50491	4.33088	2.50656	3.22371	4.41262	2.68137	3.20077	4.36949	4.30216	3.01221	3.30543	3.84864	4.58387	4.83186	5.09005	2.31341	5.68257	5.73139	1.40179	5.40985	1.34422
EIF2B3	2.27694	1.69066	2.6452	3.02628	2.19727	1.77373	2.63769	2.12526	2.22208	2.58153	2.84374	2.96899	1.41743	2.46966	1.27107	1.85699	2.3769	1.77571	1.61575	1.90339	2.23947	2.06859	2.53801	2.53035	3.29134	3.28509	1.34856	1.45675	1.8119	1.79314	2.25123	3.38401	2.63174	2.70067	1.76179	3.32475	4.16774	2.63786	2.94212	3.07162	1.51686	3.54569
EIF2B4	35.2599	45.4998	17.9098	23.3952	23.0566	47.7355	47.2668	44.2493	38.7002	21.2614	56.604	15.0664	26.7482	27.7414	19.2924	19.1034	25.427	28.2593	19.4946	42.7354	30.0755	36.6338	43.6193	40.4339	32.388	35.0971	45.6346	40.1628	40.2875	38.8187	24.6495	34.1395	26.4629	48.3953	47.5964	22.5919	24.9359	21.1829	58.5623	20.0901	21.8967	19.0823
EIF2B5	1.62908	3.92855	2.41796	1.70514	2.76153	3.89614	2.18395	2.28246	2.30239	1.04628	2.82406	1.12329	1.56753	1.67915	2.7145	1.81599	1.64058	1.44056	1.80821	2.30281	1.57379	2.98409	2.62232	3.08031	2.51546	2.61897	3.10821	2.48906	2.94795	2.72525	1.58172	1.38859	2.40733	2.23609	2.77763	1.59703	1.48659	1.06911	2.92176	1.60944	2.77418	1.42688
EIF2D	2.32075	4.25707	2.07365	2.84361	3.46897	4.52542	4.88518	5.11262	2.94071	2.16545	4.18019	3.21306	1.43037	2.66353	3.1735	2.34571	2.56939	1.91586	2.57566	2.33527	3.47966	2.33888	3.06103	3.38409	1.65198	3.45842	3.09992	2.96771	2.93464	4.26635	3.55415	4.20814	3.35257	5.00182	5.80714	3.46963	2.98166	2.2127	4.32481	2.65488	3.24327	2.36127
EIF2S1	30.2331	22.4015	30.9831	22.1816	27.1115	23.5022	18.6092	8.82522	9.50909	24.303	19.9863	33.715	21.8848	37.2087	31.1517	33.1678	41.1329	33.7504	38.9837	17.3229	22.4504	22.4645	17.9977	10.6934	24.5517	19.9741	10.4736	15.246	14.3346	13.4989	27.9263	36.0558	26.7541	19.1531	21.0974	28.3578	19.3973	24.8332	21.7959	23.3369	31.7536	25.9694
EIF2S2	13.6464	9.48394	7.98494	8.33704	12.9246	10.3911	28.7944	21.1893	23.1929	18.0736	26.8131	13.468	4.95032	11.7066	2.65014	13.2467	16.4603	13.8955	11.9226	11.8715	10.0787	14.6974	16.3642	11.6295	12.1741	14.2538	20.9405	15.3999	13.1347	13.0139	13.3226	12.6123	16.0295	29.4819	27.0705	7.62442	10.9313	17.7445	27.7407	9.8865	2.55891	12.6843
EIF2S3	46.4906	44.9023	49.1343	40.2789	40.267	47.1085	32.2945	35.1609	41.7295	40.2447	41.7962	42.2142	45.3789	48.6139	42.3546	50.3533	44.0064	45.0743	41.8995	46.9222	33.7687	52.529	40.5776	44.0733	52.4554	35.9174	43.1317	36.741	36.6011	36.5498	41.2558	50.4771	52.9683	33.0655	40.3429	47.1083	44.9999	41.1228	43.1623	33.9015	43.8539	36.2835
EIF3A	19.8751	24.3459	16.1539	17.2873	20.0492	25.4657	23.3071	22.8204	22.4657	15.2129	24.6288	13.4863	16.9012	15.2834	13.1613	13.3721	16.1564	13.131	14.6988	21.983	25.8997	19.7699	17.895	20.1028	20.5532	21.1837	18.3942	17.7844	19.9191	17.9857	20.4831	23.3128	19.1067	23.384	23.474	17.5529	20.0298	15.3015	25.4226	19.7701	13.435	19.6019
EIF3B	20.4504	19.6601	23.843	24.9804	19.2426	20.6912	25.8923	25.4417	25.5826	13.6732	26.1291	16.159	7.61745	13.8226	11.7447	13.778	14.1929	14.9113	14.264	22.1313	23.9857	25.1024	24.6061	22.5449	24.6922	25.167	26.5462	24.4219	22.8901	24.1455	19.9324	22.055	22.7678	25.1282	25.6273	22.6946	23.9	13.6422	27.1987	26.1207	12.0028	24.5051
EIF3C	15.2048	8.5151	11.6677	11.3532	15.3429	8.93348	15.0402	15.2139	16.1347	10.2707	17.2154	11.7705	9.66238	9.71226	7.76215	9.68075	11.3376	10.2526	10.3072	10.2303	13.8796	11.8529	13.5912	11.6421	13.7103	14.6247	15.0193	11.9906	11.6434	12.9179	15.9393	15.7236	14.209	14.8301	19.0927	9.61186	10.0336	10.4948	18.2195	11.54	7.93279	10.5092
EIF3D	18.1854	15.9231	17.7814	17.0276	16.5191	16.7055	18.7535	17.712	17.625	13.2106	21.9137	13.1134	9.25293	9.5492	12.7282	11.2616	11.6241	14.3865	12.7359	13.35	17.6429	17.4057	17.0687	14.6383	17.7423	18.475	20.7785	15.0114	16.4324	16.7545	16.9247	18.5261	21.1538	19.2012	17.0301	21.7172	20.324	14.1347	21.0319	18.044	13.008	17.2822
EIF3E	9.76034	7.01875	21.0897	20.6017	14.552	6.46415	9.29935	8.34129	9.54501	7.42803	8.32329	7.37249	5.30298	7.81039	8.51545	7.43223	7.56729	9.55698	8.84687	7.50848	12.5792	8.11285	9.61726	7.53148	9.41401	8.97609	6.91958	10.1542	7.57898	7.45105	14.9094	11.6792	7.47665	9.74459	9.147	21.6981	18.076	7.59009	8.61125	15.6795	8.70265	19.2126
EIF3F	17.859	17.8388	30.9494	34.9719	16.9531	18.7153	28.7668	29.6502	30.9031	20.3458	31.7227	18.3067	20.0867	21.9185	15.6098	18.5472	23.4376	15.2919	16.8934	20.9785	16.2119	22.6464	24.6414	23.994	27.1848	24.1603	29.2606	22.3608	22.0599	19.7025	17.3694	24.621	19.1601	29.4536	27.6573	24.1461	27.1476	20.7897	30.6775	23.4414	15.219	27.4554
EIF3G	27.0291	17.9045	14.8269	11.4455	14.1772	23.3305	32.1437	30.8874	37.2782	25.9902	31.5423	23.3649	14.5802	24.8867	18.6998	23.3577	27.116	27.2394	27.4291	34.5813	28.0113	30.7302	33.8262	30.6871	31.0571	25.1095	32.0427	23.3932	23.6805	23.3998	14.5254	17.6751	26.7957	32.4399	32.244	10.0332	15.3552	26.7006	32.6336	12.0516	19.1109	12.1378
EIF3H	11.5499	10.0779	20.236	16.5434	15.5356	10.5731	12.8659	16.0514	10.1196	10.8197	12.8861	13.363	10.1972	11.3339	12.4881	8.61014	12.2933	9.34975	10.7673	9.29141	13.7185	9.37906	11.7098	10.7895	13.2053	12.7924	11.0269	11.235	11.7133	12.4834	15.1237	11.8306	11.3359	12.8885	14.0825	18.8142	20.205	10.8705	13.1054	14.3994	10.9514	18.4638
EIF3I	18.8038	21.3833	30.763	27.7645	33.3583	22.434	20.3929	23.0186	17.0292	13.6991	20.171	25.3517	15.8412	16.0521	24.327	18.6337	14.8093	21.4528	19.345	21.187	30.7345	23.6508	20.1399	17.9699	25.4586	16.0715	22.568	20.313	18.1667	22.7327	31.5914	23.3553	24.0851	20.4766	24.5064	31.3337	33.9392	13.998	20.8689	29.5562	24.4764	36.8995
EIF3J	12.1546	16.7549	7.85123	7.58648	16.6743	17.5781	11.519	8.86065	12.5003	13.2588	11.8446	14.2256	5.56904	13.1072	9.37039	11.5753	12.961	13.6538	15.3025	8.41967	13.9788	12.0677	15.4573	9.92302	11.8445	9.97997	9.5936	15.7797	13.686	13.3768	17.0837	17.7839	15.0979	11.7941	13.1692	8.20002	8.39564	13.5481	12.2544	7.22105	9.57639	9.6745
EIF3K	18.154	13.3238	28.8232	28.9372	17.0738	13.9785	25.6476	23.3248	35.5283	18.5377	28.321	18.9128	18.8781	18.1313	14.3247	16.7448	16.3159	14.2341	10.6939	15.3124	14.4457	24.5301	23.8421	25.6476	14.098	13.2468	17.7042	23.6172	22.3578	18.8068	17.4063	27.3642	15.963	26.2599	25.7916	21.4897	28.2562	18.9421	29.3008	23.6349	14.6396	18.8721
EIF3L	11.2078	12.688	16.4	14.8067	16.5071	13.3115	13.118	15.1523	14.1824	7.67409	13.4353	7.04995	6.18761	8.33564	6.81992	8.44519	7.27166	8.88746	8.19829	16.1533	15.028	14.6642	16.2918	15.8239	14.1985	14.1963	14.9343	16.3079	13.6123	12.9201	17.7588	16.0215	12.1084	12.8537	12.5835	17.9615	17.104	8.49364	13.9002	12.6855	6.83874	18.6516
EIF3M	24.8493	29.6006	25.0463	26.2383	19.0327	31.055	20.5469	22.4932	29.9343	13.053	21.5005	14.0653	10.344	11.4623	11.9694	10.7562	11.7867	10.1232	17.0582	29.3364	18.2698	31.5127	23.492	23.1348	28.3609	24.2709	24.478	19.1325	20.2527	21.6859	19.0284	28.2776	24.1801	21.0375	27.1348	24.1143	33.7099	13.3378	22.2443	16.7694	12.274	19.2659
EIF4A1	156.831	133.812	131.432	122.862	121.037	140.111	138.733	117.687	83.4198	125.918	151.28	156.001	114.426	137.798	148.872	141.597	150.287	145.274	156.558	101.729	125.762	122.615	117.127	99.9695	133.741	132.13	90.4075	129.46	131.563	129.87	119.923	176.028	150.124	133.333	155.879	119.598	118.211	124.254	143.722	122.751	152.145	107.296
EIF4A2	3.73008	7.56012	6.89638	6.3654	5.2738	7.93158	7.14141	9.15415	10.242	4.17384	8.73459	3.30901	4.15526	3.43149	3.25815	5.10908	4.36568	2.6232	2.99165	3.29207	4.58223	6.54531	7.41059	8.27708	9.106	8.85819	7.68509	6.64902	6.11534	6.72399	4.70215	6.96722	5.63078	7.31192	7.10436	6.97538	3.11809	4.26491	9.03677	7.3732	3.32978	5.758
EIF4A3	42.6935	57.2641	111.287	111.942	65.4302	59.7643	56.9023	57.606	61.8658	72.2225	72.9759	80.2888	78.8633	69.8997	90.6973	72.1755	79.7326	80.7	79.0524	44.1857	74.8575	46.7944	53.1246	53.9536	53.8827	56.8839	26.4784	62.9601	54.1748	56.3133	65.4079	84.0767	61.38	58.2609	67.9096	78.9325	93.8622	73.7983	74.9835	95.0291	92.3573	99.7621
EIF4B	6.94472	8.18024	5.51977	5.09705	16.6428	8.58217	8.33335	5.39474	2.04432	8.41804	4.49328	9.01851	8.11862	6.23381	7.78726	9.15515	6.71693	10.5154	9.84708	5.06563	16.7831	7.43528	6.23683	4.33516	6.33329	5.03927	3.05622	8.0859	8.27029	7.93078	15.0522	7.49853	7.09428	8.53232	4.71187	4.73458	5.38687	8.60171	4.64873	5.12682	7.95846	11.361
EIF4E	10.1306	5.00327	19.2906	16.8593	13.7559	5.2491	17.1319	10.7836	13.0896	10.3779	9.27623	7.83461	3.56931	5.75086	4.0632	7.78123	10.8341	14.3004	6.62145	10.9121	11.0864	9.33118	9.83165	6.98743	10.3157	10.3734	7.55549	8.76648	5.48818	6.13762	11.9255	9.2224	8.96187	14.8426	12.5498	14.6644	4.70782	8.97298	8.92483	17.5457	3.51367	13.4422
EIF4E2	0.804021	1.96075	3.09713	2.01314	6.18522	2.05709	1.42655	1.96206	0.595569	1.70138	0.925471	1.37145	0.141647	0.257418	0.488876	0.552058	1.23249	1.27057	0.886564	0.346723	1.04312	0.126995	0.146309	2.01579	0.638675	0.996664	0.661047	0.158993	0.145004	0.130834	6.3371	0.688953	0.321681	1.46061	1.10381	2.9277	1.72539	0.147508	0.95749	0.99946	0.499624	1.50474
EIF4G1	302.487	327.216	248.215	228.782	275.849	229.856	234.43	268.744	247.25	247.647	245.716	237.185	216.722	228.387	193.384	246.068	231.115	208.547	211.395	243.157	290.096	281.444	252.824	229.687	267.482	245.553	254.202	225.333	229.279	235.401	286.075	256.415	244.076	232.498	277.214	170.746	164.164	239.507	251.608	162.442	198.025	159.149
EIF4G2	7.52966	6.20527	6.34973	6.01552	7.4285	6.61184	10.8634	8.65233	7.87171	6.2867	10.126	6.49164	5.48129	6.52844	6.414	5.88656	7.73618	7.33161	6.67252	6.82533	8.94196	6.91338	8.59815	6.76327	8.54448	8.76172	7.49635	8.04529	7.78294	8.66787	7.76652	8.10653	6.76021	11.1228	11.0791	4.84233	6.89076	6.51282	10.1163	6.29438	6.555	4.53672
EIF4G3	0.207964	0.201859	0.249103	0.218189	0.213228	0.20685	0.285569	0.209	0.273993	0.121277	0.124223	0.185916	0.057414	0.188677	0.0557254	0.421135	0.219941	0.158422	0.151843	0.226014	0.216078	0.0955526	0.127165	0.138901	0.259069	0.244863	0.270699	0.29362	0.224412	0.234608	0.196006	0.251683	0.164413	0.292387	0.295166	0.213523	0.210459	0.123923	0.193567	0.105991	0.0569505	0.253019
EIF4H	61.3856	58.5034	70.8096	70.7907	21.3565	30.3441	34.22	29.8239	55.6997	15.2136	29.9434	26.638	17.4823	24.7272	25.5716	24.2075	27.3362	26.5356	26.2853	73.9222	43.0474	73.053	78.8868	84.5601	62.2611	54.9258	84.3271	79.8209	79.303	80.1322	43.7619	67.2526	63.693	64.9528	73.3391	71.28	82.9007	30.131	61.9586	60.2557	51.2791	55.5087
EIF5	12.5594	10.5349	16.0628	14.6008	15.1488	11.0525	19.0866	17.1663	14.1522	13.9668	18.4974	15.1279	14.2523	14.5725	15.8664	19.1448	15.9481	11.9481	13.7696	15.1977	16.4671	17.681	13.9253	21.2688	14.8426	13.9479	20.5581	16.9997	14.6325	16.5518	15.5208	17.398	10.7052	14.1431	18.4501	15.6627	20.0585	14.2715	13.5093	9.31718	16.1401	9.08012
EIF5A	202.387	250.331	290.787	291.401	245.568	262.631	404.042	351.71	262.518	415.031	357.717	392.133	329.248	383.2	324.587	418.087	390.218	371.076	390.922	283.57	262.4	275.567	419.34	359.468	291.132	352.325	338.661	311.195	287.486	312.371	251.598	230.921	163.617	411.929	379.99	326.032	346.72	422.337	369.032	378.13	330.916	323.396
EIF5B	12.5437	13.1912	10.3389	7.63236	11.1862	13.7841	15.9276	12.5766	16.3249	12.8954	17.3338	14.1483	10.5096	14.2194	9.2591	12.8247	15.2086	14.8449	11.9536	15.6104	11.0895	15.7734	15.223	15.7055	16.7131	17.621	20.0778	13.2183	14.1706	15.029	11.4132	15.3001	14.1022	16.3079	14.0857	9.2797	10.2269	13.462	16.2556	7.93451	9.28851	6.54397
EIF6	39.4454	71.6336	47.3855	51.2564	41.8855	75.1532	80.1373	68.9951	59.2696	71.752	93.8633	62.3587	59.3545	56.4641	60.7573	59.8554	60.6127	63.0239	64.0738	66.2149	50.5406	58.8108	75.4101	67.8569	61.3285	60.7138	54.8198	60.5498	78.3815	77.6569	42.914	70.0779	57.7272	82.0507	89.7708	50.6238	67.518	73.502	97.1106	65.6987	62.093	42.9833
ELAC2	6.64931	7.03417	8.42924	8.92184	5.95388	7.37979	6.03862	5.35898	7.30464	7.55969	8.14549	9.81825	8.45224	10.2833	11.7293	9.76889	8.96528	9.35804	8.39327	4.84486	6.27289	5.18132	4.70581	4.39572	8.50815	7.68098	6.63326	5.96673	6.09071	6.56343	6.10008	6.67212	5.0113	6.1828	6.53034	7.88715	8.78806	7.32962	8.5615	8.23002	11.9872	8.544
ELAVL1	59.8429	67.8476	72.3005	63.5502	43.45	71.1812	61.2704	67.7857	52.0956	76.7769	71.3181	65.7778	66.9987	73.7861	65.5742	77.0975	75.07	66.6782	69.3073	53.4264	57.9205	62.9303	60.4836	66.1659	59.8457	53.6082	64.9802	47.5532	49.3727	47.9329	48.5692	66.7163	71.573	62.7333	69.3897	60.5187	69.2294	78.452	73.7528	72.0337	67.0158	55.5358
ELAVL2	0.397051	0.294369	1.46459	0.684638	0.495693	0.329432	0.454902	0.306361	0.757316	0.791368	1.06253	0.251329	1.61763	0.507134	0.578515	0.599362	0.880823	0.16784	0.719881	0.836511	0.357152	0.259717	0.432432	0.732798	0.773201	0.370756	0.245232	0.455357	0.716333	0.237854	0.38083	0.935055	0.214873	0.465764	1.03988	0.528744	0.854132	0.862156	1.09929	0.831377	0.687875	0.714865
ELOF1	24.4954	27.3671	24.3181	16.2261	27.5568	28.7117	38.2088	36.345	22.3343	28.9595	39.0728	23.91	22.6331	23.6791	18.9399	34.4753	26.5951	28.0046	26.7323	20.6288	15.2771	23.7809	35.5662	42.8562	31.204	30.0484	36.9553	29.3279	23.8036	18.8111	28.2335	29.2741	24.8328	39.1211	40.8244	18.8588	19.6761	29.5914	40.4246	20.2895	19.3563	17.2669
ELP3	0.654992	0.598478	0.788791	0.792514	0.604316	0.627884	1.05036	0.496739	0.766237	0.491664	0.791833	0.846522	0.250405	0.375243	0.225123	0.418548	0.628288	0.396626	0.47133	0.637568	0.801713	0.988161	0.415469	0.499975	0.529436	0.75589	0.653663	0.46386	0.317971	0.425415	0.619156	0.653892	0.493238	0.662232	0.527726	0.773681	0.805733	0.502392	0.819228	0.388217	0.230072	0.730384
EMC1	3.44369	5.81209	4.84007	4.7182	4.10174	5.10893	5.25585	5.30332	5.99242	12.8544	5.79821	11.646	14.0074	11.7441	13.9113	13.2152	12.6492	11.9826	11.1108	5.07556	4.76645	5.07253	5.2852	4.37469	5.28586	4.94045	5.72459	4.74127	4.67096	5.48966	4.20246	3.22072	3.92162	5.38134	4.90349	4.27438	5.93864	12.9724	5.99881	5.40831	14.1555	4.39978
EMC10	2.07151	0.738313	1.32503	1.40713	1.71765	0.77459	1.84034	2.59545	2.19017	8.24681	1.39156	5.2245	1.10391	8.28454	5.11607	5.96751	2.61753	7.87233	4.0143	2.19411	1.11685	1.64363	1.85109	2.25823	2.16932	2.8289	1.24127	3.10625	2.69057	2.85591	1.75983	1.67795	1.8206	1.88428	1.60282	1.55044	0.349332	8.42674	1.4397	1.19871	5.22854	1.72885
EMC2	2.36809	4.57902	8.19851	6.15284	4.55392	4.80401	5.57758	4.9361	6.40132	9.59441	5.48234	15.8283	5.12979	8.87817	18.8072	12.8926	13.8094	16.2121	10.8816	5.57809	4.89425	3.16145	3.84909	2.81959	4.02858	3.92114	4.43128	2.50178	2.50031	2.72958	4.66575	5.10985	4.44569	5.71076	3.25137	7.70505	5.55878	9.80375	5.67201	4.59764	19.9099	5.4964
EMC3	4.80235	3.96715	3.84025	3.17613	2.7799	2.45742	4.90941	5.2016	3.85016	8.07916	7.43364	9.18701	6.91064	7.61652	6.52277	7.8743	7.2277	8.81285	9.38696	2.66558	2.24321	4.27316	3.57547	3.29129	6.6127	5.32161	3.52204	3.30079	2.24532	3.44385	3.01966	5.71123	3.41084	5.37529	6.35536	3.76503	4.60192	8.6098	6.78609	2.38941	6.66617	2.53669
EMC4	2.1066	2.06962	2.9707	1.92446	2.31947	2.17131	2.14059	2.23245	1.79947	3.95209	2.62019	4.9322	4.24748	4.22846	5.04085	4.11804	3.79888	6.38599	3.53198	2.781	1.43393	2.55012	3.38716	1.90318	2.77426	1.31796	2.0705	2.56669	1.47383	1.41865	2.37642	2.18136	1.96158	2.1917	2.7592	3.37689	2.32961	4.03832	2.71084	1.75602	5.15167	1.59363
EMC7	4.55398	4.54783	5.63513	5.83454	3.82842	4.77129	3.68287	5.10588	9.62091	12.2666	6.58764	11.9396	17.4343	13.8001	9.36875	11.3611	10.988	11.8295	11.7773	5.85678	4.35528	5.4074	4.95032	6.51631	5.25958	5.18854	5.89638	2.77773	4.014	2.24632	3.92243	6.18861	3.75726	3.7708	5.67188	3.60531	5.05219	12.5342	6.81555	4.02631	9.57471	4.5799
EMC8	4.51791	2.06675	5.82592	7.20156	4.77417	2.1683	4.70365	3.14677	4.87738	8.96486	3.99504	6.87265	3.79647	11.7554	7.0912	6.08864	7.08612	11.0669	8.68697	3.64924	4.77131	4.27783	1.30522	4.21699	3.67638	3.50887	2.93623	1.75371	1.49191	2.01846	4.8914	5.95724	3.03595	4.81595	3.07428	9.54998	6.80249	7.98562	4.13326	8.02471	7.24709	5.73036
EMD	32.311	38.2039	43.2708	27.1359	45.6832	40.0811	45.85	43.3401	43.8817	80.2376	50.1505	80.7667	69.363	75.0921	62.9876	84.4276	74.909	69.4647	70.1093	35.5789	26.2076	27.455	45.377	33.5421	39.165	28.4485	42.8435	50.3089	48.9994	49.8219	46.805	33.8381	44.2528	46.9448	44.4609	35.2823	33.581	78.6726	51.8855	41.4076	60.3269	43.7972
EMG1	9.30693	8.65313	14.6961	15.9517	12.0303	8.87455	12.1147	13.1164	11.5438	18.0571	12.6381	20.0854	20.3798	12.6804	26.7744	17.4281	16.8083	18.6236	12.1257	10.2611	9.54778	10.1476	10.3577	9.07184	12.5456	12.0251	11.0485	12.2014	11.4496	13.5428	12.3257	13.6613	9.70027	12.4039	14.5924	16.1323	15.6252	18.451	13.0753	14.4316	27.363	10.6871
EML4	3.21003	3.42423	5.19479	5.90455	3.5545	3.59248	5.74955	4.53473	4.18976	2.57182	5.9769	2.7346	3.39712	3.41	2.15518	3.48797	2.96825	3.41426	2.00336	4.21012	3.95666	4.72966	5.4794	5.0318	4.97875	5.0594	4.12424	5.44406	4.53849	4.55658	3.54309	5.79257	4.49981	6.04432	5.31402	4.76908	5.33243	2.80886	6.18368	3.85559	2.20256	4.34531
ENAH	9.91697	9.84891	13.7945	14.4494	21.0582	12.006	13.5353	11.6902	9.56867	10.0829	12.0199	7.06001	7.55785	9.07655	8.9399	6.41766	9.79551	10.5836	11.1084	10.9081	12.9489	13.711	15.8602	11.905	13.9602	14.207	10.3041	12.6374	8.52112	11.0393	21.5753	12.3976	8.1461	13.8585	10.9506	14.4023	11.626	10.8948	12.4357	12.2584	8.96129	19.9244
ENO1	753.701	773.998	806.859	739.029	907.711	812.028	806.171	906.222	840.662	793.93	767.712	752.037	795.157	731.67	892.181	771.08	766.373	871.695	865.369	434.386	557.35	420.575	372.036	530.059	459.448	531.376	541.021	417.552	423.405	490.86	465	443.614	329.359	412.195	441.153	592.164	505.197	405.31	396.698	543.923	453.813	507.264
ENO2	2.07219	41.1318	2.1105	2.01275	19.1796	43.1528	2.55341	32.3195	4.26395	1.67864	3.67506	2.05683	0.113969	1.32312	1.23039	29.9414	0.902289	0.633733	1.01702	33.1445	3.34122	2.95723	29.4458	2.45347	3.03628	42.6492	40.5681	0.499103	39.0001	36.7702	19.8111	27.7818	2.91288	2.61438	1.19904	39.4139	2.31088	1.71527	3.8022	2.32857	25.9679	1.40014
ENOPH1	4.80264	4.50457	9.89879	10.8399	3.83757	4.7259	6.10029	5.25988	10.9317	0.880081	6.7047	2.04124	2.35686	2.92014	2.94959	1.49028	2.01537	2.45448	0.407704	6.645	6.58968	3.73824	4.51784	3.76181	6.8742	6.43372	8.29068	3.29168	3.33004	5.02824	3.9318	3.46683	2.86446	6.24594	7.29093	9.82208	14.0945	1.03081	6.93666	9.18939	3.01444	9.50107
ENPP1	0.798719	0.9401	1.59267	1.66272	0.648373	0.986291	0.954247	1.01713	2.0111	0.652837	0.898136	0.563141	0.37016	1.09762	0.566037	0.88309	0.95043	0.694966	0.804728	0.689556	0.710698	0.728144	1.26172	0.854626	1.66925	2.73217	1.12132	0.759891	0.986402	1.31845	0.745922	1.0269	0.714104	1.07345	0.698185	1.8665	2.00805	0.74085	0.994281	1.20338	0.578481	1.50492
ENSA	22.4597	23.8942	23.5253	18.4777	42.5369	25.0682	12.8854	22.3346	4.11851	20.045	32.1036	29.3189	24.2193	28.7137	20.1855	37.6435	16.7499	31.2081	27.5058	22.4237	25.8744	19.3544	22.3242	21.6227	28.6598	30.4066	26.2731	27.0637	16.3132	22.5773	43.5814	22.2331	25.247	13.193	32.6654	24.4983	24.1127	27.696	33.2143	28.8233	20.6293	23.4446
ENY2	16.7436	11.3401	8.89424	10.7408	13.3406	11.8973	7.8989	11.4946	13.2039	7.95901	8.95795	13.4416	8.46334	12.2559	13.18	8.9716	8.58725	12.2778	13.4939	19.9488	17.8525	37.1872	7.48666	7.29829	17.6122	12.4233	9.21668	7.12652	9.91863	10.3501	13.6682	20.2757	15.099	8.08749	9.23834	10.379	15.0686	8.13266	9.26787	10.3621	13.4697	12.6889
EP300	0.438305	0.388086	0.600423	0.637016	0.137934	0.407155	0.27505	0.361907	0.488652	0.433875	0.503219	0.196032	0.239726	0.309207	0.0668198	0.126734	0.164705	0.465804	0.240058	0.374298	0.268396	0.0822114	0.379322	0.272167	0.231064	0.584786	0.351978	0.279557	0.43119	0.422955	0.141321	0.260352	0.496786	0.281617	0.584718	0.480511	0.554236	0.443341	0.520629	0.357288	0.0682888	0.372663
EP400	0.169886	0.030859	0.328473	0.0865134	0.104035	0.0323753	0.171659	0.162766	0.22562	0.182564	0.226654	0.134863	0.134373	0.291263	0.165605	0.194982	0.277553	0.278643	0.283746	0.511865	0.146563	0.258699	0.073872	0.0877277	0.342029	0.113658	0.19281	0.105146	0.0960446	0.216958	0.11136	0.35847	0.397858	0.175758	0.291047	0.0857523	0.114894	0.186547	0.265604	0.0490972	0.169246	0.00587326
EPB41	4.96583	4.55966	3.63443	3.6538	6.09091	4.7837	5.09572	4.2242	4.47036	7.29708	6.39528	6.87139	6.40053	7.32767	5.09578	6.08112	6.52469	6.19457	7.18584	5.35257	5.4786	5.82836	6.44382	5.02433	6.32646	5.08397	5.53754	5.63555	4.83698	5.81197	6.31498	5.93141	5.99096	5.45627	5.79461	3.80489	3.59922	7.41879	6.61654	3.56921	5.20781	4.17241
EPB41L2	56.2203	39.6877	37.1341	34.7652	33.5768	20.8189	30.7012	27.1741	40.1971	21.802	34.3129	19.038	10.4444	16.7179	16.3061	18.0063	18.1452	22.6108	20.4398	22.4574	36.8308	23.3979	24.3304	27.5482	24.2298	23.6435	30.4514	27.4334	23.0815	22.6044	32.9251	30.0638	26.5422	31.4343	30.6243	20.9837	19.4832	22.2777	35.7736	21.765	16.8645	24.0428
EPB41L3	2.49737	2.86422	2.44358	2.66818	3.48269	3.00495	4.27438	4.2242	5.73712	2.47519	3.98131	4.50366	2.95969	3.94367	2.23731	2.96536	3.1253	4.45342	3.39818	4.10519	2.53701	3.8175	4.62958	4.4846	3.84527	2.97687	4.40001	3.6815	3.64581	3.60245	3.19539	4.69502	3.38841	4.27272	4.32652	2.12595	2.39551	2.81144	4.11905	2.58904	2.19303	1.3883
EPHX1	4.67297	5.73955	6.9159	9.18388	11.3721	6.02156	5.57702	3.06066	6.94692	12.2357	5.65135	12.9808	8.56566	12.0657	12.1624	11.4468	13.818	11.2397	10.4402	3.9387	6.96004	6.58018	3.5371	3.63499	5.10139	3.41476	4.95983	4.35468	4.4948	4.76929	11.6513	4.59447	5.08725	5.71017	4.94605	9.70014	9.47085	12.5026	4.87655	8.90255	12.4298	8.31429
EPN1	2.82954	3.85756	3.45026	2.13202	4.0875	4.0471	1.61683	2.37996	5.16353	3.7828	2.95042	2.04262	2.4865	2.25918	3.49072	3.5884	2.81491	3.51354	2.6663	6.3456	3.6022	6.81961	2.52775	5.52946	5.5292	2.11568	3.704	2.1632	2.81429	3.98989	3.8434	5.44305	6.57543	1.65543	4.97955	2.71684	2.38339	3.86533	3.0525	4.51945	3.56746	2.36876
EPN2	0.611759	1.20116	0.929121	0.371282	0.525184	1.26018	0.730228	0.809527	0.896961	0.207911	0.818852	0.24159	0.134383	0.245876	0.129936	0.363287	0.416799	0.519098	0.0904675	0.555795	0.854031	0.192427	0.963695	0.37333	0.534898	0.227339	0.251731	0.559247	1.02787	0.441766	0.53808	0.513212	0.788905	0.747663	0.534373	0.503854	0.413082	0.212448	0.847181	0.673169	0.132792	0.154928
EPRS	23.2487	18.7494	32.0084	29.3268	28.772	19.6707	24.7885	26.2361	28.0409	20.2587	25.5191	19.6711	14.9652	21.004	16.2677	18.9984	20.2492	21.5931	19.4608	20.6554	24.9002	26.3888	21.7672	21.3278	27.0985	22.7091	21.8352	19.9201	19.4921	19.7969	29.4785	26.5666	25.3443	25.3804	26.5469	32.4084	35.6329	20.6287	26.4609	32.2443	16.5503	31.3766
EPS15	1.21801	1.50399	0.922377	0.652816	0.759837	1.47633	1.49122	1.67396	2.25326	1.02657	1.90042	1.37868	1.57919	1.25136	0.945943	0.954571	1.97086	1.36883	1.36888	0.978695	1.15331	2.06225	1.40698	1.22906	1.46197	1.23305	0.943198	1.20631	0.945273	1.25743	0.778495	0.982387	0.916267	1.52682	1.33125	0.901133	1.01252	0.647878	1.96617	0.954706	0.591155	0.923369
EPS15L1	3.67422	2.95253	1.91439	2.23	3.21604	3.42008	3.90613	4.27995	5.58107	1.75959	4.50163	2.09581	1.29949	2.25926	1.41043	2.39318	2.3043	1.56599	1.26144	3.29767	3.57152	3.37502	3.86777	3.57207	4.1145	3.36587	4.05624	3.05216	2.80118	4.23112	3.20784	4.24159	3.05233	3.9994	5.40157	2.07262	2.51353	1.63521	4.65737	1.84288	1.44144	1.6266
ERBB2IP	0.271045	0.780128	0.285155	0.161262	0.112139	0.0946534	0.209748	0.197345	0.399005	0.418715	0.211493	0.527775	0.525165	0.579354	0.565796	0.410696	0.36071	0.355862	0.308678	0.180965	0.179467	0.214751	1.12735	0.0477934	0.199851	0.146279	1.18849	0.0391949	0.127476	0.166471	0.103948	0.251346	0.112884	0.172049	0.19472	0.742057	0.0750126	0.406354	0.197972	0.171454	0.523157	0.0578889
ERC1	0.824437	1.03392	0.937108	0.674963	1.01352	0.788657	0.694295	0.794051	0.504379	0.172743	0.855362	0.499734	0.341053	0.531728	0.131833	0.656435	0.51765	0.470676	0.40568	1.00879	0.563143	0.756909	0.714471	1.00561	0.994668	0.704284	0.99984	0.903636	0.653199	0.77708	1.0947	1.97087	0.763307	0.710872	0.803772	0.897675	0.5975	0.176512	0.979158	0.717089	0.134731	0.617398
ERCC2	0.613229	0.995492	1.20091	0.952892	0.996499	1.0444	1.17184	1.22747	1.42616	0.443847	1.27058	0.534301	0.382859	0.19172	0.536815	0.890691	0.752381	0.261535	0.354675	0.571912	0.901498	2.28399	0.685712	1.50954	0.972163	1.44106	0.602258	0.828062	1.39261	1.31989	1.04317	0.536032	1.95814	1.19982	1.55984	1.01033	2.82815	0.453531	1.31454	1.03799	0.654245	0.842477
ERCC3	1.12803	0.742233	1.00988	1.1646	0.490161	0.778702	0.67786	0.662018	0.859091	0.188924	1.15978	0.377219	0.774759	0.484163	0.122578	0.337452	0.578892	0.297167	0.277456	0.631371	0.651919	0.80658	0.682161	0.446238	0.677437	0.413996	1.18201	0.603904	0.540973	0.660081	0.41636	0.85758	0.849287	0.442249	1.0918	0.618883	0.922875	0.193046	1.19991	0.618772	0.279558	0.803444
ERCC4	0.264773	0.347562	0.238998	0.250588	0.241137	0.33846	0.361739	0.244347	0.287787	0.151921	0.348978	0.347078	0.346385	0.224438	0.318765	0.29753	0.0553227	0.141282	0.129481	0.0995889	0.491643	0.185602	0.22723	0.146662	0.213879	0.187681	0.247737	0.0914719	0.129097	0.420338	0.247059	0.474469	0.0693134	0.370376	0.296072	0.394831	0.462054	0.155235	0.313616	0.303336	0.325772	0.188693
ERCC6L	0.726963	0.997284	0.576108	0.500522	0.599976	0.692517	1.07013	1.35035	1.01188	2.27287	1.52963	2.51718	2.11348	2.34484	2.09805	2.55393	2.14819	2.26835	2.12255	1.01286	0.763199	1.01658	1.00141	0.83109	0.769646	0.979044	1.12512	0.956302	1.086	1.02717	0.661974	0.989304	1.28276	1.09569	1.25108	0.676207	0.971792	2.32246	1.58255	0.661591	2.14417	0.403511
ERGIC1	3.1175	4.27261	2.56539	1.41366	2.89946	4.48254	4.45348	3.84189	3.82739	7.24384	6.47311	11.5957	9.16998	7.70068	9.34956	11.636	8.56436	9.38992	10.3537	5.28332	3.52706	2.18088	1.86068	2.75785	3.1155	3.65998	2.48905	2.79272	4.23723	5.24901	4.2477	3.55847	3.49356	4.55981	5.29043	2.54912	2.09742	7.40188	6.01158	1.48865	9.5551	1.84936
ERH	156.007	162.517	145.642	94.5976	157.2	170.502	237.699	228.01	209.574	194.356	195.459	197.949	196.132	173.558	117.403	215.019	225.284	211.174	190.195	208.834	109.862	184.585	238.892	257.282	180.129	202.324	239.167	226.132	170.067	193.428	161.06	149.893	116.023	243.374	210.5	123.129	153.53	198.597	202.221	161.322	119.984	181.548
ERI3	2.30899	2.45718	1.58669	0.598101	2.29998	2.57791	2.32391	1.5014	0.815761	0.617856	2.2454	1.11486	0.614207	0.92088	0.379094	1.26031	1.23975	0.67284	1.11492	1.28089	1.18338	1.679	0.859193	0.189691	1.84985	1.33294	1.32622	1.19718	2.54778	1.02125	1.74954	2.08794	1.79425	2.37939	2.33571	2.11002	2.39033	0.631336	2.32309	2.99555	0.217286	2.64111
ERLIN1	2.57088	2.75583	3.77937	2.67724	1.089	2.89123	2.86963	1.5251	2.3552	3.31412	3.79452	3.04419	1.13745	3.53196	3.31495	4.27192	3.74008	2.36731	3.50432	3.1386	2.29891	2.93487	2.60836	1.56475	2.18929	2.38513	1.27427	2.39037	2.50508	2.50743	1.11575	1.47192	2.53063	2.93815	4.37561	3.13664	2.49425	3.38643	3.9258	2.39163	3.38783	3.48833
ERLIN2	15.2685	14.5655	17.8867	17.554	11.8676	15.1771	10.4226	8.78896	10.4387	24.2296	9.58311	31.92	26.4346	29.7424	31.8008	30.5188	28.2998	29.7358	33.4271	7.38705	15.7521	8.47691	8.85983	7.13883	9.70643	10.0634	8.6239	14.6651	14.1304	13.3695	12.159	17.1199	11.6168	10.6714	14.0878	17.5547	19.7191	24.7582	9.35231	19.4887	32.4999	17.8197
ERMP1	1.2037	0.968877	1.89238	1.2333	1.81481	1.01648	1.14315	0.890197	1.54246	1.82348	0.760828	1.95824	1.68234	1.46139	1.47513	1.04983	0.976947	0.851635	0.929395	0.947203	1.27088	1.0066	1.16777	1.16993	0.849733	0.955986	1.08637	0.728234	0.92879	0.912241	2.08917	1.04728	0.886064	1.17045	1.06588	1.54507	1.69619	1.77063	0.78715	1.12252	1.42508	1.3015
ERO1L	10.0787	10.0197	13.8803	12.9132	10.3376	12.057	15.0645	12.86	21.4087	14.3431	16.415	13.7862	8.95441	13.6468	7.24559	16.1893	12.5285	14.2621	12.5744	13.8899	9.38595	7.7261	13.67	11.8303	12.28	14.6833	12.4535	12.0194	10.8	9.27963	9.29955	11.9315	14.1473	15.4242	19.1222	15.4926	17.0621	11.2116	16.9829	11.2019	7.40488	12.4016
ERP29	21.555	22.6788	33.5436	32.8333	19.2448	23.7931	17.3539	20.146	25.3932	37.0041	22.7793	34.1262	23.0885	37.3687	33.5004	39.4459	38.4039	41.3262	33.0102	26.0304	24.5893	20.3155	23.4904	25.9603	21.375	21.6548	25.9642	24.9305	22.618	21.3022	19.7174	22.0352	24.0388	18.1475	22.4501	30.1588	28.622	37.8115	23.5674	35.4574	34.2369	29.2376
ERP44	9.70614	8.49598	13.2503	13.1807	7.79552	8.91342	9.45414	11.3596	13.159	12.2162	10.5563	13.8239	9.9609	12.6872	13.2655	9.94921	13.3169	13.1329	12.1273	7.08415	6.28576	11.7537	9.31839	8.36989	13.9087	8.20175	11.393	7.99632	7.38615	7.29442	8.06452	11.4417	7.9745	9.67987	9.89148	8.46903	10.8632	11.2609	10.9215	8.96028	13.5571	9.54714
ESD	35.518	44.4541	63.5979	63.9998	43.3548	46.6384	46.004	45.2849	46.5253	17.434	45.0852	18.6048	16.2376	11.4586	19.4213	17.1807	12.7818	15.7313	18.8718	44.5103	42.933	51.6714	47.7901	64.0326	43.8399	44.1602	52.7817	36.443	49.9189	49.7058	44.03	54.8036	52.1364	46.9821	52.4134	56.5628	67.9026	17.8144	46.4676	81.584	19.8482	44.8984
ESF1	1.52087	0.432674	1.20156	1.14954	2.47194	0.545284	2.1517	2.4648	2.74295	2.89998	2.67131	2.99577	1.76247	2.72913	1.97031	2.92549	2.83282	3.62685	2.84692	1.09176	1.60823	1.54255	1.42845	1.1825	2.22175	1.4356	1.00884	1.10234	1.11048	1.1915	2.53264	1.34891	1.34127	1.969	1.93603	1.42139	1.59062	2.96325	2.61231	1.00546	1.84038	0.917768
ESYT1	7.86104	10.2542	7.48799	10.8161	6.98411	10.7121	8.06308	9.16089	14.5522	18.6909	8.11195	17.6912	25.9561	18.74	21.6932	16.1618	19.4206	21.1436	17.2083	9.95917	9.57766	7.70741	6.71643	9.63969	7.46497	7.607	9.367	7.4429	9.04184	9.53779	7.02289	8.98856	7.57515	8.34729	8.97213	9.67557	7.59725	19.1877	8.01094	6.83223	21.8575	7.99795
ESYT2	2.91511	3.07025	2.87871	2.72835	2.83687	3.2211	2.64766	2.68189	3.58229	7.22297	2.94435	5.81745	8.77212	5.31082	6.49295	7.30318	6.54962	7.4534	6.98409	1.44996	3.24228	2.54411	2.44226	2.96843	2.87191	2.67466	3.0046	2.70561	2.62443	3.17487	2.92335	2.56334	2.6601	2.71088	4.51635	1.89261	2.1869	6.93122	3.04621	2.17798	6.56487	1.99506
ETF1	15.3302	17.8973	20.8447	20.3781	10.3683	18.7767	16.6837	14.6994	18.2526	14.3035	18.4177	12.1263	14.223	16.2339	14.3982	14.7314	15.9102	13.122	14.1171	14.6101	14.9875	14.0275	15.619	13.5509	15.2471	15.9797	13.0375	16.9427	17.4305	16.7299	10.6229	16.2629	13.2109	17.3476	17.0459	24.7759	19.1846	14.2141	19.1079	18.7425	14.6127	19.2036
ETFA	22.5283	44.5928	55.7703	46.0508	32.2991	46.7136	29.2741	43.2591	43.4296	69.4273	41.6025	64.1808	98.3209	57.9166	80.1566	78.0492	71.5368	69.8856	64.3976	46.9027	35.3688	31.3258	41.557	44.846	40.2381	36.7488	43.5254	41.0492	31.4932	41.475	31.3318	27.9253	32.733	29.1508	38.1117	47.9674	56.7251	70.9421	43.0419	54.9261	70.9704	50.7826
ETFB	27.674	33.6698	36.4691	34.2749	23.3296	35.2063	32.1348	33.3434	51.6304	79.1152	34.7308	80.8044	97.7099	74.7224	70.8999	73.0011	66.7763	70.791	62.1321	33.0116	32.0643	34.229	36.7913	33.137	33.1762	39.0598	34.8286	30.2199	28.6712	29.4406	23.8948	31.2434	26.1157	27.7078	32.6517	33.647	39.912	80.4223	31.4506	37.377	72.4586	38.6754
ETFDH	1.32092	1.35007	2.36087	3.68408	1.31135	1.4164	1.35515	1.44473	1.30504	4.7767	1.34069	6.73936	5.37516	6.49681	4.78865	5.09938	5.13893	7.06635	3.6023	0.351578	1.58473	1.43748	1.54677	1.5949	1.4299	1.57481	1.07439	0.915858	1.26537	1.21906	1.34355	1.04728	1.05565	1.38751	1.3186	2.06643	2.17577	4.88092	1.38707	2.68603	5.20086	2.0078
EWSR1	34.2056	14.1257	38.4977	34.1297	30.5059	14.8198	28.33	26.2218	26.5326	32.7908	28.855	34.5041	23.3815	40.1595	26.0135	34.6443	34.7302	44.8881	35.124	22.1635	23.139	21.5886	28.9982	25.9032	22.68	21.8966	25.6722	25.6688	18.1393	20.218	31.255	35.9766	52.3749	29.0064	26.4637	33.394	37.5427	33.5062	29.8533	37.8041	26.5853	28.6206
EXD2	0.634713	0.76427	0.414629	0.583347	0.985029	0.801822	0.766826	0.53524	1.18605	0.832091	0.652943	1.88965	1.23234	1.29569	1.34113	1.07077	1.0333	1.69957	1.54771	1.08809	0.44841	1.26218	0.711896	0.478347	0.723954	0.764282	1.15274	0.75822	0.92728	1.06247	1.00922	3.36768	0.818645	0.785135	0.859889	0.318069	0.176958	0.581674	0.675532	0.268013	1.37062	0.284219
EXOC2	0.65167	0.481087	0.875225	1.04472	0.72626	0.602244	0.954976	1.04698	1.38176	0.559325	0.921991	0.517061	0.539205	0.264917	0.324653	0.36095	0.457537	0.382522	0.243917	0.711535	0.75375	1.37425	0.790736	0.385835	0.934844	0.660051	0.37106	0.416071	0.79442	0.522756	0.744094	0.635327	0.0774545	0.977778	0.795924	0.95882	0.704923	0.571529	0.953889	0.74228	0.33179	0.851781
EXOC3	0.589804	0.559818	0.598589	0.627526	0.721695	0.587324	0.796738	0.694582	0.306762	0.166893	0.823154	0.360765	0.282161	0.256253	0.431211	0.367605	0.0934804	9.36505	0.214588	0.772505	0.518147	0.690787	0.791729	0.833528	0.535941	1.01614	0.973921	0.491322	0.608714	0.593967	0.739417	0.753198	0.732155	0.86211	0.613277	0.844364	0.450098	0.170534	0.851633	0.349547	0.440691	1.34169
EXOC4	1.04551	1.34696	1.34816	1.45324	0.708719	1.41314	1.89569	1.15688	1.52557	0.800506	1.19699	0.665637	0.885308	0.584404	0.457089	0.481207	0.522456	0.511236	0.464477	0.804081	1.01466	1.40447	0.757366	1.22707	1.56426	1.39845	1.22776	1.01218	0.864723	1.88343	0.869356	1.1792	0.886575	1.82827	1.72197	1.37025	1.30013	0.858333	1.20796	1.42904	0.532368	1.02273
EXOC5	0.352543	0.804603	0.928174	1.06578	0.446239	0.844137	0.43371	0.574306	1.03612	0.198184	0.423226	0.360432	0.357047	0.272605	0.200013	0.265145	0.229404	0.387068	0.265716	0.430007	0.437371	0.432705	0.404968	0.467749	0.587173	0.56314	0.274805	0.196354	0.213907	0.0366463	0.457197	0.492688	0.452247	0.444066	0.459736	0.685043	1.18762	0.202508	0.420808	0.322388	0.20441	0.586342
EXOC7	1.27201	1.95226	1.44926	1.92461	2.69144	1.95202	1.02248	1.27318	1.52802	0.897277	1.17573	1.116	1.31555	1.36783	0.269159	0.576689	0.392594	1.40307	0.811915	0.981941	2.55625	0.836362	0.584255	0.978538	1.66422	1.52009	1.38002	0.54674	0.648334	0.482891	2.75753	1.54218	1.20538	1.0469	1.59956	1.59048	1.65332	0.45531	1.33149	1.44139	0.179163	0.976935
EXOC8	0.248747	0.849693	0.429827	0.564404	0.171046	1.01449	0.613028	0.407981	0.115813	0.162404	0.416671	0.192008	0.275588	0.247785	0.223336	0.138015	0.123991	0.120495	0.0624731	0.371444	0.550676	0.108954	0.494847	0.616219	0.29139	0.396192	0.331974	0.610661	0.249455	0.561225	0.175246	0.637663	0.264278	0.627665	0.306048	0.71856	0.730445	0.165947	0.431086	0.706479	0.228246	0.377965
EXOSC1	5.15441	8.97532	13.6951	7.9797	5.68116	9.41632	9.58866	4.50193	10.078	4.70928	13.6695	6.47718	6.23926	4.57442	1.26251	3.89729	0.214772	4.56998	2.01739	10.2691	10.413	6.08914	12.869	7.98215	7.49202	10.7873	9.32669	10.9215	9.84059	10.0226	5.82067	9.61764	5.75871	9.8176	4.10393	9.34613	13.5479	4.81203	14.1424	7.75701	1.53288	5.48294
EXOSC10	4.60907	3.94086	4.21894	3.52962	3.54071	4.13449	5.15374	5.47899	4.61376	3.58983	5.38958	4.32051	3.78422	3.71155	3.24379	2.88272	4.57237	3.83261	3.35894	4.16143	3.92142	5.10073	4.12103	5.14683	4.94783	5.47951	5.82894	5.18443	5.04293	4.50522	3.62765	3.88464	3.1958	4.98672	5.92808	2.9256	4.47244	3.66815	4.99386	3.58022	3.33639	3.51037
EXOSC2	10.5041	7.71022	17.0738	18.3532	7.49792	8.08906	8.51488	10.0228	7.55618	4.39465	9.71789	2.57195	5.16108	4.6806	11.9354	4.63766	3.61902	5.57765	3.04346	4.75616	4.45513	9.57545	8.00648	6.63488	9.91203	8.7863	7.4566	6.78984	7.37582	7.01895	7.29594	7.644	8.17411	8.71819	10.7115	18.6176	12.3831	3.60581	10.0541	18.6902	12.1978	13.3682
EXOSC3	12.0046	9.01464	10.3236	10.189	11.7102	10.2596	17.1724	13.91	19.6581	8.2022	17.1971	10.7582	4.30228	9.20279	9.58015	11.4662	11.0993	11.3896	9.02146	13.1841	15.7936	13.5441	13.433	17.8476	9.9177	12.1218	16.6706	11.7108	14.6488	14.7836	11.9977	19.3505	9.88493	17.5824	16.3158	11.3246	14.1088	8.38116	17.792	14.9477	9.79076	9.11535
EXOSC4	10.8755	10.502	16.936	13.8784	17.7403	12.6557	11.2151	12.7984	13.0088	8.52021	11.3023	8.49289	9.49201	5.3759	7.3071	8.7096	8.21317	7.9514	5.92269	13.6509	18.2495	16.4603	13.028	11.6395	15.059	14.2653	10.2463	13.8803	13.9221	14.4916	17.8103	12.0285	11.2553	10.932	12.6614	13.8754	14.3127	8.70611	11.1231	14.2226	7.46774	15.9977
EXOSC5	15.1107	11.4881	11.5364	15.5506	6.93613	12.0525	7.86745	10.0515	15.0182	6.12064	9.38506	6.51553	8.38535	6.68865	7.04668	5.81468	4.77338	6.31744	5.62336	15.8665	10.7208	9.38357	8.09348	13.361	11.1805	11.9893	12.999	10.9971	12.0563	12.2347	7.10646	13.6544	11.4142	8.0553	11.8798	19.2037	17.644	5.95694	8.37754	12.9524	7.2016	14.6328
EXOSC6	5.39748	3.99308	11.1134	10.156	15.136	4.18928	7.81	8.8539	12.7533	10.5391	11.8674	9.06126	2.61183	9.33128	9.82423	8.89801	7.20387	7.38453	11.3963	13.0731	14.5642	10.7649	10.7424	6.91212	10.1515	12.5579	5.45353	11.4793	10.2844	11.134	15.5077	13.1784	10.1226	7.99647	9.05167	10.7121	8.71874	10.7691	12.2779	11.1741	10.0402	9.32311
EXOSC7	8.53469	7.50371	10.0828	7.91746	5.87112	7.8724	9.7321	8.62956	12.1094	6.28159	9.82483	5.67762	3.36533	6.72524	5.45609	6.00276	9.18704	7.0096	5.81011	8.50893	5.04029	6.60921	10.3119	7.41508	7.2367	6.60077	9.73243	8.11057	8.0153	9.40458	6.01529	9.8969	7.58726	8.24813	10.3928	7.25067	11.9599	6.41864	10.1647	7.92728	5.57604	7.37042
EXOSC8	5.31486	15.6064	15.0002	10.8368	10.501	16.3732	10.9761	9.00402	17.7164	6.09668	12.3679	11.3278	6.49043	6.47178	11.919	9.07672	8.10584	7.37178	8.15285	4.62059	12.722	9.05037	7.17382	7.50887	8.10263	9.04772	9.09839	10.3074	12.7319	11.8569	10.7588	14.3154	9.85146	11.2381	11.964	13.5396	10.8501	6.2297	12.7958	13.9423	12.181	7.57737
EXOSC9	6.41476	6.29932	7.90152	5.87105	5.42058	6.60884	9.023	7.7117	10.4836	3.98756	8.99402	4.51963	4.4248	3.45396	3.62022	2.28337	3.40018	2.89241	3.38023	7.1376	6.80762	6.34209	9.39446	7.43101	8.03255	9.44248	9.40768	7.77123	6.71569	6.75685	5.55369	7.20719	3.36183	9.23844	8.57277	9.3798	7.96179	4.07457	9.36737	6.92921	3.6998	6.97034
EYA3	1.09637	0.861393	0.894926	0.907169	1.07559	0.903717	1.5567	0.998573	0.837871	3.01963	1.79412	2.90769	0.814627	2.73401	1.06716	2.63835	2.67538	1.82831	3.00773	0.664849	1.75831	1.0094	0.705636	0.915933	0.946283	0.666403	1.16172	1.16535	0.492635	1.38059	1.102	1.42838	1.9776	1.59387	1.37191	1.042	0.801071	3.08552	1.85619	0.595016	1.09062	0.827527
EZH2	6.10818	9.31484	9.11858	11.0142	4.17311	4.88626	5.29516	2.52038	6.04514	5.47173	5.12458	7.18375	5.98826	4.83907	2.55968	6.57922	6.10081	6.59858	3.77599	4.25407	3.16177	2.15298	3.50698	4.26296	3.00665	3.48764	5.15177	4.0607	4.66341	4.9515	4.54424	3.72878	4.35182	5.42159	5.59972	4.47031	4.47387	5.59111	5.44943	6.98049	2.78987	2.52892
EZR	15.344	7.34465	11.5304	10.0346	5.22095	7.56673	8.63077	9.99838	11.5797	7.81727	7.4387	5.38111	5.21489	6.35982	6.23286	5.06097	5.84574	5.47996	6.06252	13.5057	29.0412	15.5168	16.2958	19.6821	13.794	20.4436	20.1023	22.7916	22.7749	21.1212	22.0584	15.8721	13.9431	19.2336	15.8197	27.911	23.5165	14.9912	16.6274	24.8494	14.1959	40.2156
F11R	1.52636	0.738958	0.892974	1.46438	1.07499	0.775267	1.12467	1.02506	1.76413	1.45754	1.42737	1.09374	1.70717	3.25889	2.39937	1.82618	3.99933	1.78916	2.08902	2.08372	1.07613	2.06742	1.54226	1.07278	2.91442	1.399	1.09545	1.8904	2.18752	2.04581	1.50638	1.96018	2.60884	1.15153	1.47799	1.22928	1.31192	1.48935	1.62484	1.01403	2.45212	0.900686
FABP5	41.5576	34.2961	38.3327	39.3276	45.9928	35.9812	71.5017	64.5876	51.3186	27.6831	54.3476	26.0778	29.4728	25.8207	19.3785	27.497	15.3743	31.5212	15.8141	51.8538	43.8444	50.1097	58.3565	73.5039	52.1269	59.5478	68.1014	65.249	52.2583	56.0044	43.5162	40.0854	46.9384	73.2089	54.9459	21.0775	47.3251	28.2871	56.2278	50.7799	19.8045	33.5862
FADD	4.42049	7.26625	4.14587	5.50464	2.03498	7.62327	6.41359	5.40351	6.97083	3.71624	6.56486	4.34446	4.38308	4.76115	3.22964	1.98281	2.92311	4.016	3.71872	3.36972	3.45293	3.4838	3.2352	3.39117	3.85042	0.950705	4.40039	3.52568	5.45144	6.94614	2.08495	5.35507	2.93424	6.56673	5.30307	4.66806	5.31171	3.79733	6.79198	7.91171	3.30064	4.12959
FAF1	3.44428	2.46901	5.11658	5.41243	2.90981	2.59032	4.07421	3.2613	6.27277	1.39811	4.85604	1.44086	0.912048	1.98604	1.43116	1.53419	2.23169	2.24705	1.65565	3.98109	3.90238	4.34374	3.72423	4.43721	4.4484	3.82023	5.39476	3.43174	3.68354	2.85669	3.49509	4.63643	3.91806	4.17149	4.50202	6.48323	6.21259	1.42862	5.02404	7.3683	1.46262	6.37966
FAF2	16.228	14.1066	9.59293	12.2185	8.61938	15.0191	12.7055	15.4568	20.0172	27.3982	13.4341	20.2904	28.8237	25.7366	23.9926	23.0908	27.8571	23.6674	24.7931	15.7349	10.9993	15.4942	16.1462	15.2203	22.3399	12.714	15.995	14.968	15.072	15.552	8.83104	16.4915	13.3949	13.1764	16.8099	12.9954	14.176	26.9307	13.1355	10.5466	24.5201	11.3989
FAH	2.99793	2.69787	4.07772	5.6754	2.43319	2.60412	1.78426	1.40348	2.52463	1.03456	1.87929	1.08783	0.612303	1.21431	1.785	1.09309	1.53704	1.08406	1.32858	1.20286	2.22286	1.87071	0.695876	0.812489	1.85565	0.709121	0.850335	1.93128	2.29914	2.582	2.49294	3.96252	1.13666	1.82686	2.28451	3.59767	5.56716	1.05713	1.94431	3.87283	1.60763	5.53091
FAHD1	5.27438	1.41723	4.09363	3.67271	3.7171	1.48687	2.82652	7.21933	5.60025	5.78212	5.80258	5.07719	7.59824	6.78483	8.34428	4.01793	5.3281	6.41978	6.85804	1.89345	4.6035	6.52712	2.83503	6.66811	7.37931	5.73884	6.88511	4.18558	4.93787	3.61839	3.80837	5.49767	4.17654	2.894	5.14674	4.99276	5.48947	5.90827	6.00333	7.73187	8.52773	6.09575
FAHD2A	6.21266	8.57186	10.8939	12.5682	7.61036	8.99304	8.30013	8.05639	10.4273	3.7738	11.1524	2.72467	8.20075	5.37838	5.93307	4.72022	5.96507	5.41314	1.52928	9.34262	7.75747	8.44972	6.28159	8.98571	11.3086	6.38378	11.1227	5.96578	6.30937	6.3763	6.86368	10.5728	6.51277	6.16322	8.55834	9.00223	11.9754	3.85614	10.1385	9.67318	5.55621	9.31408
FAM103A1	2.38848	2.06448	3.87178	1.04034	0.895597	2.16592	2.95845	3.47991	2.98193	2.07026	1.88549	0.47913	0.753549	0.861517	0.693889	1.03382	0.844993	1.02635	0.523013	1.07528	1.51475	2.443	3.61872	2.24014	3.04633	2.65165	2.23514	2.75685	2.25644	2.94799	0.917589	0.684005	1.99956	3.02909	2.84484	1.41639	2.33777	1.81312	1.95072	1.64925	0.35669	1.26744
FAM114A2	2.49355	1.96983	1.59545	1.51064	1.96998	2.99003	3.45296	2.50714	1.98082	3.21253	3.06445	3.10253	2.88833	3.06622	3.01615	3.17155	3.17549	3.22711	2.92508	0.962928	2.48607	1.58565	1.303	1.43828	1.08397	1.49821	2.70284	3.50671	2.68659	2.84233	2.09002	2.88446	2.16891	3.47392	2.86633	1.04537	2.00078	3.28262	3.17046	1.58953	2.64979	1.32507
FAM115A	0.821565	1.13772	0.271181	0.256466	1.01254	1.19362	0.984556	1.81371	0.670583	1.75959	0.856691	2.55132	2.72409	2.04209	1.72754	1.93203	1.77988	2.33721	0.816647	0.600662	0.928406	1.0069	0.663583	1.73568	0.508464	0.996167	0.521789	0.703334	1.01514	0.825308	1.0374	0.617287	0.891618	1.00806	1.423	0.378104	0.586029	1.79798	0.886329	0.115344	2.14249	0.185703
FAM118B	0.745889	0.260776	1.25569	1.08307	0.59562	0.273589	1.1515	0.724986	0.61479	0.161533	1.22527	0.361595	0.528857	0.331314	0.18077	0.166583	0.337981	0.398361	0.340185	0.490292	0.443265	0.9014	0.747807	0.399736	1.19454	1.01363	0.605065	0.650573	0.321049	0.863954	0.610246	0.866961	0.620778	1.17899	1.06125	1.37344	1.42488	0.165057	1.26766	0.476213	0.184744	1.82912
FAM120A	6.86974	7.21833	3.17569	3.19319	5.02965	8.18008	4.43103	3.65044	2.4484	3.31642	5.68052	2.94749	2.49312	2.98341	2.369	3.06757	2.81009	2.44396	2.74079	4.10673	2.91051	5.06503	5.51306	3.09388	5.30466	2.79779	2.736	6.1996	5.67148	5.74566	5.15315	5.37259	6.41249	4.53683	4.55807	2.87091	2.60665	3.11735	4.53063	2.70204	1.98359	2.19749
FAM125A	4.58966	3.42518	3.00857	2.48082	2.3083	3.59348	3.78003	4.18194	3.30415	1.48539	4.92684	1.12989	1.16732	2.47732	2.19838	0.98918	1.40856	1.67164	0.901902	1.24608	4.60654	4.41632	1.65748	1.91789	2.76164	2.81008	2.24342	4.39548	3.72286	2.84292	2.36498	3.07773	1.41425	3.87029	4.64076	2.57842	3.03863	1.5178	4.27669	2.27229	2.24671	2.28367
FAM129B	0.515608	1.02066	1.92279	1.39829	0.741935	1.07081	1.75654	1.0792	1.65273	1.37768	1.38314	1.44281	1.29883	0.839575	0.868552	0.816055	1.41471	1.08941	1.39483	1.26518	0.590618	1.28242	1.84335	1.88788	1.02099	1.24737	1.49944	1.29984	0.902237	1.246	0.760154	1.46489	0.348715	2.01887	1.25455	1.63589	1.44163	1.40774	1.74143	1.42014	0.887646	1.20358
FAM136A	3.53386	2.38571	7.2123	8.7643	5.57666	2.50293	3.70564	3.04194	5.22825	9.13754	1.19838	17.5655	11.529	6.206	16.5528	5.88737	7.86214	17.9892	14.0331	4.99414	2.42014	5.20618	5.58357	6.18264	4.13395	6.47319	6.21622	4.23378	3.55028	4.17662	5.7136	7.49061	4.00671	3.79412	3.57657	9.9959	3.7849	9.37587	1.23984	8.58881	16.9167	8.76324
FAM169A	0.980229	0.569533	1.61746	1.55421	1.65019	0.597517	1.658	1.92782	2.13222	1.61511	2.49825	1.82137	0.450328	1.79036	1.30067	0.883251	1.137	1.44783	1.59952	1.46801	1.92572	1.60016	1.21359	0.76585	1.50358	0.485757	0.871526	0.835103	1.05055	0.888904	1.84125	2.39253	1.04159	1.88279	1.72302	2.55804	0.324647	1.65035	2.58468	1.40479	1.32927	1.79687
FAM175B	0.770697	0.928341	1.91936	0.24942	2.65103	0.973954	1.07548	0.782311	0.165191	0.671889	1.08866	0.504782	0.648381	0.984677	0.461014	0.377155	0.716543	0.921265	0.850749	0.930722	2.24848	1.05719	0.482024	0.466038	1.41753	0.893113	0.669147	0.935045	1.02918	1.05761	2.71613	1.34317	1.24538	1.22961	1.29132	0.17471	0.544109	0.686549	1.12632	1.21317	0.471149	0.43874
FAM188A	0.665587	0.742161	1.43211	0.681241	1.55191	0.778627	1.57315	0.782075	1.94965	0.508169	2.33057	0.300948	0.294016	0.259049	0.385432	0.744776	0.270355	0.452037	0.78709	0.450587	1.57238	1.15062	1.47471	0.693276	0.492143	2.21745	1.7106	0.875414	2.27669	2.3264	1.13863	0.237047	1.23303	1.61071	2.56789	0.546235	1.02254	0.519257	2.4112	0.622643	0.393905	0.59458
FAM195B	7.6656	8.81351	5.22438	5.05824	2.2011	7.85059	12.2954	9.01077	8.0955	3.3483	9.54072	4.1637	1.63555	4.29271	1.92469	1.47265	3.13406	4.69579	3.29751	8.614	5.22684	10.3256	9.60716	6.09062	8.98156	6.83448	6.15161	5.16412	2.58511	6.51974	2.25515	7.0731	6.89728	12.589	10.9222	5.29717	7.73125	3.42135	9.8708	6.27058	1.96701	5.09461
FAM203B	1.98231	1.77587	1.96296	1.52125	1.71421	1.86313	2.99467	2.29992	2.90578	4.50114	3.04179	2.57924	2.33053	1.64842	2.85003	2.55296	2.70458	3.35043	1.22554	3.42148	2.23987	3.36834	2.79347	2.93854	3.66466	2.62682	2.91042	2.75021	3.02599	3.22347	2.00092	3.32354	2.5171	3.06618	3.4628	1.55444	0.823552	4.59934	3.39606	0.954239	2.91269	0.874156
FAM207A	5.11099	4.61942	0.703718	0.918081	2.3589	4.84639	6.19697	5.39794	8.14121	6.76278	6.91098	3.82281	6.20234	6.20097	3.14905	4.4727	4.2488	3.46004	4.86472	7.477	4.88099	4.92354	6.50002	5.8999	5.43207	6.28366	5.80144	4.81263	4.50751	4.9145	2.41682	6.18396	4.97095	6.34493	5.70991	0.603139	2.42053	6.91034	7.15008	1.25109	3.21828	0.516299
FAM208A	0.99993	0.860114	0.667393	0.886805	0.690577	0.863358	0.839899	0.694851	1.24865	0.116694	1.02893	0.279684	0.0766199	0.479774	0.100317	0.378974	0.330618	0.374934	0.180584	0.91862	0.879805	1.35735	0.850004	0.827551	1.32993	0.956875	1.36613	1.13299	1.02846	0.918754	0.530999	1.17573	1.12463	0.914219	0.929354	0.669773	0.803518	0.159455	1.08979	0.574152	0.135739	0.578736
FAM213A	4.03677	2.94393	2.80038	3.45846	2.64451	3.08858	3.30579	0.930258	3.28538	5.24538	3.41974	2.71014	5.07102	4.26656	2.91977	4.63224	3.56457	3.08466	3.80243	5.33508	2.14062	3.59409	3.07971	1.83619	3.70331	4.29237	5.37951	3.26492	4.39114	2.52219	2.70945	2.61549	4.52034	3.38472	1.07473	4.47277	6.00002	5.35982	3.53805	6.02112	2.98396	4.18605
FAM21A	0.918638	0.357528	0.522733	0.249735	0.871683	0.375095	0.677633	0.911619	1.29329	0.71049	0.996214	0.65476	0.390923	0.706421	0.726631	0.735444	0.987759	1.05555	0.747636	0.779962	1.2167	1.01709	0.782288	0.181952	1.2127	0.78151	0.41832	0.628444	1.08149	0.86055	0.872965	1.16554	1.12656	0.693812	1.06209	0.304118	0.301329	0.743056	1.14799	0.119615	0.742605	0.0403014
FAM3C	3.94709	0.635274	1.50251	0.388211	3.48951	0.666488	1.05644	1.28659	1.11969	6.33296	1.35821	6.24574	2.10669	3.18607	3.13238	5.86708	5.94123	4.56067	11.1149	4.29979	5.3907	4.72082	1.7964	1.31555	0.742285	0.886629	0.438099	0.472305	0.766299	1.54003	3.57519	4.80724	0.414117	1.08166	1.04111	0.966101	1.66765	6.47113	1.4052	0.943151	2.56709	1.99777
FAM49B	12.1801	8.88473	9.06403	8.38853	5.17965	9.14362	12.421	11.5797	12.6962	3.26246	13.3619	4.32686	1.85122	2.69554	2.90212	3.73492	3.69265	3.7619	5.12905	11.0834	9.59892	9.90864	15.2032	11.9968	12.2039	13.5647	11.1606	9.43111	9.63444	12.0208	5.30684	8.7089	10.1763	12.7773	12.9933	6.88165	7.49641	3.12801	13.8242	7.71041	2.96592	7.25543
FAM50A	12.5133	16.3426	14.6074	22.5105	30.8627	17.1455	17.8159	38.6542	21.6005	11.2665	33.1919	6.44448	7.91729	10.7026	7.78397	9.63062	8.04507	7.86787	8.15374	14.0715	25.9332	15.6689	14.4664	12.9015	11.3735	12.5927	11.4298	32.0248	25.0468	25.1097	31.6206	14.0126	13.9301	16.6406	17.9803	18.7805	21.1285	10.6485	29.8939	21.6197	7.95509	34.9917
FAM82A2	1.81285	1.53781	1.54534	2.18404	1.09972	1.61337	1.88054	2.00296	1.81392	2.70154	2.10892	1.72109	3.77313	2.0578	2.07086	1.39923	2.35125	2.1463	2.14596	2.3813	1.53126	2.53226	1.81626	2.01717	2.78057	1.15972	2.03377	1.6933	1.47409	1.60308	1.12673	1.7966	1.10723	1.92544	2.36721	1.76894	2.08795	2.59794	2.18188	1.13576	1.90963	1.55379
FAM82B	1.31632	1.09287	2.25125	2.78698	0.659467	1.14656	1.7546	1.0991	2.43322	2.78148	1.54279	2.66148	0.517185	3.11055	1.86197	2.96778	3.04038	3.01739	2.78631	0.441507	0.719327	0.985742	0.529883	1.11643	1.50552	1.02341	1.0996	1.05514	1.20472	0.689852	0.675661	1.78493	0.957685	1.79649	0.882749	3.0561	3.22685	2.84217	1.59617	1.63991	1.90291	2.53244
FAM84B	1.91498	1.47352	1.31745	0.402643	3.13568	1.54592	3.86521	3.80217	1.88411	2.9956	4.81839	1.57654	2.24858	4.67902	2.52963	5.0131	4.27011	3.97302	3.84322	0.984809	2.23592	2.23327	1.66248	2.1023	2.30433	3.30862	3.82004	1.92729	2.77854	2.11291	3.21268	3.76935	2.96118	3.95749	4.36718	1.36006	1.88198	4.00862	4.98509	0.967163	2.58525	0.865105
FAM91A1	0.487498	0.51615	0.761755	0.487727	0.275493	0.541511	0.513818	0.522505	0.3929	0.441544	0.705335	0.180911	0.339944	0.308726	0.233314	0.286921	0.239198	0.404667	0.187486	0.48457	0.366115	0.581451	0.462016	0.360825	0.531407	0.371827	0.546182	0.344256	0.613103	0.527813	0.282258	0.353334	0.352596	0.526087	0.546161	0.84542	0.875213	0.451178	0.729737	0.676317	0.181584	0.192804
FAM96B	9.07768	7.53729	9.3977	4.6993	9.4065	7.90763	12.3173	10.8629	19.8719	9.39583	16.77	13.3014	3.79416	8.43032	14.4804	7.08453	8.3355	14.3265	13.0231	13.9229	11.9857	17.5341	9.01027	6.27683	4.7081	7.48125	15.1278	6.77409	8.50007	9.94038	9.63749	18.0412	15.3554	12.6114	17.3672	9.20052	6.92955	9.60084	17.9636	5.89044	11.4829	9.62572
FAM98A	2.15795	2.30541	3.93159	2.87843	3.16394	3.47399	2.66687	3.46203	4.86546	2.31431	3.03452	3.88417	3.85028	3.13017	3.92724	4.29319	3.27746	4.55398	3.06981	4.22355	4.01652	7.25608	3.08476	4.44213	6.92985	2.54162	3.70796	3.31046	3.46429	3.18963	3.24163	3.48247	2.96913	2.02185	2.54356	2.86172	3.49486	1.72012	3.1395	2.52165	4.01357	2.90813
FAM98B	8.68435	9.90173	12.1848	14.5647	7.66284	10.9101	13.1447	13.1046	10.877	7.29132	15.8904	7.40707	8.06531	8.98262	6.20358	9.24248	8.79955	8.49913	8.58989	10.7011	8.02807	11.0214	11.7379	6.92903	9.93457	10.781	10.0453	9.31971	10.9213	8.3556	7.85101	9.77488	8.92734	13.4585	15.571	15.4562	18.8562	7.26279	16.4402	15.01	6.54615	13.1062
FANCD2	1.35621	1.52598	2.27976	3.54806	1.68362	1.52761	1.17889	1.55184	2.99654	0.76856	1.69022	1.03709	0.904696	1.11407	0.894659	0.94697	0.834655	1.04133	0.827987	1.17547	1.95924	0.991732	1.24021	1.43046	1.83839	1.37126	1.62271	1.15829	1.20146	1.03973	1.58249	1.35495	1.05728	1.20704	1.23686	3.05738	2.66451	0.825544	1.7487	1.83132	0.914328	2.77273
FANCI	3.40978	4.01961	4.37459	5.13063	2.99737	2.72724	4.00451	3.22073	5.08934	1.57828	3.32723	1.32505	1.12449	1.62039	0.90614	1.47168	1.61643	1.45682	1.45748	4.71881	3.60008	4.08295	4.10841	3.6399	4.05962	3.12301	4.95437	3.34083	3.40114	2.79176	3.97804	4.46553	3.87474	3.801	4.44956	4.73167	6.06823	1.61271	3.44234	4.56472	1.08606	4.99226
FARP1	0.154733	0.431192	0.367117	0.545654	0.26155	0.452379	0.35776	0.339059	0.218992	0.123544	0.17995	0.216076	0.195734	0.241089	0.188237	0.179456	0.157429	0.255019	0.0825866	0.214374	0.286098	0.240379	0.158761	0.271302	0.208353	0.0586642	0.123788	0.134184	0.294	0.1413	0.300937	0.29568	0.289271	0.366302	0.18664	0.0844401	0.154576	0.126239	0.186176	0.438944	0.192375	0.192469
FARSA	17.9903	18.9992	17.33	20.8937	16.2725	19.6619	14.088	17.1216	17.9629	18.8629	18.1949	16.3992	14.4564	18.0945	18.3061	15.9896	14.9561	18.2391	17.6211	21.0373	15.5445	20.0102	13.3412	14.8074	23.5792	15.7452	15.066	16.2109	16.1968	18.2084	16.6721	21.3277	14.7335	14.3497	19.926	19.6696	18.843	19.2745	18.8244	18.1474	18.8296	15.4566
FARSB	14.7931	13.4015	15.8557	16.2176	9.3143	14.06	12.6082	10.9042	9.88045	11.4672	10.9758	11.1832	13.8357	10.5246	11.3214	10.6252	9.49404	9.01626	9.03533	10.3154	13.1787	13.6314	11.7458	9.11903	14.0748	14.2776	10.7944	14.1113	13.2153	12.5997	9.94164	10.0364	11.6753	12.9093	10.7031	16.8094	16.661	11.4491	11.3555	16.3546	11.5703	14.8668
FASN	32.214	37.6996	38.0972	34.2188	33.8028	39.4855	34.801	35.6087	41.1623	18.8003	37.208	14.8607	20.6132	20.1895	20.2195	17.4564	18.1136	19.3556	18.7584	38.7617	41.342	40.5476	37.6562	39.2599	40.6323	37.7788	42.61	37.0921	36.8175	37.0536	33.4455	36.7801	34.6852	34.779	36.5895	37.4937	40.6261	19.2105	38.0619	33.2653	18.8509	37.6158
FASTKD2	0.365373	0.58636	0.507677	0.662306	0.166795	0.615171	0.45863	0.607949	0.626649	2.93524	0.284488	3.1605	1.62674	2.7667	1.9964	2.04491	2.481	1.95629	1.60213	0.467082	0.173512	0.216953	0.467653	0.28713	0.539458	0.547323	0.443015	0.375153	0.519584	0.350347	0.170891	0.459734	0.944132	0.469581	0.443724	0.498266	0.423264	2.99928	0.29433	0.106121	2.04029	0.379148
FAU	139.502	151.296	69.1886	65.6243	80.9688	158.729	107.329	141.605	117.837	116.968	143.933	86.4756	148.558	104.321	97.3312	82.3576	123.454	78.819	80.0951	144.017	126.167	132.121	154.817	151.821	115.744	221.865	153.216	174.28	149.55	147.917	82.9571	110.577	94.9686	109.892	125.529	58.0461	75.3289	119.52	148.913	61.3223	99.4709	51.2107
FBL	73.1962	76.7042	91.7348	75.9762	46.531	80.6674	69.5924	48.7445	51.7895	88.3103	76.1144	102.232	72.8996	95.7625	86.7773	101.312	94.3485	95.2064	56.8757	59.3065	58.1109	60.3809	68.4685	40.3571	65.1544	57.8407	60.1053	68.8189	58.669	44.7669	40.7765	69.5148	74.6218	71.254	53.9872	73.4522	94.2226	90.1489	77.5104	97.6082	78.2443	59.9286
FBXO22	3.28854	3.14064	2.5012	2.95727	1.54479	3.29495	3.74162	1.76943	2.06701	0.671832	3.58343	0.646335	0.60775	0.287648	0.241812	0.721447	1.14615	0.719707	0.244709	2.59689	2.25293	3.7239	2.79229	3.19514	1.37051	2.54478	2.08256	2.32452	3.2236	2.12452	1.58272	1.68814	1.93512	3.83096	2.39123	3.06957	3.94778	0.68649	3.70741	1.71776	0.247128	1.89028
FBXO7	1.62947	1.04805	0.246689	1.0989	0.959616	1.09955	1.46172	0.902089	1.12647	0.666378	1.46452	0.497583	0.882593	0.400288	0.481135	0.271921	0.626946	0.732523	0.623793	1.67786	1.45389	1.831	1.2079	0.697582	1.31113	2.06292	1.16257	0.767919	0.671966	0.532339	1.09516	1.02452	1.33391	1.2072	0.779279	1.00114	0.242615	0.680917	1.51519	0.369288	0.491712	0.577381
FDPS	12.9848	11.2769	14.7878	18.4761	9.87128	11.831	13.8109	9.71247	6.27742	7.70935	12.0724	7.95847	3.80508	8.56332	2.45211	5.03655	9.41196	5.13449	4.92738	9.80108	10.6854	9.3507	11.0152	10.0292	11.3189	9.58809	7.58318	13.7507	8.53026	9.55196	10.1137	15.3149	7.28131	14.1406	11.6501	17.7431	17.0544	7.87755	12.49	15.4549	2.50602	21.6552
FDXR	2.29213	2.4469	4.58627	5.02243	1.15775	2.73476	2.11263	1.47298	3.71247	4.23485	1.90485	5.28938	6.69756	5.4321	4.49391	5.11425	4.08409	4.57056	3.40977	2.85487	1.44173	2.08144	1.92833	1.44816	2.88968	1.65912	1.37938	0.859852	2.11941	1.82271	1.56129	3.04814	3.30095	2.16308	1.88336	4.42481	5.28857	4.24234	2.04984	3.09831	4.59271	3.72925
FECH	2.38662	1.81698	3.63466	2.12111	1.15812	1.90626	2.28063	3.05298	1.719	3.96814	3.655	3.28197	5.35298	3.33283	4.17834	5.66799	4.39512	2.65348	3.24799	2.71609	1.44224	2.28366	3.51724	2.31544	2.59894	2.894	2.90308	2.5961	2.31383	2.06922	1.18656	2.49555	2.65405	2.33508	2.35246	2.78555	3.30719	4.33975	3.78145	2.58815	4.27019	1.75993
FEN1	42.8298	35.5855	32.4545	25.9371	32.7106	37.334	37.1107	35.3464	34.6061	34.0773	35.7926	26.4337	17.4426	37.5273	23.0957	32.0956	27.8444	28.9177	34.6214	43.4163	27.2133	50.0713	37.6731	38.5009	51.7082	41.4336	45.7613	34.7976	35.2943	37.2995	33.3072	40.1527	49.7296	37.9968	40.5884	28.2968	36.4782	34.8208	36.7867	28.5763	23.3434	29.2078
FERMT2	2.33203	3.36591	1.99981	2.35487	3.3464	3.53129	4.09601	3.12805	3.71745	1.50208	3.57141	2.2264	2.02986	1.54036	2.19695	1.47653	2.15427	1.91248	1.61755	2.12332	2.99861	1.80897	2.51479	3.39884	2.53607	2.53576	3.54163	2.43137	2.55135	3.04874	3.42857	3.17095	2.95632	4.19381	2.39196	2.53984	2.06161	1.53485	3.69497	1.54448	1.79634	3.43784
FH	16.9063	16.1549	28.9403	24.852	12.7229	17.1455	16.4317	20.426	19.96	33.3333	19.7598	27.1222	22.5338	29.9626	29.7909	27.0256	26.2029	27.2516	37.1823	16.2624	11.1502	23.4706	14.8803	15.7934	20.0302	17.651	16.7987	11.8386	16.5859	15.6382	13.0353	19.8987	22.6729	16.824	16.9447	35.9066	35.5161	33.7797	20.4434	29.2281	30.4458	27.8727
FHL1	27.0124	21.4539	104.028	92.9762	45.3818	22.508	28.5626	26.8156	29.2496	4.35637	27.2408	10.8381	6.61891	8.0268	10.3558	7.20226	6.92055	10.6633	8.74571	24.9728	45.7899	23.6441	35.127	27.1793	24.8777	29.0184	22.6188	31.6319	25.0925	28.5925	46.7619	38.3981	23.932	29.2445	23.0737	93.5796	78.1875	4.45142	28.1833	112.219	10.5835	85.1031
FHOD1	0.826417	1.3025	0.798376	0.529969	0.707714	1.3665	1.41164	1.16987	1.47668	0.777194	1.48894	0.587611	0.378886	0.703416	0.526914	0.405262	0.716512	0.455123	0.623817	1.46871	0.922786	1.13846	1.3676	1.3651	1.50307	1.67904	1.48646	0.925442	0.822621	0.901792	0.725093	1.31645	1.59286	1.44534	1.30839	0.636902	1.00082	0.907591	1.5089	0.878489	0.425888	0.740899
FIP1L1	3.65618	7.69193	6.21011	7.2771	4.81525	8.06987	4.98875	8.57895	11.0631	5.90364	9.35406	3.22092	2.07092	6.13943	2.84696	5.55552	5.69145	5.00791	4.04595	6.2888	6.51504	7.02767	4.51549	5.61853	7.16688	7.21198	7.17895	4.81206	5.49513	6.22853	5.18718	8.63151	4.81572	5.35297	6.04101	6.0849	9.04582	5.93937	8.26363	6.42551	3.12863	3.25609
FKBP10	6.87768	7.01744	7.44539	7.92591	8.00467	7.36224	9.99711	7.8528	9.09122	14.5208	10.4165	16.374	13.513	13.2643	14.703	13.5856	16.8975	11.8225	17.9842	7.26813	8.35387	9.50187	8.05225	6.95184	9.09428	8.33821	6.78621	7.13563	7.41475	7.73578	8.20124	8.20876	7.38599	10.1246	9.19167	7.4567	8.06207	14.8376	10.278	8.02037	14.6867	8.08846
FKBP15	0.776822	0.356262	0.722472	0.700568	0.638417	0.483473	0.7371	0.444196	0.89541	0.539395	0.801641	0.755356	0.377594	0.706264	0.30212	0.458971	0.493311	0.562541	0.541394	0.552465	0.296924	0.50078	0.47361	0.431059	0.776357	0.71827	0.567656	0.375096	0.426602	0.538183	0.654094	1.04273	0.753006	0.754699	0.821322	0.45786	0.787263	0.591041	0.829375	0.463367	0.308762	0.281274
FKBP1A	163.123	158.37	292.74	213.602	179.157	166.152	174.941	139.606	53.9148	137.552	189.732	216.799	69.7968	178.014	135.243	185.804	176.938	156.611	171.577	93.0148	190.668	110.132	167.433	89.6192	163.614	133.492	82.7542	174.466	127.373	124.157	184.631	182.095	252.339	179.118	196.258	254.939	245.744	140.553	196.296	189.604	135.964	207.97
FKBP2	10.2041	10.8168	14.9227	8.30784	9.411	11.3483	14.5378	14.5805	15.1324	21.312	14.3187	18.9386	15.2276	10.7312	12.5659	3.76936	19.3906	18.3819	18.2257	13.4226	13.8542	12.6551	8.90762	17.9052	11.2927	19.0797	14.587	16.748	12.2233	1.17839	9.6421	7.16761	8.05603	14.8849	15.1855	18.6995	4.1371	21.777	14.8141	15.7018	12.8422	12.2255
FKBP3	71.0262	67.7125	61.054	74.2826	68.9858	70.8126	80.3383	49.4926	64.6481	45.3351	80.4868	46.3839	52.7533	49.0009	37.2778	56.8093	41.3634	33.2116	35.5131	55.2899	63.5189	57.3275	77.9394	55.2238	64.3918	91.0053	44.2431	79.242	61.1435	67.0254	70.6798	63.0973	59.0955	82.2565	65.9397	72.4102	78.3792	46.3243	83.2713	73.5184	38.0974	65.3819
FKBP4	41.6164	42.8719	62.7637	62.1524	42.4769	45.4836	57.1859	50.3158	37.7524	27.7853	55.441	29.7415	24.0951	26.6157	18.9498	28.7439	30.4938	25.8494	28.8551	44.5439	38.8567	43.8261	54.3363	44.8853	53.808	49.6737	49.1104	52.3567	46.8804	52.5314	43.7919	42.6969	44.985	58.1721	49.6797	64.7549	75.9295	28.3915	57.359	69.2777	19.3664	75.4024
FKBP5	4.59681	3.33735	3.03513	5.4444	5.90973	3.63849	5.53099	6.4397	7.80454	2.62981	5.03099	2.18006	0.747755	2.67983	2.05441	2.59234	1.70419	2.23111	3.01809	4.87438	4.75936	5.14628	4.90455	6.16416	4.81103	4.67222	4.84926	5.90942	4.6928	4.66697	6.05484	4.36974	4.4667	5.66305	4.93373	6.57733	7.26114	2.68719	5.20505	4.03399	2.09957	8.1115
FKBP8	8.54449	11.4682	10.3431	10.5041	7.82326	12.0317	10.0806	8.04686	9.15896	11.7184	13.3929	11.751	9.17627	13.4612	13.7403	16.3818	12.6564	12.0942	13.8398	9.46083	6.94322	8.24216	11.7257	7.15062	9.67088	8.93636	7.69451	11.6932	11.0925	11.4297	8.11445	11.1794	11.9185	10.3893	12.1884	10.5083	9.59141	11.974	13.8563	7.64134	13.5358	7.60781
FLAD1	0.620893	2.41212	1.92356	2.2934	1.0549	2.37944	1.85063	1.44017	2.89933	1.39574	2.17023	3.14384	3.36186	2.02879	1.56789	2.83234	2.65462	2.79931	2.5077	1.39646	1.58574	0.163091	1.01315	0.899476	1.28277	0.827756	1.34474	1.54102	1.10848	1.62421	1.0808	0.894076	0.54981	1.89482	1.76432	2.64731	2.23958	1.42619	1.86536	1.89249	1.75555	1.44585
FLII	22.6269	11.4551	8.67724	8.60185	9.12089	11.4061	11.3916	9.96211	9.59185	5.02093	9.88823	4.54594	5.26076	4.23657	5.54831	6.23928	7.38341	6.57537	6.22708	10.387	9.00242	12.9217	10.0912	11.0274	15.8918	10.654	8.61468	8.47255	12.6824	12.2737	9.75039	10.7236	8.4187	12.1694	13.4211	9.69056	11.9088	5.05932	12.2691	6.3188	5.43765	5.81771
FLNA	31.5053	37.4475	29.5798	29.137	31.5014	39.7551	41.5728	40.0272	58.5783	26.7996	45.6364	25.3705	26.2078	26.225	25.9499	29.2776	27.3117	27.4594	25.9598	40.4979	34.3206	39.7751	45.8616	42.9643	39.6906	39.0572	40.4099	40.588	39.8302	41.4415	32.1337	37.6708	40.5774	42.5521	43.2852	29.9631	31.496	26.6859	47.1164	31.9996	26.2873	29.9684
FLNB	114.687	146.86	99.9553	105.984	131.996	152.131	145.887	136.676	144.705	97.9525	158.156	94.9641	88.0541	104.916	94.0813	97.397	98.074	116.142	101.201	143.82	156.415	158.554	153.192	150.068	162.694	139.709	154.216	158.335	152.337	154.294	138.918	159.053	143.371	153.501	160.537	113.493	121.405	100.048	160.855	112.285	97.4146	119.57
FLNC	0.950992	1.10302	0.975976	0.879504	1.1531	1.17632	1.41512	1.25665	3.00584	0.690172	1.64479	1.0601	1.29741	0.934556	0.780469	0.78815	1.18608	1.09904	0.68241	1.49123	1.04575	1.80197	1.36829	1.48494	1.71266	1.2784	1.24281	1.30058	0.979173	1.40395	1.36037	1.30478	1.48415	1.54989	1.56585	0.744014	0.893	0.715177	1.62818	0.706457	0.797627	0.698488
FLOT1	5.13824	6.88263	7.60868	6.96918	5.45244	7.22081	5.05301	4.89967	5.42209	7.01849	4.47182	6.95376	6.69375	7.84946	6.73878	7.77541	8.12241	6.82341	5.24677	4.84136	4.90276	5.04751	5.37995	4.99739	6.02799	6.40522	5.07888	6.6828	6.83624	5.99752	5.58633	5.97228	6.06822	5.17366	5.47141	6.33535	7.6637	7.24191	4.21293	8.28229	7.45362	4.35624
FLOT2	6.6446	6.43401	4.54485	6.21516	4.57139	5.72554	5.61632	4.40831	5.94353	5.90177	6.27189	5.57847	5.91061	8.29882	7.38561	6.85779	7.02843	7.50314	6.37564	6.42255	6.02386	6.86849	4.37009	4.35227	6.77965	6.057	5.37687	4.55395	5.59184	5.19982	4.52274	8.36026	5.76132	5.75042	6.1315	6.39896	6.55741	5.88629	6.48888	4.96622	7.54798	5.79468
FLYWCH2	5.20185	7.14304	5.2607	3.91969	11.0947	7.49401	8.3601	6.16332	4.36279	4.93269	9.34773	2.15183	3.3246	5.19788	4.04698	2.76975	5.56021	4.36013	2.02693	8.30999	5.97333	7.46982	7.07554	4.98206	5.2838	4.94045	6.36635	7.8405	8.18947	7.16416	11.3671	7.64439	7.80669	8.5597	7.39806	5.55353	4.92855	5.04031	9.67113	6.41995	4.13595	5.9626
FMR1	4.22142	2.38325	6.18976	6.42649	2.35897	1.1744	2.54514	2.38586	3.78128	2.76615	3.01034	2.82385	1.31391	3.01512	1.75857	2.74477	3.62707	3.79608	2.75213	2.97183	3.74328	4.04208	5.58491	3.48068	4.01222	3.11349	2.6695	5.47651	1.8992	3.10076	4.73702	5.12846	3.90821	5.21183	6.24886	5.11789	5.34819	5.58347	6.22898	7.37309	3.34883	6.86953
FN3KRP	1.7411	1.67035	1.21422	1.05594	1.19395	1.75242	1.82964	1.32783	0.538275	0.248375	1.71034	0.20308	1.04795	0.859413	0.252306	0.125465	0.485837	0.383739	0.2762	1.13223	1.16272	1.15629	0.447712	0.802875	1.00937	1.089	0.466824	1.62489	1.22728	1.35253	0.870738	1.49369	0.572275	1.87333	1.39108	1.9858	1.63425	0.253795	1.76952	1.09564	0.257852	2.42648
FNBP4	0.920235	1.29294	1.27101	0.81772	1.14238	1.23291	1.93605	0.797214	0.707979	0.728053	1.57683	0.982328	1.0177	0.653566	0.86365	0.658626	0.813425	0.473966	0.379353	0.699364	1.07887	1.0368	1.05277	0.910094	1.22365	2.17996	1.04678	1.22512	1.81794	1.56573	0.991015	0.907683	0.580369	1.98227	1.82584	0.606088	0.497054	0.743938	1.63139	0.321898	0.681734	0.465117
FNDC3A	1.09128	1.37003	1.18369	1.20656	1.23256	1.43734	1.09274	1.44523	1.42192	1.82909	1.08315	1.55617	1.95801	1.91285	1.70068	1.29556	2.27565	1.65838	1.17178	1.0274	1.52103	0.911177	0.810744	1.00304	1.17813	1.13598	1.6083	1.10033	1.1219	1.18496	1.26283	1.76306	1.69812	1.11884	1.04052	1.79278	1.39578	1.81687	1.13477	0.395814	1.73807	0.694794
FOXC1	1.39953	3.122	3.89438	4.86951	0.857065	3.27539	1.67445	1.66991	2.05771	4.62057	2.8407	3.52774	3.02344	4.86004	3.73031	3.41099	1.57737	4.52694	4.7182	1.66625	3.41444	3.67301	0.577473	1.24048	1.11983	1.4047	0.968402	0.930092	1.55097	0.998249	0.878111	2.66042	2.47984	1.9456	2.61498	4.27547	3.16691	4.72138	2.93898	2.41488	3.81231	2.58014
FOXK1	3.52945	3.15844	2.44257	2.54707	2.11631	3.16719	1.4007	2.8784	2.9474	2.33892	2.63177	3.85669	1.66826	4.60831	1.75232	2.25062	2.00559	3.4527	1.55073	0.572107	1.89463	1.22776	1.15017	1.01507	3.93286	1.44378	3.68743	2.19015	1.70123	1.55707	2.20883	4.16093	1.73622	1.43414	2.13935	1.61587	2.7595	2.38995	2.81263	3.02135	1.66231	1.36924
FSCN1	11.6293	11.2322	15.7042	12.6919	16.5229	12.1283	9.70617	12.144	9.98737	11.2154	13.579	15.1713	7.14211	12.0169	12.7973	14.6351	10.7007	14.4566	14.9656	10.21	15.266	10.1034	12.2532	9.33767	8.70834	10.0108	8.61542	11.4339	11.3539	10.9469	16.3487	13.1071	16.5979	11.1684	12.2348	12.2583	14.7061	11.4601	12.9274	14.0346	13.0786	17.3617
FTO	2.78867	2.85095	7.99559	8.37546	3.41529	2.99103	5.20715	3.26552	3.87081	1.03887	4.89653	1.73762	0.990196	1.49219	0.780349	1.60923	1.76788	1.6073	1.33658	3.26689	2.62846	3.72957	3.50748	3.13025	3.57925	4.444	3.12666	5.13243	3.42755	3.43264	3.22304	3.49791	3.7607	5.33148	4.96976	7.7319	7.63471	1.06154	5.17618	5.93593	0.797504	5.21059
FTSJ3	13.0759	12.5829	6.59939	7.1573	10.6517	14.3546	13.7679	9.77572	12.7093	16.4835	14.0865	14.618	20.2208	17.7684	13.1021	15.1373	11.8758	18.8627	17.152	13.797	11.1421	13.2211	16.1148	17.458	14.7383	13.5095	16.1425	12.701	13.3116	10.5145	10.5645	14.9775	13.243	11.9874	9.82226	6.94317	8.01501	16.8432	14.5738	6.52216	12.9072	5.77643
FTSJD2	0.964292	0.669465	1.98242	2.58364	0.981131	0.702359	0.625743	1.00549	0.512574	0.302157	1.17547	0.803832	0.118694	0.361522	0.168269	0.371074	0.488639	0.524811	0.525159	0.60581	1.2483	0.597969	0.592568	1.06112	0.992865	0.998991	1.06599	1.17972	0.961498	1.49938	1.00522	1.73	1.03099	0.640683	1.05777	2.36629	3.24471	0.30875	1.21614	1.63257	0.171969	2.14564
FUBP1	31.5151	31.0682	45.1237	34.3687	38.3772	32.5947	44.6393	41.0486	31.5071	42.4241	50.2815	43.4698	38.3571	40.6638	40.9621	39.1718	47.7306	50.5331	43.917	28.9642	42.0347	34.4776	43.8675	28.7661	40.5292	29.9491	24.1936	36.9308	34.21	36.6207	39.4286	36.7119	44.8782	45.5757	49.8872	35.4707	34.737	43.3497	51.0574	40.906	41.8626	34.2167
FUBP3	10.5109	14.2046	16.3716	15.4069	13.3781	14.9025	15.1577	15.8523	15.4263	20.5148	16.4878	24.8512	18.3151	24.9115	19.725	24.5221	23.7367	25.9769	21.7166	15.1963	17.9852	15.3297	17.3195	17.9406	16.1514	13.0734	19.7557	16.5595	15.7659	15.5501	13.7066	15.31	16.3095	14.6916	15.9745	13.2539	16.0175	20.9624	17.0582	20.2139	20.1586	11.9798
FUCA2	0.16723	0.258947	0.138584	0.226489	0.537366	0.271671	0.609373	0.399615	1.29745	0.243483	0.161802	0.428354	0.184095	0.284966	0.203094	0.166478	0.411085	0.161425	0.185912	0.434624	0.291972	0.219573	0.70816	0.188865	0.4279	0.663868	0.227733	0.271074	0.212318	0.408119	0.406106	0.27472	0.391426	0.623922	0.445525	0.528907	0.225115	0.248795	0.1674	0.499536	0.207559	0.229677
FUS	82.2536	75.3658	56.9861	73.1084	127.709	79.0688	76.2255	81.4942	81.2995	132.415	76.5257	141.823	87.857	158.409	188.434	172.567	124.125	219.91	262.698	59.4842	118.794	78.9912	86.971	90.5375	101.393	86.548	73.7504	104.19	83.6165	83.1329	130.945	177.315	114.999	78.0455	69.0168	80.6725	63.0692	139.002	79.1732	63.2897	191.792	120.809
FXN	5.97027	4.52369	5.54603	5.61353	5.05888	5.55628	11.6876	2.68181	4.654	12.204	6.30821	6.87642	2.60753	9.96399	9.09166	9.34437	8.4452	9.40458	10.7176	6.05768	2.12533	7.11693	9.49374	5.73414	7.61917	8.38475	4.53149	9.63229	9.30418	8.46481	5.18311	6.23581	8.99843	11.9667	2.63089	5.75565	8.88371	12.4703	6.52646	5.97641	9.29153	5.11213
FXR2	4.08705	2.25187	3.41234	3.377	2.27704	2.36251	3.1651	3.35239	2.88105	3.55026	4.90798	3.04834	1.09252	2.9653	2.37996	3.83971	3.04141	3.70298	4.64298	2.29847	4.32469	2.03389	2.44597	2.33766	2.95564	2.68093	3.37587	3.02351	2.58948	2.81301	2.03794	2.87555	3.53545	3.24067	4.78066	2.60445	3.60418	3.62772	5.07778	2.86375	2.54322	2.89241
FYCO1	0.359355	0.276228	0.326248	0.237647	0.285164	0.2898	0.222941	0.401352	0.642474	0.165692	0.475536	0.12054	0.147392	0.163489	0.270354	0.18958	0.20512	0.127446	0.199161	0.263354	0.476503	0.341105	0.419491	0.292616	0.37493	0.319725	0.343539	0.245756	0.272115	0.199347	0.38275	0.658929	0.551614	0.228264	0.546246	0.21406	0.315545	0.151317	0.491988	0.231511	0.276297	0.165912
G3BP1	25.0678	28.9541	24.3204	30.2682	25.8649	29.1292	38.8612	30.8048	33.0521	54.7648	35.4521	60.8479	51.5827	57.0615	62.3275	48.7725	63.1413	51.4686	63.6756	28.5963	28.227	24.2047	25.742	23.9901	32.5012	33.0208	30.0159	30.5748	28.5302	33.3307	26.5	29.3978	27.7925	39.4687	34.372	29.3543	33.9645	55.9597	34.9635	28.1682	58.934	35.241
G3BP2	33.3711	53.5821	47.8209	51.6529	28.9107	24.3697	22.4643	21.5376	14.0179	29.4243	19.4408	37.4959	36.0924	26.8607	21.9358	33.3495	37.1474	32.7806	30.9049	11.6547	31.1862	8.36379	15.4731	5.6958	13.1332	15.1638	12.8099	27.6722	24.6417	23.4471	27.4501	18.7983	22.7453	23.0007	20.0261	15.2021	18.6951	29.0591	20.1134	19.9454	21.4899	27.0687
G6PC3	1.06413	1.47675	1.62118	1.67302	0.85744	1.5493	1.26884	1.15359	1.46754	2.20639	1.57101	2.76295	1.81794	2.3078	0.629656	0.607513	1.60388	2.16958	2.09864	0.875838	1.22106	0.860772	1.23056	1.44906	1.00747	1.46313	1.73069	1.57774	1.55794	1.64078	0.878495	1.46806	0.969505	1.29914	1.50917	1.81117	1.65431	2.25453	1.62536	1.67984	0.643499	1.24775
G6PD	5.58057	6.06903	13.9898	15.1787	7.61486	6.13904	6.10135	6.02197	5.0806	3.82575	6.923	5.43795	3.45756	4.01423	4.57034	5.00267	4.44626	5.26705	5.2046	5.57432	7.18193	4.44235	6.09766	4.34224	6.71511	5.34827	6.40157	6.54103	6.8128	5.46152	7.80185	6.33249	5.8152	6.35506	6.37032	13.3712	14.0416	3.65757	7.10556	12.1294	4.14939	11.09
GAA	2.99616	2.95516	7.69801	6.89756	3.62999	3.10036	3.71901	4.27278	3.94598	2.96596	4.72815	3.18062	2.63816	2.4263	2.66911	2.34216	1.97575	2.71814	2.09954	1.95529	2.59433	3.31795	2.92069	2.56535	3.19718	3.45868	4.12406	3.0385	3.36341	3.54597	3.71913	3.52294	3.47647	2.80406	3.92042	8.99249	10.0829	2.52339	3.6932	7.79827	2.06114	5.6337
GABPA	2.81229	1.91773	2.8415	2.24245	1.97253	2.01195	2.30794	2.66157	2.90537	1.12313	2.74218	1.90618	0.441355	2.663	0.984353	2.71978	2.45551	2.37005	2.09228	1.90171	1.90648	2.45201	2.66237	0.46417	1.53334	2.96772	2.96015	1.92103	2.24194	2.41377	2.02097	4.57241	3.02634	2.59786	3.08935	3.26405	3.00712	1.14763	2.31811	0.605426	0.514203	2.98085
GADD45GIP1	7.30364	3.91038	4.45747	2.91239	3.92887	4.52354	7.12148	5.65686	9.10346	12.5846	9.16549	13.2228	6.66113	13.1666	9.33783	12.4535	15.1013	11.6185	16.9562	4.93594	6.47625	7.49234	5.142	4.31354	7.16276	8.35834	7.19798	5.44102	5.67009	6.93808	4.02535	7.93494	5.57121	7.29151	8.39895	3.7815	3.30499	12.8592	9.48259	3.82356	8.37868	3.46304
GALK1	6.17875	6.18734	5.33702	6.35502	5.83086	6.23069	5.8045	5.6233	5.00878	1.97378	5.95665	1.28651	1.73879	1.55637	1.17896	0.771347	1.50287	2.43732	1.37688	6.80994	3.50913	7.77064	5.60679	7.26447	6.87665	5.41101	8.3536	3.68852	6.41859	6.64213	5.97404	6.80413	6.23021	5.94309	5.10439	6.09637	7.77257	2.35966	7.32028	3.70612	1.20488	5.58592
GALNT2	1.80256	1.40456	3.36389	3.17667	2.97953	1.47358	2.35956	1.99554	4.07509	6.92496	2.94922	8.09176	5.15181	6.69451	5.43296	7.66738	6.89387	6.99047	6.19143	2.1124	32.204	2.08177	2.33355	2.61451	2.93747	2.79544	3.19749	3.02256	3.25815	2.60384	3.05269	2.24647	2.88262	2.4159	2.92596	2.94899	4.86331	7.07605	2.9958	2.13906	5.5524	3.14787
GALNT7	0.374881	0.208492	0.324988	0.329593	0.469561	0.218736	0.848328	0.324022	0.302673	1.66821	0.627139	1.58893	0.892196	1.36077	0.860098	1.17427	1.58573	1.84897	1.28632	0.150144	0.068301	0.243466	0.449092	0.0776763	0.651158	0.447301	0.240429	0.594339	0.253288	0.665689	0.552489	0.629697	0.345772	0.868583	0.779648	0.0747991	0.59318	1.66314	0.648836	0.341272	0.879006	0.19956
GANAB	144.754	131.84	243.956	308.86	102.233	69.8265	74.9991	74.4508	79.7725	92.5381	75.3661	87.2786	101.371	106.885	97.159	96.9256	92.5823	102.435	115.507	80.9895	99.9118	69.2822	72.178	69.3184	77.2658	91.5265	86.6974	88.4448	74.9167	72.2384	105.259	75.6415	65.0672	77.0702	75.524	155.388	161.667	94.5571	77.9736	163.11	93.154	157.704
GAPDH	483.763	656.69	556.479	396.457	421.216	688.956	515.731	548.684	547.946	509.81	503.694	346.889	556.457	378.459	499.282	421.378	390.763	441.676	508.23	629.971	503.837	635.894	487.443	596.596	453.51	568.551	619.588	485.647	481.573	541.725	431.682	517.715	574.139	506.687	584.876	664.267	397.423	522.955	521.12	583.494	471.093	560.507
GAPVD1	3.57473	4.19218	3.40009	2.9366	3.33988	4.42787	5.08745	3.90194	3.99446	2.24683	4.15766	1.68198	1.60013	2.3498	1.63829	1.98265	2.2541	2.87781	2.50672	4.79002	3.49455	5.30762	4.55655	4.32691	4.81631	3.95042	3.50603	3.7762	4.20525	4.38598	3.31836	4.07276	4.60377	5.20892	4.56154	3.32002	3.63239	2.25902	4.20383	2.27163	1.59149	2.30752
GAR1	21.4139	12.7	4.6898	7.35072	6.40464	13.324	11.9729	1.77154	20.2792	13.1401	14.8565	9.98549	3.89466	14.4343	11.7403	11.7395	12.0755	13.7865	12.2481	19.1906	17.4191	27.0312	12.4233	6.14823	29.2459	15.6417	15.7829	7.33567	12.2889	13.5121	6.56191	20.6063	20.0169	12.2587	13.7949	2.82341	6.30703	13.4268	15.3705	8.58759	11.9984	7.68676
GARS	22.2725	19.9409	31.4404	32.1532	22.7381	20.7627	18.0533	19.1222	26.633	13.5106	15.4437	13.3624	13.0025	15.4885	18.1756	14.9432	13.5758	17.5135	14.4361	15.7475	26.3808	17.1487	14.075	11.0564	18.1455	17.8202	19.3752	19.0376	20.2269	22.6029	23.3487	23.1624	19.8271	18.4843	20.1251	31.3819	35.9205	13.3731	15.978	33.2119	18.5752	31.3252
GART	46.7003	55.1034	51.9036	49.7886	49.1315	57.7569	47.6216	48.6458	58.3914	21.212	44.4911	19.9936	28.9827	22.9345	27.5343	19.7464	20.2184	22.9456	18.2779	45.6127	53.67	41.0364	33.3718	46.0316	42.3933	48.0215	53.6123	47.4412	54.5978	52.4901	49.8357	44.0447	30.3274	48.7586	41.4817	57.1625	61.0361	21.6748	46.065	47.2732	27.725	47.565
GATAD2A	3.54141	3.57481	2.67981	2.42411	5.90088	3.64213	3.25911	3.43167	2.36009	2.18682	3.06134	2.26437	1.79707	3.0669	2.33577	2.18213	3.62691	3.59515	2.41127	2.43012	4.76351	3.7913	3.7037	3.40454	3.41887	3.0702	3.15775	3.27573	2.84229	2.89683	6.04578	4.06455	4.5957	3.33692	3.01929	3.2736	2.51849	2.23453	3.16726	4.1947	1.90773	3.37388
GATAD2B	6.99245	8.01962	6.94252	6.33304	4.25144	8.41366	9.194	10.3071	10.6525	4.83527	10.8341	3.01288	5.23476	5.17008	2.63029	5.56546	4.68286	3.97449	3.60271	9.90125	5.96208	6.76088	12.496	10.1881	9.21705	9.38967	12.2252	8.35008	8.05462	8.19071	4.35584	8.60321	9.3236	9.7255	7.77172	6.3085	6.45481	4.94077	11.7529	7.10004	3.70328	5.16226
GATC	2.13531	2.60668	1.15547	1.34135	1.19096	2.73476	3.43464	4.24537	3.08884	9.06918	3.81211	7.57934	11.722	8.77447	8.60744	9.56593	9.94625	6.95349	7.7256	3.95885	1.30734	3.46495	3.52061	2.83866	2.20707	3.60821	2.39525	2.40442	1.88234	1.51286	1.2202	3.30454	1.69255	3.51665	4.09982	1.19934	1.86788	7.40556	3.944	0.458296	8.79667	0.88673
GBA	0.974113	1.12844	2.63343	2.12372	1.3606	1.18389	1.65152	1.27132	3.52565	2.57448	1.73414	4.57841	2.74677	3.42082	4.85444	3.76912	3.97882	3.44569	3.79973	1.17073	1.63618	0.936355	0.482832	0.551569	0.836091	1.18641	0.767567	1.14736	1.48434	1.53686	1.29685	1.24233	0.976542	1.69095	0.842518	3.50321	3.56528	2.77659	1.3618	3.15881	5.02369	2.56867
GBAS	4.44881	4.55584	7.57318	8.82424	3.74304	4.77969	4.17454	5.14788	4.65391	2.89336	4.2901	1.93366	3.79283	3.47237	2.25825	5.77675	1.14686	4.16699	3.55058	2.788	3.69467	3.14727	2.31016	3.88785	3.25927	2.67884	3.93588	4.21082	3.78284	3.90173	3.05231	4.29908	3.84674	3.08285	2.80766	8.65341	9.54491	2.95649	4.43852	9.21552	2.3079	10.1307
GBF1	1.40512	1.11869	1.30964	1.29347	0.942375	1.17366	1.20985	1.16953	1.18498	1.19471	1.04987	1.0408	0.770255	1.01646	0.676927	0.827295	1.00299	1.21069	0.774314	1.09258	0.77681	1.32917	1.38266	1.51615	1.60522	1.13279	1.39058	1.4199	1.46516	1.32038	0.930492	1.57949	1.26401	1.28437	1.38982	1.00842	1.94557	1.26504	1.11205	0.810879	0.691808	0.98651
GCA	2.66311	2.22091	2.79357	3.69138	1.39508	2.33004	2.93519	3.60228	3.85906	0.797916	1.63808	0.47173	1.07675	0.663191	0.684284	0.492997	0.640804	0.260534	0.160474	2.35192	2.15389	2.7807	2.66927	1.28293	2.64596	3.40639	2.83413	2.64032	2.16389	2.23825	1.42934	2.06478	1.75331	3.00527	3.25548	3.13819	4.62583	0.815325	3.02566	3.74527	0.699328	3.55057
GCC2	4.77147	0.238906	0.239649	0.147537	0.144126	0.250645	0.356593	0.276826	0.37563	0.306633	0.484718	0.582129	0.187969	0.430683	0.0697771	0.308366	0.618975	0.325491	0.297468	0.378481	0.330568	0.374375	0.200625	0.246173	0.307621	0.259524	0.233101	0.144937	0.16316	0.0856634	0.188211	0.373996	0.257952	0.365107	0.466299	0.15701	0.0553024	0.313323	0.501487	0.121472	0.0713111	0.08303
GCDH	2.28625	1.03713	5.72813	3.65419	2.44076	1.08809	2.23063	1.58717	0.749889	5.31977	2.74022	2.6181	2.96449	6.20097	5.62463	4.14165	6.26543	3.69852	3.85081	0.944531	1.6143	1.83317	2.87761	3.20399	2.46368	1.00584	2.51731	2.08709	1.77107	2.29807	2.50069	2.33732	0.448663	1.0225	3.41876	5.57364	3.6174	5.43584	1.88329	4.70185	5.74828	4.56255
GCFC1	1.61888	1.25996	1.2351	1.42035	0.872583	1.43596	1.45556	1.13697	2.05787	1.67354	1.08202	2.02765	1.22719	1.5103	1.02637	1.36874	1.94229	1.33631	1.41163	0.831838	1.80743	0.632874	0.593191	0.630593	1.27453	0.875597	0.394021	0.949242	0.961657	0.77529	0.664647	1.20077	0.967867	1.49031	1.11286	1.59003	0.990801	1.60315	1.11945	1.66471	1.04894	1.28515
GCFC2	0.709291	1.06798	1.53156	1.71336	1.06187	1.04976	1.46448	1.34681	1.42632	0.327023	1.57981	0.865699	0.420857	0.517301	0.289038	0.532272	0.461293	0.723979	0.540945	1.52649	1.27959	1.508	0.947187	1.1196	1.76212	1.10994	0.929749	0.950551	1.0489	1.24903	1.08794	1.36257	0.92232	1.49944	1.41468	1.4041	1.36272	0.334158	1.70065	0.991864	0.295393	1.33203
GCLC	0.817949	0.5923	0.632193	0.626104	0.498099	0.621402	0.718607	0.621105	1.31981	0.157986	0.897946	0.304035	0.348173	0.334553	0.106301	0.556004	0.40957	0.25	0.184769	1.08795	0.826535	0.895811	0.926387	0.974665	0.839041	1.15441	0.800795	0.429072	0.67008	0.817851	0.510331	0.573824	0.787552	0.735764	0.876039	0.378632	0.757311	0.161433	0.929012	0.407636	0.108637	0.212695
GCLM	6.41064	6.62653	7.42883	5.76116	5.85815	8.95467	6.20167	7.54681	5.16826	3.71531	6.58258	4.45506	1.06758	4.55706	3.79522	3.00854	4.73392	2.89694	5.139	5.67085	8.26637	6.9042	3.20071	3.8961	6.9627	7.10506	5.93368	6.75018	6.50637	6.34954	6.002	6.53477	6.52156	6.34975	6.11054	8.354	7.36781	3.79637	6.81031	5.06898	4.05605	6.32953
GCN1L1	8.23653	8.20032	10.0082	9.08936	7.60212	8.96445	9.26937	8.66751	9.1206	7.17009	10.2513	4.45569	4.97515	4.26618	4.87155	3.98987	3.55296	4.31818	3.61772	9.14423	8.92181	9.40342	6.47209	7.03933	9.38155	9.10602	8.42273	8.21306	9.01244	7.60552	7.52727	9.77944	7.91718	9.36539	7.86274	10.5219	10.6482	7.23264	8.98964	8.56	4.77805	8.66062
GCSH	6.38055	5.51464	9.66866	3.85983	8.46271	6.65623	12.8611	14.0045	18.0829	25.1628	17.4559	22.8839	11.9909	23.6709	12.408	24.4526	19.5318	25.0396	22.2249	7.99842	9.68177	18.5019	9.98731	11.6038	23.7878	12.9843	12.0333	11.6742	13.5035	15.2209	8.67051	19.1525	5.88285	13.1681	15.6132	8.07817	9.91981	17.66	18.0598	8.21	12.6808	6.28572
GDI1	17.954	12.9832	19.5852	16.4543	13.5475	13.6211	18.9399	18.3623	17.8617	9.28143	23.362	5.77967	3.66899	8.57685	6.64876	8.31823	8.28893	8.80584	6.76373	15.3922	12.3625	15.1482	15.3945	18.7251	20.6781	19.1417	18.2682	16.7396	17.3802	18.2019	13.3433	18.0026	14.9566	19.3921	22.5702	17.3509	19.0612	9.48394	24.1703	18.2587	6.79493	14.9733
GDI2	82.1115	81.4224	120.156	130.52	78.8683	85.423	92.4359	100.159	118.606	70.3835	101.339	57.4056	55.4388	62.8363	58.0314	55.9643	63.4246	68.9062	59.8347	51.5963	42.4266	51.8516	46.7905	43.1157	44.39	46.4242	44.2035	42.6889	39.4708	45.0208	39.2473	41.4787	37.2474	45.5931	47.7845	64.2189	76.5003	35.7758	50.4649	64.849	29.1571	57.2566
GEMIN2	4.77951	1.4299	3.05791	3.31322	3.45667	1.50016	3.13463	2.88372	6.89852	2.44368	3.0578	3.84601	1.51094	3.78752	3.16561	2.86517	3.12901	4.36587	3.66072	2.77373	2.09485	3.78129	2.51496	4.70836	2.98024	2.89034	4.4132	1.89696	3.7465	3.4834	3.30123	3.48682	5.47484	3.20947	1.48947	2.94335	2.54384	2.497	3.16359	3.19774	3.2352	2.17726
GEMIN4	1.8796	2.53199	3.25426	3.13317	1.74749	2.62217	2.41978	1.97733	3.03196	1.44733	1.94155	2.61055	1.81711	1.94253	2.05759	1.77661	1.46775	1.98147	1.71553	1.74698	2.51513	1.44543	1.92211	2.19472	1.20562	2.72799	2.16958	2.21482	2.08306	1.54761	1.73341	2.09031	1.61683	2.4042	2.08351	2.15043	3.16481	1.47891	2.07426	2.52654	2.56283	2.31745
GEMIN5	2.58353	2.4273	3.93733	3.61907	2.64046	2.36427	3.37013	3.24755	4.18283	2.13516	4.1526	2.88103	1.85122	2.21928	1.74256	2.28167	2.42078	2.87844	2.70554	3.11103	3.17392	3.02897	3.52953	3.09879	3.68064	2.68276	3.05038	2.63786	2.07572	2.05132	2.77358	2.96007	3.58945	3.24266	3.59311	4.07499	3.17881	2.18175	4.29626	3.99328	1.78087	3.67351
GEMIN6	1.74846	4.88974	5.73209	6.11496	5.98042	5.12999	3.10756	3.95583	0.779418	3.89259	3.29698	3.28662	2.65472	5.55278	2.47196	4.4689	4.83028	6.10077	2.49449	3.29627	7.82066	3.32913	4.75142	3.2093	0.241086	2.94053	2.96072	2.80791	2.15774	2.51786	6.12727	2.45983	4.67829	3.18176	3.05638	5.8836	1.50929	3.97752	3.41105	7.10939	2.5263	7.54051
GEMIN7	2.45523	6.581	3.99259	6.27679	6.61814	6.90435	9.40632	11.0509	8.16324	4.92398	7.98857	4.97187	1.86463	6.14288	5.13602	7.54188	7.2412	5.5487	9.28253	10.507	8.89122	2.69778	5.07586	3.09054	3.83238	8.0496	11.679	6.13299	9.30219	9.26605	6.78065	3.31464	3.17432	9.63091	12.8647	5.57747	7.26786	5.03141	8.26494	4.32115	5.24893	2.00328
GET4	4.23309	3.58437	1.65301	2.8327	3.22181	4.01262	2.2521	3.92328	4.09648	1.53762	2.48838	2.09216	1.1679	3.22875	2.55979	2.87722	2.24132	1.54201	1.39483	5.44183	1.77583	4.57816	4.98583	5.92035	5.13874	5.11142	3.13137	4.47557	4.03327	2.80238	2.90868	4.04891	1.84219	2.54692	4.34338	2.24662	3.83703	1.57117	2.57447	2.32646	2.61606	2.90045
GFM1	3.24316	3.41861	7.656	5.54845	2.69459	3.58658	3.46341	4.04523	8.31505	13.4588	4.48834	15.5259	14.8612	15.5652	15.4289	13.106	13.1543	13.1998	10.4818	3.00946	3.32431	2.26397	4.47527	4.298	4.94333	3.57371	3.47005	3.6424	2.85341	1.96356	2.77151	2.62915	3.63419	3.49823	3.91862	4.57888	5.64275	13.3643	4.77422	6.37646	15.6628	5.32838
GFM2	1.0851	0.349581	1.7243	1.94767	0.537148	0.730218	1.0613	1.44321	2.21718	1.47179	1.27051	1.19144	1.29482	1.87167	1.69015	1.524	1.81184	1.25469	1.21306	0.465837	0.729566	0.923507	0.929315	0.881898	1.08366	1.12474	1.17146	0.932464	0.847683	0.765707	0.581421	1.11794	0.743654	1.08664	1.55932	1.52223	1.99218	1.5039	1.31447	1.21483	1.72731	1.28858
GFPT1	5.17793	5.30885	5.7344	5.70229	5.93956	5.72517	5.30796	4.45259	6.26804	3.31441	5.45975	3.17396	2.3206	3.42721	2.91856	4.09459	3.55675	3.39736	2.76436	4.70426	5.2639	6.01807	6.58888	5.64016	6.88605	4.7747	5.40795	6.12008	5.10727	5.68584	6.08541	5.82048	5.12024	5.34874	5.87509	6.20931	5.43734	3.38672	5.3187	6.85659	2.64621	5.49803
GGA2	0.601536	1.04021	1.18576	1.34327	1.042	1.09132	1.25037	0.848955	2.49386	1.48244	1.61904	1.36032	1.30645	1.71394	1.69585	1.52934	2.22269	0.964753	1.1438	0.797562	1.15199	0.747148	0.592484	1.03696	0.476968	0.595295	0.359927	0.98403	0.6106	0.430413	1.06759	1.18761	1.12463	1.28022	1.04068	1.58948	1.6185	1.69116	1.67505	1.44116	1.73313	1.49453
GGCT	8.92958	5.47771	10.6028	8.12571	6.98411	5.74686	6.43807	6.79316	6.80613	3.29361	5.69184	3.28732	1.49473	2.88828	2.03774	0.960232	2.24976	4.02097	2.87842	6.31189	5.23575	5.5045	7.81598	5.96754	5.64926	6.74089	5.54621	5.78112	3.30164	5.31808	7.15561	5.94329	3.36041	6.59178	6.05028	12.0644	10.3729	3.36548	5.88876	9.03835	2.08254	10.9003
GGH	8.55478	7.39042	13.9318	18.0888	9.95974	7.68057	10.3423	7.2507	13.5401	3.55011	9.39265	3.74472	4.61305	4.64858	5.86191	3.626	7.10451	4.28432	3.72794	7.95267	12.0982	8.71584	9.54187	5.91464	8.30449	12.7914	6.20586	8.10754	7.11507	7.58446	10.2043	7.03659	8.82469	10.5893	8.44393	23.0969	14.8229	3.62757	9.71761	15.7829	4.42036	13.9219
GGPS1	0.584344	1.05666	3.84078	2.40928	1.47544	1.10857	1.10749	0.96644	1.05334	0.425773	1.06291	1.04099	0.423208	0.18867	0.508021	0.221528	0.362857	0.700833	0.343979	0.916886	0.57486	1.05979	1.12619	0.983946	0.991924	1.12393	1.05256	1.29737	1.00201	1.14954	1.51168	1.12051	1.22342	1.13394	0.742208	2.36802	1.24272	0.435063	1.09968	2.66389	0.51919	2.09235
GID8	3.31108	1.83825	3.4941	5.20617	2.16556	1.92857	4.00038	3.50091	9.28302	4.404	3.03983	3.88065	2.91714	5.08577	2.09377	2.5266	4.31904	4.08442	3.03922	2.61829	3.99697	2.53743	2.89056	2.09817	3.43665	2.24176	3.93588	1.72263	2.46119	1.62791	2.21874	2.95353	2.64385	3.9292	3.23715	6.24334	6.90222	3.82019	3.145	3.14235	2.1398	6.22989
GIGYF2	1.96291	2.36372	2.00626	2.2237	2.48829	2.3827	3.04532	2.80663	4.07207	2.90682	4.43475	3.46455	1.95205	3.08192	3.01813	3.47656	3.63757	3.1444	3.76612	3.3409	1.72186	2.89015	2.77512	2.56044	3.42815	2.66499	2.92643	2.53385	2.23141	2.03794	2.54939	3.59588	2.44969	2.91707	3.03699	2.33844	1.9902	2.71285	4.67923	2.36305	3.08448	1.61287
GINS1	1.63339	1.76093	2.95473	2.85898	1.15677	1.84745	2.47188	1.13411	2.06766	0.945843	1.91384	1.04847	0.694756	0.978214	0.75821	1.10352	1.46159	1.30691	0.874245	1.64792	0.838101	1.48589	1.52863	2.35162	2.19148	0.938	2.2487	1.47636	1.46865	1.46382	1.18518	1.70051	1.63499	1.99879	1.76758	3.74082	3.3743	0.96648	1.98005	1.56328	0.774879	1.20882
GINS2	5.55264	5.85069	10.0538	7.82371	4.31921	6.13816	5.64841	5.02896	4.48546	3.42111	4.64697	3.58936	4.4599	6.55452	3.47997	4.89755	3.57238	4.60964	5.58592	4.15374	5.16344	7.04435	4.54392	2.82313	8.04633	4.92371	1.46435	4.49246	5.0606	4.29862	4.42527	6.01701	7.26707	5.09392	5.01242	9.27151	8.39575	4.46157	4.80774	7.95453	5.05922	7.70799
GINS3	7.16672	4.70152	7.4868	3.13847	5.09636	5.4877	8.73774	8.61859	9.94982	4.1547	9.00794	5.81003	5.57285	6.22885	2.80782	3.93424	3.41604	4.90334	3.65321	8.24228	3.44675	8.57719	8.29609	8.22281	9.74121	6.33124	7.43871	5.63612	6.81638	7.58663	5.22151	7.65627	7.63046	8.94637	6.51907	6.62902	8.99523	4.24535	9.31958	5.43667	2.86954	5.42757
[truncated: 2,327 more rows]

## Sheet: 3b
Symbol	1(001)	1(010)	1(100)	1(101)	1(102)	1(103)	1(104)	1(105)	1(106)	1(107)	1(108)	1(109)	1(011)	1(110)	1(111)	1(112)	1(113)	1(114)	1(012)	1(013)	1(014)	1(015)	1(016)	1(017)	1(018)	1(019)	1(002)	1(020)	1(021)	1(022)	1(023)	1(024)	1(025)	1(026)	1(027)	1(028)	1(029)	1(003)	1(030)	1(031)	1(032)	1(033)	1(034)	1(035)	1(036)	1(037)	1(038)	1(039)	1(004)
[truncated: 9,741 more rows]
[truncated: 707 more columns]

[truncated: 1 more sheets: 3c]
