# Supplementary material for: Integrative proteogenomic characterization of early esophageal cancer
Source: Research Square preprint supplement (doi:10.21203/rs.3.rs-227745/v2), 2021-10-12
Supplement: Supplementary file 2 [file 244c314f2375132843c8d353.xlsx]

## Sheet: Description
Supplementary Table 8: Aberrant glycolytic metabolism in ESCC and its key enzyme, PGK1, as a potential therapeutic target, Related to Fig 6, 7, and Supplementary Fig. 7.
Sheet	Description
8a	The overall survival information of PGK1. The data was downloaded from TCGA.
8b	Metabolites levels in KYSE150 cells transfected with PGK1, or co-transfected with PGK1 and ERK2.
8c	Metabolites levels in PGK1-knockdown KYSE150 cells and control cells.
8d	The impacts of PGK1 and/or ERK2 on PDH activity in KYSE150 cells and ECA109 cells.
8e	Cell proliferation in KYSE150 cells and ECA109 cells with various treatments.
8f	Cell proliferation in KYSE150 cells and ECA109 cells with PGK1 knockdown and/or ERK2 knockdown.
8g	Cell proliferation in GAPDH or PGM-knocking down- KYSE150 cells (left) and ECA109 cells (right).
8h	The effects of gemcitabine on inhibition of PGK1 activity (IC50: 16.3 nM).
8i	Gemcitabine decreased PGK1 mediated metabolic flux.
8j	Gemcitabine inhibited cell proliferation.
8k	Tumor weight (g) of KYSE150 cells (left) and ECA109 cells (right) xenografts in three groups: control group, PGK1-overexpression (OE) group, and PGK1-OE-inhibitor (gemcitabine) group.
8l	Tumor weight (g) of KYSE150 cells (left) and ECA109 cells (right) xenografts in two groups: control group and PGK1-knockdown group.

## Sheet: 8a
Patients	Group	OS_Status	OS_days	RNA-seq	Log-rank (Mantel-Cox) test
TCGA-VR-A8EO	Low	0	785	3129.55	Chi square	7.081
TCGA-IG-A5S3	Low	0	712	3474.17	df	1
TCGA-LN-A49Y	Low	0	379	3876.87	p value	0.0078
TCGA-LN-A8I1	Low	0	401	4423.04	p value summary	**
TCGA-LN-A4A5	Low	1	681	4489.38	Are the survival curves sig different?	Yes
TCGA-VR-A8EY	Low	0	1025	4527.93
TCGA-VR-AA4G	Low	0	549	4719.75
TCGA-LN-A49N	Low	0	378	4973.37
TCGA-IG-A8O2	Low	1	142	5051.47
TCGA-LN-A9FP	Low	0	366	5079.48
TCGA-XP-A8T6	Low	1	763	5218.92
TCGA-IG-A4P3	Low	1	567	5244.4
TCGA-LN-A49R	Low	0	407	5434.45
TCGA-VR-AA7B	Low	0	342	5521.72
TCGA-LN-A4MR	Low	0	402	5556.69
TCGA-LN-A4A8	Low	0	472	5614.71
TCGA-L5-A8NQ	Low	1	650	5648.55
TCGA-LN-A9FQ	Low	0	391	5651.49
TCGA-L5-A8NK	Low	0	412	5681.41
TCGA-V5-AASV	Low	0	467	5818.8
TCGA-VR-A8EP	Low	0	824	5836.33
TCGA-VR-AA7I	Low	1	484	6035.34
TCGA-LN-A49S	Low	0	400	6109.48
TCGA-VR-A8EX	Low	1	855	6241.89
TCGA-VR-AA7D	Low	1	279	6285.51
TCGA-IG-A3YB	Low	0	80	6573.24
TCGA-LN-A7HW	Low	0	365	6635.6
TCGA-LN-A49K	Low	1	180	6805.04
TCGA-LN-A7HY	Low	0	366	7164.68
TCGA-JY-A6FD	Low	0	2069	7247.04
TCGA-IG-A3QL	Low	0	1071	7342.48
TCGA-IG-A3YA	Low	0	632	7369.25
TCGA-LN-A9FR	Low	0	373	7401.99
TCGA-LN-A4A9	Low	1	351	7675.95
TCGA-LN-A5U7	Low	0	768	7764.61
TCGA-VR-A8ET	Low	1	47	7962.39
TCGA-VR-A8EZ	Low	1	553	8056.15
TCGA-LN-A4A3	Low	0	388	8126.11
TCGA-LN-A49W	Low	0	403	8183.13
TCGA-Z6-A9VB	Low	0	40	8190.3
TCGA-Q9-A6FU	Low	1	157	8387.97
TCGA-IG-A97H	Low	0	441	8643.37
TCGA-IG-A3YC	Low	0	612	8747.21
TCGA-LN-A8I0	Low	0	407	8822.52
TCGA-VR-A8EW	Low	1	247	8979.3
TCGA-LN-A49U	Low	0	467	9174.4
TCGA-LN-A7HZ	Low	0	401	9712.31
TCGA-LN-A49X	Low	0	384	9855.66
TCGA-LN-A4A2	Low	0	380	9956.59
TCGA-Z6-A8JE	Low	0	64	10224
TCGA-IG-A3I8	Low	0	1012	10274.3
TCGA-S8-A6BW	Low	0	620	10506.2
TCGA-Z6-AAPN	Low	0	81	10592
TCGA-LN-A49P	Low	0	375	10788
TCGA-LN-A49L	Low	0	318	10905.1
TCGA-L7-A56G	Low	1	330	11051.6
TCGA-LN-A49O	Low	0	408	11127.3
TCGA-LN-A8HZ	Low	0	375	11396
TCGA-IG-A50L	Low	0	16	11714.2
TCGA-IG-A51D	Low	0	518	11917.8
TCGA-JY-A6FE	Low	1	112	11938.7
TCGA-LN-A7HX	Low	0	372	11960
TCGA-LN-A4MQ	Low	0	375	11961.2
TCGA-LN-A49M	Low	0	385	12104.9
TCGA-JY-A6FG	Low	1	1263	12509.3
TCGA-LN-A5U5	High	1	136	12677.4
TCGA-XP-A8T8	High	0	437	12856.3
TCGA-JY-A93F	High	0	731	12858.2
TCGA-IG-A5B8	High	1	24	13362.9
TCGA-LN-A4A6	High	0	391	13373.8
TCGA-IG-A97I	High	0	370	13859.3
TCGA-LN-A9FO	High	0	4	13882
TCGA-IG-A625	High	1	390	14315.7
TCGA-L5-A43J	High	1	131	14767.7
TCGA-Z6-A8JD	High	0	104	15140.6
TCGA-IG-A3Y9	High	1	26	15408.9
TCGA-LN-A7HV	High	0	320	15635.7
TCGA-LN-A5U6	High	0	375	16168.8
TCGA-IG-A6QS	High	1	303	19054.5
TCGA-VR-A8EU	High	1	557	20396.2
TCGA-LN-A4A1	High	0	383	29248.5

## Sheet: 8b
PGK1 OE	Vector								PGK1								PGK1 + ERK2								pvalue (t-test)			p value from two-tailed Student's test.
																									Empty vector/PGK1	Empty vector/(PGK1+ERK2)	ERK2/(PGK1+ERK2)
3-phosphoglycerate	1.17511	0.80174	0.881309	1.07508	1.06677	0.98944	0.79654	1.21402	1.69285	1.81848	1.27318	1.21167	1.06502	1.2553	1.59151	1.37856	2.45474	2.16155	2.43049	2.38058	2.21516	1.95515	1.77799	2.06454	0.00204988	1.56689e-08	2.69297e-05
Pyruvate	0.990665	1.00911	0.872579	1.26893	1.03858	0.870866	1.0326	0.916743	1.4469	1.63992	1.11819	1.71163	1.4612	1.6536	1.03413	1.35491	2.07993	1.80129	2.21194	2.36413	1.17584	1.68256	1.80921	2.23129	0.000708557	1.65756e-05	0.00898838
Lactate	0.74435	1.07632	0.911651	0.943771	1.3078	1.21401	0.786449	1.01567	1.35879	1.75896	1.06916	1.39968	1.75805	1.39147	0.952731	0.864675	2.59857	1.80432	1.71051	2.58591	1.5396	1.74865	2.48245	2.3423	0.0367984	1.53009e-05	0.00138129
Citrate	0.715428	0.865493	1.00701	1.36593	1.24674	1.02891	0.661859	1.10882	1.35018	0.940037	1.18988	1.75861	1.86007	0.971866	1.62743	1.11564	0.950223	1.25876	1.07979	1.26238	1.24268	0.95681	0.81582	0.862357	0.0378044	0.628318	0.0545641
Succinate	0.820815	1.01757	0.812628	1.22525	0.738397	1.12889	1.2284	1.02798	1.90042	1.11451	1.03789	1.35011	1.26689	1.12289	1.35505	1.9116	1.02592	0.906179	1.2408	0.932464	0.821238	0.566055	0.830978	0.845667	0.0154352	0.297085	0.00352207
Fumarate	0.988006	0.926128	0.918762	0.947955	0.976718	0.910464	1.30789	1.02409	2.24959	1.60389	1.98152	1.23677	2.24446	1.21186	1.30624	2.39261	0.472705	0.535127	1.33644	0.825556	0.874562	1.45875	0.629155	0.69745	0.000749256	0.301384	0.000803845
Serine	0.908111	0.940053	0.959555	1.10336	1.08892	1.02165	1.12316	0.85519	1.4543	1.28443	1.39095	1.63769	1.37357	1.4032	1.28594	1.3907	1.64018	1.411	1.93663	1.87943	1.89565	1.72645	1.87442	1.66987	2.33069e-06	5.31673e-08	0.000319087
Glycine	0.952446	0.78738	1.11721	1.38627	0.920989	0.800363	0.801646	1.23367	1.05142	1.27522	1.20772	1.56129	1.20864	1.60479	1.65459	1.40361	1.38254	0.858812	1.05461	1.71167	1.36736	1.68372	1.60622	1.85081	0.00477875	0.00892874	0.641338

## Sheet: 8c
PGK1 knock-down	Scrambled shRNA							PGK1 shRNA							p value (t-test)	p value from two-tailed Student's test.
3-phosphoglycerate	1.08437	1.0967	1.04348	0.990446	0.785	1.03356	0.96644	0.714694	0.654197	0.547851	0.844515	0.823889	0.761344	0.760402	0.000389886
Pyruvate	0.855724	1.07985	0.981016	0.802077	0.910428	0.94284	1.42804	0.859676	0.448944	0.603357	0.329846	0.390177	0.752244	0.664275	0.0021349
Lactate	1.14105	1.02199	1.25046	0.75231	0.80589	1.03371	0.994581	0.916399	0.576203	0.786717	0.78632	0.566143	0.565583	0.728794	0.00420627
Citrate	0.86814	1.06059	1.1913	0.744796	0.609967	0.648432	1.87668	0.831102	0.58817	0.348776	0.608902	1.57332	0.877158	0.735285	0.372281
Succinate	0.732843	0.733708	0.89037	1.25871	0.96914	0.678757	1.73648	0.562791	0.892422	0.504035	0.595754	0.95941	0.688446	0.626148	0.0728472
Fumarate	0.876223	1.06921	0.865862	1.04662	1.06406	0.793471	1.28458	0.438203	0.703482	0.630225	0.263384	0.180605	0.745717	0.19269	0.000360154
Serine	0.981445	0.978884	1.00022	1.00973	1.02972	1.13725	0.862747	0.453859	0.779153	0.668674	0.664666	0.720358	0.734587	0.664168	2.47288e-05
Glycine	1.14758	1.16496	1.00804	0.565826	0.893466	0.990696	1.22944	0.738117	0.558151	0.637883	0.280983	0.271261	0.629006	0.369858	0.000682268

## Sheet: 8d
	KYSE150 cells						p value (t-test)	ECA109 cells						p value (t-test)	p value from two-tailed Student's test.
Vector	1.11	0.87	1.28	0.82	0.94	0.97		1.18	0.88	0.92	1.04	1.06	0.92
Vector + ERK2	0.74	0.61	1.05	0.73	0.76	0.99	0.0883389	0.9	0.94	0.68	0.93	0.9	0.61	0.0428101
PGK1	0.64	0.69	0.69	0.77	0.77	1.05	0.0310356	0.94	0.71	1.02	0.77	0.73	0.91	0.0524433
PGK1 + ERK2	0.37	0.45	0.41	0.38	0.4	0.27	7.68704e-06	0.4	0.38	0.37	0.32	0.39	0.38	1.28251e-07
PGK1_S203A	1.01	0.89	1.34	0.84	1.02	0.73	0.814143	0.96	1.02	0.94	1.09	1	1.08	0.782028
PGK1-S203A + ERK2	0.87	0.88	1	0.89	1.3	0.77	0.65932	0.88	0.83	0.97	0.67	0.99	0.8	0.0581524

## Sheet: 8e
KYSE150 cells																					p value (t-test)			p value from two-tailed Student's test.
Days	Empty vector					PGK1					ERK2					PGK1+ERK2					Empty vector/PGK1	Empty vector/ERK2	Empty vector/(PGK1+ERK2)
0 day	0.034	0.057	0.052	0.038	0.074	0.042	0.068	0.056	0.038	0.051	0.065	0.07	0.048	0.041	0.055	0.036	0.078	0.041	0.056	0.08	1	0.605081	0.55161
1 day	0.244	0.315	0.291	0.258	0.311	0.462	0.525	0.553	0.469	0.491	0.332	0.295	0.371	0.366	0.418	0.79	0.76	0.702	0.805	0.745	1.06471e-05	0.0196997	3.0236e-08
2 day	0.612	0.515	0.565	0.47	0.64	1.113	1.15	1.315	1.225	1.21	0.72	0.689	0.775	0.749	0.811	1.518	1.65	1.562	1.498	1.705	7.29397e-07	0.00103192	3.44419e-08
3 day	0.97	1.18	0.98	1.031	1.128	2.02	2.21	2.115	2.025	2.13	1.333	1.415	1.385	1.36	1.45	2.698	2.88	2.71	2.79	2.94	5.86491e-08	9.64533e-05	3.02626e-09
4 day	1.766	1.879	1.92	1.701	2.01	3.21	3.3	3.44	3.61	3.54	2.56	2.61	2.485	2.25	2.441	4.89	4.56	5.05	4.64	4.71	1.46899e-07	7.60686e-05	2.91745e-09
ECA109 cells																					p value (t-test)
Days	Empty vector					PGK1					ERK2					PGK1+ERK2					Empty vector/PGK1	Empty vector/ERK2	Empty vector/(PGK1+ERK2)
0 day	0.047	0.055	0.064	0.04	0.052	0.049	0.07	0.053	0.042	0.066	0.061	0.048	0.055	0.059	0.045	0.05	0.044	0.048	0.062	0.06	0.523742	0.703073	0.827189
1 day	0.221	0.202	0.261	0.245	0.236	0.445	0.512	0.396	0.472	0.432	0.303	0.285	0.204	0.261	0.326	0.849	0.801	0.775	0.632	0.711	8.77554e-06	0.102231	9.51952e-07
2 day	0.447	0.481	0.531	0.515	0.48	1.012	0.95	0.982	1.126	0.956	0.711	0.698	0.817	0.868	0.651	1.642	1.574	1.556	1.569	1.387	4.86328e-07	0.000315558	1.13761e-08
3 day	1.01	0.952	0.855	0.93	0.81	1.743	1.806	1.756	1.962	2.1702	1.321	1.246	1.301	1.438	1.279	2.521	2.69	2.761	2.892	2.657	3.95325e-06	3.05578e-05	6.19094e-09
4 day	1.4146	1.65	1.485	1.5156	1.605	3.022	3.3773	3.233	2.825	2.95	2.1868	2.265	2.0484	2.166	2.2498	4.548	4.19	4.691	4.745	4.4821	5.43024e-07	3.21223e-06	2.69792e-09

## Sheet: 8f
KYSE150 cells																					p value (t-test)			p value from two-tailed Student's test.
	Scrambled shRNA					PGK1 shRNA					ERK2 shRNA					PGK1/ERK2 shRNA					Scramed shRNA/PGK1 shRNA	Scramed shRNA/ERK2 shRNA	Scramed shRNA/(PGK1/ERK2) shRNA
0 day	0.0533	0.0472	0.0456	0.068	0.059	0.0544	0.0506	0.0589	0.0445	0.0665	0.043	0.0657	0.054	0.0615	0.0589	0.0535	0.0525	0.053	0.0428	0.0489	0.949781	0.732849	0.355168
1 day	0.31053	0.32105	0.28947	0.30526	0.29474	0.23016	0.21316	0.24737	0.26842	0.22105	0.27895	0.27895	0.32105	0.24737	0.27211	0.2081	0.1995	0.1865	0.212	0.205	0.000327102	0.0986369	5.72152e-07
2 day	0.784	0.616	0.6944	0.672	0.6496	0.617219	0.450331	0.463576	0.456954	0.470199	0.537086	0.603311	0.683444	0.695364	0.519868	0.351656	0.384106	0.38543	0.345033	0.388079	0.00196077	0.13939	5.98963e-06
3 day	1.3132	1.454	1.176	1.2348	1.274	0.9344	0.765	0.8548	0.8262	0.7752	1.0814	0.9242	1.09548	0.8854	0.965	0.6108	0.68386	0.64488	0.5408	0.58284	3.59991e-05	0.00140547	1.29324e-06
4 day	2.2995	2.117	2.2265	2.117	2.263	1.3553	1.475	1.3008	1.2986	1.3797	1.6041	1.7175	1.6419	1.823	1.7041	1.09804	0.88048	1.04924	0.96615	0.97615	1.4539e-07	1.19553e-05	1.42305e-08
ECA109 cells																					p value (t-test)
	Scrambled shRNA					PGK1 shRNA					ERK2 shRNA					PGK1/ERK2 shRNA					Scramed shRNA/PGK1 shRNA	Scramed shRNA/ERK2 shRNA	Scramed shRNA/(PGK1/ERK2) shRNA
0 day	0.0587	0.0562	0.04726	0.04594	0.05084	0.04084	0.04594	0.05615	0.04849	0.0536	0.04084	0.05105	0.06126	0.03573	0.05105	0.05615	0.06126	0.04849	0.05105	0.0536	0.47141	0.47685	0.503078
1 day	0.20408	0.29592	0.21224	0.26327	0.26531	0.17818	0.12182	0.24545	0.19636	0.18182	0.22177	0.2621	0.18145	0.25524	0.21169	0.131048	0.162097	0.15121	0.146774	0.177419	0.0425667	0.368892	0.00109943
2 day	0.75188	0.577444	0.526316	0.553383	0.663158	0.42328	0.407831	0.47619	0.518519	0.513228	0.564103	0.461538	0.512821	0.510256	0.487179	0.349351	0.30303	0.34632	0.4329	0.454545	0.0144104	0.0430673	0.00149566
3 day	1.3168	0.98096	1.19072	1.1132	1.2144	0.818182	0.757576	0.69697	0.757576	0.984848	0.9632	0.86	0.8568	0.8788	1.118	0.6784	0.672	0.5696	0.8192	0.512	0.00130933	0.0159009	0.000156657
4 day	2.311	2.1336	1.9304	2.032	2.09507	1.478	1.2847	1.405	1.494	1.21	1.6144	1.64	1.7656	1.532	1.6868	1.07604	1.1529	0.906506	0.95526	1.14074	2.42672e-05	0.000279998	1.04982e-06

## Sheet: 8g
KYSE150 cells																					p value (t-test)			p value from two-tailed Student's test.
Days	Empty vector					PGK1					GAPDH					PGM1					Empty vector/PGK1	Empty vector/GAPDH	Empty vector/PGM1
0 day	0.035186	0.058988	0.053813	0.051975	0.049127	0.053823	0.057949	0.040815	0.06458	0.061859	0.05921	0.057143	0.07619	0.04243	0.056918	0.047255	0.065	0.04243	0.057953	0.08279	0.329864	0.236578	0.289455
1 day	0.252509	0.249854	0.301148	0.286998	0.321846	0.478112	0.543309	0.572285	0.485356	0.608123	0.314358	0.305288	0.283938	0.237876	0.252577	0.281755	0.386504	0.426482	0.333074	0.270981	1.9868e-05	0.861222	0.120386
2 day	0.633343	0.53296	0.584704	0.486391	0.56232	1.15182	1.1901	1.36086	1.26772	1.32198	0.545109	0.713028	0.602028	0.575121	0.639283	0.870939	0.707543	0.916474	0.750242	0.564461	3.65762e-07	0.186757	0.0167862
3 day	1.00383	1.12115	1.01418	1.06696	1.16734	2.19045	2.379	2.18876	2.09562	2.20428	1.17949	1.26435	1.2333	1.40743	1.15677	1.39209	1.59804	1.50451	1.38873	1.24253	3.4561e-08	0.0123848	0.000839294
4 day	1.8588	1.98791	1.88696	1.76032	1.64801	3.32195	3.41508	3.86756	3.7359	3.69866	1.87818	2.2219	2.16626	1.63285	2.12613	2.66053	1.71903	2.22612	2.35018	2.53558	3.67129e-07	0.193197	0.0263483
ECA109 cells																					p value (t-test)
	Empty vector					PGK1					GAPDH					PGM1					Empty vector/PGK1	Empty vector/GAPDH	Empty vector/PGM1
0 day	0.0582	0.05665	0.06592	0.0689	0.05356	0.0669	0.0621	0.05459	0.04326	0.05442	0.06283	0.04944	0.05665	0.06077	0.067162	0.05922	0.0583	0.04944	0.06386	0.0618	0.401069	0.767805	0.59282
1 day	0.22763	0.210806	0.236883	0.225235	0.274308	0.45835	0.52736	0.50788	0.48616	0.44496	0.240069	0.225808	0.161631	0.206792	0.258292	0.397486	0.375014	0.362841	0.295891	0.332877	8.98954e-07	0.427686	0.000447597
2 day	0.486041	0.459543	0.454693	0.522305	0.46944	1.04236	1.0785	1.10115	1.15978	0.98468	0.563331	0.553031	0.647315	0.687723	0.515792	0.768755	0.736918	0.728491	0.734577	0.649368	6.68695e-08	0.00982841	5.78294e-06
3 day	0.89403	0.948056	0.88065	0.979	0.88943	1.99529	1.86018	1.80868	2.12086	2.23531	1.04664	0.987215	1.03079	1.13934	1.01336	1.18029	1.25941	1.29265	1.45398	1.14396	9.80347e-07	0.0046785	0.000300303
4 day	1.4157	1.56995	1.45295	1.52611	1.61532	3.51266	3.47862	3.82999	2.90975	3.30385	1.73262	1.39458	1.62296	1.61614	1.88253	2.12929	1.86168	1.69624	2.22152	2.09844	1.88302e-06	0.167055	0.00155099

## Sheet: 8h
Gemcitabine concentration (nM)	Relaltive PGK1 activity
0	1.06	1.05	0.88
25	0.474	0.531	0.486
50	0.304532	0.406809	0.295853
75	0.283412	0.332371	0.288764
100	0.244993	0.313704	0.284727

## Sheet: 8i
Days	Control			Gemcitabine			p value (t-test)	p value from two-tailed Student's test.
	Mean	SEM	N	Mean	SEM	N
0 day	0.06	0.035	3	0.061	0.04	3	0.98589
1 day	0.27	0.06	3	0.21	0.04	3	0.45217
2 day	0.65	0.08	3	0.405	0.045	3	0.055852
3 day	1.23	0.11	3	0.702	0.095	3	0.022106
4 day	2.11	0.135	3	1.08	0.122	3	0.004801

[truncated: 3 more sheets: 8j, 8k, 8l]
