# Supplementary material for: Integrative proteogenomic characterization of early esophageal cancer
Source: Research Square preprint supplement (doi:10.21203/rs.3.rs-227745/v2), 2021-10-12
Supplement: Supplementary file 3 [file 2a04ab3f99a137810c339b1e.xlsx]

## Sheet: Description
Supplementary Table 1: Clinical characteristics of ESCC patients, Related to Fig. 1 and Supplementary Fig. 1.
Sheet	Description
1a	The information of 124 ESCC cases (756 samples) for proteomic profiling; each sample has specific experiment ID at firmiana paltform.
1b	The information of screened 19 cases (54 samples) for phosphoproteomic profiling; each sample has specific experiment ID at firmiana paltform.
1c	The information of 11 cases (53 samples) for whole-exome sequencing.
1d	The HPV negative results of 30 early ESCC samples; AJ and Tellgen HPV were used.

## Sheet: 1a
No.	Case ID	Gender	Age	Habit of drinking/smoking	Substages (Experiment ID)_proteome
001	18G28113	male	60	No bad habits of drinking and smoking.	031633	030392	030393	031634	030394
					1	2-1	3-1	3-3	3-5
002	18G35286	male	63	No bad habits of drinking and smoking.	031632	030418	030419	030420
					1	2-1	3-5	4-1
003	18G31715	male	58	No bad habits of drinking and smoking.	030761	030769	030773	030774	030775	030776
					1	2-1	2-2	3-2	3-5	4-1
004	18G32741	male	53	No bad habits of drinking and smoking.	031647	030913	030914	030915	030916	030917	031648	030918
					1	2-1	2-2	3-1	3-2	3-3	3-5	4-1
005	18G20845	male	66	No bad habits of drinking and smoking.	030942	030943	030944	030945	030946	031649
					1	2-1	2-2	3-1	4-1	5-1
006	18G33154	male	73	No bad habits of drinking and smoking.	031130	031131	031644	031132	031137	031645	031133	031134	031646	031135	031136
					1	2-1	3-1	3-3	3-5	4-1	4-2	5-1	6-1	6-2	7-1
007	18G28115	male	55	No bad habits of drinking and smoking.	031184	031185	031186	031650	031187	031188	031189
					1	2-1	2-2	3-1	3-3	3-4	3-5
008	18G29969	male	64	No bad habits of drinking and smoking.	031263	031264	031265	031266	031267
					1	2-1	3-1	3-2	3-3
009	18G21947	male	64	No bad habits of drinking and smoking.	031628	031629	031630	031631
					1	2-1	3-5	4-1
010	18G11864	male	68	No bad habits of drinking and smoking.	031555	031556	031557	031558	031559	031560	031561	031562
					1	2-1	2-2	3-2	4-1	4-2	5-2	6-3
011	18G39558	female	61	No bad habits of drinking and smoking.	031635	031636	031637	031638
					1	2-1	3-2	4-1
012	18G33125	male	58	No bad habits of drinking and smoking.	031639	031640	031641	034972	031642	034973	031643	034830
					1	2-1	2-2	3-1	3-2	3-3	3-4	3-5
013	18G23014	male	55	No bad habits of drinking and smoking.	032059	032060	032061	040575	040576	040577	040578	040579	043439	040580	040581	40582	040583	040584	040585	040586
					1	2-1	2-2	3-3	3-4	3-5	4-1	4-2	4-3	5-2	5-3	6-2	6-3	7-1	7-2	7-3
014	18G28084	male	69	No bad habits of drinking and smoking.	032075	032076	032077
					1	2-1	2-2
015	18G20090	male	70	No bad habits of drinking and smoking.	032078	032079	032080	032081	032082	040587	040588	032085	032086	032087
					1	2-1	2-2	3-1	3-2	3-3	3-5	4-1	7-1	7-2
016	18G10482	male	68	No bad habits of drinking and smoking.	033473	033474	043921	033475
					1	2-1	3-1	4-1
017	18G28515	male	59	No bad habits of drinking and smoking.	033476	033477	033478	033479	033480	033481	033482	033483
					1	2-1	2-2	3-1	3-3	3-4	3-5	4-3
018	18G19746	male	67	No bad habits of drinking and smoking.	033484	032386	032387	032388	032389	032390	040589	040590	032393	032394
					1	2-1	2-2	3-1	3-2	3-3	3-4	3-5	4-1	4-2
019	18G18590	male	73	No bad habits of drinking and smoking.	032395	032396	032397	032398	032399	041857
					1	2-1	2-2	3-1	3-3	4-2
020	18G11519	male	69	No bad habits of drinking and smoking.	032541	032542	41859	41860	032545	032546	041861	032548	032549	032550	032551	037827	037828	036689	032555
					1	2-1	2-2	3-1	3-2	3-3	3-4	3-5	4-2	5-3	6-1	6-2	7-1	7-2	7-3
021	18G12093	male	75	No bad habits of drinking and smoking.	032556	032557	032558	032559	036690
					1	2-1	2-2	3-1	3-2
022	18G19032	male	65	No bad habits of drinking and smoking.	036691	032846	032847	032848	032849	032850
					1	2-1	2-2	3-1	3-3	4-2
023	18G25702	male	68	No bad habits of drinking and smoking.	032851	032852	032853	032854	032855	032856
					1	2-1	2-2	3-1	3-4	7-2
024	18G11525	male	71	No bad habits of drinking and smoking.	032857	032858	036692	032860	032861	036693	032863	032864	032865
					1	2-1	2-2	3-2	3-4	3-5	4-1	4-2	5-3
025	18G22700	male	67	No bad habits of drinking and smoking.	032866	032867	032868	032869	032870	036694
					1	2-1	2-2	3-1	3-3	4-1
026	18G37009	male	78	No bad habits of drinking and smoking.	033258	033259	036695	040591	040592	040593	033264
					1	2-1	2-2	3-1	3-2	3-3	4-1
027	18G34491	male	50	No bad habits of drinking and smoking.	033265	033266	033267	036696	033269	033270	033271
					1	2-1	2-2	3-1	3-3	4-1	5-1
028	18G40537	male	82	No bad habits of drinking and smoking.	033272	033273	033274	033275	033276	033277	033278	033279
					1	2-1	2-2	3-1	3-2	3-3	4-1	6-1
029	18G18558	female	70	No bad habits of drinking and smoking.	033280	033281	033282	033283	033284	033285	033286
					1	2-1	2-2	3-1	3-2	3-4	4-2
030	18G22752	male	63	No bad habits of drinking and smoking.	033287	033288	033289	033290	033291	033292
					1	2-1	2-2	3-1	3-4	4-3
031	18G24463	male	55	No bad habits of drinking and smoking.	033293	033749	033750	033751	033752
					1	2-1	4-1	5-1	5-2
032	18G11526	male	76	No bad habits of drinking and smoking.	033753	033755	033756	033759	033761	033762	033765	033766
					1	2-1	2-2	3-1	3-2	3-3	3-5	4-1
033	18G10863	male	63	No bad habits of drinking and smoking.	033767	033768	033769	033770	033771
					1	2-1	2-2	3-1	6-1
034	18G37010	female	48	No bad habits of drinking and smoking.	033772	033773	033774	033775	033776	033777
					1	2-1	3-1	3-2	3-3	3-5
035	18G32074	male	66	No bad habits of drinking and smoking.	034179	034180	034181	034182	034183
					1	2-1	2-2	3-1	3-3
036	18G27319	male	67	No bad habits of drinking and smoking.	036230	034188	036231	036232
					1	2-1	2-2	3-2
037	18G26124	male	72	No bad habits of drinking and smoking.	036233	034192	034193	034194	034195	034196
					1	2-1	2-2	3-1	3-2	4-1
038	18G19376	male	53	No bad habits of drinking and smoking.	034197	034198	034199	034200	034201	034202	034203
					1	2-1	2-2	3-1	3-2	3-3	4-2
039	18G30360	male	68	No bad habits of drinking and smoking.	034204	034205	034206	034207	034208	034209	034210
					1	2-1	2-2	3-1	3-2	3-3	4-2
040	18G18593	male	50	No bad habits of drinking and smoking.	036234	034700	034701	034702	034703	034704	036897
					1	2-1	2-2	3-2	3-3	3-5	4-1
041	18G29611	male	74	No bad habits of drinking and smoking.	034706	034707	034708	034709	034710	034711	034712	034713	034714	034715
					1	2-1	2-2	3-1	3-2	3-3	4-2	4-3	6-3	7-3
042	18G15088	male	52	No bad habits of drinking and smoking.	034716	034717	034718	034719	037550	037554	037553
					1	2-1	2-2	3-5	4-1	5-3	7-1
043	18G41610	male	66	No bad habits of drinking and smoking.	037551	037555	037556	037557	034727	034728
					1	2-1	5-2	6-3	7-2	7-3
044	18G31373	male	61	No bad habits of drinking and smoking.	034795	034796	034797	034798
					1	2-1	2-2	3-1
045	18G32885	male	70	No bad habits of drinking and smoking.	034799	034800	034801	034802
					1	2-1	2-2	3-3
046	18G38129	male	69	No bad habits of drinking and smoking.	034803	034804	034805	034806
					1	2-1	2-2	3-1
047	18G39557	male	53	No bad habits of drinking and smoking.	034807	034808	034809	034810	034811	034812
					1	2-1	2-2	3-1	3-2	3-3
048	18G39133	male	60	No bad habits of drinking and smoking.	034813	034814	034815	034816	034817	034818
					1	2-1	2-2	3-1	3-2	3-3
049	18G36338	male	64	No bad habits of drinking and smoking.	034819	034820	034821	034822	034823	034824
					1	2-1	2-2	3-1	3-2	3-3
050	18G30649	male	48	No bad habits of drinking and smoking.	034825	034826	034827	034828	034829
					1	2-1	3-2	3-3	4-1
051	18G13306	male	67	No bad habits of drinking and smoking.	034974	034975	034976	034977	034978	034979	034980
					1	2-1	2-2	3-1	3-2	3-3	3-5
052	18G34150	male	49	No bad habits of drinking and smoking.	034981	034982	034983	034984
					1	2-1	2-2	3-2
053	18G22301	male	48	No bad habits of drinking and smoking.	034985	034986	034987	034988	034989	034990
					1	2-1	2-2	3-1	3-4	3-5
054	18G24920	male	65	No bad habits of drinking and smoking.	034991	034992	034993	034994	034995
					1	2-1	2-2	3-3	4-3
055	18G15570	male	71	Drinking for more than 50 years, but having given up drinking alcohol for 1 month; smoking for more than 50 years, with 1 pack and a half/day, but having given up smoking for 2 weeks.	034996	034997	034998	034999	036898
					1	2-1	2-2	3-5	4-1
056	18G37737	male	53	No bad habits of drinking and smoking.	036899	036900	035003	035004	035005
					1	2-1	2-2	3-1	3-2
057	18G12949	male	65	No bad habits of drinking and smoking.	035006	035007	035008	035009	035010
					1	2-1	2-2	3-2	3-3
058	18G37006	male	69	No bad habits of drinking and smoking.	035011	035012	035013	035014
					1	2-1	2-2	7-1
059	18G19406	male	70	No bad habits of drinking and smoking.	035015	035017	035018	035019	035020	035021
					1	2-1	2-2	3-1	3-2	3-3
060	18G40838	male	64	No bad habits of drinking and smoking.	035667	035668	035669	035670	040594
					1	2-1	3-2	3-3	3-5
061	18G01733	female	75	No bad habits of drinking and smoking.	035672	035673	035675	035676	035677	035678	035679	035680
					1	2-1	2-2	3-3	4-1	4-2	5-1	5-2
062	18G04750	male	55	No bad habits of drinking and smoking.	035681	035682	035683	035684	035685	035686	041862
					1	2-1	2-2	3-2	3-3	4-1	5-2
063	18G01727	male	69	No bad habits of drinking and smoking.	035688	035689	035690	035691	035692	035693	035694
					1	2-1	2-2	3-2	3-5	4-1	7-1
064	18G04999	male	53	Drinking and smoking occasionally.	035695	035696	035697	035698	035699
					1	2-1	2-2	3-2	3-5
065	18G06072	male	55	No bad habits of drinking and smoking.	035700	035701	035702	035703	035704
					1	2-1	2-2	3-2	4-1
066	18G37727	male	70	No bad habits of drinking and smoking.	043636	035706	035707	035708	035709
					1	2-1	2-2	3-5	4-1
067	18G06074	male	72	No bad habits of drinking and smoking.	036080	036081	036082	036083	036084	036085	041863	036087
					1	2-1	2-2	3-1	3-2	3-3	3-5	4-1
068	18G09912	male	49	No bad habits of drinking and smoking.	036088	036089	036090	036091	036092	036093
					1	2-1	2-2	3-1	3-2	4-1
069	18G01732	female	72	No bad habits of drinking and smoking.	036095	036097	036099	036100	036101	036102	036103	036104	036105	036107
					1	2-1	2-2	3-2	3-3	3-4	3-5	4-1	5-1	7-1
070	18G00472	male	72	Driking occasionally; smoking more than 40 years with 3 packs a day, but having quit smoking for 4 years.	036111	036114	036116	037544	037545	037546	037552	037547	037548	036133
					1	2-1	3-2	3-3	3-5	4-2	4-3	5-3	6-3	7-3
071	18G07334	male	73	No bad habits of drinking and smoking.	036137	036139	037549	036144	036147	036150
					1	2-1	2-2	3-2	3-3	4-1
072	18G00189	male	61	No bad habits of drinking and smoking.	036152	036157	036158	036159
					1	2-1	2-2	3-3
073	18G06801	male	65	No bad habits of drinking and smoking.	036160	036161	036162	036163
					1	2-1	3-2	4-1
074	18G04751	male	63	No bad habits of drinking and smoking.	036317	036318	036319	036320	036321
					1	2-1	2-2	3-2	4-1
075	18G05238	male	51	No bad habits of drinking and smoking.	036322	036323	036324	036325	036326	036327	036328
					1	2-1	2-2	3-1	3-2	3-4	3-5
076	18G04745	male	64	No bad habits of drinking and smoking.	036329	036330	036331	036332	036333	036334
					1	2-1	3-1	3-2	4-1	5-1
077	18G05932	male	76	Smoking for 10 years, but having quit for 30 years.	036335	036336	036337	036338	036339	036340
					1	2-1	2-2	3-3	4-1	5-1
078	18G07336	female	58	No bad habits of drinking and smoking.	036341	036342	036343	036344	036345	036346	036347
					1	2-1	2-2	3-1	3-2	3-3	3-4
079	18G03811	male	63	No bad habits of drinking and smoking.	036348	036349	036350
					1	2-1	3-5
080	18G00805	male	64	No bad habits of drinking and smoking.	036351	036352	036353	036354	036355	036356
					1	2-1	2-2	3-2	3-3	4-1
081	18G09654	male	62	No bad habits of drinking and smoking.	036357	036358	036359	036360	036361	036362	036363
					1	2-1	2-2	3-2	3-4	3-5	4-1
082	18G07568	male	61	No bad habits of drinking and smoking.	036641	036642	036643	036644	036645	036646
					1	2-1	2-2	3-1	3-2	4-1
083	18G39888	male	73	No bad habits of drinking and smoking.	036647	036648	036649	036650	036651	036652
					1	2-1	2-2	3-1	3-3	4-1
084	18G36635	male	57	No bad habits of drinking and smoking.	036653	036654	036655	036656	040573
					1	2-1	2-2	4-1	5-2
085	18G23372	male	67	No bad habits of drinking and smoking.	040574	036659	036660	036661	036662	036663
					1	2-1	2-2	3-1	3-2	3-3
086	18G07567	male	71	Drinking for 50 years; smoking for 30 years with 30 cigarettes a day.	036664	036665	041151	036667	036668	036669	036670
					1	2-1	2-2	3-1	3-2	3-3	4-1
087	18G19748	male	64	No bad habits of drinking and smoking.	036671	036672	036673	036674	036675	036676
					1	2-1	2-2	3-2	3-5	4-1
088	18G17579	male	58	No bad habits of drinking and smoking.	036677	036678	036679	036680	036681	036682	036683	036684
					1	2-1	2-2	3-1	3-3	3-4	3-5	4-1
089	18G21948	male	54	No bad habits of drinking and smoking.	036685	036686	036687	043920
					1	2-1	2-2	3-2
090	18G33118	male	74	No bad habits of drinking and smoking.	036697	036698	043919	036700
					1	2-1	3-3	5-3
091	18G20086	male	56	No bad habits of drinking and smoking.	036701	036702	036703	036704	036705	036706
					1	2-1	2-2	3-3	3-5	4-1
092	18G33884	male	75	No bad habits of drinking and smoking.	041155	036708	041156	036710	041157	043923
					1	2-1	2-2	3-2	3-3	4-2
093	18G33851	male	77	No bad habits of drinking and smoking.	043924	036714	036715	036716	036717	036718	036719	036720
					1	2-1	2-2	3-1	3-2	3-3	3-5	4-1
094	18G33852	male	49	No bad habits of drinking and smoking.	036721	036722	036723	036724
					1	2-1	3-2	4-1
095	18G27224	male	62	No bad habits of drinking and smoking.	036725	036726	036727	036728	036729	036730	036731
					1	2-1	2-2	3-1	3-2	3-3	4-1
096	18G27225	male	53	No bad habits of drinking and smoking.	036732	036733	036734	036735	036736
					1	2-1	2-2	3-2	3-3
097	18G48682	male	58	No bad habits of drinking and smoking.	036756	036757	036758	036759	036760
					1	2-1	3-1	3-2	5-1
098	18G16929	male	71	Drinking occasionally; smoking for 20 years with 2 packs a day, but having quit smoking for 20 years.	036761	036762	036763	036764	036765	036766	036767	036768
					1	2-1	2-2	3-1	3-2	3-3	3-5	4-1
099	18G45052	female	52	No bad habits of drinking and smoking.	036769	036770	036771	036772	036773	036774	036775	036776	036777	036778	036779	036780	036781
					1	2-1	2-2	3-1	3-2	3-3	4-1	5-2	5-3	6-3	7-1	7-2	7-3
100	18G31365	male	57	No bad habits of drinking and smoking.	036782	036783	036784	036785	036786	036787	036788	036789
					1	2-1	2-2	3-1	3-2	3-3	4-1	7-2
101	18G31696	male	68	No bad habits of drinking and smoking.	036790	036791	036792	036793	036794	036795	036796
					1	2-1	2-2	3-2	3-3	4-1	7-3
102	18G29601	male	63	No bad habits of drinking and smoking.	036797	036798	036799	036800	036801	036802	036803
					1	2-1	2-2	3-1	3-2	3-3	4-1
103	18G49723	male	64	No bad habits of drinking and smoking.	036804	036805	036806	036807	036808	036809	036810
					1	2-1	2-2	3-2	3-3	4-2	7-3
104	18G45370	male	59	No bad habits of drinking and smoking.	036811	036812	036813	036814	036815	036816	036817	036818
					1	2-1	2-2	3-1	3-2	3-5	4-1	7-1
105	18G49387	male	76	No bad habits of drinking and smoking.	044352	044353	044354	036822	036823	036824	036825	036826	036827	036828	036829
					1	2-1	2-2	3-1	3-2	3-3	3-4	3-5	5-1	7-2	7-3
106	18G64564	male	62	No bad habits of drinking and smoking.	036830	036831	036832	036833	036834	036835	036836	036837	036838	036839	036840
					1	2-1	2-2	3-3	3-5	4-1	5-1	6-1	6-2	7-1	7-3
107	18G51416	male	50	No bad habits of drinking and smoking.	036841	036842	036843	036844	036845	036846	036847	036848	036849	036850	036851
					1	2-1	2-2	3-1	3-2	3-3	3-4	4-1	4-2	5-1	7-1
108	18G51188	female	53	No bad habits of drinking and smoking.	036852	036853	036854	036855
					1	2-1	2-2	7-2
109	18G53872	male	80	No bad habits of drinking and smoking.	036856	036857	036858	036859	036860	036861	036862	036863
					1	2-1	3-1	3-2	3-3	4-1	6-3	7-3
110	18G57910	male	62	No bad habits of drinking and smoking.	036864	036865	036866	036867	036868	036869	036870	036871
					1	2-1	2-2	3-2	3-3	3-4	4-1	5-1
111	18G72289	male	47	No bad habits of drinking and smoking.	036872	036873	036874	036875
					1	2-1	4-2	5-3
112	18G62006	male	74	No bad habits of drinking and smoking.	036876	036877	036878	036879	036880	036881	036882	036883	036884	036885
					1	2-1	2-2	3-1	3-2	3-3	4-1	4-3	5-1	5-3
113	18G74280	male	78	Drinking occasionally; moking with half a pack a day.	036886	036887	036888	036889	036890	036891
					1	2-1	2-2	3-2	3-3	4-1
114	18G72284	male	69	No bad habits of drinking and smoking.	036892	036893	036894	036895	036896
					1	2-1	3-2	5-2	6-2
115	18G04062	male	73	No bad habits of drinking and smoking.	037829
					T2
116	18G13576	male	36	No bad habits of drinking and smoking.	037830
					T3
117	18G15031	male	47	No bad habits of drinking and smoking.	037831
					T3
118	18G10997	male	42	No bad habits of drinking and smoking.	037832
					T2
119	18G18383	female	74	No bad habits of drinking and smoking.	037833
					T3
120	18G42762	male	69	No bad habits of drinking and smoking.	037834
					T3
121	18G38355	male	59	Smoking for 30 years but having quit now.	037835
					T2
122	18G01127	male	68	Smoking with 2 packs a day.	037836
					T3
123	18G05710	male	72	No bad habits of drinking and smoking.	037837
					T3
124	18G05750	male	47	Smoking with 15 cigarettes a day.	037838
					T3

## Sheet: 1b
No.	Case ID	Gender	Age	Habit of drinking/smoking	Stages (Experiment ID)-phosphoproteome
003	18G31715	male	58	No bad habits of drinking and smoking.	082085	082086	082087	082088
					1	2	3	4
038	18G19376	male	53	No bad habits of drinking and smoking.	082073	082074	082075	082076
					1	2	3	4
041	18G29611	male	74	No bad habits of drinking and smoking.	082101	082102	082103
					3	6	7
042	18G15088	male	52	No bad habits of drinking and smoking.	082065	082066	082067
					1	2	7
043	18G41610	male	66	No bad habits of drinking and smoking.	082057	082058	082059	082060
					1	2	5	7
058	18G37006	male	69	No bad habits of drinking and smoking.	082104	082105
					2	7
083	18G39888	male	73	No bad habits of drinking and smoking.	082082	082083	082084
					1	2	3
093	18G33851	male	77	No bad habits of drinking and smoking.	082093	082094
					2	3
099	18G45052	female	52	No bad habits of drinking and smoking.	082089	082090	082091	082092
					2	3	5	7
100	18G31365	male	57	No bad habits of drinking and smoking.	082061	082062	082063	082064
					1	2	4	7
103	18G49723	male	64	No bad habits of drinking and smoking.	082077	082078	082079	082080	082081
					1	2	3	4	7
107	18G51416	male	50	No bad habits of drinking and smoking.	082095	082096	082097
					2	3	7
109	18G53872	male	80	No bad habits of drinking and smoking.	082098	082099	082100
					2	3	6
112	18G62006	male	74	No bad habits of drinking and smoking.	082068	082069	082070	082071	082072
					1	2	3	4	5
115	18G04062	male	73	No bad habits of drinking and smoking.	082056
					T2
118	18G10997	male	42	No bad habits of drinking and smoking.	081798
					T2
120	18G42762	male	69	No bad habits of drinking and smoking.	082055
					T2
121	18G38355	male	59	Smoking for 30 years but having quit now.	082054
					T2
124	18G05750	male	47	Smoking with 15 cigarettes a day.	081799
					T3

## Sheet: 1c
No.	Substage/Case ID	Tracks	Gender	Age	Habit (drinking/smoking)
020	1，18G11519	T5	male	69	no
	2-1，18G11519
	3-2，18G11519
	6-1，18G11519
	6-2，18G11519
	7-1，18G11519
	7-2，18G11519
	7-3，18G11519
015	2-1，18G20090	T6	male	70	no
	2-2，18G20090
	4-1，18G20090
	7-1，18G20090
	7-2，18G20090
069	1，18G01732	T5	female	72	no
	2-1，18G01732
	3-2，18G01732
	3-3，18G01732
	3-5，18G01732
	4-1，18G01732
	5-1，18G01732
	7-1，18G01732
070	2-1，18G00472	T6	male	72	yes
	3-3，18G00472
	3-5，18G00472
	5-3，18G00472
	6-3，18G00472
	7-3，18G00472
106	1，18G64564	T2	male	62	no
	2-1，18G64564
	3-5，18G64564
	4-1，18G64564
	5-1，18G64564
	6-2，18G64564
	7-1，18G64564
	7-3，18G64564
004	1，18G32741	T5	male	53	no
	2-1，18G32741
	2-2，18G32741
	3-1，18G32741
	3-2，18G32741
	3-3，18G32741
	4-1，18G32741
013	1，18G23014	T6	male	55	no
	2-1，18G23014
	2-2，18G23014
	3-3，18G23014
	3-5，18G23014
	4-1，18G23014
	7-3，18G23014
115	T2,18G04062		male	73	no
123	T3,18G05750		male	72	no
118	T2,18G10997		male	42	no
116	T3,18G13576		male	36	no

## Sheet: 1d
No.	Cases ID	Results for ZJ HPV	Results for Tellgen HPV
1	18G01733	Negative	Negative
2	18G05238	Negative	Negative
3	18G06801	Negative	Negative
4	18G09912	Negative	Negative
5	18G12949	Negative	Negative
6	18G15570	Negative	Negative
7	18G16929	Negative	Negative
8	18G17579	Negative	Negative
9	18G18593	Negative	Negative
10	18G19748	Negative	Negative
11	18G22752	Negative	Negative
12	18G24463	Negative	Negative
13	18G24920	Negative	Negative
14	18G25702	Negative	Negative
15	18G27319	Negative	Negative
16	18G28113	Negative	Negative
17	18G28515	Negative	Negative
18	18G29611	Negative	Negative
19	18G31365	Negative	Negative
20	18G31696	Negative	Negative
21	18G32885	Negative	Negative
22	18G33851	Negative	Negative
23	18G34150	Negative	Negative
24	18G37010	Negative	Negative
25	18G37727	Negative	Negative
26	18G45052	Negative	Negative
27	18G51188	Negative	Negative
28	18G53872	Negative	Negative
29	18G72284	Negative	Negative
30	18G32074	Negative	Negative
31	NTC	Negative (Low internal control signal)	Negative (Low internal control signal)
32	STD	Negative HPV16 HPV18 positive	Negative HPV16 HPV18 positive
