# Supplementary material for: Integrative proteogenomic characterization of early esophageal cancer
Source: Research Square preprint supplement (doi:10.21203/rs.3.rs-227745/v2), 2021-10-12
Supplement: Supplementary file 5 [file 56290f03cb8bd587e5eee205.xlsx]

## Sheet: Description
Supplementary Table 5: The cell signatures and immun-/stromal-/microenvirnment-score of 756 samples, Related to Supplementary Fig. 4.
Sheet	Description
5a	The immun-/stromal-/microenvirnment-score of 756 samples in ESCC progression.
5b	The cellular signatures of 756 samples in ESCC progression.
	All the data were processed and downloaded from xCell website.

## Sheet: 5a
Score	1(001)	1(010)	1(100)	1(101)	1(102)	1(103)	1(104)	1(105)	1(106)	1(107)	1(108)	1(109)	1(011)	1(110)	1(111)	1(112)	1(113)	1(114)	1(012)	1(013)	1(014)	1(015)	1(016)	1(017)	1(018)	1(019)	1(002)	1(020)	1(021)	1(022)	1(023)	1(024)	1(025)	1(026)	1(027)	1(028)	1(029)	1(003)	1(030)	1(031)	1(032)	1(033)	1(034)	1(035)	1(036)	1(037)	1(038)	1(039)	1(004)
Immune Score	0.1631	0.1645	0.1171	0.0895	0.0881	0.2027	0.0769	0.2323	0.1009	0.3481	0.0982	0.2161	0.1271	0.1585	0.0851	0.2504	0.2657	0.2493	0.121	0.1636	0.3341	0.1291	0.1641	0.1627	0.1521	0.1365	0.1326	0.1876	0.1311	0.1381	0.1281	0.1339	0.1512	0.1447	0.1357	0.0747	0.1402	0.1599	0.1308	0.1247	0.1455	0.1056	0.1897	0.1191	0.1039	0.1085	0.1255	0.0891	0.1648
Stromal Score	0.0604	0.0244	0.0312	0.0616	0.0573	0.0253	0.0078	0.034	0.0204	0.0408	0.0127	0.0626	0.0448	0.0315	0.0233	0.0636	0.0416	0.0502	0.0208	0.0789	0.0659	0.067	0.0163	0.0722	0.0474	0.1012	0.021	0.0168	0.0388	0.0213	0.0106	0.0161	0.0483	0.032	0.0522	0.0769	0.0504	0.0272	0.016	0.0908	0.0294	0.062	0.0504	0.0031	0.049	0.0409	0.0545	0.0348	0.0344
Microenvironment Score	0.2235	0.1888	0.1484	0.1511	0.1454	0.2279	0.0847	0.2664	0.1213	0.3889	0.1109	0.2787	0.1719	0.19	0.1084	0.314	0.3073	0.2995	0.1418	0.2426	0.4	0.1962	0.1804	0.2349	0.1995	0.2377	0.1536	0.2044	0.1698	0.1594	0.1387	0.15	0.1995	0.1767	0.188	0.1516	0.1906	0.1871	0.1468	0.2155	0.1749	0.1677	0.2401	0.1222	0.1529	0.1493	0.18	0.1239	0.1992
[truncated: 708 more columns]

## Sheet: 5b
Cell signature	1(001)	1(010)	1(100)	1(101)	1(102)	1(103)	1(104)	1(105)	1(106)	1(107)	1(108)	1(109)	1(011)	1(110)	1(111)	1(112)	1(113)	1(114)	1(012)	1(013)	1(014)	1(015)	1(016)	1(017)	1(018)	1(019)	1(002)	1(020)	1(021)	1(022)	1(023)	1(024)	1(025)	1(026)	1(027)	1(028)	1(029)	1(003)	1(030)	1(031)	1(032)	1(033)	1(034)	1(035)	1(036)	1(037)	1(038)	1(039)	1(004)
Epithelial cells	0.178	0.1703	0.2062	0.1709	0.1835	0.1643	0.2154	0.178	0.1829	0.153	0.2048	0.1732	0.1788	0.1999	0.1684	0.1542	0.1497	0.1666	0.1892	0.1805	0.1655	0.1794	0.1602	0.1668	0.172	0.1533	0.1633	0.1967	0.1611	0.169	0.175	0.1492	0.1954	0.1766	0.2111	0.2009	0.1701	0.1541	0.1751	0.1988	0.1583	0.1757	0.184	0.1791	0.1953	0.1775	0.1868	0.2124	0.1795
Keratinocytes	0.1403	0.14	0.1598	0.1395	0.1451	0.123	0.1588	0.13	0.1565	0.1353	0.1721	0.1414	0.1394	0.13	0.1485	0.1129	0.1277	0.1407	0.1467	0.1358	0.1288	0.1469	0.1443	0.1365	0.1445	0.1364	0.144	0.1441	0.1384	0.1494	0.1444	0.1393	0.1583	0.1453	0.173	0.1595	0.1383	0.1469	0.1425	0.16	0.156	0.148	0.1413	0.1449	0.1485	0.1461	0.15	0.1606	0.1392
HSC	0.122	0.2179	0.1671	0.1221	0.1707	0.1879	0.1158	0.2609	0.2298	0.1721	0.2184	0.2689	0.1135	0.2495	0.17	0.2473	0.2695	0.1858	0.23	0.1126	0.2592	0.2261	0.2229	0.2237	0.225	0.2746	0.2293	0.2035	0.2329	0.1703	0.217	0.1982	0.236	0.2275	0.1633	0.082	0.1397	0.1721	0.2212	0.2014	0.1544	0.1245	0.1765	0.2123	0.1052	0.1581	0.1386	0.1916	0.1209
Tregs	0.0675	0.0773	0.0651	0.0561	0.0604	0.0347	0.0219	0.0441	0.0828	0.042	0.0713	0.0695	0.0782	0.0779	0.056	0.0586	0.0795	0.0364	0.0838	0.082	0.0506	0.0588	0.0407	0.0726	0.064	0.0364	0.0738	0.0522	0.0361	0.0462	0.0803	0.0736	0.0852	0.0698	0.0611	0.0467	0.0809	0.056	0.0765	0.0804	0.043	0.0688	0.0787	0.0803	0.0335	0.0799	0.0362	0.0604	0.0657
CD8+ T cells	0	0	0	0	0.0043	0	0	0	0	0	0	0	0	0	0	0	0.027	0	0	0	0	0	0	0	0	0	0	0.0135	0.0072	0	0	0	0.004	0	0	0	0	0	0	0.0379	0	0	0.0198	0	0	0	0	0.002	0
Endothelial cells	0	0	0	0.0431	0	0	0	0	0	0	0	0	0.0144	0	0	0	0.0241	0	0	0.0013	0	0.0065	0.0098	0	0	0.0695	0	0	0	0	0	0	0	0	0.0073	0	0	0	0.0074	0.0247	0	0.0086	0.0123	0	0.0275	0.0101	0.0169	0.0022	0.0109
GMP	0.0679	0.083	0.0185	0.0515	0.044	0.127	0.0486	0.1641	0.0475	0.1287	0	0.1591	0.0018	0.0964	0	0.1046	0.1635	0.1457	0	0.0504	0.1609	0.0105	0.0984	0.0412	0.0175	0.126	0.0887	0.0822	0.1006	0.0027	0.0098	0.0535	0.0499	0.0277	0.0908	0	0.0301	0	0.0312	0.0947	0	0.0644	0.0675	0.0549	0.0094	0.0179	0.0247	0.0313	0
Th1 cells	0.0854	0.039	0.1515	0.0643	0.0841	0.1146	0.045	0.0152	0.0002	0.0098	0.0412	0.0659	0.0609	0.0402	0.0615	0.0515	0.0666	0.0415	0.0898	0.0318	0.0389	0.0859	0.0707	0.0519	0.084	0.0192	0.0333	0.0463	0.0182	0.0537	0.0481	0.0225	0.0428	0.014	0	0.0081	0.0387	0.0361	0.05	0	0.0114	0.0617	0.0001	0.0395	0.0271	0.0184	0.0337	0.0566	0.0492
Macrophages	0	0	0.0137	0	0	0.0162	0	0.016	0	0	0.0358	0.0104	0	0	0	0.0228	0	0	0.0067	0	0	0	0	0.0003	0	0	0	0	0	0.0246	0.0018	0.0125	0.0174	0	0.008	0.0165	0	0	0.0131	0.0225	0.0609	0	0	0	0.005	0	0	0.022	0
GMP	0.0679	0.083	0.0185	0.0515	0.044	0.127	0.0486	0.1641	0.0475	0.1287	0	0.1591	0.0018	0.0964	0	0.1046	0.1635	0.1457	0	0.0504	0.1609	0.0105	0.0984	0.0412	0.0175	0.126	0.0887	0.0822	0.1006	0.0027	0.0098	0.0535	0.0499	0.0277	0.0908	0	0.0301	0	0.0312	0.0947	0	0.0644	0.0675	0.0549	0.0094	0.0179	0.0247	0.0313	0
[truncated: 708 more columns]
