# Supplementary material for: Integrative proteogenomic characterization of early esophageal cancer
Source: Research Square preprint supplement (doi:10.21203/rs.3.rs-227745/v2), 2021-10-12
Supplement: Supplementary file 9 [file 346b53856f1b50f8228512ce.xlsx]

## Sheet: Description
Supplementary Table 4: The gene effects of RNAi- and CRISPR-mediated depletion on ESCC cell lines and the cancer associated genes, Related to Fig. 2.
Sheet	Description
4a	The gene effects of RNAi-mediated depletion on ESCC cell lines.
4b	The gene effects of CRISPR-mediated depletion on ESCC cell lines.
4c	The list of cancer-associated genes.

## Sheet: 4a
Gens Symbol	Gene effects (mean)
A1BG	-0.0491447
NAT2	-0.00514768
ADA	0.0299424
CDH2	0.0303649
AKT3	0.0567038
MED6	-0.464873
NR2E3	-0.108072
NAALAD2	0.0948188
DUXB	0.17033
PDZK1P1	-0.00601235
DDTL	0.256376
NAALADL1	0.215228
SIGLEC14	-0.173628
ACOT8	-0.40123
ABI1	-0.00554034
GNPDA1	0.00550799
KCNE3	-0.0818473
ZBTB33	0.0850144
CDH3	0.0412918
TANK	-0.306025
POM121C	-0.146316
PMS2P7	0.08806
TMEM170B	-0.55487
EGOT	0.0298574
CTAGE4	0.0348765
CDC42P3	0.05854
ZBTB42	-0.106635
FAM106C	0.0132649
MSTO2P	-0.0885065
DPY19L1P1	0.0222529
ZNF737	-0.0295434
HDAC6	-0.073258
PARD6G-AS1	-0.166856
LRRC70	-0.00764617
LRRC69	-0.0216438
SBK3	-0.183975
TSTD3	0.0911473
ZNF663P	0.169163
SPATA48	-0.263416
RAB6C-AS1	0.0153728
CD300LD	0.134578
UBE2DNL	-0.0743834
KIR2DS2	0.107959
FAM157B	-0.113773
FCGR1CP	0.12929
PGAM1P5	0.147016
DCAF13P3	-1.27483
PMS2P9	0.177189
RASA4DP	0.123292
CD24	-0.0724252
KCNJ18	0.219193
UPK3BL1	0.566231
JMJD7	-0.170307
PLA2G4B	0.114719
HDAC5	-0.0235202
C17orf99	0.00862073
CTAGE8	0.037691
KLLN	-0.224284
PDCD6IP	-0.202954
PDCD6	-0.101739
BCL2L10	-0.0310901
SRRM5	-0.443641
BCL2L11	-0.0333123
TOMM6	-0.108695
SH2B3	-0.0585092
C5orf52	-0.208575
PPIAP30	-0.0975948
CDH4	-0.0757291
GNE	-0.131576
HCN4	-0.0148387
INSL5	-0.0514149
FRAT1	-0.0331916
TROAP	-0.0074217
MED16	-0.0889762
PIGK	-0.0191652
ARHGEF33	-0.217005
MEF2B	0.120824
RASA4B	0.0288542
CMC4	-0.0732884
FAM86KP	0.20673
WASHC1	-0.000319559
POTEB2	0.0953028
ANKRD66	-0.327127
TTC34	-0.214021
NBPF20	-0.233098
WASH8P	-0.0504128
FRG2C	-0.0281381
HYDIN2	-0.128314
FRG1CP	0.0290913
ZNF605	-0.13604
CDH5	0.00957467
GPR75-ASB3	0.0620007
TMED7-TICAM2	-0.235934
TSNAX-DISC1	0.27612
NDUFAF4P1	0.0545923
GCSHP3	-0.0640281
CHAF1A	-0.754084
NPPA-AS1	-0.00171756
PARP2	-0.0873367
PARP3	0.022715
CDH6	-0.051622
TOM1L1	0.10333
DBET	-0.0681498
HMGXB4	0.0261374
TOM1	0.00938223
SH2D3C	-0.0736195
SH2D3A	-0.0550264
MAMLD1	-0.054606
CST8	0.0868859
RANBP9	0.00207779
DNAJB6	-0.0727873
CCDC180	-0.0784741
CDH7	0.11885
SLC17A4	0.145964
LINC01602	0.0772046
GPR176-DT	0.0884914
SPATA1	0.133534
LINC01549	0.0900614
PPP5D1	0.137119
ARL17B	0.0822198
GVQW3	-0.113907
PTMAP9	-0.494373
OCLN	-0.0977056
SLFN12L	-0.0104433
SMLR1	-0.0251738
ERVK13-1	0.118453
MICA	0.0415199
SMC4	-0.866183
TBC1D3J	-0.212579
GJC1	-0.142807
LY75-CD302	0.0152086
ARPC4-TTLL3	-0.0419751
MSANTD3-TMEFF1	-0.0968716
RBM14-RBM4	0.16404
ATP5MF-PTCD1	-0.259867
ABHD14A-ACY1	0.0287292
CCDC169-SOHLH2	-0.188295
RNF103-CHMP3	0.0110475
STIMATE-MUSTN1	-0.166962
EPPIN-WFDC6	0.126786
ARPIN-AP3S2	-0.207603
NT5C1B-RDH14	0.203285
INMT-MINDY4	0.0236006
FPGT-TNNI3K	-0.215871
BLOC1S5-TXNDC5	-0.0949798
EEF1E1-BLOC1S5	0.120117
TGIF2-RAB5IF	-0.0268632
GIMAP1-GIMAP5	0.069995
MROH7-TTC4	0.0855865
PMF1-BGLAP	-0.201814
TLCD4-RWDD3	0.0211489
BORCS7-ASMT	-0.0440964
TMX2-CTNND1	0.086071
SAA2-SAA4	-0.120849
ARL2-SNX15	-0.119414
POC1B-GALNT4	0.0296926
KLRC4-KLRK1	0.118487
ARMCX5-GPRASP2	0.0624222
NEDD8-MDP1	-0.104926
BCL2L2-PABPN1	0.119837
RPL36A-HNRNPH2	-0.0478639
CORO7-PAM16	0.165173
RPS10-NUDT3	-0.155795
HSPE1-MOB4	0.202656
CKLF-CMTM1	0.104142
SYNJ2BP-COX16	-0.223493
CHURC1-FNTB	-0.035203
MIA-RAB4B	0.183055
RAB4B-EGLN2	0.0054719
ZNF625-ZNF20	-0.0566026
AP1M2	-0.156823
NPHP3-ACAD11	-0.0333402
NDUFC2-KCTD14	-0.141275
COMMD3-BMI1	0.157221
MSH5-SAPCD1	-0.0684599
INO80B-WBP1	-0.180024
ATP6V1G2-DDX39B	0.238601
PPT2-EGFL8	0.0225413
C8orf44-SGK3	-0.305673
RTEL1-TNFRSF6B	-0.0722036
ZNF670-ZNF695	0.187479
UBE2F-SCLY	0.0948721
FXYD6-FXYD2	-0.0192779
ARHGAP19-SLIT1	0.124289
BIVM-ERCC5	0.0806788
DNAAF4-CCPG1	-0.114285
TVP23C-CDRT4	-0.157129
SENP3-EIF4A1	0.445626
P2RX5-TAX1BP3	0.103384
APOC4-APOC2	0.0251808
URGCP-MRPS24	0.0912299
STX16-NPEPL1	0.0680582
HNRNPUL2-BSCL2	0.1667
ISY1-RAB43	0.0291561
TM4SF19-TCTEX1D2	-0.255001
C1QTNF3-AMACR	-0.019284
UBA2	-0.568193
SAE1	-0.2364
FARSB	-0.0765457
ABCC5	-0.0679993
ABCB6	-0.0244458
DNM1L	-0.340628
CDH8	0.0325958
ABCC9	0.100472
ABCF2	-0.0189525
NR1H3	-0.0180615
COX17	-0.102096
FAM47E-STBD1	-0.106642
ALOX15P1	0.114021
SCAMP2	0.0722087
SCAMP3	0.0315957
IL18BP	-0.109544
RWDD2B	-0.0403233
MUC12	-0.101344
DPP3	-0.111315
SNUPN	-0.0590711
HUWE1	-0.458115
PTPRU	-0.0385911
TSPAN32	0.153245
TSSC4	0.0981496
ATP9A	0.00538652
CDH10	0.0640151
PDCD7	-0.104441
GPC6	-0.0603118
MYZAP	0.182
USH1C	0.0248561
PQBP1	-0.182667
EDIL3	0.110004
HHLA1	-0.353793
FSBP	0.0714452
CYP3A7-CYP3A51P	-0.0320393
CERT1	-0.204297
MRPS31P5	-0.0373817
KCNK7	-0.0453608
CDH11	-0.129573
UST	0.129651
APOBEC3A_B	0.317201
ARPC5	0.0213262
ARPC4	-0.174665
ARPC3	0.0235922
ARPC1B	-0.115462
ACTR3	-0.245949
ACTR2	-0.2928
TSPAN5	-0.0901002
TSPAN3	-0.147889
FAM106B	0.0613792
POTEB	-0.0553523
FAM230D	-0.0605922
FAM74A7	0.137981
SRGAP2D	0.0810434
NPY4R2	-0.0507966
FMC1-LUC7L2	0.0148242
ADAM8	-2.32724e-05
CDH12	-0.0254676
TSPAN2	0.0628195
TSFM	-0.0610655
TSPAN1	0.13158
PPIF	0.240729
CTDSP2	-0.250746
TBC1D3G	0.047264
TBC1D3K	0.102053
TBC1D3L	-0.000201807
TBC1D3D	0.241614
TRIM10	-0.00796686
ARPC2	-0.279995
SGK2	-0.205164
RAD50	-0.0109925
KIF20A	-0.0887308
PREB	-0.265761
HIPK3	-0.281754
ENAM	0.0923242
CDH13	0.108303
ACTR1B	0.154761
ACTR1A	-0.645199
ARL4C	-0.239211
ARL4A	0.0728969
ZNF263	-0.0342777
LRPPRC	-0.28629
FRY	-0.0510282
CDH15	-0.0807167
PDIA6	0.103411
TRAP1	0.0191702
OPTN	0.0128929
NAMPT	-0.242903
CELA3A	-0.0853478
RBM12	-0.0886254
YAF2	0.0620009
ARFRP1	-0.211459
CDH16	-0.134897
TOB1	-0.138248
LINC01587	0.0200913
AKAP9	-0.108172
CLEC3A	0.0629578
FAM13A	-0.10851
G3BP1	-0.0435215
SUGP2	0.099189
EBI3	-0.128445
ADGRG2	-0.0624637
CDH17	-0.0145007
MBNL2	-0.00521579
HNRNPA3P1	-0.0784668
ABI2	-0.0254419
CEBPZ	-0.690952
PLXNC1	-0.0673964
TRIM28	-0.136241
RASA4	-0.0292243
AASS	-0.147318
PDZK1IP1	0.0815073
ATP6AP2	-0.359734
CDH18	0.136587
LPAR6	-0.0208112
LPCAT3	0.14475
WASF2	0.0938141
CHST4	-0.0790145
SLC25A13	0.0776567
SLC25A15	-0.0270037
SERF2	0.044902
CDK2	-0.214858
DHRS9	-0.00410426
ZNF256	-0.0726941
SPECC1L-ADORA2A	0.0324798
SORBS3	0.0228157
CNIH1	-0.0533615
STAG3L5P-PVRIG2P-PILRB	-0.155415
TENM1	-4.63621e-05
RBM7	-0.0838752
RBM6	0.136338
RBM5	-0.127174
LHFPL2	0.179317
LHFPL6	-0.114885
TNK2	-0.0852653
ALYREF	-1.22796
CDK4	-0.0577865
TXNDC9	0.046841
FANCD2P2	-0.215591
NBPF25P	0.0303198
NOTCH2NLR	0.116025
RNF41	-0.0192897
FAM239A	0.0270475
TSHZ1	-0.00247911
ALG3	0.100661
PRMT3	-0.00198395
PSME3	-0.194626
MPHOSPH9	-0.156236
MPHOSPH10	-0.819861
ADAM10	-0.336141
CDK5	0.0452449
MPHOSPH6	-0.710491
NME6	-0.0496947
DHRS2	0.0809718
CALCRL	-0.165988
NUTF2	-1.23798
MPZL2	0.0215126
TRIM13	-0.109379
PATJ	0.150013
USPL1	-0.721705
EIF1	-0.0552243
CDK6	-0.0681496
TOPORS	-0.158523
FLOT1	-0.0724015
DDX39A	-0.206513
PSMD14	-0.764063
SSX3	0.072994
OLIG2	0.00506379
CTDSPL	-0.0529783
ANGPTL7	-0.107482
KLRG1	-0.0385816
CDK7	-0.197923
GDF11	-0.00134641
TRIB1	-0.158552
GPA33	-0.0662558
ZNF443	0.123232
CD96	0.0818419
PLIN3	-0.0508259
MFSD10	0.0758641
STX6	-0.00522262
C11orf98	0.172483
COQ7	0.0868237
NBR2	0.158571
RCAN2	-0.0184365
MSLN	-0.150724
LRRC23	0.0657848
RASGRP2	0.0370597
HNRNPR	-0.038195
SLC35B1	-0.0347907
DCAF7	-0.197626
AP3S2	0.175059
CDK8	-0.145071
MRPS31	-0.296598
CALCOCO2	-0.0646547
KCNMB2	0.0627051
GPHN	0.0537065
RABEPK	-0.0632985
SLC17A2	-0.194499
RIDA	-0.0345331
POP7	-0.0564538
GLYAT	0.0385018
CDK9	-0.194107
SRRM1	-0.367036
SPRY1	-0.239893
SPRY2	-0.00859205
STAM2	-0.0252161
CNKSR1	0.0619147
ABCC4	-0.107768
CDKN1A	-0.0500738
IGSF6	-0.0271235
SF3B4	-0.770337
CDK2AP2	-0.217837
IRX5	-0.236536
RAMP2	-0.129862
RAMP1	-0.00162568
RAMP3	-0.0242075
ZMPSTE24	-0.0596576
CDKN1B	-0.0657203
AKAP8	-0.0620472
FSTL3	0.0244864
KANTR	0.0327643
ANKRD20A21P	0.227082
CT45A8	0.055639
SPDYE17	-0.132389
TBC1D3E	0.220132
WASH9P	-0.544447
SVIL-AS1	0.243813
SIK1B	0.141711
TBC1D3I	0.0572799
STUB1	-0.0107986
STAG1	0.0843302
NET1	0.0440364
UBE4B	-0.239391
PRSS16	-0.397535
CDKN1C	0.0316407
SIGMAR1	-0.10041
TPTEP2-CSNK1E	-0.00890845
DSCR4	0.11261
BET1	-0.196095
CWC27	-0.185325
SAP18	-0.37889
SMNDC1	-0.502653
BCAS2	-0.15492
RGS19	-0.263558
LILRB2	0.113158
EIF1B	0.00730892
CDKN2A	-0.0127178
SPEG	0.0952029
SF3A1	-1.01841
TRAIP	-0.171522
DNAJA2	-0.0772526
BCKDK	-0.0866225
MAEA	-0.229126
APC2	-0.208747
PAK4	0.0101419
MARCHF6	-0.13497
ADAR	-0.500572
CDKN2B	-0.127555
KATNB1	-0.131864
DLEU1	0.193266
SNAPC5	0.0606184
APBB3	0.0643277
ZNF267	0.127053
CCNO	0.0250702
CDKN2C	-0.0665416
VPS26C	0.0181786
TCIRG1	0.075008
RTN3	-0.184618
LANCL1	-0.0541581
NMUR1	-0.205748
B3GALT5	0.0613058
TNIP1	-0.0899301
LAMC3	0.0214558
CDKN2D	-0.0452357
IKZF1	0.0163526
CRISP3	0.0473716
SMYD5	-0.0266144
KLHL41	0.0397276
RRAGB	-0.182402
SIRPB1	0.0301162
AKR1A1	-0.119327
EMC8	-0.114347
RXYLT1	-0.338407
CDKN3	-0.0286978
CNPY2	-0.0614166
B3GNT3	-0.0249612
CLEC4M	0.134244
TLR6	-0.00537735
MRVI1	0.189157
PCGF3	0.0417069
TFG	-0.104871
PKDREJ	0.0595665
CCL26	-0.148214
TRDN	-0.034985
TRIM22	0.0671734
ABCA7	0.00320326
ABCA10	-0.177695
ABCA9	0.110463
ABCA8	0.0499025
WARS2	-0.0598584
CDO1	0.0344068
NPM3	-0.148983
NPM2	-0.440988
HMG20B	-0.0678135
HMG20A	-0.202714
KLF2	-0.0460989
MICU1	0.109781
CACNG3	0.0593592
CACNG2	-0.138144
CITED2	-0.0180582
SEMA3A	0.0196768
TUBA1B	-0.846302
IRF9	-0.0750326
CDR1	-0.0813691
BPNT1	0.0607543
TUBB3	-0.0345029
TUBB4A	0.147165
TUBB4B	-0.0324762
BTN3A3	0.0790296
BTN2A2	-0.011583
SYCP2	0.0171249
SCML2	-0.168446
CEPT1	-0.140964
CORO2B	-0.0718032
MYL12B	-0.246669
NOD1	-0.0827149
ANAPC10	-0.143086
PRG3	0.0506337
ATP8A1	0.0613453
NDRG1	-0.236678
MYL9	0.136253
RACK1	-0.845749
ADARB1	-0.0529207
CDS1	-0.054318
PEMT	-0.0441992
PIAS3	-0.0359278
ST3GAL6	0.0281961
NDC80	-0.287423
CPQ	-0.0084651
WFDC2	-0.0294372
SPAG11B	-0.0359491
BASP1	0.146153
CDSN	0.05231
IFITM3	-0.0428512
RAPGEF3	-0.086763
NSA2	-0.820602
YAP1	-0.0666738
SPON2	0.145471
SPON1	-0.0306107
PRMT5	-0.39512
TESK2	-0.0313137
CD2BP2	-0.125792
UBAC1	0.138573
CDIPT	-0.178458
PGRMC2	0.1034
ARIH2	0.0799926
TUBGCP3	-0.422133
SEC24B	-0.0941226
CFDP1	0.0235279
CD52	-0.0228232
TMEM147	-0.0401037
RBM14	-0.21633
LYPLA1	-0.0499142
CDC42EP2	0.0962737
EMG1	-0.726882
IFI30	-0.122618
C1D	-0.166674
CDX1	-0.0186642
TIMM17A	-0.107884
N4BP2L2	0.0305235
ZER1	-0.0427992
MCRS1	-0.295836
LRRN2	0.049129
FAM3C	0.124736
ACAA2	0.106299
CDX2	0.0734441
PPIE	-0.754532
VAV3	0.0545692
TOMM40	-0.771655
TAB1	-0.0432511
ECI2	-0.136816
HAX1	0.00584397
GPNMB	0.110663
BAIAP2	-0.0394336
MAD2L2	-0.158953
CDX4	-0.0489895
TACC3	-0.667128
MERTK	-0.134587
CLEC10A	-0.256108
SLC30A9	-0.248314
PPIH	-0.153633
COG5	-0.00753709
ZNHIT1	-0.765649
FST	-0.172787
TIMM44	-0.759696
CLGN	0.053504
PFDN6	0.130893
ZBTB18	0.0574017
HMGN4	0.0297601
TADA3	-0.343967
TRIM38	0.105997
ATP5PD	-0.399132
UBE2E3	0.0816043
SLC25A17	-0.0928539
SLC9A6	0.00189978
CEACAM5	0.0154071
EIF3M	-0.664031
HOXB13	-0.00859131
NXF1	-0.825653
SEC23B	0.133568
SEC23A	-0.0808399
CAP2	0.0481129
CAP1	-0.147646
CREB3	-0.170749
LRRC41	0.0591831
VTI1B	-0.329209
CRTAP	0.0667268
SYNCRIP	0.0106335
STK25	-0.115444
ENOX2	-0.010851
UNC13B	-0.232408
CARM1	-0.0269609
NCOA2	-0.0493753
ADARB2	0.04381
CEBPA	-0.0420057
SEMA6B	-0.191406
SEMA4F	-0.0943615
SEMA4D	-0.0797738
SEMA4B	-0.107532
CEBPB	-0.144646
SEMA3C	-0.0410941
APPBP2	0.0339456
MYBBP1A	-0.522682
FBLN5	-0.153548
FBXW10	0.0906706
CIB2	-0.046008
CIB1	0.0821111
CEBPD	-0.0896501
ZNF211	-0.0107307
DDX17	-0.202009
DEAF1	-0.00835462
CHERP	-0.362235
KAT5	-0.284236
HYOU1	-0.16517
IPO8	0.0955045
IPO7	-0.663687
NOP56	0.000725854
NEBL	0.15957
CEBPE	-0.00680844
PITRM1	-0.095492
ATG7	-0.157267
ZNRD2	0.0605897
RNASEH2A	-0.168437
P3H3	-0.0248646
RELA-DT	0.00438541
UBD	0.0105138
PPIAL4H	0.00150163
ERVK3-1	0.541876
UPK3B	-0.156702
BATF	-0.0551411
GLRX3	0.10457
CEBPG	-0.232237
DCTN2	-0.232056
ANP32B	-0.0433164
LAMTOR5	-0.0520171
PROCR	-0.120351
TM9SF1	0.010333
PRDX4	-0.0665615
ARL6IP5	0.193764
AGR2	-0.139586
ARPC1A	-0.298259
HTATIP2	0.159268
AGPAT1	-0.031694
AGPAT2	-0.115451
RPP30	-0.921199
RPP38	-0.675579
SPTLC1	-0.119148
SLC35A1	-0.137286
CEL	-0.183562
SLC19A2	-0.0645178
IFI44	0.137488
OLFM4	-0.461274
CXCL13	0.100037
ARFGEF1	-0.0317976
AKAP3	0.124425
RABAC1	0.0593733
SLC34A2	0.0875062
SLU7	-0.609176
DPYSL4	-0.0446833
SIVA1	0.0210899
MRPL28	-0.03304
CCT7	-1.34869
CCT4	-1.10197
CCT2	-0.834872
NPC2	-0.0805859
GNLY	-0.0945766
TACC2	-0.00240591
CENPA	-0.327433
SORBS1	0.0285381
IFITM2	0.0616998
COLEC10	-0.327759
POMT1	-0.141047
MAB21L2	0.130169
TXNRD2	-0.0516462
DRAP1	-0.151519
CENPB	-0.321612
SCGN	-0.188759
DNPH1	0.126343
SMC2	-0.917288
PRPF8	-0.952297
ERN2	-0.163257
TRAPPC2B	-0.0505267
AHSA1	0.0259399
SLCO1B1	0.0043989
CENPC	-0.694619
USP16	-0.00797006
CDC42EP3	0.0226676
SH2B2	0.00175453
PAIP1	-0.119683
PAICS	-0.118835
TBL3	-0.731534
MXD4	0.0971967
P3H4	-0.180362
ST6GALNAC2	0.0332505
PDLIM5	-0.0494302
TRIM3	0.114546
HEXIM1	0.0311603
SPAG5	-0.357201
RBCK1	-0.156143
STAMBP	0.0512923
TGOLN2	-0.0848728
CENPE	-0.306827
ARID3B	-0.165067
POLR3F	0.258696
POLR3G	0.0305874
POLR3C	0.0203332
IVNS1ABP	0.00631725
TRIM16	-0.138363
MYL12A	-0.162996
TXNIP	0.0604877
CENPF	0.0327974
PDPN	-0.0792085
POSTN	-0.0895509
ATP5MG	-0.142991
RASL10A	-0.00104084
GAS2L1	-0.15627
RAD51AP1	-0.159025
RGS14	0.0188733
LEFTY1	-0.122375
EXOC5	-0.212131
NPRL2	0.0187479
IGF2BP1	-0.185984
IGF2BP3	-0.0348662
IGF2BP2	-0.0815308
CAMKK2	-0.0667624
SCGB1D2	-0.005667
SCGB1D1	0.167438
PRELID3A	-0.0081163
MTX2	0.0822125
YKT6	-0.0400025
SPINT2	-0.193248
PMVK	-0.0765582
DMRT2	-0.0468471
KHDRBS3	-0.101302
KHDRBS1	-0.0146573
CELF1	-0.167544
CELF2	-0.104659
CES1	0.173544
LBX1	-0.0448591
KLF1	0.084672
CTCF	-0.347928
TSBP1	-0.0790105
CD226	-0.0237943
LINC00680	0.112087
FARS2	-0.306123
CGRRF1	0.0413206
CGREF1	0.161565
RRAGA	0.0419847
DCTN6	-0.272866
GNA13	0.0849217
TNFSF13B	-0.103372
CSPG5	0.0874947
AVIL	0.0668525
B3GNT2	-0.0158728
CETN1	-0.161503
GNB5	-0.110789
EBP	-0.0135495
DLL3	-0.196828
CLDN16	0.0843478
PNMA2	0.0143593
CETN2	0.101064
FUT9	-0.268065
GMEB1	-0.0902705
RRH	0.0467958
CCT6B	-0.154038
CCT8	-1.17958
CNPY3	-0.0619722
CORIN	0.0187879
ADCY1	-0.147362
CETN3	-0.0782387
CETP	0.206303
FAM189B	-0.00842079
USP39	-1.38443
POLD3	-0.0119199
TBR1	0.0179754
AP4B1	0.125824
NRG3	-0.0281046
CFL1	-0.628047
UGT2B11	0.083755
POLQ	-0.0762391
SLC12A7	-0.00633406
OGA	-0.0861276
NFAT5	0.0403568
NUDC	-0.282083
PTGES3	0.0519616
CFL2	-0.0138439
YME1L1	-0.220459
TCFL5	-0.0808507
PLK4	-0.133709
STAG3	0.143141
STAG2	-0.375951
SIX2	-0.11232
RFPL3	0.163855
RFPL2	0.0567571
RBBP9	0.0123847
RAI2	-0.136987
RAI1	0.0431139
PTTG2	0.0680883
PHTF1	-0.0311151
MAP3K2	-0.0640118
MASP2	-0.337912
KLRA1P	-0.063527
KIF1C	0.075907
CTSC	0.0541335
GRAP	-0.0535617
CAPN9	0.0240002
GIPC1	-0.2584
TRAF3IP2	0.0523306
PLAC1	0.0417745
NUP50	-0.230527
NES	0.0940664
KDM5B	-0.0838969
TOB2	0.0753679
HBS1L	-0.17682
AHCYL1	-0.00822913
PLK2	0.0545927
ZMYND11	-0.0491592
SRSF10	-0.197857
ZBTB6	0.036708
POP4	-0.250329
ARPP19	0.0155819
ARPP21	-0.128283
ZNF234	0.0475209
ZNF266	-0.475603
ZNF274	0.0183643
NEK6	-0.0196338
WDR4	-0.0538808
SLC17A3	0.162054
NCKAP1	-0.0962602
IQGAP2	-0.067849
VAMP5	0.202965
ZNF273	-0.0263458
ZNF460	-0.122711
ZNF268	0.0143159
MTHFD2	-0.0789531
OR5I1	-0.00628517
UPK3BL2	-0.347679
REXO1L5P	-0.129835
RPP40	-0.917501
ADCY2	-0.127143
CFTR	-0.0229937
CYSLTR1	-0.0337387
SEPTIN9	-0.0405708
CCR9	-0.042737
GJB6	0.0111661
SDCCAG8	-0.167297
ENTR1	-0.0328372
HSPH1	-0.0229075
STARD10	-0.0574495
CGA	-0.0196681
WASF3	0.0446909
NOXA1	-0.0305369
UTP14A	-0.947569
CPLX2	-0.100685
CPLX1	0.0257578
SPINT3	-0.274237
FRS3	0.00578543
FRS2	0.0121196
NEU3	-0.107347
FAXDC2	0.102524
FAM114A2	0.0967317
ZNF275	0.0261145
CEACAM3	-0.00809666
ALDH1L1	0.0348878
FTCD	-0.156602
PPP1R17	-0.0270337
TUBGCP2	-1.14157
CLPX	0.0520513
PDE10A	-0.0666897
SRCAP	-0.248197
PPP1R13L	0.0220295
CD3EAP	-0.255558
CCL27	-0.0940834
HPSE	-0.13587
RUVBL2	-1.30833
PGRMC1	0.0240564
CYP46A1	-0.0987837
LILRB1	-0.0326625
SLC26A1	0.0777214
ADAM28	0.0159138
SLC22A7	0.0505146
ARID5A	0.00602576
HCP5	-0.0480322
TSPAN9	-0.144114
USP20	-0.00874136
USP19	-0.00536197
CEACAM7	-0.496219
CD300C	-0.137949
ME3	0.153245
NMU	-0.153369
FGL2	-0.100004
EDDM3A	0.0252774
CFHR4	-0.0335697
CFHR3	-0.0397195
SMR3B	-0.149271
CEACAM8	-0.0217397
ACTL7B	0.0391403
ACTL7A	-0.144094
C1QL1	-0.0265639
WDR3	-0.89414
NPFFR2	0.0357817
PROKR1	0.121204
GPR83	-0.08302
CEACAM4	-0.0889667
RAB10	-0.0120974
PPARGC1A	-0.181235
MALT1	-0.0630276
MMP24	-0.0221177
LYVE1	-0.227976
OCLM	0.0933686
YIF1A	0.0330258
CPSF4	-0.461198
JTB	0.0117634
ADCY3	0.0225094
RUNDC3A	0.130935
DHRS4	0.0893986
BRD8	-0.027779
BLCAP	-0.0485873
MAN1A2	-0.017947
TRAFD1	-0.132841
TXNL4A	-0.613017
PNPLA6	-0.00307991
SUGT1	0.02147
UTS2	-0.0242033
GADD45G	-0.0375981
EDAR	-0.111092
PAPOLA	-0.306748
TCERG1	-0.512944
MAGED2	-0.154964
BTNL3	-0.0182662
EHMT2	-0.168882
COPS8	-0.861963
RNPS1	-1.17809
FASTK	0.0182738
SUB1	-0.0291544
SMPDL3A	0.033285
DBF4	-0.263276
SPIN1	-0.0703264
RALBP1	-0.101863
ARHGAP27P1-BPTFP1-KPNA2P3	-0.213994
SRSF8	0.0252875
APOBEC2	0.103814
MORF4L1	0.0418288
PRDX3	-0.112797
GPR75	0.0138921
EHD1	0.207791
AFG3L2	-1.09625
POP1	0.0578365
UGT2A1	0.0374066
PRSS21	-0.0485514
MSL3	-0.0590008
C11orf58	0.0815907
KDELR1	-0.0126157
SF3A3	-0.665796
AP3M2	-0.0470225
STARD3	-0.225238
HNRNPA0	-0.00180065
BTG3	-0.0269176
CBX1	0.00102612
SEC61B	-0.302176
TOMM34	-0.0405167
PDIA5	0.0399335
SERINC3	-0.0500896
OS9	-0.200937
PNRC1	0.132428
TMED2	-0.181922
LMAN2	0.106775
ERP29	0.00566148
MLLT11	-0.0398532
ACOT2	0.142796
EBNA1BP2	-0.74663
CKAP4	-0.04514
HTD2	-0.196415
YWHAQ	0.140573
TMED10	-0.0805126
ASCC3	0.00924915
ADIRF	-0.0127783
UQCR11	-0.136826
CLP1	-0.497152
FERMT2	-0.0151694
COPS6	-1.07481
RAB32	0.0158604
CCNI	-0.0138541
KCNQ1OT1	0.0476161
GCN1	-0.222198
COPS5	-1.15558
METAP2	-0.496564
IMMT	-0.578846
LILRB5	-0.0437112
SLC38A3	0.101657
SF3B2	-1.42107
SDS	-0.0308509
ILVBL	0.0584561
SLC27A5	0.159866
SLC27A4	0.0842593
SLC27A3	0.071942
SLC27A2	0.0439979
KIF2C	0.0173323
SPINK5	0.092374
LILRB4	-0.355529
IL24	-0.105644
CHAD	-0.00875868
GLIPR1	-0.00368091
TLK2	-0.0629593
KLK11	0.0400971
TMSB15A	0.00837838
KDELR2	-0.204354
KDELR3	-0.0990522
ATF7	-0.0693129
SNRNP27	-0.693977
TMED1	0.131491
LIAS	-0.226021
RCBTB2	0.0705501
RAB35	-0.272523
TDRKH	-0.0358644
VAX1	-0.097308
LILRA1	0.119715
LILRA3	-0.0646977
LILRA2	-0.146951
CHAT	-0.0504335
RBPMS	0.0899871
RAB31	-0.0154893
ADAP1	-0.186086
DSTN	0.15952
RIPK3	-0.268681
GTF2A1L	-0.217639
STON1	0.139397
RCC1	-0.748317
PIM2	-0.0435448
MID2	0.154328
TENT4A	-0.180128
UPK1A	0.0564849
SLC35D2	0.120969
ADRM1	-0.0244071
CHD1	-0.0788509
NUDT21	-0.286564
OGFR	0.00651969
ZPBP	-0.0249642
DDX52	-0.29809
ABHD2	-0.141572
WWP1	-0.129496
CHD2	-0.234555
WWP2	-0.532913
CNMD	0.119652
DUS4L	0.0616085
SOX30	-0.108348
CNTRL	0.0384494
UBE2C	-0.0179215
SNRNP35	-0.0367951
DEPP1	-0.0309316
CYB561D2	0.00734031
RAPGEF4	0.037886
CHD3	-0.135457
DUSP14	-0.0924771
TOPBP1	-0.345369
TRIM31	0.0129251
STMN2	-0.064998
HSF2BP	0.104999
TRIOBP	-0.024325
RER1	-0.0666933
CHD4	-0.70841
DNAJB4	-0.0636766
KERA	0.00227185
ESM1	-0.185318
DIDO1	-0.0218437
ADAM30	-0.12058
ADAM29	0.107172
AKR1C4	-0.0978286
WDR5	-0.488583
ADAMTS13	-0.0767391
CACFD1	-0.281679
ADAMTS8	0.0658776
ADAMTS5	0.0776591
PRSS23	0.106513
PTPN21	-0.0552595
ADCY5	-0.0112902
HNRNPUL1	-0.0900826
RPP14	-0.267404
KRR1	-1.00512
KATNA1	-0.0927829
PRDM7	-0.00378694
PRDM5	0.0432797
PRDM4	0.0277617
CHEK1	-0.246615
HIBADH	-0.0706342
CIT	-0.265814
FGFR1OP	-0.0905783
EMILIN1	-0.0321037
BTN3A2	-0.0399681
BTN3A1	-0.00276877
FOXN3	-0.216956
BTN2A1	-0.00237877
PTPRT	0.0638321
RCAN3	0.0155051
FAF1	-0.00962269
CD160	-0.126158
KIF3A	-0.0690738
POLR3A	0.195542
CLASRP	-0.00303336
CHGA	0.118545
ZWINT	-0.181123
CAPN11	-0.0551224
CAPN10	0.0317684
KPTN	-0.0228442
CDC42EP1	-0.0977545
SLC7A9	-0.023314
PWP1	-0.100027
CHGB	0.0952554
CDC37	-0.432383
IL1RAPL1	-0.0467302
PKIG	-0.242222
KAT7	-0.370025
DMC1	-0.121032
PLAAT3	-0.00324824
GLMN	0.046101
HHLA2	-0.00257463
BVES	0.034047
CORO1A	0.117782
WDR45	-0.152005
FICD	-0.123826
AP4S1	0.106785
LDB3	0.153943
PTP4A3	-0.0432007
LSM6	-0.719306
RABL2B	-0.00878174
RABL2A	-0.189818
CHI3L1	-0.0496642
ERLIN2	-0.0611225
ERG28	0.118378
NUDT6	-0.120518
NUDT4	-0.117452
NUDT5	-0.0549909
NUDT3	-0.00328609
SOX21	0.0544722
FSTL1	-0.00628735
PSIP1	0.0691114
WDHD1	-0.155688
CHI3L2	-0.64927
FAM107A	-0.0652438
STRAP	-0.154733
INSL6	0.207882
ADAMTS7	0.111374
ADAMTS6	0.0590236
BAZ2A	0.048605
BAZ1A	-0.0429565
LZTS1	0.170759
ZNF277	-0.103331
CHIT1	0.0812673
WDR6	-0.165678
SLC2A6	0.14612
MAP4K5	-0.00207836
MAP4K1	0.0499745
INMT	0.110685
RASSF1	-0.23628
PKP3	0.102196
NISCH	0.0480382
CELF3	-0.10128
CHKA	-0.0613927
CEP250	0.0790169
PTENP1	0.17976
ABCB8	0.0871581
SEC23IP	0.0667305
WIF1	-0.109642
SUPT16H	-0.637477
ANXA10	0.0156461
ADCY6	-0.174242
CHKB	-0.0351291
CHEK2	0.0560613
POLI	-0.174267
KLK8	-0.040899
MST1P2	0.2109
CHM	-0.0376023
FZD10	-0.197125
PLPBP	0.133719
IRAK3	-0.0423159
AKAP13	-0.120262
AKAP11	0.0182031
AKAP10	-0.103777
AKAP2	0.0309043
DDX20	-0.172332
TREX2	-0.153419
CHML	-0.3026
DUSP10	-0.0692828
MRPL3	-0.13704
MST1L	-0.264234
RPL35	-1.00749
GALNT6	0.0907853
GALNT5	0.142171
RASSF8	0.134138
CHN1	-0.151619
PRAF2	0.10783
SEC63	-0.0131368
HPS5	-0.139214
PDCD10	0.149322
RNF139	0.0158397
RNF24	-0.0435257
CA5B	-0.0966556
EGLN2	-0.181159
EGLN3	-0.33223
CHN2	-0.0188658
PADI2	0.142681
BIRC8	-0.182242
PMF1	-0.402634
ZHX1	0.188575
GPR176	-0.0272472
CAVIN3	0.0115759
NXPH4	-0.0339842
PRRT2	-0.0928042
ERI2	-0.00247276
NXPH3	-0.0207946
SAT2	-0.0183088
DTD2	-0.0279814
GTF3C6	-0.275908
GPR45	-0.0271004
PTGDR2	-0.201922
PACSIN2	0.093726
MAN1B1	-0.0156451
SLC6A14	-0.286735
HRH3	-0.292375
SNX18	-0.00956929
DCTN3	-0.270784
FILIP1L	0.0665277
XPOT	-0.0297085
MRAP2	0.071278
CHP1	-0.0892743
RWDD2A	0.231614
CMTM7	-0.0763152
SP140	-0.136562
PXMP4	-0.00703248
DUSP12	-0.0603299
SNF8	0.154368
DDX19B	-0.379912
TUBA3E	-0.0202547
PRR4	0.126567
RDH13	0.00699267
ATXN2L	0.0352695
USP18	0.00542178
IL17F	-0.0329134
KLHL2	-0.147152
STX1B	0.00478532
SYNRG	0.0849318
TREX1	-0.00774557
GLMP	-0.0775244
KLF12	-0.260381
KLF8	-0.12927
CHRM1	-0.000963284
SCN11A	-0.0561665
KRT71	0.0845283
POU6F2	0.0974025
FDX2	-0.0694569
HOGA1	0.00564988
MGAT4B	0.1013
CYP4F8	-0.148789
PNKP	-0.178307
WDR89	-0.173623
L3HYPDH	0.0829467
B4GALT7	-0.29739
TP53RK	0.00152176
SGF29	-0.0139448
PHF21B	0.0740034
CHRM2	-0.105317
VPS26B	-0.0989343
GLB1L3	-0.0549035
NACC1	-0.0937682
CFAP36	-0.189281
MED8	-0.713737
ADCY7	0.0166055
LYST	0.0672056
RPUSD1	-0.217644
PLCD3	-0.0715884
SLCO2B1	0.0687851
PTH2	-0.103025
CHRM3	-0.102692
MTFR2	0.0404489
LYPLA2	-0.0919419
CDCA5	-0.418418
CD300A	-0.0288045
PARK7	-0.0144788
COPE	-0.277855
RBPJL	-0.0637671
SAAL1	0.0164865
IZUMO4	0.121081
SCAMP4	-0.0983969
ADAT3	-0.0201806
GPR182	-0.0685309
CHST14	-0.00894154
ECD	-0.272098
CHRM4	-0.106287
MGAT4A	-0.0810738
CASC4	0.216711
GPN1	-0.181248
KIF12	0.0573366
SLC46A1	-0.03175
DDX42	-0.216322
LARP4	0.0535346
VSIG4	0.0220932
GLCCI1	0.0093083
FKBP9	-0.0164381
STK38	0.0676787
CHRM5	-0.0604182
CTRC	-0.0812022
PHB2	-0.836192
ACOT7	-0.0649947
PDAP1	-0.229119
TUSC2	0.0360799
CBX3	-0.0650628
GABARAP	-0.0611061
U2AF2	-1.16344
OIP5	-0.589088
CHRNA1	-0.027139
EXOSC8	-0.375848
TEX261	-0.140342
RNF13	-0.0155501
MGLL	-0.011905
TWF2	-0.109046
GABARAPL2	0.0179899
AZIN2	-0.120385
TUBA3D	0.0678132
SYNPO	-0.00867346
HELQ	0.0149539
CMTM1	0.0867086
CHRNA3	0.107287
CYP2U1	-0.0447258
ADPRHL1	-0.000981867
MFSD3	-0.0346078
SDSL	-0.136422
CHRNA4	0.0740108
ODF3	0.120111
CHRNA5	-0.209894
HENMT1	-0.0339419
SLC35A4	0.0223008
ZNF257	-0.0487609
CHRNA7	0.00808298
ADCY8	0.0447723
CHRNB1	-0.354148
ZIM3	-0.228383
TOE1	0.210063
LINC00310	-0.161585
BUD23	-0.300825
TRIM9	0.0747337
CHRNB2	-0.0206996
TXNRD3	-0.035206
SIGLEC11	0.0828465
SLC2A13	0.129479
CHRNB3	0.0658216
LACTB	-0.0127671
PALM2	0.00613006
CHRNB4	-0.115892
EFHC1	-0.0516355
CHRND	0.0360133
CHRNE	-0.00210692
NLRP3	-0.0216416
MAL2	-0.0266729
SLC22A9	0.035961
CHRNG	-0.0562784
TIRAP	-0.444604
ERMAP	-0.324385
CHUK	0.0907243
CYGB	-0.038715
CARD16	0.0945681
PGLYRP2	-0.109499
PGLYRP3	0.0990272
PKD1L2	-0.285729
BTBD9	-0.0544971
LMTK3	-0.0772805
CSMD2	0.0262436
MBD6	-0.0706515
XKR4	-0.0939963
GPRIN1	-0.0764021
CSMD3	-0.0251366
SLC25A25	0.0459292
STK11IP	-0.144348
KLHL32	0.0347179
FMNL2	0.0451751
ELFN2	0.0718686
TMEM132B	0.129404
SLITRK1	0.0641934
ESCO1	0.0866508
TMEM200A	0.0352732
MYSM1	0.00169687
RNF157	-0.0744679
GALNT13	0.0641502
GNRHR2	0.0869092
SORCS1	0.0427471
KLHL29	-0.00927345
ZBED9	0.130781
RHPN1	0.0557523
LENG8	-0.0918637
PNMA5	0.194907
PWWP2A	-0.0877974
SMYD4	0.0259982
SLAMF6	0.0224718
OSBPL1A	-0.0984909
OSBPL5	0.0484137
OSBPL6	-0.106174
OSBPL7	-0.0105276
OSBPL9	-0.00759644
OSBPL10	0.0228434
OSBPL11	-0.00447012
C1QTNF1	-0.193526
C1QTNF2	-0.0545413
C1QTNF3	0.117268
CIDEA	0.0769027
C1QTNF6	-0.109771
C1QTNF7	-0.0272576
FBXO32	-0.159519
TMEM123	-0.238461
EPB41L4A-AS1	0.0673692
GPRASP2	0.0549672
MRFAP1L1	-0.12887
TSGA13	0.0378186
PTPMT1	-0.140488
WDR31	-0.0270736
VASN	0.039008
ZNF618	-0.112355
ADCY9	-0.133203
CGAS	0.00702645
SLC26A9	0.0481214
NT5C3B	-0.106233
HAUS1	-0.585028
MARCHF3	0.0267901
ZNF554	0.0717656
CKB	-0.200587
ATG4A	0.094088
KCTD12	-0.0982404
OMA1	-0.00919938
DDIT4L	0.0324675
RAB42	0.035134
SLC25A26	-0.00772159
FBXO17	-0.254865
PCMTD1	0.128778
CIRBP	-0.0875392
GPR146	-0.127101
FCRL1	0.038104
FCRL3	-0.252533
GBP4	0.0654982
GBP5	0.0292065
CISH	0.0178061
UHRF2	0.0299708
TBCB	-0.105398
ZNF689	-0.0678833
FCHO2	-0.132046
ARHGEF25	0.043614
ZNF501	-0.0176596
SLC5A11	0.0896
TNFRSF13C	-0.0669022
KIR3DL3	0.184036
ALPK2	-0.0312236
ARHGAP33	-0.0166607
EVI5L	0.0723243
TRMT61A	-0.120255
RASGRP4	-0.0263822
DIS3L	-0.412046
ARL11	-0.413378
FANCD2OS	-0.0265617
CKM	-0.0521758
IQCD	0.00713552
DHRS1	-0.0132324
WDFY2	0.0204414
RAB3C	0.0246783
NXNL1	0.0918054
CKMT1B	-0.347031
CTHRC1	-0.0877847
CCDC151	-0.240307
ZNF653	-0.0896782
RNF166	-0.0239255
ADCYAP1	-0.0502876
CKMT2	-0.0132893
RMI2	-0.0104419
OSR2	0.0565477
BATF2	0.15295
SLC22A12	0.112424
DNTTIP1	-0.041089
DIRC1	-0.260103
ERCC8	0.0505286
FOXP4	-0.0351566
ZNF526	-0.199753
FMO9P	-0.0607136
LRRC3B	-0.0696742
KLHDC3	-0.0750925
WDR92	-0.354291
NUS1	-0.579633
FAM210B	-0.0220931
PHACTR3	0.120079
CYYR1	-0.00940152
TGM7	0.0639445
TM4SF19	0.101158
ZMYND19	0.130244
COX20	0.0203921
ABHD15	-0.179049
TLCD1	-0.172242
GINM1	-0.0142517
MOGAT1	-0.0622969
ACSM1	0.114519
CKS1B	-0.11487
C8orf34	0.0187583
PANX3	0.0700099
RBP7	0.0635012
LYPD1	0.00021084
IL22RA2	0.0377948
CKS2	-0.0988188
TM4SF18	0.0452395
GRIN3A	-0.136437
GRIN3B	-0.19635
TOP1MT	0.0351072
OLIG1	-0.0567012
CLNK	0.0376761
NIBAN1	-0.0899298
MAS1L	-0.113809
MRGPRD	0.101483
APOA5	0.0049183
MRGPRE	-0.249169
MRGPRF	0.0737164
RPL39L	-0.283784
HSPA12B	0.0019828
SNAP47	-0.0882328
LEAP2	0.0681054
SLC18B1	0.0709707
LRG1	0.058222
MED12L	-0.0403069
WDR17	-0.0076165
ART5	-0.136977
ACAP3	-0.000260589
ARAP2	-0.0957595
ARAP1	0.0347609
AGAP2	-0.0943378
AGAP1	0.0425817
AGAP3	-0.0167144
ADCYAP1R1	-0.233963
CATSPER1	-0.0832477
THEM4	-0.0865391
DACH2	-0.000907005
SCGB3A2	-0.0371356
SH2D1B	-0.0917869
WFIKKN1	-0.240523
RAB3IP	-0.284973
SSX2IP	0.0125519
MRGPRX2	-0.012584
MRGPRX3	-0.101635
MRGPRX4	-0.0881984
PLAAT5	0.0265862
FTSJ3	-1.1197
SLC16A10	-6.38083e-05
GALNT15	0.179483
IP6K3	0.039981
DEFB118	0.0334209
CIB3	-0.0733543
TAGAP	-0.0679735
AP2M1	-0.733573
AP1S1	-0.0566396
AP2S1	-0.403856
TMC1	-0.0633832
TMC2	-0.0127557
RLN3	-0.172539
TWIST2	-0.183469
PARD3B	-0.119239
RFFL	0.0632512
AP3S1	-0.0295044
ZNF354B	0.104218
CLC	-0.0353809
TRIM6	-0.0164494
CLCA1	0.0615958
ADD1	-0.0634576
CLCN1	0.0441366
CLCN2	-0.072179
CLCN3	-0.158808
CLCN4	-0.10801
CLCN5	-0.0382516
LINC00161	0.133551
UBE2J2	-0.0997447
PCAT4	-0.0385131
BORCS5	-0.152725
ANTXR2	0.0384936
MUCL1	-0.456728
GPR62	-0.057956
EXOSC6	-0.254597
C10orf71	0.216959
CHCHD1	-0.0844565
CFAP70	0.111116
CLCN6	0.0198413
CLCN7	-0.0380652
BTBD16	-0.0590826
PSTK	-0.039889
CLCNKA	0.0860693
ZNF488	0.0780108
PIK3AP1	-0.0469162
CLCNKB	-0.0968221
MORN4	0.159145
ZFYVE27	-0.0615464
MMP21	0.0638812
COMTD1	-0.0632359
FRA10AC1	0.0479504
ANKRD22	-0.249634
SFXN2	0.0977809
PDZD8	0.042163
ADD2	-0.0342501
AGAP4	-0.0243084
BORCS7	0.0584845
CLU	-0.0806247
LYZL2	0.0147843
CLIC1	-0.13545
CLIC2	0.119246
AGAP11	0.0399704
GSTO2	0.0538248
SFR1	-0.0651398
CALHM3	-0.0509646
CTAGE7P	0.0305473
CLRN3	-0.1046
CLK1	-0.00159623
SFXN4	-0.162499
CPXM2	0.00383446
CLK2	-0.00323108
OR51A7	-0.390357
OR51S1	-0.0466894
OR51F2	-0.0228391
OR52R1	0.126175
CLK2P1	0.0326265
C11orf74	0.136741
OR52M1	0.103804
OR52K2	0.0357779
CLK3	0.0365125
SERPINA3	-0.16524
ADD3	-0.138983
TPP1	-0.02428
OR5P2	-0.0210667
OR5P3	-0.0233153
LARGE2	-0.127224
CLN3	-0.075529
SLC36A4	-0.104736
FAT3	-0.00393416
CYP2R1	0.0148548
CLN5	0.218357
PIH1D2	-0.081165
NXPE1	-0.0253106
NXPE2	0.0870091
JAML	-0.0554889
DNAJC24	0.021219
ARL14EP	-0.118967
CLNS1A	-0.513935
OR2D3	0.0830967
OR2D2	-0.0530921
OR52W1	0.0358767
OR56A4	0.046738
OR56A1	-0.0115846
CLPS	0.0509952
DEPDC4	-0.00230642
LRRK2	-0.120797
CLPTM1	-0.0379186
CCDC38	0.0493589
TMEM52B	0.00486549
FAM186A	0.00322173
C12orf45	-0.411515
CLTA	-0.0439806
CLTB	-0.0442209
SDR9C7	-0.114726
LRIG3	-0.0683508
TMEM132D	0.0514303
SLC15A4	-0.0442548
RHEBL1	-0.140841
C12orf54	0.0875632
ZNF641	0.020895
TPH2	0.185952
CLTC	-1.14576
SP7	-0.0315109
GTSF1	0.120923
KRT74	-0.0536409
NEDD1	-0.659229
IKBIP	0.104945
CMA1	-0.0110914
H4-16	0.314003
ERP27	-0.125781
FGD4	0.0321422
AEBP2	-0.0909303
ASCL4	-0.0124817
BTBD11	-0.0400576
SPIC	0.0610778
ALKBH2	0.0876415
FOXN4	-0.0294951
SPPL3	-0.0324905
TEX29	-0.217962
CSNK1A1L	-0.0742948
RXFP2	-0.127273
SPACA7	0.0101861
TDRD9	-0.0142661
AK7	-0.0149495
C14orf28	0.00590755
TRAPPC6B	0.108859
CLBA1	-0.154754
PLD4	-0.034547
ADSS1	-0.0650337
RNASE11	-0.130993
RNASE8	0.0179927
MRPL52	-0.494714
OR4K14	-0.0539601
OR4L1	-0.197968
OR11H6	-0.260375
LRR1	-0.0564103
KLHDC1	-0.144293
FRMD6	-0.132081
SOCS4	-0.0731684
NAA30	-0.155554
NOXRED1	-0.521348
JDP2	-0.128117
ISCA2	-0.17047
ACOT4	0.100671
PLIN2	-0.0297922
CCR1	0.00498362
TTC8	-0.10445
SLC24A4	0.0186836
SLC25A29	-0.125329
DEGS2	-0.21947
LEO1	-0.101976
CCR3	-0.0636682
SENP8	0.0352908
MTFMT	-0.0640903
SLC51B	0.125243
CCR4	-0.0720886
LRRC28	-0.0645889
CCR5	-0.0233751
CCR6	-0.121342
CCR7	0.00291968
HYKK	-0.00303307
CCR8	-0.0516915
FSD2	-0.0413553
PLA2G4E	0.116928
C16orf46	-0.0158921
ACKR2	-0.0559862
NTAN1	0.142281
FOPNL	-0.125706
DNAAF1	-0.312283
DCUN1D3	0.0187791
NRN1L	0.235185
CMTM3	-0.130765
C16orf78	-0.0924885
ADH1A	0.0326401
CMKLR1	-0.0558832
SPATA33	-0.00691565
NOXO1	0.0138883
CCDC78	-0.147846
LTB4R	-0.128581
ANKRD26P1	0.0647519
ZG16B	0.0814244
PRSS30P	-0.146224
PAQR4	0.0606057
ZC3H18	-0.84274
GPR139	-0.0107781
CDYL2	-0.0410668
ABCC2	-0.0259052
ANKS3	0.141815
SEPTIN12	-0.00519399
ZNF720	0.0950861
TMEM219	-0.0015295
EARS2	-0.102543
TMEM170A	0.0371634
HSF5	-0.0584246
OR4D2	-0.426243
MSI2	0.0210361
SLC38A10	-0.00666434
CANT1	-0.0292982
USH1G	0.0714169
CD300LB	-0.347759
KIF19	-0.028611
CYB5D1	0.0281814
OVCA2	-0.0833
KRBA2	0.110281
C17orf64	0.0156509
SPATA32	-0.471284
HEXIM2	-0.223095
LSM12	-0.1187
CNTD1	-0.0991769
WFIKKN2	-0.297231
B4GALNT2	0.145721
SPACA3	-0.00339487
RSKR	-0.0480481
SEZ6	-0.00032207
ANKRD13B	0.124899
CYB5D2	-0.0998084
ZFP3	0.0425948
GGT6	0.0572902
EFCAB13	0.144451
MRPL10	-0.146818
WDR81	0.0254938
ADH1B	-0.146419
TBC1D16	-0.0229274
AFMID	0.0628741
GJD3	-0.0222502
KRT222	0.104953
KRT40	0.0673029
SNHG29	-0.0493581
SLC5A10	-0.00569773
FAM210A	0.154239
LOXHD1	-0.0385676
INO80C	-0.103039
TTC39C	0.0237446
CNGB1	-0.542049
ZNF816	0.0439552
CNGA1	-0.021458
ZNF543	0.126231
CEACAM20	0.160325
RAVER1	-0.00402485
OR7D4	-0.0372273
COX6B2	0.0406354
CALR3	-0.0774737
ACER1	-0.00983044
MBD3L2	-0.0286883
ADH1C	0.104211
CNGA2	0.116771
OSCAR	-0.245276
ZNF813	0.135531
ZNF441	-0.0411832
ZNF491	-0.0281452
ZNF440	0.0109267
SWSAP1	-0.0321591
CNGA3	-0.164545
IZUMO2	-0.0823467
CPT1C	-0.1516
ALDH16A1	-0.0554308
NTN5	-0.0806671
CNGA4	0.0624264
NLRP13	0.100931
NLRP8	0.0310338
NLRP5	0.00242757
ZNF787	0.107438
ZNF573	0.0138086
WDR88	0.0835067
TMIGD2	0.1766
EID2B	0.0469478
TNFAIP8L1	-0.00868461
ZNF57	0.102941
IRGQ	0.00651388
PLK3	0.0341006
MOB3A	-0.0840406
MFSD12	0.0565682
GIPC3	0.110522
NDUFA11	-0.20914
MISP	0.113714
LRRC25	-0.186682
OR1I1	-0.0861824
ZNF792	0.0340169
HSPB6	0.14045
CNN1	0.142111
CYP4F22	-0.152105
RINL	0.0490964
FBXO27	0.0645189
CNN2	-0.206158
PLK5	-0.0867511
LINC00661	-0.033676
ANKLE1	0.0428498
CNN3	0.0216971
GABPB2	0.197989
TCHHL1	0.130114
RPTN	0.0627401
TDRD10	-0.101639
SHE	-0.0102425
KDF1	0.0652774
CNP	-0.0824749
CCSAP	0.116128
LRRC38	-0.104424
PUSL1	-0.127366
B3GALT6	-0.0601385
CNR1	-0.0229073
WDR63	-0.00488182
AXDND1	0.00250409
MAB21L3	-0.0893114
CNR2	-0.0930213
ADH4	-0.401344
CNTF	0.0190192
ATXN7L2	-0.0423583
LYPLAL1	0.056524
OR2M5	-0.113624
OR2M3	0.106712
OR2T12	0.033131
OR14C36	0.00775738
OR2T10	-0.0541386
OR2T4	-0.265899
OR2T11	-0.54429
CNTFR	0.0210106
ATP6V1G3	-0.0894221
CNTN1	-0.0999982
ASB17	0.128404
TYW3	0.0626117
LRRIQ3	0.0994596
MYOM3	0.0762542
DMBX1	-0.107164
ZNF684	0.103466
TCEANC2	0.0755811
PODN	-0.242883
LRRC39	-0.265861
GJB4	-0.0902557
HMGB4	-0.109623
RNF19B	0.0638253
OR2B11	0.0555615
ZNF648	-0.0137928
TEDDM1	0.0627038
C1orf122	0.0134759
COL1A1	0.00866413
OSCP1	-0.0409722
KLHDC7A	-0.0845204
VWA5B1	-0.230692
UBXN10	0.235111
C1orf87	-0.00662502
COL1A2	0.0564919
ARL8A	0.000479195
SYT2	-0.0677457
UHMK1	0.121796
ADH5	-0.176866
COL2A1	-0.0802192
WDR64	-0.00199834
C1orf131	-0.289994
LIX1L	0.138844
COL3A1	0.0347913
HSD3BP4	0.0337252
EDARADD	-0.247584
COL4A1	-0.0414021
KLF17	-0.0251003
TSACC	0.108109
IQGAP3	-0.0464025
NAXE	0.00466399
ARHGEF19	0.0854198
H2BU1	-0.0806521
DRAM2	-0.119364
C1orf162	-0.0804978
OR10X1	-0.0244382
OR10Z1	0.100868
OR6K6	0.0515848
COL4A2	-0.0734111
BHLHE23	0.0457969
NKAIN4	-0.154592
VSTM2L	0.030082
WFDC12	-0.0571106
COL4A3	-0.118055
OCSTAMP	-0.0532261
TSHZ2	0.110539
COL4A4	-0.0607307
C20orf85	-0.0508722
TBC1D20	-0.0507799
SIRPD	-0.0565715
PROKR2	0.0328938
COL4A5	-0.0798647
SLX4IP	0.0763264
COL4A6	-0.034349
CSTL1	-0.128347
CST9L	0.0649375
CST9	-0.0217979
DUSP15	-0.015398
BPIFB6	0.0776506
BPIFA3	-0.174858
CHMP4B	0.232336
PIGU	-0.10252
HMGB3P1	-0.0263881
COL5A1	0.0771717
TANGO2	0.0299624
COL5A2	0.0369119
ZNF280A	0.0962778
EMID1	-0.166003
COL6A1	-0.097425
COL6A2	0.0252805
PPP1R21	-0.028939
COL6A3	-0.146419
TMEM150A	0.012359
COL7A1	0.0980911
NUP35	0.124712
XIRP2	-0.0597594
TYW5	-0.160778
COL8A1	-0.275865
NMS	-0.075329
LYG1	-0.0148382
DIS3L2	-0.175948
COL8A2	-0.0421579
CMPK2	0.0283312
MBOAT2	-0.109883
CNTNAP5	0.073996
TAF8	-0.325925
[truncated: 14,379 more rows]

## Sheet: 4b
Gene Symbol	Gene effects (mean)
A1BG	0.109663
A1CF	0.042524
A2M	-0.0305703
A2ML1	0.207761
A3GALT2	-0.0609174
A4GALT	-0.0908839
A4GNT	0.137469
AAAS	-0.444128
AACS	0.092196
AADAC	0.172599
AADACL2	0.17836
AADACL3	-0.00125361
AADACL4	-0.0382369
AADAT	0.0413306
PRXL2C	-0.0219898
AAGAB	-0.00136029
AAK1	-0.227957
AAMDC	-0.0292196
AAMP	-0.880301
AANAT	-0.202722
AAR2	-0.00887512
AARD	-0.209564
AARS1	-1.64264
AARS2	-0.941298
AARSD1	-0.206874
AASDH	-0.0226809
AASDHPPT	-0.643065
AASS	0.145614
AATF	-0.650362
AATK	-0.180148
ABAT	-0.0548779
ABCA1	-0.00360056
ABCA10	0.200755
ABCA12	-0.0175993
ABCA13	0.0361521
ABCA2	0.0130154
ABCA3	-0.0111498
ABCA4	-0.117528
ABCA5	-0.0300231
ABCA6	0.184672
ABCA7	0.0749211
ABCA8	-0.0403696
ABCA9	0.172574
ABCB1	-0.104403
ABCB10	-0.4452
ABCB11	0.0315246
ABCB4	-0.0226173
ABCB5	-0.0252929
ABCB6	-0.0140204
ABCB7	-1.11101
ABCB8	0.115905
ABCB9	-0.094263
ABCC1	0.0745896
ABCC10	-0.175144
ABCC11	0.144467
ABCC12	0.118356
ABCC2	-0.0327712
ABCC3	-0.251177
ABCC4	0.0784744
ABCC5	0.112471
ABCC6	-0.18674
ABCC8	0.0254567
ABCC9	0.0669635
ABCD1	-0.209247
ABCD2	0.0464357
ABCD3	-0.129945
ABCD4	-0.188024
ABCE1	-1.05224
ABCF1	-0.979033
ABCF2	-0.17473
ABCF3	0.0479096
ABCG1	-0.537273
ABCG2	0.101755
ABCG4	0.00358555
ABCG5	-0.01803
ABCG8	-0.041584
ABHD1	-0.00505475
ABHD10	0.0462909
ABHD11	-0.677299
ABHD12	0.00408542
ABHD12B	-0.110778
ABHD13	-0.219208
ABHD14A	-0.00472722
ABHD14B	-0.0497834
ABHD15	-0.16315
ABHD16A	-0.171471
ABHD16B	-0.0361047
ABHD17A	-0.522361
ABHD17B	0.108157
ABHD17C	0.0883752
ABHD18	0.0918529
ABHD2	-0.185046
ABHD3	-0.043504
ABHD4	0.0671604
ABHD5	0.0124815
ABHD6	0.0322122
ABHD8	-0.107896
ABI1	-0.065652
ABI2	0.0727007
ABI3	0.0385364
ABI3BP	0.18349
ABL1	-0.126276
ABL2	0.199811
ABLIM1	0.0283543
ABLIM2	-0.00944959
ABLIM3	0.0748821
ABR	0.0101952
ABRA	-0.129093
ABRACL	0.0689104
ABRAXAS1	-0.237959
ABRAXAS2	0.185046
ABT1	-0.469603
ABTB1	0.0490449
ABTB2	0.0482277
ACAA1	-0.0308952
ACAA2	-0.0975916
ACACA	-0.431118
ACACB	-0.112832
ACAD10	0.0160451
ACAD11	0.0617681
ACAD8	0.248364
ACAD9	-0.293163
ACADL	-0.123857
ACADM	-0.013431
ACADS	-0.15302
ACADSB	-0.217954
ACADVL	-0.0195904
ACAN	-0.0198513
ACAP1	-0.155882
ACAP2	0.104987
ACAP3	-0.201622
ACAT1	0.155658
ACAT2	0.213096
ACBD3	-0.0875817
ACBD4	-0.0438198
ACBD5	-0.00648028
ACBD6	0.0829166
ACBD7	0.130373
ACCS	0.0899151
ACCSL	-0.105719
ACD	-0.378633
ACE	-0.214697
ACE2	0.16545
ACER1	0.203832
ACER2	0.0948219
ACER3	0.115716
ACHE	-0.247997
ACIN1	-0.78676
ACKR1	-0.10382
ACKR2	0.0991883
ACKR3	0.189599
ACKR4	-0.131176
ACLY	-0.528027
ACMSD	0.12393
ACO1	0.15003
ACO2	-0.804459
ACOD1	-0.0289837
ACOT1	0.214791
ACOT11	-0.0125816
ACOT12	-0.384856
ACOT13	-0.082245
ACOT2	0.0884485
ACOT4	-0.239628
ACOT6	-0.0710869
ACOT7	-0.0103755
ACOT8	-0.0978017
ACOT9	0.107469
ACOX1	-0.191986
ACOX2	-0.0598626
ACOX3	-0.0578959
ACOXL	-0.207712
ACP1	0.177903
ACP2	0.186976
ACP4	0.118035
ACP5	0.0480083
ACP6	-0.125372
ACP7	-0.127079
ACPP	0.0487803
ACR	-0.160263
ACRBP	-0.0315892
ACRV1	0.34908
ACSBG1	0.0371634
ACSBG2	-0.0470683
ACSF2	-0.152243
ACSF3	-0.0336212
ACSL1	0.00704658
ACSL3	-0.355752
ACSL4	-0.0838012
ACSL5	0.0603769
ACSL6	-0.0208999
ACSM1	0.119291
ACSM2A	0.10079
ACSM2B	0.352986
ACSM3	-0.0417029
ACSM4	0.205671
ACSM5	0.103354
ACSM6	-0.0887588
ACSS1	0.0850397
ACSS2	0.245865
ACSS3	0.0661887
ACTA1	-0.250221
ACTA2	0.0484025
ACTB	-0.950079
ACTBL2	0.0554504
ACTC1	-0.0592421
ACTG1	-0.451539
ACTG2	0.0613802
ACTL10	0.0995373
ACTL6A	-1.22794
ACTL6B	-0.00816075
ACTL7A	-0.27974
ACTL7B	-0.0668453
ACTL8	-0.0919182
ACTL9	-0.0406055
ACTN1	-0.14589
ACTN2	-0.0707916
ACTN4	0.0212761
ACTR10	-0.821978
ACTR1A	-1.13897
ACTR1B	-0.595746
ACTR2	-1.22772
ACTR3	-0.485987
ACTR3B	0.0961515
ACTR3C	-0.154958
ACTR5	-0.399206
ACTR6	-1.00671
ACTR8	-0.962896
ACTRT1	0.0529981
ACTRT2	0.0786317
ACTRT3	0.0147499
ACVR1	0.165913
ACVR1B	-0.105909
ACVR1C	0.107817
ACVR2A	-0.00654501
ACVR2B	0.091016
ACVRL1	0.0120067
ACY1	0.0471299
ACY3	-0.025091
ACYP1	-0.0668079
ACYP2	0.110813
ADA	0.119022
ADA2	-0.0924723
ADAD1	0.0108445
ADAD2	-0.0616667
ADAL	0.0061369
ADAM10	-0.077571
ADAM11	-0.372755
ADAM12	-0.0848907
ADAM15	-0.0391238
ADAM17	0.0194768
ADAM18	0.132045
ADAM19	0.17675
ADAM2	0.0995856
ADAM20	0.112095
ADAM21	0.0348427
ADAM22	-0.0162907
ADAM23	0.0708105
ADAM28	0.119667
ADAM29	0.182227
ADAM30	-0.227159
ADAM32	0.209374
ADAM33	-0.0537066
ADAM7	-0.0706733
ADAM8	0.140992
ADAM9	0.0139254
ADAMDEC1	0.111733
ADAMTS1	-0.0677516
ADAMTS10	-0.295474
ADAMTS12	0.106251
ADAMTS13	-0.145334
ADAMTS14	0.0416661
ADAMTS15	-0.0296083
ADAMTS16	0.0436071
ADAMTS17	0.106797
ADAMTS18	0.0592432
ADAMTS19	0.156488
ADAMTS2	-0.0505486
ADAMTS20	0.0336761
ADAMTS3	-0.0708403
ADAMTS4	-0.103892
ADAMTS5	0.083924
ADAMTS6	0.0561166
ADAMTS7	-0.359018
ADAMTS8	0.00399363
ADAMTS9	0.0694707
ADAMTSL1	-0.0377778
ADAMTSL2	-0.0569698
ADAMTSL3	0.0747484
ADAMTSL4	-0.13116
ADAMTSL5	-0.251803
ADAP1	-0.150496
ADAP2	-0.288449
ADAR	-0.668612
ADARB1	-0.00208354
ADARB2	0.0565245
ADAT1	-0.226035
ADAT2	-0.781443
ADAT3	-0.647
ADCK1	0.244582
ADCK2	-0.022217
ADCK5	0.0483895
ADCY1	0.0810315
ADCY10	0.0474599
ADCY2	0.128455
ADCY3	-0.346066
ADCY4	-0.236135
ADCY5	0.107112
ADCY6	0.0886032
ADCY7	0.180613
ADCY8	-0.0393401
ADCY9	0.0343726
ADCYAP1	0.22612
ADCYAP1R1	-0.0849194
ADD1	0.0775227
ADD2	-0.131991
ADD3	0.0318584
ADGRA1	0.140246
ADGRA2	-0.133022
ADGRA3	-0.156495
ADGRB1	0.0103235
ADGRB2	-0.0571065
ADGRB3	0.0551322
ADGRD1	-0.100558
ADGRE1	-0.117032
ADGRE2	-0.20814
ADGRE3	0.0274835
ADGRE5	-0.0761032
ADGRF1	0.0545663
ADGRF3	-0.0588345
ADGRF4	0.0147524
ADGRF5	-0.305299
ADGRG1	-0.0778483
ADGRG2	0.140725
ADGRG3	-0.235341
ADGRG4	0.0495001
ADGRG5	-0.0463979
ADGRG6	0.278921
ADGRG7	-0.0371188
ADGRL1	0.0782215
ADGRL2	-0.0260855
ADGRL3	-0.0143684
ADGRL4	0.149477
ADGRV1	0.0630909
ADH1A	0.00555197
ADH1B	-0.0322096
ADH4	0.0214316
ADH5	-0.025197
ADH6	0.207328
ADH7	0.096163
ADHFE1	0.155757
ADI1	-0.0490121
ADIG	0.0691668
ADIPOQ	0.042101
ADIPOR1	-0.0353891
ADIPOR2	0.139561
ADIRF	-0.0331435
ADK	-0.0498072
ADM	0.166483
ADM2	-0.0404263
ADM5	-0.145489
ADNP	-0.451428
ADNP2	0.0854896
ADO	-0.087531
ADORA1	-0.058235
ADORA2A	-0.139625
ADORA2B	-0.0942516
ADPGK	-0.0347784
ADPRH	-0.22111
ADPRHL1	-0.245899
ADPRHL2	-0.240461
ADPRM	0.152766
ADRA1A	0.201259
ADRA1B	0.0857142
ADRA1D	-0.0228953
ADRA2A	-0.0152423
ADRA2B	-0.146762
ADRA2C	0.020718
ADRB1	0.0551422
ADRB2	-0.0736474
ADRB3	0.0299253
ADRM1	-0.514406
ADSL	-0.99174
ADSS2	-0.245443
ADSS1	-0.212949
ADTRP	-0.00188726
AEBP1	-0.315714
AEBP2	-0.102432
AEN	0.0981993
TLE5	-0.19498
AFAP1	0.162189
AFAP1L1	-0.0651887
AFAP1L2	-0.0473808
AFDN	-0.0540637
AFF1	0.148069
AFF2	0.116391
AFF3	-0.223494
AFF4	-0.0675681
AFG1L	-0.0372979
AFG3L2	-1.08042
AFM	0.0373454
AFMID	-0.0730427
AFP	-0.0342259
AFTPH	-0.024081
AGA	0.150887
AGAP1	-0.139013
AGAP2	-0.358864
AGAP3	0.105223
AGAP5	-0.669681
AGAP6	-0.78257
AGAP9	-0.272306
AGBL1	0.0494372
AGBL2	-0.134447
AGBL3	-0.0414744
AGBL4	-0.302492
AGBL5	-0.192957
AGER	0.105714
AGFG1	-0.0198511
AGFG2	-0.272536
AGGF1	0.125976
AGK	0.169433
AGL	-0.106379
AGMAT	-0.15894
AGMO	0.0617585
AGO1	-0.311243
AGO2	-0.208441
AGO3	-0.0526102
AGO4	0.0370014
AGPAT1	-0.0551273
AGPAT2	-0.0708726
AGPAT3	-0.0631089
AGPAT4	0.0471275
AGPAT5	0.0924094
AGPS	0.0299218
AGR2	0.00710896
AGR3	0.136553
AGRN	-0.271534
AGRP	-0.00633013
AGT	-0.0744833
AGTPBP1	0.251641
AGTR1	-0.138222
AGTR2	0.0857552
AGTRAP	0.0353187
AGXT	-0.0918367
AGXT2	-0.0111134
AHCTF1	-0.956238
AHCY	-0.854582
AHCYL1	-0.349717
AHCYL2	0.0126661
AHDC1	-0.173056
AHI1	-0.0329674
AHNAK	-0.191849
AHNAK2	0.225889
AHR	0.0267439
AHRR	-0.182006
AHSA1	-0.130681
AHSG	0.0866218
AHSP	-0.0281883
AICDA	0.0107579
AIDA	0.2866
AIF1	-0.285592
AIF1L	-0.223574
AIFM1	-1.07765
AIFM2	-0.0704037
AIFM3	-0.275294
AIG1	-0.0316097
AIM2	-0.00900049
AIMP1	-0.0232942
AIMP2	-0.201184
AIP	-0.283989
AIPL1	-0.0443831
AIRE	0.0790938
AJAP1	0.0145988
AJM1	-0.258368
AJUBA	-0.154857
AK1	-0.316781
AK2	0.0420692
AK3	0.0743369
AK4	-0.261152
AK5	0.0562168
AK6	-1.29901
AK7	-0.0639296
AK8	-0.131271
AK9	0.0230087
AKAIN1	0.374913
AKAP1	0.0387425
AKAP10	-0.0386952
AKAP11	0.079793
AKAP12	0.023982
AKAP13	-0.0439974
AKAP14	0.100282
AKAP17A	-0.0647357
AKAP2	-0.0401412
AKAP3	-0.0128472
AKAP4	0.105926
AKAP5	0.0626676
AKAP6	-0.0474346
AKAP7	-0.093972
AKAP8	-0.10674
AKAP8L	-0.217426
AKAP9	0.0624631
AKIP1	-0.0450693
AKIRIN1	-0.362171
AKIRIN2	-0.848099
AKNA	-0.0344413
AKNAD1	0.00387776
AKR1A1	-0.11929
AKR1B1	0.331596
AKR1B10	0.0251422
AKR1B15	0.085537
AKR1C1	-0.152812
AKR1C2	0.219627
AKR1C3	0.0287849
AKR1C4	0.0558327
AKR1D1	0.000317901
AKR1E2	0.0585483
AKR7A2	-0.085565
AKR7A3	-0.325504
AKT1	-0.034465
AKT1S1	-0.012992
AKT2	-0.150408
AKT3	0.187809
AKTIP	-0.0906366
ALAD	-0.154624
ALAS1	-0.151235
ALAS2	0.12545
ALB	0.0499949
ALCAM	0.0395629
ALDH16A1	-0.102237
ALDH18A1	-0.286361
ALDH1A1	-0.0109051
ALDH1A2	0.0067846
ALDH1A3	0.169918
ALDH1B1	-0.116909
ALDH1L1	-0.13166
ALDH1L2	0.0879507
ALDH2	-0.0954159
ALDH3A1	-0.095328
ALDH3A2	0.0481104
ALDH3B2	-0.211401
ALDH4A1	-0.0725384
ALDH5A1	-0.104245
ALDH6A1	-0.180184
ALDH7A1	-0.124973
ALDH8A1	-0.0941271
ALDH9A1	0.198212
ALDOA	-1.25323
ALDOB	-0.0719737
ALDOC	-0.200617
ALG1	-1.11713
ALG10	-0.0776752
ALG10B	0.0524295
ALG11	-1.48259
ALG12	-0.37735
ALG13	-1.66959
ALG14	-1.13623
ALG1L	-0.857352
ALG2	-1.40925
ALG3	0.095121
ALG5	-0.310765
ALG6	-0.340513
ALG8	-0.423258
ALG9	-0.0599609
ALK	-0.19869
ALKAL1	0.0113696
ALKAL2	0.218978
ALKBH1	-0.214837
ALKBH2	0.129624
ALKBH3	-0.0472036
ALKBH4	-0.173987
ALKBH5	-0.13637
ALKBH6	-0.0283774
ALKBH7	-0.175699
ALKBH8	0.0401518
ALLC	-0.0787015
ALMS1	-0.00611954
ALOX12	0.117559
ALOX12B	0.0389301
ALOX15	-0.107601
ALOX15B	0.148059
ALOX5	-0.0948092
ALOX5AP	0.123918
ALOXE3	-0.164163
ALPG	-0.008144
ALPI	0.00604692
ALPK1	0.0332362
ALPK2	0.106136
ALPK3	0.0732424
ALPL	-0.0037787
ALPP	0.115783
ALS2	0.194604
ALS2CL	-0.0177837
FLACC1	-0.0528291
ALX1	-0.143144
ALX3	-0.321242
ALX4	-0.254632
ALYREF	-0.701073
AMACR	0.0970979
AMBN	-0.0928886
AMBP	-0.0661895
AMBRA1	-0.358051
AMD1	-0.295005
AMDHD1	-0.0566133
AMDHD2	0.0345953
AMELX	0.120188
AMER1	0.150419
AMER2	-0.329909
AMER3	-0.131852
AMFR	-0.27098
AMH	0.00486134
AMHR2	-0.085483
AMIGO1	0.0347864
AMIGO2	0.121449
AMIGO3	0.0303466
AMMECR1	0.0751466
AMMECR1L	-0.000879146
AMN	0.0271706
AMN1	0.115879
AMOT	0.0566861
AMOTL1	0.0150432
AMOTL2	0.0779192
AMPD1	-0.0406481
AMPD2	0.0190751
AMPD3	-0.0473915
AMPH	-0.0160499
AMT	0.129805
AMTN	0.038957
AMY2A	-0.260972
AMY2B	-0.164724
AMZ1	-0.113933
AMZ2	0.167431
ANAPC1	-0.970964
ANAPC10	-0.512822
ANAPC11	-1.53879
ANAPC13	-0.726623
ANAPC15	-0.824623
ANAPC16	0.0108943
ANAPC2	-1.30053
ANAPC4	-1.37547
ANAPC5	-0.896438
ANAPC7	-0.138766
ANG	-0.13356
ANGEL1	-0.120564
ANGEL2	-0.0181266
ANGPT1	0.0428441
ANGPT2	-0.0354688
ANGPT4	0.335164
ANGPTL1	0.0174942
ANGPTL2	0.0675162
ANGPTL3	0.0326416
ANGPTL4	-0.0632462
ANGPTL5	0.0802096
ANGPTL6	-0.16723
ANGPTL7	-0.0571611
ANGPTL8	-0.0195236
ANHX	-0.137764
ANK1	0.112905
ANK2	0.10466
ANK3	-0.0418437
ANKAR	0.178296
ANKDD1A	-0.0275661
ANKDD1B	0.14386
ANKEF1	0.100087
ANKFN1	-0.0274156
ANKFY1	-0.0464989
ANKH	-0.0856812
ANKHD1	-0.151276
ANKIB1	-0.0650235
ANKK1	0.0214143
ANKLE1	-0.205923
ANKLE2	-1.88993
ANKMY1	0.102692
ANKMY2	-0.0663921
ANKRA2	-0.12291
ANKRD1	0.0717564
ANKRD10	-0.0196631
ANKRD11	-0.466851
ANKRD12	0.0891228
ANKRD13A	-0.113082
ANKRD13B	0.176338
ANKRD13C	-0.0100354
ANKRD13D	0.0640799
ANKRD16	-0.123976
ANKRD17	-0.341325
ANKRD18A	0.00698355
ANKRD2	0.00503949
ANKRD22	-0.223238
ANKRD23	-0.17183
ANKRD24	-0.269925
ANKRD26	0.243487
ANKRD27	0.0656372
ANKRD28	0.145354
ANKRD29	0.0857957
ANKRD30A	-0.0544872
ANKRD30B	-0.021274
ANKRD31	-0.275759
ANKRD33	-0.160089
ANKRD33B	-0.068554
ANKRD34A	-0.103812
ANKRD34B	-0.0582668
ANKRD34C	0.0225858
ANKRD35	-0.194266
ANKRD36B	-0.818845
ANKRD37	0.0343204
ANKRD39	-0.140571
ANKRD40	-0.200849
ANKRD42	0.00815338
ANKRD44	-0.0663426
ANKRD45	0.141302
ANKRD46	0.0537517
ANKRD49	-0.860393
ANKRD50	-0.00179142
ANKRD52	-0.280983
ANKRD53	-0.125653
ANKRD54	-0.285604
ANKRD55	-0.00422677
ANKRD6	0.00260322
ANKRD61	0.0856567
ANKRD62	0.0182396
ANKRD65	0.0187598
ANKRD66	0.0416952
ANKRD7	-0.020019
ANKRD9	-0.0358739
ANKS1A	0.0688415
ANKS1B	0.107137
ANKS3	-0.10041
ANKS4B	0.0829302
ANKS6	-0.467715
ANKZF1	-0.101796
ANLN	-0.664335
ANO1	-0.205092
ANO10	0.163122
ANO2	-0.0746972
ANO3	0.103591
ANO4	-0.10671
ANO5	-0.0882945
ANO6	0.0365992
ANO7	0.0712412
ANO8	-0.0230203
ANO9	0.126507
ANOS1	0.0856638
ANP32A	-0.213197
ANP32B	-0.137874
ANP32D	-0.077361
ANP32E	-0.230952
ANPEP	-0.066638
ANTXR1	0.0860319
ANTXR2	0.0626839
ANTXRL	-0.341298
ANXA1	0.125404
ANXA10	0.015917
ANXA11	-0.145509
ANXA13	-0.0103699
ANXA2	0.0971685
ANXA2R	-0.0847246
ANXA3	0.0679532
ANXA4	0.116615
ANXA5	0.145602
ANXA6	-0.0516929
ANXA7	-0.125349
ANXA8	-0.0253053
ANXA8L1	-0.177971
ANXA9	-0.295852
AOAH	0.292263
AOC1	-0.0782812
AOC2	-0.258135
AOC3	-0.230635
AOX1	0.106866
AP1AR	0.10428
AP1B1	-0.142142
AP1G1	-0.053024
AP1G2	-0.441053
AP1M1	-0.061276
AP1M2	-0.0917009
AP1S1	-0.24557
AP1S2	0.244305
AP1S3	-0.185051
AP2A1	-0.145459
AP2A2	0.252866
AP2B1	-0.101356
AP2M1	-0.688502
AP2S1	-0.902473
AP3B1	-0.203885
AP3B2	-0.0509895
AP3D1	-0.042892
AP3M1	-0.138822
AP3M2	-0.258827
AP3S1	-0.168895
AP3S2	-0.14593
AP4B1	0.0290149
AP4E1	-0.0636125
AP4M1	0.094815
AP4S1	-0.254308
AP5B1	-0.0313857
AP5M1	0.110469
AP5S1	0.0402392
AP5Z1	-0.0457408
APAF1	-0.0654753
APBA1	-0.0450856
APBA2	0.00503949
APBA3	0.176754
APBB1	0.00319033
APBB1IP	0.0713026
APBB2	0.0187867
APBB3	-0.0481008
APC	-0.488227
APC2	-0.142731
APCDD1	0.203536
APCDD1L	0.177177
APCS	-0.147033
APEH	-0.15178
APEX1	-0.0425456
APEX2	-0.314813
APH1A	-0.00924392
APH1B	0.00614787
API5	-0.290803
APIP	0.0449999
APLF	0.0530894
APLN	0.222292
APLNR	-0.246308
APLP1	-0.198116
APLP2	0.137538
APMAP	0.0248772
APOA1	-0.058735
APOA2	-0.00619923
APOA4	0.0747986
APOA5	-0.0564203
APOB	0.180876
APOBEC1	-0.105732
APOBEC2	-0.117305
APOBEC3A	-0.0261664
APOBEC3B	-0.118486
APOBEC3C	-0.0165826
APOBEC3D	-0.217828
APOBEC3F	0.0400296
APOBEC3G	-0.219058
APOBEC3H	-0.0485511
APOBEC4	0.0888872
APOBR	-0.0628409
APOC1	-0.316184
APOC2	-0.151703
APOC3	0.0905689
APOC4	0.0343799
APOD	-0.12304
APOE	-0.158293
APOF	-0.121677
APOH	0.0493016
APOL1	-0.0543983
APOL2	-0.0625405
APOL3	0.0896791
APOL5	-0.105719
APOL6	0.0826207
APOLD1	-0.126049
APOM	-0.112489
APOO	0.0845071
APOOL	-0.0435433
COA8	-0.12282
APP	-0.00909206
APPBP2	0.0896895
APPL1	0.0155616
APPL2	0.145367
APRT	-0.239198
APTX	-0.0340412
AQP1	0.120135
AQP10	-0.20802
AQP11	0.132029
AQP12B	-0.171318
AQP2	-0.127962
AQP3	-0.160277
AQP4	0.084067
AQP5	-0.119937
AQP6	-0.244183
AQP7	-0.948141
AQP8	0.113031
AQP9	-0.173907
AQR	-1.05776
AR	-0.0131369
ARAF	-0.045964
ARAP1	-0.0521802
ARAP2	0.134063
ARAP3	0.105993
ARC	0.102255
ARCN1	-1.20737
AREG	0.0300771
AREL1	-0.285103
ARF1	-0.445601
ARF3	-0.309696
ARF4	-0.522708
ARF5	0.00597319
ARF6	-0.441974
ARFGAP1	0.0314806
ARFGAP2	-0.123478
ARFGAP3	0.109913
ARFGEF1	-0.173948
ARFGEF2	0.0471733
ARFGEF3	0.0101079
ARFIP1	0.0396302
ARFIP2	-0.0665107
ARFRP1	-0.7333
ARG1	0.142187
ARG2	0.0528853
ARGFX	-0.656691
ARGLU1	-0.810549
ARHGAP1	-0.157653
ARHGAP10	0.213504
ARHGAP11A	-0.198648
ARHGAP11B	-0.338639
ARHGAP12	0.0438111
ARHGAP15	-0.00420405
ARHGAP17	0.115885
ARHGAP18	0.162301
ARHGAP19	-0.0577043
ARHGAP20	0.172746
ARHGAP21	-0.128096
ARHGAP22	0.0351285
ARHGAP23	-0.420122
ARHGAP24	0.15237
ARHGAP25	-0.0462497
ARHGAP26	0.182465
ARHGAP27	-0.0753886
ARHGAP28	0.118199
ARHGAP29	-0.115514
ARHGAP30	-0.004346
ARHGAP31	-0.0603019
ARHGAP32	0.145835
ARHGAP33	-0.0783647
ARHGAP35	0.288905
ARHGAP36	0.0817454
ARHGAP39	0.0237075
ARHGAP4	0.0659142
ARHGAP44	0.282654
ARHGAP45	-0.0613037
ARHGAP5	-0.250629
ARHGAP6	0.0781479
ARHGAP8	-0.0589912
ARHGAP9	-0.460681
ARHGDIA	-0.150265
ARHGDIB	0.179641
ARHGDIG	0.0202125
ARHGEF1	-0.0908381
ARHGEF10	0.0881981
ARHGEF10L	0.00114381
ARHGEF11	-0.256473
ARHGEF12	0.110375
ARHGEF15	0.0324389
ARHGEF16	-0.121927
ARHGEF17	-0.053182
ARHGEF18	0.1124
ARHGEF19	-0.106572
ARHGEF2	-0.145457
ARHGEF25	-0.117229
ARHGEF26	-0.0610136
ARHGEF28	-0.161596
ARHGEF3	0.0270223
ARHGEF33	-0.219199
ARHGEF35	0.264871
ARHGEF37	0.141109
ARHGEF38	0.102208
ARHGEF39	-0.0852509
ARHGEF4	-0.0194911
ARHGEF40	-0.200382
ARHGEF5	-0.266136
ARHGEF6	0.222127
ARHGEF7	-0.651828
ARHGEF9	0.0872513
ARID1A	-0.256783
ARID1B	-0.0835843
ARID2	-0.42019
ARID3A	-0.45065
ARID3B	-0.314667
ARID3C	-0.2278
ARID4A	-0.0672654
ARID4B	-0.163613
ARID5A	-0.163132
ARID5B	-0.0428157
ARIH1	-1.33906
ARIH2	0.0804851
ARIH2OS	-0.0541965
ARL1	0.0664246
ARL10	-0.133789
ARL11	-0.0791994
ARL13A	0.0906903
ARL13B	-0.13054
ARL14	0.0783723
ARL14EP	0.0618146
ARL14EPL	0.0923839
ARL15	0.134133
ARL16	-0.0409819
ARL2	-1.44276
ARL2BP	-0.0276039
ARL3	-0.00951586
ARL4A	-0.0216369
ARL4C	-0.041493
ARL4D	-0.51094
ARL5A	0.10775
ARL5B	0.169683
ARL5C	-0.23333
ARL6	0.150627
ARL6IP1	0.098051
ARL6IP4	-0.159772
ARL6IP5	-0.151587
ARL6IP6	-0.149405
ARL8A	-0.0103402
ARL8B	-0.234522
ARL9	-0.0857092
ARMC1	0.332148
ARMC10	-0.198012
ARMC12	-0.169896
ARMC2	-0.00644664
ARMC3	0.113361
ARMC4	0.054425
ARMC5	-0.389938
ARMC6	-0.394935
ARMC7	-1.28874
ARMC8	0.176706
ARMC9	0.0202842
ARMCX1	0.0850609
ARMCX2	-0.0487473
ARMCX3	0.0422449
ARMCX4	0.363367
ARMCX5	0.0332024
ARMCX6	-0.0986
ARMH1	-0.340592
ARMH2	0.055977
ARMH3	-0.174391
ARMH4	-0.0186743
ARMS2	0.0443521
ARMT1	0.0170671
ARNT	-0.059961
ARNT2	0.0827477
ARNTL	-0.163148
ARNTL2	-0.0676736
ARPC1A	-0.00940272
ARPC1B	0.154233
ARPC2	-0.471417
ARPC3	-0.666913
ARPC4	-0.824162
ARPC5	-0.135729
ARPC5L	-0.0279677
ARPIN	0.0652428
ARPP19	-0.303315
ARPP21	0.124747
ARR3	-0.00203977
ARRB1	-0.161753
ARRB2	-0.00291712
ARRDC1	-0.187392
ARRDC2	-0.204887
ARRDC3	0.127395
ARRDC4	0.0629582
ARRDC5	-0.141544
ARSA	-0.350829
ARSB	-0.266517
ARSD	0.213805
ARSL	0.0588926
ARSF	0.038748
ARSG	0.325715
ARSH	0.094981
ARSI	-0.27606
ARSJ	0.0862962
ARSK	-0.132312
ART1	-0.00573829
ART3	-0.121287
ART4	-0.0416142
ART5	0.00290275
ARTN	-0.0811334
ARV1	-0.139032
ARVCF	-0.0955482
ARX	0.0270782
AS3MT	-0.0181802
ASAH1	-0.0483438
ASAH2	0.131057
ASAH2B	-0.202212
ASAP1	0.174829
ASAP2	0.190595
ASAP3	-0.158938
ASB1	0.11148
ASB10	-0.0229754
ASB11	0.147597
ASB12	0.0280154
ASB13	0.190521
ASB14	0.0657738
ASB15	0.297932
ASB16	-0.219223
ASB17	0.00877839
ASB18	0.063667
ASB2	0.268673
ASB3	0.0527139
ASB4	0.225682
ASB5	0.125313
ASB6	-0.436398
ASB7	-0.081335
ASB8	-0.184524
ASB9	0.0237836
ASCC1	-0.202651
ASCC2	-0.00248735
ASCC3	-0.238488
ASCL1	-0.126886
ASCL2	0.0711103
ASCL3	0.155393
ASCL4	-0.0999977
ASCL5	-0.325742
ASF1A	-0.240769
ASF1B	-0.495283
ASGR1	0.128025
ASGR2	0.056099
ASH1L	-0.194287
ASH2L	-0.363079
ASIC1	-0.217169
ASIC2	-0.166677
ASIC3	0.110547
ASIC4	-0.202046
ASIC5	0.134555
ASIP	-0.0560134
ASL	-0.224522
ASMT	-0.0893812
ASMTL	-0.115078
GET3	-1.06365
ASNS	-0.200605
ASNSD1	-0.11172
ASPA	0.218494
ASPDH	-0.00509356
ASPG	0.101265
ASPH	0.208694
ASPHD1	-0.126156
ASPHD2	-0.0776672
ASPM	-0.410454
ASPRV1	-0.155807
ASPSCR1	-0.356298
ASRGL1	-0.0427577
ASS1	-0.365939
ASTE1	0.0884061
ASTL	-0.0644834
ASTN1	-0.0434112
ASTN2	0.0226821
ASXL1	-0.0125837
ASXL3	0.0405867
ASZ1	-0.111798
ATAD1	0.456887
ATAD2	-0.087128
ATAD2B	0.160621
ATAD3A	-0.149283
ATAD3B	-0.220998
ATAD3C	0.139161
ATAD5	-0.120615
ATAT1	-0.0993103
ATCAY	-0.206102
ATE1	-0.0230568
ATF1	-0.28554
ATF2	0.190479
ATF3	-0.108485
ATF4	-0.779823
ATF5	-0.267946
ATF6	-0.116773
ATF6B	-0.278149
ATF7	-0.131182
ATF7IP	-0.241402
ATF7IP2	0.0135115
ATG10	-0.0967267
ATG101	-0.187614
ATG12	0.0225161
ATG13	-0.240142
ATG14	-0.176087
ATG16L1	-0.00852844
ATG16L2	-0.211757
ATG2A	-0.437831
ATG2B	0.0973943
ATG3	-0.128858
ATG4A	-0.0723239
ATG4B	-0.192232
ATG4C	-0.014887
ATG4D	-0.190131
ATG5	0.265684
ATG7	0.0259759
ATG9A	-0.207093
ATIC	-0.453487
ATL1	-0.0502814
ATL2	-0.806518
ATL3	0.0234063
ATM	-0.188114
ATMIN	-0.35287
ATN1	-0.241984
ATOH1	0.0607232
ATOH7	-0.167689
ATOH8	0.0474145
ATOX1	0.0658836
ATP10A	0.0043623
ATP10B	0.0149171
ATP10D	0.0106874
ATP11A	-0.00294425
ATP11B	0.0357463
ATP11C	0.168824
ATP12A	-0.0644835
ATP13A1	-0.19859
ATP13A2	-0.0510608
ATP13A3	-0.12827
ATP13A4	-0.055483
ATP13A5	0.0897276
ATP1A1	-1.50635
ATP1A2	0.121255
ATP1A3	-0.231248
ATP1A4	0.00360499
ATP1B1	-0.0961995
ATP1B2	-0.129447
ATP1B3	-0.373298
ATP1B4	-0.201456
ATP23	-0.345008
ATP2A1	-0.098665
ATP2A2	-1.4899
ATP2A3	-0.0579794
ATP2B1	-0.16242
ATP2B2	-0.0408777
ATP2B3	-0.0849323
ATP2B4	-0.280134
ATP2C1	-0.0896967
ATP2C2	-0.0747902
ATP4A	-0.0362339
ATP4B	0.145977
ATP5F1A	-0.638696
ATP5F1B	-0.950715
ATP5F1C	-0.862332
ATP5F1D	-0.93163
ATP5F1E	-0.954999
ATP5IF1	-0.168527
ATP5MC1	-0.452316
ATP5MC2	-0.167914
ATP5MC3	0.0771385
ATP5MD	-0.202015
ATP5ME	-1.00302
ATP5MF	-0.855201
ATP5MG	-0.648362
ATP5MGL	-0.244366
ATP5MPL	0.169906
ATP5PB	-0.675627
ATP5PD	-0.254799
ATP5PF	-0.544853
ATP5PO	-0.589035
DMAC2L	0.161925
ATP6AP1	-1.38277
ATP6AP1L	0.016093
ATP6AP2	-1.39582
ATP6V0A1	-0.198903
ATP6V0A2	-0.135777
ATP6V0A4	-0.00996326
ATP6V0B	-1.44505
ATP6V0C	-1.68255
ATP6V0D1	-0.442042
ATP6V0D2	0.092261
ATP6V0E1	-0.34785
ATP6V0E2	0.169125
ATP6V1A	-1.36174
ATP6V1B1	-0.0839991
ATP6V1B2	-1.67104
ATP6V1C1	-0.643029
ATP6V1C2	0.0954924
ATP6V1D	-0.657047
ATP6V1E1	-0.967603
ATP6V1E2	-0.087317
ATP6V1F	-1.6595
ATP6V1G1	-1.29532
ATP6V1G2	-0.136753
ATP6V1G3	0.169692
ATP6V1H	-0.625062
ATP7A	-0.0973756
ATP7B	0.0564234
ATP8A1	0.0574475
ATP8A2	-0.0847904
ATP8B1	0.121407
ATP8B2	-0.0177694
ATP8B3	-0.0278183
ATP8B4	0.219893
ATP9A	-0.0450833
ATP9B	-0.0564275
ATPAF1	-0.173411
ATPAF2	-0.271983
ATR	-0.8403
ATRAID	0.0842098
ATRIP	-0.734025
ATRN	0.00804109
ATRNL1	0.209246
ATRX	-0.148631
ATXN1	-0.0961909
ATXN10	-0.374978
ATXN1L	-0.0497485
ATXN2	-0.0428525
ATXN2L	-0.10396
ATXN3	-0.00266491
ATXN3L	0.262212
ATXN7	0.126307
ATXN7L1	0.0917497
ATXN7L2	-0.0834662
ATXN7L3	-0.457001
ATXN7L3B	-0.124578
AUH	-0.0712005
AUNIP	-0.0960731
AUP1	-0.0933679
AURKA	-1.12642
AURKAIP1	-0.595235
AURKB	-1.35288
AURKC	-0.0641103
AUTS2	-0.189993
AVEN	-0.19951
AVIL	-0.169975
AVL9	0.0625872
AVP	-0.121697
AVPI1	-0.113122
AVPR1A	-0.174665
AVPR1B	-0.152936
AVPR2	0.0794566
AWAT1	0.0311351
AWAT2	0.0761769
AXDND1	-0.131753
AXIN1	0.0431763
AXIN2	-0.0701825
AXL	-0.0766307
AZGP1	-0.133559
AZI2	0.10732
AZIN1	-0.219426
AZIN2	-0.163943
AZU1	0.0386554
B2M	-0.0055837
B3GALNT1	0.254875
B3GALNT2	0.157188
B3GALT1	-0.0915587
B3GALT2	0.0361104
B3GALT4	0.0349138
B3GALT5	0.215733
B3GALT6	-0.134795
B3GAT1	0.100457
B3GAT2	-0.166025
B3GAT3	-0.188262
B3GLCT	0.111103
B3GNT2	-0.197659
B3GNT3	-0.338745
B3GNT4	-0.30325
B3GNT5	-0.195851
B3GNT6	-0.189103
B3GNT7	0.0504661
B3GNT8	-0.0544167
B3GNT9	-0.158809
B3GNTL1	0.0816811
B4GALNT1	-0.10632
B4GALNT2	-0.161568
B4GALNT3	-0.154546
B4GALNT4	-0.0178327
B4GALT1	-0.0696715
B4GALT2	-0.0738386
B4GALT3	-0.416697
B4GALT4	0.0903433
B4GALT5	-0.118682
B4GALT6	-0.109035
B4GALT7	-0.199345
B4GAT1	-0.167211
B9D1	-0.0345258
B9D2	-0.0849271
BAALC	-0.00504125
BAAT	0.107467
BABAM1	0.134527
BABAM2	0.0322891
BACE1	-0.152966
BACE2	-0.042762
BACH1	0.159439
BACH2	0.08391
BAD	-0.143819
BAG1	0.0950428
BAG2	-0.241327
BAG3	-0.0995857
BAG4	-0.019851
BAG5	-0.00779528
BAG6	-0.268213
BAHD1	-0.121081
BAIAP2	-0.167818
BAIAP2L1	-0.00442782
BAIAP2L2	-0.10946
BAIAP3	-0.23264
BAK1	-0.392419
BAMBI	-0.116261
BANF1	-1.11584
BANF2	0.104427
BANK1	-0.0880749
BANP	-0.882826
BAP1	-0.503963
BARD1	-0.77433
BARHL1	-0.1698
BARHL2	-0.245281
BARX1	-0.0601954
BARX2	0.0222337
BASP1	0.224867
BATF	0.108243
BATF2	-0.348448
BATF3	0.188644
BAX	0.169192
BAZ1A	-0.0789606
BAZ1B	-0.325976
BAZ2A	-0.019298
BAZ2B	0.143759
BBC3	-0.00588005
BBIP1	0.142713
BBOF1	-0.0826607
BBOX1	0.126868
BBS1	-0.320237
BBS10	0.0937598
BBS12	0.0479222
BBS2	0.0558313
BBS4	0.0783924
BBS5	-0.0682757
BBS7	0.0630736
BBS9	-0.210403
BBX	0.0460773
BCAM	-0.0513902
BCAN	-0.38488
BCAP29	0.0613055
BCAP31	-0.329487
BCAR1	-0.751146
BCAR3	0.046704
BCAS1	0.150981
BCAS2	-0.747267
BCAS3	-0.247292
BCAS4	-0.0675775
BCAT1	0.140534
BCAT2	0.10305
BCCIP	-0.351283
BCDIN3D	-0.388554
BCHE	0.0452448
BCKDHA	0.0130291
BCKDHB	-0.15199
BCKDK	-0.0279388
BCL10	0.121436
BCL11A	-0.161097
BCL11B	0.0531139
BCL2	-0.0153604
BCL2A1	-0.106736
BCL2L1	-0.72381
BCL2L10	-0.0780823
BCL2L11	-0.00393803
BCL2L12	-0.166413
BCL2L13	-0.0260127
BCL2L14	-0.0737594
BCL2L15	-0.0011422
BCL2L2	-0.337072
BCL3	-0.00546881
BCL6	-0.112645
BCL6B	-0.0104465
BCL7A	-0.00820855
BCL7B	0.181755
BCL7C	0.0111688
BCL9	-0.0847075
BCL9L	-0.194058
BCLAF1	-0.808155
BCLAF3	0.0714851
BCO1	-0.199926
BCO2	0.00929519
BCOR	0.0598086
BCORL1	-0.0109908
BCR	0.00879528
BCS1L	-0.595017
BDH1	-0.0467875
BDH2	-0.289297
BDKRB1	0.149851
BDKRB2	-0.0239291
BDNF	-0.00412938
BDP1	-0.780144
BEAN1	-0.115486
BECN1	-0.292154
BEGAIN	-0.166601
BEND2	0.170767
BEND3	-0.365245
BEND4	-0.134301
BEND5	0.0349512
BEND6	0.00955813
BEND7	0.0280225
BEST1	0.0393803
BEST2	-0.0977439
BEST3	-0.15469
BEST4	-0.138886
BET1	-0.45951
BET1L	-0.135844
BEX1	0.050457
BEX2	-0.0345921
BEX3	0.00741018
BEX4	0.0420938
BEX5	0.00675989
BFAR	-0.0236283
BFSP1	0.0205339
BFSP2	0.110493
BGLAP	-0.118741
BGN	0.093076
BHLHA15	-0.356745
BHLHA9	0.0505254
BHLHB9	0.0583899
BHLHE22	-0.105455
BHLHE23	-0.0348184
BHLHE40	0.239855
BHLHE41	-0.150494
BHMT	-0.0263202
BHMT2	-0.0912639
BICC1	-0.00628307
BICD1	-0.171392
BICD2	-0.261433
BICDL1	-0.0657291
BICDL2	-0.248541
BICRA	0.0116664
BICRAL	-0.0264968
BID	0.0913428
BIK	0.0780746
BIN1	-0.187246
BIN2	-0.181262
BIN3	0.413189
BIRC2	-0.41657
BIRC3	0.110499
BIRC5	-1.52193
BIRC6	-0.613986
BIRC7	0.147097
BIRC8	-0.19865
BIVM	0.0940541
BLCAP	-0.064342
BLID	0.0972322
BLK	0.0152228
BLM	-0.18876
BLMH	-0.0515639
BLNK	-0.0171542
BLOC1S1	0.0397976
BLOC1S2	-0.172579
BLOC1S3	-0.302589
BLOC1S4	-0.0495954
BLOC1S5	0.0601968
BLOC1S6	-0.0985473
BLVRA	0.0846823
BLVRB	0.043516
BLZF1	-0.0478249
BMF	-0.240698
BMI1	0.203698
BMP1	-0.0160236
BMP10	-0.0343964
BMP15	0.0316476
BMP2	0.0506579
BMP2K	0.0354003
BMP3	0.14389
BMP4	0.0294147
BMP5	-0.0933921
BMP6	-0.0320594
BMP7	0.0662813
BMP8A	0.0688877
BMP8B	0.0107421
BMPER	0.0902723
BMPR1A	-0.148459
BMPR1B	0.132217
BMPR2	0.0300062
BMS1	-1.20666
BMT2	0.166118
BMX	0.0876647
BNC1	-0.0701631
BNC2	0.0903523
BNIP1	-0.436896
BNIP2	-0.222025
BNIP3	-0.232665
BNIP3L	0.213947
BNIPL	-0.242502
BOC	-0.13972
BOD1	-0.208679
BOD1L1	-0.175698
BOD1L2	0.211669
BOK	-0.0287535
BOLA1	-0.242771
BOLA3	-0.0352803
BOLL	0.0331331
BOP1	-1.31279
BORA	-0.96182
BORCS5	-0.348137
BORCS6	0.0834734
BORCS7	-0.271931
BORCS8	-0.349029
BPGM	0.124592
BPHL	-0.0332896
BPI	0.137484
BPIFA1	0.143826
BPIFA2	0.245831
BPIFA3	-0.0916018
BPIFB1	-0.0202673
BPIFB2	-0.0560609
BPIFB3	-0.167862
BPIFB4	-0.132318
BPIFB6	-0.0564044
BPIFC	0.0661918
BPNT1	-0.343221
BPTF	-0.489273
BRAF	-0.101503
BRAP	-0.237947
BRAT1	-0.488321
BRCA1	-0.621567
BRCA2	-0.752357
BRCC3	-0.0370391
BRD1	-0.362885
BRD2	-0.390364
BRD3	0.13213
BRD4	-1.09341
BRD7	-0.248269
BRD8	-0.450598
BRD9	0.00588879
BRDT	-0.0814838
BRF1	-0.946531
BRF2	-1.58448
BRI3	-0.181012
BRI3BP	0.0111859
BRICD5	0.0222297
BRINP1	0.209405
BRINP2	-0.137019
BRINP3	-0.0257305
BRIP1	-0.495806
BRIX1	-1.14091
BRK1	-0.505474
BRMS1	-0.448333
BRMS1L	-0.200894
BROX	0.155811
BRPF1	-0.283337
BRPF3	-0.045979
BRS3	0.15956
BRSK1	-0.0364852
BRSK2	-0.162033
BRWD1	-0.0917313
BRWD3	0.0580212
BSCL2	-0.264128
BSDC1	-0.0655024
BSG	-0.133126
BSN	-0.0200004
BSND	-0.185689
BSPH1	0.106681
BSPRY	-0.0700705
BST1	0.151019
BST2	0.0403795
BSX	0.0756056
BTAF1	-0.454309
BTBD1	-0.108198
BTBD10	-0.121002
BTBD11	-0.198722
BTBD16	0.0830453
BTBD17	-0.389592
BTBD18	0.0160672
BTBD2	0.0501056
BTBD3	-0.0275453
BTBD6	-0.0557171
BTBD7	-0.0297883
BTBD8	-0.00907694
BTBD9	-0.35944
BTC	0.0697239
BTD	-0.0206087
BTF3	-0.499227
BTF3L4	-0.535548
BTG1	-0.0884776
BTG2	-0.0730811
BTG3	0.0620851
BTG4	0.0604219
BTK	-0.0311293
BTLA	0.123867
BTN1A1	-0.0519501
BTN2A1	0.02284
BTN2A2	0.110385
BTN3A1	0.139535
BTN3A2	0.140307
BTN3A3	0.0703614
BTNL3	0.0378138
BTNL8	-0.0954872
BTNL9	0.121507
BTRC	-0.0607248
BUB1	-0.724704
BUB1B	-1.47286
BUB3	-2.08194
BUD13	-0.928569
BUD23	-1.44414
BUD31	-1.66346
BVES	-0.050179
BYSL	-1.30216
BZW1	0.0952192
BZW2	0.111311
C10orf105	-0.138641
C10orf113	0.266573
C10orf120	0.120161
C10orf53	-0.18303
C10orf55	-0.0452596
C10orf62	-0.0119054
C10orf67	0.161572
C10orf71	0.319283
C10orf82	0.150055
C10orf88	0.0143736
C10orf90	-0.0539462
C10orf99	0.0133435
C11orf1	0.0519137
C11orf16	0.123613
C11orf21	0.0278118
C11orf24	-0.0961313
C11orf40	-0.0681067
C11orf42	0.0246672
C11orf45	0.150535
C11orf49	-0.0286853
C11orf52	-0.000591275
C11orf53	0.0283929
C11orf54	0.12921
C11orf58	-0.119949
C11orf65	-0.216251
C11orf68	-0.339116
C11orf71	-0.177657
C11orf74	0.133345
C11orf80	-0.173021
C11orf86	-0.180835
C11orf87	0.105809
C11orf88	-0.138892
C11orf91	-0.105236
C11orf94	-0.149106
C12orf10	-0.396538
C12orf29	0.087962
C12orf4	0.0779071
C12orf40	0.287069
C12orf42	-0.00581026
C12orf43	-0.0617145
C12orf45	-0.661617
C12orf49	-0.338567
C12orf50	-0.0152354
C12orf54	0.123387
C12orf56	-0.392315
C12orf57	0.0761721
C12orf60	0.11095
C12orf65	-0.395555
C12orf66	0.0756209
C12orf71	0.0753437
C12orf73	-0.127746
C12orf74	-0.0293283
C12orf75	0.126235
C12orf76	-0.125522
C14orf119	-0.094429
C14orf177	0.136195
C14orf180	0.0846374
C14orf28	-0.0542558
C14orf39	0.102993
C14orf93	-0.0664212
C15orf39	-0.0844203
C15orf40	-0.199204
C15orf41	-0.277411
C15orf48	0.0822262
LINC02694	-0.0917769
C15orf61	0.230027
C15orf62	0.0446813
C15orf65	0.12344
BMERB1	0.0176796
C16orf46	-0.225998
C16orf54	-0.146497
C16orf58	0.160234
C16orf70	-0.198813
C16orf71	0.0763009
C16orf72	-0.640367
C16orf74	-0.118438
C16orf78	0.115195
C16orf86	-0.418943
C16orf87	-0.129821
C16orf89	-0.159541
C16orf90	-0.0118161
C16orf91	-0.177495
C16orf92	-0.282005
C16orf95	-0.178791
C16orf96	-0.140124
C17orf107	-0.0462118
C17orf49	-0.252747
C17orf50	-0.287724
LINC02693	-0.0172588
HROB	-0.33729
C17orf58	-0.363978
C17orf64	0.206766
C17orf67	0.0860622
C17orf75	-0.194211
C17orf78	0.125499
C17orf80	0.0274323
C17orf97	0.0947209
C17orf98	-0.161421
C17orf99	-0.0695049
C18orf21	-0.192329
C18orf25	0.104947
C18orf32	-0.282689
C18orf54	0.0111658
C18orf63	-0.00491923
C19orf12	0.127428
C19orf18	0.120806
FAM174C	-0.168621
C19orf25	-0.35309
C19orf33	0.0244452
C19orf38	-0.324093
C19orf44	-0.200299
C19orf47	-0.202284
C19orf53	-0.846425
C19orf54	0.109455
C19orf57	-0.13595
SHFL	-0.256979
C19orf67	-0.367063
MICOS13	-0.379232
C19orf71	0.0165763
C19orf73	-0.102412
C19orf81	-0.113168
C19orf84	0.0418917
C1D	-0.631882
C1GALT1	0.015678
C1GALT1C1	0.123344
C1QA	-0.0650543
C1QB	-0.076712
C1QBP	-0.685104
C1QC	-0.106282
C1QL1	0.00360171
C1QL2	0.112633
C1QL3	0.145419
C1QL4	0.0186955
C1QTNF1	-0.405159
C1QTNF12	0.0101232
C1QTNF2	0.0177045
C1QTNF3	0.0928893
C1QTNF4	-0.575504
C1QTNF5	-0.197365
C1QTNF6	-0.143734
C1QTNF7	0.0968499
C1QTNF8	0.00211591
C1QTNF9	-0.137724
C1QTNF9B	-0.233002
C1RL	0.139745
C1S	-0.0319431
C1orf100	-0.276779
C1orf105	-0.0967361
C1orf109	-2.01425
C1orf112	-0.029668
C1orf115	0.063113
C1orf116	0.00922167
C1orf122	0.0207912
CZIB	-0.245206
C1orf127	-0.274382
C1orf131	-0.354523
C1orf141	0.0569713
C1orf146	0.068961
C1orf158	0.0345746
C1orf159	-0.225579
C1orf162	-0.0802222
C1orf174	0.0750853
C1orf185	0.0610105
C1orf189	0.0297891
C1orf194	0.00298059
C1orf198	0.0635654
C1orf21	0.0468139
C1orf210	0.117948
C1orf216	-0.0211928
C1orf226	-0.125095
C1orf35	-0.0514248
C1orf43	-0.218577
C1orf50	-0.062611
C1orf52	-0.162277
C1orf53	0.0204006
C1orf54	-0.123976
C1orf56	-0.142744
C1orf61	-0.0181055
C1orf68	0.0303164
C1orf74	-0.358225
C1orf87	0.0305289
C1orf94	0.138066
C2	-0.0797895
C20orf141	0.0993557
C20orf144	-0.0243833
C20orf173	-0.0081461
C20orf194	-0.047058
C20orf202	-0.0811846
C20orf27	0.0808573
C20orf85	0.0415957
C20orf96	0.109395
CFAP410	-0.172744
C21orf58	-0.167505
C21orf62	0.0664185
C21orf91	0.0988479
C22orf15	-0.116081
C22orf23	-0.207169
C22orf31	0.0747715
C22orf39	-0.166983
C22orf42	0.255161
C22orf46	-0.228955
C2CD2	0.000332905
C2CD2L	0.10995
C2CD3	0.0436184
C2CD4A	0.0177411
C2CD4B	0.111114
C2CD4C	0.00063797
C2CD4D	-0.135151
C2CD5	0.125931
C2CD6	0.096591
C2orf15	-0.024638
C2orf16	0.0207149
ECRG4	0.129265
C2orf42	-0.0853351
C2orf49	-0.12682
C2orf50	-0.202634
MAB21L4	-0.112119
C2orf66	0.0755882
C2orf68	-0.312244
C2orf69	-0.207821
FAM166C	-0.0267601
C2orf72	0.248176
C2orf73	-0.048628
C2orf76	0.0230912
C2orf78	-0.171842
C2orf80	-0.009256
C2orf88	0.0970921
C2orf91	0.0666501
C3	0.0214449
C3AR1	-0.00352041
C3orf14	0.290848
C3orf18	-0.0871858
C3orf20	-0.134592
C3orf22	-0.0809554
TEX55	0.199566
C3orf33	0.208575
C3orf36	-0.0159665
C3orf38	-0.486123
C3orf52	0.106722
DIPK2A	0.272154
C3orf62	-0.0650252
C3orf67	0.198049
C3orf70	-0.0732649
C3orf80	0.107959
C3orf84	0.176416
C4BPA	0.145247
C4BPB	-0.022315
C4orf17	0.0126178
C4orf19	-0.28451
C4orf3	0.0191504
C4orf33	0.0767646
C4orf36	0.0233028
C4orf45	0.11306
C4orf46	-0.0545041
C4orf47	0.203925
C4orf48	-0.00341288
C4orf51	0.107274
C5	0.0256959
C5AR1	-0.0898813
C5AR2	0.104574
C5orf15	-0.204988
C5orf22	0.184338
C5orf24	0.0172668
C5orf30	-0.292997
C5orf34	-0.0954214
C5orf38	0.00103257
C5orf46	0.303996
C5orf47	-0.0223783
C5orf49	0.00146005
C5orf51	0.166868
C5orf52	0.0230865
C5orf63	-0.0129724
C6	0.0940316
TSBP1	-0.0122321
ILRUN	-0.130989
C6orf118	-0.0506074
C6orf120	0.0820066
C6orf132	-0.0636916
C6orf136	-0.165012
C6orf141	-0.125636
C6orf15	-0.407641
C6orf163	-0.0179423
C6orf201	0.0764237
MTRES1	-0.190892
BNIP5	-0.182186
C6orf223	0.211829
C6orf226	-0.110724
C6orf47	-0.226466
SNHG32	-0.128648
C6orf52	0.0490503
C6orf58	0.00549738
C6orf62	0.037692
C6orf89	-0.0982
C7	0.369934
C7orf25	0.174365
C7orf26	-0.478067
C7orf31	0.136467
C7orf33	0.0924103
MAP11	-0.0621435
C7orf50	-0.423179
C7orf57	0.0290135
C7orf61	-0.265256
C8A	0.129062
C8B	0.107905
C8G	-0.186795
C8orf33	-0.330387
C8orf34	0.0819137
C8orf37	-0.0823415
C8orf44	-0.0640737
C8orf48	0.212535
C8orf58	0.0764906
RBIS	-0.3547
C8orf74	0.0882168
C8orf76	-0.206258
C8orf82	-0.113048
C8orf86	0.152562
C8orf88	-0.158269
C9	-0.0410678
C9orf116	-0.223867
C9orf129	-0.342522
C9orf131	-0.0966959
C9orf135	0.0379131
C9orf152	0.0917835
C9orf153	0.0998924
C9orf16	-0.373668
C9orf24	-0.238736
AOPEP	0.145553
[truncated: 14,384 more rows]

## Sheet: 4c
Cancer associated genes (CAGs)
ABL1
ACVR1B
AFF1
AFF4
AGAP2
AGR2
AIM2
AKAP13
AKIP1
AKT1
AKT2
ALK
APC
ARAF
ARHGAP20
ARHGAP26
ARHGAP35
ARHGEF12
ARHGEF5
ARID1A
ARID1B
ARID2
ARID3B
ASPSCR1
ATRX
AURKA
AXL
B2M
BANP
BAP1
BAX
BCAS3
BCAS4
BCL10
BCL2
BCL3
BCL6
BCOR
BCR
BIN1
BMI1
BRAF
BRCA1
BRCC3
BRD7
BRI3BP
BRMS1
BTG1
CADM1
CADM4
CARD11
CARS
CASP8
CBFB
CBL
CCDC6
CCND1
CCNL1
CDC73
CDH1
CDK2AP1
CDKN1B
CDKN1C
CDKN2A
CDKN2C
CDKN2D
CEBPA
CHD5
CHEK2
CIC
CMC4
CREB3L2
CREBBP
CREBL2
CRK
CSF1R
CSNK2A3
CTCF
CTNNB1
CYLD
DAB2
DAB2IP
DAPK3
DCUN1D1
DDIT3
DDX6
DEK
DFNA5
DIS3L2
DLC1
DLEC1
DMTF1
DMTN
DNMT1
DNMT3A
DOCK4
DPH1
EFNA1
EGFR
ELAC2
ELF4
ELL
ENTPD5
EP300
EPB41L3
EPHB2
EPS15
ERBB2
ERG
ERRFI1
ETS1
ETS2
ETV1
ETV6
EVI2A
EVI2B
EWSR1
EXT1
EXT2
EZH2
FAM120A
FBXW7
FCGR2B
FER
FES
FGF3
FGF5
FGFR2
FGFR3
FGR
FH
FLCN
FLI1
FLT3
FOS
FOXL2
FOXO1
FOXO3
FOXO4
FRAT1
FRK
FSTL3
FUBP1
FUS
FYN
GAS7
GATA2
GATA3
GLI1
GMPS
GNA11
GNAQ
GNAS
GPR68
HCK
HIC1
HIF3A
HMGA2
HOPX
HOXA9
HPGD
HRAS
HTATIP2
IDH1
IDH2
ING1
ING4
IRF1
JAK1
JAK2
JAK3
JAZF1
JUN
KAT6A
KCTD11
KDM5C
KDM6A
KDSR
KIT
KLF4
KLK10
KMT2A
KRAS
LATS1
LATS2
LCK
LETMD1
LGR6
LHX4
LIMD1
LIN9
LITAF
LMO2
LYL1
LYN
LZTS1
MAF
MAFB
MAP2K1
MAP2K4
MAP3K1
MAP3K8
MAPKAPK5
MCF2
MCF2L
MCTS1
MDM2
MDM4
MECOM
MED12
MERTK
MET
MFHAS1
MKL1
MLH1
MLLT1
MLLT10
MLLT11
MLLT3
MLLT4
MN1
MPL
MSH2
MSH6
MTSS1
MTUS1
MUC1
MUTYH
MXI1
MYB
MYCN
MYD88
MYEOV
NBL1
NCKIPSD
NCOA1
NCOA3
NCOA4
NCOR1
NDRG2
NET1
NF1
NF2
NFE2L2
NFKB2
NKX2-1
NKX3-1
NOTCH1
NOTCH2
NPM1
NPRL2
NR4A3
NRAS
NSD1
NTRK1
NUP214
PAF1
PALB2
PARK7
PATZ1
PAX3
PAX5
PAX7
PBRM1
PBX1
PDCD4
PDGFB
PDGFD
PDGFRA
PDGFRB
PHB
PHF6
PHLDA3
PHLPP1
PHLPP2
PICALM
PIK3CA
PIK3R1
PIM2
PINX1
PLEKHG2
PLEKHO1
PLK2
PML
PMS1
POU2AF1
PPAPDC1B
PPP2R1A
PRCC
PRDM1
PRKCD
PRKCDBP
PRKCI
PRR5
PTCH1
PTEN
PTPN11
PTTG1
PYCARD
PYHIN1
RAB8A
RAF1
RAP1A
RARA
RARB
RASA1
RASL10A
RASSF1
RASSF2
RASSF4
RASSF5
RB1
RB1CC1
RBL1
RBL2
RBM15
RBMX
RECK
REL
RET
RHOA
RHOB
RNF213
RNF43
ROS1
RPS6KA2
RRAS2
RUNX1
RUNX1T1
SASH1
SEC31A
SET
SETBP1
SETD2
SF3B1
SH3GL1
SIRT4
SKP2
SMAD2
SMAD4
SMARCA4
SMARCB1
SMO
SOCS1
SOX9
SPECC1
SPI1
SPOP
SRC
SRSF2
SS18
ST20
STAG2
STARD13
STIL
STK11
STYK1
SUFU
SUSD2
SUZ12
TAF15
TAL1
TAL2
TBC1D3
TBRG1
TCF3
TCHP
TCL1A
TCP10L
TCTA
TET2
TFE3
TFG
TFPT
TLX1
TMEM127
TNFAIP3
TNFRSF17
TOP1
TP53
TP53INP1
TP63
TP73
TPM3
TPR
TRAF7
TRIM24
TRIM37
TSC1
TSC2
TSHR
U2AF1
UFL1
USP4
USP6
VAV1
VHL
VWA5A
WHSC1
WHSC1L1
WISP1
WNT1
WNT3
WT1
WWOX
WWTR1
XAF1
XRN1
YAP1
YES1
ZBTB16
ZBTB7C
ZDHHC17
ZFYVE19
ZNF521
ACVR1
ACVR2A
AJUBA
ALB
AMER1
APOB
AR
ARID5B
ASXL1
ASXL2
ATF7IP
ATM
ATR
ATXN3
AXIN1
AXIN2
BCL2L11
BRCA2
BTG2
CACNA1A
CBWD3
CD70
CD79B
CDK12
CDK4
CDKN1A
CHD3
CHD4
CHD8
CNBD1
COL5A1
CREB3L3
CSDE1
CTNND1
CUL1
CUL3
CYSLTR2
DACH1
DAZAP1
DDX3X
DHX9
DIAPH2
DICER1
DMD
EEF1A1
EEF2
EGR3
EIF1AX
ELF3
EPAS1
EPHA2
EPHA3
ERBB3
ERBB4
ERCC2
ESR1
FAM46D
FAT1
FGFR1
FLNA
FOXA1
FOXA2
FOXQ1
GABRA6
GNA13
GPS2
GRIN2D
GTF2I
H3F3A
H3F3C
HGF
HIST1H1C
HIST1H1E
HLA-A
HLA-B
HUWE1
IL6ST
IL7R
INPPL1
IRF2
IRF6
KANSL1
KEAP1
KEL
KIF1A
KLF5
KMT2B
KMT2C
KMT2D
KRT222
LEMD2
LZTR1
MACF1
MAP3K4
MAPK1
MAX
MEN1
MGA
MGMT
MSH3
MTOR
MUC6
MYC
MYH9
NIPBL
NUP133
NUP93
PCBP1
PDS5B
PGR
PIK3CB
PIK3CG
PIK3R2
PIM1
PLCB4
PLCG1
PLXNB2
PMS2
POLE
POLQ
POLRMT
PPM1D
PPP6C
PRKAR1A
PSIP1
PTMA
PTPDC1
PTPRC
PTPRD
RAC1
RAD21
RBM10
RFC1
RHEB
RIT1
RNF111
RPL22
RPL5
RPS6KA3
RQCD1
RXRA
SCAF4
SF1
SIN3A
SMARCA1
SMC1A
SMC3
SOS1
SOX17
SPTA1
SPTAN1
TAF1
TBL1XR1
TBX3
TCEB1
TCF12
TCF7L2
TGFBR2
TGIF1
THRAP3
TLR4
TMSB4X
TRAF3
TXNIP
UNCX
USP9X
XPO1
ZBTB20
ZBTB7B
ZC3H12A
ZCCHC12
ZFHX3
ZFP36L1
ZFP36L2
ZMYM2
ZMYM3
ZNF133
ZNF750
