# Supplementary material for: Integrative proteogenomic characterization of early esophageal cancer
Source: Research Square preprint supplement (doi:10.21203/rs.3.rs-227745/v2), 2021-10-12
Supplement: Supplementary file 10 [file 60d180c004005e0c9791e9e2.xlsx]

## Sheet: Description
Supplementary Table 7: Personalized trajectory of early ESCC, Related to Fig. 5 and Supplementary Fig. 6.
Sheet	Description
7a	The track samples.
7b	The value of slope index (K) of the equation.
7c	The value of coefficient index (R2) of the equation.

## Sheet: 7a
Symbol	Track
1(001)	T4
1(002)	T1
1(003)	T1
1(004)	T5
1(005)	T3
1(006)	T5
1(007)	T5
1(008)	T1
1(009)	T4
1(010)	T1
1(011)	T4
1(012)	T1
1(013)	T6
1(014)	T1
1(015)	T6
1(016)	T4
1(017)	T4
1(018)	T3
1(019)	T6
1(020)	T5
1(021)	T4
1(022)	T2
1(023)	T4
1(024)	T6
1(025)	T5
1(026)	T4
1(027)	T5
1(028)	T1
1(029)	T5
1(030)	T4
1(031)	T1
1(032)	T3
1(033)	T2
1(034)	T4
1(035)	T4
1(036)	T4
1(037)	T5
1(038)	T4
1(039)	T4
1(040)	T4
1(041)	T5
1(042)	T4
1(043)	T2
1(044)	T4
1(045)	T1
1(046)	T1
1(047)	T5
1(048)	T4
1(049)	T1
1(050)	T1
1(051)	T3
1(052)	T4
1(053)	T4
1(054)	T1
1(055)	T1
1(056)	T4
1(057)	T4
1(058)	T4
1(059)	T4
1(060)	T2
1(061)	T3
1(062)	T4
1(063)	T6
1(064)	T6
1(065)	T4
1(066)	T4
1(067)	T4
1(068)	T4
1(069)	T5
1(070)	T6
1(071)	T5
1(072)	T6
1(073)	T5
1(074)	T4
1(075)	T4
1(076)	T4
1(077)	T5
1(078)	T5
1(079)	T1
1(080)	T5
1(081)	T2
1(082)	T2
1(083)	T5
1(084)	T5
1(085)	T5
1(086)	T3
1(087)	T5
1(088)	T4
1(089)	T5
1(090)	T4
1(091)	T5
1(092)	T3
1(093)	T4
1(094)	T4
1(095)	T4
1(096)	T4
1(097)	T4
1(098)	T4
1(099)	T3
1(100)	T4
1(101)	T2
1(102)	T3
1(103)	T4
1(104)	T4
1(105)	T6
1(106)	T2
1(107)	T4
1(108)	T4
1(109)	T4
1(110)	T4
1(111)	T4
1(112)	T4
1(113)	T4
1(114)	T6
2_1(001)	T4
2_1(002)	T1
2_1(003)	T1
2_1(004)	T5
2_1(005)	T3
2_1(006)	T5
2_1(007)	T5
2_1(008)	T1
2_1(009)	T4
2_1(010)	T1
2_1(011)	T4
2_1(012)	T1
2_1(013)	T6
2_1(014)	T1
2_1(015)	T6
2_1(016)	T4
2_1(017)	T4
2_1(018)	T3
2_1(019)	T6
2_1(020)	T5
2_1(021)	T4
2_1(022)	T2
2_1(023)	T4
2_1(024)	T6
2_1(025)	T5
2_1(026)	T4
2_1(027)	T5
2_1(028)	T1
2_1(029)	T5
2_1(030)	T4
2_1(031)	T1
2_1(032)	T3
2_1(033)	T2
2_1(034)	T4
2_1(035)	T4
2_1(036)	T4
2_1(037)	T5
2_1(038)	T4
2_1(039)	T4
2_1(040)	T4
2_1(041)	T5
2_1(042)	T4
2_1(043)	T2
2_1(044)	T4
2_1(045)	T1
2_1(046)	T1
2_1(047)	T5
2_1(048)	T4
2_1(049)	T1
2_1(050)	T1
2_1(051)	T3
2_1(052)	T4
2_1(053)	T4
2_1(054)	T1
2_1(055)	T1
2_1(056)	T4
2_1(057)	T4
2_1(058)	T4
2_1(059)	T4
2_1(060)	T2
2_1(061)	T3
2_1(062)	T4
2_1(063)	T6
2_1(064)	T6
2_1(065)	T4
2_1(066)	T4
2_1(067)	T4
2_1(068)	T4
2_1(069)	T5
2_1(070)	T6
2_1(071)	T5
2_1(072)	T6
2_1(073)	T5
2_1(074)	T4
2_1(075)	T4
2_1(076)	T4
2_1(077)	T5
2_1(078)	T5
2_1(079)	T1
2_1(080)	T5
2_1(081)	T2
2_1(082)	T2
2_1(083)	T5
2_1(084)	T5
2_1(085)	T5
2_1(086)	T3
2_1(087)	T5
2_1(088)	T4
2_1(089)	T5
2_1(090)	T4
2_1(091)	T5
2_1(092)	T3
2_1(093)	T4
2_1(094)	T4
2_1(095)	T4
2_1(096)	T4
2_1(097)	T4
2_1(098)	T4
2_1(099)	T3
2_1(100)	T4
2_1(101)	T2
2_1(102)	T3
2_1(103)	T4
2_1(104)	T4
2_1(105)	T6
2_1(106)	T2
2_1(107)	T4
2_1(108)	T4
2_1(109)	T4
2_1(110)	T4
2_1(111)	T4
2_1(112)	T4
2_1(113)	T4
2_1(114)	T6
2_2(003)	T1
2_2(004)	T5
2_2(005)	T3
2_2(007)	T5
2_2(010)	T1
2_2(012)	T1
2_2(013)	T6
2_2(014)	T1
2_2(015)	T6
2_2(017)	T4
2_2(018)	T3
2_2(019)	T6
2_2(020)	T5
2_2(021)	T4
2_2(022)	T2
2_2(023)	T4
2_2(024)	T6
2_2(025)	T5
2_2(026)	T4
2_2(027)	T5
2_2(028)	T1
2_2(029)	T5
2_2(030)	T4
2_2(032)	T3
2_2(033)	T2
2_2(035)	T4
2_2(036)	T4
2_2(037)	T5
2_2(038)	T4
2_2(039)	T4
2_2(040)	T4
2_2(041)	T5
2_2(042)	T4
2_2(044)	T4
2_2(045)	T1
2_2(046)	T1
2_2(047)	T5
2_2(048)	T4
2_2(049)	T1
2_2(051)	T3
2_2(052)	T4
2_2(053)	T4
2_2(054)	T1
2_2(055)	T1
2_2(056)	T4
2_2(057)	T4
2_2(058)	T4
2_2(059)	T4
2_2(061)	T3
2_2(062)	T4
2_2(063)	T6
2_2(064)	T6
2_2(065)	T4
2_2(066)	T4
2_2(067)	T4
2_2(068)	T4
2_2(069)	T5
2_2(071)	T5
2_2(072)	T6
2_2(074)	T4
2_2(075)	T4
2_2(077)	T5
2_2(078)	T5
2_2(080)	T5
2_2(081)	T2
2_2(082)	T2
2_2(083)	T5
2_2(084)	T5
2_2(085)	T5
2_2(086)	T3
2_2(087)	T5
2_2(088)	T4
2_2(089)	T5
2_2(091)	T5
2_2(092)	T3
2_2(093)	T4
2_2(095)	T4
2_2(096)	T4
2_2(098)	T4
2_2(099)	T3
2_2(100)	T4
2_2(101)	T2
2_2(102)	T3
2_2(103)	T4
2_2(104)	T4
2_2(105)	T6
2_2(106)	T2
2_2(107)	T4
2_2(108)	T4
2_2(110)	T4
2_2(112)	T4
2_2(113)	T4
3_1(001)	T4
3_1(004)	T5
3_1(005)	T3
3_1(006)	T5
3_1(007)	T5
3_1(008)	T1
3_1(012)	T1
3_1(015)	T6
3_1(016)	T4
3_1(017)	T4
3_1(018)	T3
3_1(019)	T6
3_1(020)	T5
3_1(021)	T4
3_1(022)	T2
3_1(023)	T4
3_1(025)	T5
3_1(026)	T4
3_1(027)	T5
3_1(028)	T1
3_1(029)	T5
3_1(030)	T4
3_1(032)	T3
3_1(033)	T2
3_1(034)	T4
3_1(035)	T4
3_1(037)	T5
3_1(038)	T4
3_1(039)	T4
3_1(041)	T5
3_1(044)	T4
3_1(046)	T1
3_1(047)	T5
3_1(048)	T4
3_1(049)	T1
3_1(051)	T3
3_1(053)	T4
3_1(056)	T4
3_1(059)	T4
3_1(067)	T4
3_1(068)	T4
3_1(075)	T4
3_1(076)	T4
3_1(078)	T5
3_1(082)	T2
3_1(083)	T5
3_1(085)	T5
3_1(086)	T3
3_1(088)	T4
3_1(093)	T4
3_1(095)	T4
3_1(097)	T4
3_1(098)	T4
3_1(099)	T3
3_1(100)	T4
3_1(102)	T3
3_1(104)	T4
3_1(105)	T6
3_1(107)	T4
3_1(109)	T4
3_1(112)	T4
3_2(003)	T1
3_2(004)	T5
3_2(008)	T1
3_2(010)	T1
3_2(011)	T4
3_2(012)	T1
3_2(015)	T6
3_2(018)	T3
3_2(020)	T5
3_2(021)	T4
3_2(024)	T6
3_2(026)	T4
3_2(028)	T1
3_2(029)	T5
3_2(032)	T3
3_2(034)	T4
3_2(036)	T4
3_2(037)	T5
3_2(038)	T4
3_2(039)	T4
3_2(040)	T4
3_2(041)	T5
3_2(047)	T5
3_2(048)	T4
3_2(049)	T1
3_2(050)	T1
3_2(051)	T3
3_2(052)	T4
3_2(056)	T4
3_2(057)	T4
3_2(059)	T4
3_2(060)	T2
3_2(062)	T4
3_2(063)	T6
3_2(064)	T6
3_2(065)	T4
3_2(067)	T4
3_2(068)	T4
3_2(069)	T5
3_2(070)	T6
3_2(071)	T5
3_2(073)	T5
3_2(074)	T4
3_2(075)	T4
3_2(076)	T4
3_2(078)	T5
3_2(080)	T5
3_2(081)	T2
3_2(082)	T2
3_2(085)	T5
3_2(086)	T3
3_2(087)	T5
3_2(089)	T5
3_2(092)	T3
3_2(093)	T4
3_2(094)	T4
3_2(095)	T4
3_2(096)	T4
3_2(097)	T4
3_2(098)	T4
3_2(099)	T3
3_2(100)	T4
3_2(101)	T2
3_2(102)	T3
3_2(103)	T4
3_2(104)	T4
3_2(105)	T6
3_2(107)	T4
3_2(109)	T4
3_2(110)	T4
3_2(112)	T4
3_2(113)	T4
3_2(114)	T6
3_3(001)	T4
3_3(004)	T5
3_3(006)	T5
3_3(007)	T5
3_3(008)	T1
3_3(012)	T1
3_3(013)	T6
3_3(015)	T6
3_3(017)	T4
3_3(018)	T3
3_3(019)	T6
3_3(020)	T5
3_3(022)	T2
3_3(025)	T5
3_3(026)	T4
3_3(027)	T5
3_3(028)	T1
3_3(032)	T3
3_3(034)	T4
3_3(035)	T4
3_3(038)	T4
3_3(039)	T4
3_3(040)	T4
3_3(041)	T5
3_3(045)	T1
3_3(047)	T5
3_3(048)	T4
3_3(049)	T1
3_3(050)	T1
3_3(051)	T3
3_3(054)	T1
3_3(057)	T4
3_3(059)	T4
3_3(060)	T2
3_3(061)	T3
3_3(062)	T4
3_3(067)	T4
3_3(069)	T5
3_3(070)	T6
3_3(071)	T5
3_3(072)	T6
3_3(077)	T5
3_3(078)	T5
3_3(080)	T5
3_3(083)	T5
3_3(085)	T5
3_3(086)	T3
3_3(088)	T4
3_3(090)	T4
3_3(091)	T5
3_3(092)	T3
3_3(093)	T4
3_3(095)	T4
3_3(096)	T4
3_3(098)	T4
3_3(099)	T3
3_3(100)	T4
3_3(101)	T2
3_3(102)	T3
3_3(103)	T4
3_3(105)	T6
3_3(106)	T2
3_3(107)	T4
3_3(109)	T4
3_3(110)	T4
3_3(112)	T4
3_3(113)	T4
3_4(007)	T5
3_4(012)	T1
3_4(013)	T6
3_4(017)	T4
3_4(018)	T3
3_4(020)	T5
3_4(023)	T4
3_4(024)	T6
3_4(029)	T5
3_4(030)	T4
3_4(053)	T4
3_4(069)	T5
3_4(075)	T4
3_4(078)	T5
3_4(081)	T2
3_4(088)	T4
3_4(105)	T6
3_4(107)	T4
3_4(110)	T4
3_5(001)	T4
3_5(002)	T1
3_5(003)	T1
3_5(004)	T5
3_5(006)	T5
3_5(007)	T5
3_5(009)	T4
3_5(012)	T1
3_5(013)	T6
3_5(015)	T6
3_5(017)	T4
3_5(018)	T3
3_5(020)	T5
3_5(024)	T6
3_5(032)	T3
3_5(034)	T4
3_5(040)	T4
3_5(042)	T4
3_5(051)	T3
3_5(053)	T4
3_5(055)	T1
3_5(060)	T2
3_5(063)	T6
3_5(064)	T6
3_5(066)	T4
3_5(067)	T4
3_5(069)	T5
3_5(070)	T6
3_5(075)	T4
3_5(079)	T1
3_5(081)	T2
3_5(087)	T5
3_5(088)	T4
3_5(091)	T5
3_5(093)	T4
3_5(098)	T4
3_5(104)	T4
3_5(105)	T6
3_5(106)	T2
4_1(002)	T1
4_1(003)	T1
4_1(004)	T5
4_1(005)	T3
4_1(006)	T5
4_1(009)	T4
4_1(010)	T1
4_1(011)	T4
4_1(013)	T6
4_1(015)	T6
4_1(016)	T4
4_1(018)	T3
4_1(024)	T6
4_1(025)	T5
4_1(026)	T4
4_1(027)	T5
4_1(028)	T1
4_1(031)	T1
4_1(032)	T3
4_1(037)	T5
4_1(040)	T4
4_1(042)	T4
4_1(050)	T1
4_1(055)	T1
4_1(061)	T3
4_1(062)	T4
4_1(063)	T6
4_1(065)	T4
4_1(066)	T4
4_1(067)	T4
4_1(068)	T4
4_1(069)	T5
4_1(071)	T5
4_1(073)	T5
4_1(074)	T4
4_1(076)	T4
4_1(077)	T5
4_1(080)	T5
4_1(081)	T2
4_1(082)	T2
4_1(083)	T5
4_1(084)	T5
4_1(086)	T3
4_1(087)	T5
4_1(088)	T4
4_1(091)	T5
4_1(093)	T4
4_1(094)	T4
4_1(095)	T4
4_1(098)	T4
4_1(099)	T3
4_1(100)	T4
4_1(101)	T2
4_1(102)	T3
4_1(104)	T4
4_1(106)	T2
4_1(107)	T4
4_1(109)	T4
4_1(110)	T4
4_1(112)	T4
4_1(113)	T4
4_2(006)	T5
4_2(010)	T1
4_2(013)	T6
4_2(018)	T3
4_2(019)	T6
4_2(020)	T5
4_2(022)	T2
4_2(024)	T6
4_2(029)	T5
4_2(038)	T4
4_2(039)	T4
4_2(041)	T5
4_2(061)	T3
4_2(070)	T6
4_2(092)	T3
4_2(103)	T4
4_2(107)	T4
4_2(111)	T4
4_3(013)	T6
4_3(017)	T4
4_3(030)	T4
4_3(041)	T5
4_3(054)	T1
4_3(070)	T6
4_3(112)	T4
5_1(005)	T3
5_1(006)	T5
5_1(027)	T5
5_1(031)	T1
5_1(061)	T3
5_1(069)	T5
5_1(076)	T4
5_1(077)	T5
5_1(097)	T4
5_1(105)	T6
5_1(106)	T2
5_1(107)	T4
5_1(110)	T4
5_1(112)	T4
5_2(010)	T1
5_2(013)	T6
5_2(031)	T1
5_2(043)	T2
5_2(061)	T3
5_2(062)	T4
5_2(084)	T5
5_2(099)	T3
5_2(114)	T6
5_3(013)	T6
5_3(020)	T5
5_3(024)	T6
5_3(042)	T4
5_3(070)	T6
5_3(090)	T4
5_3(099)	T3
5_3(111)	T4
5_3(112)	T4
6_1(006)	T5
6_1(020)	T5
6_1(028)	T1
6_1(033)	T2
6_1(106)	T2
6_2(006)	T5
6_2(013)	T6
6_2(020)	T5
6_2(106)	T2
6_2(114)	T6
6_3(010)	T1
6_3(013)	T6
6_3(041)	T5
6_3(043)	T2
6_3(070)	T6
6_3(099)	T3
6_3(109)	T4
7_1(006)	T5
7_1(013)	T6
7_1(015)	T6
7_1(020)	T5
7_1(042)	T4
7_1(058)	T4
7_1(063)	T6
7_1(069)	T5
7_1(099)	T3
7_1(104)	T4
7_1(106)	T2
7_1(107)	T4
7_2(013)	T6
7_2(015)	T6
7_2(020)	T5
7_2(023)	T4
7_2(043)	T2
7_2(099)	T3
7_2(100)	T4
7_2(105)	T6
7_2(108)	T4
7_3(013)	T6
7_3(020)	T5
7_3(041)	T5
7_3(043)	T2
7_3(070)	T6
7_3(099)	T3
7_3(101)	T2
7_3(103)	T4
7_3(105)	T6
7_3(106)	T2
7_3(109)	T4

## Sheet: 7b
Symbol	Track 1	Track 2	Track 3	Track 4	Track 5	Track 6
2020-03-01	1.05343e-21	3.1773e-22	1.34757e-21	0.00188842	0.000160673	-1.46597e-21
2020-09-01	0.00584124	0.00826479	0.00653503	0.0253539	0.0498829	0.0359907
2020-09-10	0.0260228	0.0351305	0.101051	0.0480225	-0.00829947	-0.00665514
2020-09-11	0.0871365	0.0476943	0.0793061	0.102577	0.103604	0.0940972
2020-09-15	0.00193724	0.0168376	0.0311363	0.0328232	0.019942	0.0190458
2020-03-02	0.00352578	-0.000106422	-0.000821853	0.00206862	0.000399162	1.83604e-05
2020-09-02	0.914013	0.219663	0.221916	0.481314	0.565373	0.07046
2020-09-04	0.000484983	3.1773e-22	-0.000138105	-8.02757e-05	5.36089e-05	-7.66196e-05
2020-03-05	0.00139098	-0.00215163	-0.000229684	-0.000158907	-0.00209979	1.00931e-05
2020-09-05	0.00018351	-0.00136918	-0.000306755	-0.00261868	-0.00222993	-0.00157166
2020-09-06	0.0524488	0.0618088	0.140831	0.123373	0.168452	0.168149
2020-09-07	0.151871	0.0683762	0.112195	0.132659	0.136177	0.100927
2020-09-08	-0.0048482	0.0128793	0.0102727	0.0395103	0.0151522	0.0470483
2020-09-09	0.252584	0.046554	0.119018	0.162106	0.267482	0.104668
A1BG	-0.0469639	0.00092525	0.00123927	0.0860916	0.138701	0.11987
A2M	0.169549	0.101327	0.0708636	0.326321	0.196406	-0.0548556
A2ML1	-3.64934	-1.21525	-1.85731	-2.76065	-2.28891	-1.50919
A4GALT	1.05343e-21	3.1773e-22	-0.00186141	4.03135e-21	-9.50591e-05	-1.46597e-21
AAAS	0.0124203	0.00267918	0.022629	0.0121972	0.0063389	0.00329062
AACS	-0.00920849	-0.0092378	-0.00671563	-0.00530388	-0.00438223	-0.00660822
AADAC	1.05343e-21	3.1773e-22	0.00757281	-0.00029963	0.00131568	8.80366e-05
AADACL2	1.05343e-21	3.1773e-22	1.34757e-21	4.03135e-21	0.00197025	-1.46597e-21
AAED1	1.05343e-21	-0.00133998	0.00069631	0.000184214	0.0017236	-1.46597e-21
AAGAB	0.0104788	-0.000334525	0.0097083	0.0111579	0.00717793	0.000658938
AAK1	0.00417987	0.00099444	0.00370694	0.00768371	0.00405209	0.00781505
AAMDC	0.00795621	3.1773e-22	1.34757e-21	0.00243254	-0.000594262	-1.46597e-21
AAMP	1.05343e-21	7.4251e-06	6.05606e-05	-3.32557e-06	8.4277e-05	0.000159834
AAR2	1.05343e-21	3.1773e-22	0.000205756	0.000298759	4.53358e-05	-1.46597e-21
AARS	0.111815	0.112651	0.116162	0.0866228	0.0783821	0.0706677
AARS2	0.0141023	-0.00479347	0.00233424	0.011184	0.0120555	0.00971069
AASDHPPT	0.0175907	-0.0026151	0.0136551	0.00979992	0.0134999	0.0062027
AASS	0.00770495	-0.00573054	0.00252704	0.0153905	0.0120277	0.000466423
AATF	0.00136741	0.00261436	0.00277738	0.00523847	0.005321	0.000422545
ABAT	-0.00475356	0.00621311	-0.0021217	0.0108651	0.0157027	-0.00049244
ABCA1	1.05343e-21	3.1773e-22	1.34757e-21	0.000137455	-2.27911e-21	-1.46597e-21
ABCA12	-5.74447e-06	0.000997566	-5.31609e-05	0.000173408	-1.61281e-05	-6.38544e-05
ABCA13	5.74935e-05	-0.000119911	0.000145964	1.62395e-05	0.000104589	-1.06356e-05
ABCA2	2.2292e-05	3.1773e-22	1.34757e-21	4.03135e-21	-2.27911e-21	-1.46597e-21
ABCA3	-2.98021e-05	-8.70458e-05	-0.00128157	-0.000349933	-3.30486e-05	0.000706225
ABCA4	0.000617408	3.1773e-22	1.34757e-21	4.03135e-21	-4.87898e-05	-1.46597e-21
ABCA6	0.000687494	3.1773e-22	1.34757e-21	4.03135e-21	-2.27911e-21	-1.46597e-21
ABCA8	1.05343e-21	3.1773e-22	-1.10444e-05	2.64913e-05	9.9624e-05	-1.46597e-21
ABCB1	-3.54377e-05	3.53496e-05	6.80032e-05	3.37001e-05	6.18892e-06	1.25012e-05
ABCB10	0.000371013	-0.000284174	0.00312711	0.00140797	0.000257952	0.000702615
ABCB11	0.00107509	-3.24366e-05	0.000180533	0.000206163	-6.05988e-06	-3.4619e-05
ABCB4	1.05343e-21	3.1773e-22	1.34757e-21	4.03135e-21	1.62284e-06	-1.46597e-21
ABCB6	0.0243454	-0.00270008	0.0427642	0.00708124	0.00202335	0.000435017
ABCB7	0.00176885	1.928e-05	0.00349388	0.00305719	0.00299317	0.00120262
ABCB8	0.00421333	0.000241462	0.000123922	-0.000253485	-0.00139952	0.000171625
ABCB9	1.05343e-21	3.1773e-22	1.34757e-21	7.19274e-05	0.000227846	-1.46597e-21
ABCC1	0.0393087	-0.00249779	0.134076	0.0366514	0.047641	0.0103673
ABCC10	1.05343e-21	3.1773e-22	1.34757e-21	4.03135e-21	-2.56372e-05	-1.46597e-21
ABCC2	1.05343e-21	3.1773e-22	1.34757e-21	3.03595e-05	-0.000447037	-1.46597e-21
ABCC3	1.05343e-21	7.30237e-06	0.000340257	-7.61596e-06	-6.02152e-05	2.66527e-05
ABCC4	1.05343e-21	3.1773e-22	0.000106823	-1.84754e-06	-2.27911e-21	-1.3104e-05
ABCC5	-0.000529148	-0.00144518	1.34757e-21	0.000140129	-8.56976e-06	7.83939e-05
ABCC6	1.05343e-21	3.1773e-22	1.34757e-21	4.03135e-21	-2.8805e-05	-1.46597e-21
ABCD1	1.05343e-21	4.07046e-05	0.000674021	0.000700812	0.000203257	5.49267e-05
ABCD3	-0.0095179	-0.00932477	-0.00570601	-0.00675235	-0.00673574	-0.00366154
ABCD4	1.05343e-21	3.1773e-22	-0.00273047	0.000773403	-9.9596e-06	-1.46597e-21
ABCE1	0.0716795	0.00109584	0.0327548	0.0422822	0.0542493	0.033407
ABCF1	0.0548687	0.0291572	0.0473407	0.0482568	0.0811901	0.0260683
ABCF2	0.00642392	0.0138484	0.0158682	0.0181729	0.0127819	0.01288
ABCF3	0.0276607	-0.0862188	-0.0399782	-0.0709788	-0.131153	-0.020134
ABCG2	1.05343e-21	3.1773e-22	1.34757e-21	4.24501e-05	5.82421e-05	-1.46597e-21
ABCG5	1.05343e-21	3.1773e-22	1.34757e-21	-8.2515e-05	-2.27911e-21	-1.46597e-21
ABCG8	-0.000114485	3.1773e-22	1.34757e-21	4.03135e-21	-2.27911e-21	-1.46597e-21
ABHD10	0.208179	0.0692836	0.203454	0.168906	0.215916	0.108922
ABHD11	0.0265609	0.0515068	0.100978	0.0610317	0.115973	0.0570289
ABHD12	0.0313051	0.00072859	0.00293309	0.0102464	0.0090378	0.0066819
ABHD14B	0.0952434	-0.0371173	-0.000913763	0.132712	0.084633	0.0454415
ABHD16A	4.11251e-05	0.00112961	0.00762324	0.00306949	-0.000309551	0.00173478
ABHD17B	1.05343e-21	3.1773e-22	1.34757e-21	8.83966e-05	0.000167456	0.000110088
ABHD17C	-0.00145406	-0.000232767	-0.000110496	-0.000453073	-0.000280563	-0.000215322
ABHD3	0.000266431	0.000793704	1.39728e-05	4.03135e-21	-1.47141e-05	0.000344081
ABHD4	-0.000166406	3.1773e-22	0.00503093	-4.58333e-05	-7.2132e-05	8.16531e-05
ABHD5	-0.000442477	-2.38037e-05	1.34757e-21	-0.000242949	-1.24831e-05	-3.29233e-05
ABHD6	0.00175713	-0.000290363	0.00111379	0.0022192	0.0025941	0.000746694
ABI1	7.30642e-05	-0.0272455	0.01865	0.00141059	0.0101404	-0.000736368
ABI2	0.000890296	0.000551441	0.000230663	0.0015507	-2.27911e-21	-1.46597e-21
ABI3	0.00329608	0.00105326	0.00220591	0.00165661	0.00024833	0.000391571
ABI3BP	0.000437581	0.00144161	0.00279866	0.00134533	0.00185356	0.00451158
ABL1	1.05343e-21	3.1773e-22	1.34757e-21	-1.8431e-06	-2.27911e-21	0.000106372
ABLIM1	-0.0484473	-0.0326892	-0.0383081	-0.0495607	-0.0614302	-0.0230403
ABLIM2	0.000806461	-0.000153448	-0.00391847	-0.0025005	-0.00216585	-1.46597e-21
ABLIM3	-0.00232557	-0.000706097	-0.00289292	-0.00258551	-0.00190993	-0.00101479
ABO	1.05343e-21	3.1773e-22	1.34757e-21	-0.000674809	-2.27911e-21	-1.46597e-21
ABR	0.00878293	-0.00572662	0.0134742	0.00572419	0.047844	0.000273684
ABRACL	1.05343e-21	3.1773e-22	1.34757e-21	4.03135e-21	0.000461901	-1.46597e-21
ABT1	0.00131953	2.78799e-05	0.00209793	0.00153962	0.0017901	0.00026555
ABTB2	-0.000726891	3.1773e-22	-5.44374e-05	-1.32407e-05	-6.53682e-05	-1.46597e-21
ACAA1	-0.0124259	-0.0234183	-0.0111992	-0.0167013	0.0180136	-0.00629759
ACAA2	0.210956	0.0635807	0.0574934	0.0869421	0.110017	0.0856074
ACACA	-0.00168033	-0.00658799	-0.00889818	-0.000459336	0.00262494	-0.0020321
ACACB	1.05343e-21	3.1773e-22	1.34757e-21	4.03135e-21	-2.27911e-21	-0.000129299
ACAD10	0.00131461	-0.000112444	0.000174014	0.000483788	-2.71252e-05	0.000242546
ACAD11	1.05343e-21	3.1773e-22	1.34757e-21	-6.74101e-07	-2.27911e-21	-1.46597e-21
ACAD8	-0.00109758	0.0110562	0.0211383	0.014739	0.0124655	0.0159343
ACAD9	0.0304343	0.0046734	0.0259936	0.0262623	0.0281485	0.00729707
ACADL	0.000262094	0.000236721	0.000371696	0.000215659	0.00149767	0.000192493
ACADM	0.0677569	0.0417048	0.0572104	0.0735379	0.0471238	0.0692618
ACADS	0.0108198	-0.00273338	0.012305	0.0142028	0.00238685	0.0109605
ACADSB	0.00312128	0.00183901	0.00264729	0.00721533	0.0074309	0.00322608
ACADVL	-0.173641	-0.0999788	-0.0501293	-0.0998993	-0.0390846	0.0749531
ACAP1	0.00115492	0.00079903	0.00313928	0.0103277	0.00484124	0.00828969
ACAP2	0.0168854	0.00536153	0.0144991	0.0158163	0.0124225	-0.00108682
ACAP3	1.05343e-21	3.1773e-22	1.34757e-21	-0.000206946	-2.27911e-21	-0.000122066
ACAT1	0.366371	0.0748708	0.170633	0.151201	0.213459	0.117525
ACAT2	0.000621291	-0.0309822	-0.0290253	0.00347784	-0.0345316	-0.0117354
ACBD3	0.0547161	-0.0100171	0.0431843	0.022618	0.0129331	0.0126143
ACBD5	-0.000465195	0.000108186	0.00395625	0.00189137	0.00112455	0.00479332
ACBD6	0.000154671	-0.000139266	0.00154007	0.000922143	0.000383396	0.000298745
ACCS	1.05343e-21	3.1773e-22	1.34757e-21	4.03135e-21	0.000160356	0.000888948
ACCSL	1.05343e-21	3.1773e-22	1.34757e-21	-0.000124622	-2.27911e-21	-1.46597e-21
ACD	1.05343e-21	3.1773e-22	1.34757e-21	4.03135e-21	-1.44985e-05	-1.46597e-21
ACE	0.00163032	-3.74895e-05	0.00127438	0.00176395	0.000656099	0.00280485
ACER1	1.05343e-21	3.1773e-22	-0.00245247	-0.000858739	-0.000285386	-1.46597e-21
ACIN1	0.0827555	0.0428753	0.0405955	0.0616607	0.0707293	0.0331886
ACLY	0.0817547	-0.0131187	0.0518993	0.184424	0.315555	-0.210921
ACN9	1.05343e-21	3.1773e-22	1.34757e-21	0.00032429	-2.04273e-05	0.0144106
ACO1	0.054704	0.016281	0.0452614	0.040968	0.0411562	0.0267681
ACO2	0.855727	-0.0140013	0.415128	0.452123	0.273078	0.221138
ACOT1	0.00185257	3.1773e-22	1.34757e-21	4.48901e-06	-2.27911e-21	-1.46597e-21
ACOT11	-0.000582521	-0.000972278	-7.96192e-05	-0.000837035	-0.000679389	-0.0007491
ACOT12	1.05343e-21	3.1773e-22	1.34757e-21	-1.61868e-05	-2.27911e-21	-1.46597e-21
ACOT13	0.0310215	0.00907302	0.163007	0.045888	0.0804382	0.058812
ACOT7	0.0744599	0.0981271	0.0435631	0.0991912	0.0598001	0.0646788
ACOT8	0.00618846	-0.0012028	0.0412658	0.00573096	0.0031942	0.000329957
ACOT9	0.0330207	0.036093	0.0493686	0.0398354	0.0245398	0.0221949
ACOX1	-0.054204	-0.0420935	-0.0368726	-0.0472123	-0.0252392	-0.0196933
ACOX2	0.408738	-0.0858828	1.23011	0.121673	-0.0103735	0.736831
ACOX3	-0.0140029	-0.0171378	-0.0201413	-0.0204966	-0.0220567	-0.0163351
ACP1	0.210793	0.0857102	0.305583	0.214117	0.191434	0.266314
ACP2	0.000391956	0.00089772	0.00688055	0.00810872	0.00448329	0.00429923
ACP5	0.0144813	0.00538951	0.0157089	0.0125758	0.0119398	0.0187668
ACPL2	-0.000132383	-0.000549661	-0.00035283	-0.000164408	-0.000142343	-0.000152736
ACPP	-0.0951373	-0.0476938	-0.0477234	-0.0742093	-0.064757	-0.0414351
ACSF2	0.000485489	-0.00290933	-0.0018403	0.00228909	0.00305731	0.00156977
ACSF3	0.0131233	0.00405186	0.00398817	0.00476756	0.00286599	0.00169854
ACSL1	0.00420858	-0.000777694	0.0122011	0.0137376	0.0240208	0.00387999
ACSL3	0.00705823	-0.00790333	0.0035389	0.00696835	-0.00584577	0.00174681
ACSL4	0.00477712	0.00559262	0.0150053	0.0244573	0.0142851	0.0112227
ACSL5	1.05343e-21	-0.000155684	0.00167622	0.00189947	0.00135341	0.00275048
ACSL6	0.000192685	3.1773e-22	-7.94037e-05	0.000196165	0.000653694	9.67183e-05
ACSM3	9.47832e-05	-0.000149211	-0.000314389	4.0116e-05	-0.000151836	-0.000146232
ACSM5	1.05343e-21	3.1773e-22	1.34757e-21	1.92754e-05	-2.27911e-21	-1.46597e-21
ACSS1	0.0270737	0.00691983	0.0161275	0.0753404	0.0101445	0.0254719
ACSS2	0.00227865	0.00715289	0.000616682	0.00126057	0.00556189	0.00292313
ACSS3	1.05343e-21	3.1773e-22	1.96876e-06	0.000115945	-2.27911e-21	-1.46597e-21
ACTA1	2.77377	11.8838	-5.88786	-2.20742	7.57995	10.8786
ACTA2	1.05343e-21	3.1773e-22	1.34757e-21	4.03135e-21	-2.27911e-21	-1.46597e-21
ACTB	1.05343e-21	3.1773e-22	1.34757e-21	4.03135e-21	-2.27911e-21	-1.46597e-21
ACTBL2	0.474749	0.903183	2.47817	6.25711	9.11743	8.25215
ACTG1	1.05343e-21	3.1773e-22	1.34757e-21	4.03135e-21	-2.27911e-21	-1.46597e-21
ACTG2	1.05343e-21	3.1773e-22	1.34757e-21	4.03135e-21	-2.27911e-21	-1.46597e-21
ACTL6A	0.175316	0.227046	0.27383	0.200495	0.222775	0.21324
ACTL8	1.05343e-21	3.1773e-22	-0.00100245	4.03135e-21	-2.27911e-21	-1.46597e-21
ACTN1	1.98758	1.25465	1.76372	1.27118	1.21882	1.19152
ACTN2	-0.119639	-0.0176926	0.0436736	0.0245198	0.243228	0.031704
ACTN3	-0.0527768	3.1773e-22	-0.0050656	4.03135e-21	0.000467285	-0.00782122
ACTN4	0.710494	0.398937	0.543796	0.631198	0.475585	0.264289
ACTR10	0.0101189	-0.00618439	0.0335517	0.0337575	0.00662274	0.00581429
ACTR1A	0.0772845	0.0286301	-0.018993	0.100089	0.137144	0.0408205
ACTR1B	0.0303832	-0.0057746	-0.0501269	-0.012428	-0.0161963	-0.0107002
ACTR2	0.291224	0.395197	0.923901	0.682535	0.313987	0.629129
ACTR3	1.05749	-0.0515059	1.23448	0.847558	1.17591	0.765945
ACTR3B	1.05343e-21	-0.00710013	0.0134044	-0.00617689	-0.00144413	-0.00263151
ACTR5	2.21319e-05	0.000209711	0.000911267	0.00242398	0.000114281	0.000654456
ACTR6	1.05343e-21	-0.000219649	0.00131018	5.49212e-05	0.000147452	-1.46597e-21
ACTRT3	1.05343e-21	3.1773e-22	-0.000420773	4.03135e-21	-2.27911e-21	-1.46597e-21
ACVR1C	1.05343e-21	-6.42754e-06	0.000158067	4.4474e-05	5.91525e-05	-1.46597e-21
ACY1	0.00112008	0.0047218	-5.17165e-05	0.00167217	0.00341795	-0.000153931
ACY3	1.05343e-21	3.1773e-22	0.000196887	4.03135e-21	-2.27911e-21	-1.46597e-21
ACYP1	0.0601379	0.037943	0.067275	0.0444883	0.0396766	0.0136933
ACYP2	4.59391e-06	3.1773e-22	1.34757e-21	1.82312e-05	0.000278624	0.000245095
ADA	0.0374602	0.0038454	0.0252902	0.0122299	0.0122007	0.0141033
ADAD2	1.05343e-21	3.1773e-22	-0.000139631	4.03135e-21	0.000157907	-1.46597e-21
ADAM10	0.00229393	-0.000290989	-0.00130572	0.000693712	0.00225631	0.00198907
ADAM12	-2.64105e-05	0.000109774	3.76215e-05	-5.45234e-05	-2.27911e-21	-1.46597e-21
ADAM15	0.000100736	0.00033004	-0.000631668	0.000178036	0.000448012	0.000257027
ADAM17	0.00412738	0.00106997	0.000889054	0.00177575	6.75433e-06	0.00125248
ADAM9	1.05343e-21	3.1773e-22	1.34757e-21	-8.76476e-05	-2.27911e-21	-1.46597e-21
ADAMTS1	1.05343e-21	3.1773e-22	1.34757e-21	-8.74251e-05	-2.27911e-21	-1.46597e-21
ADAMTS10	1.05343e-21	3.1773e-22	1.34757e-21	4.03135e-21	-0.000166219	-1.46597e-21
ADAMTS16	1.05343e-21	-0.00159934	1.34757e-21	4.03135e-21	-2.27911e-21	-1.46597e-21
ADAMTS17	1.05343e-21	3.1773e-22	9.36844e-05	-8.53318e-05	-1.17147e-05	-1.46597e-21
ADAMTS20	1.05343e-21	-1.28603e-05	1.34757e-21	-9.91595e-05	-2.27911e-21	-1.46597e-21
ADAMTS4	0.000186644	3.1773e-22	2.19983e-06	0.000157859	6.35752e-05	-1.46597e-21
ADAMTS9	1.05343e-21	3.1773e-22	1.34757e-21	-5.81003e-06	-2.27911e-21	-1.46597e-21
ADAMTSL1	-1.66159e-05	3.1773e-22	1.34757e-21	-3.08589e-06	-2.27911e-21	-1.46597e-21
ADAMTSL4	1.05343e-21	3.1773e-22	-1.64523e-05	5.78002e-05	-2.23982e-05	-4.1306e-06
ADAMTSL5	-5.00113e-05	3.1773e-22	1.34757e-21	1.21055e-05	-2.27911e-21	-3.08229e-05
ADAR	0.0414166	0.0316424	0.141854	0.0656723	0.0419152	0.0448501
ADARB1	1.05343e-21	3.1773e-22	1.34757e-21	0.000604729	-2.27911e-21	-1.46597e-21
ADAT1	1.05343e-21	3.1773e-22	1.34757e-21	4.03135e-21	-2.27911e-21	-1.46597e-21
ADAT2	1.05343e-21	3.1773e-22	-0.000111364	4.03135e-21	-2.27911e-21	0.00153639
ADAT3	1.05343e-21	3.1773e-22	1.34757e-21	4.03135e-21	-2.27911e-21	-1.71052e-05
ADCK1	1.05343e-21	3.1773e-22	-4.44455e-05	4.03135e-21	0.000141122	-1.46597e-21
ADCK3	0.00606105	7.27038e-06	0.0128064	0.00218446	6.66742e-05	0.00391053
ADCK4	0.0019073	0.000414243	0.00136005	0.00173984	0.000963745	-2.11878e-05
ADCK5	1.05343e-21	3.1773e-22	0.0005566	0.000130687	-1.15341e-06	-1.46597e-21
ADCY1	1.05343e-21	-0.000569243	-0.00262593	-0.000148572	-0.000248891	-0.000503323
ADCY3	1.05343e-21	3.1773e-22	1.34757e-21	0.000103717	-2.27911e-21	-0.000149483
ADCY4	-8.57923e-06	3.1773e-22	1.34757e-21	4.03135e-21	-2.27911e-21	-1.46597e-21
ADCY5	0.000328115	7.98641e-05	0.00371243	0.00128255	0.00101121	0.000447579
ADCY6	0.00178939	3.1773e-22	1.34757e-21	4.03135e-21	-2.27911e-21	-1.46597e-21
ADD1	0.00291341	-0.0046373	-0.00183423	0.0030479	-0.0169688	0.0128074
ADD2	-1.78765e-05	0.00044758	0.00636235	0.00187932	-0.000229942	0.00170593
ADD3	0.0560905	0.0470782	0.171665	0.0632125	0.0352062	0.0965065
ADGB	1.05343e-21	3.1773e-22	1.34757e-21	0.000335923	-2.27911e-21	-1.46597e-21
ADH1B	0.0685718	0.0200936	-0.0301235	0.085958	0.0668799	0.0854359
ADH1C	0.447665	-0.00153191	0.119728	0.0159477	0.155738	0.03361
ADH4	-7.79823e-05	-0.00615457	1.34757e-21	-0.000109613	-2.27911e-21	-0.00413721
ADH5	0.344004	0.0826666	0.136909	0.210362	0.144699	0.0734372
ADH6	1.05343e-21	3.1773e-22	1.34757e-21	4.03135e-21	-2.27911e-21	-0.000157795
ADH7	-0.553126	-0.897207	-0.905268	-0.588677	-0.615577	-0.836843
ADI1	0.0164343	0.024929	0.0451937	0.0304153	0.0319243	0.00429768
ADIPOQ	0.00113191	3.30576e-05	-0.000657017	-0.00143148	-0.00156601	-4.46014e-05
ADIRF	-0.0200534	0.0149298	0.0551226	0.138789	0.277816	0.104844
ADK	-0.00658367	-0.0135379	-0.00775954	0.00798607	0.00560485	0.00538605
ADNP	0.00522514	0.000155094	0.00563154	0.00630823	0.00481014	0.00173088
ADNP2	1.05343e-21	3.1773e-22	1.34757e-21	-0.000137771	-2.27911e-21	-7.02038e-05
ADO	-0.00324804	0.00846021	-0.00237238	0.00227955	0.00179665	0.000981951
ADPGK	0.00938838	0.00567656	0.0129261	0.0254679	0.0236316	0.0185826
ADPRH	1.05343e-21	3.1773e-22	1.34757e-21	0.00240769	0.000183798	-1.46597e-21
ADPRHL1	1.05343e-21	3.1773e-22	1.34757e-21	4.03135e-21	8.99172e-06	-1.46597e-21
ADPRHL2	0.005981	-0.00442699	0.0129661	0.0187748	0.00385357	0.0121809
ADRB1	1.05343e-21	3.1773e-22	0.000119328	9.1225e-05	-2.27911e-21	-1.46597e-21
ADRBK1	0.00420066	0.00394876	0.0263216	0.0108698	0.00316491	0.00394289
ADRM1	0.00333384	0.00599344	0.00594157	0.00963472	-0.00137065	0.00471754
ADSL	0.0472869	0.0154752	0.0237559	0.0335857	0.037724	0.026273
ADSS	0.243566	0.083093	0.246303	0.157344	0.166294	-0.169372
ADSSL1	0.0108114	0.0015404	0.0082094	0.00271671	0.0281409	0.00674926
AEBP1	0.00795491	0.0088263	0.0101534	0.0147687	0.0143682	0.0135071
AES	1.05343e-21	3.1773e-22	0.000298325	0.000568192	-0.000189997	0.00194078
AFAP1	0.000626196	-8.71098e-05	0.000638323	0.000191533	0.000806463	-1.46597e-21
AFAP1L1	0.00141961	-2.52381e-06	1.34757e-21	-0.00111935	-4.02411e-05	-1.46597e-21
AFAP1L2	0.0022283	0.000741543	-0.000101279	0.00167775	7.79177e-05	0.00229564
AFF1	1.05343e-21	3.1773e-22	1.34757e-21	4.03135e-21	-2.27911e-21	1.57122e-05
AFF2	5.48253e-05	0.000137203	-0.000281916	4.26653e-07	-4.32022e-05	0.000897426
AFF4	1.05343e-21	3.1773e-22	0.000161133	8.2449e-05	-2.82518e-06	3.91039e-05
AFG3L2	0.00620774	-0.000302964	0.0268113	0.0156571	-0.00158116	-0.00260867
AFM	0.000678768	4.58923e-07	0.00425509	0.0017706	9.39641e-05	0.000669966
AFMID	1.05343e-21	3.1773e-22	1.34757e-21	1.45695e-05	-5.73081e-05	-1.46597e-21
AFTPH	-2.87896e-05	-7.97733e-05	0.00077708	0.000642727	0.000433721	0.0006474
AGA	0.00245704	0.0326487	0.00718352	0.0173312	0.0153639	0.0078786
AGAP1	1.05343e-21	-4.03118e-06	1.34757e-21	4.03135e-21	-2.27911e-21	-1.46597e-21
AGAP3	1.05343e-21	3.1773e-22	8.41433e-05	1.17355e-05	-0.000350622	-0.00089646
AGBL2	-0.000777099	3.1773e-22	1.34757e-21	4.03135e-21	-2.27911e-21	-1.46597e-21
AGBL3	0.000105019	0.000158504	0.00103324	0.000362018	-2.27911e-21	0.00314183
AGFG1	0.00360961	0.00119602	0.0138637	0.0122791	0.0111367	0.00297465
AGFG2	-0.00293353	-0.000136062	-0.00115148	-0.000913827	-0.000276628	-0.000865621
AGK	0.00457012	0.00176298	0.0336566	0.0797526	0.0409577	0.0112108
AGL	0.0361619	-0.0177726	0.0117952	0.0311838	0.0180755	0.00624051
AGO1	0.0116361	-0.00282622	0.00240506	0.0136546	0.00376998	0.0107128
AGO2	0.0275741	0.00075692	0.0227199	0.0168776	0.0109048	0.00850492
AGO3	-2.6009e-05	1.81025e-05	0.00145515	0.000118618	-3.05912e-06	0.000319891
AGO4	1.05343e-21	3.1773e-22	1.34757e-21	4.03135e-21	-2.66255e-06	-1.46597e-21
AGPAT1	0.00981551	-0.00191282	0.0105809	0.0112259	0.0104284	0.0134449
AGPAT2	1.05343e-21	3.1773e-22	1.34757e-21	4.03135e-21	0.000930318	0.00156571
AGPAT3	0.00570498	0.000335322	0.0181274	-0.000966983	5.58537e-06	0.00504718
AGPAT5	-0.0013839	-0.00168426	4.06956e-07	-0.000374219	0.00228393	0.00170729
AGPAT6	1.05343e-21	3.1773e-22	1.34757e-21	4.03135e-21	-2.27911e-21	-1.46597e-21
AGPAT9	1.05343e-21	3.1773e-22	1.34757e-21	-2.52203e-05	-2.27911e-21	-1.46597e-21
AGPS	0.0151606	-0.0105757	0.0263873	0.010506	0.0128028	0.00884633
AGR2	0.0472642	0.620363	0.0356924	0.723852	0.35072	0.0909186
AGR3	1.05343e-21	-0.0233134	-0.00821436	0.0541417	-2.27911e-21	0.0493329
AGRN	0.0321245	0.00883989	0.0144655	0.0466435	0.00873082	0.0137631
AGT	-0.0171236	-0.00132052	0.00502918	-0.00824562	-0.031633	-0.0276615
AGTPBP1	3.09283e-05	9.2599e-05	-9.85311e-05	-4.91084e-05	-4.34265e-05	9.14635e-05
AGTRAP	0.0644875	0.00648013	0.0154326	0.0334165	0.0313162	0.0144571
AGXT	0.000864919	-0.000579368	1.34757e-21	-6.81358e-05	-2.27911e-21	-0.00597399
AGXT2	1.05343e-21	3.1773e-22	1.34757e-21	4.03135e-21	1.28612e-05	-1.46597e-21
AHCTF1	0.00140976	0.000407758	0.00319685	0.00314179	0.00261992	0.00148306
AHCY	1.10158	0.212169	0.53923	0.410153	0.165622	0.327948
AHCYL1	0.0024175	-0.00195199	1.10939e-05	0.0032987	0.00779496	0.00414566
AHCYL2	0.00514721	0.00478799	-0.00139871	0.00127019	0.00105004	-3.35289e-05
AHDC1	-0.000226524	-0.000559255	-0.000247062	0.000168561	0.00110389	-4.27521e-05
AHNAK	-1.99476	-1.60783	-1.86334	-1.94731	-2.11771	-1.6722
AHNAK2	-0.0633076	-0.0503477	-0.0631147	-0.0668449	-0.0801488	-0.0519605
AHR	0.000614289	0.000299738	0.0112501	0.00154873	0.00567288	0.000691602
AHSA1	0.158733	0.14397	0.233355	0.131601	0.24132	0.0453194
AHSG	0.00200612	0.0298415	0.099733	0.0954886	0.0329438	0.126429
AHSP	-0.00230132	0.00427986	0.00324235	0.0033133	-0.000905642	0.00113083
AIDA	0.0396187	0.0238195	0.0441313	0.0405622	0.0197983	0.0327957
AIF1	0.0937457	0.0328782	0.0705562	0.170006	0.147654	0.151279
AIF1L	-0.00689494	0.00436497	-0.0113391	-0.00935505	-0.00886886	-0.000204497
AIFM1	0.307682	0.491977	0.160736	0.249548	0.436981	0.152023
AIFM2	1.05343e-21	3.1773e-22	1.34757e-21	0.000264339	0.000511627	-1.46597e-21
AIM1	-0.0368897	-0.0326087	-0.02689	-0.0360738	-0.0383048	-0.0218074
AIM1L	-0.0208966	-0.018471	-0.0256711	-0.0343194	-0.0240564	-0.0147613
AIMP1	0.0392747	0.0209583	0.083124	0.0752597	0.108156	-0.00611102
AIMP2	0.0100553	-0.0165931	0.0226755	0.0265903	0.063868	0.00824536
AIP	0.13355	0.0824235	0.0279667	0.0665978	0.10922	0.0374825
AJUBA	7.38108e-05	-0.0004863	-0.000834646	0.00229389	0.000609471	-0.000198878
AK1	0.0169634	-0.0343332	0.0977801	0.0210019	-0.104273	0.0809922
AK2	0.221144	0.0859235	0.0979254	0.296116	0.495462	0.128698
AK3	0.0858363	-0.0196541	0.134381	0.0596847	0.0336687	0.0105882
AK9	0.000575879	3.1773e-22	1.34757e-21	6.87411e-05	0.000254103	1.92067e-05
AKAP1	0.00208245	-0.000207617	0.00210694	0.00108165	9.83536e-05	0.000825005
AKAP10	1.05343e-21	3.1773e-22	1.34757e-21	2.27214e-05	-2.27911e-21	-1.46597e-21
AKAP11	0.000395758	-0.000100677	1.34757e-21	0.000626874	-0.0003206	-1.46597e-21
AKAP12	-0.0007108	0.0033707	0.00737115	0.00993114	0.00950622	0.00862963
AKAP13	0.000413772	0.00361725	-0.00342225	0.00539997	0.00522387	0.0102197
AKAP17A	-5.30811e-05	4.9442e-05	-7.78607e-05	0.000302914	0.000314387	8.57435e-06
AKAP5	1.05343e-21	3.1773e-22	1.34757e-21	0.000364273	-0.00236993	-1.46597e-21
AKAP7	1.05343e-21	3.1773e-22	-4.16732e-05	-1.43697e-07	-2.27911e-21	-1.46597e-21
AKAP8	0.00220494	-0.000488451	0.00866805	0.00545894	0.00226734	0.00420997
AKAP8L	0.000213797	0.000416844	0.00443997	0.00121384	0.00216195	9.30424e-05
AKAP9	0.000484878	8.82338e-06	0.000120394	0.00105529	0.000531967	-0.000279815
AKNA	1.05343e-21	3.1773e-22	1.34757e-21	-3.02264e-05	-2.27911e-21	6.8084e-05
AKR1A1	0.602563	0.176383	0.302083	0.381401	0.822605	0.381561
AKR1B1	0.471187	0.148215	0.666416	0.465716	0.695268	0.296571
AKR1B10	3.99975	-0.472908	9.46867	2.53616	8.20149	-0.0971681
AKR1B15	0.00596164	-0.0126054	-0.0260904	0.0767111	0.103514	0.0111309
AKR1C1	1.05343e-21	3.1773e-22	1.34757e-21	4.03135e-21	-2.27911e-21	-1.46597e-21
AKR1C2	2.93934	0.00536374	2.63895	1.15824	4.53756	0.222515
AKR1C3	2.60959	-0.014484	4.54297	1.45689	2.14064	0.25135
AKR1C4	0.0663282	3.1773e-22	0.00605658	0.0348469	0.00409695	-1.46597e-21
AKR1D1	-8.40343e-05	3.1773e-22	1.34757e-21	0.00178273	0.00586424	0.0004212
AKR1E2	-0.0367798	-0.00165995	-0.00570098	-0.00598468	0.0023516	0.00146638
AKR7A2	0.19073	0.0685468	0.00253081	0.107967	0.186856	0.0428315
AKR7A3	3.55603e-05	-0.000109978	-0.0002166	0.000674002	-6.05474e-05	-1.46597e-21
AKT1	0.0110509	0.00259453	0.0104994	0.00819443	0.00896874	0.0141417
AKT1S1	0.0100914	0.000597462	0.00153656	0.0144778	0.0154018	0.000287353
AKT2	0.0111008	0.00203007	0.00325448	0.00513037	0.00667601	0.0029121
AKT3	1.05343e-21	0.00223356	0.0651176	0.0131856	0.000148032	0.00870243
AKTIP	0.00046548	6.99786e-05	0.000378751	-0.00101846	0.00387862	-0.00173732
ALAD	0.0492077	-0.0304646	0.0223573	0.00250597	-0.0539611	-0.0398161
ALB	-5.53953	12.4916	36.8936	46.4677	28.1709	23.4392
ALCAM	0.0573749	0.0714249	0.226132	0.0553592	0.122465	0.038075
ALDH16A1	0.072014	0.0235674	0.0218846	0.0750436	0.0670025	0.0566063
ALDH18A1	0.109457	0.0129779	0.112138	0.0964191	0.0993582	0.0567461
ALDH1A1	0.822604	0.760928	0.986866	1.02656	0.624067	0.361517
ALDH1A2	0.00908254	0.000517216	1.34757e-21	1.38316e-06	-2.27911e-21	-1.46597e-21
ALDH1A3	0.0265816	0.134193	0.0237171	0.173746	0.041588	0.0443989
ALDH1B1	0.0391138	0.124829	0.0679095	0.164252	0.305235	0.0470991
ALDH1L1	0.00230883	-0.00115258	0.00284316	-0.000347373	-0.00237174	-0.00047791
ALDH1L2	0.0189286	0.00764001	0.0225782	0.0173189	0.0144529	0.0429992
ALDH2	0.328087	-0.0942444	0.138111	0.586437	-0.078619	-0.138162
ALDH3A1	-1.54849	-2.3183	0.944204	1.40344	10.8705	-3.80798
ALDH3A2	-0.10239	-0.196067	-0.0323682	-0.103636	0.100092	-0.00584658
ALDH3B1	0.00117861	0.000154148	0.00423908	0.00109802	0.000224729	0.000152144
ALDH4A1	0.10493	-0.0659795	-0.0525445	-0.0524617	-0.0348176	-0.0333457
ALDH5A1	0.0498918	-0.0170963	0.0147088	0.0149439	0.022815	0.0830557
ALDH6A1	-0.0166286	-0.0328554	-0.0034041	0.0130985	0.0441527	-0.0327448
ALDH7A1	-0.0108188	-0.174183	-0.188559	0.0389544	-0.213013	-0.18687
ALDH8A1	1.05343e-21	3.1773e-22	0.000132794	0.0194196	-1.38957e-05	0.000127898
ALDH9A1	-0.18222	-0.0758787	-0.107958	-0.0509441	-0.138739	-0.122789
ALDOA	1.33073	-0.272931	1.59733	1.55448	5.74399	0.0891846
ALDOB	0.000446011	-0.00406943	1.34757e-21	-0.000131518	-0.000174862	-0.00473714
ALDOC	0.724179	-0.151105	-0.190746	0.0734606	1.04111	-0.0961438
ALG1	0.00311625	0.000927065	0.00828336	0.00341884	0.00214577	0.00360516
ALG10	1.05343e-21	3.1773e-22	1.34757e-21	3.86485e-06	2.50933e-05	-1.46597e-21
ALG11	0.00195663	-0.000451904	0.0127933	0.00281389	0.000268972	0.00693671
ALG12	0.00314093	0.00300573	0.0064978	0.00828429	0.0174649	0.0149215
ALG13	1.05343e-21	3.1773e-22	-0.000922059	-0.00639038	-0.00117957	-1.46597e-21
ALG14	0.000201151	3.1773e-22	1.34757e-21	0.00164916	0.00291805	0.00718411
ALG2	0.341886	-0.0240422	0.0422508	0.192665	0.201259	0.024623
ALG3	0.0191479	0.00165512	0.00969727	0.00908717	0.0137272	0.00612295
ALG5	0.041833	0.0687909	0.101535	0.0620814	0.0529493	0.0897066
ALG6	0.000271228	-0.000441503	0.000833138	0.00143221	0.00174783	0.00287645
ALG8	1.05343e-21	3.1773e-22	1.34757e-21	3.94474e-05	-2.27911e-21	-1.46597e-21
ALG9	0.000340027	-0.000435577	-0.00214223	0.00106846	0.000592193	0.000982542
ALKBH4	1.05343e-21	3.1773e-22	-0.000207987	4.03135e-21	-2.27911e-21	-1.46597e-21
ALKBH5	0.00184708	0.0120944	0.00249197	0.00357076	0.00348688	0.00243196
ALKBH6	1.05343e-21	3.1773e-22	-3.07415e-05	4.03135e-21	-2.27911e-21	-1.46597e-21
ALKBH7	6.73619e-05	3.1773e-22	1.34757e-21	1.54422e-05	-2.27911e-21	-1.46597e-21
ALOX12	-0.0354399	-0.03639	-0.0302923	-0.0303456	-0.0249284	-0.0156874
ALOX12B	-0.000151488	0.00447318	0.00611936	-7.62267e-05	0.00263361	-9.72829e-05
ALOX15	0.0141714	0.0324322	0.0226779	0.0204589	0.00335859	0.0104058
ALOX15B	-0.0344552	-0.0410008	-0.035424	-0.0427502	-0.0275138	-0.012616
ALOX5	0.0188781	0.0142094	0.0235671	0.0173863	0.0251697	0.0223675
ALOX5AP	-0.000270432	-2.9317e-05	0.00191739	0.000834127	0.00635919	-0.000341189
ALPL	0.0149136	-0.00164979	0.000408365	0.00611849	0.00335034	0.000345424
ALS2CL	-0.000187253	-0.00060158	-0.000852826	-0.000368455	-0.000411524	-0.000648901
ALS2CR11	1.05343e-21	3.1773e-22	1.34757e-21	4.03135e-21	-2.27911e-21	-1.46597e-21
ALX1	1.05343e-21	3.1773e-22	1.34757e-21	4.03135e-21	-2.27911e-21	0.000188764
ALX4	1.05343e-21	3.1773e-22	1.34757e-21	0.00061032	0.000332492	-1.46597e-21
ALYREF	0.179177	0.0610615	0.177431	0.204161	0.255645	0.0720973
AMACR	-0.000609473	-0.00106111	-0.0132117	-0.010727	-0.00281796	-0.000583922
AMBP	0.013061	-0.000678508	0.00613045	0.0248007	0.0365255	0.0111416
AMBRA1	1.05343e-21	3.1773e-22	-0.000104773	-1.01864e-05	-0.000111526	-1.46597e-21
AMDHD2	0.00914301	-0.00103605	0.00216704	0.00222989	0.00420153	0.00503165
AMFR	-6.88385e-05	-0.0003431	-6.66032e-05	0.000805306	-0.000633629	-0.000166586
AMH	1.05343e-21	-0.000396583	1.34757e-21	4.03135e-21	-2.27911e-21	-1.46597e-21
AMIGO2	1.05343e-21	3.1773e-22	1.34757e-21	4.03135e-21	-2.27911e-21	6.23342e-05
AMOTL1	1.05343e-21	3.1773e-22	-8.661e-05	4.03135e-21	0.000298945	-1.46597e-21
AMOTL2	1.05343e-21	3.1773e-22	1.34757e-21	-1.60009e-05	-1.9937e-05	-6.30986e-05
AMPD2	0.00774832	0.00224198	0.0116824	0.00733683	0.00389529	0.0108882
AMPD3	0.000583663	0.00174417	0.0089746	0.00396034	0.00156043	0.00568749
AMY2A	1.05343e-21	3.1773e-22	1.34757e-21	0.000369151	-2.27911e-21	-1.46597e-21
AMZ1	1.05343e-21	1.21848e-05	1.34757e-21	0.000103843	-2.27911e-21	-1.46597e-21
AMZ2	1.05343e-21	3.1773e-22	1.34757e-21	0.000113038	-2.27911e-21	-1.46597e-21
ANAPC1	6.51072e-05	4.00705e-06	0.000374957	0.000136233	5.87103e-05	0.000168689
ANAPC13	0.000114013	6.34467e-06	4.55386e-06	0.00020242	0.00123873	-1.68453e-05
ANAPC15	1.05343e-21	3.1773e-22	1.34757e-21	4.03135e-21	-2.27911e-21	-1.46597e-21
ANAPC16	1.05343e-21	3.1773e-22	0.028197	4.03135e-21	0.00200664	-1.46597e-21
ANAPC2	0.000144698	3.1773e-22	-9.42738e-05	0.000330489	-4.77865e-05	0.000340616
ANAPC4	0.000194227	-5.78038e-05	-0.000127358	0.000164333	2.67006e-05	0.000171616
ANAPC5	9.14505e-05	-3.10599e-06	0.000186913	4.76548e-05	1.94927e-05	1.20093e-05
ANAPC7	0.00344478	-3.00424e-06	0.00143713	0.00175262	0.00100608	0.000844862
ANG	1.05343e-21	3.1773e-22	1.34757e-21	4.03135e-21	-2.27911e-21	-1.46597e-21
ANGEL2	0.00127052	-0.000502532	0.00264836	0.00369628	0.00276223	-0.000117362
ANGPT1	1.05343e-21	3.1773e-22	1.34757e-21	4.03135e-21	-0.000200991	-1.46597e-21
ANGPTL2	0.00341419	0.000906306	0.00168937	0.00065706	0.0033166	0.00128365
ANGPTL6	1.05343e-21	3.1773e-22	1.18734e-05	4.03135e-21	3.62576e-05	2.19958e-06
ANK1	0.0023475	0.00635715	0.0476649	0.0105776	0.000118106	0.00998439
ANK2	0.000919617	0.000538154	0.00225078	0.00239362	0.000693926	0.00102588
ANK3	0.00645083	-0.00226471	0.0136208	0.0123649	-0.00186235	0.00363054
ANKAR	1.05343e-21	3.1773e-22	1.34757e-21	8.05287e-05	0.000131591	-1.46597e-21
ANKFY1	0.171817	0.23454	-0.0170806	0.0980423	0.0349105	0.0494585
ANKH	1.05343e-21	3.1773e-22	0.000266894	0.000175213	4.30148e-05	-1.46597e-21
ANKIB1	1.05343e-21	3.1773e-22	1.34757e-21	4.03135e-21	2.92323e-06	-1.46597e-21
ANKK1	1.05343e-21	3.1773e-22	-0.00270335	1.71588e-05	1.9823e-06	-1.46597e-21
ANKLE1	1.05343e-21	-0.000350525	1.34757e-21	4.03135e-21	-2.27911e-21	-1.46597e-21
ANKLE2	0.000161312	-1.50972e-05	0.00141762	0.000515947	3.20429e-05	0.000288829
ANKMY2	0.000379346	0.000435793	0.000721351	0.000402925	-2.27911e-21	0.00021461
ANKRD10	1.05343e-21	3.1773e-22	1.34757e-21	4.03135e-21	4.94664e-05	-1.46597e-21
ANKRD13A	0.00540573	0.000841865	0.000966538	0.00297233	0.000892736	0.00288607
ANKRD13D	1.05343e-21	3.1773e-22	1.34757e-21	4.76587e-07	-2.27911e-21	7.68449e-05
ANKRD16	1.05343e-21	3.1773e-22	1.34757e-21	-7.66489e-05	-2.27911e-21	-1.46597e-21
ANKRD17	0.00253685	-0.000872965	0.00159732	0.00474082	0.00513581	-0.000173511
ANKRD22	-0.0370113	-0.0319366	-0.0396911	-0.015019	-0.027933	-0.0244676
ANKRD24	-0.000114584	3.1773e-22	-2.38878e-05	4.16972e-05	-2.27911e-21	-1.46597e-21
ANKRD27	1.05343e-21	3.1773e-22	9.63987e-05	1.60342e-05	-6.21981e-06	2.52201e-05
ANKRD28	0.00106216	-0.000197443	0.000413641	0.000480129	0.00135248	0.000282038
ANKRD29	1.05343e-21	3.1773e-22	-0.000160492	7.9246e-05	-2.27911e-21	0.0029822
ANKRD30A	1.05343e-21	3.1773e-22	1.34757e-21	4.03135e-21	-2.27911e-21	-0.000222006
ANKRD30B	-5.30864e-05	3.1773e-22	1.34757e-21	-3.62217e-05	-2.27911e-21	-1.46597e-21
ANKRD32	1.05343e-21	3.1773e-22	1.51215e-05	-9.86601e-05	-2.27911e-21	-1.46597e-21
ANKRD35	-0.00111296	-0.0034049	-0.0040779	-0.00294611	-0.00173885	-0.00145267
ANKRD40	1.05343e-21	3.1773e-22	1.34757e-21	4.03135e-21	4.95311e-06	-1.46597e-21
ANKRD44	0.00147484	-0.000234606	0.00647815	0.00554518	0.00952592	0.00988168
ANKRD49	-0.000321684	3.1773e-22	1.34757e-21	-5.8214e-05	-2.27911e-21	-1.46597e-21
ANKRD50	1.05343e-21	4.263e-06	1.34757e-21	5.58722e-05	2.3291e-05	-3.44692e-06
ANKRD52	1.05343e-21	3.1773e-22	1.34757e-21	1.22753e-05	6.60518e-05	-1.46597e-21
ANKRD54	1.05343e-21	3.1773e-22	1.34757e-21	4.03135e-21	-2.27911e-21	3.0304e-05
ANKRD55	1.05343e-21	3.1773e-22	1.34757e-21	0.00010636	-2.27911e-21	-1.46597e-21
ANKRD6	1.05343e-21	3.1773e-22	1.34757e-21	4.03135e-21	-2.27911e-21	-3.93002e-05
ANKS1A	0.000898042	-6.33135e-05	0.00205066	0.0021225	0.00155956	0.000895172
ANKS1B	1.05343e-21	3.1773e-22	1.34757e-21	4.03135e-21	2.76465e-06	-1.46597e-21
ANKS3	1.05343e-21	3.1773e-22	1.34757e-21	4.03135e-21	-2.27911e-21	-1.46597e-21
ANKS4B	1.05343e-21	3.1773e-22	1.34757e-21	4.03135e-21	-2.27911e-21	8.79368e-05
ANKS6	1.05343e-21	3.1773e-22	1.34757e-21	1.2343e-05	-2.27911e-21	-1.46597e-21
ANKZF1	-0.000226948	-0.000298042	0.00109333	0.00053331	-0.000595186	-0.000443408
ANLN	0.000127102	-0.0013311	5.252e-05	1.52602e-05	-0.000389124	0.0028282
ANO1	-0.0010968	3.1773e-22	1.34757e-21	0.000103971	-2.27911e-21	-1.46597e-21
ANO10	-0.00205248	-0.00242339	0.00356308	-0.00109269	0.000772189	-0.000216969
ANO6	1.05343e-21	6.22462e-05	0.000930624	0.00115245	0.000284683	0.000844515
ANP32A	0.518225	0.313174	0.571782	0.623411	0.860242	0.563324
ANP32B	0.896456	0.689149	1.05078	0.702126	0.988427	0.56339
ANP32D	6.19185e-05	3.1773e-22	1.34757e-21	5.42238e-05	0.000398841	-1.46597e-21
ANP32E	0.983448	0.649371	0.59313	1.11228	1.54671	0.479819
ANPEP	0.00434945	0.00629682	0.0180759	0.0131372	0.00458253	0.00973203
ANTXR1	1.05343e-21	3.1773e-22	1.34757e-21	5.96427e-05	-2.27911e-21	-1.46597e-21
ANXA1	-302.284	-165.915	-219.008	-254.189	-215.228	-149.21
ANXA10	0.0550664	-0.000849846	0.00308973	-0.00145618	0.00120298	0.000129769
ANXA11	0.178228	-0.0607579	0.0440452	-0.110947	-0.0707596	-0.0063627
ANXA13	1.05343e-21	3.1773e-22	1.34757e-21	0.000259762	-0.000255069	-1.46597e-21
ANXA2	-11.4521	-12.7309	-13.1051	-16.2104	-14.24	-12.5712
ANXA3	-0.0348241	-0.0203095	0.0880914	0.0162969	-0.064109	-0.0500951
ANXA4	0.513919	0.145255	0.176286	0.243087	0.226472	0.0938101
ANXA5	3.01269	2.17796	3.41512	3.34851	2.28634	3.97327
ANXA6	4.30596	1.54337	2.58058	2.28186	3.33863	3.23793
ANXA7	0.260099	0.100187	-0.000652527	0.105758	0.138595	-0.0617429
ANXA8L2	-0.310095	-0.336428	-0.3696	-0.343587	-0.373498	-0.195819
ANXA9	-0.0437741	-0.00834439	-0.126513	-0.0505912	-0.0132055	-0.012262
AOC1	0.000234671	3.1773e-22	1.34757e-21	0.00300049	-2.27911e-21	-1.46597e-21
AOC3	0.528278	0.0947275	0.143664	0.124415	0.167748	0.10673
AOX1	1.05343e-21	0.000890013	-3.03482e-05	5.2333e-05	0.000421869	0.000525231
AP1B1	-0.0117284	-0.00448365	-0.0124273	0.0732815	0.0699512	0.0343971
AP1G1	0.00133254	-0.00634362	0.00551164	0.00528577	-0.00150149	0.00160636
AP1G2	-0.00108942	-0.00201405	0.00966099	0.00486801	-0.00119879	0.000999947
AP1M1	0.0340209	0.0124886	0.0197547	0.0354401	0.0262731	0.0128669
AP1M2	0.000770625	-0.0909001	-0.00878096	-0.057072	-0.0365464	-0.0314538
AP1S1	-1.23718e-05	-0.00997858	0.0172647	-0.00665516	-0.0167502	0.00531318
AP1S2	0.00585287	0.00369271	0.0112373	0.0066915	0.00773592	0.0127716
AP1S3	-0.00121013	-0.00652245	-0.00126676	0.000200314	-0.000375923	-0.00171587
AP2A1	0.0991359	0.0114426	0.0346832	0.0484785	0.0572509	0.0122146
AP2A2	0.10637	-0.00569212	0.00889655	0.0489793	0.053717	0.0114294
AP2B1	0.0738353	0.0629249	0.112644	0.105024	0.0848547	0.0485451
AP2M1	0.0769095	0.00548409	0.0484956	0.0466368	0.0747145	0.018752
AP2S1	0.684566	-0.00303847	0.135684	0.246554	0.88166	0.0312124
AP3B1	0.0191032	-0.000917846	0.0289388	0.0159583	0.000409235	0.00919245
AP3B2	1.05343e-21	3.1773e-22	1.34757e-21	3.17932e-05	-2.27911e-21	-1.46597e-21
AP3D1	0.0205952	0.00758595	0.0206475	0.025451	0.0208062	0.0116513
AP3M1	0.0262851	0.00103701	0.0680723	0.0151824	-0.00645086	0.00588092
AP3M2	0.00394255	3.1773e-22	1.34757e-21	0.000142135	-2.27911e-21	-1.46597e-21
AP3S1	0.33819	0.0287115	-0.035695	0.0488116	0.0413566	0.0628325
AP3S2	1.05343e-21	0.000208167	1.34757e-21	4.03135e-21	-2.27911e-21	-1.46597e-21
AP4B1	1.05343e-21	3.1773e-22	1.34757e-21	4.03135e-21	-7.54352e-06	-1.08542e-05
AP4E1	8.05904e-05	3.1773e-22	1.34757e-21	1.19308e-05	0.000141051	-1.46597e-21
AP4M1	-4.92439e-05	0.000991881	-0.00147704	0.000683285	-2.21049e-05	4.07515e-06
AP4S1	8.31092e-06	7.33652e-05	0.000183624	0.000620194	0.000418103	9.09553e-05
AP5B1	0.000849457	-0.000189389	2.19889e-06	0.000266835	0.00623801	-0.000333792
AP5M1	0.00314478	-5.28673e-05	-8.68406e-05	0.000216615	0.00088973	-1.46597e-21
AP5S1	2.98628e-05	3.1773e-22	1.34757e-21	0.000123844	0.000217465	-7.06672e-06
AP5Z1	-1.37336e-05	3.46604e-05	0.000165759	0.000152143	-0.000253396	4.1801e-05
APAF1	1.12659e-05	1.4043e-05	0.000112082	3.16939e-05	4.99437e-05	0.000187502
APBA1	-0.00236234	-0.00233563	-0.00186958	-0.00181014	-0.00278518	-0.000527852
APBA3	1.05343e-21	3.1773e-22	1.34757e-21	4.03135e-21	0.000157503	-1.46597e-21
APBB1	1.05343e-21	3.1773e-22	0.000621475	9.66617e-05	-3.77275e-06	-1.46597e-21
APBB1IP	1.05343e-21	-0.00022402	1.34757e-21	9.80426e-05	-5.93637e-05	-1.46597e-21
APBB2	1.05343e-21	3.1773e-22	1.34757e-21	4.03135e-21	-2.27911e-21	-1.46597e-21
APC2	1.66218e-06	3.1773e-22	-4.39164e-06	-4.66045e-08	-2.5503e-06	-1.46597e-21
APCDD1	-0.00022755	3.1773e-22	1.34757e-21	4.03135e-21	-2.27911e-21	-1.46597e-21
APCS	0.101335	0.128815	-0.000370281	0.0228276	0.0801966	0.0950234
APEH	0.0164432	-0.0198382	0.000774696	0.00448206	0.0203235	0.00407752
APEX1	0.332679	0.04757	0.136688	0.249965	0.507012	0.101569
APEX2	-0.000129502	-0.000249552	0.00150915	0.00055608	-0.00029572	0.000414743
APH1A	1.05343e-21	3.1773e-22	1.34757e-21	-8.26259e-05	-2.27911e-21	-1.46597e-21
API5	0.131988	0.0762834	0.227641	0.189158	0.109019	0.144625
APIP	0.0229175	0.00244347	0.00852111	0.0184402	0.0162739	0.00286112
APLF	1.05343e-21	3.1773e-22	1.34757e-21	2.29139e-07	-2.27911e-21	-1.46597e-21
APLP2	1.05343e-21	3.1773e-22	1.34757e-21	4.03135e-21	7.58927e-05	-1.46597e-21
APMAP	0.260979	0.108716	0.195561	0.243903	0.161995	0.163206
APOA1	6.32476	4.35343	3.76095	6.68088	6.13273	3.35437
APOA1BP	0.0977871	0.0836608	0.17131	0.137443	0.234292	0.0494976
APOA2	-0.0544924	-0.0879691	-0.0760892	-0.0468602	-0.0256387	-0.0596294
APOA4	0.122261	-0.122566	-0.00366508	0.0620769	0.046853	-0.0723874
APOB	0.0337989	-0.0428805	0.0186311	0.0308361	-0.00874615	-0.0543285
APOBEC3B	1.05343e-21	3.1773e-22	0.000316777	0.000426366	5.08387e-05	-1.46597e-21
APOBEC3C	0.00371351	0.00489358	0.714768	0.0181496	0.000883708	0.00129799
APOBEC3F	0.00139857	3.77392e-05	-0.000149035	0.000964891	0.000452618	0.000692057
APOBEC3G	1.05343e-21	3.1773e-22	1.34757e-21	4.03135e-21	-2.27911e-21	0.000262016
APOBR	0.00443241	0.0100806	0.0550849	0.0291154	0.0136875	0.0365171
APOC1	-0.0658119	-0.0358183	0.17109	-0.0476522	-0.190034	0.00225353
APOC2	-0.0223435	-0.0231892	0.0434922	0.00241552	0.0798004	-0.0314718
APOC3	-0.227733	-0.0671896	-0.292286	-0.257747	-0.413476	0.154127
APOC4	1.05343e-21	3.1773e-22	1.34757e-21	-0.000705733	-0.000109123	-7.24081e-05
APOD	0.0193887	-0.168086	-0.0546666	-0.0228525	-0.147579	0.0826439
APOE	-0.00515638	-9.57485e-05	0.0642744	0.0352733	0.0093246	0.0247858
APOF	-0.00492367	0.000272227	-0.000133951	0.000645083	-0.000827692	-0.000742969
APOH	-0.00320219	-0.000492965	-0.000559275	0.000321763	0.000704047	-0.000203212
APOL1	0.00187888	0.000253624	0.00276584	-6.99845e-06	-0.0013174	-0.000685034
APOL2	0.00019227	0.00200986	0.00121159	0.00234534	0.00554676	0.00489044
APOL3	1.05343e-21	3.1773e-22	1.34757e-21	4.03135e-21	-2.27911e-21	0.000460443
APOL4	1.05343e-21	3.1773e-22	1.34757e-21	0.000434385	-2.27911e-21	-0.00170465
APOM	-0.00149147	8.2145e-05	-0.000163645	0.00280377	-0.000497771	-0.00203761
APOO	0.0112844	0.00463221	0.0519671	0.012804	-0.00260006	0.000562234
APOOL	0.00171445	0.00224184	0.0022603	0.00434509	0.00324436	0.00159333
APP	0.00668545	0.00281179	0.0062314	0.0164184	0.00688687	0.0141042
APPL1	0.00506459	-0.00284712	-0.00488334	0.00811938	-0.00820043	0.0152918
APPL2	0.00162098	-0.0035206	0.0063758	0.0056662	-0.00405438	0.00358416
APRT	0.724823	0.198711	-0.0059858	0.421402	0.687297	0.534613
APTX	0.000638001	-8.13924e-05	0.00249445	0.00230865	0.00212501	0.000436435
AQP1	-0.000991992	-0.0210908	0.0208805	0.0163634	0.0161581	0.0528629
AQP11	1.05343e-21	0.00243255	1.34757e-21	4.03135e-21	-2.27911e-21	-1.46597e-21
AQR	0.0202228	6.41254e-05	0.0155408	0.0102609	0.00112455	0.00323977
ARAF	0.00259808	-1.76499e-05	0.00214904	0.00119222	-0.000174958	0.000107845
ARAP1	0.00615211	0.00359071	0.0103131	0.00797616	0.00452858	0.00750583
ARAP2	-0.000119981	5.3203e-05	1.34757e-21	-3.93731e-05	-0.000128532	-1.46597e-21
ARAP3	1.05343e-21	3.1773e-22	-2.60023e-05	1.11784e-05	5.14605e-05	-1.46597e-21
ARC	1.05343e-21	3.1773e-22	1.34757e-21	-1.07756e-05	-2.27911e-21	-1.46597e-21
ARCN1	0.306664	0.031075	0.155599	0.112136	0.227012	0.133271
AREL1	0.000234997	-0.000145376	0.000256681	0.000110449	-0.000222988	-0.000617524
ARF1	1.05343e-21	3.1773e-22	1.34757e-21	4.03135e-21	-2.27911e-21	-1.46597e-21
ARF4	1.08286	-0.0942637	0.614287	0.42217	0.860216	0.701087
ARF5	0.11119	0.0711697	0.501718	0.808245	0.882042	0.673471
ARF6	-0.211113	-0.195764	-0.142779	-0.343753	0.0516287	-0.244211
ARFGAP1	0.0398111	0.00685236	0.0314329	0.0218479	0.0182382	0.0336058
ARFGAP2	-0.00261489	-0.0120201	0.016409	0.0138698	-0.00140522	0.00585161
ARFGAP3	-0.0269608	0.00672272	0.0141908	0.0206188	0.0175349	0.0116221
ARFGEF1	0.00418407	0.00110524	0.00221549	0.00409885	0.00700232	0.00022418
ARFGEF2	-0.00258986	-0.0125907	-0.0113632	0.0128593	0.0107729	0.00877353
ARFIP1	0.0347872	0.00994874	0.0103032	0.0101056	0.00121011	0.0156451
ARFIP2	0.0247287	-0.00649208	0.0015323	0.00613786	-0.000596843	-0.0023807
ARFRP1	0.0044962	0.00383519	1.34757e-21	4.03135e-21	0.000197445	-1.46597e-21
ARG1	-0.000569738	0.00946152	0.0139126	0.00654807	0.00686404	0.00205497
ARG2	0.00970831	-0.00171436	-0.00210226	0.00180756	-0.00107951	0.000277144
ARGLU1	1.05343e-21	0.000237155	0.00094593	9.81147e-05	-2.27911e-21	-1.46597e-21
ARHGAP1	0.0448275	0.0714219	0.139222	0.0268557	0.0305442	0.0723997
ARHGAP10	-0.000482142	-0.000172518	-0.000392308	4.09437e-05	-0.000127802	-0.000670105
ARHGAP11A	-3.24441e-05	3.1773e-22	1.34757e-21	4.03135e-21	-2.27911e-21	-1.46597e-21
ARHGAP15	1.05343e-21	3.1773e-22	1.34757e-21	2.30265e-05	1.05362e-05	-1.46597e-21
ARHGAP17	0.0152476	0.00629137	0.0111049	0.0218187	0.0197334	0.0285147
ARHGAP18	0.000154236	3.1773e-22	0.000421474	0.000245965	8.76155e-05	0.000544714
ARHGAP21	1.05343e-21	-3.6483e-06	1.34757e-21	0.000103383	-1.20234e-05	-1.46597e-21
ARHGAP22	-0.00359109	-0.000537194	2.83733e-05	0.000531732	-0.000914133	-0.00209964
ARHGAP23	1.05343e-21	3.1773e-22	1.34757e-21	4.03135e-21	-0.000586972	-1.46597e-21
ARHGAP25	0.00204402	0.00419856	0.0088068	0.0113671	0.0198837	0.0254309
ARHGAP26	0.000639663	0.0020559	-0.000220498	0.00206138	0.00454038	7.16512e-05
ARHGAP27	-0.00213061	-0.000490914	-0.00302601	-0.00258147	-0.00144101	0.00169786
ARHGAP29	0.000400246	-0.00283293	-0.00157566	-0.000557335	-0.00216039	-0.000810083
ARHGAP30	0.00181433	3.3291e-05	0.00164987	0.000518707	0.00174097	0.00185451
ARHGAP32	-0.000120392	-0.00011207	-8.37387e-05	-0.000109689	-0.000115252	-5.28968e-05
ARHGAP33	0.000132512	3.1773e-22	-7.74066e-06	1.83633e-05	-2.27911e-21	0.000724163
ARHGAP35	0.000940736	-0.000273716	0.00155199	0.00164525	0.00333679	0.000734064
ARHGAP39	1.05343e-21	3.1773e-22	1.34757e-21	4.03135e-21	-2.27911e-21	-0.000134776
ARHGAP4	0.0177029	0.0100186	0.0166563	0.0156726	0.025044	0.0316145
ARHGAP42	1.05343e-21	3.1773e-22	1.34757e-21	4.03135e-21	-8.93948e-06	0.000117711
ARHGAP5	-0.000273307	-0.000198873	0.00106798	-0.0003138	-0.000454845	-0.000306132
ARHGAP6	1.05343e-21	3.1773e-22	1.34757e-21	4.03135e-21	-2.27911e-21	3.55828e-05
ARHGAP9	1.05343e-21	3.1773e-22	-0.00115836	0.00237079	0.000276619	8.08411e-05
ARHGDIA	2.28277	0.253051	1.44866	1.15716	2.51959	0.7178
ARHGDIB	0.13078	0.0450101	0.40163	0.264053	0.261296	0.475382
ARHGEF1	0.0881203	0.0432606	0.0954149	0.103098	0.173345	0.113725
ARHGEF10	1.05343e-21	3.1773e-22	1.34757e-21	5.79272e-05	-2.27911e-21	-1.46597e-21
ARHGEF10L	-0.0112573	-0.00938313	-0.0128058	-0.0173593	-0.0164458	-0.0141186
ARHGEF11	4.04172e-05	-0.000120639	0.00149434	1.91378e-05	0.000112781	1.01176e-05
ARHGEF12	0.00211961	-0.0273912	0.0477433	0.0256434	-0.00553626	-0.00226035
ARHGEF15	7.92536e-05	-0.000216625	-0.000179862	0.00117328	-7.12099e-05	3.62254e-05
ARHGEF16	0.010839	-0.0163796	-0.00732524	0.00403795	0.0550713	-0.00186094
ARHGEF17	-6.06811e-06	0.000963185	0.00121233	-7.36302e-05	-5.29169e-05	0.0010123
ARHGEF18	-9.34917e-05	0.000800126	-0.000449854	0.00156613	0.00254422	0.000596932
ARHGEF19	1.05343e-21	3.1773e-22	1.34757e-21	0.000209612	0.00186795	-1.46597e-21
ARHGEF2	0.00621261	0.00409237	0.0241047	0.0141043	0.00940119	0.0230428
ARHGEF28	1.05343e-21	3.1773e-22	1.34757e-21	4.78828e-05	-2.27911e-21	-7.31964e-05
ARHGEF37	0.000606047	0.00446229	-0.00335744	0.00179862	-0.00266771	-0.000600512
ARHGEF4	0.000194847	3.1773e-22	0.000681002	4.03135e-21	7.31482e-05	0.000524211
ARHGEF40	0.000134555	0.000187537	-5.34895e-05	0.000485782	2.09487e-05	5.24838e-05
ARHGEF5	1.05343e-21	3.1773e-22	-8.67185e-05	1.68747e-05	-2.27911e-21	-1.46597e-21
ARHGEF6	0.00311182	0.00350086	0.00741858	0.00401929	0.00717176	0.0121172
ARHGEF7	0.00711343	0.00403307	0.00837846	0.0094828	0.00600027	0.00843654
ARHGEF9	1.05343e-21	3.1773e-22	1.34757e-21	-0.000199126	-2.27911e-21	-1.46597e-21
ARID1A	0.00258117	0.00155501	0.00170316	0.00247081	0.00148153	0.00146701
ARID1B	2.52897e-05	-1.83275e-05	-5.33948e-06	0.000277807	6.78194e-05	0.000296307
ARID2	0.000281326	-3.5925e-05	0.00029413	0.000255706	0.000275898	0.000234332
ARID3A	1.05343e-21	3.1773e-22	0.00111089	0.000154948	0.00332698	0.00244122
ARID4B	0.000533785	3.1773e-22	1.34757e-21	0.00284549	-2.27911e-21	-1.46597e-21
ARIH1	0.000500422	-0.00285277	0.0110359	0.00518287	-0.00147978	0.000569682
ARIH2	-0.000293346	0.00208108	0.000618683	0.0016223	0.00329633	0.00251904
ARL1	0.0455801	-0.020572	-0.0426348	0.0873601	0.0264177	0.00587933
ARL15	0.0293785	0.0345604	0.00489873	0.00117483	0.00145167	0.000598314
ARL2	0.0395917	0.177937	-0.0437172	0.0313678	-0.0355347	-0.0450015
ARL2BP	0.0696539	0.00340449	0.0867534	0.00389721	0.0059274	0.00916736
ARL3	0.0588842	0.0390859	0.049838	0.0774619	0.040718	0.0634944
ARL4C	1.05343e-21	3.1773e-22	1.34757e-21	4.03135e-21	-2.17178e-05	-1.46597e-21
ARL6	0.000233637	3.1773e-22	0.000775292	0.000155714	-2.27911e-21	-1.46597e-21
ARL6IP1	0.000511249	0.00390427	0.0194737	0.00815927	0.00108154	-0.0086594
ARL6IP4	0.027497	0.000896161	0.0241729	0.0133104	0.0451335	0.0225274
ARL6IP5	0.0810089	0.170897	0.56195	0.471608	0.371388	0.475767
ARL6IP6	0.0020755	-0.000703586	0.00302381	0.00369955	-0.000238324	0.000833416
ARL8A	0.00778807	0.0177491	0.000426434	0.0220525	0.0346942	-1.46597e-21
ARL8B	-0.0100299	0.0497647	-0.00851141	0.0838154	0.0372675	0.0251551
ARMC1	0.00643539	0.00268382	0.014591	0.0189974	0.0230089	-0.000368475
ARMC10	0.0214628	-0.0160575	0.0215642	0.0481154	-0.000575768	0.00494331
ARMC3	1.05343e-21	3.1773e-22	1.34757e-21	-4.45462e-06	-2.27911e-21	-1.46597e-21
ARMC5	1.05343e-21	3.1773e-22	1.34757e-21	-3.37278e-05	-2.27911e-21	-1.46597e-21
ARMC6	0.0022794	0.00207519	0.00437171	0.00275303	0.00140004	0.000807614
ARMC8	0.00285415	0.00417785	0.00751413	0.00493473	0.00327564	0.00400098
ARMC9	1.05343e-21	3.1773e-22	1.34757e-21	-2.84621e-06	-2.27911e-21	-1.46597e-21
ARMCX1	1.05343e-21	0.000441144	0.00567341	0.00215443	0.000632507	0.000350891
ARMCX2	-0.00012645	3.1773e-22	0.000208751	0.000158777	-8.24314e-05	8.49565e-05
ARMCX3	-0.00573064	0.012297	1.34757e-21	0.0281076	-0.000871733	0.00682043
ARMCX5	1.05343e-21	-7.72301e-06	1.34757e-21	-1.18414e-05	-3.36371e-05	-1.46597e-21
ARNT	1.05343e-21	3.1773e-22	8.83199e-05	4.03135e-21	-2.27911e-21	-1.46597e-21
ARNT2	1.05343e-21	3.1773e-22	1.34757e-21	0.000279283	-2.27911e-21	-1.46597e-21
ARPC1A	-0.0381431	-0.0661752	-0.0497307	-0.0480104	-0.0408096	-0.037315
ARPC1B	0.0335299	0.00482123	0.0626308	0.0290272	0.0234931	0.0479334
ARPC2	0.111682	-0.0305747	0.248887	0.0381928	-0.0242001	0.119583
ARPC3	-0.00152798	0.0179748	0.0260533	0.0854349	0.0613573	0.0242296
ARPC4	0.554532	-0.0744006	-0.233231	0.135539	0.143957	0.159561
ARPC5	0.0127776	0.0598985	0.216792	0.122477	0.02809	0.115735
ARPC5L	0.00295009	0.0209432	0.0801497	0.0826976	-0.0321289	0.135341
ARPP19	0.0676277	0.038515	0.149341	0.0705961	0.0465207	0.0768462
ARPP21	1.05343e-21	3.1773e-22	1.34757e-21	4.03135e-21	-2.27911e-21	-1.46597e-21
ARRB1	0.0110237	-4.69732e-05	0.00639073	0.0088628	0.00889682	0.00563691
ARRB2	0.000144952	0.00048048	0.00142941	0.00126879	0.00380468	0.000675536
ARRDC1	-0.000658489	3.1773e-22	-0.000264249	-5.1883e-05	-0.000372624	-0.000215378
ARSA	0.0350772	0.000914202	0.0279707	0.0244185	0.0207432	0.00960786
ARSB	4.03707e-05	0.000129735	-3.22245e-05	0.00430704	0.00172145	0.00414945
ARSD	0.0014877	-0.000342332	0.000153851	0.000545484	0.000572999	0.000459076
ARSF	-0.000293562	3.1773e-22	-0.000149826	-4.81902e-05	-7.87952e-05	-5.20102e-05
ART5	0.000706229	0.000682975	0.00688004	0.000918268	0.00168064	0.00251275
ARVCF	1.05343e-21	7.91602e-06	1.34757e-21	6.96904e-06	3.76192e-05	-1.46597e-21
AS3MT	0.00285348	3.1773e-22	1.34757e-21	4.03135e-21	-2.27911e-21	0.000426681
ASAH1	-0.00693275	0.098051	0.0540313	0.0764052	0.0337962	0.0264611
ASAP1	1.05343e-21	3.1773e-22	0.000345582	0.000318559	0.000158417	0.000422061
ASAP2	-0.00053528	-0.000757471	0.000247014	0.000493907	5.50877e-06	0.00169379
ASB15	5.98125e-06	-1.56186e-05	0.00018823	-0.000120022	-6.58632e-06	-0.000166619
ASB6	1.05343e-21	3.1773e-22	1.34757e-21	0.000421213	0.000648203	-1.46597e-21
ASB7	1.05343e-21	3.1773e-22	1.34757e-21	9.79028e-06	-2.27911e-21	-1.46597e-21
ASB8	-0.00032373	3.1773e-22	1.34757e-21	4.03135e-21	-2.27911e-21	-1.46597e-21
ASB9	1.05343e-21	3.1773e-22	1.34757e-21	4.03135e-21	-7.58774e-05	0.000138384
ASCC1	0.000555045	-0.00186962	0.000636312	0.000884073	0.00140593	2.78045e-05
ASCC2	0.00512602	-0.00112019	0.00914154	0.000328539	-6.8043e-05	0.000896755
ASCC3	0.00835442	0.00498485	0.0169872	0.00620856	0.00887059	0.00348779
ASF1A	0.00565409	0.00686948	0.0120609	0.0298345	0.0255005	0.00174698
ASF1B	1.05343e-21	3.1773e-22	1.34757e-21	4.03135e-21	4.07738e-05	-1.46597e-21
ASH1L	-1.77189e-05	3.1773e-22	1.34757e-21	4.03135e-21	-2.58053e-05	-1.46597e-21
ASH2L	0.00622974	0.00550249	0.00328804	0.00559902	0.00524507	0.000433705
ASL	0.0784601	-0.00431001	-0.00975479	-0.00238082	0.000109073	-0.00204242
ASMTL	0.00633439	-0.000476956	-0.00149375	0.00281187	0.000608478	0.0029572
ASNA1	0.0734617	0.00421563	0.0683714	0.0856146	0.16408	0.106223
ASNS	0.0143504	0.0212068	0.0256782	0.017608	0.0102911	0.0050252
ASPA	0.000443177	-0.000198533	0.000449644	0.000159621	6.34976e-05	-9.07111e-05
ASPDH	1.05343e-21	3.1773e-22	-8.55986e-05	7.83955e-07	-2.4295e-05	-1.46597e-21
ASPG	-0.00343445	-0.00357199	-0.00364094	-0.00411448	-0.00318062	-0.00121995
ASPH	0.0720843	0.0164048	0.215338	0.116471	0.143862	0.0261735
ASPHD2	1.05343e-21	3.1773e-22	-0.000616644	-0.000247782	-2.27911e-21	-1.46597e-21
ASPM	-2.94184e-06	3.1773e-22	1.34757e-21	2.60597e-06	-2.27911e-21	-1.46597e-21
ASPN	0.0491442	0.0158745	0.0264601	0.0688072	0.0983877	0.0448869
ASPRV1	1.05343e-21	-0.000123659	1.34757e-21	4.03135e-21	-2.27911e-21	-1.46597e-21
ASPSCR1	0.0102149	0.000389187	0.00801106	0.00994959	0.00970181	0.00502659
ASS1	0.157804	0.0220323	0.0602604	0.0844677	0.210709	0.00465296
ASTL	1.05343e-21	-7.86751e-05	-0.000308021	-0.00021384	-2.27911e-21	-1.46597e-21
ASTN1	1.05343e-21	0.00098942	0.000685594	0.00579503	-0.00108006	-1.46597e-21
ASTN2	1.05343e-21	3.1773e-22	1.34757e-21	4.03135e-21	-0.000108576	-1.46597e-21
ASUN	0.000432148	0.00165208	0.00785695	0.00358112	0.0012926	0.0008404
ASXL2	1.05343e-21	4.65059e-06	-4.98533e-06	6.71011e-05	6.60041e-07	1.49167e-05
ASXL3	1.05343e-21	3.1773e-22	1.34757e-21	2.72986e-05	-2.27911e-21	-1.46597e-21
ATAD1	0.00216959	-0.000642026	0.0168349	0.0100817	0.00301833	0.00294732
ATAD2	1.05343e-21	3.1773e-22	1.34757e-21	3.58966e-07	0.000409024	-1.46597e-21
ATAD2B	-4.73253e-06	1.51051e-06	1.34757e-21	0.000737339	-2.27911e-21	-1.46597e-21
ATAD3A	0.0318595	0.00698967	0.0170289	0.0398387	0.0252433	0.00919097
ATAD3B	1.05343e-21	3.1773e-22	1.34757e-21	-1.46305e-05	-2.27911e-21	-1.46597e-21
ATAT1	1.05343e-21	3.1773e-22	1.34757e-21	1.66367e-05	-2.27911e-21	-1.46597e-21
ATE1	0.0460092	0.00122602	-0.00515102	0.131469	0.0348719	0.00683835
ATF2	1.05343e-21	3.1773e-22	1.34757e-21	4.03135e-21	-2.27911e-21	-2.37866e-05
ATF6	0.00180679	3.1773e-22	1.34757e-21	0.00111776	0.000241026	-1.46597e-21
ATF7	1.05343e-21	7.16124e-05	1.34757e-21	2.60614e-05	-2.27911e-21	-1.46597e-21
ATF7IP	1.05343e-21	2.0586e-06	0.000157391	0.000326896	0.000126247	0.000303423
ATG12	1.05343e-21	3.1773e-22	1.03201e-05	4.03135e-21	4.69048e-05	-1.46597e-21
ATG13	1.05343e-21	-3.89901e-06	-1.88053e-05	9.85664e-05	-3.04528e-05	-1.46597e-21
ATG16L1	0.000659024	0.000163769	0.000945404	3.63671e-05	0.000196509	7.42165e-05
ATG16L2	1.05343e-21	3.1773e-22	1.34757e-21	2.24401e-05	-2.27911e-21	-1.46597e-21
ATG2A	7.23622e-05	0.00017521	-0.000104692	0.000229131	-4.60827e-06	0.000167888
ATG2B	-9.70242e-06	0.000123429	5.90582e-06	8.54638e-06	-1.85317e-05	2.9509e-06
ATG3	0.0798059	0.0627684	0.0840712	0.0586144	0.0772901	0.0505337
ATG4B	0.0101986	-0.00168394	-0.00352285	0.00939126	0.0570104	0.00169885
ATG4C	1.05343e-21	3.1773e-22	1.34757e-21	4.03135e-21	5.18233e-05	1.21396e-05
ATG4D	1.05343e-21	3.1773e-22	1.34757e-21	4.03135e-21	-2.27911e-21	0.000275269
ATG5	0.00152481	0.000234838	0.00113553	0.00432209	-0.000249857	0.000259656
ATG7	0.000366734	-0.00739897	0.0187414	0.00618581	0.000711026	0.0104362
ATG9A	0.000835583	-0.000288784	0.000420877	0.000118124	-0.000223277	-0.000267421
ATHL1	1.05343e-21	3.1773e-22	1.34757e-21	0.000150287	0.000267599	0.000504017
ATIC	0.326194	0.0435064	0.167996	0.178504	0.191673	0.0802303
ATL1	0.00031403	3.1773e-22	6.26845e-06	4.06097e-05	0.000126646	-3.14183e-06
ATL2	0.00319552	-0.00280613	0.0120246	0.00188258	-0.000741093	2.09586e-05
ATL3	0.0406516	0.0296052	0.0282136	0.0582256	0.0201441	0.0575571
ATM	-0.00107606	6.11804e-05	0.000787174	0.00164509	0.000770239	0.0010434
ATMIN	1.05343e-21	-5.5269e-05	-0.000112544	-1.03257e-05	-5.81579e-05	-1.46597e-21
ATN1	1.05343e-21	3.1773e-22	-2.24005e-05	4.03135e-21	-2.27911e-21	-1.46597e-21
ATOH8	3.37173e-05	3.1773e-22	1.34757e-21	3.5825e-05	7.11016e-06	0.000203638
ATOX1	0.00295372	-0.0021127	-0.0193615	0.000628888	-0.00212655	-0.000141855
ATP10A	1.05343e-21	-5.64003e-05	0.00106001	1.20001e-05	-2.27911e-21	0.000101562
ATP10B	2.48673e-05	3.1773e-22	1.34757e-21	4.03135e-21	-2.27911e-21	-1.46597e-21
ATP10D	1.05343e-21	3.1773e-22	1.34757e-21	4.03135e-21	6.03102e-05	-1.46597e-21
ATP11A	3.86544e-05	3.1773e-22	1.34757e-21	4.03135e-21	-2.27911e-21	-1.46597e-21
ATP11B	-0.00151393	-0.000128411	-5.5729e-05	-0.000917027	-0.00111908	-0.000238095
ATP11C	1.05343e-21	3.1773e-22	1.34757e-21	0.000226116	-2.27911e-21	-2.14531e-05
ATP12A	-6.536e-05	0.000174503	1.34757e-21	-8.1974e-06	-2.27911e-21	-1.46597e-21
ATP13A1	0.042234	-0.00505868	0.0462398	0.037555	0.0797569	0.0867556
ATP13A2	1.05343e-21	3.1773e-22	1.34757e-21	-1.84754e-06	-2.27911e-21	-1.46597e-21
ATP13A3	1.05343e-21	3.1773e-22	1.34757e-21	4.03135e-21	-2.27911e-21	-1.46597e-21
ATP13A4	1.05343e-21	3.1773e-22	-5.81868e-05	-1.09687e-06	-3.67425e-05	-1.46597e-21
ATP13A5	1.05343e-21	-0.000101609	0.000578118	0.000652011	0.00080099	0.000573291
ATP1A1	0.67612	0.135274	0.285951	0.514545	0.27722	0.0294289
ATP1A2	0.0167019	3.1773e-22	-0.000699153	-0.000411083	-2.27911e-21	-0.00177801
ATP1A3	1.05343e-21	-0.00815209	0.057302	0.00390282	0.0012672	0.00423613
ATP1B1	0.114377	0.0742825	0.100397	0.103624	0.0665578	0.0119442
ATP1B3	0.488752	0.0512006	0.0862492	0.225427	0.189375	0.0205214
ATP2A1	1.05343e-21	0.0163245	0.0374463	0.00784816	0.000120383	0.00354247
ATP2A2	-0.00373796	-0.187688	-0.00624614	-0.0883235	-0.091754	-0.0780437
ATP2A3	0.0293093	0.0230567	0.0482821	0.0415847	0.0527871	0.0440766
ATP2B1	0.0343401	0.00224882	0.0153775	0.0121183	0.0167707	0.00499936
ATP2B4	0.045387	0.01637	0.018841	0.0202622	0.0124326	0.0117343
ATP2C1	0.00115128	0.00140744	0.0101419	0.00614539	0.00354493	0.00237906
ATP2C2	0.000774554	3.1773e-22	0.000185121	0.000124711	0.000323652	-2.90849e-05
ATP5A1	5.74557	0.223001	-0.68083	2.37496	5.4892	-1.95164
ATP5B	5.26105	1.20746	1.55872	4.11754	4.36604	0.178099
ATP5C1	0.259007	0.0898718	0.0322653	0.156592	0.415141	0.00262569
ATP5D	0.0418228	-0.0324919	0.0134766	0.110173	0.164924	0.000929624
ATP5E	-0.00111298	0.000123075	-1.58925e-05	-0.000925672	0.00433374	-9.42711e-05
ATP5F1	0.142013	0.0228245	0.101125	0.166536	0.148524	0.0430392
ATP5H	0.402137	0.332687	0.0862471	0.734381	0.722811	0.31929
ATP5I	0.0508156	-0.0448528	0.0681415	0.551852	0.0877528	0.254945
ATP5J	0.128604	0.0746291	0.0897552	0.145771	0.11137	0.0821342
ATP5J2	1.05343e-21	3.1773e-22	1.34757e-21	4.03135e-21	-2.27911e-21	-1.46597e-21
ATP5L	1.05547	-0.192554	0.0274567	0.359936	0.709566	-0.0998697
ATP5O	0.265366	0.0715316	0.0260688	0.424353	0.294855	0.116311
ATP5S	0.00629573	-0.000496706	-0.00212619	0.000874968	0.00762626	0.00112013
ATP6	0.00577281	0.0101333	0.0240592	0.0238442	0.00471415	0.00342544
ATP6AP1	-0.0138757	-0.00462481	-0.00860507	0.0036477	0.00385569	0.000208744
ATP6AP2	0.0124956	0.00452048	0.00658306	0.00890861	0.00315645	0.003237
ATP6V0A1	0.00354641	-0.00462803	0.0037675	-0.00122586	-0.00694857	0.00624005
ATP6V0A2	-0.000336777	3.1773e-22	1.34757e-21	4.03135e-21	-2.27911e-21	-1.46597e-21
ATP6V0A4	1.05343e-21	3.1773e-22	1.34757e-21	-1.7768e-05	0.00045014	-1.46597e-21
ATP6V0C	1.05343e-21	0.0176619	1.34757e-21	0.0226134	0.00445581	0.00542231
ATP6V0D1	-0.0234319	-0.0189764	0.00379045	-0.0277766	0.0110245	0.0129864
ATP6V0D2	1.05343e-21	3.1773e-22	1.34757e-21	4.03135e-21	2.1117e-05	-1.46597e-21
ATP6V1A	0.0520771	0.00209238	0.0904242	0.0807649	0.0812333	0.0785742
ATP6V1B1	0.0158295	3.1773e-22	1.34757e-21	0.00587548	-2.27911e-21	0.00144383
ATP6V1B2	0.010317	-0.0835643	-0.111551	-0.0631997	-0.0416318	0.0108668
ATP6V1C1	0.066774	0.000629339	0.0324229	0.054949	0.0893778	0.0211282
ATP6V1C2	1.05343e-21	0.000877624	-5.77543e-05	0.000293364	-2.24701e-05	-1.46597e-21
ATP6V1D	-0.0199276	-0.0206151	-0.0171289	0.00585374	-0.00999795	0.0197653
ATP6V1E1	-0.007681	0.00164015	0.00953981	0.119472	0.0903458	-0.0233964
ATP6V1F	0.00278135	-0.0912993	-0.0635256	0.0366668	0.0419105	-0.100699
ATP6V1G1	0.0113891	0.0471557	0.104478	0.0755899	0.0124267	0.0653671
ATP6V1H	-0.0158519	-0.0118678	0.00166276	8.42449e-05	0.00437837	-0.000477621
ATP7A	2.94422e-06	3.1773e-22	3.55014e-05	-4.75366e-06	2.55516e-05	-5.21311e-06
ATP8A1	0.000141653	4.55938e-05	0.000266248	1.42e-05	3.49692e-05	-1.46597e-21
ATP8B1	0.000283068	-2.8952e-05	-0.00016089	3.94918e-06	-0.00016306	-1.46597e-21
ATP8B4	1.05343e-21	3.1773e-22	1.34757e-21	4.60497e-06	4.92851e-05	-1.46597e-21
ATP9A	0.00275656	1.14773e-05	0.00104563	0.00123067	0.00165705	4.09451e-05
ATP9B	1.05343e-21	-3.58232e-05	1.34757e-21	4.03135e-21	-2.27911e-21	6.07578e-05
ATPAF1	0.00452243	0.00209062	0.00612068	0.00270086	0.0017305	-0.000752213
ATPAF2	0.0167193	0.00115411	0.0106073	0.00826118	0.0142776	0.00346449
ATPIF1	-3.79459e-05	3.1773e-22	1.59496e-05	4.03135e-21	-1.15431e-05	-1.46597e-21
ATR	0.000282764	-0.000103289	-0.00028635	2.80182e-07	-0.000293575	-0.000135968
ATRIP	1.05343e-21	3.1773e-22	0.00134435	-2.28756e-05	-3.37445e-05	-1.46597e-21
ATRN	1.91026e-05	3.1773e-22	-1.07421e-05	0.000115287	3.40705e-05	1.36026e-05
ATRX	1.05343e-21	0.000227258	0.000348398	0.000754439	-2.41876e-05	-1.46597e-21
ATXN1	-8.94778e-05	3.1773e-22	1.34757e-21	4.03135e-21	-2.27911e-21	-1.46597e-21
ATXN10	0.0401253	0.000673402	0.0468825	0.0160665	0.0010066	-0.00345698
ATXN1L	1.05343e-21	3.1773e-22	1.34757e-21	7.49001e-06	-2.27911e-21	-1.46597e-21
ATXN2	8.49434e-05	-0.000145653	0.00163569	0.001215	0.000431301	0.000111225
ATXN2L	0.0224743	-0.000185939	0.0225059	0.0229963	0.0157089	0.00765329
ATXN3	0.0061196	-0.00118489	0.00836438	0.00660449	0.00225086	0.00200446
ATXN7	1.05343e-21	3.1773e-22	-6.86545e-06	4.03135e-21	-2.27911e-21	-1.46597e-21
ATXN7L1	-0.00368576	3.1773e-22	1.34757e-21	4.03135e-21	-2.27911e-21	-1.46597e-21
ATXN7L3	1.05343e-21	3.1773e-22	-7.93023e-06	4.03135e-21	2.69064e-06	-2.16066e-06
ATXN7L3B	1.05343e-21	3.1773e-22	1.34757e-21	0.00384142	1.62866e-05	-1.46597e-21
AUH	0.000932905	-0.000283758	0.0014842	9.10186e-05	-2.87918e-06	0.000726628
AUNIP	1.05343e-21	3.1773e-22	1.34757e-21	4.73036e-05	-1.33774e-05	-1.46597e-21
AUP1	0.0105504	0.00200211	0.0033715	0.00716091	0.00549356	0.00513522
AURKB	1.05343e-21	3.1773e-22	0.000400828	-2.00732e-06	-2.27911e-21	-1.46597e-21
AUTS2	1.05343e-21	3.1773e-22	1.34757e-21	1.26465e-05	-2.27911e-21	1.11621e-05
AVEN	-0.000326928	3.1773e-22	-0.000130911	9.01332e-05	-1.98956e-06	-1.46597e-21
AVL9	-1.61073e-05	0.000547188	-5.6243e-06	3.55992e-05	-0.000148097	0.000760392
AXDND1	1.05343e-21	3.1773e-22	1.34757e-21	3.32889e-05	-2.27911e-21	-1.46597e-21
AXL	0.000157318	3.1773e-22	1.34757e-21	4.03135e-21	-2.27911e-21	-1.46597e-21
AZGP1	-0.24821	0.024472	0.00331102	0.0182221	0.00776884	0.0133022
AZI1	1.05343e-21	3.81074e-05	1.34757e-21	8.22115e-05	-2.27911e-21	0.000294914
AZI2	-4.00531e-05	3.1773e-22	0.000833914	4.03135e-21	-2.27911e-21	-1.46597e-21
AZU1	0.0816712	0.277472	0.190855	0.157657	0.129495	0.058804
B2M	0.015911	0.0366462	-0.000842527	0.0193787	0.0557202	0.0453508
B3GALT6	-1.4965e-05	6.32054e-06	1.34757e-21	5.27297e-06	-2.27911e-21	1.86085e-05
B3GALTL	1.05343e-21	3.1773e-22	1.34757e-21	4.03135e-21	-2.27911e-21	-1.46597e-21
B3GAT3	1.05343e-21	3.1773e-22	1.34757e-21	-2.79938e-05	0.000313587	0.000343757
B3GNT1	1.05343e-21	-8.69724e-05	1.34757e-21	6.03812e-05	-5.83279e-05	-1.46597e-21
B3GNT3	1.05343e-21	3.1773e-22	-8.40768e-05	-0.000105401	-2.27911e-21	-1.46597e-21
B3GNT4	1.05343e-21	3.1773e-22	1.34757e-21	4.03135e-21	-0.000203175	-1.46597e-21
B3GNT6	1.05343e-21	3.1773e-22	1.34757e-21	0.000108041	-2.27911e-21	-1.46597e-21
B4GALNT3	1.05343e-21	3.1773e-22	1.34757e-21	-0.000132263	-2.27911e-21	-1.46597e-21
B4GALT1	-0.0006681	-0.00531191	0.0105574	0.000361268	0.000679511	0.0020553
B4GALT3	9.9862e-06	3.1773e-22	-0.000134025	4.03135e-21	-2.27911e-21	-1.46597e-21
B4GALT4	1.05343e-21	3.1773e-22	1.34757e-21	6.02075e-05	-2.27911e-21	-1.46597e-21
B4GALT6	1.05343e-21	3.1773e-22	1.34757e-21	4.03135e-21	-2.27911e-21	6.11327e-05
B4GALT7	-2.65271e-06	-7.98845e-05	-0.000192213	0.00022904	8.41658e-05	0.000287235
BABAM1	0.00154628	0.00126574	0.012135	0.00471282	0.0124172	0.006208
BACE2	2.68698e-05	3.1773e-22	1.34757e-21	-1.21338e-05	-2.27911e-21	0.000282266
BAD	1.05343e-21	3.1773e-22	0.000503086	4.03135e-21	-2.27911e-21	-1.46597e-21
BAG1	-0.000265108	-0.000882617	0.0181314	0.0100723	-0.0135346	-0.0105975
BAG2	0.107451	0.0229886	0.0310667	0.033262	0.066905	0.0368125
BAG3	-0.00445352	-0.0518576	-0.0554176	-0.00848089	0.00279278	-0.040582
BAG4	-0.00124056	3.1773e-22	1.34757e-21	-0.000555868	-2.27911e-21	-1.46597e-21
BAG5	-0.000573267	0.0151865	0.0355791	0.00938668	0.0517434	-0.0140403
BAG6	0.0072638	0.00217707	0.0212025	0.0166925	0.010153	0.0131319
BAI1	1.05343e-21	3.1773e-22	1.34757e-21	-2.82734e-06	-2.27911e-21	-1.46597e-21
BAI2	0.000104441	3.1773e-22	1.34757e-21	-1.77569e-05	-2.27911e-21	-1.46597e-21
BAIAP2	-0.0126232	-0.0447292	-0.0757639	-0.0212283	-0.0406208	-0.0508028
BAIAP2L1	0.00170758	0.000194529	0.00238044	0.00292226	-0.000357752	-0.000134533
BAIAP2L2	0.0114086	0.0350268	0.0194141	0.00426349	-5.89777e-05	0.00751065
BAIAP3	1.05343e-21	3.1773e-22	-2.12631e-05	4.03135e-21	-2.27911e-21	-1.46597e-21
BAK1	0.001521	-0.00290618	0.0158245	0.0101748	0.00151758	0.00331081
BANF1	0.220325	0.380117	0.589755	1.04172	0.593933	0.442884
BANK1	1.05343e-21	3.1773e-22	-2.26533e-05	0.000116925	0.0007732	0.000149989
BASP1	0.0794813	-0.0157445	0.10674	0.0438461	0.0281577	0.00679829
BAX	0.191391	0.164211	0.143353	0.247973	0.23553	0.145857
BAZ1A	0.0048204	0.00167832	0.00352214	0.00154369	0.00158315	0.000265914
BAZ1B	0.00631353	0.00599186	0.00837084	0.0105341	0.00973687	0.00450299
BAZ2A	5.99969e-05	-6.74564e-05	7.82799e-05	0.000209159	9.15503e-05	2.10825e-06
BBC3	1.05343e-21	3.1773e-22	1.34757e-21	8.90208e-05	-2.27911e-21	-1.46597e-21
BBIP1	0.00160847	3.1773e-22	1.34757e-21	4.03135e-21	-2.27911e-21	-1.46597e-21
BBOX1	-0.00323319	-0.000744651	-0.00113562	-0.00169527	-0.0023222	-0.00112061
BBS1	1.05343e-21	3.1773e-22	1.34757e-21	4.03135e-21	-2.00363e-05	-1.46597e-21
BBS7	-0.000146548	0.000653537	-0.000569318	-0.000889257	-0.000290952	0.000143413
BBX	1.05343e-21	8.31489e-05	-7.86676e-05	0.00062979	-2.27911e-21	-1.46597e-21
BCAM	0.142074	0.0684039	0.0733092	0.180842	0.0336681	0.137182
BCAP29	-3.65211e-05	9.70566e-05	1.34757e-21	0.000798094	0.0116188	0.000522742
BCAP31	0.075694	0.0456782	0.161646	0.129073	0.656842	0.132804
BCAR1	0.00306688	0.000276525	0.000899122	0.000571835	0.00185878	0.00118359
BCAR3	1.05343e-21	7.75395e-06	-7.78041e-05	1.12628e-07	0.000426959	0.00056608
BCAS1	1.05343e-21	0.00160474	1.34757e-21	4.03135e-21	0.000202727	-1.46597e-21
BCAS2	0.0425219	0.00417713	0.0415646	0.0398798	0.0326465	0.0166693
BCAS3	-0.000201115	1.25939e-05	0.00020562	-6.03895e-05	-0.000113195	8.64905e-05
BCAS4	-5.28502e-05	3.1773e-22	1.34757e-21	4.03135e-21	-2.27911e-21	-1.46597e-21
BCAT1	0.000359438	-0.00144363	-8.68189e-05	0.000682355	-0.00102574	-0.000338762
BCAT2	0.00188558	0.0027103	0.0184073	0.0294383	0.0509473	0.0568229
BCCIP	0.024078	0.0169303	0.0439476	0.0459614	0.0391336	0.0221445
BCHE	7.70138e-05	3.1773e-22	0.000299834	0.000396013	-5.50574e-05	0.000570448
BCKDHA	0.0120372	-0.000730546	0.00339947	0.0155681	0.00735021	0.00108984
BCKDHB	0.000335058	0.00106658	-0.000366208	0.00282922	0.00193067	0.000135127
BCKDK	0.00134539	0.00494403	0.00291642	0.00252924	0.0034587	0.00174162
BCL10	0.0154303	-0.0180195	-0.0110442	-0.00943095	-0.00107957	-0.00630518
BCL11A	0.00026899	3.1773e-22	0.000321997	9.29061e-05	0.000186112	2.45412e-05
BCL11B	1.05343e-21	3.1773e-22	1.34757e-21	2.34737e-05	-3.55732e-05	-1.46597e-21
BCL2	4.53716e-05	2.14923e-05	0.00023058	0.00021016	0.000310963	0.000309171
BCL2A1	1.05343e-21	3.1773e-22	1.34757e-21	4.03135e-21	9.3918e-06	-1.46597e-21
BCL2L1	0.01254	0.00686508	0.00397909	0.010207	0.0139288	-6.72674e-05
BCL2L11	1.05343e-21	3.1773e-22	1.34757e-21	0.00368807	-2.27911e-21	0.00269023
BCL2L12	1.05343e-21	3.1773e-22	1.34757e-21	4.03135e-21	-7.1253e-06	-1.46597e-21
BCL2L13	0.0479016	0.015185	0.0608588	0.0630643	0.0200136	0.0273994
BCL2L15	1.05343e-21	3.1773e-22	1.34757e-21	4.03135e-21	-2.27911e-21	-3.3132e-05
BCL3	0.000291678	0.000233689	0.000526775	0.000807985	7.26729e-05	-3.14565e-05
BCL7C	0.00185178	-0.000183865	0.00624259	-9.29189e-05	0.00318553	0.00457039
BCL9L	0.00114838	0.000325254	0.00604187	0.0189931	0.0255712	0.0307508
BCLAF1	0.0281604	0.0188421	0.0495969	0.0710845	0.0624938	0.0589216
BCMO1	1.05343e-21	-2.19732e-05	-4.6444e-06	4.03135e-21	9.2526e-06	-1.46597e-21
BCR	0.000835924	0.000681918	-0.00149144	0.000467872	-0.000346763	-0.000403994
BCS1L	0.0195223	-0.00490708	0.00382144	0.00918448	-0.0114343	0.0100499
BDH1	0.00965696	-0.0119231	0.0644306	0.0211317	0.0468776	-0.00646855
BDH2	0.0334403	-0.00273782	0.00690693	0.00141626	-0.012223	-0.0140205
BECN1	1.05343e-21	0.00110366	0.000713434	0.000704449	0.000501449	0.000124357
BEND3	1.05343e-21	3.1773e-22	-0.000425753	-0.000240891	-0.00152192	0.0275326
BEST3	1.05343e-21	3.1773e-22	1.34757e-21	4.03135e-21	1.48149e-05	-1.46597e-21
BET1	0.00275092	-0.000426505	0.0224796	0.0111817	0.00696842	0.00885644
BET1L	0.00811763	0.0108183	0.0329005	0.0167373	0.0119342	0.0129768
BEX5	1.05343e-21	3.1773e-22	1.34757e-21	0.0062835	-0.00171994	-1.46597e-21
BFSP1	-0.00830837	-0.00500846	-0.00741688	-0.00470949	-0.00753677	-0.00420455
BFSP2	0.0374135	0.0483629	-0.0943788	0.0764174	-0.0768391	-0.125608
BGN	2.43494	1.21466	0.543624	1.39422	2.03714	1.85371
BHLHE40	-0.000263311	-0.00627203	-0.000206721	0.000855971	-1.97374e-05	-1.46597e-21
BHLHE41	-0.00395153	0.00679755	0.00118342	0.0370528	0.00770432	-0.000193304
BHMT	1.05343e-21	3.1773e-22	1.34757e-21	4.03135e-21	-0.000630881	-0.00215513
BHMT2	1.05343e-21	-4.57527e-05	1.34757e-21	0.000111566	-2.27911e-21	-1.46597e-21
BICD1	1.05343e-21	3.1773e-22	1.34757e-21	1.65113e-06	-2.27911e-21	-1.46597e-21
BICD2	0.0123945	-0.00259819	0.030261	0.00658153	-0.00691463	-0.00245186
BID	0.105719	0.101642	0.185737	0.199019	0.146392	0.176104
BIN1	0.00712061	0.00482041	0.00523991	0.0146658	0.00673248	0.030708
BIN2	0.000591068	0.000183	0.00602931	0.00515765	0.00204526	0.00401626
BIN3	0.000384429	-0.00145388	-0.00116435	0.00115062	-0.000301007	-0.000876805
BIRC6	0.000176213	-2.29676e-05	0.000535052	0.000644851	0.000462484	5.80029e-05
BIRC7	1.05343e-21	3.1773e-22	1.34757e-21	-0.000157865	-2.27911e-21	-1.46597e-21
BLK	1.05343e-21	3.1773e-22	1.34757e-21	4.03135e-21	-2.27911e-21	0.000780884
BLMH	0.0969915	0.0539906	0.0559833	0.0736533	0.0428035	0.0228861
BLNK	1.05343e-21	3.1773e-22	1.47339e-05	4.03135e-21	-0.000112489	-1.46597e-21
BLOC1S1	0.00586431	0.00381218	0.0288046	0.0135451	0.0135607	0.0233315
BLOC1S2	0.00441283	-6.36077e-05	0.0155589	0.00704313	0.0135743	0.00223375
BLOC1S3	0.00215608	-0.000190863	0.00706894	0.00662585	0.00388143	0.00602582
BLOC1S4	1.05343e-21	3.1773e-22	1.34757e-21	9.89303e-05	-2.27911e-21	0.000190793
BLOC1S5	0.000163737	3.1773e-22	1.34757e-21	4.03135e-21	0.000186686	-1.46597e-21
BLOC1S6	0.00221965	0.00761725	0.0156629	0.0172076	0.014351	0.0156444
BLVRA	-0.241129	0.0531584	0.0829396	-0.11272	-0.0630857	0.0922316
BLVRB	2.57036	-0.231341	0.995935	0.29283	3.0869	0.157087
BLZF1	1.05343e-21	3.1773e-22	-6.15763e-06	-7.00788e-05	-0.000318303	-8.70304e-05
BMP1	1.05343e-21	3.1773e-22	1.34757e-21	0.000324862	-2.27911e-21	-1.46597e-21
BMP2K	8.62236e-05	-5.65833e-05	-3.17313e-06	0.000582144	-0.00220437	0.000303219
BMP7	1.05343e-21	3.1773e-22	1.34757e-21	0.000129205	-2.27911e-21	-1.46597e-21
BMPR2	0.000309572	1.84634e-05	-2.07576e-05	-4.38238e-05	0.000131925	-9.22918e-05
BMS1	0.00339866	0.00167599	0.00563452	0.00540263	0.00270528	0.00475135
BNC1	0.00017134	3.1773e-22	1.29986e-05	2.94874e-05	-4.85899e-06	-1.46597e-21
BNIP1	0.00015647	-0.000904616	0.0460116	0.00174451	0.000568314	0.00176638
BNIP2	0.000251149	0.000174406	0.00169913	0.000667812	0.00028075	0.000879114
BNIP3L	1.05343e-21	3.1773e-22	1.34757e-21	0.000377146	-2.27911e-21	-1.46597e-21
BNIPL	-0.0351264	-0.0308892	-0.0363349	-0.0421734	-0.032694	-0.030097
BOD1	0.00041125	0.00128015	1.34757e-21	0.000390596	-2.27911e-21	-1.46597e-21
BOD1L1	0.000317787	3.42435e-06	2.35459e-05	0.000462335	0.000187685	4.76536e-05
BOK	1.05343e-21	3.1773e-22	1.34757e-21	-1.46887e-05	-2.27911e-21	-1.46597e-21
BOLA1	0.0168105	0.01763	0.00706674	0.00598189	0.0251127	-0.00147335
BOLL	1.05343e-21	3.1773e-22	1.34757e-21	4.03135e-21	-2.27911e-21	-1.46597e-21
BOP1	0.0178553	0.0342019	0.0164155	0.0173056	0.0137082	0.0161141
BPGM	0.038923	0.0118314	0.0209244	0.0147837	0.0264491	0.0152513
BPHL	0.0347119	-0.00643722	0.0125686	0.0186218	0.0929375	0.0130842
BPI	0.166715	0.0230538	0.0338362	0.0279323	0.0724372	0.0149756
BPIFA1	-0.0135996	3.1773e-22	-0.00496496	0.0169087	-0.00120728	0.000104273
BPIFA2	-0.000150084	0.000856629	-0.00062953	-8.41517e-05	0.000712541	0.000316977
BPIFB1	-0.00876082	-0.0500216	-0.00882379	-0.00626197	0.00662223	-0.0129262
BPIFB2	-0.0141879	-0.0065719	-0.0100231	0.012656	-0.00436282	-0.0146355
BPNT1	0.00569905	0.00907904	0.00900484	0.0299112	0.0208157	0.0138627
BPTF	0.000104343	8.65879e-05	9.97369e-05	0.00099951	0.000142638	0.000263872
BRAF	1.05343e-21	-5.20885e-05	1.34757e-21	-1.67543e-05	-4.20068e-05	-0.00017084
BRAP	1.53654e-05	-0.000399131	0.000727321	0.00199499	0.000341654	3.28098e-05
BRAT1	0.00212275	0.0015877	0.00101861	0.00174332	0.00284267	0.000814165
BRCA2	-3.51302e-05	-7.48489e-06	8.25325e-06	0.00030297	-9.3803e-06	-1.46597e-21
BRCC3	-0.000594464	0.000111572	-0.000555919	0.00455181	0.0061088	0.000751821
BRD1	3.43847e-05	-9.66097e-07	1.34757e-21	0.000131939	5.56467e-05	1.04967e-05
BRD2	0.00142539	3.47208e-05	0.000762479	0.00184815	0.00175268	0.000440863
BRD3	0.00283565	0.00241111	0.0111529	0.00792763	0.00442711	0.00394998
BRD4	0.00783312	0.000915411	0.00173583	0.00421831	0.0075999	0.00164216
BRD7	9.00406e-05	2.14162e-05	1.34757e-21	4.03135e-21	-2.27911e-21	-1.46597e-21
BRD8	0.00084505	0.000219252	-6.26953e-05	0.000453326	0.00217594	0.000810399
BRD9	1.05343e-21	3.1773e-22	1.34757e-21	4.03135e-21	-1.88535e-05	-1.06567e-05
BRE	0.00249323	0.0022106	0.00473947	0.00554758	0.00368897	0.00163374
BRF1	0.000386886	3.1773e-22	1.34757e-21	4.03135e-21	-2.27911e-21	-1.46597e-21
BRI3BP	0.0235291	0.000332992	0.00621738	0.0204386	0.0237745	0.0114843
BRIX1	0.0166912	-0.00229131	0.00958724	0.0257693	0.0146098	0.00492267
BRK1	0.0484564	0.0363214	-0.087868	0.0315499	0.0909126	-0.0442271
BRMS1	1.05343e-21	2.54663e-05	0.00021926	0.00015132	-2.27911e-21	0.000152949
BRMS1L	1.05343e-21	3.1773e-22	1.34757e-21	4.03135e-21	-1.59192e-05	-6.80838e-06
BROX	0.00651496	0.000619845	0.0344126	0.0151513	0.0094663	0.0114555
BRPF1	1.05343e-21	5.7069e-06	-3.84322e-06	1.20434e-05	-6.3587e-06	3.01807e-05
BRPF3	2.82405e-06	-8.86591e-05	1.34757e-21	2.92149e-05	-0.000110392	-3.50837e-05
BSCL2	-0.00227699	-7.04727e-05	-0.000844873	0.00302865	0.0118444	-0.000188176
BSDC1	0.000426728	-0.000640838	-0.00119002	0.000801499	0.00122152	0.00128602
BSG	0.0704357	0.0619461	0.0774843	0.102877	0.146561	0.0161927
BSN	1.05343e-21	3.1773e-22	1.34757e-21	-9.57057e-07	-2.27911e-21	-1.46597e-21
BSPRY	-9.4647e-05	-0.000259417	-0.000552064	-0.000156983	-4.72623e-05	-1.24777e-05
BST1	0.00411982	0.0332062	0.0362139	0.0170217	0.00582742	0.00588377
BST2	0.00294561	0.00319418	0.00127145	0.00649197	0.00581975	0.0113893
BTAF1	0.00262675	-0.000802332	0.00302409	0.00391054	0.00178247	0.000569987
BTBD1	1.05343e-21	0.000301975	1.34757e-21	1.40202e-06	-2.27911e-21	-1.46597e-21
BTBD11	-0.000567177	-0.000651283	-0.000451597	-0.00156889	-0.00151914	-0.000779912
BTBD18	-0.0586217	-0.0447384	-0.0020639	-0.00624006	-0.00283558	-0.0017942
BTBD3	-3.0892e-05	3.1773e-22	1.34757e-21	4.03135e-21	-2.27911e-21	-1.46597e-21
BTBD7	1.05343e-21	3.1773e-22	0.00031828	0.000123955	-2.27911e-21	1.7038e-05
BTD	-0.000344822	0.00165649	0.002958	0.00527227	0.00350045	0.00360074
BTF3	0.0106641	-0.06667	-0.0188584	0.142166	0.103587	-0.0381786
BTF3L4	0.119313	0.0131086	0.118391	0.13179	0.163257	0.03765
BTG1	1.05343e-21	3.1773e-22	1.34757e-21	4.03135e-21	-0.000389695	-1.46597e-21
BTK	1.05343e-21	3.1773e-22	1.34757e-21	0.000275206	-2.27911e-21	1.71172e-05
BTN2A1	0.00195316	-0.00164883	-0.00156286	0.00253501	0.00178024	-0.00412164
BTN2A2	1.05343e-21	3.1773e-22	1.34757e-21	4.03135e-21	-2.27911e-21	0.00096163
BTN3A1	1.05343e-21	3.1773e-22	-6.54813e-05	4.03135e-21	-2.27911e-21	0.000837586
BTN3A3	1.05343e-21	3.1773e-22	0.00221737	0.00489433	-0.00219624	0.0111386
BTNL8	1.05343e-21	3.1773e-22	1.34757e-21	-9.7702e-05	-2.27911e-21	-1.46597e-21
BUB1	0.000277508	3.1773e-22	0.000213758	-8.57856e-06	-2.27911e-21	-1.46597e-21
BUB1B	1.05343e-21	3.1773e-22	-6.23219e-05	4.03135e-21	-2.27911e-21	-1.46597e-21
BUB3	0.051486	0.0327335	0.136111	0.151991	0.122715	0.044652
BUD13	1.05343e-21	8.86717e-05	1.34757e-21	0.00010904	-2.27911e-21	-1.46597e-21
BUD31	0.108217	0.0338246	0.0956972	0.103567	0.143906	0.0436528
BYSL	0.0462768	-0.000520564	0.0143892	0.0125579	0.0161813	0.00524647
BZRAP1	-0.000604843	3.1773e-22	-0.000713048	0.000101086	-0.00130098	-0.000721414
BZW1	-0.00967344	-0.0211142	0.00662592	-0.00567621	-0.0130941	-0.00773952
BZW2	0.0678945	-0.00133101	0.0179657	0.0133533	0.0428531	0.00828704
C10orf118	-0.000596751	-0.001751	-0.000113348	-0.000766236	-0.000109055	-0.000200052
C10orf131	1.05343e-21	3.1773e-22	1.34757e-21	1.21754e-05	-2.27911e-21	-1.46597e-21
C10orf2	-0.000165383	3.1773e-22	1.34757e-21	0.000201065	-2.27911e-21	-1.46597e-21
C10orf32	0.000397028	0.000263125	0.0162342	0.0019871	-0.000184746	0.000109841
C10orf35	1.05343e-21	-0.000314453	-0.00023004	0.00623083	0.00351732	-1.46597e-21
C10orf54	1.05343e-21	-8.84226e-05	0.00283391	0.00182534	0.000570977	0.000671338
C10orf68	1.05343e-21	1.6507e-05	1.34757e-21	4.03135e-21	-2.27911e-21	-1.46597e-21
C10orf71	1.05343e-21	3.1773e-22	1.34757e-21	7.13865e-05	3.09239e-06	-1.46597e-21
C10orf76	-0.00023229	-0.00177379	-0.00074821	0.000479934	-0.00023035	0.000721759
C10orf90	1.05343e-21	3.1773e-22	1.34757e-21	4.03135e-21	1.82372e-06	-1.46597e-21
C10orf99	1.05343e-21	-0.000791073	1.34757e-21	0.000165578	-0.0013021	-0.00118845
C11orf21	-8.8918e-05	3.1773e-22	1.34757e-21	-5.69241e-07	-2.27911e-21	-1.46597e-21
C11orf30	1.05343e-21	3.1773e-22	1.34757e-21	0.000491984	-2.27911e-21	-1.46597e-21
C11orf31	0.186132	0.0818285	0.174716	0.236894	0.257697	0.1484
C11orf40	1.05343e-21	3.1773e-22	1.34757e-21	0.000257216	-2.27911e-21	-1.46597e-21
C11orf54	0.00130489	0.00113623	3.09089e-05	0.000480236	0.00118929	0.00201551
C11orf58	0.0305263	0.0315717	0.128864	0.0748955	0.0472509	0.0625492
C11orf68	0.0466012	0.00217862	0.017023	0.0156457	0.0174258	0.00653184
C11orf73	0.00101058	-0.00262628	-0.00224374	-0.00134708	0.00258246	-0.000853339
C11orf83	0.132765	-0.00917702	0.0227546	0.0900403	0.0639202	-0.0337066
C11orf84	6.688e-06	1.68752e-05	0.000350471	0.000977036	0.00029972	0.000270412
C11orf96	1.05343e-21	3.1773e-22	1.34757e-21	4.03135e-21	-2.27911e-21	-1.46597e-21
C12orf10	0.013697	0.0237096	0.0901847	0.0269715	-0.0018109	0.0402161
C12orf23	0.00679118	0.00129848	0.0262215	0.0188505	0.00438132	0.0140387
C12orf28	-0.0016404	3.1773e-22	1.34757e-21	-3.67455e-06	-2.27911e-21	-7.70645e-05
C12orf29	1.05343e-21	-0.000241941	1.34757e-21	-0.000113161	4.13519e-05	-0.000102703
C12orf43	1.05343e-21	0.00011106	0.00181123	0.00056198	0.00148685	0.000114885
C12orf44	0.00226174	0.000980841	-0.00104685	-0.00106927	0.0075391	-0.000164001
C12orf45	1.05343e-21	3.1773e-22	1.34757e-21	0.000404835	-2.27911e-21	-1.46597e-21
C12orf5	0.0606296	-0.0179972	0.0314038	0.0225299	0.0179857	0.016795
C12orf57	0.00154508	0.0214187	0.0881777	0.0800547	0.0261417	0.036265
C12orf75	0.000429064	-3.92764e-05	0.00117605	0.000362143	-2.80533e-05	4.79881e-05
C14orf1	0.0107035	0.000283643	0.000776725	-0.000398752	-0.000631835	-1.46597e-21
C14orf105	1.05343e-21	3.1773e-22	1.34757e-21	-0.000708867	0.0193155	-1.46597e-21
C14orf119	0.000894525	3.1773e-22	0.000304308	0.000320694	-6.62944e-06	-1.46597e-21
C14orf142	0.000518162	-0.000664262	0.00649539	0.00237535	0.00100344	0.00274826
C14orf159	0.0168615	-0.00491254	0.0187297	0.0138513	0.0136616	0.0176343
C14orf166	0.261488	0.0631361	0.094167	0.221015	0.195609	0.063233
C14orf169	0.000205108	9.1924e-05	-0.000263873	0.000710556	0.00117819	-0.000345238
C14orf182	1.05343e-21	6.20993e-05	1.34757e-21	4.03135e-21	-2.27911e-21	-1.46597e-21
C14orf2	1.05343e-21	3.1773e-22	1.34757e-21	0.00316405	0.00208541	-1.46597e-21
C14orf80	1.05343e-21	3.1773e-22	1.34757e-21	4.03135e-21	-2.27911e-21	9.30609e-05
C15orf39	1.05343e-21	3.1773e-22	1.34757e-21	4.03135e-21	-2.27911e-21	-0.0001911
C15orf40	0.000537488	0.0111665	0.000416245	0.0039635	1.24488e-05	-1.46597e-21
C15orf48	-0.0419321	-0.0122825	-0.0513067	-0.00791838	-0.00784607	-0.00317431
C15orf52	1.05343e-21	-0.000225556	0.000702357	0.000204865	-0.000151906	-0.000111321
C16orf13	0.00366671	0.00198876	0.00243708	0.00304404	0.00586435	0.00302065
C16orf54	1.05343e-21	3.1773e-22	1.34757e-21	0.000460616	1.84476e-06	0.000383395
C16orf55	1.05343e-21	3.1773e-22	1.34757e-21	4.03135e-21	-2.96103e-05	-1.46597e-21
C16orf58	0.00103812	3.1773e-22	1.34757e-21	4.03135e-21	-2.27911e-21	-1.46597e-21
C16orf59	1.05343e-21	3.1773e-22	1.34757e-21	4.03135e-21	-2.27911e-21	3.21261e-05
C16orf62	-0.00314287	-0.00137982	0.00634117	0.00239707	0.0215837	0.00823478
C16orf70	-0.000105267	3.1773e-22	1.34757e-21	2.34587e-05	-2.27911e-21	-1.46597e-21
C16orf78	-0.000236645	3.1773e-22	1.34757e-21	-0.000142281	-2.27911e-21	-1.46597e-21
C16orf80	0.0148225	0.007666	0.00892877	0.011549	0.00990122	0.0101584
C16orf87	1.05343e-21	3.1773e-22	1.34757e-21	0.000445903	-2.27911e-21	0.000188939
C16orf89	1.05343e-21	3.1773e-22	1.34757e-21	1.51798e-05	-2.27911e-21	-1.46597e-21
C17orf104	-4.00531e-05	3.1773e-22	1.34757e-21	5.65113e-05	-2.27911e-21	-1.46597e-21
C17orf49	0.101147	0.0757545	0.109394	0.235653	0.136493	0.0931969
C17orf58	0.00321252	3.1773e-22	1.34757e-21	4.03135e-21	-2.27911e-21	-1.46597e-21
C17orf59	0.00191714	-0.00366225	0.00877709	0.000923798	0.000193662	0.00719639
C17orf62	0.00264727	0.00133849	0.0149151	0.000901765	0.000922329	0.00284484
C17orf75	0.0100428	-0.00281788	0.00134948	0.00705537	0.00211699	0.00507185
C17orf77	1.05343e-21	0.000885907	1.34757e-21	5.51553e-05	0.000414691	-1.46597e-21
C17orf80	1.05343e-21	3.1773e-22	1.34757e-21	4.03135e-21	0.00020436	-1.46597e-21
C17orf85	0.000156239	-0.000657499	0.0158581	0.00562789	8.087e-05	0.00810018
C17orf96	0.000113503	-0.000351498	1.34757e-21	-5.04733e-05	-3.43834e-05	2.25362e-05
C18orf25	0.0199523	-0.00113803	0.00716813	0.00113736	-0.00968067	0.00393834
C18orf8	0.00159586	0.00111325	0.00711437	0.00589226	0.001991	-0.000289742
C19orf10	0.0898752	0.0616501	0.102287	0.407112	0.103395	0.204801
C19orf12	0.00327171	-0.00198572	0.00389196	0.00407298	0.00445334	0.00591055
C19orf25	0.000436482	0.00376679	0.00906224	0.00706621	0.00759093	0.00275322
C19orf33	1.05343e-21	3.1773e-22	1.34757e-21	4.03135e-21	-2.27911e-21	-1.46597e-21
C19orf35	1.05343e-21	3.1773e-22	0.000762872	0.000297578	0.000509908	0.000394142
C19orf38	1.05343e-21	3.1773e-22	1.34757e-21	6.52347e-05	-2.27911e-21	-1.46597e-21
C19orf43	0.0112375	0.000421881	0.000364194	0.000563317	0.0006885	-0.000306824
C19orf47	7.65652e-06	3.1773e-22	1.34757e-21	3.25827e-05	0.000140322	-1.46597e-21
C19orf52	0.000137343	3.1773e-22	1.34757e-21	7.14181e-05	-4.62498e-05	-1.46597e-21
C19orf54	1.05343e-21	3.1773e-22	0.00217258	8.43148e-05	0.000209941	0.00166861
C19orf59	1.05343e-21	0.00014027	0.00105471	0.000522187	0.00137561	0.000393995
C19orf66	0.0199658	0.00821196	0.00974589	0.0100911	0.00836921	0.00805658
C19orf68	-0.000193269	3.1773e-22	2.02064e-06	8.75366e-05	-2.60397e-05	3.88488e-05
C19orf70	0.00178552	0.00253189	0.00347718	0.0117566	0.00639273	0.00520092
C1GALT1	1.05343e-21	3.1773e-22	1.34757e-21	-4.45229e-05	0.000240254	-1.46597e-21
C1orf106	1.05343e-21	0.000124265	0.000593929	0.000608408	-0.00200682	-0.00922705
C1orf109	1.05343e-21	3.1773e-22	1.34757e-21	4.03135e-21	2.0805e-05	-1.46597e-21
C1orf116	-0.0301859	-0.0397844	-0.053478	-0.0421846	-0.0488025	-0.044702
C1orf122	-0.00251428	0.00194336	-0.000695504	-0.000299232	0.000305983	0.000739564
C1orf123	0.0452615	0.0814061	-0.0714308	0.124842	0.0601554	-0.0114081
C1orf127	1.05343e-21	3.1773e-22	1.34757e-21	3.29838e-05	-2.27911e-21	-1.46597e-21
C1orf141	1.05343e-21	3.1773e-22	1.34757e-21	4.03135e-21	-2.27911e-21	4.11301e-05
C1orf168	1.05343e-21	3.1773e-22	1.34757e-21	1.83644e-07	-2.27911e-21	-1.46597e-21
C1orf172	0.000116426	3.1773e-22	3.68878e-05	1.31269e-05	0.00020226	-1.4158e-05
C1orf174	1.05343e-21	3.1773e-22	1.34757e-21	4.03135e-21	-2.27911e-21	-0.00110253
C1orf177	1.05343e-21	-0.000152804	1.34757e-21	-6.80909e-05	-0.000214807	-1.46597e-21
C1orf185	1.05343e-21	0.000381354	1.34757e-21	4.03135e-21	-0.00338181	-1.46597e-21
C1orf195	1.05343e-21	3.1773e-22	1.34757e-21	4.03135e-21	0.00126197	-1.46597e-21
C1orf198	-7.06054e-05	0.000220779	0.000605101	0.000225009	0.000132161	-4.60064e-05
C1orf21	1.05343e-21	3.1773e-22	1.34757e-21	0.000507432	-2.27911e-21	-1.46597e-21
C1orf226	1.05343e-21	3.1773e-22	1.34757e-21	2.70872e-05	-2.27911e-21	-1.46597e-21
C1orf27	0.00253284	-0.00038769	0.000753577	0.000554866	-6.43183e-05	0.000139145
C1orf35	0.00983468	0.000471745	0.0130794	0.00532904	0.00853146	0.00193395
C1orf50	1.05343e-21	3.1773e-22	1.34757e-21	-1.80459e-05	0.00117092	0.000348856
C1orf52	1.05343e-21	3.1773e-22	1.34757e-21	-1.06558e-05	-2.27911e-21	-1.46597e-21
C1orf65	1.05343e-21	3.1773e-22	1.34757e-21	3.20833e-05	-2.27911e-21	-1.46597e-21
C1orf68	1.05343e-21	3.1773e-22	1.34757e-21	-0.00011282	-2.27911e-21	-1.46597e-21
C1orf85	-0.000972464	0.00198732	-0.0112951	0.00318922	-0.000254332	-0.000788449
C1orf95	0.0120377	-0.000585616	0.0155926	0.00595486	0.004445	0.0176331
C1QA	1.05343e-21	-0.000391132	-0.000292264	7.0597e-05	-0.00134889	0.00466867
C1QB	-0.0048831	0.0792431	0.0608863	0.101276	0.0143823	0.560846
C1QBP	1.73776	-0.00203194	1.07335	1.03234	2.29284	0.250328
C1QC	-0.00456212	-0.00402632	0.040175	0.0313125	0.0945709	0.093743
C1QTNF5	1.05343e-21	3.1773e-22	1.34757e-21	4.14392e-06	-2.27911e-21	-1.46597e-21
C1QTNF7	-0.000222429	3.1773e-22	1.34757e-21	4.03135e-21	-2.27911e-21	-1.46597e-21
C1QTNF9	1.05343e-21	3.1773e-22	0.00206939	4.03135e-21	-2.27911e-21	-1.46597e-21
C1R	0.0161228	0.00958597	-0.00180803	0.00803564	0.0102681	-0.0027049
C1RL	1.05343e-21	2.59147e-06	1.34757e-21	0.000140732	0.000120498	-1.46597e-21
C1S	0.0299238	0.0158118	0.0618767	0.0341301	0.0127512	0.0516655
C2	0.00147661	0.00139409	0.00466707	0.00636684	0.00381313	0.00709742
C20orf24	1.05343e-21	3.1773e-22	0.00136116	4.03135e-21	-2.27911e-21	-1.46597e-21
C20orf26	-0.00261152	-9.95547e-05	-0.0005275	-0.000932026	-0.000172858	-0.00190409
C20orf27	0.000383237	0.00680632	1.34757e-21	0.0082418	0.00138915	0.00275928
C20orf85	1.05343e-21	3.1773e-22	1.34757e-21	-0.000985394	-2.27911e-21	-1.46597e-21
C21orf33	0.0359812	-0.0223716	0.00831411	0.0488511	0.101857	-0.0155617
C21orf59	6.95107e-05	-1.32133e-05	0.000109728	0.000679859	0.000188106	-3.40362e-05
C2CD2	1.05343e-21	3.1773e-22	-0.000459524	4.03135e-21	0.000148022	-5.72392e-06
C2CD5	0.000326393	0.000247289	0.000289325	0.000629819	0.000278491	0.00047658
C2orf16	0.00316902	0.000240978	0.000132582	0.00642657	-6.28453e-05	0.00088099
C2orf27B	-0.0189706	3.1773e-22	1.34757e-21	4.03135e-21	-2.27911e-21	-1.46597e-21
C2orf43	0.00123722	6.0701e-05	0.00217986	0.00130957	-0.000259369	0.00127812
C2orf47	0.00263381	-0.000777206	0.00411769	0.00252392	0.00201876	-1.57078e-05
C2orf49	-0.0164289	2.76754e-05	0.000495365	0.00158808	4.88302e-05	-1.46597e-21
C2orf54	-0.336581	-0.166347	-0.166206	-0.292997	-0.258108	-0.153668
C2orf69	0.00301282	6.85043e-05	0.000640279	0.000498178	0.000162703	0.000187996
C2orf71	-9.30592e-05	3.1773e-22	1.34757e-21	-3.46871e-06	-2.27911e-21	-1.46597e-21
C2orf76	0.00070794	3.1773e-22	0.000724417	0.000624542	-0.000826543	-0.00140432
C2orf82	1.05343e-21	3.1773e-22	1.34757e-21	4.03135e-21	9.43717e-05	0.000160591
C3	0.782012	0.0447514	0.326002	0.388802	0.746593	-0.191561
C3orf17	1.05343e-21	4.12873e-06	9.23301e-05	4.03135e-21	-2.37298e-05	-1.46597e-21
C3orf20	-4.51342e-05	3.1773e-22	1.34757e-21	4.03135e-21	-2.27911e-21	-1.46597e-21
C3orf37	0.00633236	0.00293083	0.0150008	0.0189322	0.00929598	0.0053026
C3orf55	1.05343e-21	3.1773e-22	1.34757e-21	-0.000202481	-2.27911e-21	-1.46597e-21
C3orf58	0.00234467	7.9745e-05	-0.000420429	0.0049706	-0.000435524	-3.48112e-05
C4A	0.00215934	0.0637661	0.00962504	0.115074	0.043497	0.0600902
C4BPA	0.142066	0.109338	0.117629	0.0196184	0.166013	0.0927504
C4orf21	1.05343e-21	3.1773e-22	1.34757e-21	2.76298e-06	-2.27911e-21	-1.46597e-21
C4orf27	0.0144294	0.00357608	0.0277557	0.0127845	0.0217602	0.00256807
C4orf29	1.05343e-21	3.1773e-22	-3.33322e-05	4.03135e-21	-2.27911e-21	-1.46597e-21
C4orf3	0.000199934	-2.2311e-05	4.64487e-07	9.40318e-05	2.47627e-05	3.35646e-05
C4orf32	0.00406008	3.1773e-22	1.34757e-21	4.03135e-21	-2.27911e-21	-1.46597e-21
C4orf33	1.05343e-21	-0.000420038	-0.000697253	-0.000177817	-0.000425509	5.24871e-05
C5	0.0082333	0.00450463	0.00373399	0.0181526	0.00360393	0.00556863
C5AR1	0.013866	0.005998	0.0020393	0.0154513	0.00201587	0.0675483
C5orf20	-3.19771e-05	3.1773e-22	2.61952e-06	4.03135e-21	-2.27911e-21	-1.46597e-21
C5orf22	1.05343e-21	3.1773e-22	1.34757e-21	1.93409e-05	-2.27911e-21	-1.46597e-21
C5orf24	1.05343e-21	3.1773e-22	1.34757e-21	4.03135e-21	0.000190005	-1.46597e-21
C5orf38	1.05343e-21	3.1773e-22	1.34757e-21	4.03135e-21	-2.27911e-21	-0.000196634
C5orf50	1.05343e-21	3.1773e-22	1.34757e-21	0.000148114	-6.28557e-05	-1.46597e-21
C5orf51	0.00344731	-0.00492852	0.00153258	0.00149224	-0.000657643	0.00103883
C6	0.0080884	0.00890851	0.0111344	0.00636441	0.00554367	0.00413878
C6orf120	1.05343e-21	3.1773e-22	1.34757e-21	-4.79749e-06	1.42197e-06	-1.46597e-21
C6orf132	-0.0213746	-0.00695757	-0.00750072	-0.00814302	-0.010774	-0.0073166
C6orf136	1.05343e-21	-8.13656e-05	1.34757e-21	1.1174e-05	-2.27911e-21	-1.46597e-21
C6orf15	1.05343e-21	3.1773e-22	1.34757e-21	3.56369e-05	-2.27911e-21	-1.46597e-21
C6orf163	0.00556338	-0.00158469	-0.00102966	0.0106731	0.00429726	0.00455173
C6orf170	-0.00085217	3.1773e-22	1.34757e-21	4.03135e-21	-2.27911e-21	-1.46597e-21
C6orf183	1.05343e-21	3.1773e-22	1.34757e-21	-2.92937e-05	-2.27911e-21	-1.46597e-21
C6orf203	0.00749295	0.000697002	0.000819118	0.00781151	0.0240534	0.00207303
C6orf211	0.0213518	0.00730555	0.0173516	0.0162298	0.0156445	0.0082922
C6orf223	0.00458072	0.00966632	0.0239704	0.0226258	0.0159553	0.0133085
C6orf47	-0.00137224	-0.00397188	-0.000705679	0.000727544	0.000458439	0.000623717
C6orf57	1.05343e-21	0.000943679	2.13216e-05	4.08677e-05	-2.27911e-21	-1.46597e-21
C6orf70	0.000335312	0.000148032	-5.35155e-05	0.000391752	0.000476532	-1.50424e-05
C7	0.00308101	0.000927942	0.0025842	0.00831462	0.000974186	0.00462505
C7orf25	1.05343e-21	3.1773e-22	1.34757e-21	-7.11496e-06	-2.27911e-21	-0.000305828
C7orf26	0.0170405	-0.00378554	-0.000396369	0.00944242	0.0088299	-0.0129217
C7orf50	0.0123072	0.0117003	0.0317151	0.0241056	0.0221832	0.0166793
C7orf55	1.05343e-21	3.1773e-22	1.34757e-21	4.03135e-21	-2.27911e-21	0.00033428
C7orf63	1.05343e-21	3.1773e-22	1.34757e-21	4.03135e-21	-2.27911e-21	-3.55008e-05
C8A	0.00448125	0.00525825	0.0125366	0.00668907	0.00332921	0.00731279
C8B	0.0179183	0.0251464	0.0284265	0.0231949	0.0126393	0.0204942
C8G	0.0633204	0.0122896	0.0031911	0.0336064	0.0474901	0.00586771
C8orf33	1.05343e-21	3.1773e-22	0.00758716	4.03135e-21	-2.27911e-21	-1.46597e-21
C8orf76	1.05343e-21	3.1773e-22	1.34757e-21	6.74656e-07	-2.27911e-21	2.35298e-05
C8orf82	0.00284641	-0.000574485	0.000237913	0.00377228	0.00507771	0.00166062
C9	0.163073	0.123034	0.0460523	0.0865914	0.138743	0.0777145
C9orf114	8.64991e-05	0.00039221	-2.10023e-05	0.000504629	0.00034135	-4.87509e-05
C9orf142	0.0485768	0.0322021	0.058023	0.0558432	0.0426886	0.0585063
C9orf16	-0.000834468	3.1773e-22	1.34757e-21	4.03135e-21	-2.27911e-21	-1.46597e-21
C9orf169	-0.00097508	-0.00576005	-0.00202353	-0.0085976	-0.00963296	-1.46597e-21
C9orf24	1.05343e-21	3.1773e-22	1.34757e-21	4.03135e-21	-0.000136221	-1.46597e-21
C9orf40	1.70776e-05	3.1773e-22	1.34757e-21	0.000237013	0.000132994	-1.46597e-21
C9orf41	-5.43601e-05	-5.68844e-05	0.00517841	-3.37383e-05	-0.000175324	-3.99224e-05
C9orf50	1.05343e-21	3.1773e-22	1.34757e-21	9.27042e-06	-2.27911e-21	-1.46597e-21
C9orf57	1.05343e-21	3.1773e-22	-0.000887433	0.00560288	0.0050972	-1.46597e-21
C9orf64	0.0114854	0.00187986	0.0115808	0.00971182	0.00289709	0.00792875
C9orf78	0.000806636	0.00301543	0.000498101	0.00378489	0.00609229	0.00415241
C9orf84	1.05343e-21	3.1773e-22	1.34757e-21	-1.17077e-05	-4.10702e-06	-1.46597e-21
C9orf89	0.000258388	-0.000410883	1.34757e-21	0.000836285	9.35719e-05	0.00129142
CA1	5.95286	-0.852014	2.83643	2.22917	2.58717	0.377412
CA12	0.00864805	-0.00530412	-5.01122e-05	0.0046781	0.0121805	-0.00749514
CA13	1.05343e-21	-0.000384142	-0.000298481	-0.00101169	-2.27911e-21	-0.00156411
CA2	0.32604	-0.375072	-0.247602	0.0353807	-0.33421	0.0151087
CA3	0.000118838	3.1773e-22	2.49432e-05	-0.000136684	-3.55732e-05	-0.000252291
CA4	1.05343e-21	3.1773e-22	1.34757e-21	-0.000267479	-2.27911e-21	-1.46597e-21
CA5B	3.12674e-05	3.1773e-22	1.34757e-21	4.03135e-21	-2.27911e-21	-1.46597e-21
CA6	1.05343e-21	3.1773e-22	1.34757e-21	4.03135e-21	-0.00546583	-1.46597e-21
CA8	0.000874096	3.1773e-22	1.34757e-21	4.03135e-21	-2.27911e-21	-1.46597e-21
CA9	1.05343e-21	3.1773e-22	1.34757e-21	0.000419433	-2.27911e-21	-1.46597e-21
CAAP1	-5.07246e-05	-0.000428115	-0.000507401	-0.000119894	-0.000372193	4.79526e-05
CAB39	0.0237359	-0.00400443	0.0618319	0.0237301	0.0293096	0.0509434
CAB39L	0.00671474	-0.0228758	-0.014721	-0.02562	0.0222819	-0.0123161
CABLES2	1.05343e-21	3.1773e-22	1.34757e-21	4.03135e-21	-2.27911e-21	-1.46597e-21
CABP1	1.05343e-21	3.1773e-22	1.34757e-21	9.34188e-05	-2.27911e-21	-1.46597e-21
CABP4	1.05343e-21	3.1773e-22	1.34757e-21	-9.9767e-06	-2.27911e-21	-1.46597e-21
CACHD1	-8.0281e-05	3.1773e-22	1.34757e-21	4.03135e-21	-2.27911e-21	-1.46597e-21
CACNA1E	1.05343e-21	0.000306319	0.00119652	0.000320196	0.00127486	0.000303115
CACNA1H	-0.000736347	3.1773e-22	1.34757e-21	-0.000500014	0.000122859	-1.46597e-21
CACNA1S	1.05343e-21	3.1773e-22	1.34757e-21	3.40269e-06	-2.27911e-21	-4.57735e-05
CACNA2D1	0.00944415	0.00270161	0.00552129	0.00277562	0.000920081	0.00618676
CACNB2	1.05343e-21	3.1773e-22	1.34757e-21	-2.90862e-05	-2.27911e-21	-1.46597e-21
CACNB3	0.0687593	0.00228943	0.00946279	0.00428813	0.00172164	0.00583594
CACNG6	-0.00932699	0.00090187	-0.00346644	0.00184417	0.00899345	0.00536781
CACTIN	1.05343e-21	6.44941e-05	0.00128727	0.000254506	3.47787e-05	0.00019889
CACUL1	0.000111291	-0.000120348	3.89179e-06	0.000400353	0.00125042	2.86935e-06
CACYBP	0.0734014	0.0423966	0.236287	0.0894861	0.0473018	0.0430454
CAD	0.0673506	0.0396521	0.0255372	0.0377342	0.0568204	0.0226321
CADM1	0.00315062	0.00138008	0.000326267	0.00531281	0.00137646	-2.43115e-05
CADM3	1.05343e-21	3.1773e-22	1.34757e-21	-0.000166586	-2.27911e-21	-1.46597e-21
CADM4	1.05343e-21	-0.000327129	1.34757e-21	0.000120106	-0.000157214	-0.000435168
CADPS	0.0172571	3.1773e-22	1.34757e-21	0.000505045	0.00310858	0.0166153
CADPS2	1.05343e-21	3.1773e-22	1.34757e-21	9.48025e-05	-2.27911e-21	-1.46597e-21
CALB1	1.05343e-21	3.1773e-22	1.34757e-21	4.03135e-21	-2.27911e-21	-1.46597e-21
CALB2	0.00280809	3.1773e-22	0.449638	0.0359493	0.00623943	-1.46597e-21
CALCOCO1	0.000255866	-0.00184901	1.11491e-05	-0.000790041	-0.000320938	0.000151927
CALCOCO2	-5.74775e-05	3.1773e-22	-5.80076e-05	-2.29805e-06	-0.000231225	-5.01061e-05
CALCRL	1.05343e-21	9.90224e-06	0.000694164	4.45328e-05	-2.27911e-21	-1.46597e-21
CALD1	1.29768	0.530451	0.746253	0.628564	0.661152	0.683694
CALHM1	0.000583797	3.1773e-22	1.34757e-21	-0.000231766	-0.000529593	-1.46597e-21
CALML3	-6.78064	-7.0748	-9.18898	-8.42621	-6.51109	-8.36219
CALML5	3.78439	3.89155	-2.85861	3.19697	0.707313	0.401231
CALN1	-0.00503662	3.1773e-22	0.00464773	4.03135e-21	0.0139353	-1.46597e-21
CALR	3.52103	2.5482	4.07789	4.33108	3.21378	3.28681
CALU	0.320176	0.180274	0.426798	0.229254	0.279853	0.180593
CAMK1	0.00665893	8.97763e-05	0.00291678	0.00320837	0.00389794	0.00478815
CAMK1D	0.00290854	-0.00187419	-0.000194427	-0.00160163	0.00166007	0.00134853
CAMK2D	0.00715317	-0.00324265	0.00260881	0.00220091	0.0155193	0.0134605
CAMK2G	0.0221413	0.0076774	0.0192265	0.0178983	0.017082	0.0199503
CAMK4	1.05343e-21	0.000839645	1.34757e-21	4.03135e-21	-2.27911e-21	-1.46597e-21
CAMKK2	1.05343e-21	3.1773e-22	1.34757e-21	4.03135e-21	3.56814e-06	-1.46597e-21
CAMKV	1.05343e-21	3.1773e-22	1.34757e-21	-0.00165965	-2.27911e-21	-1.46597e-21
CAMLG	1.05343e-21	-1.14101e-05	4.97449e-06	6.41262e-05	0.000166463	3.72683e-05
CAMP	0.140304	0.0288804	0.141107	0.10797	0.0897894	0.0561667
CAMSAP1	-3.89102e-05	1.75523e-05	-0.000232565	2.90119e-05	1.89462e-05	2.33876e-05
CAMSAP2	0.00128859	3.1773e-22	1.34757e-21	0.00106766	-3.9382e-05	-1.46597e-21
CAMSAP3	0.00708599	0.00265213	-0.000671937	0.000322678	-0.0008071	-0.000506086
CAMTA1	1.83971e-05	-9.19209e-06	1.46797e-05	4.0324e-06	1.74442e-07	0.000159625
CAMTA2	0.000319329	3.1773e-22	-0.00025132	-6.94635e-05	0.00189385	0.000566819
CAND1	0.18645	0.0381038	0.125263	0.150617	0.124829	0.141277
CAND2	1.05343e-21	3.1773e-22	0.000758774	0.000346887	0.000559435	0.000393458
CANT1	-0.00159463	0.00140934	0.00185012	-0.000877042	-0.000676323	0.00226562
CANX	1.82208	0.489557	1.2876	0.993025	1.41125	0.683885
CAP1	0.812533	0.302798	0.271953	0.914085	1.29138	0.436573
CAP2	0.0027417	0.000613039	0.00359466	0.00437111	0.000306718	0.00291381
CAPG	-0.0381953	0.351834	-0.180254	0.368719	0.526257	0.0469593
CAPN1	-0.821137	-0.531556	-0.887872	-0.888914	-0.690824	-0.713997
CAPN13	1.05343e-21	3.1773e-22	1.34757e-21	4.03135e-21	-2.27911e-21	-1.46597e-21
CAPN14	-0.000310589	-0.00116415	-0.000175756	-0.0015973	-0.00146235	-0.000543273
CAPN15	4.885e-05	3.1773e-22	0.000187126	2.29605e-05	8.12106e-06	-1.46597e-21
CAPN2	0.0922355	0.0245722	0.0324689	0.0230651	0.0269036	0.0385062
CAPN5	-0.000180326	-5.67039e-05	-0.000103007	-0.000226261	-2.27911e-21	-0.000317182
CAPN6	1.05343e-21	3.1773e-22	1.34757e-21	4.03135e-21	-2.38121e-05	-1.46597e-21
CAPN7	0.000359952	-0.000748936	-0.00111052	-0.00059926	-0.000761251	4.6607e-05
CAPNS1	0.0604879	-0.0413924	-0.0784036	-0.0193453	0.0936588	0.000811188
CAPNS2	0.169788	-0.0623382	-0.322623	-0.119274	-0.134428	-0.212646
CAPRIN1	0.0403804	0.00587868	0.0416209	0.0640035	0.0307155	0.0140718
CAPRIN2	1.05343e-21	3.1773e-22	1.34757e-21	1.32862e-05	7.52509e-05	-1.46597e-21
CAPS	0.000134988	2.59572e-05	0.000245833	0.000568558	0.000709267	0.000691802
CAPZA1	2.21701	0.480016	1.7194	1.12919	2.89425	1.32475
CAPZA2	0.625692	0.212969	1.69194	0.481979	0.533818	0.925856
CAPZB	0.152753	-0.0217631	0.250585	0.0583048	0.0352369	0.153708
CARD10	1.05343e-21	3.1773e-22	1.34757e-21	0.000663895	0.00773561	-1.46597e-21
CARD11	1.05343e-21	3.1773e-22	1.34757e-21	-9.86296e-06	4.11807e-05	4.50639e-05
CARD14	-0.0014356	-0.00228439	-0.00171034	-0.000760873	-0.00123802	5.64396e-05
CARD16	1.05343e-21	0.000425513	1.34757e-21	0.000536699	-2.27911e-21	0.00474858
CARD17	1.05343e-21	3.1773e-22	0.0290166	0.00675287	-0.00010331	-0.000196502
CARD18	-0.000740274	-0.0054614	0.000614169	-0.000354846	-0.00175949	-0.000368187
CARD6	-1.31154e-05	-7.58203e-05	6.16716e-05	7.77463e-06	2.71369e-05	-1.46597e-21
CARD8	0.00119376	0.00861826	0.012659	0.00942723	0.00942574	0.0127526
CARD9	0.00702432	5.75253e-05	0.00908625	0.000835494	0.0317252	-0.00393701
CARHSP1	0.337192	0.0327458	-0.184341	-0.0818296	0.3393	0.012977
CARKD	0.00397505	-0.000555683	0.000132979	0.00330897	-0.00491024	0.00181093
CARM1	0.0128985	-0.00991441	-0.00152221	-0.002419	-0.0119291	0.00561317
CARS	0.079032	0.00220939	0.0505739	0.065903	0.0582326	0.0541226
CARS2	0.00303279	-1.12916e-05	0.000306513	0.00104759	-2.68977e-05	0.00156519
CASC1	1.05343e-21	0.000576991	1.34757e-21	4.03135e-21	-2.27911e-21	-1.46597e-21
CASC3	0.000687806	3.1773e-22	1.34757e-21	0.000606886	-5.43617e-05	0.000250349
CASC4	0.000514841	0.000116408	0.000845455	0.000483424	0.000170972	-3.25503e-05
CASC5	1.05343e-21	3.1773e-22	1.34757e-21	4.03135e-21	-4.62544e-05	-0.00035584
CASK	0.0355417	0.00187953	0.0257255	0.0188762	0.00726336	0.00523629
CASKIN1	1.05343e-21	3.1773e-22	1.34757e-21	4.03135e-21	-2.27911e-21	-1.46597e-21
CASKIN2	1.05343e-21	3.1773e-22	1.34757e-21	-8.47814e-06	-2.27911e-21	-1.46597e-21
CASP1	0.0197186	-0.00958887	0.0188636	0.0327944	0.0130907	0.0141166
CASP10	0.00834731	0.00537749	-0.00491452	0.00969417	0.00823699	0.00658505
CASP14	-0.00406167	0.00618933	-0.00776842	0.011263	-0.000258999	0.052849
CASP2	1.05343e-21	3.1773e-22	1.34757e-21	4.03135e-21	1.50708e-05	-1.46597e-21
CASP3	0.000164294	0.00314378	0.0128932	0.00586483	0.00528176	0.00700261
CASP4	1.05343e-21	-4.90208e-05	0.000574896	0.00365749	0.00273029	-2.70611e-05
CASP6	0.00345989	-0.000122606	0.0037754	0.0226233	0.00151562	0.0111267
CASP7	0.00414521	0.00348606	-0.00134856	0.00318684	0.00166987	0.00586851
CASP8	0.0148586	0.00844999	0.0152649	0.0152802	0.0109029	0.0130724
CASP8AP2	0.00275131	-6.82614e-06	-2.00163e-05	0.000283258	0.0018544	0.00144681
CASP9	0.000116621	3.1773e-22	-0.000114033	6.32989e-06	-1.40889e-05	0.000187723
CAST	-0.564165	-0.414133	-0.335208	-0.267303	-0.225078	-0.249331
CASZ1	0.000127621	-0.000163275	-4.42092e-05	0.000113103	2.80592e-05	0.000143424
CAT	0.32654	0.518534	0.305436	0.336567	0.356913	0.437721
CAV1	0.0881865	0.0569133	0.140205	0.0975177	0.0318294	0.11411
CAV2	1.05343e-21	3.1773e-22	1.34757e-21	4.03135e-21	-6.6392e-05	-1.46597e-21
CBFB	0.110046	0.00534138	0.0417448	0.0611184	0.0653765	0.0604277
CBL	0.000191151	0.000311977	0.00208406	0.00209958	0.000554715	0.00224774
CBLB	1.05343e-21	3.1773e-22	0.000151416	1.87861e-05	7.51719e-05	-1.46597e-21
CBLC	-0.000184193	-0.000242651	8.44607e-05	-0.000121568	-0.000174814	-3.80405e-05
CBLL1	6.65921e-05	0.000687665	0.000307329	0.00277318	0.00212274	0.00114479
CBR1	17.5849	-1.25881	11.3183	5.28184	8.16788	-1.63432
CBR3	5.00873	-0.814618	2.68189	0.960062	1.82896	-0.717453
CBR4	0.159726	-0.0107447	0.121119	0.0139651	0.00627081	0.00832469
CBX1	0.0949346	0.058238	0.561674	0.561863	0.333933	0.308285
CBX3	0.32476	0.412772	0.986941	0.564901	0.450989	0.426535
CBX5	0.0160316	-0.00779476	0.0581526	0.0207084	-1.92457e-05	0.00187991
CBX6	0.00114828	3.1773e-22	-3.06151e-05	9.06253e-05	2.01348e-05	0.000272703
CBX8	1.85666e-05	-2.26839e-06	1.34757e-21	6.79261e-06	-2.27911e-21	-5.33767e-05
CC2D1A	0.00725824	-0.0049278	0.00477905	0.00355318	-0.00970418	0.0053182
CC2D1B	0.000337114	-0.00145711	-0.00105058	0.000262324	0.000444716	-0.000204895
CC2D2A	0.000103932	3.1773e-22	1.34757e-21	4.03135e-21	-2.27911e-21	-1.46597e-21
CCAR1	0.0104064	0.00421794	0.0289027	0.0217644	0.0115673	0.0131293
CCBL2	-0.00423245	-0.00115655	0.00236574	0.00646278	0.00627368	0.00955576
CCDC101	1.05343e-21	3.1773e-22	1.34757e-21	0.00103611	0.00321793	-1.46597e-21
CCDC102A	0.012267	0.00555655	-0.00596309	-0.00127488	0.00555393	0.000216465
CCDC102B	1.05343e-21	3.1773e-22	1.34757e-21	5.4383e-06	-2.27911e-21	-1.46597e-21
CCDC104	1.05343e-21	3.1773e-22	1.36785e-05	4.03135e-21	-2.27911e-21	-1.46597e-21
CCDC108	1.05343e-21	3.1773e-22	1.34757e-21	0.000310243	-2.27911e-21	-1.46597e-21
CCDC109B	1.05343e-21	3.1773e-22	1.34757e-21	4.03135e-21	0.000141437	-1.46597e-21
CCDC11	1.05343e-21	-9.18579e-06	1.34757e-21	7.11363e-05	-2.27911e-21	-1.46597e-21
CCDC114	-3.30569e-05	3.1773e-22	1.34757e-21	4.03135e-21	-2.27911e-21	-1.46597e-21
CCDC115	0.0371756	-0.00142009	-0.00526122	0.00118445	0.00519626	-0.0114835
CCDC116	0.000265881	3.1773e-22	1.34757e-21	4.03135e-21	-2.27911e-21	-1.46597e-21
CCDC117	1.05343e-21	3.1773e-22	-9.07711e-05	0.000307309	-4.93148e-05	0.000156342
CCDC12	0.0101882	0.0123706	0.0245675	0.0279073	0.0267377	0.0150721
CCDC120	-2.32623e-05	3.1773e-22	-0.000194717	-0.000424997	-0.000624008	-0.00020192
CCDC124	0.0663341	-0.0149515	-0.0447456	0.00415183	0.0718397	-0.0301946
CCDC126	1.05343e-21	-5.52286e-05	0.000144836	-2.09942e-06	0.000192473	-4.68136e-05
CCDC127	1.05343e-21	3.1773e-22	1.34757e-21	0.00102697	-2.27911e-21	-1.46597e-21
CCDC132	0.00295466	0.000988956	0.00123221	0.00559254	0.00401368	0.000952994
CCDC134	0.000513358	-0.000111677	0.00662388	0.00169583	0.000317286	0.000429104
CCDC136	1.05343e-21	3.1773e-22	1.34757e-21	0.000409201	0.000546543	-3.71696e-05
CCDC137	0.000227608	3.1773e-22	2.50634e-06	0.000960708	0.00183044	0.00263701
CCDC14	-0.000198516	3.1773e-22	-0.000238885	-1.69674e-05	-0.000288988	-0.00078731
CCDC141	-0.000392709	-0.000373136	1.34757e-21	-0.000199188	-0.000148033	-0.000582549
CCDC146	1.05343e-21	3.1773e-22	1.34757e-21	4.03135e-21	0.00028842	-1.46597e-21
CCDC147	1.05343e-21	3.1773e-22	1.34757e-21	4.03135e-21	8.89415e-05	-1.46597e-21
CCDC149	1.05343e-21	3.1773e-22	1.34757e-21	-0.000107646	-0.000209894	-1.46597e-21
CCDC15	1.05343e-21	3.1773e-22	1.34757e-21	-1.96821e-05	-2.27911e-21	-1.46597e-21
CCDC150	1.05343e-21	3.1773e-22	1.34757e-21	9.66128e-05	-2.27911e-21	-1.46597e-21
CCDC151	3.04637e-05	0.000351368	-3.29592e-05	0.000177658	0.000118519	6.33997e-06
CCDC152	1.05343e-21	0.00737397	1.34757e-21	4.03135e-21	-2.27911e-21	-1.46597e-21
CCDC153	0.000490621	3.1773e-22	1.34757e-21	4.03135e-21	-2.27911e-21	-1.46597e-21
CCDC154	-8.69762e-06	3.1773e-22	1.34757e-21	-1.07651e-05	-2.27911e-21	2.65755e-05
CCDC155	-0.000396381	3.1773e-22	1.34757e-21	4.03135e-21	-2.27911e-21	-1.46597e-21
CCDC157	1.05343e-21	3.1773e-22	0.000211121	3.17793e-05	-3.92472e-05	-1.46597e-21
CCDC158	1.05343e-21	3.1773e-22	1.34757e-21	4.03135e-21	-2.27911e-21	-1.46597e-21
CCDC167	1.05343e-21	3.1773e-22	1.34757e-21	4.03135e-21	-0.00061264	-1.46597e-21
CCDC168	-5.82062e-06	-2.7163e-06	-7.91231e-06	-2.01121e-06	3.54161e-05	-2.61021e-05
CCDC171	1.05343e-21	0.000136685	1.34757e-21	4.03135e-21	1.70921e-05	-1.46597e-21
CCDC173	9.72259e-05	3.1773e-22	1.34757e-21	0.000135156	-2.27911e-21	-1.46597e-21
CCDC178	1.05343e-21	3.1773e-22	-5.73115e-05	-9.01731e-05	-4.36152e-05	-7.96401e-05
CCDC18	1.05343e-21	-1.61934e-05	1.34757e-21	4.03135e-21	-2.27911e-21	-1.46597e-21
CCDC22	0.0256321	0.00445253	0.0253368	0.0297327	0.0298725	0.0147639
CCDC25	-5.39086e-05	-0.000339638	0.0795513	0.00228592	0.000640138	0.000319044
CCDC27	1.05343e-21	3.1773e-22	1.34757e-21	-0.000100895	-2.27911e-21	-1.46597e-21
CCDC37	1.05343e-21	3.1773e-22	1.34757e-21	4.03135e-21	-2.27911e-21	-0.000228978
CCDC38	-3.82439e-05	3.1773e-22	1.34757e-21	4.03135e-21	-2.27911e-21	-1.46597e-21
CCDC39	0.00481333	3.1773e-22	1.34757e-21	5.48363e-05	0.000868557	0.00536965
CCDC41	-0.000183545	-4.39464e-05	1.34757e-21	-0.000101116	-7.28362e-05	-1.46597e-21
CCDC43	0.00402798	-0.000871849	0.00500931	0.000627089	-0.000950439	5.08772e-05
CCDC47	0.0461598	0.000878879	0.0351799	0.0491372	0.0445976	0.0187879
CCDC50	0.00308879	0.00783831	0.0124056	0.01632	0.00696933	0.0179727
CCDC51	0.000547944	3.1773e-22	0.00110738	0.000783733	8.69891e-06	-1.46597e-21
CCDC53	0.00186068	-0.000680968	0.0036753	0.00684462	0.000668961	0.00268266
CCDC57	1.05343e-21	3.1773e-22	1.34757e-21	1.81813e-05	1.0308e-06	-1.46597e-21
CCDC58	0.0230132	0.00120107	0.0638761	0.032069	0.0116778	0.0025489
CCDC59	1.05343e-21	3.1773e-22	1.34757e-21	0.000213167	-2.27911e-21	-1.46597e-21
CCDC6	-0.00753043	-0.0263453	-0.000617103	-0.0212723	-0.00845833	-0.0265479
CCDC63	1.05343e-21	3.1773e-22	1.34757e-21	4.03135e-21	0.000346018	-1.46597e-21
CCDC64B	-0.137533	-0.103625	-0.125277	-0.146259	-0.140042	-0.100799
CCDC66	1.05343e-21	3.1773e-22	1.34757e-21	7.88088e-05	4.22911e-05	-1.46597e-21
CCDC70	1.05343e-21	3.1773e-22	1.34757e-21	4.03135e-21	-0.00168012	-0.000100328
CCDC71L	2.74594e-05	3.1773e-22	1.34757e-21	2.9691e-05	5.0369e-05	-1.46597e-21
CCDC78	-0.00103624	-0.000347834	1.34757e-21	-0.000994132	-0.000629139	-0.000485732
CCDC8	1.05343e-21	3.1773e-22	1.34757e-21	2.5547e-05	-2.27911e-21	-1.46597e-21
CCDC80	1.05343e-21	3.1773e-22	0.000150151	4.03135e-21	-2.27911e-21	-4.85032e-05
CCDC83	0.00230048	0.000379988	0.00108339	0.000873231	0.00182479	0.00236345
CCDC85C	-0.000644026	3.1773e-22	1.34757e-21	-3.68509e-06	-6.5183e-05	-1.46597e-21
CCDC86	1.05343e-21	0.000164273	1.34757e-21	4.03135e-21	3.34031e-05	-1.46597e-21
CCDC87	1.05343e-21	3.1773e-22	1.34757e-21	-0.000192021	-2.27911e-21	-2.00722e-05
CCDC88A	1.05343e-21	-9.99911e-05	-1.80089e-06	2.33256e-05	0.000228394	0.00136413
CCDC88B	9.98197e-05	0.000896481	0.014274	0.00200178	0.00140698	0.00283243
CCDC88C	0.000352643	6.23065e-05	3.75419e-05	1.38016e-05	0.000223041	3.11062e-05
CCDC89	-0.00161734	3.1773e-22	1.34757e-21	-0.000137603	-2.27911e-21	-1.46597e-21
CCDC9	0.0032656	0.000404993	0.00235346	0.00255389	0.000268629	0.000489793
CCDC90B	0.00168385	0.000242444	0.000641846	0.000665308	0.00025305	0.00188348
CCDC91	1.05343e-21	3.1773e-22	-8.17982e-05	4.03135e-21	-2.27911e-21	-1.46597e-21
CCDC92	1.05343e-21	0.000249938	1.34757e-21	0.000168003	-0.000254366	-1.46597e-21
CCDC93	0.000539942	-0.000146761	0.00404239	0.00163744	0.000756658	0.00146713
CCDC94	0.000645422	0.00298642	-0.0056092	0.00534234	-0.000659467	-0.0014288
CCDC97	1.05343e-21	3.1773e-22	1.34757e-21	6.58711e-05	-2.27911e-21	-1.46597e-21
CCHCR1	1.05343e-21	3.1773e-22	1.34757e-21	0.000729569	-2.27911e-21	-1.46597e-21
CCKBR	1.05343e-21	3.1773e-22	1.34757e-21	-0.000662492	-2.27911e-21	-1.46597e-21
CCL16	0.000550228	-0.000230868	0.000776958	-5.63832e-05	-1.8875e-05	0.00030854
CCL19	4.84604e-05	0.000263802	0.000231635	0.000142668	-2.94282e-06	0.00010122
CCL20	1.05343e-21	3.1773e-22	1.34757e-21	4.03135e-21	-2.27911e-21	-1.46597e-21
CCL21	1.05343e-21	3.1773e-22	1.34757e-21	0.00140181	-2.27911e-21	-1.46597e-21
CCM2	1.05343e-21	3.1773e-22	1.34757e-21	0.000127397	-2.27911e-21	0.000370972
CCM2L	1.05343e-21	3.1773e-22	1.34757e-21	4.03135e-21	-3.61069e-05	-1.46597e-21
CCNA2	1.05343e-21	3.1773e-22	1.34757e-21	0.000163098	-2.27911e-21	-6.67162e-05
CCNB1	0.0011999	3.1773e-22	0.0001492	4.03135e-21	-2.27911e-21	-1.46597e-21
CCNB1IP1	-0.00149736	3.1773e-22	1.34757e-21	4.03135e-21	-2.27911e-21	-1.46597e-21
CCNB2	1.05343e-21	3.1773e-22	1.34757e-21	-3.00416e-05	-2.27911e-21	-1.46597e-21
CCND1	1.05343e-21	3.1773e-22	1.34757e-21	4.03135e-21	-2.27911e-21	-1.46597e-21
CCND2	1.05343e-21	3.1773e-22	1.34757e-21	-0.000208176	-0.000178376	-1.46597e-21
CCNDBP1	0.00012178	3.1773e-22	5.09403e-05	2.12322e-05	-4.0044e-05	-1.46597e-21
CCNH	0.0112722	0.000110526	0.0101494	0.00678753	0.00419806	9.1639e-05
CCNK	0.00499229	-0.00108425	0.00270096	0.0108098	0.00627015	-0.000505395
CCNL1	1.05343e-21	3.1773e-22	-0.000217157	-1.25932e-05	0.000317781	-1.46597e-21
CCNT1	0.000826698	3.1773e-22	1.34757e-21	6.26942e-08	1.9823e-06	-1.46597e-21
CCNT2	1.05343e-21	1.73541e-05	1.34757e-21	4.03135e-21	-2.27911e-21	2.76932e-05
CCNY	0.00490123	0.00317275	-0.001289	0.00225563	0.00416737	0.00326509
CCNYL1	-0.000244166	3.1773e-22	-7.40255e-05	0.000121823	-4.57451e-05	-1.46597e-21
CCP110	1.05343e-21	3.1773e-22	1.34757e-21	4.03135e-21	0.000134889	-1.46597e-21
CCPG1	1.05343e-21	3.1773e-22	1.34757e-21	0.000100857	-2.27911e-21	-1.46597e-21
CCR7	1.05343e-21	3.1773e-22	1.34757e-21	-0.000231661	-2.27911e-21	-1.46597e-21
CCRN4L	1.05343e-21	3.1773e-22	1.34757e-21	4.03135e-21	-2.52134e-05	-1.46597e-21
CCS	0.0621767	0.0282616	0.030284	0.0149818	0.008781	0.0908168
CCSER2	1.05343e-21	3.1773e-22	1.34757e-21	-1.05559e-05	-2.27911e-21	-1.46597e-21
CCT2	0.220524	-0.0687712	0.138433	0.226307	0.222854	0.0935853
CCT3	0.422518	-0.061525	0.120071	0.213127	0.253686	0.0621238
CCT4	0.207224	-0.153561	-0.00519287	0.00084383	0.153373	-0.00731677
CCT5	0.0861521	-0.0342475	0.0426606	0.0645582	0.148876	0.019894
CCT6A	0.388886	-0.0578213	-0.0220387	0.175169	0.525801	-0.245009
CCT6B	-0.0073725	3.1773e-22	0.000546816	0.00703151	-0.00298065	-0.00458808
CCT7	0.145907	0.0498945	0.0264639	0.200037	0.26379	0.0766901
CCT8	0.139591	-0.102079	0.386877	0.0137001	0.107373	0.0917515
CD109	0.0183616	-0.0108542	-0.00550683	0.00461216	-0.00586205	-0.00585791
CD14	0.0317606	0.0138351	0.0212287	0.0596493	0.0363613	0.0546807
CD151	0.00327625	0.00291622	-0.000461353	0.000818124	-0.00126635	-1.95955e-05
CD163	0.00219217	0.00346333	0.00302735	0.00265673	0.00687598	0.00595164
CD163L1	1.05343e-21	3.1773e-22	1.34757e-21	2.45229e-06	-2.27911e-21	5.81329e-06
CD180	1.05343e-21	3.1773e-22	1.34757e-21	4.03135e-21	0.000307613	-1.46597e-21
CD19	1.05343e-21	7.75395e-06	0.00146213	0.000117706	0.000200905	7.73094e-05
CD1A	-0.000624034	-0.000379515	0.000188945	0.000536056	-0.000194427	0.000121547
CD207	-0.00502375	6.11259e-05	-0.00221238	-0.000828321	-0.0008246	-0.000789359
CD209	1.05343e-21	3.1773e-22	1.34757e-21	0.00248881	-2.27911e-21	-1.46597e-21
CD22	1.05343e-21	3.1773e-22	1.34757e-21	0.000387298	0.00166191	0.0206919
CD226	1.05343e-21	3.1773e-22	1.34757e-21	0.000151543	1.58444e-05	1.94246e-05
CD247	1.05343e-21	3.1773e-22	0.000299512	9.08505e-05	9.96315e-05	-1.46597e-21
CD248	1.05343e-21	3.1773e-22	1.34757e-21	0.000555864	0.000417862	0.00039994
CD27	0.00435074	0.00192034	0.00784816	0.00946943	0.00462598	0.00496178
CD274	1.05343e-21	3.1773e-22	1.34757e-21	-0.00071358	0.000567226	-1.46597e-21
CD276	-0.000638124	3.1773e-22	-2.85299e-05	4.03135e-21	-2.27911e-21	-1.46597e-21
CD28	1.05343e-21	3.1773e-22	-0.00225175	4.03135e-21	-2.27911e-21	-1.46597e-21
CD2AP	-0.0352636	0.0106544	0.0214261	0.0412768	0.0157716	0.0170369
CD2BP2	0.00230024	0.00113146	0.0136833	0.0107538	0.00480727	0.00724242
CD300A	0.0039108	0.000294238	0.000403027	0.000646838	0.000802478	3.58524e-05
CD34	-0.000285895	3.1773e-22	1.34757e-21	0.000349076	-9.56851e-05	-1.46597e-21
CD36	0.0110748	-0.00161931	0.000163738	0.013369	0.000617016	9.81821e-07
CD37	1.05343e-21	3.1773e-22	1.34757e-21	8.70506e-07	-2.27911e-21	-1.46597e-21
CD38	3.80797e-05	2.88182e-05	1.67743e-05	0.000102556	0.000205567	0.000338485
CD3D	0.00304139	3.1773e-22	1.34757e-21	4.03135e-21	-9.56915e-06	7.23807e-06
CD3E	1.05343e-21	3.1773e-22	1.34757e-21	2.03462e-05	-2.27911e-21	-1.46597e-21
CD3EAP	1.05343e-21	-2.63144e-05	1.34757e-21	0.000107003	3.44696e-05	3.06289e-05
CD4	1.05343e-21	3.1773e-22	1.34757e-21	0.000212612	0.00101144	0.000283587
CD44	0.222613	-0.0797657	-0.0203655	0.127369	0.211884	-0.0716601
CD47	-0.180927	0.00290459	-0.0155004	0.0516726	0.00372745	-0.000745324
CD48	0.00147344	4.68258e-05	0.00315484	0.00452899	0.00171144	0.00471872
CD5	1.05343e-21	3.1773e-22	1.34757e-21	4.03135e-21	0.000149272	-1.46597e-21
CD53	1.05343e-21	3.1773e-22	1.34757e-21	4.03135e-21	0.000141577	0.000481156
CD55	0.00114408	0.00153499	0.0003322	0.00464984	-0.0013455	0.00323363
CD58	1.05343e-21	3.1773e-22	-2.49734e-05	4.03135e-21	-2.27911e-21	-1.46597e-21
CD59	1.05343e-21	-0.000554589	1.34757e-21	-0.0003433	-2.27911e-21	-1.46597e-21
CD5L	0.00174339	3.1773e-22	1.34757e-21	-0.000195648	-0.000738327	-1.46597e-21
CD63	1.05343e-21	-0.000224366	1.34757e-21	0.00080526	0.00220428	0.000341554
CD68	1.05343e-21	3.1773e-22	1.34757e-21	4.03135e-21	-2.27911e-21	-1.46597e-21
CD70	1.05343e-21	0.00149789	1.07869e-05	4.03135e-21	0.00022207	-1.46597e-21
CD72	1.05343e-21	-6.8574e-05	1.34757e-21	4.03135e-21	-2.27911e-21	-1.46597e-21
CD74	0.261245	0.208616	0.323508	0.554325	0.640547	0.776761
CD79A	1.05343e-21	3.1773e-22	1.34757e-21	4.03135e-21	-2.27911e-21	-1.67747e-05
CD79B	1.05343e-21	-0.000318771	1.34757e-21	4.03135e-21	-2.27911e-21	-1.46597e-21
CD81	0.00587096	0.000111088	0.0126793	0.0112797	0.00629001	0.010315
CD82	-0.0045603	-0.0113874	-0.0100269	0.00633907	0.011587	-0.00313913
CD84	1.05343e-21	3.1773e-22	1.34757e-21	4.03135e-21	-2.27911e-21	0.000130259
CD8A	0.000792349	-0.000567367	0.0111291	0.0115951	0.00863439	0.02869
CD8B	1.05343e-21	3.1773e-22	1.34757e-21	-4.68842e-05	-2.27911e-21	-1.46597e-21
CD9	-0.0308139	-0.0601077	-0.140234	-0.114165	-0.107268	-0.11139
CD93	1.05343e-21	3.1773e-22	1.34757e-21	-3.06591e-06	-2.27911e-21	-1.46597e-21
CD97	0.00205783	0.00624516	0.0102086	0.0109708	0.012572	0.0211832
CD99	-0.00127305	-0.00140474	1.34757e-21	-0.00059715	-0.00347957	0.000524613
CD99L2	0.00237143	-0.000797619	0.00260884	0.00162964	0.000717308	0.00125611
CDA	1.05343e-21	3.1773e-22	1.34757e-21	4.03135e-21	-2.27911e-21	-1.46597e-21
CDAN1	1.05343e-21	3.1773e-22	0.00123045	-3.47636e-05	-9.37823e-07	0.000126188
CDC123	1.05343e-21	0.000198786	-2.992e-05	0.000213149	0.000140162	-6.68647e-05
CDC16	0.000165207	-0.000163629	0.011362	0.000386861	4.71734e-05	0.000755771
CDC20	-0.000163955	3.1773e-22	1.34757e-21	4.03135e-21	-2.27911e-21	-1.46597e-21
CDC23	0.00184527	-0.000240746	0.000251493	0.0010836	-1.75039e-05	0.00254279
CDC25A	1.05343e-21	3.1773e-22	1.34757e-21	-9.77863e-06	-2.27911e-21	-1.46597e-21
CDC26	0.00516923	0.0261186	0.0261193	0.0135892	0.0218768	0.0257963
CDC27	0.00191487	3.21634e-05	-0.0001336	0.0121652	0.0012253	0.000282118
CDC34	4.57624e-05	3.1773e-22	1.34757e-21	-3.00599e-06	-2.27911e-21	-1.46597e-21
CDC37	0.0605984	0.081813	0.232902	0.12255	0.133391	0.0753944
CDC37L1	4.18872e-05	3.1773e-22	0.000381035	3.89586e-05	-2.27911e-21	-1.46597e-21
CDC40	-0.000109893	0.00437941	0.022359	0.0107268	0.00260485	0.00671994
CDC42	0.182099	0.536749	0.482323	0.536375	0.493198	0.674556
CDC42BPA	0.000982797	-1.02143e-05	0.00203537	0.000147812	8.18601e-05	0.000135489
CDC42BPB	0.00704625	0.00665336	0.0215171	0.00645947	0.0101402	-0.00238354
CDC42BPG	0.00275537	0.00209599	-0.00255748	0.000283773	-0.000735593	-0.00115357
CDC42EP1	3.74658e-05	-0.000116149	-0.0001638	0.000702833	0.000178549	-0.000223166
CDC42EP4	0.0132908	0.00365826	0.0177566	0.0173846	0.00959449	0.016813
CDC42EP5	0.0075678	-0.00108114	0.000882522	0.000821015	0.00571504	-0.00104494
CDC42SE2	8.94451e-05	3.1773e-22	1.34757e-21	2.00067e-06	-2.27911e-21	2.38888e-05
CDC45	1.05343e-21	0.000195288	1.34757e-21	4.03135e-21	-2.27911e-21	-1.46597e-21
CDC5L	0.0302113	0.0405345	0.0741705	0.0692342	0.0484491	0.0290769
CDC7	-4.84764e-05	3.1773e-22	1.34757e-21	-8.11418e-06	-2.27911e-21	-1.46597e-21
CDC73	0.0183394	0.00585596	0.00773814	0.0234111	0.0271789	0.00800485
CDCA2	1.05343e-21	3.1773e-22	-0.00050744	-0.000192847	-0.00144671	0.00372962
CDCA3	1.05343e-21	3.1773e-22	0.00112555	0.000199251	-2.27911e-21	0.000197071
CDCA4	1.05343e-21	3.1773e-22	1.34757e-21	4.10336e-05	-2.27911e-21	-1.46597e-21
CDCA5	0.00104206	3.1773e-22	-0.00100531	0.00318117	-2.27911e-21	2.43933e-05
CDCA8	-0.00043235	3.1773e-22	1.34757e-21	0.000522488	2.20379e-05	-1.46597e-21
CDCP1	-0.00204561	-0.11057	-0.0342056	-0.0177681	-0.00207309	-0.00219562
CDH1	-0.243947	-0.300672	-0.423258	-0.417277	-0.339085	-0.34122
CDH11	0.0100257	0.00159881	0.00361088	0.00235466	0.00118682	0.00106782
CDH12	1.05343e-21	3.1773e-22	1.34757e-21	-1.91079e-05	-2.27911e-21	-1.46597e-21
CDH13	0.0526752	-0.0055456	0.0239777	0.0312143	0.0255141	-0.0051694
CDH24	1.05343e-21	-0.000677886	1.34757e-21	4.03135e-21	-2.27911e-21	-1.46597e-21
CDH26	1.05343e-21	-5.99405e-05	5.79387e-05	0.000163103	0.000828348	0.000512092
CDH3	0.0282468	0.00928006	0.00580775	-0.033074	0.00287794	-0.0341299
CDH5	0.0060966	-0.0013358	0.00611136	0.00673674	0.0142891	0.00204958
CDH6	1.05343e-21	3.1773e-22	1.34757e-21	1.55548e-05	-2.27911e-21	-1.46597e-21
CDH8	1.05343e-21	3.1773e-22	1.34757e-21	4.03135e-21	-9.98913e-05	-1.46597e-21
CDH9	1.05343e-21	3.1773e-22	1.34757e-21	3.42876e-06	-2.27911e-21	-1.46597e-21
CDIPT	0.118527	0.0509491	0.121509	0.0877106	0.121531	0.104106
CDK1	0.0231772	0.07926	0.0630544	0.200817	0.145341	0.0352632
CDK11B	1.05343e-21	3.1773e-22	1.34757e-21	5.86496e-06	-2.27911e-21	-1.46597e-21
CDK12	0.000546103	0.000701324	0.00141434	0.000646787	0.0001114	0.000708015
CDK13	-6.43219e-05	-2.70554e-05	1.34757e-21	4.77302e-05	0.000156613	2.88368e-05
CDK15	1.05343e-21	3.1773e-22	1.34757e-21	4.03135e-21	-2.27911e-21	-1.46597e-21
CDK16	1.05343e-21	3.1773e-22	1.34757e-21	4.03135e-21	-2.27911e-21	-1.46597e-21
CDK18	1.05343e-21	3.1773e-22	-0.00156958	4.03135e-21	-2.27911e-21	-1.46597e-21
CDK2	0.00327842	0.000399526	0.00223411	0.00480492	0.00283691	0.00215137
CDK20	-0.000256708	3.1773e-22	1.34757e-21	-0.000106248	-2.27911e-21	-1.46597e-21
CDK2AP1	0.00369437	-0.00106631	0.000207562	0.00333797	0.00720367	0.00285266
CDK4	0.0365287	0.00160509	-0.000690393	0.0229238	0.00394271	0.0113514
CDK5	0.0076897	-0.00449551	0.0538212	0.00848626	0.00807345	0.0074979
CDK5RAP1	1.05343e-21	3.1773e-22	1.34757e-21	2.80842e-05	3.31061e-05	-1.46597e-21
CDK5RAP2	-0.00185879	3.1773e-22	1.80197e-05	-0.00665339	-0.00267837	-0.00039197
CDK5RAP3	0.0390838	-0.0403261	-0.0129091	0.0524944	0.0392779	0.0491597
CDK6	0.000746224	0.00195475	0.00518863	0.00828458	0.00126238	0.00150916
CDK7	0.00327479	0.00130803	0.000516886	0.00110203	0.00530599	-0.000671905
CDK9	0.00730872	0.00104872	0.00985065	0.0077364	0.0020303	0.0024289
CDKAL1	1.05343e-21	-0.00121775	0.00149475	0.0019099	1.69913e-06	7.0573e-05
CDKL1	1.05343e-21	0.00020243	0.00164575	0.000151162	0.000561961	0.00229568
CDKL5	1.05343e-21	3.1773e-22	1.34757e-21	4.03135e-21	2.31615e-05	-1.46597e-21
CDKN1A	0.00907054	3.1773e-22	1.34757e-21	0.000537027	-0.000668339	-1.46597e-21
CDKN1B	0.000464624	-5.10584e-06	0.00446911	0.00151478	0.000839442	0.00912505
CDKN1C	1.05343e-21	3.1773e-22	1.34757e-21	1.29444e-05	-2.27911e-21	-1.46597e-21
CDKN2A	-0.00177776	-0.00623363	0.00345446	0.0309146	5.60918e-05	0.0107983
CDKN2AIP	0.000609537	-0.00267346	0.019382	0.00267728	0.00163745	0.00457696
CDKN2AIPN	1.05343e-21	3.1773e-22	1.34757e-21	0.000172374	-2.27911e-21	-7.54664e-06
CDKN2B	-0.000694545	3.1773e-22	-0.000346574	-0.000121712	-0.000271948	-0.000134659
CDR2	1.05343e-21	3.1773e-22	1.34757e-21	7.6265e-06	-2.27911e-21	-1.46597e-21
CDR2L	1.05343e-21	3.1773e-22	1.34757e-21	4.03135e-21	-2.27911e-21	-1.46597e-21
CDRT4	1.05343e-21	3.1773e-22	1.34757e-21	4.03135e-21	-1.00142e-05	-1.46597e-21
CDS2	0.0227769	0.00928178	0.0193483	0.0226562	0.0239129	0.0313353
CDSN	-0.00253489	0.0121942	2.46249e-05	-6.7308e-05	-0.000692566	-0.00120357
CDT1	0.000106653	3.1773e-22	-3.21618e-05	4.03135e-21	-2.27911e-21	-1.46597e-21
CDV3	0.104837	0.0327908	0.140705	0.127389	0.15039	0.0693691
CDYL	1.05343e-21	3.1773e-22	1.34757e-21	-6.14181e-06	-2.27911e-21	-1.46597e-21
CEACAM1	-0.000300243	-0.00206497	-0.000276363	-0.0052709	-0.00383095	-0.00884448
CEACAM5	-0.0920169	-0.00377031	-0.0712344	-0.0746354	-0.0103402	-0.0505685
CEACAM6	-0.0342497	0.0575937	0.0346656	-0.000790509	0.159422	-0.0127864
CEACAM7	-0.000416797	3.1773e-22	1.34757e-21	4.03135e-21	-0.000762206	-1.46597e-21
CEACAM8	0.0130446	0.0116401	0.0218598	0.021053	0.0239813	-0.00307767
CEBPB	1.05343e-21	3.1773e-22	1.34757e-21	0.000831244	-2.27911e-21	0.000698421
CEBPD	1.05343e-21	3.1773e-22	6.66079e-06	4.03135e-21	-2.27911e-21	-1.46597e-21
CEBPZ	0.00422275	0.00303289	0.0110312	0.00650038	0.00680404	0.002195
CECR1	0.000543557	0.00118552	1.34757e-21	0.00191275	0.000167884	-1.46597e-21
CECR5	0.0953128	0.027598	0.0351073	0.0360882	0.0588646	0.00341194
CEL	1.05343e-21	3.1773e-22	1.34757e-21	0.00149733	0.000112658	0.000488836
CELF1	0.000520381	-0.000660951	0.00366425	0.00354501	0.000249329	0.00241302
CELF2	0.00174676	3.1773e-22	1.34757e-21	0.000621478	0.00371527	-1.46597e-21
CELF4	1.05343e-21	3.1773e-22	1.34757e-21	-4.41972e-05	-2.27911e-21	-1.46597e-21
CELSR1	0.00116015	-0.000109918	0.000209192	0.000238533	0.000244742	0.000137606
CELSR2	0.000461407	-0.00116464	-0.000490997	0.000871579	-0.000708475	8.1016e-06
CENPA	1.05343e-21	3.1773e-22	1.34757e-21	-0.000132509	-2.27911e-21	-1.46597e-21
CENPB	0.0300582	0.000348864	0.00302102	0.00540836	0.000324374	0.00235593
CENPC1	0.000814192	0.000183514	5.04433e-05	0.000423959	0.00090225	0.00115419
CENPE	-0.00104122	-4.47908e-07	1.34757e-21	-0.00023613	-8.31238e-05	2.3779e-05
CENPF	0.000866216	-1.56186e-05	1.34757e-21	2.75022e-05	-2.27911e-21	3.73666e-05
CENPH	1.05343e-21	3.1773e-22	0.000965342	-0.000104236	-2.27911e-21	-1.46597e-21
CENPJ	0.00213238	0.00139589	0.00963358	0.00344078	0.00985739	0.000302155
CENPN	1.05343e-21	3.1773e-22	0.00425906	9.49384e-05	-1.8142e-05	0.000873755
CENPQ	1.05343e-21	3.1773e-22	1.34757e-21	0.000118509	-2.27911e-21	-1.46597e-21
CENPV	1.05343e-21	3.1773e-22	1.34757e-21	-0.000106084	-2.27911e-21	7.57372e-05
CEP104	-1.07495e-05	0.000113232	6.0985e-05	0.00012348	0.000230027	1.16722e-05
CEP112	0.000571749	3.1773e-22	1.34757e-21	2.33516e-05	-5.66425e-05	-0.00100654
CEP128	3.11675e-05	3.1773e-22	1.34757e-21	4.03135e-21	-4.45196e-06	-1.46597e-21
CEP135	1.05343e-21	3.1773e-22	1.34757e-21	4.03135e-21	-2.27911e-21	-1.46597e-21
CEP170	1.05343e-21	0.000475237	9.7173e-05	0.000389205	0.000313371	0.000988676
CEP170B	0.000420516	-0.000336682	4.14751e-05	-0.0127049	-0.000732116	0.000706066
CEP192	2.21718e-05	3.1773e-22	0.000175619	4.03135e-21	-2.27911e-21	-5.30442e-05
CEP250	0.00030814	-4.13555e-06	-0.000441938	0.000271806	-1.22239e-05	0.000711989
CEP290	0.000138894	-9.13843e-05	-2.89048e-05	0.000124754	0.000153674	0.000320618
CEP350	-0.0281059	-0.000564505	1.34757e-21	3.24345e-05	-5.511e-05	-1.46597e-21
CEP41	1.05343e-21	3.1773e-22	1.34757e-21	2.36623e-05	-1.9511e-06	-1.46597e-21
CEP44	1.05343e-21	3.1773e-22	0.000810459	1.35536e-05	-3.02834e-05	0.000180793
CEP55	1.05343e-21	3.1773e-22	1.34757e-21	4.03135e-21	-7.32876e-06	-1.46597e-21
CEP57L1	1.05343e-21	3.1773e-22	1.34757e-21	4.03135e-21	-3.54648e-06	-1.46597e-21
CEP63	1.05343e-21	-0.000483184	1.34757e-21	-4.42793e-05	-0.000205672	0.000281225
CEP76	1.05343e-21	3.1773e-22	-1.43755e-05	4.15169e-06	-2.27911e-21	-1.46597e-21
CEP89	0.00101423	2.45038e-06	4.66486e-05	-9.24184e-05	1.15655e-05	-0.000141778
CEP97	1.05343e-21	3.1773e-22	1.34757e-21	-4.87794e-06	-4.87898e-05	-1.46597e-21
CEPT1	0.0244931	0.0182196	0.0109981	0.0244744	0.0409042	0.00887273
CERCAM	1.05343e-21	3.1773e-22	1.34757e-21	4.03135e-21	-2.27911e-21	-1.46597e-21
CERKL	1.05343e-21	3.1773e-22	1.34757e-21	-6.78678e-05	-2.27911e-21	-1.46597e-21
CERS2	0.00742009	-0.00123844	0.0373019	0.011544	0.00669683	0.00570687
CERS3	-0.00469772	0.00204815	-0.0196114	-0.00921939	-0.00846624	-0.0119766
CERS4	0.000180439	-0.00016794	1.34757e-21	-0.000269988	-6.59588e-05	-1.46597e-21
CES1	4.17892	-0.0847145	2.06619	0.124866	3.23196	0.476907
CES2	-0.537214	-0.263189	-0.368095	-0.367924	-0.313965	-0.291845
CETN2	0.021923	0.00776234	0.0210499	0.021068	0.0347182	0.00622723
CETP	1.05343e-21	-0.000778514	1.34757e-21	0.000935485	-2.27911e-21	1.08914e-05
CFB	0.00274127	-0.00729229	0.0109964	0.0166842	7.43608e-05	0.0212844
CFD	0.00818814	-0.00219648	-0.00149484	-0.00273979	0.00288421	0.00378803
CFDP1	0.00504863	0.0175812	0.0136117	0.0141774	0.00235094	0.0099864
CFH	0.00744585	0.0139781	0.00766268	0.0135751	0.0165187	0.0114461
CFHR5	1.05343e-21	3.1773e-22	1.34757e-21	4.03135e-21	-2.27911e-21	-1.46597e-21
CFI	0.00260163	-0.000947513	0.00361418	0.0170957	0.00788634	-0.00347699
CFL1	25.681	13.7577	12.7125	17.3553	21.7036	7.71739
CFL2	0.320846	0.0942231	0.147109	0.117175	0.100743	0.0538638
CGGBP1	-0.000592589	0.000350179	0.00468125	0.00251487	6.72004e-05	0.00104127
CGN	-0.00194724	0.000228052	-0.000936851	-0.000409491	-0.00105395	-0.000910174
CGNL1	-4.84134e-05	-0.00255726	-2.22647e-05	-6.0395e-05	-0.000130424	-1.46597e-21
CGREF1	1.05343e-21	3.1773e-22	1.34757e-21	-9.53312e-05	0.00013261	2.0702e-07
CHAC2	1.05343e-21	3.1773e-22	1.34757e-21	6.88232e-05	-2.27911e-21	-1.46597e-21
CHADL	1.05343e-21	0.000441713	-8.11664e-05	0.00218958	0.000153159	-1.46597e-21
CHAF1A	5.47385e-05	3.1773e-22	0.000511159	0.00155641	3.59986e-06	0.00066514
CHAF1B	1.05343e-21	-7.65362e-05	1.34757e-21	0.000115033	0.0002182	-1.46597e-21
CHAMP1	0.000907693	0.000670897	0.0105241	0.00663846	0.00134039	0.00511397
CHAT	0.000119643	3.1773e-22	1.34757e-21	4.03135e-21	-2.27911e-21	-1.46597e-21
CHCHD1	0.00167782	0.00107097	-3.41645e-05	0.00417206	0.00158614	-0.00121377
CHCHD2	1.05343e-21	0.000181087	1.34757e-21	0.00942398	-0.000713537	-1.46597e-21
CHCHD3	0.0946699	-0.0253212	0.03739	0.027332	0.102487	0.0365076
CHCHD4	0.000176424	3.1773e-22	0.000176158	-0.000390834	0.00168317	0.00029687
CHCHD5	1.05343e-21	3.1773e-22	1.34757e-21	4.03135e-21	-0.00169678	-1.46597e-21
CHCHD6	0.00495346	3.1773e-22	-3.16176e-05	0.00247099	0.00245036	-1.46597e-21
CHD2	0.000144289	0.000408186	-4.15487e-05	0.000408395	0.000532333	1.1535e-05
CHD3	0.00264269	3.1773e-22	0.00183647	0.00056786	-2.16427e-05	-1.46597e-21
CHD4	0.0187833	0.00611861	0.00447618	0.00623743	0.0128674	0.00474448
CHD5	1.05343e-21	3.1773e-22	1.00041e-05	4.03135e-21	-2.27911e-21	-1.46597e-21
CHD7	1.05343e-21	3.1773e-22	1.34757e-21	8.71061e-08	-5.62134e-06	-1.46597e-21
CHD8	1.05343e-21	3.1773e-22	1.34757e-21	1.98069e-07	7.37536e-05	1.88862e-05
CHDH	1.05343e-21	0.0108749	1.34757e-21	0.00387256	0.00640669	0.00111315
CHEK1	0.000335129	3.1773e-22	1.34757e-21	0.000352861	-0.00011587	-0.000467267
CHEK2	1.05343e-21	0.000485724	-1.23535e-05	7.26459e-05	-2.27911e-21	-1.46597e-21
CHERP	0.0286329	0.013152	0.0257865	0.0250007	0.0213454	0.0136019
CHI3L1	1.05343e-21	3.1773e-22	1.34757e-21	-0.000146866	-2.27911e-21	-1.46597e-21
CHI3L2	1.05343e-21	3.1773e-22	1.34757e-21	-2.628e-05	-2.27911e-21	-1.46597e-21
CHIA	1.05343e-21	3.1773e-22	0.00332685	4.03135e-21	-2.27911e-21	-1.46597e-21
CHIC2	1.05343e-21	3.46075e-05	0.00110319	0.000300205	0.00102554	0.0005943
CHID1	0.13898	0.0764841	0.127283	0.0682508	0.119629	0.116208
CHIT1	5.92907e-05	3.1773e-22	1.34757e-21	7.56891e-05	1.72857e-06	-1.46597e-21
CHKB	0.00219585	0.00078475	1.34757e-21	0.00246212	0.00114515	0.0039799
CHL1	0.00212946	0.000194021	-0.00014198	0.00013984	4.30092e-05	-0.000381484
CHM	-0.000125231	0.000803733	0.00992513	0.0052275	0.00653609	0.00299953
CHMP1A	-0.000327312	3.1773e-22	1.34757e-21	-2.30532e-05	0.00270951	-0.000276563
CHMP1B	1.05343e-21	0.000226514	1.34757e-21	0.00178777	0.0011827	0.00111554
CHMP2A	-0.011717	0.0375606	-0.0279974	-0.0204723	0.177107	-0.0517111
CHMP2B	-0.00298067	-0.000206889	-0.000813165	-0.000217989	0.0011	-0.00029005
CHMP3	0.015549	3.1773e-22	1.34757e-21	4.03135e-21	-2.27911e-21	-1.46597e-21
CHMP4A	0.0124738	0.0294134	0.445168	0.0835477	-0.00704218	0.0650955
CHMP4B	0.00217767	-0.00871755	-0.0113241	-0.00517144	0.00424901	-0.0114731
CHMP4C	6.8547e-05	-0.00606875	-0.00250552	-0.00378514	-0.00448309	-0.00203247
CHMP5	5.514e-05	3.1773e-22	0.00164295	0.00110466	0.00344921	-2.41036e-05
CHMP6	0.000217128	-0.00238541	-0.0038668	0.00805203	-0.00109667	-0.00364924
CHMP7	0.0126126	0.00221104	0.00674177	0.00495788	0.0129674	0.00459355
CHORDC1	0.00257951	0.0014125	0.00676884	0.00995519	0.00102974	0.00236512
CHP1	0.275523	-0.0322305	-0.0313209	0.11885	0.152209	0.012864
CHP2	1.05343e-21	3.1773e-22	1.34757e-21	-4.78462e-05	-2.27911e-21	-1.46597e-21
CHPF	0.00146863	3.1773e-22	0.000347676	6.62644e-05	-2.27911e-21	0.00034852
CHPF2	-7.38221e-05	3.1773e-22	1.34757e-21	4.03135e-21	-2.27911e-21	-1.46597e-21
CHPT1	1.05343e-21	3.1773e-22	1.34757e-21	4.03135e-21	-9.65088e-05	-1.46597e-21
CHRAC1	0.00863028	0.00462363	0.00652057	0.00256625	0.0139324	0.00271302
CHRNB4	1.05343e-21	-0.00120456	-0.000264351	-0.000156999	-0.000149742	-1.46597e-21
CHST11	-0.00326634	-0.00200803	0.00156037	-0.00158236	0.0151123	0.00363637
CHST12	1.05343e-21	3.1773e-22	1.34757e-21	4.03135e-21	-2.27911e-21	0.000667113
CHST14	0.00150997	0.000522253	0.000918347	0.00128198	0.000257288	0.000674152
CHST2	1.05343e-21	3.1773e-22	1.34757e-21	2.06641e-05	-2.27911e-21	-1.46597e-21
CHST3	1.05343e-21	3.1773e-22	1.34757e-21	5.11263e-06	-0.000119112	-1.46597e-21
CHSY1	1.05343e-21	3.1773e-22	1.34757e-21	1.67893e-05	-2.27911e-21	-1.46597e-21
CHTF18	0.000286114	0.00208673	1.92632e-06	0.00151488	0.00343132	0.000535032
CHTOP	0.00795215	0.0133051	0.0372224	0.0341015	0.0463112	0.0253033
CHUK	0.000393401	0.000628849	0.00109628	0.000361495	0.00106514	0.000701653
CHURC1	-0.00075006	-0.000630922	-0.000900786	0.000348338	0.000334749	-0.00250167
CIAO1	1.05343e-21	0.000226219	0.000463713	0.000972954	0.00120995	0.000486769
CIAPIN1	0.00716534	-0.0129658	-0.00439005	0.00259611	-0.0105383	-0.00390318
CIB1	0.00259176	0.00801024	0.0332148	0.00402499	0.0253127	0.00746964
CIB2	1.05343e-21	3.1773e-22	1.34757e-21	-5.04882e-05	-2.27911e-21	-1.46597e-21
CIB3	1.05343e-21	3.1773e-22	1.34757e-21	4.03135e-21	-2.27911e-21	0.000253866
CIC	1.05343e-21	3.1773e-22	1.34757e-21	4.03135e-21	-2.27911e-21	-1.46597e-21
CIITA	1.05343e-21	3.1773e-22	1.34757e-21	-5.45107e-06	-8.83537e-05	-1.46597e-21
CILP	0.00408077	0.000791425	-0.00045259	0.000224539	0.00577449	0.00189082
CILP2	0.000210933	3.1773e-22	1.34757e-21	4.03135e-21	-2.27911e-21	-1.46597e-21
CINP	1.05343e-21	3.1773e-22	1.34757e-21	5.83111e-07	-2.27911e-21	-1.46597e-21
CIR1	1.05343e-21	3.1773e-22	1.34757e-21	2.50866e-05	-2.27911e-21	-1.46597e-21
CIRBP	1.44524	0.0721778	0.376477	0.757575	1.07513	0.350996
CIRH1A	0.00499405	-0.000639304	0.00323175	0.00548392	0.00965794	0.000753399
CISD1	0.0373647	-0.0360285	0.160248	0.104555	-0.0205553	0.02335
CISD2	0.159439	0.101464	0.228292	0.295175	0.116887	0.148757
CIT	1.05343e-21	3.1773e-22	1.34757e-21	3.08134e-05	-0.000112992	-1.46597e-21
CIZ1	3.68019e-05	0.000102159	-9.78049e-05	0.000199083	7.92019e-06	0.000133433
CKAP2	1.05343e-21	3.1773e-22	1.34757e-21	4.03135e-21	6.13296e-05	-1.46597e-21
CKAP2L	1.05343e-21	3.1773e-22	1.34757e-21	4.03135e-21	-2.27911e-21	-0.00015551
CKAP4	0.0903083	-0.051071	0.39708	0.451499	-0.132614	0.29264
CKAP5	0.00806211	0.00789672	0.0270779	0.0158374	0.0129752	0.00525097
CKB	2.6023	0.481444	-1.17959	0.37482	0.529996	0.817574
CKM	-6.33933e-05	3.1773e-22	-0.00746506	-0.000123335	-0.000215675	3.69506e-05
CKMT2	-0.000469799	3.1773e-22	-0.00721376	-9.61745e-05	4.21252e-05	-1.46597e-21
CKS1B	1.05343e-21	-0.000672059	1.34757e-21	4.03135e-21	0.000602997	-1.46597e-21
CLASP1	0.0147458	0.00546248	0.00887897	0.0160336	0.0223033	0.00122089
CLASP2	0.000531538	-0.000520707	0.00380788	0.00249335	0.00115926	0.00213198
CLC	-0.018197	0.319874	0.0234525	0.209693	0.0328804	0.0770478
CLCA2	0.00850607	-0.0273435	-0.0136355	0.00382293	-0.0200002	-0.021391
CLCA4	-1.30012	-0.645058	-1.06001	-1.3034	-1.18241	-0.602062
CLCC1	6.9102e-05	2.06185e-05	0.00043847	0.000213514	2.70729e-05	0.000140558
CLCN3	-0.00434277	-0.0215497	-0.00393481	-0.00638481	-0.000339063	-1.46597e-21
CLCN5	1.05343e-21	3.1773e-22	1.34757e-21	9.64181e-05	-8.33877e-05	-1.46597e-21
CLCN7	1.05343e-21	3.1773e-22	0.000135266	-1.97914e-05	0.000249479	0.000418398
CLDN1	0.022007	-0.00682402	0.0100689	0.0153564	0.00446699	0.00268296
CLDN12	1.05343e-21	3.1773e-22	1.34757e-21	0.000130409	-2.27911e-21	-1.46597e-21
CLDN17	1.05343e-21	3.1773e-22	1.34757e-21	4.03135e-21	-4.93905e-05	-1.46597e-21
CLDN7	-0.00505805	0.00149787	-0.00322619	0.00602991	0.0095991	-0.0136908
CLDND1	-0.000566643	-0.00115239	0.0004895	0.00376078	-0.000623224	-0.00010883
CLEC11A	1.05343e-21	3.1773e-22	1.34757e-21	4.03135e-21	0.000522157	-1.46597e-21
CLEC16A	0.0001675	3.1773e-22	1.34757e-21	0.00011731	-2.27911e-21	-1.46597e-21
CLEC1A	1.05343e-21	3.1773e-22	-0.000263326	4.03135e-21	-2.27911e-21	-1.46597e-21
CLEC2B	1.05343e-21	3.1773e-22	1.34757e-21	0.000529039	0.0023693	0.00057143
CLEC3B	0.0736372	0.0021383	0.0450431	0.0607307	0.0510346	0.0713315
CLGN	1.05343e-21	3.1773e-22	1.34757e-21	4.03135e-21	0.000259117	-1.46597e-21
CLIC1	0.653868	-0.501848	0.0816903	-0.396214	0.380067	0.315886
CLIC2	0.0262798	0.0245061	0.0584492	0.0596215	0.0717334	0.0746944
CLIC3	-0.61154	-0.467165	-0.416197	-0.539703	-0.506725	-0.356011
CLIC4	0.407481	0.101929	0.233902	0.260723	0.265173	0.22487
CLIC6	0.0502924	0.00801214	0.000783989	0.00178292	0.00277227	0.00158128
CLINT1	-0.00477652	-0.00130205	0.0243016	0.0391528	-0.00642697	-0.0371971
CLIP1	-0.00955866	-0.0187414	-0.00347568	-0.00444431	-0.00825065	-0.00927245
CLIP2	0.00370631	0.000818038	0.00479799	0.00583259	0.00280836	0.00146926
CLK3	0.00555787	0.000886456	0.00357757	0.00317209	0.00736894	0.00199334
CLMN	1.05343e-21	-8.03308e-05	1.34757e-21	4.03135e-21	-2.27911e-21	-1.46597e-21
CLN3	0.000792267	0.000226072	0.00259199	0.0005295	0.00257946	0.00374215
CLN5	1.05343e-21	0.000352085	1.34757e-21	0.000745312	-6.13627e-06	0.000806107
CLN6	0.00244419	4.92385e-06	0.00139587	0.000880197	-2.27911e-21	0.00186223
CLNS1A	0.801441	-0.27551	0.549508	0.493555	0.451741	0.0412968
CLP1	1.05343e-21	3.1773e-22	1.34757e-21	3.72881e-05	-2.22816e-06	-1.46597e-21
CLPB	0.00186916	0.003073	0.00950796	0.00830681	0.000652369	0.00461722
CLPP	0.0261348	0.00181773	0.0781076	0.103301	0.0971692	0.0510778
CLPTM1	0.000659994	-3.15476e-05	0.0101183	0.0239259	0.0150278	7.52581e-05
CLPTM1L	0.00971322	0.0124506	0.0107798	0.0126272	0.00965408	0.0126831
CLPX	0.0048767	-0.00259893	0.0154751	0.00554686	0.00234342	0.00246729
CLSTN1	0.00955516	0.00154321	-0.00042287	0.00396579	0.00572966	0.000908318
CLTA	0.166488	0.0404941	0.0935944	0.123348	0.120942	0.0798711
CLTB	-0.0194165	-0.0102311	-0.0243622	-0.0148552	-0.00672153	-0.00352468
CLTC	0.374117	0.0136449	0.205868	0.168103	0.350268	0.128514
CLU	1.97916	0.553941	0.388374	0.574527	1.38494	0.171823
CLUH	0.0107725	-0.0140436	0.000394617	-0.000828207	-0.0143825	-0.0128558
CLVS2	1.05343e-21	3.1773e-22	1.34757e-21	4.03135e-21	-2.27911e-21	-1.46597e-21
CLYBL	0.00473413	-0.00185946	0.0024522	0.00264225	0.00113566	0.00154415
CMA1	0.00664538	0.00534767	-0.00531442	0.0540393	0.0456727	0.0125913
CMAS	-0.0179118	-0.012659	-0.00463795	-0.0061499	0.00237971	-0.00616746
CMBL	0.00519922	0.00403288	0.0156938	0.00592244	0.0282134	0.0187885
CMC1	1.05343e-21	3.1773e-22	1.34757e-21	4.03135e-21	-2.27911e-21	-1.46597e-21
CMC4	0.000130339	3.1773e-22	1.34757e-21	4.03135e-21	-2.27911e-21	0.00124713
CMIP	0.000732576	-0.000832307	0.0130246	-0.000163175	-0.00469907	0.00653058
CMPK1	-0.350481	-0.355458	-0.252912	-0.394863	-0.0654975	-0.151087
CMPK2	0.00427299	0.00640099	0.00515311	0.0112693	0.010336	0.032015
CMSS1	0.00117005	3.1773e-22	-5.90502e-05	0.000996818	-5.57207e-05	-0.000133411
CMTM6	0.0014926	0.00277265	1.34757e-21	0.00829804	0.000373517	0.00287462
CMYA5	1.05343e-21	3.1773e-22	1.34757e-21	1.75044e-06	1.01018e-05	-3.60027e-05
CNBP	1.05343e-21	3.1773e-22	1.34757e-21	0.000184542	-2.27911e-21	-1.46597e-21
CNDP1	1.05343e-21	3.1773e-22	1.34757e-21	4.03135e-21	7.61067e-05	-1.46597e-21
CNDP2	0.243185	0.0706574	0.998703	0.455782	0.790831	0.582822
CNEP1R1	-0.000124453	3.1773e-22	0.000100214	1.45528e-06	4.62761e-05	-1.46597e-21
CNIH4	0.000961936	0.0339294	0.0886992	0.0292604	0.0157544	0.00776786
CNKSR1	-0.00011291	-0.00165071	-0.00220159	-0.00134715	-0.00154101	-0.000285972
CNKSR3	0.00081448	-6.4611e-05	1.34757e-21	4.03135e-21	-2.27911e-21	-1.46597e-21
CNN1	0.276309	0.492208	0.384081	0.288357	0.540699	0.511718
CNN2	0.0756532	0.110477	0.147322	0.254584	0.18987	0.126679
CNN3	-0.0558929	-0.0161058	0.0172582	0.00905521	0.0389992	0.0240292
CNNM1	1.05343e-21	3.1773e-22	1.34757e-21	0.000284508	-2.27911e-21	-1.46597e-21
CNNM2	0.000724842	1.39565e-05	-7.13089e-05	-0.000197458	-2.27911e-21	-1.46597e-21
CNNM3	0.000607017	3.1773e-22	-7.24203e-05	0.000597796	0.000832463	3.65503e-05
CNNM4	0.000354986	3.1773e-22	0.000301336	0.000172634	5.24899e-05	0.000249505
CNOT1	0.0122501	0.00681229	0.0263316	0.0160345	0.0101881	0.0107714
CNOT10	0.00219272	-0.000275356	0.00243312	0.00228421	0.00146633	0.000294774
CNOT11	0.00164287	0.00479064	0.00151864	0.00856057	0.00246925	0.00308737
CNOT2	0.00320643	0.00601584	0.00946282	0.00790954	0.00410724	0.0080925
CNOT3	0.00812138	0.00517343	0.0297018	0.0245907	0.0167966	0.0147393
CNOT4	0.000152696	-7.42788e-05	0.00482165	-0.000149771	0.001168	0.000904991
CNOT6L	0.000279728	-2.08807e-05	0.000732387	0.000737296	-9.5201e-05	0.000107384
CNOT7	0.000985422	-0.000685282	0.0157371	0.00640002	0.0168572	0.000968977
CNOT8	1.05343e-21	3.1773e-22	1.34757e-21	1.8087e-06	-3.1325e-06	-1.46597e-21
CNP	0.000209746	-0.0168115	0.0206254	0.0114655	6.12062e-06	0.0242982
CNPY2	0.0836444	0.0464291	0.052456	0.0783553	0.163631	0.290953
CNPY3	0.00215927	0.000101946	0.0111219	0.00716158	0.00572064	0.00722787
CNPY4	0.0479921	0.0251813	0.0266959	0.0528591	0.0414537	0.0343743
CNRIP1	0.000403198	0.0143819	0.00756438	0.0323741	-7.94996e-05	0.014467
CNST	1.05343e-21	1.39297e-05	0.000155776	0.000375434	-2.35749e-05	0.000103825
CNTD2	0.000263739	5.35712e-05	-4.16732e-05	4.03135e-21	-2.04631e-05	-9.02883e-06
CNTLN	0.000821025	-0.000134879	0.00124275	2.55221e-05	-6.55691e-05	0.00124365
CNTN1	0.00105385	0.000860593	0.0107544	0.00152867	0.000409805	0.000100798
CNTN5	1.05343e-21	-0.000428296	1.34757e-21	3.37883e-05	-2.27911e-21	-1.46597e-21
CNTN6	1.05343e-21	3.1773e-22	1.34757e-21	4.03135e-21	-2.27911e-21	-2.92711e-05
CNTNAP1	1.05343e-21	3.1773e-22	1.34757e-21	2.34132e-06	2.00317e-05	-1.46597e-21
CNTNAP4	1.05343e-21	3.1773e-22	-0.00019524	4.03135e-21	-2.27911e-21	-1.46597e-21
CNTRL	1.05343e-21	3.1773e-22	0.000331006	8.38083e-05	0.00211959	4.17764e-05
COA3	0.15325	0.0302414	0.0113305	0.0245149	0.00590286	0.0244003
COA4	0.000475472	-3.96116e-05	-0.000150042	2.6452e-05	-3.05881e-06	-1.46597e-21
COA6	0.0311688	0.00468336	0.0296552	0.00420928	-0.00571832	0.00228855
COASY	-0.0762295	-0.100348	-0.094902	-0.0766655	-0.0375408	-0.0601247
COBL	-0.000640908	3.1773e-22	1.34757e-21	3.97947e-05	-2.27911e-21	-1.46597e-21
COBLL1	-0.00106004	-0.00168829	-0.00133657	-0.00196552	-0.00387378	-0.00264039
COCH	1.05343e-21	3.1773e-22	1.34757e-21	0.000512201	-2.27911e-21	-1.46597e-21
COG1	0.000988453	0.00302475	-0.00578346	0.00702291	-0.00165258	0.00405084
COG2	0.00237086	0.00163438	0.00684625	0.00310936	0.00601121	0.00152088
COG3	0.00136811	0.0023725	0.00577084	0.00268242	0.0040431	0.00324519
COG4	0.00257422	0.000687595	0.00588869	0.00275947	0.000280867	0.00234155
COG5	0.00107242	0.00578725	0.00306962	0.00414529	0.000473739	3.82764e-05
COG6	0.000497548	0.00863705	0.00209882	0.00551896	0.00132062	0.00301813
COG7	0.0101962	0.04495	-0.0155834	0.0294532	0.00984631	0.00995902
COG8	0.0096537	0.00261661	0.00173237	0.00158284	-0.0015051	0.00259046
COIL	0.060264	0.0117035	0.05398	0.0330346	0.0257531	0.023865
COL10A1	1.05343e-21	3.1773e-22	1.34757e-21	0.000452273	-2.27911e-21	0.000354656
COL11A1	-1.32035e-05	0.000276704	-0.000451823	-4.11657e-05	8.8177e-05	3.11177e-05
COL12A1	0.212808	0.0894069	0.0965564	0.149467	0.125166	0.165659
COL14A1	0.150825	0.168476	-0.139327	0.181123	0.407015	0.840243
COL15A1	0.0846101	0.0223821	0.0173891	0.0495258	0.0141568	0.0437343
COL17A1	0.0194173	0.0232905	0.0120082	0.0193396	0.00284107	-0.00329096
COL18A1	0.0234108	0.00883399	0.0469613	0.0728465	0.0339747	0.0289209
COL19A1	1.05343e-21	-0.00840872	0.000519199	-4.26626e-05	1.35155e-05	-1.46597e-21
COL1A1	0.0546492	0.190639	-1.15967	-1.11022	1.2621	-0.620124
COL1A2	0.595946	-0.135015	-0.23082	-0.440253	0.128175	-0.383268
COL21A1	-0.000364956	-0.000630798	-0.0028047	-0.00341125	-0.00149427	-0.000699963
COL27A1	-0.000409641	-0.000417209	0.00272755	0.00043739	0.00114132	0.0024282
COL28A1	-0.000481145	-9.82199e-06	-7.49677e-05	-7.92455e-05	9.41242e-05	-0.000369461
COL2A1	0.00396056	1.55252e-05	0.000744184	0.000970229	0.000873845	0.0696331
COL3A1	-0.000594778	0.0194615	-0.00838446	-0.00266739	0.0112645	0.00495665
COL4A1	0.00277608	0.141705	-0.00525323	0.0718918	0.0212759	0.0847754
COL4A2	0.00748338	0.00876259	0.00354185	0.0302185	0.0127052	0.0115046
COL4A3BP	-0.00303956	-0.0118117	0.00552166	0.00941519	0.00420564	-0.00433246
COL4A4	1.05343e-21	3.1773e-22	1.34757e-21	1.04416e-05	1.61227e-06	-1.46597e-21
COL4A6	-4.3616e-05	3.1773e-22	1.34757e-21	4.03135e-21	-2.27911e-21	-1.46597e-21
COL5A1	1.61786e-05	0.00321779	0.00206112	0.00307432	0.00244203	0.0061843
COL5A2	0.00126009	-5.01878e-05	0.00269704	0.00427826	0.001447	-0.000129024
COL5A3	1.05343e-21	3.1773e-22	1.34757e-21	1.34598e-05	7.12407e-05	4.64091e-05
COL6A1	2.41306	0.314146	-0.942557	-0.130217	1.23511	1.80547
COL6A2	7.09361	0.431735	-1.07236	0.828547	3.56426	-0.909277
COL6A3	5.71613	1.30033	-1.24079	1.95672	3.37025	1.83257
COL6A5	-0.00405559	-0.0215099	-0.0158757	-0.0189059	-0.00847875	-0.0310297
COL6A6	-0.00302449	-0.00253423	-0.00145064	-0.00572592	-0.00142397	-0.00140767
COL7A1	0.0781661	-0.109133	-0.011397	0.0366044	-0.00192547	-0.0593508
COL8A1	0.0178267	0.0160301	0.0142209	0.00973698	0.0157236	0.0103406
COL8A2	1.05343e-21	3.1773e-22	1.34757e-21	4.58738e-05	1.60927e-05	1.9708e-05
COL9A2	1.05343e-21	3.1773e-22	1.34757e-21	4.03135e-21	0.000333254	-1.46597e-21
COLEC10	0.000678932	3.1773e-22	0.00645454	0.000243115	0.00109272	0.00038944
COLEC11	1.9907e-05	3.1773e-22	1.34757e-21	4.03135e-21	-2.27911e-21	-1.46597e-21
COLGALT1	0.0895917	0.0183923	0.0630768	0.0528	0.0385677	0.035369
COMMD1	0.00160945	0.000131381	-6.32527e-05	0.00057092	-0.00065808	0.000752125
COMMD10	0.00406534	0.00219197	0.0725674	0.00635542	0.00805992	0.00200789
COMMD2	0.0258124	-0.0110408	0.00351341	0.0426103	0.000832072	0.00491523
COMMD3	0.0578934	0.00794086	0.00461316	0.0365715	0.0138825	0.0159838
COMMD4	0.00834439	-0.00285053	-0.00192789	0.00471901	0.00493429	0.000609088
COMMD5	0.00676299	0.00933446	-0.00230579	0.00568661	0.00576999	0.00342035
COMMD6	-0.00111307	0.000295715	-0.0125565	0.0020181	0.000853099	-0.000135176
COMMD7	0.00248665	6.54759e-05	-0.000104674	0.000645606	1.08984e-05	0.000110722
COMMD8	0.00188885	-0.0103901	0.0191744	0.0176297	-0.00710607	0.0113425
COMMD9	0.00278204	0.00303738	0.0113477	0.00946043	0.00361591	-0.000804364
COMP	0.000165654	2.24563e-05	1.08695e-06	6.51981e-05	-2.27911e-21	-4.6049e-05
COMT	0.411144	0.0836439	-0.0815617	-0.0189507	-0.00821951	-0.0509491
COMTD1	0.0018708	-0.00132933	-0.00120416	0.0120819	0.0119097	-0.00369226
COPA	0.128114	0.000223656	0.0987342	0.0846207	0.0967231	0.0858038
COPB1	0.157911	0.0353544	0.158062	0.14439	0.140489	0.122704
COPB2	0.0697453	0.0287572	0.0765567	0.0507779	0.0719316	0.0250503
COPE	0.172081	-0.0256214	0.254054	0.152647	0.191376	0.0875805
COPG1	0.0625778	0.00737955	0.0558653	0.0491225	0.0608227	0.0546507
COPG2	-0.00218796	0.0025472	0.00300046	0.00497017	0.00302336	0.00345114
COPRS	1.05343e-21	3.1773e-22	1.34757e-21	4.03135e-21	-2.27911e-21	-1.46597e-21
COPS2	0.0266805	0.00287743	0.00891568	0.0303372	0.00924141	-0.00287214
COPS3	0.0221216	0.00748561	0.0271613	0.0561655	0.0143928	0.0118975
COPS4	0.168323	0.0685988	0.0432476	0.108523	0.146812	0.0185341
COPS5	0.0122817	0.00174693	0.0197614	0.0214213	0.0118205	0.00665321
COPS6	0.00849217	-0.00254585	0.000497748	0.0049593	-0.00480588	0.00448943
COPS7A	0.0166234	-0.00383385	0.00831753	0.00783886	-0.0133318	0.00143744
COPS7B	0.0016788	-0.000132945	-0.00468677	0.00193569	-0.000719869	0.00654531
COPS8	0.0112785	0.00122383	-0.0113762	0.0632708	0.0139524	0.0602434
COPZ1	0.0903642	0.0160243	0.12378	0.114099	0.096852	0.145887
COPZ2	5.65411e-05	3.1773e-22	1.34757e-21	4.68653e-06	-2.27911e-21	-1.46597e-21
COQ10B	0.000253511	-0.000752394	0.00186474	0.000213509	-8.33358e-05	0.000352662
COQ3	0.0128829	-0.00602791	-0.00104348	0.00672667	-0.000927292	-0.00133577
COQ5	-0.000854058	0.00510128	0.00792936	0.0129495	0.00396458	0.00190211
COQ6	0.000193106	-8.14763e-05	0.00270669	0.00220799	-0.000356783	0.000566249
COQ7	1.05343e-21	-0.000136115	0.00485539	4.03135e-21	-2.27911e-21	-1.46597e-21
COQ9	0.00423888	0.00303677	0.00780133	0.00687174	0.00739202	0.00294703
CORO1A	0.283196	0.161861	0.65626	0.91505	0.921544	1.34872
CORO1B	0.149549	0.037153	0.0269374	0.0465378	0.0286641	0.0343744
CORO1C	0.0186914	0.0537977	0.0568525	0.211733	0.0460654	0.0953615
CORO2A	0.00229736	0.0010519	0.00405492	0.00473817	0.00359569	0.000415553
COTL1	0.564528	0.16261	0.135619	0.509431	0.603985	0.408713
COX1	1.05343e-21	3.1773e-22	1.34757e-21	4.03135e-21	-2.27911e-21	-1.46597e-21
COX15	1.05343e-21	3.1773e-22	1.34757e-21	4.69929e-05	-2.27911e-21	-1.46597e-21
COX17	1.05343e-21	3.1773e-22	1.34757e-21	-1.9474e-06	-2.27911e-21	-1.46597e-21
COX19	1.05343e-21	3.1773e-22	-0.000565005	4.03135e-21	-2.27911e-21	-1.46597e-21
COX2	0.588032	0.676257	-0.190088	-0.558873	0.617115	-0.066834
COX20	0.00503154	-0.000945004	0.000962283	0.000946019	-0.000237297	0.00036719
COX3	-0.000217194	-0.000493898	1.34757e-21	4.03135e-21	5.94199e-05	-1.46597e-21
COX4I1	0.0207627	0.0667025	0.369713	0.13607	0.119553	0.0950755
COX5A	0.0379114	0.0926833	0.073437	0.206209	0.219005	0.0702305
COX5B	0.405828	-0.00547789	0.264273	0.0702311	-0.259724	0.0924629
COX6A1	-0.00115545	3.1773e-22	-0.00954344	-0.00045598	-0.000892029	-8.87957e-05
COX6B1	1.05343e-21	-0.000280315	-0.000783618	-8.75333e-05	-0.000362297	-0.000304784
COX6C	-0.00777127	0.0172788	-0.0119616	0.00877669	0.0444113	-0.00163775
COX7A1	0.0331397	0.00599625	0.0121824	0.00745474	-0.000378164	0.0234293
COX7A2	0.624929	-0.346552	-0.17273	-0.167503	0.421396	0.104971
COX7A2L	-0.00223014	-4.93507e-05	0.0216815	0.0035229	0.00291364	-0.00168406
COX7C	-0.000870933	-0.00156481	-0.00209188	-0.00126269	0.00331169	-1.46597e-21
CP	0.0741036	0.126591	0.102612	0.161265	0.166808	0.0559141
CPA1	1.05343e-21	3.1773e-22	3.89273e-06	7.29644e-05	-0.000151776	-0.000102714
CPA2	1.05343e-21	3.1773e-22	1.34757e-21	4.03135e-21	0.000818832	-1.46597e-21
CPA3	0.28721	0.0193688	0.232134	0.0400511	0.13435	0.0977279
CPA4	-0.000155528	0.000596778	-0.000110989	-0.000955416	-0.000278257	-9.98263e-05
CPA6	1.05343e-21	3.1773e-22	1.34757e-21	0.000214056	-2.27911e-21	-1.46597e-21
CPB2	0.0227737	0.0188736	0.00699872	0.0172542	0.019471	-0.00376605
CPD	-0.00158354	-0.000427662	0.0101124	0.000103407	-0.00110675	0.000228997
CPE	1.05343e-21	3.1773e-22	1.34757e-21	4.03135e-21	-2.27911e-21	1.25991e-05
CPEB1	0.0030067	3.03361e-05	0.00475748	0.00266255	0.00155272	0.00275246
CPEB2	1.05343e-21	3.1773e-22	1.34757e-21	-1.62683e-05	-2.27911e-21	-1.46597e-21
CPEB4	1.05343e-21	3.1773e-22	-5.42073e-05	-4.66201e-05	-4.44094e-05	-1.46597e-21
CPLX2	1.05343e-21	3.1773e-22	1.34757e-21	3.33045e-05	-2.27911e-21	-1.46597e-21
CPM	1.05343e-21	3.1773e-22	1.34757e-21	2.69141e-06	0.000118251	0.000304192
CPN1	-6.43457e-05	-0.000337721	-0.000163226	-0.000250738	0.000130255	0.000290548
CPN2	0.00176664	0.0029228	0.00288666	0.00336699	0.000854416	0.00229723
CPNE1	0.487865	0.175351	0.199814	0.21007	0.24969	0.158571
CPNE2	0.0272048	0.0283719	0.025963	0.0290315	0.0679923	0.00492374
CPNE3	-0.0586786	-0.0641428	-0.0592103	-0.148416	-0.00546861	-0.115777
CPNE6	1.05343e-21	3.1773e-22	1.34757e-21	4.03135e-21	-2.27911e-21	0.000135279
CPNE8	1.05343e-21	-0.000902653	-0.000134028	0.00347599	0.0152548	-0.00458854
CPOX	0.0754469	0.0567052	0.0509743	0.0475519	0.0700688	0.0186554
CPPED1	-0.0187148	0.0037402	0.0640204	0.0120535	-0.0111643	0.0114771
CPQ	0.00288915	0.000850026	0.0038949	0.00436155	0.00221714	0.00314909
CPS1	0.000632828	-0.00598088	-7.51228e-05	-1.25388e-06	-7.2764e-05	-0.0100659
CPSF1	0.0253575	0.00648436	0.00782888	0.0148098	0.0088433	0.00805182
CPSF2	0.0313002	-0.000208694	0.0049939	0.0101833	0.0096492	0.00498211
CPSF3	0.00550131	-0.00458798	0.00672451	0.00455064	0.00538359	0.000211477
CPSF3L	0.000160933	-7.2193e-05	0.00121119	0.000528061	0.00043056	4.06946e-05
CPSF4	0.000507297	3.1773e-22	1.34757e-21	4.03135e-21	-2.27911e-21	-1.46597e-21
CPSF6	0.0395874	0.0349902	0.0673289	0.0716577	0.0637737	0.0243422
CPSF7	0.0265566	0.0026626	0.00227757	0.0072211	0.0224701	0.00916121
CPT1A	0.0429897	0.0424778	0.0363232	0.0781254	0.086935	0.0697597
CPT1B	1.05343e-21	3.1773e-22	1.34757e-21	4.03135e-21	-1.25708e-05	-1.46597e-21
CPT1C	1.05343e-21	3.1773e-22	-1.74124e-05	-0.000153391	-2.27911e-21	-1.46597e-21
CPT2	0.0466982	0.0113727	0.00814614	0.023785	0.0473012	0.0107419
CPVL	0.00335799	0.0015445	0.00807401	0.0108374	0.000941598	0.0108012
CPXM1	1.05343e-21	3.1773e-22	1.34757e-21	2.82018e-05	0.00056407	-1.46597e-21
CPXM2	1.05343e-21	3.1773e-22	1.34757e-21	4.03135e-21	-2.27911e-21	0.000202134
[truncated: 7,742 more rows]

## Sheet: 7c
Symbol	Track 1	Track 2	Track 3	Track 4	Track 5	Track 6
2020-03-01	0.497481	0.498716	0.504292	0.0479279	0.000571231	0.502762
2020-09-01	0.0424249	0.121363	0.0475704	0.125711	0.0833382	0.300499
2020-09-10	0.0787269	0.0189777	0.280879	0.0549843	0.00659566	0.0065871
2020-09-11	0.243677	0.201039	0.431426	0.422329	0.313437	0.616208
2020-09-15	0.00238332	0.175232	0.285048	0.135079	0.108306	0.0888622
2020-03-02	0.0555443	0.00441857	0.0184999	0.0517173	0.00413079	3.59721e-05
2020-09-02	0.343652	0.123966	0.0275718	0.170988	0.243899	0.00968045
2020-09-04	0.0681984	0.498716	0.0112916	0.00159394	0.000633481	0.0113698
2020-03-05	0.00700644	0.0389448	0.000434371	3.91251e-05	0.0131103	8.27404e-07
2020-09-05	0.000255818	0.0710894	0.00159066	0.0306342	0.0609708	0.0570224
2020-09-06	0.157394	0.225079	0.544206	0.396903	0.17758	0.46473
2020-09-07	0.168074	0.193896	0.183598	0.256599	0.307936	0.308065
2020-09-08	0.000473084	0.0297786	0.00587625	0.0285444	0.00627835	0.149601
2020-09-09	0.266165	0.0524506	0.114274	0.236615	0.292967	0.259817
A1BG	0.00407661	6.72964e-06	8.91714e-06	0.0109356	0.0519047	0.0410835
A2M	0.00895888	0.0367263	0.0051528	0.0346408	0.032268	0.00281401
A2ML1	0.401825	0.4477	0.333914	0.30794	0.367682	0.39257
A4GALT	0.497481	0.498716	0.00741095	0.500008	0.000902977	0.502762
AAAS	0.0711857	0.00798161	0.300939	0.0512692	0.0176595	0.00935824
AACS	0.0734904	0.272363	0.0491636	0.0427324	0.0256544	0.150131
AADAC	0.497481	0.498716	0.186101	0.000531904	0.00849684	6.49721e-05
AADACL2	0.497481	0.498716	0.504292	0.500008	0.0491585	0.502762
AAED1	0.497481	0.00627788	0.0344147	8.0642e-05	0.0242388	0.502762
AAGAB	0.106458	0.000547073	0.241031	0.162047	0.0432636	0.00190355
AAK1	0.114074	0.0121295	0.0184771	0.14452	0.033022	0.107812
AAMDC	0.0149702	0.498716	0.504292	0.00325503	0.000312874	0.502762
AAMP	0.497481	0.0027614	0.040787	0.000189846	0.00993719	0.10315
AAR2	0.497481	0.498716	0.0448395	0.0226881	3.24341e-05	0.502762
AARS	0.164761	0.20191	0.17282	0.111186	0.0863612	0.162212
AARS2	0.106445	0.0167544	0.000846767	0.0398412	0.052064	0.059504
AASDHPPT	0.0340495	0.00787574	0.0253056	0.0160948	0.06565	0.0127174
AASS	0.00652296	0.00893662	0.000423499	0.0215458	0.0096647	0.000639482
AATF	0.025835	0.0358294	0.0205861	0.0336335	0.0929416	0.000652671
ABAT	0.019966	0.0195328	0.0144284	0.0532673	0.0864684	0.000140535
ABCA1	0.497481	0.498716	0.504292	0.000157259	0.499899	0.502762
ABCA12	0.00282141	0.0273495	0.000271959	0.0018351	0.000181491	0.00397127
ABCA13	0.0022749	0.026744	0.0356359	0.000221057	0.018857	0.000140128
ABCA2	0.00155608	0.498716	0.504292	0.500008	0.499899	0.502762
ABCA3	0.00705124	0.00182056	0.0197982	0.00102585	0.00562101	0.0324343
ABCA4	0.0102326	0.498716	0.504292	0.500008	0.00230716	0.502762
ABCA6	0.017427	0.498716	0.504292	0.500008	0.499899	0.502762
ABCA8	0.497481	0.498716	0.0059139	1.53904e-05	7.0412e-05	0.502762
ABCB1	0.00353233	0.00217966	0.0238463	0.00378834	0.000764452	0.00143136
ABCB10	0.0189476	0.00344494	0.124486	0.067618	0.00527465	0.0121467
ABCB11	0.116547	0.00182056	0.0129943	0.0302455	2.64838e-05	0.000580065
ABCB4	0.497481	0.498716	0.504292	0.500008	3.50121e-05	0.502762
ABCB6	0.216662	0.00653854	0.235495	0.0271012	0.00508663	0.000793861
ABCB7	0.103591	6.5828e-06	0.159905	0.128621	0.141315	0.0043503
ABCB8	0.0504341	0.00620658	0.000673514	0.00118218	0.014751	0.00427787
ABCB9	0.497481	0.498716	0.504292	0.00382232	0.0137637	0.502762
ABCC1	0.136355	0.000462638	0.429015	0.122635	0.259872	0.0254099
ABCC10	0.497481	0.498716	0.504292	0.500008	0.000902977	0.502762
ABCC2	0.497481	0.498716	0.504292	0.000469883	0.00672619	0.502762
ABCC3	0.497481	0.0027614	0.0576332	0.000802157	0.00435815	0.000139238
ABCC4	0.497481	0.498716	0.00492498	0.000189846	0.499899	0.00130953
ABCC5	0.00705124	0.0077902	0.504292	0.000990205	0.000145594	0.0324343
ABCC6	0.497481	0.498716	0.504292	0.500008	0.000902977	0.502762
ABCD1	0.497481	0.0022645	0.13631	0.0122938	0.0452697	0.0324343
ABCD3	0.0813325	0.126995	0.0110996	0.0272847	0.0392015	0.0144973
ABCD4	0.497481	0.498716	0.0202108	0.000323754	0.000902977	0.502762
ABCE1	0.121752	0.000231677	0.100952	0.0778613	0.145417	0.0975928
ABCF1	0.0804676	0.134097	0.115532	0.100692	0.243134	0.056968
ABCF2	0.0513568	0.141828	0.145396	0.0771771	0.11045	0.0407333
ABCF3	0.00337901	0.0625675	0.00710171	0.0113578	0.0261591	0.00496624
ABCG2	0.497481	0.498716	0.504292	0.00540006	0.066401	0.502762
ABCG5	0.497481	0.498716	0.504292	0.00329594	0.499899	0.502762
ABCG8	0.00282141	0.498716	0.504292	0.500008	0.499899	0.502762
ABHD10	0.130498	0.154171	0.431095	0.169152	0.279621	0.129389
ABHD11	0.108938	0.123255	0.281121	0.0952906	0.204683	0.0992665
ABHD12	0.115951	0.00587412	0.0534443	0.0893897	0.0676622	0.0502331
ABHD14B	0.0207243	0.0310073	3.73929e-06	0.0489222	0.042108	0.00871264
ABHD16A	2.22684e-05	0.0211024	0.227703	0.0752157	0.000918407	0.036212
ABHD17B	0.497481	0.498716	0.504292	0.0105212	0.00358407	0.0107403
ABHD17C	0.0372477	0.0202404	0.000431617	0.0020759	0.0128063	0.00665662
ABHD3	0.017427	0.0153665	0.0448395	0.500008	0.000145594	0.00206012
ABHD4	0.00705124	0.498716	0.468216	0.00364238	0.00359399	0.00165591
ABHD5	0.0193208	0.00310382	0.504292	0.00818767	0.000902977	0.0113698
ABHD6	0.0388176	0.00217215	0.00187109	0.00564137	0.0140382	0.00378961
ABI1	5.17876e-07	0.0739964	0.0373219	0.000237554	0.0118818	0.00020448
ABI2	0.100577	0.0304766	0.0344147	0.0465039	0.499899	0.502762
ABI3	0.104979	0.182759	0.374037	0.125415	0.00373961	0.00386162
ABI3BP	0.0115373	0.293669	0.139796	0.0836259	0.0357253	0.225724
ABL1	0.497481	0.498716	0.504292	8.6675e-06	0.499899	0.0426218
ABLIM1	0.0865752	0.339698	0.106887	0.0876349	0.195221	0.186286
ABLIM2	0.0527757	0.0190123	0.00588152	0.00348082	0.00681381	0.502762
ABLIM3	0.0500455	0.0399958	0.0657071	0.0576875	0.0650605	0.108106
ABO	0.497481	0.498716	0.504292	0.00329594	0.499899	0.502762
ABR	0.0157167	0.0228325	0.0564125	0.00731515	0.161685	1.66116e-05
ABRACL	0.497481	0.498716	0.504292	0.500008	0.0574563	0.502762
ABT1	0.0337396	3.77217e-05	0.017873	0.00820774	0.00837825	0.00151972
ABTB2	0.00705124	0.498716	0.000596291	0.000802157	0.000902977	0.502762
ACAA1	0.0219092	0.0797486	0.0106303	0.0231138	0.0349276	0.00690958
ACAA2	0.207414	0.25748	0.104553	0.112717	0.206303	0.185677
ACACA	0.000517887	0.0774912	0.0338066	0.000168619	0.00497366	0.00669275
ACACB	0.497481	0.498716	0.504292	0.500008	0.499899	0.0158116
ACAD10	0.0918368	0.00924321	0.00117667	0.0191993	4.10839e-05	0.0132614
ACAD11	0.497481	0.498716	0.504292	1.31659e-05	0.499899	0.502762
ACAD8	0.00224341	0.0468872	0.100821	0.035804	0.0168461	0.0294592
ACAD9	0.0656596	0.0169721	0.108002	0.0871893	0.0939968	0.0125744
ACADL	0.0102326	0.0287035	0.06264	0.006966	0.0687821	0.0237505
ACADM	0.155654	0.158399	0.113214	0.115316	0.0604374	0.236497
ACADS	0.0498165	0.0133427	0.168906	0.0401208	0.00271971	0.0288656
ACADSB	0.034951	0.0116304	0.00332634	0.053646	0.0124684	0.0498899
ACADVL	0.0290745	0.0327577	0.00334982	0.012614	0.00232547	0.0136245
ACAP1	0.00885469	0.0111025	0.0351822	0.0408864	0.0345438	0.176667
ACAP2	0.0949379	0.0380906	0.0743263	0.068238	0.0345619	0.000736146
ACAP3	0.497481	0.498716	0.504292	0.00166192	0.499899	0.000910192
ACAT1	0.151668	0.128712	0.207398	0.137703	0.261104	0.133638
ACAT2	6.83245e-06	0.0879025	0.0218207	0.00014022	0.0255148	0.0159695
ACBD3	0.148664	0.014879	0.0423565	0.0265211	0.00799352	0.0234614
ACBD5	0.00705124	0.0027614	0.230163	0.0547093	0.0126032	0.0199356
ACBD6	0.0493495	0.00106631	0.257717	0.0602047	0.014364	0.0204562
ACCS	0.497481	0.498716	0.504292	0.500008	0.00918412	0.0563778
ACCSL	0.497481	0.498716	0.504292	0.00423888	0.499899	0.502762
ACD	0.497481	0.498716	0.504292	0.500008	0.000145594	0.502762
ACE	0.0430875	0.00014219	0.0858988	0.0288082	0.0081362	0.0412592
ACER1	0.497481	0.498716	0.0310228	0.00494243	0.00705593	0.502762
ACIN1	0.275312	0.370754	0.202151	0.269401	0.333624	0.174985
ACLY	0.000432854	0.000122073	0.0015861	0.00446554	0.025544	0.0226862
ACN9	0.497481	0.498716	0.504292	0.000138067	0.000145594	0.0116553
ACO1	0.223841	0.117611	0.226102	0.159706	0.187382	0.155233
ACO2	0.207552	0.000788239	0.0961969	0.126376	0.0616919	0.0858318
ACOT1	0.100577	0.498716	0.504292	5.85944e-07	0.499899	0.502762
ACOT11	0.0035836	0.0276297	0.00150393	0.00859735	0.0248914	0.0283431
ACOT12	0.497481	0.498716	0.504292	0.00329594	0.499899	0.502762
ACOT13	0.0132902	0.00455819	0.32759	0.0530729	0.122879	0.126798
ACOT7	0.0763708	0.257481	0.0178996	0.0851787	0.0865777	0.0802938
ACOT8	0.073757	0.00837593	0.129541	0.0561739	0.0260484	0.0002035
ACOT9	0.15952	0.262253	0.227116	0.121759	0.0936522	0.0810714
ACOX1	0.281571	0.143341	0.0674808	0.0647569	0.0608619	0.044856
ACOX2	0.0248109	0.00139291	0.322413	0.0426683	1.59723e-05	0.0537519
ACOX3	0.0458904	0.191658	0.143761	0.109381	0.129765	0.256054
ACP1	0.03358	0.0370728	0.111855	0.054807	0.0352156	0.139052
ACP2	0.0171308	0.0445244	0.27922	0.0686908	0.0225065	0.0699976
ACP5	0.162434	0.132103	0.222224	0.0995669	0.113254	0.15119
ACPL2	0.00705124	0.0176657	0.00618274	0.00135729	0.00391321	0.0113698
ACPP	0.163528	0.364079	0.129758	0.0309446	0.236381	0.233788
ACSF2	0.00418527	0.0576151	0.0401728	0.0337771	0.0315033	0.0198028
ACSF3	0.225196	0.18675	0.0579174	0.101382	0.082768	0.0527775
ACSL1	0.0158572	0.00100824	0.147837	0.0594288	0.157194	0.0232151
ACSL3	0.0280626	0.0237495	0.0060267	0.00401785	0.00943917	0.00222341
ACSL4	0.0622255	0.0615937	0.0706132	0.192642	0.113436	0.129523
ACSL5	0.497481	0.00437253	0.13631	0.0434519	0.0189413	0.15147
ACSL6	0.0375277	0.498716	0.0106385	0.00842005	0.0483507	0.0227226
ACSM3	0.00143667	0.00518628	0.0267778	9.56818e-05	0.00905372	0.00418239
ACSM5	0.497481	0.498716	0.504292	0.00197112	0.499899	0.502762
ACSS1	0.100548	0.123193	0.197812	0.207038	0.072365	0.229766
ACSS2	0.00119821	0.0379955	0.00113403	0.00651997	0.113241	0.0300202
ACSS3	0.497481	0.498716	3.32085e-06	0.0173346	0.499899	0.502762
ACTA1	0.00367841	0.15319	0.0370616	0.00159385	0.0294556	0.0360267
ACTA2	0.497481	0.498716	0.504292	0.500008	0.499899	0.502762
ACTB	0.497481	0.498716	0.504292	0.500008	0.499899	0.502762
ACTBL2	0.000730067	0.00518747	0.0230243	0.0652589	0.14311	0.139558
ACTG1	0.497481	0.498716	0.504292	0.500008	0.499899	0.502762
ACTG2	0.497481	0.498716	0.504292	0.500008	0.499899	0.502762
ACTL6A	0.14845	0.379796	0.0774671	0.152977	0.204731	0.167102
ACTL8	0.497481	0.498716	0.0059139	0.500008	0.499899	0.502762
ACTN1	0.190179	0.26177	0.302581	0.185317	0.134554	0.180337
ACTN2	0.0225009	0.000954306	0.00234468	0.000781395	0.0622779	0.004085
ACTN3	0.0468992	0.498716	0.0059139	0.500008	0.000571231	0.0158116
ACTN4	0.0319449	0.0274699	0.0221701	0.0371159	0.0135516	0.00899794
ACTR10	0.00704415	0.0159552	0.120252	0.0273109	0.00335417	0.00171875
ACTR1A	0.0394612	0.01293	0.000457114	0.0403286	0.104939	0.0241408
ACTR1B	0.0280222	0.00708966	0.0520617	0.00500247	0.0060865	0.0139955
ACTR2	0.0510821	0.158782	0.201328	0.161853	0.0307512	0.155781
ACTR3	0.158133	0.000306515	0.179235	0.0940378	0.183312	0.109396
ACTR3B	0.497481	0.0018209	0.00415092	0.0033682	3.50858e-05	0.000332059
ACTR5	7.38301e-05	0.00442833	0.0219539	0.0899215	0.00777487	0.0518749
ACTR6	0.497481	0.00742193	0.263723	2.48662e-05	0.00181805	0.502762
ACTRT3	0.497481	0.498716	0.0106385	0.500008	0.499899	0.502762
ACVR1C	0.497481	0.00182056	0.0215217	0.00540006	0.00698364	0.502762
ACY1	6.30602e-05	0.00300889	0.00256648	0.000441893	0.0955197	0.00431788
ACY3	0.497481	0.498716	0.181018	0.500008	0.499899	0.502762
ACYP1	0.136719	0.164153	0.383461	0.149663	0.214652	0.0664252
ACYP2	7.38301e-05	0.498716	0.504292	0.000234378	0.0341679	0.0396847
ADA	0.154996	0.0315453	0.115591	0.0795007	0.212279	0.363074
ADAD2	0.497481	0.498716	0.00130367	0.500008	0.00528318	0.502762
ADAM10	0.0791717	0.00948026	0.00208235	0.00612026	0.00610788	0.0918812
ADAM12	0.0131851	0.0988448	0.00648774	0.000466608	0.499899	0.502762
ADAM15	4.66902e-05	0.00420892	0.00525664	0.000241034	0.00324269	0.00914007
ADAM17	0.133228	0.0250817	0.00338881	0.02691	2.70491e-07	0.0133872
ADAM9	0.497481	0.498716	0.504292	0.00183752	0.499899	0.502762
ADAMTS1	0.497481	0.498716	0.504292	0.00329594	0.499899	0.502762
ADAMTS10	0.497481	0.498716	0.504292	0.500008	0.00705593	0.502762
ADAMTS16	0.497481	0.00814986	0.504292	0.500008	0.499899	0.502762
ADAMTS17	0.497481	0.498716	0.00485242	0.00343095	0.00230716	0.502762
ADAMTS20	0.497481	0.000117248	0.504292	0.00329594	0.499899	0.502762
ADAMTS4	0.00102264	0.498716	3.32085e-06	0.0126175	0.000549239	0.502762
ADAMTS9	0.497481	0.498716	0.504292	0.00183752	0.499899	0.502762
ADAMTSL1	0.0131851	0.498716	0.504292	0.000189846	0.499899	0.502762
ADAMTSL4	0.497481	0.498716	0.00256648	0.0386295	0.000303789	0.000910192
ADAMTSL5	0.00705124	0.498716	0.504292	0.000153275	0.499899	0.00156331
ADAR	0.45361	0.229016	0.302144	0.329177	0.172099	0.245082
ADARB1	0.497481	0.498716	0.504292	0.0173346	0.499899	0.502762
ADAT1	0.497481	0.498716	0.504292	0.500008	0.499899	0.502762
ADAT2	0.497481	0.498716	0.00256648	0.500008	0.499899	0.0184483
ADAT3	0.497481	0.498716	0.504292	0.500008	0.499899	0.00765875
ADCK1	0.497481	0.498716	0.00200075	0.500008	0.00190835	0.502762
ADCK3	0.0517847	2.27234e-05	0.21603	0.0546183	0.000256541	0.0370577
ADCK4	0.112069	0.0684494	0.134755	0.0560552	0.0495131	4.6343e-05
ADCK5	0.497481	0.498716	0.0253671	0.00213704	0.000145594	0.502762
ADCY1	0.497481	0.0130144	0.025521	0.000891649	0.00243755	0.00765875
ADCY3	0.497481	0.498716	0.504292	0.000234378	0.499899	0.0158116
ADCY4	0.000495608	0.498716	0.504292	0.500008	0.499899	0.502762
ADCY5	0.0261805	0.0028753	0.317121	0.0120278	0.0795574	0.0170683
ADCY6	0.0504341	0.498716	0.504292	0.500008	0.499899	0.502762
ADD1	0.000268357	0.0117615	0.000119951	0.000303083	0.00399093	0.047099
ADD2	1.7704e-05	0.00139091	0.292809	0.0267232	0.00112321	0.0846708
ADD3	0.0453727	0.0272257	0.154535	0.0368104	0.0047611	0.298268
ADGB	0.497481	0.498716	0.504292	0.00493029	0.499899	0.502762
ADH1B	0.0269812	0.0282024	0.0272255	0.0610317	0.0640385	0.132168
ADH1C	0.0500193	0.000670917	0.0334577	0.00231106	0.00638353	0.0121429
ADH4	3.8874e-05	0.0130144	0.504292	0.00412059	0.499899	0.0158116
ADH5	0.271998	0.119834	0.148908	0.135749	0.146064	0.0298328
ADH6	0.497481	0.498716	0.504292	0.500008	0.499899	0.0158116
ADH7	0.0194247	0.117468	0.0738885	0.02815	0.0498322	0.225296
ADI1	0.0943068	0.072551	0.0709762	0.0712999	0.0359488	0.004254
ADIPOQ	0.00653896	6.06603e-05	0.00306832	0.000962216	0.00387099	0.000122201
ADIRF	0.00153664	0.00369323	0.0234813	0.0501933	0.157117	0.0911631
ADK	0.00236858	0.0994291	0.0083869	0.00887536	0.00482178	0.0133833
ADNP	0.148523	0.000439138	0.162295	0.0808855	0.213619	0.0274106
ADNP2	0.497481	0.498716	0.504292	0.00371069	0.499899	0.00467847
ADO	0.0122493	0.191196	0.00143574	0.0297342	0.0192926	0.00754162
ADPGK	0.342615	0.050621	0.172862	0.227583	0.342736	0.236168
ADPRH	0.497481	0.498716	0.504292	0.043385	0.0034295	0.502762
ADPRHL1	0.497481	0.498716	0.504292	0.500008	3.50121e-05	0.502762
ADPRHL2	0.00609393	0.0196159	0.0123253	0.0678246	0.00422963	0.104643
ADRB1	0.497481	0.498716	0.0139695	0.0360379	0.499899	0.502762
ADRBK1	0.068601	0.090746	0.113801	0.071244	0.0126326	0.0296893
ADRM1	0.0253958	0.0409978	0.0700699	0.066501	0.00158456	0.0220429
ADSL	0.158935	0.142971	0.167695	0.132065	0.306817	0.271728
ADSS	0.0927636	0.0588186	0.222509	0.0392982	0.0360795	0.0569751
ADSSL1	0.0579146	0.00969072	0.0491331	0.00686432	0.1433	0.0146346
AEBP1	0.0673181	0.242262	0.329135	0.253781	0.162634	0.230925
AES	0.497481	0.498716	0.00388837	0.00365784	0.000947353	0.0107403
AFAP1	0.0889908	0.0190123	0.0285645	0.0160203	0.109421	0.502762
AFAP1L1	0.0375277	9.16369e-06	0.504292	0.00488389	0.000902977	0.502762
AFAP1L2	0.107071	0.0301136	8.30233e-06	0.0693714	0.000100674	0.101957
AFF1	0.497481	0.498716	0.504292	0.500008	0.499899	0.0011482
AFF2	0.0129833	0.0259052	0.00948698	1.65776e-08	0.000162817	0.166332
AFF4	0.497481	0.498716	0.111606	0.0220056	1.06788e-05	0.0186799
AFG3L2	0.00904931	3.87943e-05	0.0782876	0.0272813	0.000458858	0.00222981
AFM	0.00104387	2.6238e-09	0.0177759	0.00240539	4.83498e-06	0.000678704
AFMID	0.497481	0.498716	0.504292	0.000234378	0.000687134	0.502762
AFTPH	0.000495608	4.46097e-05	0.0054357	0.00362042	0.0189042	0.0568472
AGA	0.00384478	0.1931	0.107433	0.0919616	0.128418	0.06291
AGAP1	0.497481	0.000355841	0.504292	0.500008	0.499899	0.502762
AGAP3	0.497481	0.498716	0.00120084	3.36795e-06	0.00410917	0.0175497
AGBL2	0.0131851	0.498716	0.504292	0.500008	0.499899	0.502762
AGBL3	0.000122148	0.0027614	0.13631	0.00176384	0.499899	0.0191231
AGFG1	0.00208864	0.00361122	0.100807	0.128653	0.142958	0.0260005
AGFG2	0.0845411	0.00462849	0.0352737	0.00544711	0.00727436	0.0214842
AGK	0.000817222	0.000524854	0.0443605	0.038722	0.0115696	0.00501679
AGL	0.188688	0.0141775	0.0172966	0.0589494	0.0526952	0.00944217
AGO1	0.0770284	0.00405102	0.00370287	0.0648997	0.00175491	0.132645
AGO2	0.265231	0.000390566	0.153395	0.0255121	0.0530199	0.0562601
AGO3	0.000495608	0.0027614	0.100311	0.00766428	1.03083e-05	0.0107403
AGO4	0.497481	0.498716	0.504292	0.500008	0.000145594	0.502762
AGPAT1	0.131905	0.0289325	0.139102	0.116046	0.122468	0.171904
AGPAT2	0.497481	0.498716	0.504292	0.500008	0.0195788	0.0476658
AGPAT3	0.00413133	0.000880335	0.0657666	0.000296422	1.29038e-07	0.0177585
AGPAT5	0.0154943	0.0113507	7.43017e-11	8.94026e-05	0.0093412	0.0127086
AGPAT6	0.497481	0.498716	0.504292	0.500008	0.499899	0.502762
AGPAT9	0.497481	0.498716	0.504292	0.000118532	0.499899	0.502762
AGPS	0.065152	0.0586012	0.123956	0.016161	0.021784	0.0490207
AGR2	0.00309715	0.0864085	0.000675979	0.068548	0.159906	0.00671097
AGR3	0.497481	0.015559	0.0059139	0.00907681	0.499899	0.0324343
AGRN	0.245313	0.126876	0.237718	0.23264	0.0553787	0.144297
AGT	0.001357	2.92353e-05	0.000233319	0.000294311	0.00428523	0.00926048
AGTPBP1	0.000178574	0.0027614	0.00604981	0.000185916	0.000788669	0.00427787
AGTRAP	0.255956	0.00949012	0.0299814	0.0650196	0.0938684	0.0320694
AGXT	0.00494235	0.0130144	0.504292	0.00183752	0.499899	0.0158116
AGXT2	0.497481	0.498716	0.504292	0.500008	3.50121e-05	0.502762
AHCTF1	0.118452	0.0181902	0.0741241	0.159208	0.110539	0.0662991
AHCY	0.107041	0.0252456	0.125459	0.0396162	0.0100613	0.0553882
AHCYL1	0.00490694	0.00359766	6.2157e-08	0.00629063	0.0375338	0.0138445
AHCYL2	0.0156107	0.0560911	0.000724544	0.0013067	0.00152039	6.94958e-05
AHDC1	0.000767381	0.0127605	0.00904315	0.000895838	0.0303886	0.000304246
AHNAK	0.24283	0.301789	0.244032	0.239628	0.234397	0.497152
AHNAK2	0.0948317	0.241589	0.162032	0.196967	0.16978	0.116897
AHR	0.00684704	0.000926431	0.384933	0.0180298	0.041718	0.0408065
AHSA1	0.196473	0.485002	0.221463	0.149282	0.380446	0.0559256
AHSG	0.00012995	0.0113291	0.140944	0.102938	0.0108738	0.202556
AHSP	0.00381327	0.0275952	0.0101329	0.00806075	0.00148816	0.00187083
AIDA	0.12109	0.15943	0.31259	0.224866	0.100755	0.270483
AIF1	0.262239	0.185022	0.417419	0.235555	0.223711	0.426589
AIF1L	0.0320527	0.0388333	0.0269965	0.0470736	0.0353201	0.000341871
AIFM1	0.0783454	0.0841808	0.0913015	0.0224773	0.160326	0.0158216
AIFM2	0.497481	0.498716	0.504292	0.00774911	0.0415075	0.502762
AIM1	0.199614	0.147753	0.139789	0.188377	0.243183	0.239998
AIM1L	0.0437024	0.258046	0.137642	0.0787179	0.210859	0.142513
AIMP1	0.00690523	0.0142885	0.0718113	0.0312992	0.101765	0.000723862
AIMP2	0.00760624	0.0399501	0.111164	0.0233683	0.198353	0.00866149
AIP	0.190634	0.322002	0.0737845	0.118026	0.241508	0.106485
AJUBA	0.00021353	0.00691501	0.00764782	0.021253	0.00160939	0.00121199
AK1	0.000733998	0.00773427	0.0326321	0.00135224	0.0466261	0.0350007
AK2	0.102412	0.0376233	0.0654513	0.145317	0.27819	0.0838596
AK3	0.0514696	0.0375565	0.132969	0.0381331	0.0124386	0.00494663
AK9	0.0615375	0.498716	0.504292	0.00113933	0.059899	0.00427787
AKAP1	0.0834015	0.0067072	0.270108	0.00792833	0.000191597	0.011106
AKAP10	0.497481	0.498716	0.504292	0.00855719	0.499899	0.502762
AKAP11	0.00517252	0.00814986	0.504292	0.0292337	0.003968	0.502762
AKAP12	0.000665261	0.0792838	0.181833	0.0146112	0.0274327	0.1859
AKAP13	9.39923e-05	0.00848114	0.00693876	0.0166766	0.0123733	0.133625
AKAP17A	0.00705124	0.000717888	0.00340228	0.0354597	0.0364797	0.000163904
AKAP5	0.497481	0.498716	0.504292	0.000891221	0.00230716	0.502762
AKAP7	0.497481	0.498716	0.000596291	0.000802157	0.499899	0.502762
AKAP8	0.0206267	0.00194331	0.122562	0.0801324	0.0153194	0.104461
AKAP8L	0.0504341	0.00777477	0.138491	0.0157945	0.165319	0.0563778
AKAP9	0.0744755	6.30494e-05	0.0036915	0.0484044	0.0458868	0.000593289
AKNA	0.497481	0.498716	0.504292	0.000777916	0.499899	0.0162181
AKR1A1	0.150303	0.0803612	0.164287	0.122039	0.299374	0.124798
AKR1B1	0.202191	0.0812073	0.325832	0.278306	0.31548	0.0694899
AKR1B10	0.100879	0.0077062	0.305642	0.0552295	0.200481	0.000197029
AKR1B15	0.000310964	0.0010691	0.00823168	0.0100631	0.0288203	0.000393272
AKR1C1	0.497481	0.498716	0.504292	0.500008	0.499899	0.502762
AKR1C2	0.0979467	5.21907e-06	0.339144	0.0422108	0.374752	0.0047364
AKR1C3	0.112703	2.0886e-05	0.424062	0.0558759	0.293662	0.015137
AKR1C4	0.017427	0.498716	0.00116807	0.0106045	5.03758e-05	0.502762
AKR1D1	0.00705124	0.498716	0.504292	0.00670262	0.0477946	0.0259146
AKR1E2	0.019804	0.00336742	0.000736762	0.00714362	0.000530781	0.00782354
AKR7A2	0.127485	0.0548548	7.98684e-05	0.061926	0.216578	0.024152
AKR7A3	7.38301e-05	0.0002883	0.00119755	0.0127564	0.00230716	0.502762
AKT1	0.290607	0.0476817	0.196955	0.115265	0.131069	0.0325046
AKT1S1	0.0234261	0.000195141	0.00109685	0.0358133	0.0540461	9.90225e-06
AKT2	0.0639826	0.02876	0.0222555	0.0234116	0.0198996	0.0157112
AKT3	0.497481	0.002577	0.300842	0.0456652	0.000571231	0.0634876
AKTIP	0.00205873	5.06079e-05	0.0018515	0.00290456	0.0177965	0.0141926
ALAD	0.0104124	0.0203813	0.00379224	2.30752e-05	0.0106172	0.028731
ALB	0.000595275	0.023021	0.0703336	0.0485237	0.0209848	0.0229371
ALCAM	0.182192	0.171509	0.455578	0.0527727	0.166519	0.060733
ALDH16A1	0.281843	0.0628553	0.010845	0.225285	0.2145	0.243792
ALDH18A1	0.284098	0.0264139	0.267132	0.203222	0.121775	0.125364
ALDH1A1	0.154628	0.102328	0.303703	0.0501666	0.057378	0.0438512
ALDH1A2	0.111614	0.0381713	0.504292	5.85944e-07	0.499899	0.502762
ALDH1A3	0.104548	0.248284	0.0379725	0.174982	0.079974	0.0860885
ALDH1B1	0.0162573	0.181534	0.00763486	0.0227686	0.13085	0.00665612
ALDH1L1	0.00769207	0.00678728	0.00271756	0.00035094	0.0105457	0.000790479
ALDH1L2	0.254277	0.0778613	0.137087	0.0664054	0.0602615	0.276331
ALDH2	0.015203	0.12303	0.0107728	0.082104	0.00585884	0.0668002
ALDH3A1	0.00978605	0.135827	0.0054795	0.00533792	0.129793	0.0646923
ALDH3A2	0.00556274	0.180902	0.00301947	0.011739	0.00885775	6.46339e-05
ALDH3B1	0.01685	0.00357318	0.160389	0.000335268	0.00159903	0.00808025
ALDH4A1	0.0485959	0.0476125	0.0146978	0.0149512	0.00896586	0.0138181
ALDH5A1	0.00437522	0.00347019	0.00088306	0.000617681	0.0138511	0.0309173
ALDH6A1	0.00438338	0.0979881	0.000526734	0.0026056	0.0379914	0.036925
ALDH7A1	0.000129087	0.122544	0.0301912	0.00129176	0.114235	0.0702594
ALDH8A1	0.497481	0.498716	0.021846	0.041474	2.5582e-07	0.0107403
ALDH9A1	0.0629925	0.0601649	0.0564367	0.00559381	0.0405084	0.0598469
ALDOA	0.0160885	0.00343704	0.0361225	0.0186248	0.259393	0.000131319
ALDOB	0.0045021	0.0130144	0.504292	0.00183752	0.00230716	0.0135512
ALDOC	0.154425	0.0175141	0.00362255	0.00109489	0.151929	0.00752264
ALG1	0.110173	0.025845	0.289701	0.0766006	0.0224378	0.0914354
ALG10	0.497481	0.498716	0.504292	0.000245812	3.50121e-05	0.502762
ALG11	0.0831873	0.00738705	0.315153	0.00582617	0.000844762	0.1434
ALG12	0.0353144	0.144163	0.17125	0.127949	0.177732	0.305006
ALG13	0.497481	0.498716	0.0059139	0.00327999	0.0040485	0.502762
ALG14	0.0652445	0.498716	0.504292	0.0966845	0.0438131	0.140946
ALG2	0.114066	0.00285364	0.0221355	0.0315532	0.0640693	0.00470667
ALG3	0.156739	0.0240909	0.285633	0.118196	0.19176	0.0853174
ALG5	0.270212	0.39998	0.280641	0.212626	0.122247	0.276187
ALG6	0.0018475	0.0162854	0.022336	0.0383542	0.0620309	0.051819
ALG8	0.497481	0.498716	0.504292	0.000234378	0.499899	0.502762
ALG9	0.015473	0.0121596	0.00540176	0.00836671	0.00225029	0.0728392
ALKBH4	0.497481	0.498716	0.000596291	0.500008	0.499899	0.502762
ALKBH5	0.0744664	0.106647	0.0285535	0.0391706	0.0647274	0.049547
ALKBH6	0.497481	0.498716	0.00256648	0.500008	0.499899	0.502762
ALKBH7	0.017427	0.498716	0.504292	0.00282234	0.499899	0.502762
ALOX12	0.136478	0.0614457	0.0980491	0.109308	0.122296	0.104745
ALOX12B	0.0185498	0.0586605	0.0323918	0.00337812	0.0149677	0.000910192
ALOX15	0.0122323	0.106841	0.0917555	0.038232	0.00248682	0.0267605
ALOX15B	0.0397831	0.223134	0.165163	0.118109	0.113391	0.0529994
ALOX5	0.193919	0.150389	0.251977	0.134515	0.196383	0.246613
ALOX5AP	0.000495608	2.54522e-05	0.117622	0.00268512	0.0132048	0.000308042
ALPL	0.12885	0.00167778	0.00309959	0.0265697	0.0262159	0.00323773
ALS2CL	0.01044	0.129971	0.0555719	0.0333275	0.0534393	0.016062
ALS2CR11	0.497481	0.498716	0.504292	0.500008	0.499899	0.502762
ALX1	0.497481	0.498716	0.504292	0.500008	0.499899	0.0107403
ALX4	0.497481	0.498716	0.504292	0.0129545	0.0168092	0.502762
ALYREF	0.292142	0.111514	0.338655	0.341068	0.44478	0.116676
AMACR	0.00130671	0.00193797	0.0391674	0.0300264	0.0252712	0.00444433
AMBP	0.00133205	2.71799e-05	0.000507955	0.0088935	0.00579628	0.00552174
AMBRA1	0.497481	0.498716	0.0059139	0.000380523	0.00230716	0.502762
AMDHD2	0.147055	0.0041296	0.0300125	0.0217821	0.0554012	0.12775
AMFR	0.000254416	0.0390734	0.00351818	0.00325195	0.00523733	0.00449707
AMH	0.497481	0.0190123	0.504292	0.500008	0.499899	0.502762
AMIGO2	0.497481	0.498716	0.504292	0.500008	0.499899	0.0107403
AMOTL1	0.497481	0.498716	0.0106385	0.500008	0.0184642	0.502762
AMOTL2	0.497481	0.498716	0.504292	0.00183752	0.00595267	0.000910192
AMPD2	0.138169	0.0419007	0.29406	0.115667	0.0592738	0.205127
AMPD3	0.0124319	0.0171038	0.262591	0.0791462	0.0212588	0.233188
AMY2A	0.497481	0.498716	0.504292	0.00347406	0.499899	0.502762
AMZ1	0.497481	0.000826262	0.504292	0.00197112	0.499899	0.502762
AMZ2	0.497481	0.498716	0.504292	1.45346e-05	0.499899	0.502762
ANAPC1	0.0173222	0.00656964	0.199183	0.0144531	0.0184504	0.00419978
ANAPC13	0.017427	3.98323e-05	9.03005e-06	0.00930055	0.0752853	0.00253716
ANAPC15	0.497481	0.498716	0.504292	0.500008	0.499899	0.502762
ANAPC16	0.497481	0.498716	0.0350927	0.500008	0.00358407	0.502762
ANAPC2	0.0504341	0.498716	0.000242563	0.0179597	0.000317269	0.0562805
ANAPC4	0.0240649	0.00736512	0.00396785	0.0116929	0.00217528	0.0357179
ANAPC5	0.0393538	0.000355841	0.157723	0.0144326	0.00294557	0.00723032
ANAPC7	0.156194	5.51463e-07	0.0990901	0.0581642	0.0288379	0.0333811
ANG	0.497481	0.498716	0.504292	0.500008	0.499899	0.502762
ANGEL2	0.00471938	0.0063329	0.0204515	0.0356439	0.00697024	0.000333039
ANGPT1	0.497481	0.498716	0.504292	0.500008	0.000902977	0.502762
ANGPTL2	0.133405	0.164652	0.0843773	0.0212999	0.0738938	0.0360964
ANGPTL6	0.497481	0.498716	0.000787572	0.500008	0.00175425	6.49721e-05
ANK1	0.000527307	0.0165595	0.0963346	0.00985136	1.17549e-06	0.0328445
ANK2	0.0986555	0.0075487	0.0767987	0.0921974	0.0151282	0.0299175
ANK3	0.0231555	0.00765927	0.0322779	0.0469629	0.00265653	0.0119257
ANKAR	0.497481	0.498716	0.504292	0.00347406	0.000571231	0.502762
ANKFY1	0.0736491	0.271012	0.00121506	0.0424335	0.00880486	0.0143344
ANKH	0.497481	0.498716	0.00648774	0.0490731	0.0281458	0.502762
ANKIB1	0.497481	0.498716	0.504292	0.500008	3.50121e-05	0.502762
ANKK1	0.497481	0.498716	0.00256648	0.000891221	3.50121e-05	0.502762
ANKLE1	0.497481	0.00814986	0.504292	0.500008	0.499899	0.502762
ANKLE2	0.0125664	0.00182056	0.159903	0.0328673	0.000163533	0.0263073
ANKMY2	0.0652445	0.0988448	0.123819	0.0544023	0.499899	0.0220419
ANKRD10	0.497481	0.498716	0.504292	0.500008	0.0574563	0.502762
ANKRD13A	0.0734676	0.0136154	0.00644027	0.0554904	0.00501547	0.0770288
ANKRD13D	0.497481	0.498716	0.504292	5.85944e-07	0.499899	0.0150676
ANKRD16	0.497481	0.498716	0.504292	0.00183752	0.499899	0.502762
ANKRD17	0.0338269	0.00748754	0.168604	0.054366	0.0570344	0.00221135
ANKRD22	0.149173	0.202203	0.196604	0.0215225	0.0733439	0.14121
ANKRD24	0.0182725	0.498716	0.0106385	0.00445404	0.499899	0.502762
ANKRD27	0.497481	0.498716	0.00648774	0.000234378	0.000145594	0.0021428
ANKRD28	0.0489189	0.00344759	0.00237195	0.00646834	0.0626408	0.00299665
ANKRD29	0.497481	0.498716	0.0059139	0.000699466	0.499899	0.0659699
ANKRD30A	0.497481	0.498716	0.504292	0.500008	0.499899	0.0113698
ANKRD30B	0.000363603	0.498716	0.504292	0.000189846	0.499899	0.502762
ANKRD32	0.497481	0.498716	0.0344147	0.00329594	0.499899	0.502762
ANKRD35	0.039702	0.113502	0.0549127	0.0832108	0.0670198	0.038994
ANKRD40	0.497481	0.498716	0.504292	0.500008	3.50121e-05	0.502762
ANKRD44	0.0668993	0.00189162	0.0914684	0.114984	0.246156	0.475894
ANKRD49	0.00705124	0.498716	0.504292	0.00329594	0.499899	0.502762
ANKRD50	0.497481	0.000826262	0.504292	0.0337416	0.00327023	0.000910192
ANKRD52	0.497481	0.498716	0.504292	0.000781741	0.00358407	0.502762
ANKRD54	0.497481	0.498716	0.504292	0.500008	0.499899	0.0476658
ANKRD55	0.497481	0.498716	0.504292	0.0360379	0.499899	0.502762
ANKRD6	0.497481	0.498716	0.504292	0.500008	0.499899	0.0158116
ANKS1A	0.0507937	0.000667128	0.0611235	0.0607616	0.12879	0.046637
ANKS1B	0.497481	0.498716	0.504292	0.500008	3.50121e-05	0.502762
ANKS3	0.497481	0.498716	0.504292	0.500008	0.499899	0.502762
ANKS4B	0.497481	0.498716	0.504292	0.500008	0.499899	0.000738507
ANKS6	0.497481	0.498716	0.504292	5.85944e-07	0.499899	0.502762
ANKZF1	0.0127115	0.0153795	0.0210662	0.00596577	0.00364181	0.00748645
ANLN	0.00651089	0.0046898	0.000427807	2.48342e-07	0.000416388	0.00480393
ANO1	0.00705124	0.498716	0.504292	0.00197112	0.499899	0.502762
ANO10	0.0134866	0.0505023	0.00763489	0.0023459	0.000634142	0.000476164
ANO6	0.497481	0.00103151	0.100311	0.0481716	0.0105683	0.0871347
ANP32A	0.239452	0.230573	0.269521	0.229641	0.397737	0.370124
ANP32B	0.254358	0.268627	0.239279	0.170789	0.300486	0.164735
ANP32D	0.000991057	0.498716	0.504292	0.00179326	0.00243329	0.502762
ANP32E	0.185678	0.266964	0.189241	0.152059	0.354048	0.0649094
ANPEP	0.121983	0.161753	0.225701	0.198051	0.0313124	0.175431
ANTXR1	0.497481	0.498716	0.504292	0.0173346	0.499899	0.502762
ANXA1	0.41018	0.409563	0.278847	0.346623	0.323614	0.489248
ANXA10	0.114359	0.00936233	0.120793	0.000717771	0.0195459	0.00482102
ANXA11	0.033036	0.0140486	0.00465896	0.0170564	0.00731283	0.000113163
ANXA13	0.497481	0.498716	0.504292	0.000891221	0.00705593	0.502762
ANXA2	0.0768556	0.258021	0.0971813	0.155081	0.132663	0.204365
ANXA3	0.0016385	0.0010312	0.00543348	0.000279831	0.00470097	0.00946641
ANXA4	0.115733	0.0577395	0.0232223	0.0769072	0.0612798	0.0180934
ANXA5	0.238201	0.304226	0.364951	0.273234	0.0975048	0.379526
ANXA6	0.389121	0.621076	0.41372	0.29228	0.383996	0.557746
ANXA7	0.102067	0.070027	2.62548e-07	0.0331499	0.0424544	0.0189949
ANXA8L2	0.0445788	0.101742	0.219207	0.114154	0.143814	0.0799404
ANXA9	0.0215955	0.0436121	0.0237432	0.0270727	0.00435056	0.0437856
AOC1	0.0258718	0.498716	0.504292	0.0417714	0.499899	0.502762
AOC3	0.150467	0.0208914	0.0323323	0.0210164	0.0460062	0.0342486
AOX1	0.497481	0.0381713	0.00256648	0.00347406	0.0488407	0.0552912
AP1B1	0.000152974	0.000247165	0.000877448	0.025729	0.0158326	0.0208129
AP1G1	0.0004013	0.0545765	0.00565474	0.0122074	0.00133307	0.00280049
AP1G2	0.000918863	0.0137266	0.224427	0.0589543	0.00208474	0.00871234
AP1M1	0.14109	0.0840735	0.0719647	0.0855829	0.136765	0.0602776
AP1M2	2.04923e-05	0.0781324	0.000738501	0.0089579	0.0151477	0.0135775
AP1S1	1.34072e-08	0.0185077	0.0148973	0.00621455	0.0278101	0.00524247
AP1S2	0.167083	0.122402	0.182373	0.102508	0.179796	0.308731
AP1S3	0.00175184	0.0269719	0.0490406	6.67671e-05	0.000330682	0.00361736
AP2A1	0.140684	0.027809	0.167013	0.0829346	0.112203	0.0228824
AP2A2	0.132734	0.0034438	0.00874749	0.0716403	0.0809992	0.0137407
AP2B1	0.263957	0.265922	0.352559	0.371407	0.358873	0.165988
AP2M1	0.19205	0.00802322	0.0614274	0.110227	0.205434	0.0477817
AP2S1	0.129479	5.7773e-05	0.0228183	0.0631676	0.2255	0.00183055
AP3B1	0.126411	0.00112502	0.269443	0.098237	9.32036e-05	0.115032
AP3B2	0.497481	0.498716	0.504292	0.00316004	0.499899	0.502762
AP3D1	0.247657	0.0848302	0.0686701	0.189821	0.195413	0.114256
AP3M1	0.0740561	0.000319353	0.105509	0.013201	0.00704887	0.00387001
AP3M2	0.0937835	0.498716	0.504292	0.0360379	0.499899	0.502762
AP3S1	0.0951095	0.0036093	0.0102905	0.0312114	0.00400716	0.0245035
AP3S2	0.497481	0.0988448	0.504292	0.500008	0.499899	0.502762
AP4B1	0.497481	0.498716	0.504292	0.500008	0.000902977	1.7752e-05
AP4E1	0.00878205	0.498716	0.504292	0.0025918	0.0286556	0.502762
AP4M1	0.00705124	0.0256855	0.0265307	0.00446307	4.34657e-05	3.32432e-06
AP4S1	7.38301e-05	0.0019665	0.0114037	0.0238403	0.0258508	0.00100385
AP5B1	0.00969803	0.0176831	1.60382e-06	0.00191296	0.147597	0.00612357
AP5M1	0.0569262	3.03421e-05	6.50927e-05	0.000745394	0.00598077	0.502762
AP5S1	0.00155608	0.498716	0.504292	0.00430725	0.010158	6.35164e-05
AP5Z1	0.000495608	0.0241178	0.13631	0.0323636	0.00143705	0.0283781
APAF1	0.00163865	0.00167436	0.0484737	0.0114315	0.0113896	0.189658
APBA1	0.0106331	0.0275637	0.0115928	0.0117165	0.0120102	0.00467847
APBA3	0.497481	0.498716	0.504292	0.500008	0.0129543	0.502762
APBB1	0.497481	0.498716	0.13631	0.0652983	0.000168666	0.502762
APBB1IP	0.497481	0.00814986	0.504292	0.00147563	0.000402921	0.502762
APBB2	0.497481	0.498716	0.504292	0.500008	0.499899	0.502762
APC2	7.38301e-05	0.498716	0.00256648	2.06237e-07	0.000902977	0.502762
APCDD1	0.0131851	0.498716	0.504292	0.500008	0.499899	0.502762
APCS	0.0132723	0.0996875	9.1552e-07	0.00480266	0.00918074	0.0149893
APEH	0.0138794	0.0474921	1.28644e-05	0.000535939	0.013193	0.00123578
APEX1	0.258576	0.00571965	0.0770431	0.101167	0.320211	0.0898708
APEX2	0.000495608	0.00436107	0.00885817	0.00313422	0.000614567	0.00194497
APH1A	0.497481	0.498716	0.504292	0.000802157	0.499899	0.502762
API5	0.0848739	0.139785	0.17603	0.167168	0.0764794	0.111078
APIP	0.0914396	0.031286	0.0702224	0.0860763	0.135877	0.0900695
APLF	0.497481	0.498716	0.504292	5.85944e-07	0.499899	0.502762
APLP2	0.497481	0.498716	0.504292	0.500008	0.00358407	0.502762
APMAP	0.176399	0.0743572	0.0786014	0.099708	0.0822652	0.0992142
APOA1	0.0384476	0.150267	0.0424292	0.05912	0.0668602	0.0212213
APOA1BP	0.167408	0.444531	0.350481	0.207524	0.353471	0.0869583
APOA2	0.0168493	0.0108538	0.0300977	0.0143383	0.00397239	0.0482124
APOA4	0.0114225	0.0436609	0.000210787	0.0113807	0.00629999	0.022734
APOB	0.00421485	0.0510712	0.00660831	0.0085085	0.00109054	0.0471723
APOBEC3B	0.497481	0.498716	0.0102681	0.0479279	0.000571231	0.502762
APOBEC3C	0.0354746	0.0988448	0.0448395	0.0931172	0.0183918	0.0154748
APOBEC3F	0.0731341	0.0027614	0.00036284	0.130244	0.04337	0.0215066
APOBEC3G	0.497481	0.498716	0.504292	0.500008	0.499899	0.0476658
APOBR	0.0220254	0.0568064	0.295743	0.120594	0.0425155	0.291313
APOC1	0.00280916	0.000591579	0.0135565	0.000958635	0.0188293	4.71746e-06
APOC2	0.00943636	0.0160457	0.0341611	6.64349e-05	0.074096	0.022721
APOC3	0.0267839	0.000833587	0.0413994	0.0229793	0.0420034	0.0112083
APOC4	0.497481	0.498716	0.504292	0.00245952	0.00230716	0.000122201
APOD	0.000202038	0.0650789	0.00260991	0.000182518	0.0151814	0.00330073
APOE	0.000121868	2.11996e-07	0.0730472	0.0112999	0.00128658	0.00361115
APOF	0.0387885	0.00043017	0.000279487	0.000846069	0.0013751	0.0059897
APOH	0.0282209	0.00549809	0.00388752	0.00134294	0.00257065	0.0013486
APOL1	0.0486108	0.00174761	0.117844	2.52157e-07	0.00767745	0.0103898
APOL2	0.000394514	0.0916254	0.0078922	0.0494011	0.103271	0.124316
APOL3	0.497481	0.498716	0.504292	0.500008	0.499899	6.49721e-05
APOL4	0.497481	0.498716	0.504292	0.0360379	0.499899	0.00765875
APOM	0.0180329	0.000243377	0.00152432	0.0131261	0.0016527	0.0207298
APOO	0.0280003	0.00822185	0.256355	0.0344655	0.00283906	7.47629e-05
APOOL	0.091375	0.00910723	0.00082032	0.0912447	0.0639142	0.0509635
APP	0.261537	0.0508251	0.106263	0.0754323	0.128526	0.0095479
APPL1	0.00590811	0.00198536	0.000604615	0.00963136	0.00166781	0.024841
APPL2	0.00168186	0.0216693	0.0422187	0.0415741	0.0123474	0.0307867
APRT	0.0287228	0.0138637	4.5682e-06	0.0192939	0.0436254	0.0879345
APTX	0.00832976	0.00016204	0.0729726	0.0395909	0.0358039	0.00473196
AQP1	0.000336711	0.0609124	0.0139494	0.00765862	0.0279455	0.139146
AQP11	0.497481	0.0590408	0.504292	0.500008	0.499899	0.502762
AQR	0.196509	1.93626e-07	0.0781137	0.0098612	0.000285547	0.00549128
ARAF	0.0522259	8.30793e-06	0.121632	0.0137395	0.000593808	0.000619973
ARAP1	0.20446	0.151034	0.454088	0.189036	0.179114	0.297201
ARAP2	0.0204826	0.0027614	0.504292	0.00679337	0.00250641	0.502762
ARAP3	0.497481	0.498716	0.000596291	0.000726664	3.50121e-05	0.502762
ARC	0.497481	0.498716	0.504292	0.000189846	0.499899	0.502762
ARCN1	0.28751	0.019955	0.144755	0.0640107	0.184341	0.146877
AREL1	0.00155608	0.00814986	0.00648774	0.000594616	0.00205384	0.0158116
ARF1	0.497481	0.498716	0.504292	0.500008	0.499899	0.502762
ARF4	0.169696	0.00791809	0.134328	0.0742795	0.257581	0.24791
ARF5	0.000590587	0.00215232	0.0426103	0.0499316	0.0614183	0.0575862
ARF6	0.00820187	0.0874531	0.0168427	0.035462	0.00130876	0.0569795
ARFGAP1	0.223576	0.0765798	0.221966	0.0991407	0.0792112	0.206772
ARFGAP2	0.00245018	0.113165	0.106495	0.0598847	0.00115435	0.0149429
ARFGAP3	0.00165479	0.0863922	0.231674	0.243126	0.0978676	0.114963
ARFGEF1	0.0750164	0.040571	0.0246731	0.0591546	0.194644	0.000604915
ARFGEF2	0.000161877	0.0133228	0.000491502	0.00723874	0.00427413	0.00594277
ARFIP1	0.0594412	0.00222622	0.00878894	0.000946968	0.00012729	0.0122624
ARFIP2	0.0211271	0.0109213	0.000299095	0.00348142	3.88966e-05	0.00377132
ARFRP1	0.0175292	0.0243619	0.504292	0.500008	0.000718651	0.502762
ARG1	0.00047333	0.0472819	0.110405	0.0245883	0.0604061	0.0117086
ARG2	0.00789677	0.00549065	0.0047562	0.00230787	0.000843412	0.000113574
ARGLU1	0.497481	0.00358362	0.108192	0.00197112	0.499899	0.502762
ARHGAP1	0.0113387	0.0880396	0.153122	0.00453818	0.00823036	0.100349
ARHGAP10	0.0152085	0.0130144	0.0163968	0.00356486	0.00435815	0.0202233
ARHGAP11A	0.00282141	0.498716	0.504292	0.500008	0.499899	0.502762
ARHGAP15	0.497481	0.498716	0.504292	0.00347406	0.00358407	0.502762
ARHGAP17	0.135072	0.0617179	0.125574	0.148109	0.0756025	0.306489
ARHGAP18	0.0102326	0.498716	0.0113966	0.0180795	0.000559682	0.107657
ARHGAP21	0.497481	0.00441857	0.504292	0.0341787	0.000959291	0.502762
ARHGAP22	0.00901898	0.00816874	6.8077e-05	0.00182165	0.0011894	0.0432355
ARHGAP23	0.497481	0.498716	0.504292	0.500008	0.000902977	0.502762
ARHGAP25	0.231481	0.109693	0.122498	0.0804382	0.111432	0.254059
ARHGAP26	0.0564498	0.0420306	0.00742172	0.00641288	0.0637865	0.00135761
ARHGAP27	0.0709959	0.0442901	0.0518554	0.0468559	0.0274056	0.0427151
ARHGAP29	0.00333187	0.0335456	0.0258812	0.00467949	0.0340658	0.0168755
ARHGAP30	0.101946	0.000577842	0.0420874	0.014569	0.00793788	0.132639
ARHGAP32	0.0480144	0.0582345	0.00810901	0.0142407	0.0539757	0.0325157
ARHGAP33	0.017427	0.498716	0.000596291	0.0105212	0.499899	0.0793169
ARHGAP35	0.0237398	0.0361396	0.141132	0.0356686	0.133473	0.0199845
ARHGAP39	0.497481	0.498716	0.504292	0.500008	0.499899	0.00721123
ARHGAP4	0.251465	0.296602	0.180155	0.269139	0.268492	0.581487
ARHGAP42	0.497481	0.498716	0.504292	0.500008	0.000902977	0.0476658
ARHGAP5	0.00165875	0.00574451	0.0116998	0.00115314	0.00543476	0.00853708
ARHGAP6	0.497481	0.498716	0.504292	0.500008	0.499899	0.0150676
ARHGAP9	0.497481	0.498716	0.00152065	0.0137531	0.00361935	0.00427787
ARHGDIA	0.0713461	0.00509605	0.0532123	0.0578577	0.194575	0.0399455
ARHGDIB	0.0552883	0.013225	0.109688	0.123718	0.0265338	0.173509
ARHGEF1	0.371155	0.350619	0.155816	0.219267	0.51549	0.448101
ARHGEF10	0.497481	0.498716	0.504292	0.0360379	0.499899	0.502762
ARHGEF10L	0.12595	0.183415	0.216905	0.089438	0.151667	0.160738
ARHGEF11	0.017427	0.00643496	0.27143	8.34769e-05	0.0061681	0.000176898
ARHGEF12	0.00150631	0.0710654	0.096923	0.0443703	0.00380854	0.0170122
ARHGEF15	0.00155608	0.00112675	0.000488809	0.00679015	0.000406491	5.6198e-05
ARHGEF16	0.0226874	0.00176859	0.0440517	0.00389945	0.0159642	0.00363816
ARHGEF17	0.00282141	0.0293323	0.0367116	0.000771677	0.000164117	0.0392544
ARHGEF18	0.000879545	0.0651446	0.00201546	0.0245071	0.113699	0.00780173
ARHGEF19	0.497481	0.498716	0.504292	0.0417714	0.0574563	0.502762
ARHGEF2	0.214578	0.0294213	0.237881	0.150148	0.129889	0.159044
ARHGEF28	0.497481	0.498716	0.504292	0.00540006	0.499899	0.0113698
ARHGEF37	0.000845828	0.0257344	0.0180219	0.00608875	0.0322819	0.0307263
ARHGEF4	0.017427	0.498716	0.0175454	0.500008	0.00446781	0.0345368
ARHGEF40	0.0157014	0.0727163	0.000596291	0.0708287	0.066401	0.0090545
ARHGEF5	0.497481	0.498716	0.00256648	0.00347406	0.499899	0.502762
ARHGEF6	0.0806476	0.171889	0.153174	0.0929037	0.116473	0.366075
ARHGEF7	0.0996694	0.107117	0.198837	0.14166	0.0932389	0.298859
ARHGEF9	0.497481	0.498716	0.504292	0.00183752	0.499899	0.502762
ARID1A	0.100345	0.0644906	0.0333537	0.118351	0.0406461	0.0637568
ARID1B	0.0652445	0.000610737	0.000596291	0.0771445	0.00175525	0.059483
ARID2	0.10096	0.0038681	0.111291	0.0459454	0.0761842	0.0917596
ARID3A	0.497481	0.498716	0.018088	0.00347406	0.0502818	0.0598279
ARID4B	0.143526	0.498716	0.504292	0.0435803	0.499899	0.502762
ARIH1	0.00209984	0.0356859	0.0957919	0.0377535	0.00497249	0.00201277
ARIH2	0.000286536	0.0880983	0.00591736	0.0331945	0.0429413	0.0935391
ARL1	0.0760372	0.0732282	0.00541223	0.0235766	0.00837637	0.000118969
ARL15	0.0981185	0.0357791	0.00924799	0.00445695	0.0148166	0.00769692
ARL2	0.00198496	0.0181967	0.00239833	0.000238807	0.00466541	0.00588031
ARL2BP	0.125516	0.00982411	0.389879	0.00153523	0.00558642	0.052579
ARL3	0.192209	0.17499	0.129455	0.144034	0.0961971	0.286301
ARL4C	0.497481	0.498716	0.504292	0.500008	0.000902977	0.502762
ARL6	0.0504341	0.498716	0.13631	0.0304132	0.499899	0.502762
ARL6IP1	0.0367016	0.0767172	0.27732	0.0172083	0.00031365	0.00419075
ARL6IP4	0.00967346	0.00039258	0.0128992	0.0193358	0.0256006	0.0562966
ARL6IP5	0.00791625	0.0873175	0.308224	0.130292	0.108133	0.278825
ARL6IP6	0.0183769	0.00128361	0.0487856	0.0218185	0.00025477	0.00352174
ARL8A	0.0652445	0.0621543	0.000206398	0.0392312	0.105686	0.502762
ARL8B	0.0014537	0.085523	0.00224168	0.068258	0.0591458	0.012461
ARMC1	0.0121422	0.00928221	0.0873714	0.0441214	0.177203	0.000136769
ARMC10	0.0314433	0.0226712	0.0317775	0.0503136	1.76093e-05	0.00362503
ARMC3	0.497481	0.498716	0.504292	0.000802157	0.499899	0.502762
ARMC5	0.497481	0.498716	0.504292	0.000802157	0.499899	0.502762
ARMC6	0.0570332	0.145825	0.0927327	0.0507461	0.0291454	0.0374128
ARMC8	0.0149289	0.168687	0.129787	0.0748614	0.0305616	0.0905911
ARMC9	0.497481	0.498716	0.504292	0.000189846	0.499899	0.502762
ARMCX1	0.497481	0.00326311	0.284799	0.0466282	0.0146593	0.0159081
ARMCX2	0.000495608	0.498716	0.13631	0.00219175	0.000145594	0.001259
ARMCX3	0.00282141	0.0480394	0.504292	0.0443247	0.000145594	0.00877208
ARMCX5	0.497481	0.00182056	0.504292	0.00042308	0.000902977	0.502762
ARNT	0.497481	0.498716	0.00294904	0.500008	0.499899	0.502762
ARNT2	0.497481	0.498716	0.504292	0.000234378	0.499899	0.502762
ARPC1A	0.0413482	0.243679	0.0642082	0.0562779	0.0850503	0.153045
ARPC1B	0.0293951	0.00210059	0.119298	0.033361	0.00961455	0.18447
ARPC2	0.0132613	0.00433342	0.105361	0.00219833	0.000757842	0.0697675
ARPC3	0.0002406	0.0321824	0.0237079	0.111237	0.14629	0.0480354
ARPC4	0.0255824	0.00484817	0.0158901	0.00217168	0.0021877	0.0129176
ARPC5	0.000626228	0.0719744	0.233551	0.0307627	0.00229742	0.079846
ARPC5L	1.59149e-05	0.00202874	0.00925018	0.0118528	0.00227226	0.0683889
ARPP19	0.0580566	0.0894183	0.2041	0.0647427	0.0385373	0.11561
ARPP21	0.497481	0.498716	0.504292	0.500008	0.499899	0.502762
ARRB1	0.0245075	3.20508e-06	0.0341989	0.0200478	0.0248474	0.0355284
ARRB2	0.00855955	0.00760296	0.0712045	0.0107728	0.0401502	0.110532
ARRDC1	0.00856731	0.498716	0.0168754	0.000147692	0.00121073	0.0221562
ARSA	0.159751	0.000585674	0.191755	0.108291	0.0810693	0.0337454
ARSB	0.00494235	0.0347024	0.000528259	0.0772937	0.0415602	0.163505
ARSD	0.0194081	0.0096623	0.000152337	0.0196362	0.0108543	0.0283138
ARSF	0.0171963	0.498716	0.0167404	0.00114865	0.0112163	0.00345052
ART5	0.023426	0.0590408	0.242439	0.00798689	0.062749	0.0898732
ARVCF	0.497481	0.0027614	0.504292	7.56672e-05	0.0281458	0.502762
AS3MT	0.0684088	0.498716	0.504292	0.500008	0.499899	0.000646478
ASAH1	0.000914647	0.328254	0.0537903	0.084906	0.038222	0.0376619
ASAP1	0.497481	0.498716	0.0253671	0.00505982	0.00590822	0.00770204
ASAP2	0.00686385	0.0186146	0.171626	0.0038734	0.00358407	0.0610569
ASB15	7.38301e-05	0.0190123	0.0270072	0.00834609	0.000145594	0.0269814
ASB6	0.497481	0.498716	0.504292	0.00353808	0.0574563	0.502762
ASB7	0.497481	0.498716	0.504292	4.66045e-05	0.499899	0.502762
ASB8	0.00705124	0.498716	0.504292	0.500008	0.499899	0.502762
ASB9	0.497481	0.498716	0.504292	0.500008	0.000145594	0.000738507
ASCC1	0.00113316	0.0574021	0.00584059	0.00449828	0.0139018	1.01519e-05
ASCC2	0.0216493	0.0165328	0.1632	0.000617933	1.32436e-05	0.00599965
ASCC3	0.116665	0.0741434	0.243203	0.0869274	0.115827	0.0781486
ASF1A	0.0151826	0.0152958	0.00795889	0.0179043	0.0128847	0.00157481
ASF1B	0.497481	0.498716	0.504292	0.500008	0.0129543	0.502762
ASH1L	0.000553169	0.498716	0.504292	0.500008	0.00813981	0.502762
ASH2L	0.0853823	0.219129	0.16433	0.104809	0.167806	0.00272623
ASL	0.118465	0.0501121	0.0289384	0.00647451	9.57588e-06	0.0149791
ASMTL	0.106592	0.00273395	0.00141031	0.0120512	0.000253966	0.0562415
ASNA1	0.0256401	0.000156886	0.043491	0.051595	0.183485	0.143558
ASNS	0.0298379	0.0329076	0.177645	0.134545	0.0423831	0.0145568
ASPA	0.0226998	0.0190123	0.0206284	0.00286594	0.00175425	0.000661956
ASPDH	0.497481	0.498716	0.00157232	5.85944e-07	0.000902977	0.502762
ASPG	0.0543194	0.0939777	0.0606086	0.0564594	0.0682028	0.0709588
ASPH	0.119784	0.0762675	0.24446	0.138424	0.356281	0.0337926
ASPHD2	0.497481	0.498716	0.00750188	0.00479454	0.499899	0.502762
ASPM	0.00705124	0.498716	0.504292	0.00347406	0.499899	0.502762
ASPN	0.048298	0.00670656	0.0219533	0.0955927	0.0683479	0.0425079
ASPRV1	0.497481	0.00814986	0.504292	0.500008	0.499899	0.502762
ASPSCR1	0.058681	0.00119687	0.0916179	0.0380221	0.0561614	0.0214189
ASS1	0.200051	0.00960353	0.0410946	0.0482465	0.135207	0.00122972
ASTL	0.497481	0.00182056	0.00639029	0.00329594	0.499899	0.502762
ASTN1	0.497481	0.0590408	0.00194306	0.0305266	0.0011592	0.502762
ASTN2	0.497481	0.498716	0.504292	0.500008	0.00435815	0.502762
ASUN	0.0121965	0.0150275	0.284654	0.0425916	0.0060014	0.0176293
ASXL2	0.497481	0.000446031	0.000538403	0.0460397	2.9542e-05	0.0325989
ASXL3	0.497481	0.498716	0.504292	0.00347406	0.499899	0.502762
ATAD1	0.00686456	0.00185379	0.242198	0.108009	0.00581118	0.0391671
ATAD2	0.497481	0.498716	0.504292	5.85944e-07	0.0491585	0.502762
ATAD2B	0.00705124	0.000826262	0.504292	0.0386398	0.499899	0.502762
ATAD3A	0.117047	0.0127807	0.0487213	0.0273338	0.0728073	0.0197991
ATAD3B	0.497481	0.498716	0.504292	0.000189846	0.499899	0.502762
ATAT1	0.497481	0.498716	0.504292	0.00197112	0.499899	0.502762
ATE1	0.0103238	9.7191e-06	0.00400344	0.00765944	0.00026538	0.0575623
ATF2	0.497481	0.498716	0.504292	0.500008	0.499899	0.000910192
ATF6	0.143526	0.498716	0.504292	0.0473569	0.066401	0.502762
ATF7	0.497481	0.0027614	0.504292	0.00139826	0.499899	0.502762
ATF7IP	0.497481	1.25531e-05	0.0124522	0.0644636	0.012812	0.0383691
ATG12	0.497481	0.498716	3.32085e-06	0.500008	0.00358407	0.502762
ATG13	0.497481	0.000355841	0.0059139	0.00491793	0.0161282	0.502762
ATG16L1	0.019424	0.00201161	0.114762	6.56176e-05	0.00486579	0.00223039
ATG16L2	0.497481	0.498716	0.504292	0.00191326	0.499899	0.502762
ATG2A	0.000967967	0.0614166	0.00352835	0.0166562	2.78983e-05	0.00734483
ATG2B	4.09868e-05	0.0590408	3.53261e-05	0.000899985	9.97679e-05	0.000738507
ATG3	0.0598174	0.310565	0.160609	0.0917561	0.138582	0.124846
ATG4B	0.121311	0.0240322	0.0145603	0.116512	0.0885338	0.0145441
ATG4C	0.497481	0.498716	0.504292	0.500008	0.00175425	6.49721e-05
ATG4D	0.497481	0.498716	0.504292	0.500008	0.499899	0.0107403
ATG5	0.0363325	0.00426222	0.0534984	0.0233752	0.00208622	0.00233574
ATG7	4.63405e-05	0.0144051	0.11235	0.00693339	0.000188131	0.0206415
ATG9A	0.0420082	0.0051486	0.00932108	4.53937e-05	0.000430435	0.00211072
ATHL1	0.497481	0.498716	0.504292	0.0669857	0.0491585	0.0654312
ATIC	0.165673	0.0926569	0.19237	0.217879	0.24634	0.11458
ATL1	0.0604136	0.498716	3.14774e-05	0.000689357	0.012088	0.000122201
ATL2	0.0188352	0.00904774	0.0408167	0.00108553	0.000368391	8.21748e-07
ATL3	0.0898758	0.142571	0.0219261	0.173064	0.0439403	0.21372
ATM	0.00829238	0.00238066	0.0788805	0.183363	0.0436287	0.153047
ATMIN	0.497481	0.000355841	0.00256648	0.000802157	0.00705593	0.502762
ATN1	0.497481	0.498716	0.000596291	0.500008	0.499899	0.502762
ATOH8	0.0117448	0.498716	0.504292	0.00804394	0.000571231	0.0107403
ATOX1	0.00197729	0.00360943	0.00893263	0.000132277	0.00118445	2.00713e-05
ATP10A	0.497481	0.00814986	0.0448395	0.000479895	0.499899	0.0563778
ATP10B	0.000135273	0.498716	0.504292	0.500008	0.499899	0.502762
ATP10D	0.497481	0.498716	0.504292	0.500008	0.00239106	0.502762
ATP11A	0.0504341	0.498716	0.504292	0.500008	0.499899	0.502762
ATP11B	0.0196917	0.0066966	0.000362599	0.0169776	0.0331135	0.00323477
ATP11C	0.497481	0.498716	0.504292	0.0774484	0.499899	0.00242895
ATP12A	0.00705124	0.0590408	0.504292	0.00329594	0.499899	0.502762
ATP13A1	0.264524	0.00803434	0.103782	0.0877294	0.144223	0.24999
ATP13A2	0.497481	0.498716	0.504292	0.000189846	0.499899	0.502762
ATP13A3	0.497481	0.498716	0.504292	0.500008	0.499899	0.502762
ATP13A4	0.497481	0.498716	0.0263265	7.47299e-06	0.00435815	0.502762
ATP13A5	0.497481	0.00597387	0.127747	0.087647	0.0320874	0.0735957
ATP1A1	0.162795	0.0422258	0.00918027	0.10593	0.0436581	0.000973219
ATP1A2	0.017427	0.498716	0.0106385	0.00183752	0.499899	0.0158116
ATP1A3	0.497481	0.0190123	0.0967906	0.00171724	3.50121e-05	0.000738507
ATP1B1	0.0784461	0.169257	0.0683085	0.0923728	0.0266728	0.00349511
ATP1B3	0.145703	0.0246842	0.00362911	0.0755558	0.122936	0.00213729
ATP2A1	0.497481	0.247763	0.23371	0.0526409	1.44982e-05	0.00955203
ATP2A2	1.56772e-05	0.153808	6.37204e-05	0.0122329	0.0138598	0.033184
ATP2A3	0.252958	0.246209	0.342063	0.236004	0.285286	0.331413
ATP2B1	0.179642	0.0278083	0.0847674	0.0230685	0.0282404	0.173931
ATP2B4	0.265783	0.268298	0.0436489	0.0634809	0.013401	0.158707
ATP2C1	0.0700303	0.0226648	0.247775	0.15515	0.0687418	0.0404076
ATP2C2	0.00746959	0.498716	0.00441323	0.000234378	0.0384937	0.00242895
ATP5A1	0.171218	0.00124872	0.00184825	0.0275206	0.166418	0.0458638
ATP5B	0.127827	0.0391167	0.0226335	0.090481	0.121532	0.000429945
ATP5C1	0.0559003	0.0310902	0.00283	0.0456878	0.237293	4.631e-05
ATP5D	0.00673008	0.018605	0.000301517	0.024823	0.0636503	2.01163e-06
ATP5E	0.00635556	6.45132e-05	1.23819e-07	0.00098201	0.0218312	9.32141e-05
ATP5F1	0.0793645	0.0132301	0.0494082	0.12116	0.122861	0.0152641
ATP5H	0.0485099	0.104042	0.00816638	0.0896117	0.168712	0.0213887
ATP5I	0.000596479	0.00732497	0.00463669	0.081187	0.00339211	0.0561025
ATP5J	0.0949997	0.150539	0.0683503	0.102223	0.0624404	0.0856845
ATP5J2	0.497481	0.498716	0.504292	0.500008	0.499899	0.502762
ATP5L	0.0860794	0.0201519	0.000146891	0.0177254	0.0935457	0.00511435
ATP5O	0.0892358	0.0294794	0.00242261	0.0941909	0.0909186	0.0165095
ATP5S	0.135414	0.00189954	0.0483652	0.00462931	0.183204	0.0113522
ATP6	0.00165607	0.00398741	0.0784842	0.00838192	0.000877767	0.000307355
ATP6AP1	0.0196564	0.0217084	0.0214159	0.00557885	0.00637259	0.000109232
ATP6AP2	0.101144	0.0372409	0.0773688	0.0264466	0.0156591	0.00637943
ATP6V0A1	0.00264394	0.010424	0.027648	0.000108471	0.00329021	0.00306418
ATP6V0A2	0.00705124	0.498716	0.504292	0.500008	0.499899	0.502762
ATP6V0A4	0.497481	0.498716	0.504292	0.00329594	0.0159907	0.502762
ATP6V0C	0.497481	0.0826603	0.504292	0.121074	0.0724948	0.0452141
ATP6V0D1	0.00564159	0.0127855	0.000238618	0.00972063	0.00159127	0.00525443
ATP6V0D2	0.497481	0.498716	0.504292	0.500008	0.000571231	0.502762
ATP6V1A	0.0276838	0.00025355	0.125685	0.0904486	0.0961686	0.202967
ATP6V1B1	0.0663566	0.498716	0.504292	0.0417846	0.499899	0.0150676
ATP6V1B2	0.000299752	0.06377	0.0162228	0.0131941	0.00656764	0.00137506
ATP6V1C1	0.0286783	3.8038e-05	0.00639029	0.0178938	0.0678951	0.00968192
ATP6V1C2	0.497481	0.0590408	0.0167404	0.0139819	0.00435815	0.502762
ATP6V1D	0.0130762	0.0670456	0.0116306	0.00261373	0.0123051	0.0791234
ATP6V1E1	0.000437561	5.52487e-05	0.000398231	0.0712162	0.0668698	0.0103115
ATP6V1F	1.68115e-05	0.0626957	0.012672	0.0029982	0.00669371	0.0826263
ATP6V1G1	0.00411194	0.107829	0.145479	0.0691664	0.00883558	0.109374
ATP6V1H	0.0170162	0.0385051	0.000247317	5.74258e-07	0.00342294	3.66866e-05
ATP7A	0.00155608	0.498716	0.0254517	0.00183752	0.0491585	0.000910192
ATP8A1	0.0265253	0.0027614	0.0114037	0.000498072	0.000309989	0.502762
ATP8B1	0.0122058	0.000401577	0.0059139	0.000308401	1.22615e-05	0.502762
ATP8B4	0.497481	0.498716	0.504292	0.000234378	0.0345033	0.502762
ATP9A	0.232679	3.16646e-05	0.0710103	0.0815623	0.158878	6.22723e-06
ATP9B	0.497481	0.00461022	0.504292	0.500008	0.499899	0.0563778
ATPAF1	0.0151081	0.0644802	0.0630093	0.0220809	0.00509895	0.00402103
ATPAF2	0.206317	0.00555674	0.229216	0.0471007	0.128548	0.0176153
ATPIF1	0.00282141	0.498716	0.00294904	0.500008	0.00230716	0.502762
ATR	0.00354128	0.00182056	0.0162395	3.32828e-09	0.00499598	0.0119303
ATRIP	0.497481	0.498716	0.0596779	0.00014056	0.000902977	0.502762
ATRN	0.017427	0.498716	0.000786258	0.0356731	0.0126245	0.00687079
ATRX	0.497481	0.0988448	0.0843773	0.0410596	0.000902977	0.502762
ATXN1	0.00332812	0.498716	0.504292	0.500008	0.499899	0.502762
ATXN10	0.187457	6.22292e-05	0.120964	0.0420772	0.000149846	0.0060519
ATXN1L	0.497481	0.498716	0.504292	0.000234378	0.499899	0.502762
ATXN2	0.00151048	0.00606561	0.108528	0.0496185	0.0101414	0.0148295
ATXN2L	0.109214	3.7314e-05	0.0625244	0.139742	0.0712663	0.0312472
ATXN3	0.0376778	0.00247219	0.0678931	0.0423773	0.00743104	0.00621181
ATXN7	0.497481	0.498716	0.0059139	0.500008	0.499899	0.502762
ATXN7L1	0.0131851	0.498716	0.504292	0.500008	0.499899	0.502762
ATXN7L3	0.497481	0.498716	0.000596291	0.500008	3.50121e-05	0.000122201
ATXN7L3B	0.497481	0.498716	0.504292	0.0432287	3.50121e-05	0.502762
AUH	0.0522279	0.00182056	0.108269	0.000607755	9.45701e-06	0.0563778
AUNIP	0.497481	0.498716	0.504292	0.000234378	0.000145594	0.502762
AUP1	0.0771915	0.010824	0.0178583	0.0197177	0.0218705	0.0280579
AURKB	0.497481	0.498716	0.0448395	0.000189846	0.499899	0.502762
AUTS2	0.497481	0.498716	0.504292	0.00197112	0.499899	0.000738507
AVEN	0.00899943	0.498716	0.00471362	0.00416986	5.13365e-06	0.502762
AVL9	0.000495608	0.00582983	2.24488e-05	3.96794e-05	0.000324748	0.00895307
AXDND1	0.497481	0.498716	0.504292	0.00540006	0.499899	0.502762
AXL	0.0102326	0.498716	0.504292	0.500008	0.499899	0.502762
AZGP1	0.0121986	0.298282	0.0120124	0.0677554	0.0191775	0.108231
AZI1	0.497481	0.0027614	0.504292	0.0136832	0.499899	0.00823441
AZI2	0.0131851	0.498716	0.100311	0.500008	0.499899	0.502762
AZU1	0.124457	0.24494	0.104961	0.103589	0.0892894	0.135326
B2M	0.0257688	0.147778	0.000126208	0.0183234	0.0899808	0.0508277
B3GALT6	0.00705124	0.0027614	0.504292	0.00540006	0.499899	0.0563778
B3GALTL	0.497481	0.498716	0.504292	0.500008	0.499899	0.502762
B3GAT3	0.497481	0.498716	0.504292	0.00183752	0.010887	0.0884065
B3GNT1	0.497481	0.00814986	0.504292	0.0138263	0.00435815	0.502762
B3GNT3	0.497481	0.498716	0.0059139	0.00329594	0.499899	0.502762
B3GNT4	0.497481	0.498716	0.504292	0.500008	0.00435815	0.502762
B3GNT6	0.497481	0.498716	0.504292	0.00347406	0.499899	0.502762
B4GALNT3	0.497481	0.498716	0.504292	0.000802157	0.499899	0.502762
B4GALT1	0.000378962	0.0753343	0.108754	0.000166364	0.000682331	0.0112018
B4GALT3	7.38301e-05	0.498716	0.0059139	0.500008	0.499899	0.502762
B4GALT4	0.497481	0.498716	0.504292	0.00197112	0.499899	0.502762
B4GALT6	0.497481	0.498716	0.504292	0.500008	0.499899	0.0396847
B4GALT7	2.70956e-05	0.00410048	0.0145898	0.011263	0.00121085	0.0216038
BABAM1	0.0341843	0.0129177	0.199093	0.162492	0.20746	0.129813
BACE2	7.38301e-05	0.498716	0.504292	0.000189846	0.499899	0.0563778
BAD	0.497481	0.498716	0.00268884	0.500008	0.499899	0.502762
BAG1	0.00266479	0.00980596	0.0460537	0.01073	0.00573365	0.0033614
BAG2	0.281399	0.279179	0.153963	0.110195	0.2627	0.184118
BAG3	0.000181938	0.0998615	0.0367901	0.00100871	0.000100468	0.0328831
BAG4	0.00705124	0.498716	0.504292	0.00183752	0.499899	0.502762
BAG5	3.21409e-05	0.111696	0.262022	0.011521	0.0858821	0.0371039
BAG6	0.0193548	0.00300992	0.16444	0.0663582	0.0339064	0.0666926
BAI1	0.497481	0.498716	0.504292	0.00183752	0.499899	0.502762
BAI2	0.0265253	0.498716	0.504292	0.000802157	0.499899	0.502762
BAIAP2	0.0060324	0.241753	0.142824	0.0082391	0.0772606	0.142465
BAIAP2L1	0.0180363	0.000274938	0.0330891	0.0157853	0.000712852	0.000348696
BAIAP2L2	0.100577	0.0967393	0.112801	0.00635185	1.06712e-06	0.00596152
BAIAP3	0.497481	0.498716	0.000596291	0.500008	0.499899	0.502762
BAK1	0.00356635	0.00422016	0.0869791	0.0223781	0.00108167	0.0208402
BANF1	0.0635299	0.102538	0.11097	0.206292	0.171169	0.204339
BANK1	0.497481	0.498716	0.000596291	0.0129736	0.0517444	0.0563778
BASP1	0.169477	0.00411289	0.0649444	0.0199236	0.0122447	0.00096896
BAX	0.0796318	0.190251	0.0728991	0.174289	0.124312	0.108491
BAZ1A	0.0812289	0.0855788	0.372683	0.0193481	0.0370602	0.00174048
BAZ1B	0.0836652	0.114962	0.0388066	0.159651	0.134775	0.102825
BAZ2A	0.00378715	0.00169845	0.00227316	0.0165162	0.0047225	6.49721e-05
BBC3	0.497481	0.498716	0.504292	0.00986884	0.499899	0.502762
BBIP1	0.0102326	0.498716	0.504292	0.500008	0.499899	0.502762
BBOX1	0.0576192	0.0322176	0.0253472	0.0171025	0.0377358	0.0390118
BBS1	0.497481	0.498716	0.504292	0.500008	0.00705593	0.502762
BBS7	0.00654383	0.0415388	0.0118424	0.00309491	0.00319876	0.0203449
BBX	0.497481	0.0027614	0.0119554	0.0321485	0.499899	0.502762
BCAM	0.160525	0.0657947	0.0350449	0.187709	0.0196723	0.0616411
BCAP29	0.000495608	0.000666445	0.504292	0.000557336	0.104477	0.0081693
BCAP31	0.0308696	0.0298738	0.0996763	0.0333603	0.177969	0.193484
BCAR1	0.126731	0.00430192	0.0370506	0.0175519	0.0239351	0.0419336
BCAR3	0.497481	0.000826262	0.00256648	5.85944e-07	0.0436848	0.085456
BCAS1	0.497481	0.0027614	0.504292	0.500008	0.00351741	0.502762
BCAS2	0.148077	0.0032097	0.248901	0.0987084	0.0873198	0.0734275
BCAS3	0.00278413	0.0153665	0.0674434	0.000569709	0.000557474	0.000844831
BCAS4	0.00856925	0.498716	0.504292	0.500008	0.499899	0.502762
BCAT1	0.00877463	0.00857435	0.000463261	0.00265064	0.00427398	0.0048534
BCAT2	0.00540587	0.0142306	0.359544	0.0949844	0.147819	0.0688682
BCCIP	0.0890057	0.0336511	0.0798442	0.175244	0.11043	0.0542349
BCHE	0.017427	0.498716	0.0242544	0.0301045	0.00153498	0.115292
BCKDHA	0.0415217	0.00263075	0.0153868	0.105339	0.0324836	0.00221618
BCKDHB	0.000547599	0.00771443	0.00126858	0.0180534	0.00405155	0.000458793
BCKDK	0.00340767	0.0775937	0.0222219	0.0368925	0.029932	0.0371354
BCL10	0.0185341	0.0340444	0.0133794	0.00857573	0.000155389	0.00752474
BCL11A	0.0711414	0.498716	0.0533687	0.00381919	0.00459427	0.00195255
BCL11B	0.497481	0.498716	0.504292	0.000393389	0.00230716	0.502762
BCL2	0.0202163	0.00164556	0.117148	0.0359087	0.0595908	0.0766941
BCL2A1	0.497481	0.498716	0.504292	0.500008	0.00175425	0.502762
BCL2L1	0.0770824	0.0845857	0.0608576	0.132396	0.206241	2.1462e-06
BCL2L11	0.497481	0.498716	0.504292	0.0612301	0.499899	0.0537187
BCL2L12	0.497481	0.498716	0.504292	0.500008	0.000145594	0.502762
BCL2L13	0.158744	0.0300229	0.0947359	0.164662	0.0324963	0.0564814
BCL2L15	0.497481	0.498716	0.504292	0.500008	0.499899	0.00467847
BCL3	0.0102326	0.0206218	0.00401237	0.0339493	0.000649776	9.15078e-05
BCL7C	0.0117601	1.83394e-05	0.024535	2.45765e-07	0.000559952	0.00923379
BCL9L	0.00672162	0.000446589	0.0170318	0.011063	0.139025	0.196292
BCLAF1	0.0320837	0.0489379	0.171615	0.182543	0.255536	0.149265
BCMO1	0.497481	0.00182056	0.000596291	0.500008	0.00358407	0.502762
BCR	0.045212	0.000946428	0.00287459	0.000201541	7.98483e-05	0.000557457
BCS1L	0.0285169	0.00630504	0.0280862	0.00130934	0.00651402	0.0587648
BDH1	0.0120431	0.0268245	0.25778	0.0233547	0.115407	0.00858066
BDH2	0.0626851	0.00183295	0.00345816	0.000113502	0.0098421	0.0505332
BECN1	0.497481	0.0959651	0.00308543	0.0106416	0.000764134	0.00130669
BEND3	0.497481	0.498716	0.000282332	0.000154001	0.00230716	0.0550933
BEST3	0.497481	0.498716	0.504292	0.500008	0.00358407	0.502762
BET1	0.0629926	4.83611e-05	0.237995	0.107059	0.0518181	0.040213
BET1L	0.0398575	0.0774051	0.207243	0.0922103	0.0495892	0.0755435
BEX5	0.497481	0.498716	0.504292	0.00433464	0.00231831	0.502762
BFSP1	0.090254	0.0686857	0.073351	0.0323933	0.0472201	0.0329906
BFSP2	0.000655923	0.00015442	0.0097951	0.00328879	0.00677523	0.0135581
BGN	0.177021	0.330604	0.0189913	0.12922	0.188575	0.21724
BHLHE40	0.000495608	0.00814986	0.000345335	0.00334861	0.000145594	0.502762
BHLHE41	0.0128324	0.0711756	0.000719324	0.0474655	0.00197298	7.86335e-07
BHMT	0.497481	0.498716	0.504292	0.500008	0.00705593	0.0137661
BHMT2	0.497481	0.000355841	0.504292	0.00197112	0.499899	0.502762
BICD1	0.497481	0.498716	0.504292	0.00540006	0.499899	0.502762
BICD2	0.0392363	0.0131088	0.0736662	0.0080647	0.00336177	0.00388424
BID	0.255601	0.377694	0.268866	0.299646	0.267258	0.368834
BIN1	0.217831	0.0477643	0.0850838	0.285318	0.0593514	0.370758
BIN2	0.0271852	0.000687855	0.25778	0.110589	0.0389206	0.072427
BIN3	0.0114668	0.00864301	0.00396806	0.00531862	0.00327746	0.011745
BIRC6	0.0261015	0.000675761	0.0508568	0.0536161	0.0212426	0.00250116
BIRC7	0.497481	0.498716	0.504292	0.00183752	0.499899	0.502762
BLK	0.497481	0.498716	0.504292	0.500008	0.499899	0.0563778
BLMH	0.168168	0.0958625	0.125659	0.0806517	0.0607058	0.0387816
BLNK	0.497481	0.498716	3.32085e-06	0.500008	0.00705593	0.502762
BLOC1S1	0.0106419	0.0119097	0.270355	0.130585	0.0855556	0.165364
BLOC1S2	0.0227609	1.51673e-05	0.302783	0.0192059	0.121384	0.00267207
BLOC1S3	0.0114986	0.000254651	0.138385	0.136259	0.0377191	0.0955607
BLOC1S4	0.497481	0.498716	0.504292	0.0360379	0.499899	0.0563778
BLOC1S5	0.0112896	0.498716	0.504292	0.500008	0.0345033	0.502762
BLOC1S6	0.013228	0.0381713	0.0560853	0.0702136	0.0605714	0.134294
BLVRA	0.0738758	0.0319148	0.0212495	0.0143098	0.00732613	0.0444172
BLVRB	0.0534354	0.00380828	0.036751	0.00176444	0.0901606	0.00103389
BLZF1	0.497481	0.498716	3.33582e-05	0.00249675	0.0154763	0.0158116
BMP1	0.497481	0.498716	0.504292	0.0417714	0.499899	0.502762
BMP2K	0.00155608	0.000819838	8.51843e-07	0.000835712	0.00687884	0.0352981
BMP7	0.497481	0.498716	0.504292	0.00191103	0.499899	0.502762
BMPR2	0.0402301	0.0218348	0.000596291	0.000639382	0.00851635	0.00467847
BMS1	0.14017	0.029777	0.00659153	0.0409537	0.0530784	0.022925
BNC1	0.0270476	0.498716	0.00294904	0.0173346	0.000902977	0.502762
BNIP1	0.000410321	0.00446159	0.204587	0.00867359	0.00121581	0.0342895
BNIP2	0.017427	0.00205635	0.168366	0.0526499	0.00941404	0.0401313
BNIP3L	0.497481	0.498716	0.504292	0.0360379	0.499899	0.502762
BNIPL	0.216644	0.293479	0.166045	0.229312	0.177118	0.275097
BOD1	0.0652445	0.0381713	0.504292	0.0104537	0.499899	0.502762
BOD1L1	0.0504341	0.000438705	0.0368021	0.0105536	0.000790964	0.000108361
BOK	0.497481	0.498716	0.504292	0.00329594	0.499899	0.502762
BOLA1	0.0467614	0.226702	0.0121453	0.00641478	0.0451225	0.00197096
BOLL	0.497481	0.498716	0.504292	0.500008	0.499899	0.502762
BOP1	0.149409	0.0678296	0.0252905	0.0425113	0.139369	0.0733842
BPGM	0.145261	0.0789022	0.0292325	0.0377788	0.0900927	0.0672255
BPHL	0.044132	0.028014	0.073203	0.0284465	0.269902	0.0217651
BPI	0.157611	0.0774683	0.0452439	0.0238682	0.100698	0.016725
BPIFA1	0.0379673	0.498716	0.00914271	0.00986213	0.0250958	0.000404491
BPIFA2	0.00282141	0.0191976	0.0259845	0.000990951	0.0155759	0.00409632
BPIFB1	0.00548252	0.0267473	0.00693857	0.000325974	0.00278227	0.0143604
BPIFB2	0.0382588	0.0479777	0.044764	0.0215679	0.0143152	0.0101529
BPNT1	0.00503235	0.0437447	0.0188486	0.125723	0.077895	0.0241604
BPTF	0.01941	0.00225732	0.00199694	0.0648187	0.00294874	0.0526986
BRAF	0.497481	0.0130144	0.504292	0.00407039	0.00569381	0.0034016
BRAP	0.000149464	0.00146247	0.0156405	0.0399791	0.00482899	0.000537377
BRAT1	0.100508	0.101903	0.179449	0.0481571	0.134993	0.031233
BRCA2	0.00458908	0.00814986	0.00108154	0.00990913	0.00705593	0.502762
BRCC3	0.000144389	9.22839e-05	0.000118111	0.0141637	0.0285316	0.00271476
BRD1	0.017427	1.20542e-05	0.504292	0.0276234	0.0249269	0.00110272
BRD2	0.0769101	0.000235052	0.00867246	0.0235844	0.00373078	0.00779693
BRD3	0.0318742	0.00952157	0.0282396	0.0137502	0.0029691	0.0151754
BRD4	0.209386	0.025856	0.0191183	0.113897	0.0776178	0.0273404
BRD7	0.00665278	0.0027614	0.504292	0.500008	0.499899	0.502762
BRD8	0.0191163	0.0381713	0.000115567	0.0158363	0.0742786	0.0702244
BRD9	0.497481	0.498716	0.504292	0.500008	0.000145594	0.00242895
BRE	0.0200811	0.0665614	0.0452916	0.0985383	0.0465025	0.0244541
BRF1	0.0504341	0.498716	0.504292	0.500008	0.499899	0.502762
BRI3BP	0.0651216	0.000134007	0.0597267	0.0911759	0.1337	0.065997
BRIX1	0.0477124	0.00373589	0.017738	0.0363864	0.0907227	0.0145888
BRK1	0.00519743	0.0154862	0.0389951	0.00554018	0.0399529	0.0207408
BRMS1	0.497481	0.0027614	0.13631	0.000234378	0.499899	0.0107403
BRMS1L	0.497481	0.498716	0.504292	0.500008	0.000902977	0.000910192
BROX	0.00865149	0.000178141	0.231291	0.0350203	0.0148726	0.0499383
BRPF1	0.497481	0.0027614	0.000571559	0.00653697	0.00130444	0.0136619
BRPF3	0.00155608	0.00814986	0.504292	0.00940584	0.0103858	0.0137074
BSCL2	0.000604477	0.0130144	0.00401018	0.00958931	0.0331588	0.0113698
BSDC1	0.00215259	0.00207751	0.00996988	0.0036672	0.0098944	0.0247876
BSG	0.0530003	0.0830775	0.0323689	0.0335954	0.0828587	0.0030991
BSN	0.497481	0.498716	0.504292	0.00329594	0.499899	0.502762
BSPRY	0.0158	0.0321384	0.0637413	0.00334463	0.00449354	0.00765875
BST1	0.0965235	0.262375	0.299039	0.120136	0.0869656	0.0511085
BST2	0.00676779	0.00287625	0.00124912	0.0134898	0.0156004	0.044701
BTAF1	0.119986	0.0115182	0.131261	0.0956006	0.00966313	0.00220632
BTBD1	0.497481	0.0027614	0.504292	5.85944e-07	0.499899	0.502762
BTBD11	0.012434	0.0720368	0.0351432	0.0224348	0.13486	0.118319
BTBD18	0.00839601	0.0343114	0.0363465	0.0011985	0.00474328	0.0385535
BTBD3	0.000495608	0.498716	0.504292	0.500008	0.499899	0.502762
BTBD7	0.497481	0.498716	0.323843	0.0220156	0.499899	0.0150676
BTD	0.00073322	0.0809441	0.0375857	0.0582497	0.0528098	0.105184
BTF3	0.000191305	0.0300247	0.000665764	0.0135649	0.0374309	0.00903867
BTF3L4	0.0577572	0.00262701	0.0861218	0.120582	0.205107	0.0317876
BTG1	0.497481	0.498716	0.504292	0.500008	0.00705593	0.502762
BTK	0.497481	0.498716	0.504292	0.028357	0.499899	0.0396847
BTN2A1	0.00223996	0.0209923	0.00304036	0.0112582	0.00719754	0.0509061
BTN2A2	0.497481	0.498716	0.504292	0.500008	0.499899	0.0107403
BTN3A1	0.497481	0.498716	0.00256648	0.500008	0.499899	0.0476658
BTN3A3	0.497481	0.498716	0.0626051	0.0888428	0.00138948	0.109768
BTNL8	0.497481	0.498716	0.504292	0.00410667	0.499899	0.502762
BUB1	0.0378794	0.498716	0.00811761	9.38879e-07	0.499899	0.502762
BUB1B	0.497481	0.498716	0.0106385	0.500008	0.499899	0.502762
BUB3	0.10477	0.0216185	0.20789	0.077158	0.134439	0.00942222
BUD13	0.497481	0.0027614	0.504292	0.0104152	0.499899	0.502762
BUD31	0.168015	0.0410168	0.170535	0.147296	0.347345	0.0772353
BYSL	0.0593705	0.00030891	0.121308	0.0435312	0.120019	0.0242229
BZRAP1	0.00972634	0.498716	0.00836555	8.96911e-05	0.00549679	0.0274624
BZW1	0.0113642	0.0551217	0.00576176	0.00298648	0.0223502	0.0240013
BZW2	0.0884418	9.31153e-05	0.00744652	0.00327684	0.0592953	0.00705919
C10orf118	0.0302526	0.0346549	0.0138862	0.00367559	0.000759172	0.0411554
C10orf131	0.497481	0.498716	0.504292	0.00347406	0.499899	0.502762
C10orf2	0.00705124	0.498716	0.504292	0.00540006	0.499899	0.502762
C10orf32	0.000447086	0.00296891	0.338806	0.0148262	0.00315645	0.0021428
C10orf35	0.497481	0.00441857	0.000596291	0.0394741	0.00418693	0.502762
C10orf54	0.497481	0.00125891	0.287244	0.106169	0.0223039	0.0182184
C10orf68	0.497481	0.0027614	0.504292	0.500008	0.499899	0.502762
C10orf71	0.497481	0.498716	0.504292	0.00347406	3.50121e-05	0.502762
C10orf76	0.00887678	0.0592871	0.0167298	0.00529687	0.00237816	0.00836998
C10orf90	0.497481	0.498716	0.504292	0.500008	3.50121e-05	0.502762
C10orf99	0.497481	0.0190123	0.504292	0.000119156	0.00565736	0.0128139
C11orf21	0.00282141	0.498716	0.504292	0.000189846	0.499899	0.502762
C11orf30	0.497481	0.498716	0.504292	0.00540006	0.499899	0.502762
C11orf31	0.179701	0.121265	0.162973	0.20361	0.284043	0.158685
C11orf40	0.497481	0.498716	0.504292	0.0479279	0.499899	0.502762
C11orf54	0.0303855	0.0230892	1.38282e-05	0.00480921	0.0144966	0.0484856
C11orf58	0.124536	0.0829354	0.259928	0.160676	0.0962012	0.276238
C11orf68	0.233284	0.00576971	0.10739	0.07565	0.0927751	0.065257
C11orf73	0.000746219	0.0312092	0.00760945	0.00269388	0.00125845	0.00419481
C11orf83	0.093672	0.000877389	0.000803704	0.0299129	0.0119229	0.0167277
C11orf84	7.38301e-05	0.0027614	0.0517426	0.0117223	0.00604137	0.00934054
C11orf96	0.497481	0.498716	0.504292	0.500008	0.499899	0.502762
C12orf10	0.00216986	0.0368439	0.210349	0.0166163	0.000131134	0.0802413
C12orf23	0.0953471	0.0417656	0.315677	0.132924	0.0443463	0.171132
C12orf28	0.00705124	0.498716	0.504292	0.000802157	0.499899	0.00311198
C12orf29	0.497481	0.00814986	0.504292	0.00353015	0.00918412	0.0158116
C12orf43	0.497481	0.000750204	0.117578	0.0127504	0.0665023	0.00548087
C12orf44	0.00219276	0.0142502	0.00150438	0.00028893	0.064408	0.000136066
C12orf45	0.497481	0.498716	0.504292	0.00774911	0.499899	0.502762
C12orf5	0.152068	0.0378867	0.068605	0.0219922	0.0255792	0.0402388
C12orf57	0.00307706	0.0776255	0.478241	0.153192	0.0315327	0.122154
C12orf75	0.0178326	0.000355841	0.100503	0.00555441	0.000902977	0.00147954
C14orf1	0.0508333	0.0205118	0.00372756	0.00514704	0.00226584	0.502762
C14orf105	0.497481	0.498716	0.504292	4.94636e-05	0.0889563	0.502762
C14orf119	0.0504341	0.498716	0.00954597	0.00355862	0.000145594	0.502762
C14orf142	0.00621783	0.0080284	0.00502969	0.010427	0.00172561	0.107053
C14orf159	0.12629	0.0667893	0.0582908	0.0613028	0.0621422	0.147514
C14orf166	0.0532156	0.104984	0.0767795	0.0494368	0.0471885	0.0180158
C14orf169	0.0145104	0.00557148	0.0021992	0.00734983	0.0172197	0.0227263
C14orf182	0.497481	0.0844436	0.504292	0.500008	0.499899	0.502762
C14orf2	0.497481	0.498716	0.504292	0.010435	0.0345033	0.502762
C14orf80	0.497481	0.498716	0.504292	0.500008	0.499899	0.0107403
C15orf39	0.497481	0.498716	0.504292	0.500008	0.499899	0.021738
C15orf40	0.017427	0.167992	0.000617176	0.0241878	3.50121e-05	0.502762
C15orf48	0.0520026	0.0138453	0.0328984	0.00287403	0.002823	0.00522765
C15orf52	0.497481	0.021346	0.00516302	0.0257367	0.0020224	0.00455823
C16orf13	0.0390378	0.0236219	0.00413952	0.0271971	0.0983146	0.0624208
C16orf54	0.497481	0.498716	0.504292	0.0147111	3.8797e-06	0.055177
C16orf55	0.497481	0.498716	0.504292	0.500008	0.000902977	0.502762
C16orf58	0.0251297	0.498716	0.504292	0.500008	0.499899	0.502762
C16orf59	0.497481	0.498716	0.504292	0.500008	0.499899	0.0021428
C16orf62	0.00685648	0.00273728	0.217858	0.00238297	0.126065	0.0185833
C16orf70	0.00705124	0.498716	0.504292	0.00197112	0.499899	0.502762
C16orf78	0.0131851	0.498716	0.504292	0.000802157	0.499899	0.502762
C16orf80	0.0729583	0.0398295	0.0440076	0.0567947	0.0388299	0.106176
C16orf87	0.497481	0.498716	0.504292	0.00558035	0.499899	0.0259146
C16orf89	0.497481	0.498716	0.504292	0.00540006	0.499899	0.502762
C17orf104	0.0131851	0.498716	0.504292	0.00540006	0.499899	0.502762
C17orf49	0.111925	0.29279	0.0512775	0.217909	0.217351	0.179041
C17orf58	0.143526	0.498716	0.504292	0.500008	0.499899	0.502762
C17orf59	0.0267826	0.032454	0.0248841	0.00351946	0.000219794	0.0648926
C17orf62	0.0493058	0.0251248	0.330774	0.00204534	0.00174709	0.00526519
C17orf75	0.0475813	0.00110125	3.19714e-05	0.0159751	0.00543472	0.0299914
C17orf77	0.497481	0.0381713	0.504292	0.001175	0.0222524	0.502762
C17orf80	0.497481	0.498716	0.504292	0.500008	0.00358407	0.502762
C17orf85	0.017427	0.00140092	0.444507	0.0614356	8.79571e-05	0.159622
C17orf96	0.00155608	0.0190123	0.504292	0.00228056	0.00435815	6.49721e-05
C18orf25	0.0766449	0.000567785	0.00768273	0.000112059	0.00202158	0.00750947
C18orf8	0.089524	0.055463	0.073839	0.0431607	0.00754874	0.000874522
C19orf10	0.0689339	0.150037	0.0828882	0.158028	0.0414266	0.214289
C19orf12	0.0551658	0.00541781	0.0157029	0.0170507	0.0134102	0.0262105
C19orf25	0.00249125	0.0550829	0.252043	0.0990893	0.0697297	0.038448
C19orf33	0.497481	0.498716	0.504292	0.500008	0.499899	0.502762
C19orf35	0.497481	0.498716	0.13631	0.0522323	0.0219498	0.0551458
C19orf38	0.497481	0.498716	0.504292	0.00347406	0.499899	0.502762
C19orf43	0.0981967	0.0027614	0.000184683	0.0013737	0.0190866	0.000122201
C19orf47	7.38301e-05	0.498716	0.504292	0.00434167	0.00918412	0.502762
C19orf52	0.0652445	0.498716	0.504292	0.0224916	0.00670089	0.502762
C19orf54	0.497481	0.498716	0.246589	0.00457894	0.0021025	0.131111
C19orf59	0.497481	0.0153665	0.101897	0.055384	0.080735	0.0274962
C19orf66	0.048491	0.074496	0.0732177	0.0114885	0.0217655	0.024772
C19orf68	0.0131851	0.498716	3.32085e-06	0.00445842	0.00705593	0.0107403
C19orf70	0.0331172	0.0523605	0.127854	0.121373	0.127753	0.0878458
C1GALT1	0.497481	0.498716	0.504292	0.00183752	0.0281458	0.502762
C1orf106	0.497481	2.44086e-05	0.00294904	8.04646e-05	0.00230716	0.00328376
C1orf109	0.497481	0.498716	0.504292	0.500008	0.00358407	0.502762
C1orf116	0.164674	0.241937	0.110591	0.145432	0.167974	0.0950592
C1orf122	0.00412465	0.0019649	0.000404045	0.000138225	0.00016139	0.00112415
C1orf123	0.0123876	0.134123	0.0129807	0.0271127	0.0107167	0.000876761
C1orf127	0.497481	0.498716	0.504292	0.00197112	0.499899	0.502762
C1orf141	0.497481	0.498716	0.504292	0.500008	0.499899	0.0021428
C1orf168	0.497481	0.498716	0.504292	5.85944e-07	0.499899	0.502762
C1orf172	0.017427	0.498716	0.00294904	0.000234378	0.0184545	0.000910192
C1orf174	0.497481	0.498716	0.504292	0.500008	0.499899	0.000910192
C1orf177	0.497481	0.0190123	0.504292	0.00314828	0.0104123	0.502762
C1orf185	0.497481	0.000826262	0.504292	0.500008	0.000974398	0.502762
C1orf195	0.497481	0.498716	0.504292	0.500008	0.00606069	0.502762
C1orf198	0.000288102	0.00215127	0.0344147	0.0015495	0.000734272	0.000910192
C1orf21	0.497481	0.498716	0.504292	0.00774911	0.499899	0.502762
C1orf226	0.497481	0.498716	0.504292	0.000282465	0.499899	0.502762
C1orf27	0.0202422	0.029752	0.0217152	0.00585699	0.000101367	0.00246103
C1orf35	0.0950819	0.00476064	0.226322	0.0800752	0.13485	0.0132137
C1orf50	0.497481	0.498716	0.504292	0.000189846	0.0374658	0.0107403
C1orf52	0.497481	0.498716	0.504292	0.000189846	0.499899	0.502762
C1orf65	0.497481	0.498716	0.504292	0.00347406	0.499899	0.502762
C1orf68	0.497481	0.498716	0.504292	0.000189846	0.499899	0.502762
C1orf85	0.000704978	0.0988448	0.00142592	0.102777	1.60627e-06	0.00432443
C1orf95	0.0853883	0.0190123	0.0255577	0.0522267	0.0874578	0.0640986
C1QA	0.497481	0.0313183	0.00249664	7.14499e-06	0.00364755	0.0532083
C1QB	0.000325643	0.0583783	0.0120848	0.0545109	0.00694759	0.228829
C1QBP	0.171438	1.26907e-06	0.116909	0.0696096	0.452598	0.00937379
C1QC	0.000271302	0.00133261	0.012137	0.00575021	0.0540461	0.059558
C1QTNF5	0.497481	0.498716	0.504292	5.85944e-07	0.499899	0.502762
C1QTNF7	0.00705124	0.498716	0.504292	0.500008	0.499899	0.502762
C1QTNF9	0.497481	0.498716	0.00648774	0.500008	0.499899	0.502762
C1R	0.0512017	0.0494218	0.00108329	0.00658461	0.00816051	0.000738512
C1RL	0.497481	3.54864e-05	0.504292	0.0133606	0.0353776	0.502762
C1S	0.0943998	0.0424186	0.204909	0.0728936	0.0156787	0.190423
C2	0.00347388	0.0303008	0.0448489	0.0772587	0.0430653	0.0967075
C20orf24	0.497481	0.498716	0.012324	0.500008	0.499899	0.502762
C20orf26	0.0357468	0.024128	0.0410027	0.0111286	0.00968691	0.00999158
C20orf27	0.0652445	0.136986	0.504292	0.0396737	0.0184864	0.0129232
C20orf85	0.497481	0.498716	0.504292	0.00329594	0.499899	0.502762
C21orf33	0.0190067	0.0388352	0.00164756	0.0152338	0.145079	0.00907084
C21orf59	7.38301e-05	6.31244e-06	0.000440367	0.00605513	0.00129717	0.00467847
C2CD2	0.497481	0.498716	0.0167404	0.500008	0.066401	1.07961e-05
C2CD5	0.00327129	0.00550423	0.0131296	0.0227602	0.00404652	0.0364672
C2orf16	0.0449454	0.0027614	0.00425656	0.0526512	0.000162446	0.0119998
C2orf27B	0.0131851	0.498716	0.504292	0.500008	0.499899	0.502762
C2orf43	0.0592625	0.000414272	0.176221	0.0541504	0.00189186	0.0305871
C2orf47	0.0647438	0.00840479	0.277491	0.0505494	0.00351374	9.86719e-06
C2orf49	0.0131851	0.0027614	0.13631	0.00644328	0.00358407	0.502762
C2orf54	0.273876	0.493947	0.282951	0.307264	0.293485	0.342845
C2orf69	0.0988463	0.0218348	0.222517	0.0103836	0.00952596	0.0152694
C2orf71	0.00561333	0.498716	0.504292	6.50186e-05	0.499899	0.502762
C2orf76	0.000583375	0.498716	0.0891128	0.0180545	0.00417001	0.0065265
C2orf82	0.497481	0.498716	0.504292	0.500008	0.00417259	0.0384109
C3	0.0236973	0.00121734	0.0118728	0.00785853	0.0434164	0.00539415
C3orf17	0.497481	0.000826262	0.0448395	0.500008	0.00230716	0.502762
C3orf20	0.000495608	0.498716	0.504292	0.500008	0.499899	0.502762
C3orf37	0.0786328	0.0263916	0.171767	0.123981	0.0851418	0.0239573
C3orf55	0.497481	0.498716	0.504292	0.00183752	0.499899	0.502762
C3orf58	0.0291124	0.0844436	0.00019351	0.00576546	0.000369131	0.00467847
C4A	3.59986e-05	0.10931	0.00389128	0.047535	0.0368403	0.0406353
C4BPA	0.00908661	0.0249977	0.0111908	0.000433745	0.0240307	0.0125112
C4orf21	0.497481	0.498716	0.504292	0.000234378	0.499899	0.502762
C4orf27	0.0082255	0.0818291	0.0106172	0.00511622	0.0557851	0.0287409
C4orf29	0.497481	0.498716	0.000596291	0.500008	0.499899	0.502762
C4orf3	0.0266222	6.58353e-05	3.32085e-06	0.0511126	0.00358407	0.0107403
C4orf32	0.0504341	0.498716	0.504292	0.500008	0.499899	0.502762
C4orf33	0.497481	0.0130144	0.00835573	0.00220241	0.00551922	0.000555884
C5	0.0109074	0.0141223	0.0140302	0.0292381	0.00586479	0.00566243
C5AR1	0.228375	0.0563234	0.0403163	0.0834202	0.00975556	0.0882679
C5orf20	0.000495608	0.498716	3.32085e-06	0.500008	0.499899	0.502762
C5orf22	0.497481	0.498716	0.504292	0.000234378	0.499899	0.502762
C5orf24	0.497481	0.498716	0.504292	0.500008	0.0345033	0.502762
C5orf38	0.497481	0.498716	0.504292	0.500008	0.499899	0.0113698
C5orf50	0.497481	0.498716	0.504292	0.000391085	0.000145594	0.502762
C5orf51	0.0103003	0.0319596	0.00196601	0.0125295	0.000423387	0.0192349
C6	0.0778375	0.270101	0.111169	0.0415966	0.0376094	0.0442145
C6orf120	0.497481	0.498716	0.504292	2.84555e-05	3.50121e-05	0.502762
C6orf132	0.071364	0.294196	0.133252	0.00417474	0.190625	0.0975407
C6orf136	0.497481	0.00182056	0.504292	0.000234378	0.499899	0.502762
C6orf15	0.497481	0.498716	0.504292	0.0360379	0.499899	0.502762
C6orf163	0.0588499	0.00281145	0.00147801	0.0495593	0.019855	0.0276165
C6orf170	0.0204823	0.498716	0.504292	0.500008	0.499899	0.502762
C6orf183	0.497481	0.498716	0.504292	0.000802157	0.499899	0.502762
C6orf203	0.0443635	0.00275644	0.000241629	0.0170472	0.102032	0.0144031
C6orf211	0.293487	0.0672123	0.299593	0.204631	0.1328	0.0597269
C6orf223	0.012341	0.0591717	0.210443	0.0825248	0.0981773	0.179627
C6orf47	0.0145817	0.0210963	0.00584867	0.00374897	0.00323476	0.0126054
C6orf57	0.497481	0.0480394	3.32085e-06	0.000234378	0.499899	0.502762
C6orf70	0.0265804	0.0216722	0.00331082	0.0332319	0.0473156	0.000184286
C7	0.00625731	0.00234005	0.0434982	0.0663042	0.00395377	0.0401526
C7orf25	0.497481	0.498716	0.504292	0.00183752	0.499899	0.00765875
C7orf26	0.0587516	0.010382	0.000808053	0.013051	0.00703234	0.0117165
C7orf50	0.0511707	0.0359256	0.236292	0.0629186	0.0431354	0.0452946
C7orf55	0.497481	0.498716	0.504292	0.500008	0.499899	0.0563778
C7orf63	0.497481	0.498716	0.504292	0.500008	0.499899	0.0158116
C8A	0.0422998	0.0356879	0.162182	0.0504965	0.0185477	0.15475
C8B	0.053822	0.0892612	0.0419962	0.0608021	0.0199656	0.0609601
C8G	0.181652	0.00954129	0.000127743	0.0274035	0.0249563	0.001402
C8orf33	0.497481	0.498716	0.13631	0.500008	0.499899	0.502762
C8orf76	0.497481	0.498716	0.504292	1.09825e-06	0.499899	0.00427787
C8orf82	0.0221361	0.00337769	5.57672e-05	0.0280421	0.0770815	0.0514195
C9	0.0866611	0.164263	0.0614762	0.0388333	0.158571	0.0463756
C9orf114	7.38301e-05	0.00824393	7.01697e-06	0.0013259	0.000833614	0.000185237
C9orf142	0.141901	0.0732318	0.111177	0.0971154	0.0948903	0.189114
C9orf16	0.0131851	0.498716	0.504292	0.500008	0.499899	0.502762
C9orf169	0.00359414	0.0904116	0.0296269	0.0174401	0.0114446	0.502762
C9orf24	0.497481	0.498716	0.504292	0.500008	0.000145594	0.502762
C9orf40	0.0120414	0.498716	0.504292	0.0652777	0.0591276	0.502762
C9orf41	0.00705124	0.0130144	0.148029	0.000562327	0.00746816	0.00393769
C9orf50	0.497481	0.498716	0.504292	0.00347406	0.499899	0.502762
C9orf57	0.497481	0.498716	0.0059139	0.0271268	0.00289381	0.502762
C9orf64	0.256056	0.0431466	0.213942	0.129895	0.0316384	0.086736
C9orf78	0.0254612	0.00920728	0.011042	0.00242949	0.0353261	0.0465254
C9orf84	0.497481	0.498716	0.504292	0.00109828	0.000145594	0.502762
C9orf89	0.017427	0.007445	0.504292	0.0132823	0.000189084	0.0221079
CA1	0.0656981	0.0160432	0.0167553	0.021171	0.0187731	0.000963709
CA12	0.0147012	0.0104651	1.15269e-06	0.00550979	0.0472199	0.0834804
CA13	0.497481	0.0249801	0.0167404	0.00718468	0.499899	0.0113698
CA2	0.0436409	0.0662213	0.0126691	0.000405513	0.0322444	7.96483e-05
CA3	0.017427	0.498716	0.00294904	0.000826095	0.00230716	0.00547648
CA4	0.497481	0.498716	0.504292	0.00183752	0.499899	0.502762
CA5B	7.38301e-05	0.498716	0.504292	0.500008	0.499899	0.502762
CA6	0.497481	0.498716	0.504292	0.500008	0.000902977	0.502762
CA8	0.017427	0.498716	0.504292	0.500008	0.499899	0.502762
CA9	0.497481	0.498716	0.504292	0.00395563	0.499899	0.502762
CAAP1	8.89038e-05	0.00814986	0.0167404	0.000725678	0.0114061	0.00127614
CAB39	0.0254068	0.00166506	0.19112	0.0206431	0.049781	0.190088
CAB39L	0.00040141	0.0354843	0.00842139	0.0136787	0.0102432	0.01328
CABLES2	0.497481	0.498716	0.504292	0.500008	0.499899	0.502762
CABP1	0.497481	0.498716	0.504292	0.0465744	0.499899	0.502762
CABP4	0.497481	0.498716	0.504292	0.000189846	0.499899	0.502762
CACHD1	0.0131851	0.498716	0.504292	0.500008	0.499899	0.502762
CACNA1E	0.497481	0.00361066	0.22244	0.00829816	0.0692507	0.0107133
CACNA1H	0.0171961	0.498716	0.504292	0.0108734	0.00259689	0.502762
CACNA1S	0.497481	0.498716	0.504292	5.85944e-07	0.499899	0.00233727
CACNA2D1	0.069271	0.0696159	0.124779	0.0557019	0.0130463	0.0703309
CACNB2	0.497481	0.498716	0.504292	0.00329594	0.499899	0.502762
CACNB3	0.12429	0.101037	0.0468542	0.0209829	0.0055851	0.0782183
CACNG6	0.0120691	0.00155973	0.00365724	0.00851001	0.139021	0.0491781
CACTIN	0.497481	0.0027614	0.0986769	0.00353204	0.000391787	0.0332087
CACUL1	0.000694332	0.00622627	2.68252e-07	0.0130963	0.0769603	6.49721e-05
CACYBP	0.133082	0.0926278	0.285411	0.0969718	0.0644289	0.0887674
CAD	0.222887	0.430305	0.0556982	0.123582	0.320728	0.0631304
CADM1	0.109899	0.0182502	0.000391476	0.0763593	0.0081525	5.16235e-06
CADM3	0.497481	0.498716	0.504292	0.000802157	0.499899	0.502762
CADM4	0.497481	0.00487804	0.504292	0.000531309	0.00705593	0.00570912
CADPS	0.0145731	0.498716	0.504292	0.00622219	0.00169512	0.00975912
CADPS2	0.497481	0.498716	0.504292	0.0360379	0.499899	0.502762
CALB1	0.497481	0.498716	0.504292	0.500008	0.499899	0.502762
CALB2	0.0504341	0.498716	0.15982	0.0206484	0.0326685	0.502762
CALCOCO1	7.39406e-05	0.0158366	6.60982e-05	0.00462928	0.00145399	0.00186841
CALCOCO2	0.000495608	0.498716	0.00584144	5.86487e-05	0.0150893	0.0131399
CALCRL	0.497481	0.000826262	0.0843773	0.0105212	0.499899	0.502762
CALD1	0.353172	0.245713	0.212844	0.220545	0.19944	0.258179
CALHM1	0.00296009	0.498716	0.504292	0.00248067	0.0040694	0.502762
CALML3	0.068925	0.326372	0.187784	0.100119	0.0855424	0.454574
CALML5	0.0540991	0.174141	0.0254723	0.0465894	0.00912331	0.00299981
CALN1	0.000438017	0.498716	0.00273944	0.500008	0.0036238	0.502762
CALR	0.251161	0.464728	0.410945	0.313688	0.353671	0.349958
CALU	0.530949	0.567658	0.534736	0.394478	0.570291	0.457306
CAMK1	0.207692	0.000207371	0.131459	0.0914014	0.251783	0.21689
CAMK1D	0.0140935	0.00482386	2.80926e-05	0.00245936	0.00627104	0.050878
CAMK2D	0.00314941	0.00661768	0.00195962	0.000375179	0.0246402	0.0412109
CAMK2G	0.190319	0.085488	0.203109	0.146405	0.158362	0.235547
CAMK4	0.497481	0.0988448	0.504292	0.500008	0.499899	0.502762
CAMKK2	0.497481	0.498716	0.504292	0.500008	3.50121e-05	0.502762
CAMKV	0.497481	0.498716	0.504292	0.00183752	0.499899	0.502762
CAMLG	0.497481	0.00182056	0.000787572	0.00812575	0.00571521	0.0116028
CAMP	0.207283	0.033813	0.245654	0.0595427	0.162615	0.0380351
CAMSAP1	0.0117021	0.00455601	0.0128034	0.0006896	0.000174553	0.0107403
CAMSAP2	0.0504341	0.498716	0.504292	0.0289219	0.000902977	0.502762
CAMSAP3	0.0542857	0.0985366	0.027264	0.00107237	0.00635139	0.0167246
CAMTA1	0.00282752	0.0130144	0.00797655	7.49897e-05	3.50121e-05	0.0598483
CAMTA2	0.011689	0.498716	0.00488617	7.87129e-05	0.0550576	0.0126059
CAND1	0.178541	0.0459713	0.154493	0.195283	0.119348	0.155756
CAND2	0.497481	0.498716	0.0313831	0.0442285	0.0190936	0.0580724
CANT1	0.0107631	0.0159767	0.0372737	0.0065233	0.0041872	0.0127073
CANX	0.280375	0.257393	0.161551	0.246542	0.451625	0.303247
CAP1	0.11237	0.0683736	0.0304474	0.118988	0.269794	0.0650184
CAP2	0.0201054	0.0381713	0.0351549	0.0719167	0.0100023	0.0595962
CAPG	0.000299039	0.0535665	0.0117996	0.00951531	0.04668	0.000279504
CAPN1	0.106347	0.0582093	0.233419	0.055827	0.0289183	0.125696
CAPN13	0.497481	0.498716	0.504292	0.500008	0.499899	0.502762
CAPN14	0.023964	0.0273181	0.0106385	0.0278653	0.0102625	0.0410832
CAPN15	0.00155608	0.498716	0.0448395	0.0085958	0.0491585	0.502762
CAPN2	0.120697	0.0322576	0.0416489	0.0176133	0.0261354	0.105639
CAPN5	0.0131851	0.00249822	0.000756678	0.00275639	0.499899	0.0164152
CAPN6	0.497481	0.498716	0.504292	0.500008	0.000145594	0.502762
CAPN7	0.0134047	0.0385706	0.0172543	0.00499637	0.0136833	9.32019e-05
CAPNS1	0.00451462	0.010381	0.00534143	0.000754102	0.0217643	6.57608e-06
CAPNS2	0.0296515	0.0365836	0.174362	0.0396334	0.0499482	0.190205
CAPRIN1	0.0556776	0.00307191	0.135239	0.135606	0.0572783	0.0164148
CAPRIN2	0.497481	0.498716	0.504292	0.00347406	0.00358407	0.502762
CAPS	0.00813525	0.0027614	0.00643016	0.014259	0.0109959	0.0102576
CAPZA1	0.169548	0.0313361	0.16512	0.0526872	0.210284	0.121995
CAPZA2	0.095854	0.0437195	0.406279	0.0503315	0.0502682	0.22816
CAPZB	0.00898843	0.000700978	0.0318934	0.00251715	0.000683489	0.0308551
CARD10	0.497481	0.498716	0.504292	0.0173346	0.0968769	0.502762
CARD11	0.497481	0.498716	0.504292	0.000103216	0.00918412	0.0563778
CARD14	0.0238305	0.0238091	0.0340202	0.0089822	0.0143395	0.000629474
CARD16	0.497481	0.0988448	0.504292	0.0105212	0.499899	0.124364
CARD17	0.497481	0.498716	0.00648774	0.004949	0.00117943	0.00122484
CARD18	0.000663366	0.00992733	9.17287e-05	9.99097e-05	0.018165	0.0158116
CARD6	4.46614e-05	0.00889976	0.00165965	0.000122358	0.00103683	0.502762
CARD8	0.0565169	0.25328	0.405137	0.175354	0.18356	0.337514
CARD9	0.025249	3.78924e-06	0.142968	0.000668924	0.0868456	0.00312185
CARHSP1	0.0223371	0.00144644	0.0389395	0.00292729	0.0500402	0.000168503
CARKD	0.0384873	0.00470717	0.000199023	0.0416761	0.00753375	0.0468526
CARM1	0.0133598	0.0259394	0.000506894	0.000627385	0.0148191	0.00475237
CARS	0.31165	0.0009413	0.181131	0.258706	0.21289	0.255391
CARS2	0.0536867	9.32358e-05	5.41189e-05	0.00853198	1.19168e-05	0.0818862
CASC1	0.497481	0.0381713	0.504292	0.500008	0.499899	0.502762
CASC3	0.00155608	0.498716	0.504292	0.0344341	0.000902977	0.0259146
CASC4	0.0612264	0.0027614	0.013546	0.0139162	0.000374539	0.000125166
CASC5	0.497481	0.498716	0.504292	0.500008	0.000902977	0.000122201
CASK	0.186575	0.00208371	0.298988	0.096937	0.034004	0.0179871
CASKIN1	0.497481	0.498716	0.504292	0.500008	0.499899	0.502762
CASKIN2	0.497481	0.498716	0.504292	0.000802157	0.499899	0.502762
CASP1	0.0266129	0.0128996	0.0166432	0.00653293	0.0136779	0.0495958
CASP10	0.0587828	0.0511716	0.00364689	0.0124741	0.0199291	0.0808235
CASP14	0.00391252	0.00481744	0.000255228	0.0125257	1.60374e-05	0.124
CASP2	0.497481	0.498716	0.504292	0.500008	3.50121e-05	0.502762
CASP3	4.79963e-05	0.0216628	0.0342958	0.0107632	0.0435413	0.0447272
CASP4	0.497481	0.00814986	0.0104183	0.123293	0.10852	0.00467847
CASP6	0.0447267	1.57914e-05	0.00390711	0.103045	0.00134114	0.0219976
CASP7	0.0449281	0.0290594	0.00314553	0.00688069	3.30854e-05	0.0465247
CASP8	0.150348	0.170265	0.200788	0.09897	0.101887	0.0659802
CASP8AP2	0.075099	0.00182056	0.000938156	0.0352127	0.0551464	0.179507
CASP9	0.0672063	0.498716	0.00793044	3.50547e-05	0.000145594	0.0259146
CAST	0.148854	0.149148	0.0803876	0.0362088	0.0352893	0.079596
CASZ1	0.0330726	0.00842061	0.000182587	0.000418541	5.88459e-05	0.00373848
CAT	0.0836745	0.190573	0.0813535	0.0900357	0.137622	0.268297
CAV1	0.0567933	0.0389769	0.16433	0.0759055	0.0238391	0.159013
CAV2	0.497481	0.498716	0.504292	0.500008	0.00154342	0.502762
CBFB	0.12263	0.00760693	0.0304532	0.0791364	0.113467	0.168984
CBL	0.0115808	0.0108809	0.246484	0.0975111	0.022519	0.122722
CBLB	0.497481	0.498716	0.00294904	0.000234378	0.00175425	0.502762
CBLC	0.00485194	0.0190123	0.000658938	0.000297606	0.00588951	0.00467847
CBLL1	0.000119616	0.024882	0.00648774	0.079395	0.0464043	0.0535648
CBR1	0.179916	0.00937596	0.306686	0.0515224	0.157514	0.0162571
CBR3	0.138039	0.0464425	0.143483	0.0210044	0.0938821	0.0249351
CBR4	0.084212	0.00301991	0.0253404	0.000611078	0.000209486	0.00242812
CBX1	0.0897926	0.00598793	0.376242	0.239244	0.199008	0.180084
CBX3	0.15727	0.125883	0.276386	0.197324	0.183823	0.156076
CBX5	0.093112	0.0140499	0.233222	0.0418874	1.46252e-07	0.00155341
CBX6	0.121797	0.498716	0.000596291	0.00892311	0.000571231	0.0340329
CBX8	0.00155608	7.95413e-06	0.504292	0.00347406	0.499899	0.00242895
CC2D1A	0.00335379	0.0232948	0.000296475	0.00168152	0.00484593	0.0052282
CC2D1B	0.00578182	0.000522926	0.000826334	0.00107845	0.00146919	9.91479e-05
CC2D2A	7.38301e-05	0.498716	0.504292	0.500008	0.499899	0.502762
CCAR1	0.152034	0.0321858	0.114706	0.294761	0.105949	0.166925
CCBL2	0.0049147	0.00218716	0.00873351	0.0173345	0.0103423	0.130622
CCDC101	0.497481	0.498716	0.504292	0.0086833	0.108532	0.502762
CCDC102A	0.0488644	0.0930551	0.0184938	0.00080159	0.00539986	6.49721e-05
CCDC102B	0.497481	0.498716	0.504292	0.00197112	0.499899	0.502762
CCDC104	0.497481	0.498716	0.0114037	0.500008	0.499899	0.502762
CCDC108	0.497481	0.498716	0.504292	0.0105212	0.499899	0.502762
CCDC109B	0.497481	0.498716	0.504292	0.500008	0.0129543	0.502762
CCDC11	0.497481	0.000355841	0.504292	0.0360379	0.499899	0.502762
CCDC114	0.0131851	0.498716	0.504292	0.500008	0.499899	0.502762
CCDC115	0.0630798	0.00459222	0.0122831	0.000402368	0.00745467	0.0302778
CCDC116	0.00155608	0.498716	0.504292	0.500008	0.499899	0.502762
CCDC117	0.497481	0.498716	0.000596291	0.00719744	0.000902977	0.00714369
CCDC12	0.00857162	0.0255473	0.00808414	0.0859733	0.0732465	0.0640142
CCDC120	0.0131851	0.498716	0.00815571	0.00326981	0.0104343	0.00316181
CCDC124	0.110134	0.0141054	0.031955	0.000187855	0.0701636	0.023345
CCDC126	0.497481	0.0190123	0.00406151	3.36452e-07	0.00477768	0.00330628
CCDC127	0.497481	0.498716	0.504292	0.00347406	0.499899	0.502762
CCDC132	0.0189291	0.0091864	0.000351886	0.0472612	0.0257556	0.00146091
CCDC134	0.017427	0.000130661	0.258607	0.0144003	0.000323373	0.0044461
CCDC136	0.497481	0.498716	0.504292	0.0109944	0.0034599	0.000122201
CCDC137	0.0652445	0.498716	3.32085e-06	0.00661134	0.00384856	0.0990725
CCDC14	0.0131851	0.498716	0.0167404	0.000189846	0.00705593	0.0158116
CCDC141	0.000682393	0.00441857	0.504292	0.00340752	0.0010163	0.0112054
CCDC146	0.497481	0.498716	0.504292	0.500008	0.00606069	0.502762
CCDC147	0.497481	0.498716	0.504292	0.500008	0.00175425	0.502762
CCDC149	0.497481	0.498716	0.504292	0.000189846	0.00705593	0.502762
CCDC15	0.497481	0.498716	0.504292	0.00329594	0.499899	0.502762
CCDC150	0.497481	0.498716	0.504292	0.000891221	0.499899	0.502762
CCDC151	0.00155608	0.00854786	0.000280681	0.00319128	0.00264011	6.49721e-05
CCDC152	0.497481	0.0988448	0.504292	0.500008	0.499899	0.502762
CCDC153	0.0652445	0.498716	0.504292	0.500008	0.499899	0.502762
CCDC154	0.014273	0.498716	0.504292	0.000174291	0.499899	0.0208049
CCDC155	0.00705124	0.498716	0.504292	0.500008	0.499899	0.502762
CCDC157	0.497481	0.498716	0.0543058	0.000122241	0.00705593	0.502762
CCDC158	0.497481	0.498716	0.504292	0.500008	0.499899	0.502762
CCDC167	0.497481	0.498716	0.504292	0.500008	0.00230716	0.502762
CCDC168	0.0016661	0.000634183	0.00665682	0.000788876	0.0503666	0.00474182
CCDC171	0.497481	0.00582983	0.504292	0.500008	0.0345033	0.502762
CCDC173	0.0102326	0.498716	0.504292	0.0143438	0.499899	0.502762
CCDC178	0.497481	0.498716	0.0401186	0.0168537	0.0142318	0.0113698
CCDC18	0.497481	0.00182056	0.504292	0.500008	0.499899	0.502762
CCDC22	0.0788227	0.00191372	0.0557985	0.063402	0.0960878	0.0882506
CCDC25	3.31535e-05	0.00417702	0.336566	0.0011741	0.00527567	0.104264
CCDC27	0.497481	0.498716	0.504292	0.000189846	0.499899	0.502762
CCDC37	0.497481	0.498716	0.504292	0.500008	0.499899	0.00765875
CCDC38	0.00705124	0.498716	0.504292	0.500008	0.499899	0.502762
CCDC39	0.066983	0.498716	0.504292	0.000956092	0.0491585	0.112792
CCDC41	0.00705124	0.000355841	0.504292	0.00276491	0.00435815	0.502762
CCDC43	0.0125565	0.0082555	0.0771717	0.00106399	0.00274529	4.1179e-05
CCDC47	0.115716	0.000213574	0.0937948	0.10113	0.1695	0.0967046
CCDC50	0.0765058	0.490542	0.0654081	0.121111	0.0577079	0.240885
CCDC51	0.017427	0.498716	0.0509856	0.00111487	2.08294e-06	0.502762
CCDC53	0.0395316	0.00314652	0.0102804	0.101257	0.00484198	0.0309063
CCDC57	0.497481	0.498716	0.504292	0.00197112	3.50121e-05	0.502762
CCDC58	0.0283604	0.000475384	0.102927	0.0308489	0.00986837	0.00115412
CCDC59	0.497481	0.498716	0.504292	0.0417714	0.499899	0.502762
CCDC6	0.00251485	0.106795	1.6026e-05	0.0256804	0.00342338	0.121842
CCDC63	0.497481	0.498716	0.504292	0.500008	0.0129543	0.502762
CCDC64B	0.316731	0.380239	0.24021	0.285682	0.340648	0.393447
CCDC66	0.497481	0.498716	0.504292	0.0114944	0.00429832	0.502762
CCDC70	0.497481	0.498716	0.504292	0.500008	0.00705593	0.0158116
CCDC71L	0.00155608	0.498716	0.504292	0.00347406	0.000571231	0.502762
CCDC78	0.0324564	0.0130144	0.504292	0.00838394	0.00848046	0.0158116
CCDC8	0.497481	0.498716	0.504292	0.0479279	0.499899	0.502762
CCDC80	0.497481	0.498716	0.00294904	0.500008	0.499899	0.00467847
CCDC83	0.0632758	0.0988448	0.0231001	0.00535657	0.0374282	0.113897
CCDC85C	0.00753699	0.498716	0.504292	0.000189846	0.000976127	0.502762
CCDC86	0.497481	0.0027614	0.504292	0.500008	3.50121e-05	0.502762
CCDC87	0.497481	0.498716	0.504292	0.00159218	0.499899	0.000122201
CCDC88A	0.497481	0.0190123	0.000596291	0.0479279	0.0331269	0.0716888
CCDC88B	0.0197525	0.0864877	0.139628	0.13621	0.0292348	0.28653
CCDC88C	0.0535649	0.0247896	0.0306922	0.000114975	0.0144716	0.0177335
CCDC89	0.0131851	0.498716	0.504292	0.00188949	0.499899	0.502762
CCDC9	0.0339063	0.0094922	0.0366884	0.0523376	0.00083338	0.0297281
CCDC90B	0.0525884	0.00466477	0.0667257	0.0247033	0.00323846	0.122959
CCDC91	0.497481	0.498716	0.000596291	0.500008	0.499899	0.502762
CCDC92	0.497481	0.0027614	0.504292	0.0360379	0.00435815	0.502762
CCDC93	0.00503283	0.0033064	0.211426	0.0572465	0.0172184	0.0218921
CCDC94	0.00108289	0.0365853	0.00856834	0.0103388	8.40804e-05	0.00064581
CCDC97	0.497481	0.498716	0.504292	0.00197112	0.499899	0.502762
CCHCR1	0.497481	0.498716	0.504292	0.0417714	0.499899	0.502762
CCKBR	0.497481	0.498716	0.504292	0.00329594	0.499899	0.502762
CCL16	0.0102326	0.0130144	0.0344147	0.00329594	0.000145594	0.0107403
CCL19	0.017427	0.0933794	0.027096	0.01036	0.000145594	0.0476658
CCL20	0.497481	0.498716	0.504292	0.500008	0.499899	0.502762
CCL21	0.497481	0.498716	0.504292	0.0417714	0.499899	0.502762
CCM2	0.497481	0.498716	0.504292	0.0173346	0.499899	0.0107403
CCM2L	0.497481	0.498716	0.504292	0.500008	0.000902977	0.502762
CCNA2	0.497481	0.498716	0.504292	0.0417714	0.499899	0.00467847
CCNB1	0.06344	0.498716	0.059529	0.500008	0.499899	0.502762
CCNB1IP1	0.0131851	0.498716	0.504292	0.500008	0.499899	0.502762
CCNB2	0.497481	0.498716	0.504292	0.00088039	0.499899	0.502762
CCND1	0.497481	0.498716	0.504292	0.500008	0.499899	0.502762
CCND2	0.497481	0.498716	0.504292	0.000802157	0.00705593	0.502762
CCNDBP1	0.0652445	0.498716	0.00294904	0.00347406	0.00217235	0.502762
CCNH	0.0600843	3.83313e-05	0.0593394	0.042879	0.0302096	1.82809e-05
CCNK	0.0178028	0.0104167	0.0954131	0.0525289	0.0836071	0.00121642
CCNL1	0.497481	0.498716	0.00256648	0.000189846	0.0345033	0.502762
CCNT1	0.0638855	0.498716	0.504292	5.85944e-07	3.50121e-05	0.502762
CCNT2	0.497481	0.000826262	0.504292	0.500008	0.499899	0.0107403
CCNY	0.0349127	0.0284572	0.00276014	0.00509595	0.0366126	0.0358651
CCNYL1	0.0266587	0.498716	0.0158784	4.91649e-05	0.00704803	0.502762
CCP110	0.497481	0.498716	0.504292	0.500008	0.0491585	0.502762
CCPG1	0.497481	0.498716	0.504292	0.0360379	0.499899	0.502762
CCR7	0.497481	0.498716	0.504292	0.000802157	0.499899	0.502762
CCRN4L	0.497481	0.498716	0.504292	0.500008	0.000145594	0.502762
CCS	0.102509	0.132791	0.049719	0.0189997	0.00902112	0.3787
CCSER2	0.497481	0.498716	0.504292	0.000189846	0.499899	0.502762
CCT2	0.0423579	0.0175641	0.0238455	0.0560906	0.0482501	0.0191479
CCT3	0.073822	0.0092136	0.0338304	0.0400147	0.0534099	0.00668683
CCT4	0.0389202	0.0242238	2.94675e-05	3.8215e-07	0.0248442	0.000162001
CCT5	0.0089487	0.0106256	0.0159843	0.0154899	0.118496	0.00439502
CCT6A	0.0776054	0.00925254	0.000776918	0.0206438	0.178419	0.0504327
CCT6B	0.01904	0.498716	0.000976921	0.029129	0.00336842	0.0151855
CCT7	0.0527397	0.013827	0.00163132	0.0609152	0.218439	0.0188657
CCT8	0.00638077	0.0092068	0.101271	6.67949e-05	0.00380828	0.00766349
CD109	0.0815261	0.0540788	0.00653336	0.00613371	0.0168747	0.0190449
CD14	0.13224	0.164146	0.179932	0.280113	0.279655	0.415897
CD151	0.100349	0.0027614	0.000569911	0.000927852	0.0037034	7.15955e-05
CD163	0.119946	0.6227	0.31482	0.18042	0.304112	0.385565
CD163L1	0.497481	0.498716	0.504292	0.000234378	0.499899	0.0021428
CD180	0.497481	0.498716	0.504292	0.500008	0.00918412	0.502762
CD19	0.497481	0.000826262	0.13258	0.0312294	0.0374474	0.0396847
CD1A	0.0299283	0.0190123	0.0111927	0.00980826	0.00656071	0.00209192
CD207	0.0341848	0.000355029	0.0654215	0.0107503	0.0167271	0.0109306
CD209	0.497481	0.498716	0.504292	7.19576e-05	0.499899	0.502762
CD22	0.497481	0.498716	0.504292	0.0342983	0.0139183	0.101764
CD226	0.497481	0.498716	0.504292	0.0417714	0.000113541	0.000738507
CD247	0.497481	0.498716	0.13631	0.0062805	0.0491585	0.502762
CD248	0.497481	0.498716	0.504292	0.162385	0.0305312	0.0605555
CD27	0.189132	0.0306894	0.329959	0.0724589	0.276305	0.261235
CD274	0.497481	0.498716	0.504292	0.00297856	0.0352547	0.502762
CD276	0.00705124	0.498716	0.000596291	0.500008	0.499899	0.502762
CD28	0.497481	0.498716	0.0167404	0.500008	0.499899	0.502762
CD2AP	0.00200167	0.0260653	0.0843165	0.0587919	0.0388614	0.201712
CD2BP2	0.0709599	0.0044509	0.178955	0.115585	0.0987691	0.0682155
CD300A	0.0834017	0.0789936	0.0796256	0.209905	0.129264	0.0196971
CD34	0.000495608	0.498716	0.504292	0.0017706	0.000498982	0.502762
CD36	0.116283	0.00134669	2.77457e-05	0.0192605	0.000163643	6.49721e-05
CD37	0.497481	0.498716	0.504292	5.85944e-07	0.499899	0.502762
CD38	0.0017348	0.0012381	0.000613043	0.019156	0.0342052	0.0955307
CD3D	0.0504341	0.498716	0.504292	0.500008	0.00230716	6.49721e-05
CD3E	0.497481	0.498716	0.504292	0.00275576	0.499899	0.502762
CD3EAP	0.497481	0.00441857	0.504292	0.00111016	0.0129543	0.0107403
CD4	0.497481	0.498716	0.504292	0.000234802	0.0526019	0.0501697
CD44	0.0237117	0.0102228	0.000430537	0.00820164	0.041001	0.0085681
CD47	0.0205568	0.000579954	0.000154247	0.00188834	7.19428e-05	5.26162e-05
CD48	0.0612997	0.000826262	0.14102	0.12877	0.0402836	0.148458
CD5	0.497481	0.498716	0.504292	0.500008	0.00358407	0.502762
CD53	0.497481	0.498716	0.504292	0.500008	0.066401	0.00714369
CD55	0.0298639	0.0142108	0.000892029	0.0262252	0.00252446	0.0396007
CD58	0.497481	0.498716	0.00256648	0.500008	0.499899	0.502762
CD59	0.497481	0.0130144	0.504292	1.76807e-05	0.499899	0.502762
CD5L	0.0644267	0.498716	0.504292	0.000492532	0.00745084	0.502762
CD63	0.497481	0.00182056	0.504292	0.00375287	0.0454421	0.00121401
CD68	0.497481	0.498716	0.504292	0.500008	0.499899	0.502762
CD70	0.497481	0.0590408	3.32085e-06	0.500008	0.00606069	0.502762
CD72	0.497481	0.000355841	0.504292	0.500008	0.499899	0.502762
CD74	0.118241	0.330356	0.107765	0.166496	0.16576	0.342785
CD79A	0.497481	0.498716	0.504292	0.500008	0.499899	0.00765875
CD79B	0.497481	0.0046276	0.504292	0.500008	0.499899	0.502762
CD81	0.0210273	0.000111299	0.110883	0.069672	0.0515762	0.290281
CD82	0.00405277	0.0602765	0.0107207	0.00520995	0.0224628	0.00413859
CD84	0.497481	0.498716	0.504292	0.500008	0.499899	0.0563778
CD8A	0.00162459	0.00182056	0.184586	0.0911791	0.0881288	0.195027
CD8B	0.497481	0.498716	0.504292	0.00183752	0.499899	0.502762
CD9	0.00121538	0.0402486	0.0314829	0.0166819	0.0256333	0.0568505
CD93	0.497481	0.498716	0.504292	0.000189846	0.499899	0.502762
CD97	0.0525257	0.303519	0.320844	0.256731	0.242627	0.49823
CD99	0.00705124	0.00814986	0.504292	0.00548867	0.0127306	0.0396847
CD99L2	0.0668423	0.0132074	0.135879	0.0258334	0.00377149	0.0248749
CDA	0.497481	0.498716	0.504292	0.500008	0.499899	0.502762
CDAN1	0.497481	0.498716	0.0253671	0.000189846	0.000145594	0.0021428
CDC123	0.497481	0.0121789	0.000596291	0.0204503	0.00249207	0.000591163
CDC16	0.00151968	0.010758	0.180378	0.0131382	0.000701649	0.0830673
CDC20	0.000495608	0.498716	0.504292	0.500008	0.499899	0.502762
CDC23	0.0697715	0.00411403	0.00230223	0.015051	7.69011e-06	0.0700814
CDC25A	0.497481	0.498716	0.504292	0.00329594	0.499899	0.502762
CDC26	0.00689683	0.112526	0.10319	0.0424149	0.0883543	0.0840845
CDC27	0.131688	0.000935178	0.00153249	0.067312	0.00543435	0.0107403
CDC34	0.0102326	0.498716	0.504292	0.000189846	0.499899	0.502762
CDC37	0.0103815	0.0608375	0.0425252	0.0378871	0.04276	0.0384258
CDC37L1	0.00155501	0.498716	0.115799	0.00407602	0.499899	0.502762
CDC40	0.000177902	0.00834535	0.334396	0.069871	0.0197796	0.0632631
CDC42	0.0130636	0.120286	0.178467	0.0810102	0.0637313	0.11516
CDC42BPA	0.127228	0.00182056	0.283911	0.0281369	0.00220536	0.0588
CDC42BPB	0.0144054	0.0257724	0.0922061	0.0250795	0.0617594	0.00802795
CDC42BPG	0.0197451	0.0226119	0.0389153	0.000403934	0.00648207	0.0249629
CDC42EP1	2.14247e-05	8.4631e-05	0.000815727	0.0052039	0.000204948	0.00558765
CDC42EP4	0.0701495	0.00579729	0.04833	0.0637344	0.016029	0.121173
CDC42EP5	0.0389083	0.00743573	0.000668509	0.00145419	0.123297	0.00350439
CDC42SE2	0.143526	0.498716	0.504292	0.00124858	0.499899	0.0396847
CDC45	0.497481	0.0480394	0.504292	0.500008	0.499899	0.502762
CDC5L	0.103459	0.323628	0.39714	0.35678	0.213017	0.116728
CDC7	0.00705124	0.498716	0.504292	0.00329594	0.499899	0.502762
CDC73	0.122481	0.0859703	0.0993946	0.158474	0.42842	0.0648462
CDCA2	0.497481	0.498716	0.000596291	0.000851969	0.00432329	0.0380457
CDCA3	0.497481	0.498716	0.104628	0.0124341	0.499899	0.0563778
CDCA4	0.497481	0.498716	0.504292	0.0417714	0.499899	0.502762
CDCA5	0.117137	0.498716	0.000596291	0.0436034	0.499899	6.49721e-05
CDCA8	0.00145358	0.498716	0.504292	0.034032	3.50121e-05	0.502762
CDCP1	0.0329115	0.0178474	0.0341499	0.0144027	0.0286292	0.0403448
CDH1	0.0403621	0.130407	0.159259	0.144884	0.134717	0.238496
CDH11	0.361174	0.0875467	0.470576	0.092261	0.0265217	0.119271
CDH12	0.497481	0.498716	0.504292	0.00183752	0.499899	0.502762
CDH13	0.0177578	0.00279008	0.0360029	0.0667995	0.0463419	0.00131486
CDH24	0.497481	0.00441857	0.504292	0.500008	0.499899	0.502762
CDH26	0.497481	0.00182056	0.000243546	0.0172546	0.0470024	0.0190752
CDH3	0.218977	0.0468741	0.00357079	0.00106546	0.000853749	0.000944447
CDH5	0.0720336	0.0137438	0.0861911	0.066808	0.11943	0.0161782
CDH6	0.497481	0.498716	0.504292	0.0173346	0.499899	0.502762
CDH8	0.497481	0.498716	0.504292	0.500008	0.000902977	0.502762
CDH9	0.497481	0.498716	0.504292	0.000234378	0.499899	0.502762
CDIPT	0.119577	0.0845462	0.193357	0.131324	0.173159	0.188479
CDK1	0.00492622	0.00450952	0.00361143	0.01921	0.0126471	0.00327124
CDK11B	0.497481	0.498716	0.504292	5.85944e-07	0.499899	0.502762
CDK12	0.0528298	0.0524213	0.0139243	0.00358091	0.000305748	0.0362787
CDK13	0.00282141	0.00182056	0.504292	0.000330617	0.0486373	0.00181283
CDK15	0.497481	0.498716	0.504292	0.500008	0.499899	0.502762
CDK16	0.497481	0.498716	0.504292	0.500008	0.499899	0.502762
CDK18	0.497481	0.498716	0.000596291	0.500008	0.499899	0.502762
CDK2	0.0521365	0.00129713	0.0261493	0.0657577	0.0221503	0.0393532
CDK20	0.00705124	0.498716	0.504292	0.000189846	0.499899	0.502762
CDK2AP1	0.0737741	0.0168793	0.000279884	0.0500575	0.114443	0.0615684
CDK4	0.0512707	0.0106352	0.000200384	0.0504405	0.00532003	0.0418592
CDK5	0.101742	0.00544432	0.283221	0.0179337	0.029738	0.0184178
CDK5RAP1	0.497481	0.498716	0.504292	0.00369488	0.00358407	0.502762
CDK5RAP2	0.0083397	0.498716	0.001371	0.0201685	0.00814108	0.0116753
CDK5RAP3	0.0216299	0.0930723	0.000953573	0.0314529	0.0141366	0.0892137
CDK6	0.00636759	0.012393	0.0784979	0.0828191	0.00970084	0.0388058
CDK7	0.015423	0.0317349	0.000653638	0.00234506	0.115954	0.00743752
CDK9	0.168126	0.00851283	0.104895	0.173911	0.0241669	0.0516658
CDKAL1	0.497481	0.0130144	0.00152638	0.00699784	3.76351e-09	7.36894e-05
CDKL1	0.497481	0.00675398	0.0575754	0.00628474	0.0102655	0.116374
CDKL5	0.497481	0.498716	0.504292	0.500008	0.00175425	0.502762
CDKN1A	0.00155608	0.498716	0.504292	6.9945e-05	0.00230716	0.502762
CDKN1B	0.00199138	5.6686e-07	0.11469	0.00825073	0.00284289	0.105826
CDKN1C	0.497481	0.498716	0.504292	0.00347406	0.499899	0.502762
CDKN2A	0.000186107	0.0154417	0.000363621	0.0204541	2.28101e-07	0.00569666
CDKN2AIP	0.00017774	0.00171429	0.0818424	0.00870858	0.00442625	0.0128502
CDKN2AIPN	0.497481	0.498716	0.504292	0.000335445	0.499899	0.000122201
CDKN2B	0.0131851	0.498716	0.0106385	0.000802157	0.0078284	0.00467847
CDR2	0.497481	0.498716	0.504292	0.00197112	0.499899	0.502762
CDR2L	0.497481	0.498716	0.504292	0.500008	0.499899	0.502762
CDRT4	0.497481	0.498716	0.504292	0.500008	0.000145594	0.502762
CDS2	0.286739	0.119451	0.157253	0.154928	0.215157	0.176041
CDSN	0.0248174	0.127668	6.65417e-06	3.12222e-05	0.0010458	0.0130007
CDT1	0.00155608	0.498716	0.0106385	0.500008	0.499899	0.502762
CDV3	0.187665	0.0905731	0.213	0.271442	0.314823	0.171986
CDYL	0.497481	0.498716	0.504292	0.000189846	0.499899	0.502762
CEACAM1	2.73826e-05	0.0193476	0.0135865	0.011302	0.00537554	0.0186784
CEACAM5	0.164068	0.000407434	0.119047	0.0768975	0.001528	0.104938
CEACAM6	0.0435119	0.128737	0.0306262	1.5073e-05	0.179674	0.012569
CEACAM7	0.0131851	0.498716	0.504292	0.500008	0.00705593	0.502762
CEACAM8	0.0972305	0.101808	0.0352582	0.0511296	0.102281	0.00057418
CEBPB	0.497481	0.498716	0.504292	0.00506682	0.499899	0.0772982
CEBPD	0.497481	0.498716	3.32085e-06	0.500008	0.499899	0.502762
CEBPZ	0.0229985	0.0286572	0.0930497	0.0689589	0.0750135	0.0313363
CECR1	0.0504341	0.0410046	0.504292	0.0121049	0.00358407	0.502762
CECR5	0.22873	0.201061	0.161177	0.040523	0.196103	0.0026785
CEL	0.497481	0.498716	0.504292	0.13544	0.00473133	0.0208628
CELF1	0.000315306	0.00364069	0.0786902	0.035013	0.000288829	0.0278057
CELF2	0.0265744	0.498716	0.504292	0.0295434	0.00609609	0.502762
CELF4	0.497481	0.498716	0.504292	0.000802157	0.499899	0.502762
CELSR1	0.0373766	0.00581578	0.0162523	0.0106902	0.0258517	0.00221766
CELSR2	0.000158365	0.0150861	0.00486411	0.00186511	0.000254441	0.000133037
CENPA	0.497481	0.498716	0.504292	0.000802157	0.499899	0.502762
CENPB	0.0614601	0.00495684	0.0913368	0.0567668	0.00103278	0.0101105
CENPC1	0.0396886	0.0480394	0.00414649	0.00889108	0.0517118	0.0335457
CENPE	0.010861	6.99566e-07	0.504292	0.00733725	0.00306455	0.0107403
CENPF	0.0169608	0.0190123	0.504292	0.00237555	0.499899	0.0333125
CENPH	0.497481	0.498716	0.00648774	0.00329594	0.499899	0.502762
CENPJ	0.0201497	0.0795235	0.13631	0.00874162	0.0752664	0.00038709
CENPN	0.497481	0.498716	0.193687	0.00205658	0.000145594	0.0107403
CENPQ	0.497481	0.498716	0.504292	0.00540006	0.499899	0.502762
CENPV	0.497481	0.498716	0.504292	0.00262162	0.499899	6.49721e-05
CEP104	0.000495608	0.0369255	0.0110861	0.0375566	0.198936	0.00427787
CEP112	0.0276664	0.498716	0.504292	2.19312e-05	0.00431566	0.00750555
CEP128	0.017427	0.498716	0.504292	0.500008	0.000145594	0.502762
CEP135	0.497481	0.498716	0.504292	0.500008	0.499899	0.502762
CEP170	0.497481	0.0381713	0.00294904	0.0155396	0.00651355	0.0815669
CEP170B	4.8188e-05	0.0101703	6.94204e-05	0.00497354	0.00198958	0.0010839
CEP192	0.00155608	0.498716	0.0448395	0.500008	0.499899	0.000434348
CEP250	0.0106312	0.00182056	0.00311239	0.00322957	5.48618e-05	0.00799982
CEP290	0.00490977	0.00269879	0.00342385	0.00407951	0.031126	0.0462724
CEP350	0.000495608	0.0183873	0.504292	0.000234378	0.000106477	0.502762
CEP41	0.497481	0.498716	0.504292	0.0294815	0.000145594	0.502762
CEP44	0.497481	0.498716	0.100386	0.00106403	0.000613777	0.0476658
CEP55	0.497481	0.498716	0.504292	0.500008	0.000902977	0.502762
CEP57L1	0.497481	0.498716	0.504292	0.500008	0.000145594	0.502762
CEP63	0.497481	0.0130144	0.504292	0.000802157	0.00230716	0.00312267
CEP76	0.497481	0.498716	0.000596291	0.000327577	0.499899	0.502762
CEP89	0.02604	0.000826262	0.0051212	0.00107545	0.000100521	0.00011449
CEP97	0.497481	0.498716	0.504292	0.00183752	0.00230716	0.502762
CEPT1	0.0361805	0.162682	0.0797995	0.116761	0.249132	0.0605184
CERCAM	0.497481	0.498716	0.504292	0.500008	0.499899	0.502762
CERKL	0.497481	0.498716	0.504292	0.00329594	0.499899	0.502762
CERS2	0.0459622	0.00296471	0.443957	0.0645939	0.0258173	0.0574401
CERS3	0.0223532	0.000790113	0.0535248	0.0149711	0.0315184	0.100153
CERS4	0.00155608	0.0190123	0.504292	0.00478787	0.000902977	0.502762
CES1	0.0800603	0.000346136	0.267623	0.00464132	0.21635	0.0124279
CES2	0.326834	0.448742	0.301532	0.207011	0.250681	0.402698
CETN2	0.0266419	0.0699909	0.193892	0.0631409	0.208244	0.0273641
CETP	0.497481	0.0190123	0.504292	0.00197112	0.499899	6.49721e-05
CFB	0.000198122	0.00448921	0.00774011	0.00838815	1.64008e-07	0.053407
CFD	0.0406749	0.00959395	0.00564809	0.00514906	0.00616373	0.00901538
CFDP1	0.0464596	0.0220546	0.164741	0.0219831	0.00827889	0.125029
CFH	0.00724985	0.0857329	0.0200932	0.032511	0.0654895	0.036616
CFHR5	0.497481	0.498716	0.504292	0.500008	0.499899	0.502762
CFI	0.00619798	0.00161146	0.0122698	0.0585544	0.0247599	0.00788577
CFL1	0.250704	0.422753	0.266258	0.268897	0.367318	0.100945
CFL2	0.119769	0.0534644	0.109324	0.0239325	0.0140505	0.0231164
CGGBP1	0.00705124	0.000494057	0.168648	0.0314233	8.204e-06	0.012349
CGN	0.0837902	0.000987688	0.0784921	0.00346961	0.0351156	0.135258
CGNL1	0.00869779	0.0204367	0.0167404	0.00340927	0.0124648	0.502762
CGREF1	0.497481	0.498716	0.504292	0.000534612	0.000951188	6.87632e-08
CHAC2	0.497481	0.498716	0.504292	0.00347406	0.499899	0.502762
CHADL	0.497481	0.0201201	0.000596291	0.0498949	0.00327617	0.502762
CHAF1A	0.00155608	0.498716	0.000725269	0.0615836	3.50121e-05	0.00133245
CHAF1B	0.497481	0.00172933	0.504292	0.00229449	0.00620033	0.502762
CHAMP1	0.0402345	0.00575551	0.242772	0.156214	0.0896437	0.0192483
CHAT	0.017427	0.498716	0.504292	0.500008	0.499899	0.502762
CHCHD1	0.00762056	0.00367156	5.97797e-06	0.0138238	0.00342818	0.00294922
CHCHD2	0.497481	0.0027614	0.504292	0.0473572	0.00139102	0.502762
CHCHD3	0.0871762	0.0406303	0.0569068	0.02038	0.0424251	0.093725
CHCHD4	0.0102326	0.498716	0.00474148	8.68249e-05	0.00886836	0.0225556
CHCHD5	0.497481	0.498716	0.504292	0.500008	0.00705593	0.502762
CHCHD6	0.039033	0.498716	1.37874e-05	0.0396573	0.019087	0.502762
CHD2	0.00305894	0.0474908	0.0003552	0.0545175	0.0423867	0.000183757
CHD3	0.125947	0.498716	0.0950441	0.00946687	0.000151923	0.502762
CHD4	0.110094	0.0172736	0.00521626	0.00232099	0.0652959	0.00986369
CHD5	0.497481	0.498716	3.32085e-06	0.500008	0.499899	0.502762
CHD7	0.497481	0.498716	0.504292	5.85944e-07	0.00230716	0.502762
CHD8	0.497481	0.498716	0.504292	5.85944e-07	0.0222681	0.0107403
CHDH	0.497481	0.142794	0.504292	0.0408628	0.10569	0.0563778
CHEK1	0.0102326	0.498716	0.504292	0.0235215	0.000145594	0.00242895
CHEK2	0.497481	0.0988448	0.000596291	0.00215807	0.499899	0.502762
CHERP	0.180083	0.111058	0.107223	0.213124	0.217399	0.0971166
CHI3L1	0.497481	0.498716	0.504292	0.00183752	0.499899	0.502762
CHI3L2	0.497481	0.498716	0.504292	4.36947e-05	0.499899	0.502762
CHIA	0.497481	0.498716	0.00648774	0.500008	0.499899	0.502762
CHIC2	0.497481	0.000826262	0.139702	0.0032951	0.0399232	0.00883233
CHID1	0.191392	0.18045	0.0793455	0.0500228	0.0976264	0.127499
CHIT1	0.0265253	0.498716	0.504292	0.0479279	3.50121e-05	0.502762
CHKB	0.00866481	0.0909926	0.504292	0.0818701	0.0739014	0.0871997
CHL1	0.0445636	0.0216165	0.00451611	0.00477356	0.000335601	0.00233889
CHM	0.000160184	0.000182791	0.0752777	0.0349618	0.0141107	0.00695651
CHMP1A	0.00705124	0.498716	0.504292	0.000802157	0.0574312	0.0192076
CHMP1B	0.497481	0.0480394	0.504292	0.0628382	0.0843536	0.0902911
CHMP2A	0.000438404	0.0339995	0.00218815	0.00195484	0.113221	0.0319975
CHMP2B	0.0236321	0.0130144	0.00241879	0.00211985	0.0184386	0.00856189
CHMP3	0.0504341	0.498716	0.504292	0.500008	0.499899	0.502762
CHMP4A	0.00516808	0.00231963	0.188562	0.0150064	0.000156811	0.0322501
CHMP4B	5.04734e-05	0.00963886	0.0164084	0.00105046	0.00280997	0.0306334
CHMP4C	2.37093e-06	0.128883	0.0159331	0.0150134	0.0302189	0.0345493
CHMP5	7.38301e-05	0.498716	0.123785	0.00665241	0.0125513	1.30442e-05
CHMP6	1.37919e-05	0.00347177	0.00077459	0.019522	0.00031092	0.00500234
CHMP7	0.0711035	0.00167295	0.179775	0.0377274	0.076512	0.0945838
CHORDC1	0.0320549	0.0147258	0.0639397	0.0769878	0.00219484	0.0613195
CHP1	0.107875	0.00993851	0.0160458	0.0525223	0.0808643	0.00112038
CHP2	0.497481	0.498716	0.504292	0.000189846	0.499899	0.502762
CHPF	0.143526	0.498716	0.0448395	0.00288843	0.499899	0.0531298
CHPF2	0.000495608	0.498716	0.504292	0.500008	0.499899	0.502762
CHPT1	0.497481	0.498716	0.504292	0.500008	0.000902977	0.502762
CHRAC1	0.0143652	0.0562198	0.0540766	0.0063456	0.0786899	0.0274216
CHRNB4	0.497481	0.0190123	0.00256648	0.00329594	0.00435815	0.502762
CHST11	0.0131851	0.0190123	0.00954599	0.00183373	0.0601468	0.00574877
CHST12	0.497481	0.498716	0.504292	0.500008	0.499899	0.0324343
CHST14	0.0136084	0.0410762	0.14725	0.0511688	0.0111007	0.0353483
CHST2	0.497481	0.498716	0.504292	0.000891221	0.499899	0.502762
CHST3	0.497481	0.498716	0.504292	5.85944e-07	0.000902977	0.502762
CHSY1	0.497481	0.498716	0.504292	0.00347406	0.499899	0.502762
CHTF18	0.0205912	0.00291195	3.32085e-06	0.038555	0.0539149	0.0135683
CHTOP	0.0539706	0.104034	0.282463	0.120759	0.0637321	0.107391
CHUK	0.195683	0.0335288	0.00472855	0.00700129	0.0315048	0.0496646
CHURC1	0.00138542	0.00043505	0.000395558	0.00019478	0.000105351	0.0131853
CIAO1	0.497481	0.0218348	0.0100359	0.0658098	0.0733051	0.0520251
CIAPIN1	0.0104598	0.0655893	0.00524193	0.00105829	0.0173864	0.00608969
CIB1	0.0123829	0.0682421	0.315416	0.0146053	0.147689	0.059917
CIB2	0.497481	0.498716	0.504292	0.00183752	0.499899	0.502762
CIB3	0.497481	0.498716	0.504292	0.500008	0.499899	0.00714369
CIC	0.497481	0.498716	0.504292	0.500008	0.499899	0.502762
CIITA	0.497481	0.498716	0.504292	0.00329594	0.00230716	0.502762
CILP	0.0515481	0.110565	0.00242005	0.00157842	0.117506	0.0155684
CILP2	0.017427	0.498716	0.504292	0.500008	0.499899	0.502762
CINP	0.497481	0.498716	0.504292	5.85944e-07	0.499899	0.502762
CIR1	0.497481	0.498716	0.504292	0.00540006	0.499899	0.502762
CIRBP	0.292699	0.00582553	0.0386134	0.120439	0.208977	0.073034
CIRH1A	0.0258091	0.00320901	0.00804295	0.0293506	0.0305925	0.00959683
CISD1	0.00676302	0.00201107	0.044851	0.0338468	0.000946088	0.0107721
CISD2	0.207079	0.280687	0.377296	0.207637	0.112789	0.0989286
CIT	0.497481	0.498716	0.504292	0.0043722	0.000902977	0.502762
CIZ1	0.000997422	0.0874361	0.000362084	0.0135077	3.0916e-05	0.00742805
CKAP2	0.497481	0.498716	0.504292	0.500008	9.65316e-05	0.502762
CKAP2L	0.497481	0.498716	0.504292	0.500008	0.499899	0.000910192
CKAP4	0.00483255	0.0040872	0.0403499	0.0716107	0.00656116	0.0688724
CKAP5	0.127845	0.161953	0.360933	0.105309	0.0772386	0.0385563
CKB	0.0499485	0.0177178	0.0175524	0.00229227	0.00635941	0.0145668
CKM	0.000251181	0.498716	0.000596291	0.000410864	0.00103695	0.00714369
CKMT2	0.00705124	0.498716	0.000596291	0.000802157	3.50121e-05	0.502762
CKS1B	0.497481	0.00814986	0.504292	0.500008	0.000571231	0.502762
CLASP1	0.0391031	0.0382737	0.0235307	0.0456171	0.0702428	0.00494378
CLASP2	0.0162587	0.0121667	0.0290302	0.0779192	0.0309199	0.0677424
CLC	0.00417997	0.193536	0.0867884	0.0615721	0.0300098	0.0188579
CLCA2	0.0103131	0.147555	0.002996	0.00132238	0.0520428	0.12832
CLCA4	0.338995	0.326251	0.248462	0.188318	0.268493	0.381668
CLCC1	0.00256391	0.00530287	0.0612116	0.00852275	0.000397076	0.0126895
CLCN3	0.00474957	0.0327278	0.00284957	0.00108418	1.83878e-05	0.502762
CLCN5	0.497481	0.498716	0.504292	0.0009921	0.00462693	0.502762
CLCN7	0.497481	0.498716	0.0114037	0.00012978	0.0137888	0.0180929
CLDN1	0.0614767	0.00806988	0.00520562	0.0191383	0.00449239	0.00191304
CLDN12	0.497481	0.498716	0.504292	0.0466576	0.499899	0.502762
CLDN17	0.497481	0.498716	0.504292	0.500008	0.00230716	0.502762
CLDN7	0.00866028	0.000907916	0.00327378	0.00297168	0.0291118	0.0178301
CLDND1	0.000649743	0.00930887	0.000164443	0.0128242	0.000637466	0.000204785
CLEC11A	0.497481	0.498716	0.504292	0.500008	0.00358407	0.502762
CLEC16A	0.017427	0.498716	0.504292	0.00275455	0.499899	0.502762
CLEC1A	0.497481	0.498716	0.0167404	0.500008	0.499899	0.502762
CLEC2B	0.497481	0.498716	0.504292	0.0468923	0.0532183	0.114712
CLEC3B	0.0519754	0.000389736	0.044548	0.0573819	0.0553629	0.0828103
CLGN	0.497481	0.498716	0.504292	0.500008	0.00175425	0.502762
CLIC1	0.0109439	0.0321676	0.000738892	0.00647588	0.00475497	0.0084459
CLIC2	0.177136	0.40147	0.25571	0.232882	0.333474	0.445348
CLIC3	0.331207	0.422956	0.292942	0.249345	0.276786	0.369068
CLIC4	0.498641	0.0475734	0.14424	0.203308	0.332055	0.396332
CLIC6	0.196609	0.0647428	0.0622107	0.00734203	0.0437347	0.00978284
CLINT1	0.000650253	2.34217e-05	0.0265647	0.0158166	0.00104596	0.0202735
CLIP1	0.0334564	0.261238	0.00552437	0.0114835	0.0560221	0.136764
CLIP2	0.126879	0.012783	0.0698867	0.0330631	0.0199853	0.0846517
CLK3	0.104112	0.00303157	0.125075	0.0431185	0.191573	0.026922
CLMN	0.497481	0.0130144	0.504292	0.500008	0.499899	0.502762
CLN3	0.0572199	0.0569124	0.282221	0.0322037	0.391435	0.235104
CLN5	0.497481	0.0988448	0.504292	0.0105212	0.00230716	0.0157276
CLN6	0.0280059	7.98542e-07	0.0632946	0.00698209	0.499899	0.00808633
CLNS1A	0.132847	0.0635053	0.131013	0.0653208	0.0697124	0.00202605
CLP1	0.497481	0.498716	0.504292	0.0360379	0.000902977	0.502762
CLPB	0.0058545	0.0208559	0.0261492	0.0764251	0.000386472	0.0353038
CLPP	0.0470324	0.000193592	0.01946	0.0739547	0.131649	0.0861642
CLPTM1	0.00036492	1.20683e-06	0.0254089	0.0848367	0.107341	1.23851e-05
CLPTM1L	0.167817	0.358973	0.0451479	0.150088	0.0683711	0.224095
CLPX	0.0327664	0.0094636	0.33609	0.0321114	0.00816362	0.00863679
CLSTN1	0.157949	0.101565	0.00270225	0.0832664	0.211409	0.0148118
CLTA	0.526942	0.12124	0.325168	0.358045	0.163702	0.301135
CLTB	0.0102069	0.00954725	0.0194381	0.00640568	0.00601318	0.0197552
CLTC	0.0832421	0.00108648	0.084009	0.0390309	0.215126	0.0679626
CLU	0.0640317	0.0518935	0.0102636	0.0121339	0.0679154	0.00260375
CLUH	0.00993864	0.0654819	4.77508e-05	7.26763e-05	0.0369287	0.0869797
CLVS2	0.497481	0.498716	0.504292	0.500008	0.499899	0.502762
CLYBL	0.0781191	0.0242542	0.0570606	0.0117667	0.00286405	0.0466785
CMA1	0.0123207	0.0401814	0.0125454	0.0565556	0.0876348	0.0320372
CMAS	0.0425611	0.0859579	0.00393719	0.00942969	0.00116648	0.0160941
CMBL	0.0129496	0.0225928	0.418637	0.0725496	0.065602	0.0508386
CMC1	0.497481	0.498716	0.504292	0.500008	0.499899	0.502762
CMC4	0.0652445	0.498716	0.504292	0.500008	0.499899	0.0779542
CMIP	0.0612344	0.000812629	0.0799938	9.93901e-06	0.00358148	0.0259834
CMPK1	0.0204909	0.165087	0.0438125	0.0663914	0.00194801	0.0348824
CMPK2	0.186432	0.10358	0.0299654	0.0610179	0.0673279	0.3218
CMSS1	0.0267179	0.498716	0.000596291	0.0129822	0.000144647	0.00373715
CMTM6	0.0105565	0.0389582	0.504292	0.111649	0.00368718	0.0474022
CMYA5	0.497481	0.498716	0.504292	3.40509e-05	0.0491585	0.00804753
CNBP	0.497481	0.498716	0.504292	0.0479279	0.499899	0.502762
CNDP1	0.497481	0.498716	0.504292	0.500008	0.00358407	0.502762
CNDP2	0.0735647	0.0106131	0.422702	0.169539	0.358331	0.332524
CNEP1R1	0.00705124	0.498716	0.00051195	5.85944e-07	0.000986675	0.502762
CNIH4	0.0102326	0.276524	0.358706	0.0667452	0.0353912	0.0499056
CNKSR1	0.000713059	0.00287764	0.0227177	0.000361613	0.00151228	0.00251603
CNKSR3	0.0504341	0.0130144	0.504292	0.500008	0.499899	0.502762
CNN1	0.00469177	0.125001	0.0203957	0.00742909	0.0789452	0.0725897
CNN2	0.0839553	0.290982	0.264658	0.325483	0.307334	0.234722
CNN3	0.0607509	0.00940729	0.00991893	0.00111024	0.0227357	0.0180075
CNNM1	0.497481	0.498716	0.504292	0.0479279	0.499899	0.502762
CNNM2	0.0652445	1.91471e-05	0.000596291	0.00185655	0.499899	0.502762
CNNM3	0.152858	0.498716	0.00285575	0.110418	0.110301	0.000161269
CNNM4	0.0715625	0.498716	0.0753098	0.00303036	0.00357454	0.0251694
CNOT1	0.124196	0.0296725	0.246146	0.108955	0.0642044	0.0520518
CNOT10	0.0453416	0.0020406	0.0971845	0.0511023	0.0159489	0.0013462
CNOT11	0.0306435	0.0580742	0.0343771	0.146403	0.0525136	0.0808471
CNOT2	0.0464445	0.123357	0.00711147	0.0991586	0.0316047	0.101956
CNOT3	0.0154659	0.0309543	0.220787	0.0843315	0.141921	0.112934
CNOT4	0.0102326	0.00447897	0.284352	0.000644857	0.0534997	0.0316688
CNOT6L	0.0099902	0.000186344	0.100015	0.0690565	0.00191629	0.0165397
CNOT7	0.0898954	0.000125076	0.0258388	0.0123305	0.0266677	0.000172152
CNOT8	0.497481	0.498716	0.504292	0.000234378	0.00230716	0.502762
CNP	2.92048e-06	0.0324725	0.0500293	0.0142264	6.75639e-09	0.0916263
CNPY2	0.00572827	0.249138	0.00560907	0.00570875	0.0394613	0.110996
CNPY3	0.0485435	0.000173986	0.256297	0.149758	0.100228	0.346674
CNPY4	0.41074	0.318615	0.24284	0.215266	0.374051	0.420513
CNRIP1	0.000804019	0.0964929	0.10563	0.0701583	2.11207e-05	0.152042
CNST	0.497481	0.0027614	0.0344147	0.0213056	0.000145594	0.0107403
CNTD2	0.0504341	0.0027614	0.000596291	0.500008	0.000307022	0.000122201
CNTLN	0.0326715	0.00182056	0.0206634	8.3422e-05	0.000551422	0.0107403
CNTN1	0.0992011	0.0784289	0.141699	0.0508397	0.0285688	0.000680255
CNTN5	0.497481	0.000355841	0.504292	0.000234378	0.499899	0.502762
CNTN6	0.497481	0.498716	0.504292	0.500008	0.499899	0.00242895
CNTNAP1	0.497481	0.498716	0.504292	0.000234378	0.00338689	0.502762
CNTNAP4	0.497481	0.498716	0.0106385	0.500008	0.499899	0.502762
CNTRL	0.497481	0.498716	0.037932	3.51813e-05	0.065027	0.00050767
COA3	0.0822645	0.0328936	0.00433791	0.00554208	0.000561902	0.00819359
COA4	0.0690738	0.00182056	0.000596291	0.0011613	2.62439e-05	0.502762
COA6	0.11736	0.000422637	0.0986728	0.00182161	0.0102796	0.000702545
COASY	0.031555	0.172186	0.0448179	0.0423402	0.019129	0.0849741
COBL	0.0194411	0.498716	0.504292	1.08296e-05	0.499899	0.502762
COBLL1	0.00911201	0.0674873	0.00628344	0.019955	0.139015	0.0978967
COCH	0.497481	0.498716	0.504292	0.00725766	0.499899	0.502762
COG1	0.00187364	0.0916147	0.00345797	0.0627096	0.00319026	0.073919
COG2	0.135312	0.208524	0.353555	0.0515079	0.147214	0.119528
COG3	0.0153846	0.0362665	0.0760889	0.0141494	0.0321928	0.0198362
COG4	0.0709978	0.0169001	0.105611	0.035785	0.000431139	0.0714515
COG5	0.00681402	0.161912	0.0565252	0.0436413	0.00254913	1.49791e-05
COG6	0.000784991	0.0841726	0.0238876	0.02553	0.00259659	0.0237354
COG7	0.0088885	0.160843	0.00687444	0.0378059	0.00472959	0.00297983
COG8	0.0731177	0.0906775	0.00360885	0.00673348	0.00395399	0.0154563
COIL	0.105967	0.0172372	0.208779	0.0372581	0.033542	0.0330551
COL10A1	0.497481	0.498716	0.504292	0.0360379	0.499899	0.0732986
COL11A1	0.000179977	0.151116	0.0167404	0.000360996	0.00124978	0.0029963
COL12A1	0.465621	0.299767	0.101455	0.332582	0.290501	0.176191
COL14A1	0.0142938	0.0724663	0.0472059	0.0274692	0.0330386	0.165063
COL15A1	0.150572	0.0219161	0.0123294	0.0749173	0.00676275	0.139101
COL17A1	0.143655	0.0629232	0.0613967	0.141566	0.00295526	0.0111101
COL18A1	0.0815447	0.0132993	0.307341	0.181481	0.121549	0.114885
COL19A1	0.497481	0.00441857	0.100311	0.00036042	0.00113906	0.502762
COL1A1	5.93938e-06	0.000182334	0.0101328	0.00407968	0.00197253	0.00243085
COL1A2	0.00569341	0.00042056	0.00235236	0.00336158	0.000205298	0.00572435
COL21A1	0.000459308	0.0075475	0.0400337	0.0261151	0.00743592	0.00687393
COL27A1	0.0112392	0.00458837	0.0224435	0.00134751	0.00340981	0.0394811
COL28A1	0.00925497	0.0190123	0.0139731	0.000656937	0.00038248	0.052202
COL2A1	0.142407	0.0027614	0.014504	0.0181382	0.0141067	0.0510831
COL3A1	6.55282e-05	0.0910866	0.0204198	0.000431882	0.0391594	0.002786
COL4A1	0.00482596	0.123667	0.00214714	0.207313	0.0229562	0.0785617
COL4A2	0.0855302	0.216912	0.0368846	0.0956761	0.0832653	0.261638
COL4A3BP	0.000857627	0.0528784	0.00988404	0.0176858	0.00335964	0.00956463
COL4A4	0.497481	0.498716	0.504292	0.000234378	3.50121e-05	0.502762
COL4A6	0.00705124	0.498716	0.504292	0.500008	0.499899	0.502762
COL5A1	0.0102326	0.246802	0.343963	0.167961	0.243133	0.176682
COL5A2	0.00895399	0.00137204	0.0169904	0.0367546	0.00313115	6.50149e-05
COL5A3	0.497481	0.498716	0.504292	0.000234378	0.00129362	0.0563778
COL6A1	0.0290309	0.00148666	0.0143022	0.000129062	0.0137484	0.0386021
COL6A2	0.117929	0.00248814	0.0103035	0.00377742	0.0684346	0.00411559
COL6A3	0.134637	0.0288891	0.00852758	0.018735	0.0693103	0.0238933
COL6A5	0.00148643	0.0635893	0.0270513	0.0175585	0.00948938	0.112501
COL6A6	0.022177	0.0480174	0.0351829	0.0372495	0.000920432	0.00229408
COL7A1	0.0275829	0.0203552	0.00302221	0.0196669	5.41336e-05	0.0947239
COL8A1	0.264609	0.0717974	0.310393	0.196503	0.282639	0.136721
COL8A2	0.497481	0.498716	0.504292	0.00122558	0.00156618	9.46678e-05
COL9A2	0.497481	0.498716	0.504292	0.500008	0.00358407	0.502762
COLEC10	0.0652445	0.498716	0.100311	0.0109328	0.0694167	0.0232792
COLEC11	0.017427	0.498716	0.504292	0.500008	0.499899	0.502762
COLGALT1	0.270734	0.0477275	0.236367	0.160549	0.106079	0.146301
COMMD1	0.0346088	0.0027614	0.00256648	0.0143385	0.0138592	0.0262393
COMMD10	0.0107035	0.00155836	0.267129	0.00882732	0.0293329	0.0117018
COMMD2	0.0265836	0.00797786	0.000670665	0.0124852	1.80526e-05	0.00143859
COMMD3	0.180312	0.00725548	0.00217651	0.0490981	0.0123799	0.0474621
COMMD4	0.019935	0.00297859	0.000739006	0.00494266	0.00806461	0.000130131
COMMD5	0.0491899	0.128228	0.020523	0.067234	0.0456253	0.0527068
COMMD6	0.00108482	0.0027614	0.00261864	0.00581248	0.00305409	0.00467847
COMMD7	0.0208622	0.0027614	0.000346763	0.00203693	6.56079e-06	0.00506039
COMMD8	0.000627488	0.0316316	0.01469	0.0281429	0.00113956	0.0261836
COMMD9	0.012462	0.0294824	0.189434	0.0797043	0.0131655	0.00338209
COMP	0.0204527	0.000826262	3.32085e-06	0.00336699	0.499899	0.00467847
COMT	0.109855	0.00676271	0.00499643	0.000984252	0.000209707	0.0226493
COMTD1	0.00850775	0.0145362	0.0226027	0.0313289	0.0448212	0.0107638
COPA	0.20013	3.453e-06	0.166361	0.106546	0.133232	0.190547
COPB1	0.37579	0.124473	0.467039	0.276354	0.402482	0.274284
COPB2	0.17908	0.140803	0.306365	0.119943	0.232745	0.0644511
COPE	0.264639	0.00951254	0.387306	0.15428	0.191904	0.070066
COPG1	0.239357	0.00925296	0.213796	0.113099	0.151693	0.159574
COPG2	0.00708194	0.022277	0.0114633	0.0343326	0.00846341	0.0148822
COPRS	0.497481	0.498716	0.504292	0.500008	0.499899	0.502762
COPS2	0.0385302	0.00140125	0.00129234	0.0205527	0.0050439	0.00103214
COPS3	0.0492569	0.00912831	0.0314544	0.0678199	0.0143214	0.0182274
COPS4	0.123308	0.096808	0.0274024	0.116992	0.174574	0.00814469
COPS5	0.145398	0.00508012	0.264594	0.256144	0.067671	0.0559293
COPS6	0.0327876	0.00968348	0.000158607	0.00796656	0.0100994	0.014847
COPS7A	0.0155888	0.00384097	0.00552104	0.00436869	0.00528378	0.000255541
COPS7B	0.0327102	0.00028148	0.000330836	0.000150055	0.000939211	0.092272
COPS8	0.00248147	1.83469e-05	0.000135064	0.0182771	0.00103086	0.0180527
COPZ1	0.10593	0.00479929	0.190765	0.0851051	0.0680116	0.195269
COPZ2	0.00155608	0.498716	0.504292	5.85944e-07	0.499899	0.502762
COQ10B	0.00272976	0.0145754	0.136411	0.00156134	0.00717033	0.0409526
COQ3	0.0343165	0.0139619	0.0263078	0.0118607	0.000640838	0.00232037
COQ5	0.00421288	0.0330181	0.0224349	0.069964	0.0138257	0.00712034
COQ6	0.031545	0.010103	0.0457336	0.038757	0.00121156	0.0314579
COQ7	0.497481	0.000270561	0.0843773	0.500008	0.499899	0.502762
COQ9	0.0309806	0.0218761	0.104213	0.058076	0.0814596	0.0119236
CORO1A	0.075756	0.0346996	0.307604	0.155971	0.104081	0.332403
CORO1B	0.140179	0.0744996	0.0328448	0.0233542	0.0150544	0.0365556
CORO1C	0.0023177	0.121581	0.153243	0.0970443	0.030645	0.0891656
CORO2A	0.0218444	0.040063	0.00475805	0.0672788	0.112304	0.00460514
COTL1	0.275416	0.257441	0.124528	0.286852	0.2427	0.270779
COX1	0.497481	0.498716	0.504292	0.500008	0.499899	0.502762
COX15	0.497481	0.498716	0.504292	0.0044705	0.499899	0.502762
COX17	0.497481	0.498716	0.504292	0.000189846	0.499899	0.502762
COX19	0.497481	0.498716	0.000596291	0.500008	0.499899	0.502762
COX2	0.003611	0.0123025	0.000774739	0.00337588	0.00555306	0.000172095
COX20	0.0983895	0.0190123	0.0835646	0.00130451	0.000570067	0.000985315
COX3	0.000495608	0.00814986	0.504292	0.500008	0.00358407	0.502762
COX4I1	0.00149922	0.0269647	0.247242	0.0613352	0.0293362	0.146634
COX5A	0.00705579	0.0779885	0.00459929	0.0823668	0.252367	0.0353716
COX5B	0.0287576	2.96571e-05	0.0239116	0.00117423	0.0163204	0.00423529
COX6A1	0.0180323	0.498716	0.000755353	0.00288952	0.00705593	0.000122201
COX6B1	0.497481	0.00814986	0.0167404	0.000189846	0.00230716	0.0158116
COX6C	0.00107619	0.0210368	0.0115316	0.00340883	0.0772021	0.000573734
COX7A1	0.164861	0.0781514	0.0072532	0.0394853	0.000108728	0.156605
COX7A2	0.0528211	0.0550579	0.00175921	0.00595443	0.0332865	0.00972811
COX7A2L	0.000565065	1.94213e-05	0.124379	0.00452435	0.00920156	0.000249592
COX7C	6.55872e-05	0.0082041	0.00128333	0.00107257	0.0108609	0.502762
CP	0.0395484	0.313876	0.136474	0.0777647	0.178567	0.0458021
CPA1	0.497481	0.498716	3.32085e-06	1.70286e-05	0.00230716	0.00765875
CPA2	0.497481	0.498716	0.504292	0.500008	0.0129543	0.502762
CPA3	0.0504424	0.00703928	0.139526	0.0011471	0.0143131	0.0272346
CPA4	0.00962207	0.00822116	0.0167404	0.0132392	0.0118213	0.0268017
CPA6	0.497481	0.498716	0.504292	0.0417714	0.499899	0.502762
CPB2	0.0315612	0.108781	0.0168885	0.0662559	0.076715	0.00369978
CPD	0.0022657	0.00965315	0.115386	7.94317e-05	0.0158875	0.000291686
CPE	0.497481	0.498716	0.504292	0.500008	0.499899	0.000738507
CPEB1	0.241826	0.00167663	0.252755	0.121376	0.112133	0.106308
CPEB2	0.497481	0.498716	0.504292	0.000189846	0.499899	0.502762
CPEB4	0.497481	0.498716	0.00256648	0.0027796	0.00435815	0.502762
CPLX2	0.497481	0.498716	0.504292	0.0173346	0.499899	0.502762
CPM	0.497481	0.498716	0.504292	0.00347406	0.0491585	0.0902091
CPN1	0.00280488	0.0290261	0.00177274	0.000878021	0.000791236	0.00408288
CPN2	0.0141186	0.113258	0.0720679	0.0382566	0.00153293	0.0326003
CPNE1	0.209772	0.0463487	0.351409	0.171463	0.175979	0.167205
CPNE2	0.0190672	0.123881	0.0301547	0.0393617	0.246856	0.00272701
CPNE3	0.00974812	0.0676946	0.0214701	0.065868	0.000136319	0.156695
CPNE6	0.497481	0.498716	0.504292	0.500008	0.499899	0.0021428
CPNE8	0.497481	0.000355841	2.5644e-05	0.0037327	0.0693095	0.0161342
CPOX	0.142871	0.180818	0.159542	0.0991737	0.139284	0.0226636
CPPED1	0.00189547	0.000427997	0.136968	0.00206745	0.000872214	0.0110928
CPQ	0.151013	0.0305904	0.190598	0.198831	0.120584	0.141675
CPS1	0.00269293	0.0133286	0.0128498	7.29433e-08	0.000341729	0.0153996
CPSF1	0.0557515	0.130162	0.0130594	0.0373879	0.0565915	0.0730617
CPSF2	0.132338	0.000106379	0.00536455	0.0378192	0.0228952	0.00522601
CPSF3	0.0902311	0.0176932	0.313665	0.0150799	0.020469	0.000398235
CPSF3L	0.0120855	0.0018309	0.137639	0.035585	0.0588194	0.00252934
CPSF4	0.0504341	0.498716	0.504292	0.500008	0.499899	0.502762
CPSF6	0.267524	0.29935	0.0767289	0.216836	0.240211	0.121491
CPSF7	0.0527717	0.00224656	0.000868119	0.0114193	0.0777222	0.0774602
CPT1A	0.243764	0.469051	0.10019	0.195128	0.206341	0.0761188
CPT1B	0.497481	0.498716	0.504292	0.500008	0.00182523	0.502762
CPT1C	0.497481	0.498716	0.0059139	0.00183752	0.499899	0.502762
CPT2	0.123493	0.00925324	0.0170758	0.0973361	0.0618026	0.058648
CPVL	0.0223622	0.0123894	0.165591	0.0634071	0.00223397	0.201106
CPXM1	0.497481	0.498716	0.504292	0.0307416	0.0229009	0.502762
CPXM2	0.497481	0.498716	0.504292	0.500008	0.499899	0.00427787
[truncated: 7,742 more rows]
