# Supplementary material for: Integrative proteogenomic characterization of early esophageal cancer
Source: Research Square preprint supplement (doi:10.21203/rs.3.rs-227745/v2), 2021-10-12
Supplement: Supplementary file 11 [file d0fe18724d8c9a0f79434007.xlsx]

## Sheet: Description
Supplementary Table 6: Proteome clusters of ESCC progression, Related to Fig. 4 and Supplementary Fig. 5.
Sheet	Description
6a	Consensus cluster analysis of 756 samples in Fig. 4a.
6b	The differential expressed proteins in the two clusters.

## Sheet: 6a
Symbol	Cluster
1(001)	C1
1(002)	C1
1(003)	C1
1(004)	C1
1(005)	C1
1(006)	C1
1(007)	C1
1(008)	C1
1(009)	C1
1(010)	C1
1(011)	C1
1(012)	C1
1(013)	C1
1(014)	C1
1(015)	C1
1(016)	C1
1(017)	C1
1(018)	C1
1(019)	C1
1(020)	C1
1(021)	C1
1(022)	C1
1(023)	C1
1(024)	C1
1(025)	C1
1(026)	C1
1(027)	C1
1(028)	C1
1(029)	C1
1(030)	C1
1(031)	C1
1(032)	C1
1(033)	C1
1(034)	C1
1(035)	C1
1(036)	C1
1(037)	C1
1(038)	C1
1(039)	C1
1(040)	C1
1(041)	C1
1(042)	C1
1(043)	C1
1(044)	C1
1(045)	C1
1(046)	C1
1(047)	C1
1(048)	C1
1(049)	C1
1(050)	C1
1(051)	C1
1(052)	C1
1(053)	C1
1(054)	C1
1(055)	C1
1(056)	C1
1(057)	C1
1(058)	C1
1(059)	C1
1(060)	C1
1(061)	C1
1(062)	C1
1(063)	C1
1(064)	C1
1(065)	C1
1(066)	C1
1(067)	C1
1(068)	C1
1(069)	C1
1(070)	C1
1(071)	C1
1(072)	C1
1(073)	C1
1(074)	C1
1(075)	C1
1(076)	C1
1(077)	C1
1(078)	C1
1(079)	C1
1(080)	C1
1(081)	C1
1(082)	C1
1(083)	C1
1(084)	C1
1(085)	C1
1(086)	C1
1(087)	C1
1(088)	C1
1(089)	C1
1(090)	C1
1(091)	C1
1(092)	C1
1(093)	C1
1(094)	C1
1(095)	C1
1(096)	C1
1(097)	C1
1(098)	C1
1(099)	C1
1(100)	C1
1(101)	C1
1(102)	C1
1(103)	C1
1(104)	C1
1(105)	C1
1(106)	C1
1(107)	C1
1(108)	C1
1(109)	C1
1(110)	C1
1(111)	C1
1(112)	C1
1(113)	C1
1(114)	C1
2_1(001)	C1
2_1(002)	C1
2_1(003)	C1
2_1(004)	C1
2_1(005)	C1
2_1(006)	C1
2_1(007)	C1
2_1(008)	C1
2_1(009)	C1
2_1(010)	C1
2_1(011)	C1
2_1(012)	C1
2_1(013)	C1
2_1(014)	C1
2_1(015)	C1
2_1(016)	C1
2_1(017)	C1
2_1(018)	C1
2_1(019)	C1
2_1(020)	C1
2_1(021)	C1
2_1(022)	C1
2_1(023)	C1
2_1(024)	C1
2_1(025)	C1
2_1(026)	C1
2_1(027)	C1
2_1(028)	C1
2_1(029)	C1
2_1(030)	C1
2_1(031)	C1
2_1(032)	C1
2_1(033)	C2
2_1(034)	C2
2_1(035)	C1
2_1(036)	C1
2_1(037)	C1
2_1(038)	C1
2_1(039)	C1
2_1(040)	C1
2_1(041)	C1
2_1(042)	C1
2_1(043)	C1
2_1(044)	C1
2_1(045)	C1
2_1(046)	C1
2_1(047)	C1
2_1(048)	C1
2_1(049)	C1
2_1(050)	C1
2_1(051)	C1
2_1(052)	C1
2_1(053)	C1
2_1(054)	C1
2_1(055)	C1
2_1(056)	C1
2_1(057)	C1
2_1(058)	C1
2_1(059)	C1
2_1(060)	C1
2_1(061)	C1
2_1(062)	C1
2_1(063)	C1
2_1(064)	C1
2_1(065)	C1
2_1(066)	C1
2_1(067)	C1
2_1(068)	C1
2_1(069)	C2
2_1(070)	C1
2_1(071)	C1
2_1(072)	C1
2_1(073)	C2
2_1(074)	C1
2_1(075)	C1
2_1(076)	C1
2_1(077)	C1
2_1(078)	C2
2_1(079)	C1
2_1(080)	C1
2_1(081)	C1
2_1(082)	C1
2_1(083)	C1
2_1(084)	C1
2_1(085)	C1
2_1(086)	C1
2_1(087)	C1
2_1(088)	C1
2_1(089)	C1
2_1(090)	C1
2_1(091)	C1
2_1(092)	C1
2_1(093)	C1
2_1(094)	C1
2_1(095)	C1
2_1(096)	C1
2_1(097)	C1
2_1(098)	C1
2_1(099)	C1
2_1(100)	C1
2_1(101)	C1
2_1(102)	C1
2_1(103)	C1
2_1(104)	C1
2_1(105)	C2
2_1(106)	C1
2_1(107)	C1
2_1(108)	C1
2_1(109)	C1
2_1(110)	C1
2_1(111)	C1
2_1(112)	C2
2_1(113)	C1
2_1(114)	C1
2_2(003)	C2
2_2(004)	C1
2_2(005)	C2
2_2(007)	C2
2_2(010)	C2
2_2(012)	C1
2_2(013)	C1
2_2(014)	C1
2_2(015)	C2
2_2(017)	C1
2_2(018)	C2
2_2(019)	C1
2_2(020)	C1
2_2(021)	C2
2_2(022)	C1
2_2(023)	C1
2_2(024)	C1
2_2(025)	C2
2_2(026)	C2
2_2(027)	C2
2_2(028)	C1
2_2(029)	C2
2_2(030)	C2
2_2(032)	C1
2_2(033)	C2
2_2(035)	C2
2_2(036)	C1
2_2(037)	C2
2_2(038)	C2
2_2(039)	C2
2_2(040)	C1
2_2(041)	C2
2_2(042)	C1
2_2(044)	C2
2_2(045)	C2
2_2(046)	C1
2_2(047)	C1
2_2(048)	C2
2_2(049)	C1
2_2(051)	C2
2_2(052)	C2
2_2(053)	C2
2_2(054)	C1
2_2(055)	C2
2_2(056)	C2
2_2(057)	C2
2_2(058)	C1
2_2(059)	C2
2_2(061)	C1
2_2(062)	C2
2_2(063)	C1
2_2(064)	C1
2_2(065)	C1
2_2(066)	C1
2_2(067)	C1
2_2(068)	C2
2_2(069)	C2
2_2(071)	C1
2_2(072)	C2
2_2(074)	C1
2_2(075)	C2
2_2(077)	C1
2_2(078)	C2
2_2(080)	C1
2_2(081)	C1
2_2(082)	C1
2_2(083)	C1
2_2(084)	C1
2_2(085)	C1
2_2(086)	C1
2_2(087)	C1
2_2(088)	C2
2_2(089)	C1
2_2(091)	C2
2_2(092)	C1
2_2(093)	C1
2_2(095)	C1
2_2(096)	C1
2_2(098)	C1
2_2(099)	C1
2_2(100)	C1
2_2(101)	C1
2_2(102)	C2
2_2(103)	C1
2_2(104)	C1
2_2(105)	C2
2_2(106)	C2
2_2(107)	C1
2_2(108)	C1
2_2(110)	C2
2_2(112)	C2
2_2(113)	C2
3_1(001)	C2
3_1(004)	C2
3_1(005)	C2
3_1(006)	C2
3_1(007)	C1
3_1(008)	C2
3_1(012)	C2
3_1(015)	C2
3_1(016)	C1
3_1(017)	C2
3_1(018)	C2
3_1(019)	C2
3_1(020)	C2
3_1(021)	C2
3_1(022)	C2
3_1(023)	C2
3_1(025)	C2
3_1(026)	C2
3_1(027)	C2
3_1(028)	C1
3_1(029)	C2
3_1(030)	C2
3_1(032)	C2
3_1(033)	C2
3_1(034)	C2
3_1(035)	C2
3_1(037)	C2
3_1(038)	C2
3_1(039)	C2
3_1(041)	C2
3_1(044)	C2
3_1(046)	C1
3_1(047)	C2
3_1(048)	C2
3_1(049)	C2
3_1(051)	C2
3_1(053)	C2
3_1(056)	C1
3_1(059)	C2
3_1(067)	C2
3_1(068)	C1
3_1(075)	C2
3_1(076)	C2
3_1(078)	C2
3_1(082)	C2
3_1(083)	C2
3_1(085)	C2
3_1(086)	C2
3_1(088)	C2
3_1(093)	C2
3_1(095)	C2
3_1(097)	C2
3_1(098)	C2
3_1(099)	C2
3_1(100)	C2
3_1(102)	C2
3_1(104)	C1
3_1(105)	C1
3_1(107)	C2
3_1(109)	C2
3_1(112)	C2
3_2(003)	C2
3_2(004)	C2
3_2(008)	C2
3_2(010)	C2
3_2(011)	C2
3_2(012)	C1
3_2(015)	C2
3_2(018)	C2
3_2(020)	C2
3_2(021)	C2
3_2(024)	C2
3_2(026)	C2
3_2(028)	C2
3_2(029)	C2
3_2(032)	C2
3_2(034)	C2
3_2(036)	C2
3_2(037)	C2
3_2(038)	C2
3_2(039)	C2
3_2(040)	C1
3_2(041)	C2
3_2(047)	C2
3_2(048)	C2
3_2(049)	C2
3_2(050)	C2
3_2(051)	C2
3_2(052)	C2
3_2(056)	C2
3_2(057)	C2
3_2(059)	C2
3_2(060)	C2
3_2(062)	C2
3_2(063)	C1
3_2(064)	C2
3_2(065)	C2
3_2(067)	C2
3_2(068)	C2
3_2(069)	C2
3_2(070)	C2
3_2(071)	C1
3_2(073)	C2
3_2(074)	C2
3_2(075)	C1
3_2(076)	C2
3_2(078)	C2
3_2(080)	C2
3_2(081)	C2
3_2(082)	C2
3_2(085)	C2
3_2(086)	C2
3_2(087)	C2
3_2(089)	C1
3_2(092)	C1
3_2(093)	C2
3_2(094)	C1
3_2(095)	C2
3_2(096)	C2
3_2(097)	C2
3_2(098)	C2
3_2(099)	C2
3_2(100)	C2
3_2(101)	C2
3_2(102)	C2
3_2(103)	C2
3_2(104)	C2
3_2(105)	C2
3_2(107)	C2
3_2(109)	C2
3_2(110)	C2
3_2(112)	C2
3_2(113)	C2
3_2(114)	C1
3_3(001)	C2
3_3(004)	C2
3_3(006)	C2
3_3(007)	C2
3_3(008)	C2
3_3(012)	C2
3_3(013)	C2
3_3(015)	C2
3_3(017)	C1
3_3(018)	C2
3_3(019)	C2
3_3(020)	C2
3_3(022)	C2
3_3(025)	C2
3_3(026)	C2
3_3(027)	C2
3_3(028)	C2
3_3(032)	C1
3_3(034)	C2
3_3(035)	C2
3_3(038)	C2
3_3(039)	C2
3_3(040)	C2
3_3(041)	C2
3_3(045)	C2
3_3(047)	C2
3_3(048)	C2
3_3(049)	C2
3_3(050)	C1
3_3(051)	C2
3_3(054)	C2
3_3(057)	C2
3_3(059)	C2
3_3(060)	C2
3_3(061)	C2
3_3(062)	C2
3_3(067)	C2
3_3(069)	C2
3_3(070)	C2
3_3(071)	C2
3_3(072)	C2
3_3(077)	C2
3_3(078)	C2
3_3(080)	C2
3_3(083)	C1
3_3(085)	C2
3_3(086)	C2
3_3(088)	C2
3_3(090)	C2
3_3(091)	C2
3_3(092)	C1
3_3(093)	C2
3_3(095)	C1
3_3(096)	C2
3_3(098)	C2
3_3(099)	C2
3_3(100)	C2
3_3(101)	C2
3_3(102)	C2
3_3(103)	C1
3_3(105)	C2
3_3(106)	C1
3_3(107)	C2
3_3(109)	C2
3_3(110)	C2
3_3(112)	C2
3_3(113)	C2
3_4(007)	C2
3_4(012)	C2
3_4(013)	C1
3_4(017)	C1
3_4(018)	C1
3_4(020)	C2
3_4(023)	C2
3_4(024)	C2
3_4(029)	C2
3_4(030)	C2
3_4(053)	C1
3_4(069)	C2
3_4(075)	C2
3_4(078)	C2
3_4(081)	C2
3_4(088)	C2
3_4(105)	C2
3_4(107)	C2
3_4(110)	C2
3_5(001)	C2
3_5(002)	C2
3_5(003)	C2
3_5(004)	C2
3_5(006)	C2
3_5(007)	C2
3_5(009)	C2
3_5(012)	C2
3_5(013)	C2
3_5(015)	C1
3_5(017)	C1
3_5(018)	C2
3_5(020)	C1
3_5(024)	C2
3_5(032)	C2
3_5(034)	C2
3_5(040)	C1
3_5(042)	C2
3_5(051)	C2
3_5(053)	C2
3_5(055)	C2
3_5(060)	C2
3_5(063)	C1
3_5(064)	C2
3_5(066)	C2
3_5(067)	C2
3_5(069)	C2
3_5(070)	C2
3_5(075)	C2
3_5(079)	C2
3_5(081)	C2
3_5(087)	C2
3_5(088)	C2
3_5(091)	C2
3_5(093)	C2
3_5(098)	C2
3_5(104)	C2
3_5(105)	C2
3_5(106)	C2
4_1(002)	C2
4_1(003)	C2
4_1(004)	C2
4_1(005)	C2
4_1(006)	C1
4_1(009)	C1
4_1(010)	C2
4_1(011)	C2
4_1(013)	C2
4_1(015)	C2
4_1(016)	C2
4_1(018)	C2
4_1(024)	C2
4_1(025)	C2
4_1(026)	C2
4_1(027)	C2
4_1(028)	C2
4_1(031)	C2
4_1(032)	C2
4_1(037)	C2
4_1(040)	C2
4_1(042)	C2
4_1(050)	C1
4_1(055)	C2
4_1(061)	C1
4_1(062)	C2
4_1(063)	C1
4_1(065)	C2
4_1(066)	C1
4_1(067)	C2
4_1(068)	C2
4_1(069)	C2
4_1(071)	C2
4_1(073)	C2
4_1(074)	C2
4_1(076)	C2
4_1(077)	C2
4_1(080)	C2
4_1(081)	C2
4_1(082)	C2
4_1(083)	C1
4_1(084)	C2
4_1(086)	C2
4_1(087)	C2
4_1(088)	C2
4_1(091)	C2
4_1(093)	C2
4_1(094)	C2
4_1(095)	C2
4_1(098)	C2
4_1(099)	C2
4_1(100)	C2
4_1(101)	C2
4_1(102)	C2
4_1(104)	C2
4_1(106)	C2
4_1(107)	C2
4_1(109)	C2
4_1(110)	C2
4_1(112)	C2
4_1(113)	C2
4_2(006)	C2
4_2(010)	C2
4_2(013)	C2
4_2(018)	C2
4_2(019)	C2
4_2(020)	C2
4_2(022)	C2
4_2(024)	C2
4_2(029)	C2
4_2(038)	C2
4_2(039)	C2
4_2(041)	C2
4_2(061)	C1
4_2(070)	C1
4_2(092)	C1
4_2(103)	C2
4_2(107)	C2
4_2(111)	C1
4_3(013)	C2
4_3(017)	C2
4_3(030)	C2
4_3(041)	C2
4_3(054)	C1
4_3(070)	C2
4_3(112)	C2
5_1(005)	C2
5_1(006)	C2
5_1(027)	C1
5_1(031)	C2
5_1(061)	C1
5_1(069)	C2
5_1(076)	C2
5_1(077)	C1
5_1(097)	C2
5_1(105)	C2
5_1(106)	C2
5_1(107)	C2
5_1(110)	C2
5_1(112)	C2
5_2(010)	C2
5_2(013)	C2
5_2(031)	C2
5_2(043)	C2
5_2(061)	C2
5_2(062)	C2
5_2(084)	C2
5_2(099)	C2
5_2(114)	C2
5_3(013)	C2
5_3(020)	C2
5_3(024)	C2
5_3(042)	C2
5_3(070)	C1
5_3(090)	C2
5_3(099)	C2
5_3(111)	C2
5_3(112)	C2
6_1(006)	C2
6_1(020)	C2
6_1(028)	C2
6_1(033)	C2
6_1(106)	C2
6_2(006)	C2
6_2(013)	C2
6_2(020)	C2
6_2(106)	C2
6_2(114)	C2
6_3(010)	C2
6_3(013)	C1
6_3(041)	C2
6_3(043)	C2
6_3(070)	C2
6_3(099)	C2
6_3(109)	C2
7_1(006)	C2
7_1(013)	C2
7_1(015)	C2
7_1(020)	C2
7_1(042)	C2
7_1(058)	C2
7_1(063)	C2
7_1(069)	C2
7_1(099)	C2
7_1(104)	C1
7_1(106)	C2
7_1(107)	C2
7_2(013)	C1
7_2(015)	C2
7_2(020)	C2
7_2(023)	C2
7_2(043)	C2
7_2(099)	C2
7_2(100)	C2
7_2(105)	C2
7_2(108)	C2
7_3(013)	C2
7_3(020)	C2
7_3(041)	C2
7_3(043)	C2
7_3(070)	C2
7_3(099)	C2
7_3(101)	C2
7_3(103)	C2
7_3(105)	C2
7_3(106)	C2
7_3(109)	C2
8(115)	C2
8(118)	C2
8(121)	C2
9(116)	C2
9(117)	C2
9(119)	C2
9(120)	C2
9(122)	C2
9(123)	C2
9(124)	C2

## Sheet: 6b
Symbol	Geomean_Cluster 1	Geomean_Cluster 2	FC (Cluster 2/Cluster 1)	pvalue (t test)
ENDOU	0.822985	0.0036522	0.00443775	4.34214e-58
MUC21	0.300111	0.00161599	0.00538463	6.97012e-37
LYNX1	0.139671	0.000852809	0.00610584	3.08832e-12
BNIPL	0.075928	0.000473389	0.0062347	2.9964e-54
ALOX12	0.0142047	0.000110896	0.00780698	1.42092e-28
PADI1	0.0860738	0.000712936	0.00828284	2.72423e-34
TPRG1	0.0117898	0.000108788	0.00922736	3.25921e-06
GDPD3	0.0318341	0.000304884	0.00957726	2.06737e-30
VSIG10L	0.382058	0.00416354	0.0108976	8.31689e-66
SPINK5	1.48474	0.0175044	0.0117895	5.69159e-33
ALOX15B	0.0925144	0.00109854	0.0118743	4.47337e-18
LMO7	0.0468841	0.000561175	0.0119694	4.01921e-24
MGLL	0.10338	0.00127399	0.0123233	2.61494e-34
SCIN	0.138385	0.00173233	0.0125182	1.92756e-30
PLEKHA7	0.0514359	0.000721715	0.0140313	2.20208e-17
EPS8L1	0.455994	0.0071325	0.0156416	1.84105e-60
SH3BGRL2	0.00919208	0.000160449	0.0174551	1.35945e-19
TMPRSS11E	0.00721061	0.000126572	0.0175536	1.1547e-28
SCEL	3.30186	0.0585158	0.0177221	6.4962e-59
TTC22	0.00818631	0.000157683	0.0192618	3.27973e-29
GBP7	0.378612	0.00869962	0.0229776	2.29167e-29
C2orf54	1.28408	0.0314879	0.0245217	2.22215e-62
CCDC64B	0.699816	0.017367	0.0248165	1.77097e-63
TRIM16	0.0696666	0.00175754	0.0252278	8.84885e-25
KLK13	0.015964	0.00044554	0.0279091	3.44965e-17
C6orf132	0.0169227	0.000478689	0.0282869	2.67181e-05
SULT2B1	2.08616	0.0616321	0.0295433	1.44541e-60
IL36A	1.05645	0.0335178	0.0317267	7.5575e-27
ACOX3	0.084532	0.00273975	0.0324108	6.45872e-30
RHCG	1.73974	0.0568748	0.0326916	1.57182e-39
NEBL	0.054888	0.00183424	0.033418	8.66791e-21
RASAL1	0.00901256	0.000337664	0.037466	8.94039e-16
ARHGEF10L	0.0385731	0.00148431	0.0384804	1.15174e-25
ACPP	0.336886	0.0130712	0.0387999	1.05206e-16
MPP7	0.0266721	0.00104131	0.0390411	1.86112e-07
GRPEL2	0.00166952	6.75925e-05	0.0404862	7.56739e-18
AIM1L	0.106805	0.00433089	0.0405495	7.06577e-23
KLK10	0.345204	0.0143802	0.0416573	2.51482e-08
PTK6	0.00253307	0.000105808	0.0417707	1.41766e-27
C1orf116	0.121577	0.00515261	0.0423815	1.04121e-28
FAM115C	0.0119094	0.000516625	0.0433797	1.57148e-14
SERPINB2	1.46318	0.0649686	0.0444022	1.90171e-45
DSG1	0.672882	0.0326272	0.0484887	3.97809e-22
CRNN	215.91	10.6252	0.049211	2.8139e-70
CLIC3	2.94952	0.152244	0.0516163	2.08283e-61
CES2	1.96139	0.103219	0.0526253	1.11473e-46
KLK12	0.00302078	0.000165863	0.0549074	2.19679e-15
PCDH1	0.0023336	0.000129299	0.0554074	1.97148e-21
PRSS27	0.00119287	6.96904e-05	0.0584224	1.01849e-17
EPHA1	0.00219456	0.000129892	0.0591883	1.84035e-08
RRAD	0.00761469	0.000457003	0.0600159	7.67008e-13
SPRR3	419.72	25.3458	0.0603875	3.2678e-45
TGM3	43.8061	2.72505	0.0622072	1.36622e-45
SBSN	0.028899	0.00180633	0.0625049	6.57963e-10
SDR16C5	0.108089	0.00714138	0.0660696	0.000119764
YOD1	0.00111172	7.55578e-05	0.0679645	4.81942e-21
SDCBP2	0.699598	0.0487997	0.0697538	4.98129e-23
ANXA9	0.00112528	8.02392e-05	0.0713062	0.000221573
NCCRP1	1.30943	0.0945016	0.0721702	1.30926e-52
ABLIM3	0.00105104	7.81471e-05	0.0743522	2.75219e-16
ABLIM1	0.263778	0.0200351	0.0759545	3.52294e-29
A2ML1	16.5286	1.2576	0.0760863	3.76378e-81
SORT1	0.181492	0.0138549	0.0763393	7.12224e-40
IVL	13.5653	1.05178	0.0775343	1.13233e-29
PROM2	0.0452371	0.00357222	0.0789666	7.48668e-11
ANKRD22	0.0861801	0.00682169	0.0791562	1.06724e-14
LLGL2	0.003263	0.000262987	0.0805966	3.58148e-07
CWH43	0.000770355	6.23858e-05	0.0809832	9.22577e-19
CEACAM5	0.221794	0.0180352	0.0813152	1.0651e-15
FAM63A	0.000962753	7.85493e-05	0.0815882	3.94476e-18
SERPINB13	1.47719	0.122296	0.0827898	1.35031e-21
ASPG	0.000650041	5.59459e-05	0.0860651	4.22912e-22
GPT2	0.00440836	0.000381198	0.0864716	8.94224e-08
DDAH1	0.0168462	0.00161726	0.0960017	8.45409e-10
TMEM79	0.00137291	0.000134011	0.0976111	1.09723e-15
ZNF99	0.000823885	8.49806e-05	0.103146	1.36325e-12
CLCA4	7.27014	0.766606	0.105446	1.29078e-43
DEGS2	0.000628843	7.00883e-05	0.111456	3.21472e-18
QSOX1	0.392435	0.0437573	0.111502	5.998e-31
DUOX1	0.0948086	0.0106722	0.112565	1.28696e-31
ANXA8L2	0.021655	0.00244895	0.113089	1.16241e-14
NBEAL2	0.0447161	0.00512204	0.114546	2.00406e-09
CRABP2	47.2161	5.52475	0.11701	1.50229e-38
IL1RN	78.0844	9.38369	0.120174	7.18318e-43
BFSP1	0.000901832	0.000111832	0.124005	5.24532e-12
TMPRSS11B	0.000436411	5.53325e-05	0.12679	3.88462e-13
DAAM1	0.000907299	0.000116408	0.128302	5.03349e-05
PPP2R5A	0.817434	0.108176	0.132336	0.00447074
TOM1L2	0.308843	0.0416905	0.134989	6.77798e-43
TP53I3	0.00912177	0.00123262	0.13513	4.01456e-15
SLC27A4	0.0964712	0.013222	0.137057	1.14457e-19
DHRS1	0.187115	0.0259607	0.138742	1.64975e-12
RALA	0.208237	0.0288916	0.138744	5.59919e-10
EPHA2	0.0353176	0.00503132	0.142459	7.38332e-06
CSTB	239.726	34.794	0.145141	6.82381e-20
ECM1	6.77772	0.987226	0.145657	5.12763e-50
MYO5B	0.000736213	0.000107349	0.145812	0.0013738
PHYHD1	0.0016353	0.000240507	0.147073	1.14662e-07
MPZL2	0.300914	0.0446354	0.148333	1.34584e-10
ANKRD35	0.000404679	6.20559e-05	0.153346	6.28442e-18
AACS	0.0255512	0.00394216	0.154285	1.8949e-07
UPP1	0.000582377	9.10841e-05	0.156401	0.00190964
DMKN	0.00143914	0.000226701	0.157526	6.76247e-06
SERPINB4	6.09519	0.963544	0.158083	1.43687e-10
AP1M2	0.00873525	0.00138371	0.158406	0.000206468
RUFY3	0.00100376	0.000159832	0.159233	7.45752e-15
EVPL	15.8138	2.53288	0.160169	1.99478e-85
VPS37B	0.0294025	0.00479455	0.163066	8.23918e-17
GJB2	0.00135883	0.0002221	0.163449	3.12416e-07
DOPEY2	0.000615912	0.000101571	0.164912	0.00280751
TGM1	11.0255	1.82352	0.165391	3.61011e-43
CYP4F12	0.000482638	8.02602e-05	0.166295	7.38158e-15
C15orf48	0.0031537	0.000539001	0.170911	1.10115e-07
OCLN	0.000407303	7.19712e-05	0.176702	6.2237e-10
SERPINB3	22.3068	3.98317	0.178563	1.73506e-29
KLC3	0.00459326	0.000823249	0.17923	0.0729451
EPHX2	1.12535	0.203091	0.180468	3.56359e-07
CTNNBIP1	0.0472694	0.00856139	0.181119	5.74207e-09
PLD1	0.00485952	0.000882402	0.181582	2.05572e-10
FAM83A	0.0187388	0.00342872	0.182974	0.000466831
RAB11FIP1	0.027194	0.00509688	0.187427	1.17818e-11
PVRL4	0.0497094	0.00950038	0.191118	0.00250625
PERP	7.16722	1.38658	0.193461	2.25848e-19
HPGD	0.00071519	0.000140225	0.196067	4.46179e-09
PPL	27.779	5.44986	0.196186	1.01868e-77
GNA15	0.00404994	0.000796546	0.196681	6.13856e-08
HOOK1	0.0135251	0.00266288	0.196885	0.000623638
PPFIBP2	0.0021334	0.000425385	0.199393	0.570602
CRAT	0.00582959	0.00117243	0.201118	0.028589
LY6D	0.00512341	0.00105689	0.206286	0.000203985
AIF1L	0.000477322	9.8525e-05	0.206412	1.58006e-08
TMPRSS11A	0.00118747	0.000246018	0.207178	0.00099988
CSTA	316.966	67.1332	0.211799	1.08102e-41
SORBS2	0.0507638	0.0108098	0.212943	0.000188483
FAM3D	0.000282006	6.00978e-05	0.213109	3.75758e-06
UACA	0.0114198	0.00246229	0.215617	0.0141227
TRIP10	0.0766096	0.0166903	0.217861	0.0416406
BTBD11	0.000451434	9.99575e-05	0.221422	1.67204e-05
TMEM40	0.00034046	7.72062e-05	0.22677	0.000119488
ITPKC	0.00154289	0.000350463	0.227147	9.74457e-09
NDUFA4	0.014258	0.00326078	0.228698	0.819669
MAPK13	0.085395	0.019733	0.231079	0.000759473
COL6A5	0.0920953	0.0213205	0.231505	0.18175
IL18	0.202099	0.0469532	0.232327	1.57237e-05
GBP6	16.9718	3.9434	0.23235	2.3382e-53
ARHGAP27	0.000677393	0.000158272	0.233649	2.33061e-08
PLCD1	0.342112	0.080037	0.23395	1.44654e-17
NDRG2	0.109459	0.0257932	0.235643	3.83047e-06
UGT1A7	0.000817589	0.000192975	0.236029	0.178949
RND3	0.000526697	0.000124363	0.236118	1.63882e-06
INPP1	0.505497	0.120736	0.238846	0.106986
SLMAP	0.0992657	0.0239815	0.241589	0.870802
GRN	0.000558015	0.000137495	0.246399	1.30904e-06
CHMP4C	0.000923965	0.000228654	0.24747	0.196559
PLEKHN1	0.000216022	5.3976e-05	0.249863	3.56737e-09
GALNT12	0.000240476	6.05541e-05	0.251809	0.0319997
X5.Sep	0.000392429	9.90105e-05	0.252302	4.60676e-09
ANXA1	2147.34	542.108	0.252456	8.54817e-75
GLTP	0.0530881	0.013416	0.252713	4.84074e-05
PDLIM2	0.796826	0.207167	0.25999	5.22724e-18
BPIFB2	0.00123604	0.000322731	0.261102	0.0124523
CGN	0.000805023	0.000210982	0.262082	1.17166e-07
FLG2	0.00186365	0.000488627	0.262188	0.000157995
HMGCS1	0.920684	0.248153	0.269531	4.45756e-12
CES1	0.269045	0.0729711	0.271223	5.72617e-05
ACOX1	0.246979	0.0671255	0.271786	1.91303e-13
MUC5B	0.00139407	0.000382594	0.274444	0.000459409
UBL3	0.000197812	5.44202e-05	0.275111	1.20213e-10
EPS8L2	2.01922	0.559216	0.276947	6.27794e-15
PSCA	0.000276123	7.69094e-05	0.278533	2.15586e-07
ZNF185	2.24516	0.628796	0.280067	1.18502e-44
TACC2	0.0758461	0.0214482	0.282786	0.00743486
PLD2	0.000680934	0.00019321	0.283743	0.000839888
VASN	0.000275863	7.91461e-05	0.286904	0.0588399
PTGR1	1.09952	0.315811	0.287226	0.115436
ASL	0.00826945	0.00239897	0.290101	0.399546
FRMPD4	0.000229611	6.66319e-05	0.290195	3.1419e-16
PPP1R3G	0.000215049	6.29029e-05	0.292506	4.70706e-06
PALMD	0.00310259	0.000907719	0.292568	0.018766
SASH1	0.000191292	5.60048e-05	0.292771	2.78216e-05
MTMR10	0.000302975	8.9207e-05	0.294437	0.0152292
FAM160A1	0.000273713	8.07346e-05	0.294961	4.33218e-11
SERPINB1	125.771	37.2086	0.295845	2.07312e-66
TUFT1	0.00481547	0.00142655	0.296244	0.429848
TTC9	0.000670849	0.000198993	0.296629	4.53598e-06
GRHL1	0.000862431	0.000257465	0.298533	3.15334e-05
ULK3	0.000309741	9.27181e-05	0.299341	0.0149922
MAN2A2	0.000415477	0.000126815	0.305228	2.5932e-09
RANBP9	0.0413563	0.0126708	0.306382	0.309683
NLRX1	0.196711	0.0606225	0.308181	1.95214e-15
FAM83D	0.000342804	0.000107606	0.313899	2.66963e-05
CERS3	0.00859216	0.00271445	0.315922	0.000579741
DSC2	8.24088	2.60552	0.316171	6.20006e-47
KIF21A	0.000710443	0.000230686	0.324708	0.000553888
ALS2CL	0.000174623	5.7232e-05	0.327745	5.07771e-07
BPIFB1	0.000764454	0.000252509	0.330313	0.166255
S100A16	106.052	35.0553	0.330548	1.09394e-43
GPD1L	0.000918671	0.000304168	0.331096	5.51221e-05
FAM3B	0.000161737	5.37156e-05	0.332117	1.13114e-06
GOLPH3L	0.0016686	0.000559788	0.335484	0.00573032
COBLL1	0.00560215	0.00189599	0.338439	0.00109408
HSPB8	0.326933	0.110674	0.33852	0.953117
PIP	0.00207664	0.000718913	0.34619	0.000139997
FAM83G	0.00895428	0.00313583	0.350204	0.914862
MSMO1	0.000321093	0.000112529	0.350456	0.0309633
S100A14	126.801	44.4606	0.350634	2.62083e-43
MUC1	0.00059208	0.000208425	0.352022	0.128911
TJP3	0.000160331	5.694e-05	0.35514	3.09966e-08
BBOX1	0.000146072	5.19035e-05	0.355329	4.86272e-10
OLFML1	0.0012686	0.000451942	0.356254	0.0706393
COL6A6	0.00073309	0.000262656	0.358286	0.0098474
C9orf169	0.000169031	6.05944e-05	0.35848	0.000344226
DOCK9	0.000496455	0.000180379	0.363334	0.865333
MAST4	0.000390055	0.000142443	0.365187	0.020998
GAN	0.00743324	0.00275116	0.370117	0.121091
STAP2	0.0668852	0.0250142	0.373986	0.000462458
AMACR	0.000258381	9.67663e-05	0.37451	1.45688e-05
PPIC	0.533119	0.199967	0.375089	0.000636066
MVK	0.197636	0.0744803	0.376855	1.03607e-08
LSS	0.138089	0.052366	0.379218	2.52094e-05
MNS1	0.00015705	6.03203e-05	0.384083	1.82272e-05
ATP11B	0.000225447	8.68852e-05	0.38539	0.000457656
REEP6	0.00222205	0.000863129	0.388439	0.216952
TOM1L1	0.000427302	0.000166285	0.389151	0.523296
PHACTR4	0.00162975	0.000636207	0.39037	7.51975e-09
ERO1L	3.12813	1.22212	0.390686	1.17121e-36
LDB3	0.00245153	0.000959266	0.391292	0.163992
ADH7	8.95809	3.51097	0.391933	2.02807e-06
MAL2	6.91015	2.72334	0.394108	0.00458452
CST3	0.15315	0.06056	0.395428	0.780285
AGFG2	0.000173989	6.94304e-05	0.399051	1.13372e-05
AIM1	0.378387	0.151196	0.399582	5.76624e-36
SYTL1	0.26359	0.1059	0.40176	0.0372713
S100A2	0.379722	0.152569	0.401792	0.000950818
COL21A1	0.000508275	0.00020463	0.402598	5.68615e-05
GOLGA4	0.0008123	0.000329569	0.405724	0.0063934
MVD	0.199109	0.0811142	0.407387	3.77847e-08
AHNAK2	0.989796	0.406055	0.410241	4.61567e-21
EPN3	0.000169128	6.9477e-05	0.410795	1.71729e-08
HECTD1	0.0190459	0.00785559	0.412457	0.203453
STK39	0.0588524	0.0242889	0.412709	0.793533
GALE	0.348786	0.144053	0.413013	0.36902
CDCP1	0.000322004	0.000133012	0.413077	0.0184945
PARD3	0.00866086	0.00359483	0.415066	0.119538
PMM1	0.000130042	5.42377e-05	0.417077	1.41848e-09
SPTBN2	0.870021	0.370236	0.425549	2.13456e-45
RAB25	1.32893	0.565564	0.42558	1.34352e-07
PTGS1	0.0435544	0.0186408	0.427989	0.00126567
SMAP1	0.179167	0.0779394	0.435009	0.00181124
RNF146	0.000360058	0.000156814	0.435526	0.059781
SDR9C7	0.000134712	5.87016e-05	0.435757	2.07009e-07
TRIM29	2.79813	1.22689	0.43847	4.49867e-12
GMDS	0.00856999	0.00377372	0.440341	0.00638837
FAM162A	0.379894	0.167551	0.441046	0.888597
FAM129B	10.4366	4.65466	0.445995	1.34018e-54
S100A8	97.7817	43.8854	0.44881	7.92323e-07
FANK1	0.000235693	0.000106037	0.449894	0.017989
KANK1	0.000159354	7.18345e-05	0.450785	2.48905e-06
ANO10	0.00417222	0.00192065	0.460342	0.340323
UBAP1	0.000609334	0.00028077	0.460781	0.0221295
MLLT4	0.266854	0.123346	0.462223	8.14481e-07
TMPRSS11D	2.15522	0.996821	0.462515	0.508077
CYP4F22	0.000117033	5.45229e-05	0.465877	0.00294885
CD207	0.000123606	5.76197e-05	0.466155	4.88539e-06
ZFYVE21	0.0027364	0.00128595	0.469944	0.500546
GNAQ	0.239862	0.113191	0.471902	0.47146
ERMP1	0.261475	0.123528	0.472428	0.627346
FAM84B	0.00184939	0.000874499	0.472858	0.364348
MAPK3	0.301833	0.143258	0.474626	9.91762e-05
CEACAM6	0.0489852	0.0232667	0.474974	0.842941
WNK4	0.000117808	5.61146e-05	0.476322	0.00639612
PI3	0.000315821	0.000150887	0.477761	0.413099
STUB1	0.142108	0.0683467	0.480948	0.747637
GIPC1	2.34818	1.1341	0.482972	4.82734e-19
NUCB2	0.767496	0.373023	0.486026	4.97883e-15
FGD4	0.00083294	0.000408549	0.490491	0.0408787
FLG	0.00011624	5.70715e-05	0.490978	0.000492238
KLK6	0.000927816	0.000456575	0.492096	0.947523
PYGM	0.00169388	0.000835373	0.493172	0.206453
USP6NL	0.000108143	5.35735e-05	0.495394	1.45839e-07
LRRFIP2	0.134936	0.0669888	0.49645	0.0229126
MROH6	0.000103496	5.14488e-05	0.49711	6.34955e-09
ZNF462	0.000138115	6.87073e-05	0.497463	1.99592e-06
SHROOM3	0.000145425	7.24492e-05	0.498189	0.541013
ENDOD1	0.266593	0.133519	0.500837	0.0862324
BTBD18	0.000127992	6.41884e-05	0.501501	0.00655775
SPINT1	0.00015682	7.89269e-05	0.503295	0.000224841
PLXNA2	0.000963503	0.000488627	0.507136	0.561282
DCD	0.000995302	0.000508329	0.510729	0.197803
LRP10	0.000195752	0.000101152	0.516736	0.00162741
RPS6KB2	0.000146991	7.59926e-05	0.516987	0.22667
KIF1C	0.000145882	7.544e-05	0.517132	0.0581356
PPP1R13L	1.20225	0.624695	0.519605	3.02674e-11
EMC9	0.000323163	0.000167948	0.519698	0.146797
CYP51A1	0.00557803	0.00293241	0.525707	0.00701729
ARHGAP32	0.000104333	5.48873e-05	0.52608	3.65477e-09
TJP2	0.125517	0.0662627	0.527918	0.114563
SLC5A1	0.000156037	8.32955e-05	0.533819	0.903912
EPN2	0.00208198	0.00111158	0.533903	0.0508698
PLEKHA5	0.00200663	0.00107179	0.534125	0.513076
CRYAB	26.1875	14.0651	0.537094	7.54763e-05
MVB12A	0.0168684	0.00913963	0.541818	0.238204
TMBIM1	0.123732	0.067473	0.545314	5.80773e-05
TXN	443.079	241.694	0.545487	4.21304e-11
C10orf118	0.000131398	7.17576e-05	0.54611	0.00789796
DSP	50.9399	27.91	0.547901	7.49618e-35
PKP3	12.3594	6.79697	0.549941	2.51088e-17
TST	1.50315	0.827669	0.550623	0.120358
SRPX	0.000172771	9.53946e-05	0.552145	0.144492
GSDMC	0.000572748	0.00031726	0.553927	0.66532
PLEKHM1	9.48017e-05	5.26498e-05	0.555367	3.86085e-08
LMOD1	0.295985	0.165239	0.558268	0.00433681
SYNM	1.59199	0.889636	0.558821	0.0101637
ACTA1	0.00147645	0.000832664	0.563965	0.629039
DENND2D	0.000238594	0.000134709	0.564594	0.0149742
JUP	88.0647	49.7536	0.564966	2.3946e-27
ZDHHC5	0.00184924	0.00105244	0.56912	0.935615
ITSN2	0.000599923	0.000342566	0.571016	0.496753
LIMCH1	0.000386034	0.000221605	0.574055	0.126904
UNC13B	0.000101672	5.85006e-05	0.575385	1.487e-05
STIM1	0.11183	0.0644571	0.576382	0.0987555
SOWAHC	0.0185865	0.0107437	0.57804	0.623633
S100A10	130.432	75.4648	0.578577	3.43553e-22
ULBP2	0.000574831	0.000333171	0.579598	0.000256648
C20orf26	9.35539e-05	5.42628e-05	0.580016	0.001041
DDI1	0.000121468	7.13772e-05	0.587622	2.95188e-05
RAB38	0.00139593	0.00082194	0.588814	0.893173
ACAA1	0.332062	0.195636	0.589154	0.0180187
SHMT1	0.877144	0.518493	0.591115	5.3539e-07
DCAF11	0.000552523	0.000327459	0.592661	0.000859981
RALB	0.116339	0.0692115	0.594912	0.314614
JMJD7	0.000420646	0.000254411	0.604811	0.01085
APOC3	1.78274	1.08048	0.606078	0.0109749
ARPC1A	0.54006	0.327706	0.606795	4.98524e-05
ARHGEF37	0.000148443	9.03155e-05	0.608421	0.454237
CYP2R1	0.000141678	8.62865e-05	0.609035	0.00521675
ARHGAP29	0.000306626	0.000186864	0.60942	0.0209445
NADSYN1	0.00503365	0.00306971	0.609838	0.00151667
ST14	0.0161596	0.00993988	0.615108	0.240421
POF1B	0.721487	0.444102	0.615536	0.192362
DSG3	51.3066	31.7637	0.619097	1.35052e-15
RAB3A	0.000126611	7.8436e-05	0.619502	0.0014118
AHNAK	31.3395	19.4655	0.621117	5.48491e-34
NAGK	5.62143	3.49774	0.622216	3.85642e-22
B4GALT1	0.00974904	0.00607011	0.622637	0.349364
DMD	0.00512809	0.00319651	0.623334	0.812243
SLK	0.230739	0.144232	0.625087	0.000818226
INADL	9.58022e-05	6.00786e-05	0.627111	0.000540894
MGST2	0.684532	0.43141	0.630226	0.00361108
AK1	0.817135	0.515045	0.630306	0.8916
MTPN	13.3509	8.42416	0.63098	0.157474
SERPIND1	0.218232	0.137805	0.631461	0.0819367
FAM83H	2.43397	1.54038	0.632868	2.15659e-11
NDRG4	0.000167547	0.00010605	0.632957	0.934922
PRSS22	8.84586e-05	5.64251e-05	0.63787	0.000127267
APOF	0.000123131	7.86649e-05	0.638873	0.283248
PMVK	2.80854	1.79957	0.640748	5.82643e-10
MLF2	0.000583029	0.000375362	0.643813	0.0149948
PLIN4	0.000129198	8.33206e-05	0.644905	0.110719
SPTLC2	0.00272363	0.00175818	0.645529	0.619573
GP1BB	0.00019917	0.000128982	0.647595	0.0695479
SLC9A3R1	4.75476	3.08776	0.649403	0.429383
CAPN7	0.000289795	0.000189603	0.654266	0.111629
GGCT	0.310234	0.203739	0.656727	0.875925
PSPH	0.00264409	0.00173873	0.65759	0.0855335
ST5	0.000292849	0.000192839	0.658492	0.0110461
PPP1R12B	0.00617047	0.00406755	0.659196	0.161478
ETFDH	0.00149804	0.000989682	0.660651	0.0615921
CANT1	0.000152137	0.000100663	0.661662	0.363958
ALDH3A1	49.3493	32.7745	0.664133	0.180828
CALML3	134.992	90.3975	0.66965	1.27898e-09
CPA4	7.81007e-05	5.242e-05	0.671185	0.00450372
SLC22A18	0.000524278	0.000352249	0.671873	0.870465
PPP2R2A	0.016142	0.0109126	0.676034	0.334891
TOM1	1.58631	1.07673	0.678763	3.44919e-09
FGFBP1	0.000534325	0.000362942	0.679253	0.206922
SH3GLB2	0.944073	0.642437	0.680495	3.1897e-05
NDST1	7.73172e-05	5.26548e-05	0.681024	0.298352
VPS36	0.000840749	0.000572571	0.681025	0.552021
LYPD3	9.22901e-05	6.29791e-05	0.682404	0.569275
CROT	0.00558852	0.00383833	0.686824	0.0326584
RAB27B	1.50565	1.0344	0.687012	0.762452
DSCAM	0.000135091	9.28479e-05	0.687301	0.710645
TUBB2A	0.0122181	0.00839863	0.687391	6.91238e-06
CAPNS2	1.95619	1.34865	0.689425	0.123116
S100A9	2457.96	1696.74	0.690303	6.00501e-09
CILP	0.000525421	0.000363957	0.692696	0.332251
TWF1	1.43027	0.991389	0.69315	0.00021795
GYPA	0.000157533	0.000109815	0.697094	0.500358
SPTLC1	0.749833	0.522821	0.69725	0.304411
NPEPPS	4.05071	2.82453	0.697293	1.36246e-21
SFN	86.4606	60.3612	0.698135	9.98338e-09
HBQ1	0.00027642	0.000193314	0.699349	0.277388
SAMD9	0.273102	0.191289	0.700431	0.0121383
LPIN1	7.64153e-05	5.36525e-05	0.702118	0.0108074
ZDHHC13	0.000102005	7.16864e-05	0.702775	0.0437899
MYO18A	0.183273	0.12926	0.705288	7.18453e-06
DLG1	0.0430215	0.0303754	0.706051	0.0351753
LGALS3	16.8396	11.9547	0.709915	1.21564e-09
PGD	32.1176	22.8076	0.710129	0.00193917
DUOXA1	0.000113553	8.07823e-05	0.711406	0.0569732
SERPINB5	18.5293	13.2026	0.712526	1.26055e-08
SCP2	0.00348008	0.00248133	0.713011	0.747308
CNN1	5.90404	4.21595	0.71408	0.830555
WDR13	0.0214006	0.0153307	0.716367	0.193201
TJP1	0.499296	0.360259	0.721535	0.00310403
RNF181	0.000271245	0.00019578	0.721783	0.185513
KIAA0226	0.000334849	0.000242657	0.724676	0.810143
ALDH9A1	2.17802	1.58088	0.725837	6.14031e-06
CD1A	8.31131e-05	6.05486e-05	0.728508	0.693744
AKTIP	0.000275659	0.000201475	0.730886	0.115661
SERPINB8	0.0642911	0.0470056	0.731136	2.73158e-13
PVRL1	0.000923337	0.00067918	0.735571	0.607873
ARPC5L	2.71395	1.99651	0.735649	2.8506e-06
VAT1	2.26132	1.66513	0.736354	1.4553e-05
RETSAT	0.00886267	0.00652911	0.736698	0.555995
TOLLIP	2.90703	2.14869	0.739136	0.000153006
RNH1	9.95552	7.36232	0.739522	1.75856e-05
PLXDC2	0.000328225	0.000242911	0.740074	0.0207972
ITPR2	0.000168834	0.00012514	0.741203	0.24192
PGM5	1.23041	0.913611	0.742526	0.394051
GPLD1	0.000130288	9.68892e-05	0.743655	0.397205
CDH1	5.70177	4.25538	0.746326	5.87315e-06
ME1	0.849101	0.635502	0.748442	0.0215137
AOC3	1.2038	0.902102	0.74938	0.521178
FABP5	757.358	568.465	0.750589	0.308137
TACSTD2	26.4249	19.8556	0.751396	3.30367e-05
SERPINB12	0.000211531	0.000158988	0.751604	0.759693
TIMM8B	0.0854933	0.0644375	0.753714	1.2623e-05
PKP1	7.08893	5.35648	0.755612	0.00119776
TMOD3	3.60982	2.73097	0.756539	0.131876
ADD2	0.000171979	0.000130347	0.757922	0.615244
CFD	0.000285341	0.00021663	0.759195	0.118184
BCL10	0.1302	0.0990204	0.760524	3.47739e-05
SH3RF1	8.26569e-05	6.2951e-05	0.761594	0.312126
ABCD3	0.133499	0.101951	0.763684	0.0223459
PDCD6IP	3.32966	2.5479	0.765214	2.53666e-13
PAX9	0.000103536	7.93688e-05	0.766581	0.564463
HSPB6	0.0883341	0.0677759	0.767268	0.00406543
EXPH5	7.48634e-05	5.74735e-05	0.767712	0.0506724
PDLIM7	0.42777	0.328679	0.768353	0.226346
ERBB2	0.000309556	0.000238024	0.76892	0.914361
RIT1	8.03127e-05	6.17897e-05	0.769363	0.00278049
MOSPD2	0.000116874	9.00476e-05	0.770466	0.39025
HBM	8.99595e-05	6.95655e-05	0.773297	0.150049
DMXL1	9.30374e-05	7.19551e-05	0.7734	0.287983
SPTB	0.481909	0.373346	0.774725	0.0617434
RNF123	0.000241935	0.000187564	0.775266	0.0220705
EPB42	0.0223199	0.0173192	0.775956	0.000356716
STRN	0.292843	0.227421	0.776598	0.111908
MYH14	3.90849	3.03733	0.777112	8.43134e-08
NQO1	0.00485869	0.00377921	0.777826	0.000735874
RAB3D	0.687553	0.535871	0.779388	0.00594186
SPTA1	0.145996	0.113947	0.780477	0.006438
SDC1	9.56959	7.46988	0.780585	0.0615417
OAS1	0.000353635	0.000276144	0.780873	0.206179
C10orf76	0.000172798	0.000134963	0.781043	0.622528
DNAJB1	11.9227	9.32427	0.782058	1.88389e-06
GALNT7	9.48388e-05	7.44313e-05	0.784819	0.0557087
ACSL1	0.186186	0.146194	0.785206	0.0156653
AHSP	0.000213016	0.000167319	0.785474	0.624749
GPRC5A	0.000916813	0.0007203	0.785656	0.376841
PLCB3	0.114183	0.0897596	0.786103	0.461043
ALDH3A2	3.70855	2.91868	0.787015	0.578868
NLRP2	0.000238569	0.000188193	0.788841	0.97844
STX17	0.00138024	0.00108949	0.789351	0.0157625
EPHB3	0.000153734	0.000121526	0.790493	0.538248
DPYD	0.0982819	0.0777318	0.790907	0.754465
MAEA	0.000487682	0.000387235	0.794032	0.527296
RP2	0.0159227	0.0126475	0.794306	0.155978
FAM114A1	0.0222832	0.0177538	0.796733	0.103956
ANXA2	366.345	291.982	0.797012	6.06446e-13
TMEM120A	0.00016272	0.000129743	0.797335	0.929692
SAA2	8.77782e-05	7.00988e-05	0.79859	0.0978616
ITCH	0.000511342	0.00041036	0.802516	0.247609
CTNNB1	5.45828	4.38462	0.803297	0.000235546
CAST	8.53006	6.85723	0.803889	4.4037e-06
PTCHD3	0.000115256	9.26882e-05	0.804192	0.00657911
ANK1	0.315428	0.253976	0.805178	0.0400353
RABGAP1	0.000931012	0.000750334	0.805934	0.330176
TAX1BP3	4.88195	3.93803	0.80665	0.212655
COX7A2	6.22037	5.03464	0.809379	0.0368431
TPD52L1	0.763084	0.617667	0.809436	0.0190023
BAIAP2	0.760071	0.615896	0.810314	0.00671724
FCHO2	0.00327336	0.00265305	0.810497	0.019834
CNN3	1.32733	1.0762	0.810804	0.949473
PPBP	0.00334921	0.00271707	0.811255	0.464299
HSD17B4	4.35688	3.5364	0.811681	6.63946e-07
DAPL1	0.00171601	0.00139843	0.814932	0.459925
LGALSL	0.00140683	0.00114672	0.815105	0.2699
LRG1	0.0523588	0.0427987	0.817411	0.625846
MICALL1	0.00194173	0.00158836	0.818012	0.00586427
BDH2	0.0438399	0.0359264	0.819491	2.36908e-05
MYH11	48.9131	40.1266	0.820365	0.0456486
ARF6	7.48792	6.15011	0.821338	0.0107062
MROH1	0.000186653	0.000153475	0.822247	0.818208
PITHD1	0.20674	0.170431	0.824371	0.773631
BIN3	0.000105129	8.67919e-05	0.825575	0.498318
HEBP2	0.312655	0.258399	0.826465	0.947128
HAS1	8.81845e-05	7.31681e-05	0.829716	0.196102
CA3	6.74493e-05	5.60289e-05	0.830682	0.0677417
PYGL	0.793613	0.661446	0.833462	0.6723
RBM47	0.000152503	0.000127131	0.83363	0.601332
SLC44A2	0.00136255	0.00113745	0.834791	0.726483
MINK1	0.00184367	0.00153946	0.834999	0.585419
CDC42BPG	0.00591662	0.00494252	0.835362	0.0302109
NHSL1	9.14185e-05	7.6377e-05	0.835465	0.324697
STARD10	0.00755386	0.00631583	0.836107	0.034567
CMPK1	6.51425	5.4507	0.836734	0.0130302
FLT4	0.000228331	0.000192648	0.843722	0.185423
MAP4K5	0.000113138	9.54706e-05	0.84384	0.383737
CACNA1H	6.02677e-05	5.08681e-05	0.844036	0.0114304
LOC100996574	0.000143525	0.000121168	0.844227	0.0094304
MST1	0.000115166	9.73292e-05	0.84512	0.636828
ACSL3	0.214995	0.181774	0.845482	0.828727
SNTB1	0.000956367	0.000808896	0.845801	0.921241
ANXA3	4.20897	3.56015	0.845849	0.263881
SMTN	0.0517735	0.0439131	0.848178	0.472482
ARHGAP5	0.000237403	0.000201588	0.849138	0.461981
DIP2B	0.0364419	0.0309608	0.849593	0.0257313
AP1S1	0.247416	0.210627	0.851309	0.0571131
LAD1	2.87368	2.44656	0.851368	0.0196631
ACTN3	6.14913e-05	5.24242e-05	0.852547	0.0146881
DES	118.32	100.911	0.852871	0.0737356
RAB10	5.47405	4.66891	0.852916	6.11217e-05
TMOD2	7.41374e-05	6.33902e-05	0.855037	0.345424
RPL27	5.6985	4.87472	0.855439	0.0631342
CHURC1	0.000188196	0.000161042	0.855715	0.260316
F12	0.000160945	0.000137739	0.855817	0.454676
TBC1D10A	0.000702676	0.000602138	0.856922	0.295298
ABHD5	6.2796e-05	5.38522e-05	0.857575	0.0190873
VPS26A	2.25271	1.93321	0.858172	0.297929
PLCH2	0.000136152	0.000116876	0.858427	0.108254
KIAA1468	0.0792844	0.0681022	0.858961	0.00300441
TSG101	0.102555	0.0882417	0.860434	0.691375
ALDH7A1	3.59764	3.09962	0.861571	0.00252793
CPN1	0.000113881	9.81454e-05	0.861827	0.333311
ITGA9	0.000115098	9.93913e-05	0.863538	0.405907
STXBP5	7.41741e-05	6.42803e-05	0.866614	0.491094
SCD	0.00030472	0.00026419	0.866993	0.140327
NCK2	0.00123932	0.00107694	0.868978	0.0766546
CLTB	0.000492251	0.000428515	0.870522	0.143104
C15orf52	6.26136e-05	5.45687e-05	0.871515	0.483215
NSDHL	0.133921	0.116759	0.871851	0.832562
CD55	0.000116197	0.000101379	0.872473	0.398787
VPS4B	1.3164	1.14987	0.8735	2.90014e-06
APOC1	0.0043519	0.00380478	0.87428	0.949556
HBZ	0.000122692	0.00010734	0.87487	0.426173
LDLR	7.60301e-05	6.66165e-05	0.876186	0.0624121
CKB	20.5272	17.9989	0.876836	0.292753
TSPO	0.000925001	0.000811711	0.877525	0.579074
CD9	0.483521	0.425094	0.879163	0.514602
PROC	8.20719e-05	7.21867e-05	0.879554	0.357134
CMAS	0.344442	0.30297	0.879599	0.055664
DHRS11	9.40989e-05	8.27919e-05	0.879839	0.320162
ZCCHC6	0.000166085	0.000146517	0.882184	0.393378
SH3GL1	0.818329	0.722124	0.882437	0.098585
MPP5	0.000133649	0.000118171	0.884193	0.649253
CAPN1	19.426	17.2251	0.886703	0.00025398
FCGBP	8.36021e-05	7.4168e-05	0.887155	0.122503
TRIOBP	0.00202448	0.00179786	0.888058	0.68304
PLEKHF2	8.3013e-05	7.3734e-05	0.888222	0.695614
EML2	1.10851	0.985455	0.888989	0.117243
CPA3	1.23406	1.10121	0.892347	0.902569
KLHL20	0.000105271	9.39996e-05	0.892928	0.383302
TANC2	9.76805e-05	8.72279e-05	0.892992	0.616546
SORBS1	0.936103	0.836209	0.893287	0.195586
PRKCD	0.231921	0.207323	0.893936	0.00246727
PDE12	0.0443887	0.0398159	0.896984	0.0170698
DMBT1	0.000145234	0.000130527	0.898732	0.308081
PDLIM5	0.434411	0.391025	0.900127	0.610659
OGN	5.34636	4.8197	0.901491	0.551141
MAPKAPK3	7.24623e-05	6.53289e-05	0.901556	0.13405
TPRG1L	7.42357e-05	6.6952e-05	0.901885	0.229786
OXR1	0.000271365	0.000244969	0.902729	0.408398
HERC6	0.000241187	0.000217769	0.902904	0.424521
SNX24	5.79365e-05	5.24412e-05	0.90515	0.161679
GSTT1	0.00457099	0.00413774	0.905217	0.0467446
PFKP	1.68728	1.5279	0.90554	0.793691
PICK1	8.3951e-05	7.61397e-05	0.906954	0.856521
WBP2	0.00516724	0.00469464	0.908539	0.00228355
ACSS2	0.00073212	0.000665414	0.908887	0.109335
PIK3C2B	7.01907e-05	6.38109e-05	0.909108	0.448997
OSBPL2	0.000174542	0.000158833	0.910002	0.118606
KIF1B	0.00010073	9.17419e-05	0.910769	0.310286
PACSIN3	0.497949	0.453941	0.911621	0.156282
LRRC20	5.57672e-05	5.08968e-05	0.912666	0.139854
SNX33	0.000120638	0.000110141	0.912988	0.569611
C1QC	0.102032	0.0931696	0.913137	0.967927
PIGN	6.08558e-05	5.55961e-05	0.913572	0.937528
PPP4R1	0.0669602	0.0611836	0.913731	0.00365788
HPSE2	6.14236e-05	5.61719e-05	0.9145	0.517658
PHGDH	1.99992	1.82901	0.914543	0.98779
COX7C	7.2228e-05	6.61452e-05	0.915784	0.10199
CTTNBP2NL	7.79879e-05	7.15184e-05	0.917044	0.208953
SLC9A8	6.1747e-05	5.67485e-05	0.919049	0.489792
C6orf47	0.000111338	0.000102399	0.919718	0.797779
LRBA	0.159305	0.146922	0.922268	0.11527
CAPN5	6.95862e-05	6.4186e-05	0.922396	0.11926
VPS25	0.209644	0.193452	0.922764	0.0055181
EXOC6B	0.0428952	0.0396142	0.923511	0.00195836
AGT	1.89834	1.75352	0.923716	0.362717
COASY	1.08684	1.00597	0.925598	1.43388e-07
DHX32	8.36583e-05	7.74836e-05	0.926191	0.957843
MYL9	5.23326	4.84744	0.926276	0.0568324
COQ10B	7.0003e-05	6.4859e-05	0.926518	0.692097
TRAPPC5	8.56947e-05	7.94814e-05	0.927495	0.291498
ABI1	0.103406	0.0959199	0.927608	0.765665
C1QA	9.40458e-05	8.72907e-05	0.928172	0.455807
CAAP1	6.05439e-05	5.64377e-05	0.932177	0.26959
BBS7	6.84996e-05	6.38713e-05	0.932433	0.695309
CLIP1	0.209251	0.195238	0.933032	0.499653
S100A11	21.3639	19.9454	0.933604	0.948481
KIAA0247	6.37268e-05	5.95245e-05	0.934057	0.950021
SERPINA10	8.06781e-05	7.55562e-05	0.936514	0.51254
DPM3	6.8056e-05	6.3792e-05	0.937345	0.0156791
PRUNE2	5.59553e-05	5.24613e-05	0.937557	0.104474
MYO1E	0.111347	0.104516	0.938652	0.723907
CAMSAP3	0.000279	0.000262023	0.93915	0.0149014
NF1	5.41705e-05	5.09034e-05	0.939688	0.131616
DMTN	0.00014685	0.000138	0.939737	0.528845
SAA1	0.00020281	0.000190716	0.94037	0.11741
EVI5L	5.78167e-05	5.44117e-05	0.941106	0.445885
TRANK1	7.04139e-05	6.6344e-05	0.942201	0.137792
ALOX12B	6.05916e-05	5.71541e-05	0.943268	0.233805
FGFR1OP2	5.78534e-05	5.46656e-05	0.944899	0.496916
MOCS2	0.000218997	0.000206978	0.945119	0.335811
ATG9A	0.000152595	0.000144456	0.946662	0.824182
GGA1	0.000136617	0.000129375	0.946987	0.284801
SLC7A1	8.94333e-05	8.47396e-05	0.947518	0.525402
EHD3	0.286644	0.271803	0.948227	8.35634e-05
BLVRA	5.11281	4.84844	0.948292	0.249949
ELN	1.33688	1.26886	0.949115	0.145209
TNRC6C	8.20951e-05	7.79227e-05	0.949177	0.72976
SH2D4A	7.22516e-05	6.87376e-05	0.951364	0.871956
SYPL1	0.00674606	0.00641862	0.951462	0.00434403
DMPK	5.54228e-05	5.27838e-05	0.952385	0.621396
SRCIN1	5.6284e-05	5.363e-05	0.952847	0.719401
GREM2	5.63714e-05	5.37299e-05	0.953142	0.40509
HSBP1	0.0821807	0.0784927	0.955124	0.779448
UCHL3	0.102721	0.0981118	0.955127	0.118189
NEMF	0.000220414	0.00021066	0.955747	0.283269
MMADHC	5.33001e-05	5.09557e-05	0.956014	0.841697
CRADD	0.000162777	0.000155692	0.95647	0.422796
WDFY2	5.27996e-05	5.05752e-05	0.957871	0.126397
GP1BA	8.08894e-05	7.7525e-05	0.958408	0.866809
CD274	5.51363e-05	5.29186e-05	0.959777	0.581568
RAB18	1.20764	1.15922	0.959906	0.42269
NAPA	3.66783	3.52536	0.961158	0.229107
PARP4	0.0310468	0.0298433	0.961234	3.94245e-06
CPNE3	4.13811	3.98316	0.962555	0.748249
PRSS8	5.75561e-05	5.54443e-05	0.963308	0.354086
HSPB1	1818.22	1752.7	0.963961	0.864969
MYO5C	6.18476e-05	5.96375e-05	0.964266	0.773325
PLLP	8.44955e-05	8.14929e-05	0.964464	0.113952
JHDM1D	5.43042e-05	5.24029e-05	0.964988	0.863367
CTNNA1	5.66014	5.46296	0.965164	0.440926
PPCS	0.00790088	0.00762639	0.965258	0.0554348
IMPA2	0.000731501	0.000706109	0.965288	0.127943
MOB2	0.000315653	0.00030485	0.965776	0.0824674
UFC1	0.000184575	0.000178327	0.966148	0.310529
LSMD1	5.23058e-05	5.05817e-05	0.967039	0.118228
FASN	4.26112	4.12131	0.967191	0.748448
MYO6	0.584422	0.565766	0.968077	0.796071
CRYBG3	8.77543e-05	8.49647e-05	0.968212	0.904428
ADH1B	0.0218596	0.0211712	0.968507	0.332671
HOOK2	7.19257e-05	6.96815e-05	0.968799	0.928996
TBC1D17	0.0138948	0.0134619	0.968845	0.00184169
SPHKAP	7.06921e-05	6.85547e-05	0.969764	0.145927
LPCAT4	0.000107971	0.00010471	0.9698	0.468808
CHST11	6.0302e-05	5.85101e-05	0.970285	0.36734
OPTN	0.00033331	0.000323619	0.970926	0.322648
NEGR1	5.34076e-05	5.19124e-05	0.972005	0.250175
PGC	5.4784e-05	5.32886e-05	0.972704	0.296549
ATP5S	0.00134709	0.00131056	0.972885	0.0001757
EPS8L3	5.36842e-05	5.22434e-05	0.973161	0.810611
PON1	0.204917	0.199542	0.973767	0.0384382
CTSV	5.72708e-05	5.58031e-05	0.974372	0.761296
SIMC1	5.21949e-05	5.08758e-05	0.974727	0.599986
COMT	1.89528	1.84952	0.975858	0.0107333
SMG1	0.000109042	0.000106414	0.975897	0.966666
ZMYND11	5.19981e-05	5.07527e-05	0.97605	0.403818
ISM2	5.33985e-05	5.21328e-05	0.976297	0.459929
FLII	0.489676	0.478473	0.977122	0.390978
SHANK3	5.46931e-05	5.34501e-05	0.977273	0.849176
FOXM1	5.76088e-05	5.63279e-05	0.977765	0.819247
CA1	74.6182	72.9774	0.978011	0.913986
RRAGA	6.81696e-05	6.66844e-05	0.978213	0.289157
F2	0.352613	0.344963	0.978304	0.0490131
TMUB1	5.5138e-05	5.39526e-05	0.978502	0.825316
HIST1H1E	6.49071e-05	6.35485e-05	0.979069	0.493284
SERPINB6	4.22155	4.13439	0.979353	0.871376
ZFYVE19	0.00117872	0.00115542	0.980228	0.0126732
F13B	0.000104517	0.000102465	0.980363	0.103987
ADAMTS20	5.23016e-05	5.13786e-05	0.982353	0.220928
SULT1A1	5.37372e-05	5.28425e-05	0.98335	0.897123
CCDC6	0.759072	0.747664	0.984971	0.943171
TECR	0.224687	0.22139	0.985329	0.0434475
MASP1	6.7709e-05	6.67553e-05	0.985915	0.817544
SUGT1	0.157091	0.154921	0.986183	0.00129666
KIAA1279	9.35086e-05	9.22256e-05	0.98628	0.22105
LOC100508736	5.47078e-05	5.39637e-05	0.986398	0.444668
FAM214B	5.12912e-05	5.06047e-05	0.986616	0.265777
PCBD2	5.34535e-05	5.27932e-05	0.987648	0.127577
WDR45B	0.000160997	0.000159016	0.987698	0.668886
TLDC1	0.0113395	0.011203	0.987965	0.801691
ESRP2	0.000114549	0.000113308	0.98917	0.961555
EBP	8.01341e-05	7.92707e-05	0.989225	0.0669305
WNT5B	5.25844e-05	5.20405e-05	0.989655	0.878971
SENP6	5.12863e-05	5.07616e-05	0.989771	0.327183
FYCO1	0.00450183	0.00445805	0.990275	0.412608
RTN2	5.23867e-05	5.1926e-05	0.991206	0.763429
FAR1	8.9433e-05	8.86615e-05	0.991373	0.484548
CALCOCO1	8.25442e-05	8.19281e-05	0.992536	0.743201
CADM4	6.18112e-05	6.13606e-05	0.992709	0.703357
C2orf76	6.19729e-05	6.15567e-05	0.993283	0.98415
PAK3	5.11857e-05	5.08717e-05	0.993864	0.768332
C1GALT1	5.11343e-05	5.08615e-05	0.994665	0.90141
ACTRT3	5.12589e-05	5.09915e-05	0.994785	0.925038
ACADVL	6.02442	5.99321	0.994819	0.957965
RPS4Y1	5.63643e-05	5.60849e-05	0.995043	0.826383
ACACB	5.1091e-05	5.08737e-05	0.995745	0.892617
CNKSR1	7.8483e-05	7.82068e-05	0.996481	0.521389
SYT1	5.11478e-05	5.09771e-05	0.996663	0.676517
TAF1C	5.09833e-05	5.08262e-05	0.996919	0.763292
GNG5	5.11319e-05	5.09907e-05	0.99724	0.613656
TTLL1	5.10887e-05	5.09581e-05	0.997444	0.614392
INHBA	5.10812e-05	5.09933e-05	0.998279	0.540834
GSKIP	6.77721e-05	6.76767e-05	0.998592	0.273962
FOS	5.07793e-05	5.07132e-05	0.998698	0.644343
GPR155	5.108e-05	5.10397e-05	0.999213	0.48548
LYST	5.6772e-05	5.67429e-05	0.999487	0.335197
CWF19L2	6.31507e-05	6.31194e-05	0.999505	0.128486
EEA1	0.520831	0.521056	1.00043	0.800837
HACE1	5.23468e-05	5.23871e-05	1.00077	0.390392
CA2	6.68283	6.68837	1.00083	0.977371
RNF11	8.39874e-05	8.40761e-05	1.00106	0.99748
CPM	5.27371e-05	5.27944e-05	1.00109	0.661219
HIF1A	5.11966e-05	5.12818e-05	1.00166	0.349016
MYH15	5.48955e-05	5.49916e-05	1.00175	0.856805
CRTAC1	9.88901e-05	9.9239e-05	1.00353	0.23652
RNF17	5.08449e-05	5.11219e-05	1.00545	0.948051
ZNF438	5.17824e-05	5.20793e-05	1.00573	0.721377
ALAD	2.11685	2.13015	1.00628	0.0976685
CCDC154	5.1659e-05	5.19898e-05	1.0064	0.361778
NR5A2	5.84807e-05	5.89122e-05	1.00738	0.476428
PCDH7	5e-05	5.04399e-05	1.0088	0.38683
SH3BP4	5.10594e-05	5.15132e-05	1.00889	0.883022
DSC1	8.58277e-05	8.66412e-05	1.00948	0.224239
FBRSL1	5.09975e-05	5.14909e-05	1.00967	0.74141
PLXND1	5e-05	5.05038e-05	1.01008	0.38683
LZTS1	5.10833e-05	5.16141e-05	1.01039	0.775174
PPAPDC2	0.000151088	0.000152714	1.01076	0.755594
DNAJB2	0.00285838	0.00289033	1.01118	0.309679
HLA.DOA	5e-05	5.05591e-05	1.01118	0.38683
TGOLN2	5.07544e-05	5.13278e-05	1.0113	0.434651
RNF34	5e-05	5.05683e-05	1.01137	0.38683
SUOX	9.4421e-05	9.55262e-05	1.0117	0.35068
KHK	5e-05	5.06134e-05	1.01227	0.38683
CLVS2	5e-05	5.06249e-05	1.0125	0.38683
LTBP3	5e-05	5.06313e-05	1.01263	0.38683
MRPL21	8.45754e-05	8.56493e-05	1.0127	0.698766
CTSL	5e-05	5.06556e-05	1.01311	0.38683
DESI2	5e-05	5.06622e-05	1.01324	0.38683
POLG2	5e-05	5.06699e-05	1.0134	0.38683
SLC6A9	5e-05	5.06826e-05	1.01365	0.38683
DUSP27	5.09113e-05	5.16088e-05	1.0137	0.419962
MAPK1IP1L	5e-05	5.06879e-05	1.01376	0.38683
CDK16	5e-05	5.06971e-05	1.01394	0.38683
SOX10	5e-05	5.07147e-05	1.01429	0.38683
NOS1	5.1073e-05	5.18094e-05	1.01442	0.436562
MAMDC2	5e-05	5.07216e-05	1.01443	0.38683
CRYZL1	0.000521852	0.000529385	1.01443	0.744666
FCGR2B	5e-05	5.07386e-05	1.01477	0.38683
MT1X	5e-05	5.0739e-05	1.01478	0.38683
NEURL	5e-05	5.07599e-05	1.0152	0.38683
SIGIRR	5e-05	5.07609e-05	1.01522	0.38683
HERC5	5.07616e-05	5.15364e-05	1.01526	0.292179
HSF4	5e-05	5.07633e-05	1.01527	0.38683
SYCN	5e-05	5.07637e-05	1.01527	0.38683
GEMIN8	5e-05	5.07686e-05	1.01537	0.38683
MMP20	5e-05	5.07718e-05	1.01544	0.38683
CDC45	5e-05	5.07743e-05	1.01549	0.38683
FAM26F	5e-05	5.07767e-05	1.01553	0.38683
WNT2B	5.47052e-05	5.55579e-05	1.01559	0.939626
PTHLH	5e-05	5.07797e-05	1.01559	0.38683
EHMT2	5e-05	5.07826e-05	1.01565	0.38683
SEMA6D	5e-05	5.07829e-05	1.01566	0.38683
XBP1	5.13587e-05	5.21646e-05	1.01569	0.512553
TRIM32	7.28026e-05	7.39569e-05	1.01585	0.916823
HBD	3656.24	3714.34	1.01589	0.27277
BZW1	0.0819277	0.0832304	1.0159	0.397933
CDA	5e-05	5.07966e-05	1.01593	0.38683
KIAA1324	5e-05	5.07982e-05	1.01596	0.38683
ANAPC15	5e-05	5.08011e-05	1.01602	0.38683
MST1R	5e-05	5.08148e-05	1.0163	0.38683
GPSM1	5e-05	5.0815e-05	1.0163	0.38683
RAB11FIP4	5e-05	5.08184e-05	1.01637	0.38683
C5orf24	5e-05	5.0822e-05	1.01644	0.38683
TMEM88B	5e-05	5.08238e-05	1.01648	0.38683
RNF113A	5e-05	5.08287e-05	1.01657	0.38683
LBH	5e-05	5.08297e-05	1.01659	0.38683
GRB10	5e-05	5.08381e-05	1.01676	0.38683
RIPK2	5e-05	5.08405e-05	1.01681	0.38683
MDK	5e-05	5.0854e-05	1.01708	0.38683
RORA	5e-05	5.08583e-05	1.01717	0.38683
IRAK3	5e-05	5.08586e-05	1.01717	0.38683
FBXO18	5.08667e-05	5.17419e-05	1.0172	0.278922
FAM170A	5e-05	5.0862e-05	1.01724	0.38683
SORCS1	5.07989e-05	5.16765e-05	1.01728	0.378702
MARVELD1	5e-05	5.08677e-05	1.01735	0.38683
PTGIS	0.00259517	0.00264049	1.01747	0.204525
NOX3	5.23101e-05	5.32241e-05	1.01747	0.972502
LOC101060459	5e-05	5.08745e-05	1.01749	0.38683
FPGT	5.19331e-05	5.2859e-05	1.01783	0.732009
SMPX	5e-05	5.08943e-05	1.01789	0.38683
KLK14	5e-05	5.09002e-05	1.018	0.38683
MMP13	5e-05	5.09019e-05	1.01804	0.38683
VMAC	5.13963e-05	5.23282e-05	1.01813	0.370642
SNUPN	5.11009e-05	5.20313e-05	1.01821	0.340555
MTHFSD	5e-05	5.09119e-05	1.01824	0.38683
CASC1	5e-05	5.09152e-05	1.0183	0.38683
SELPLG	5e-05	5.09229e-05	1.01846	0.38683
HOPX	5e-05	5.09254e-05	1.01851	0.38683
ALS2CR11	5e-05	5.09267e-05	1.01853	0.38683
GTPBP6	5e-05	5.09284e-05	1.01857	0.38683
GNA12	5e-05	5.09388e-05	1.01878	0.38683
CDR2L	5e-05	5.09465e-05	1.01893	0.38683
PRG3	5e-05	5.09482e-05	1.01896	0.38683
ARPP21	5e-05	5.09498e-05	1.019	0.38683
CD68	5e-05	5.09517e-05	1.01903	0.38683
KIAA0319	5e-05	5.0963e-05	1.01926	0.38683
TMEM206	5e-05	5.09655e-05	1.01931	0.38683
TMED3	7.43114e-05	7.5759e-05	1.01948	0.604633
TIMM23	5e-05	5.09779e-05	1.01956	0.38683
DDX51	5.18491e-05	5.28711e-05	1.01971	0.856325
NRG1	5e-05	5.09859e-05	1.01972	0.38683
SLC24A2	5.11959e-05	5.22111e-05	1.01983	0.823719
LENG1	5e-05	5.09957e-05	1.01991	0.38683
FHOD3	5e-05	5.09978e-05	1.01996	0.38683
ZNF280C	5e-05	5.10023e-05	1.02005	0.38683
FAM26E	5e-05	5.10132e-05	1.02026	0.38683
PYURF	5e-05	5.10146e-05	1.02029	0.38683
PCYT1B	5e-05	5.10168e-05	1.02034	0.38683
NCAM2	5e-05	5.10177e-05	1.02035	0.38683
PDILT	5.07027e-05	5.17383e-05	1.02042	0.326459
NOMO2	5e-05	5.10258e-05	1.02052	0.38683
PTPLAD2	5e-05	5.10259e-05	1.02052	0.38683
SLFN12L	5e-05	5.10424e-05	1.02085	0.38683
HIGD1A	5e-05	5.10514e-05	1.02103	0.38683
FAM180A	5e-05	5.10607e-05	1.02121	0.38683
CST6	5e-05	5.10611e-05	1.02122	0.38683
POLR3H	5e-05	5.10743e-05	1.02149	0.38683
PHACTR2	5e-05	5.10828e-05	1.02166	0.38683
NBR1	5.36029e-05	5.47658e-05	1.02169	0.658332
USP4	0.000104401	0.000106676	1.02178	0.740738
PIP5K1C	5.11555e-05	5.22721e-05	1.02183	0.944887
SFRP4	5e-05	5.10926e-05	1.02185	0.38683
PPDPF	5e-05	5.11002e-05	1.022	0.38683
ND3	5e-05	5.11155e-05	1.02231	0.38683
GALK1	1.31669	1.34634	1.02252	5.06534e-07
TTC28	5e-05	5.11292e-05	1.02258	0.38683
FAM122B	5e-05	5.11338e-05	1.02268	0.38683
RPS27L	0.000242455	0.000248043	1.02305	0.296737
MED31	5e-05	5.11525e-05	1.02305	0.38683
SLC26A2	5.23068e-05	5.35148e-05	1.0231	0.53255
PARP2	5e-05	5.11603e-05	1.02321	0.38683
GYPC	0.00128447	0.0013143	1.02322	0.337602
EDARADD	5.38534e-05	5.51097e-05	1.02333	0.303437
FTHL17	5e-05	5.11692e-05	1.02338	0.38683
IGFBP4	5e-05	5.11803e-05	1.02361	0.38683
SMIM7	5.11049e-05	5.23227e-05	1.02383	0.462861
BCL11B	5.18437e-05	5.30843e-05	1.02393	0.444456
ABCC5	5.52809e-05	5.66174e-05	1.02418	0.247938
MED28	5.13536e-05	5.26007e-05	1.02428	0.798401
PTAR1	5.11003e-05	5.23482e-05	1.02442	0.585086
WDR45	5e-05	5.12265e-05	1.02453	0.221547
PRDX5	61.6414	63.1563	1.02458	0.149727
TNFRSF21	5.87178e-05	6.01684e-05	1.0247	0.245549
USP47	0.00350257	0.00358945	1.02481	0.107082
HLA.DPA1	5e-05	5.12421e-05	1.02484	0.38683
IMPDH2	2.72652	2.79432	1.02487	0.508815
RHOQ	5e-05	5.12459e-05	1.02492	0.38683
AP4M1	6.29206e-05	6.45206e-05	1.02543	0.750932
PDCD2L	5.09677e-05	5.22663e-05	1.02548	0.349268
SMPD1	5e-05	5.12783e-05	1.02557	0.227507
CD3EAP	5.56641e-05	5.71001e-05	1.0258	0.49598
CTNND1	5.24581	5.38198	1.02596	0.702383
SLC4A1	6.85299	7.03271	1.02622	0.847592
FOSL2	6.47041e-05	6.6418e-05	1.02649	0.342738
RSPH3	5e-05	5.13291e-05	1.02658	0.269367
NDUFS8	0.100997	0.103737	1.02713	1.50652e-05
SORL1	5.25909e-05	5.40315e-05	1.02739	0.326815
HBB	10724.5	11018.9	1.02745	0.760652
BMPR2	5.85589e-05	6.0167e-05	1.02746	0.960083
ATP8B4	5e-05	5.1376e-05	1.02752	0.226891
CYP2W1	5e-05	5.13911e-05	1.02782	0.38683
CCDC171	5e-05	5.1406e-05	1.02812	0.356759
FAM187B	5e-05	5.14177e-05	1.02835	0.338125
CCL16	5.2316e-05	5.3818e-05	1.02871	0.303708
TMEM2	5e-05	5.14428e-05	1.02886	0.240195
CYTH2	5.63702e-05	5.80041e-05	1.02898	0.513037
LTA4H	7.07423	7.28021	1.02912	0.631768
ANG	5e-05	5.14635e-05	1.02927	0.30391
PHF5A	5.83308e-05	6.00395e-05	1.02929	0.231462
PLCL1	5e-05	5.1468e-05	1.02936	0.246241
ECD	5.10204e-05	5.2524e-05	1.02947	0.32617
ANKH	5.09175e-05	5.24239e-05	1.02958	0.293029
WDR24	5e-05	5.14894e-05	1.02979	0.222992
SYBU	5e-05	5.14942e-05	1.02988	0.290734
IGFBP5	5e-05	5.14949e-05	1.0299	0.380832
B3GALT6	5.07417e-05	5.22676e-05	1.03007	0.308218
DCAKD	0.0114419	0.0117862	1.03009	0.743082
SGCD	0.000753627	0.000776329	1.03012	0.404509
SPATA9	8.31782e-05	8.5691e-05	1.03021	0.968553
PTPRD	5e-05	5.15114e-05	1.03023	0.371442
NCKAP1	0.531441	0.547584	1.03038	0.799969
SEC22A	5.11643e-05	5.27418e-05	1.03083	0.367445
CENPF	5.5759e-05	5.74814e-05	1.03089	0.403209
FAM65B	5e-05	5.15453e-05	1.03091	0.254761
SUPT20H	5.55731e-05	5.72984e-05	1.03104	0.563584
RAB15	0.0207299	0.0213769	1.03121	0.626823
PPP1R7	0.896988	0.925335	1.0316	0.00048184
SSH1	0.000120819	0.000124643	1.03165	0.630805
CEP135	5e-05	5.15861e-05	1.03172	0.315787
AP3S2	5e-05	5.15879e-05	1.03176	0.253835
TREX1	5e-05	5.15947e-05	1.03189	0.238128
SLC35A2	5e-05	5.15976e-05	1.03195	0.234053
MFSD5	6.51192e-05	6.72153e-05	1.03219	0.794719
FAM21A	5e-05	5.16196e-05	1.03239	0.22917
APBB2	5e-05	5.16233e-05	1.03247	0.321385
CAP2	8.52345e-05	8.8025e-05	1.03274	0.484464
KIF3B	5e-05	5.16395e-05	1.03279	0.227694
TRPM2	5e-05	5.16401e-05	1.0328	0.232549
TIMM17A	5e-05	5.16456e-05	1.03291	0.251773
ZNF239	5.19803e-05	5.37012e-05	1.03311	0.524952
ATAD3B	5e-05	5.16601e-05	1.0332	0.232719
ALX1	5e-05	5.16735e-05	1.03347	0.259848
RMND1	5e-05	5.16814e-05	1.03363	0.22358
ERN1	6.44582e-05	6.66347e-05	1.03377	0.29536
KCTD9	0.000114678	0.000118553	1.03379	0.642026
FRK	6.29311e-05	6.50613e-05	1.03385	0.577847
MCM10	5.47408e-05	5.65969e-05	1.03391	0.887092
SETD1A	5.11343e-05	5.28712e-05	1.03397	0.390677
RPL26L1	6.36162e-05	6.57948e-05	1.03425	0.799235
PPCDC	5.11659e-05	5.29271e-05	1.03442	0.88036
SPRR1A	5e-05	5.17216e-05	1.03443	0.245734
CUL3	0.525517	0.543652	1.03451	0.0115668
CTIF	5.47429e-05	5.66356e-05	1.03457	0.391924
ATG4D	5e-05	5.17474e-05	1.03495	0.269571
C11orf96	5e-05	5.175e-05	1.035	0.221405
TRMT12	5e-05	5.17673e-05	1.03535	0.189914
KMO	6.85105e-05	7.09537e-05	1.03566	0.875913
SLC6A3	5e-05	5.18e-05	1.036	0.305144
GPRIN3	5e-05	5.18205e-05	1.03641	0.223781
XIRP2	5e-05	5.1845e-05	1.0369	0.171324
ENPP1	5.47231e-05	5.67549e-05	1.03713	0.305121
PKLR	6.69132e-05	6.94108e-05	1.03733	0.42818
WWC2	5e-05	5.18883e-05	1.03777	0.368056
OR51F1	5.13941e-05	5.33373e-05	1.03781	0.823519
TRIM71	5e-05	5.18968e-05	1.03794	0.24204
DOCK4	5e-05	5.1909e-05	1.03818	0.1883
CTSK	5e-05	5.1922e-05	1.03844	0.237075
ARHGEF19	5e-05	5.19262e-05	1.03852	0.320678
ABTB2	5.13521e-05	5.3351e-05	1.03893	0.765455
TGFB2	5e-05	5.19487e-05	1.03897	0.252081
ABAT	0.0224216	0.0233039	1.03935	9.59809e-05
BANK1	5.21749e-05	5.42339e-05	1.03946	0.347539
MPC1	5e-05	5.20023e-05	1.04005	0.153481
CD5L	5.78614e-05	6.01953e-05	1.04033	0.416912
SLPI	5e-05	5.20203e-05	1.04041	0.383633
AGPAT6	5e-05	5.20318e-05	1.04064	0.313296
ZBTB24	5e-05	5.20342e-05	1.04068	0.220764
ACOT1	5e-05	5.2037e-05	1.04074	0.248727
ZFYVE26	5.12364e-05	5.33324e-05	1.04091	0.15321
TNNT2	5e-05	5.20458e-05	1.04092	0.294324
GSTA4	8.96011e-05	9.32826e-05	1.04109	0.0735622
SAP130	5e-05	5.20586e-05	1.04117	0.2877
MBOAT1	5e-05	5.20921e-05	1.04184	0.235116
DUSP11	5e-05	5.21079e-05	1.04216	0.309085
KIFC2	5e-05	5.21252e-05	1.0425	0.222026
FKBP14	5e-05	5.21426e-05	1.04285	0.357511
TTC29	5e-05	5.21721e-05	1.04344	0.164571
ENTPD3	5e-05	5.2173e-05	1.04346	0.25975
SPICE1	5e-05	5.21781e-05	1.04356	0.315662
LIMD2	5e-05	5.21898e-05	1.0438	0.249648
VDAC1	6.0082	6.27138	1.0438	0.318923
TENM2	5.09821e-05	5.32204e-05	1.0439	0.391934
FAM53C	5e-05	5.22053e-05	1.04411	0.316926
CLUH	0.164819	0.172102	1.04418	5.09998e-05
CD93	5e-05	5.22173e-05	1.04435	0.162292
MKRN2	7.3309e-05	7.6568e-05	1.04446	0.424645
WNT7A	5.09268e-05	5.3213e-05	1.04489	0.193243
FOXO4	5e-05	5.22449e-05	1.0449	0.242875
GCSH	5.09538e-05	5.32417e-05	1.0449	0.186611
KLC1	0.0730983	0.0763901	1.04503	8.96605e-06
EIF1AY	5e-05	5.22583e-05	1.04517	0.230201
MPP4	5.11198e-05	5.34316e-05	1.04522	0.28841
AP1S3	0.000113373	0.000118527	1.04546	0.437017
CST4	5e-05	5.2277e-05	1.04554	0.221034
DYNLT3	5e-05	5.22984e-05	1.04597	0.379887
ABCA13	7.82791e-05	8.18823e-05	1.04603	0.366464
BAI2	5e-05	5.23063e-05	1.04613	0.14829
CDAN1	5.12449e-05	5.36122e-05	1.0462	0.28533
CRISPLD2	5e-05	5.23116e-05	1.04623	0.259751
ANKRD54	5e-05	5.23257e-05	1.04651	0.203227
CD59	5.42518e-05	5.67854e-05	1.0467	0.454753
TMEM258	5e-05	5.23453e-05	1.04691	0.224513
LRRC15	5.26976e-05	5.51779e-05	1.04707	0.511494
FAM212A	5e-05	5.23548e-05	1.0471	0.256076
SNAPC3	5e-05	5.23579e-05	1.04716	0.150029
GZMM	5e-05	5.23624e-05	1.04725	0.141821
CYFIP1	0.609871	0.638723	1.04731	0.0718897
MB	5e-05	5.23722e-05	1.04744	0.284529
GBE1	0.0067412	0.0070611	1.04746	0.0931677
DSTN	6.58929	6.90204	1.04746	0.152018
TRAFD1	5.06993e-05	5.31057e-05	1.04747	0.138812
APOA4	1.89247	1.98247	1.04756	0.361371
ARHGEF5	5e-05	5.2381e-05	1.04762	0.166909
CAMK2D	0.28136	0.294761	1.04763	0.001668
NR3C2	5e-05	5.24063e-05	1.04813	0.176506
FADS6	5e-05	5.24086e-05	1.04817	0.254506
CALB1	5e-05	5.242e-05	1.0484	0.312155
RNF121	5e-05	5.24304e-05	1.04861	0.141175
HK1	3.22294	3.37966	1.04863	0.22122
GLTPD1	7.4923e-05	7.85678e-05	1.04865	0.761532
TNFRSF6B	5e-05	5.24538e-05	1.04908	0.152211
ACSS3	5e-05	5.24578e-05	1.04916	0.137804
MAD2L2	5e-05	5.24652e-05	1.0493	0.149926
NEUROD6	5e-05	5.24865e-05	1.04973	0.369084
QARS	1.88926	1.98521	1.05078	0.555223
XPR1	5e-05	5.25397e-05	1.05079	0.172954
IRX5	5e-05	5.25503e-05	1.05101	0.163021
USP40	5.07278e-05	5.3316e-05	1.05102	0.241491
AUNIP	5e-05	5.25576e-05	1.05115	0.249251
COPRS	5e-05	5.25592e-05	1.05118	0.350886
MIF4GD	5.57548e-05	5.862e-05	1.05139	0.37324
ACSM3	9.22117e-05	9.69678e-05	1.05158	0.178601
SH3RF2	7.3891e-05	7.77105e-05	1.05169	0.984257
CST1	5.34855e-05	5.62509e-05	1.0517	0.856139
ITPRIP	0.000139823	0.000147054	1.05172	0.586315
PRDM2	5e-05	5.2615e-05	1.0523	0.149928
CAPNS1	3.47295	3.65496	1.05241	0.187096
MADD	5e-05	5.26263e-05	1.05253	0.0741287
TP53BP2	5e-05	5.26303e-05	1.05261	0.134011
CASC3	5.11889e-05	5.38884e-05	1.05274	0.268082
SSH3	0.331241	0.348755	1.05287	3.14136e-05
RGL2	5.46829e-05	5.75742e-05	1.05287	0.15437
STON2	5.61202e-05	5.91079e-05	1.05324	0.412275
VIT	5e-05	5.26678e-05	1.05336	0.139919
CARD16	5.1355e-05	5.40953e-05	1.05336	0.323394
ZNF655	5e-05	5.26844e-05	1.05369	0.290369
RAB5B	2.07207	2.18339	1.05373	7.56002e-06
EHMT1	5.1069e-05	5.38182e-05	1.05383	0.349769
LMBRD2	5e-05	5.27014e-05	1.05403	0.177063
STARD3	5e-05	5.27028e-05	1.05406	0.180388
CCNL1	5e-05	5.27103e-05	1.05421	0.162785
C16orf55	5e-05	5.27145e-05	1.05429	0.35427
PRPH	0.000146682	0.000154677	1.05451	0.0306805
EIF6	7.57866	7.99185	1.05452	0.000150528
VEZF1	5e-05	5.27826e-05	1.05565	0.29236
KCNA10	5.15744e-05	5.44481e-05	1.05572	0.459808
HIVEP2	5e-05	5.27998e-05	1.056	0.347598
ADRB1	5e-05	5.28037e-05	1.05607	0.136455
CDK5RAP1	5e-05	5.28293e-05	1.05659	0.114147
PIAS1	5e-05	5.28297e-05	1.05659	0.267091
VSNL1	1.53477	1.62181	1.05671	0.00016296
INPP5A	5e-05	5.28402e-05	1.0568	0.201294
ALDH1A2	5.12217e-05	5.41375e-05	1.05692	0.236152
IFT140	5e-05	5.28607e-05	1.05721	0.0841047
TTC5	5e-05	5.28673e-05	1.05735	0.220471
SPARCL1	5.48004e-05	5.79462e-05	1.0574	0.431176
MYT1	5e-05	5.28732e-05	1.05746	0.0595253
PLP2	0.00477627	0.00505188	1.0577	0.834245
CTSZ	5e-05	5.29045e-05	1.05809	0.132553
SMAD5	5e-05	5.29065e-05	1.05813	0.159157
GSPT2	5e-05	5.29173e-05	1.05835	0.218746
INPP4B	5e-05	5.2918e-05	1.05836	0.163003
DBNL	3.28862	3.48103	1.05851	0.189886
PCMTD1	0.000280612	0.000297047	1.05857	0.126111
PASD1	5e-05	5.29294e-05	1.05859	0.0961318
USP25	5.40292e-05	5.72043e-05	1.05877	0.552727
CAPN13	5e-05	5.2941e-05	1.05882	0.213124
HLA.DMA	5.18592e-05	5.49446e-05	1.0595	0.244518
AKR1D1	5.36393e-05	5.68389e-05	1.05965	0.121788
DGKA	0.508566	0.539189	1.06021	0.753217
GEMIN2	5e-05	5.30319e-05	1.06064	0.125783
ZC3H8	5e-05	5.3035e-05	1.0607	0.170508
C6orf57	5e-05	5.30445e-05	1.06089	0.172981
TMOD1	0.000241614	0.000256348	1.06098	0.937494
RYR1	5e-05	5.305e-05	1.061	0.141909
CYP4F3	5.29709e-05	5.62027e-05	1.06101	0.257235
TIMP3	9.92059e-05	0.00010527	1.06113	0.0888851
NR6A1	5e-05	5.30634e-05	1.06127	0.160287
SIPA1L2	5.16058e-05	5.47763e-05	1.06144	0.135495
FITM2	5.28323e-05	5.60979e-05	1.06181	0.174712
KDM1B	5e-05	5.31032e-05	1.06206	0.195134
TBKBP1	5e-05	5.31063e-05	1.06213	0.138362
SOGA1	5e-05	5.31086e-05	1.06217	0.313043
CIT	5e-05	5.31217e-05	1.06243	0.273165
MPDZ	5e-05	5.31393e-05	1.06279	0.186417
FAIM	5e-05	5.31545e-05	1.06309	0.088293
SCYL3	5.0641e-05	5.3836e-05	1.06309	0.150692
VKORC1	5e-05	5.31567e-05	1.06313	0.183478
NCOA7	5e-05	5.31607e-05	1.06321	0.322196
ANXA11	5.22457	5.55495	1.06324	0.098327
SESN1	5e-05	5.31869e-05	1.06374	0.12748
PGLS	4.12088	4.38361	1.06375	0.000320275
MYD88	0.000838988	0.000892527	1.06381	0.980834
RECK	5e-05	5.31936e-05	1.06387	0.0976904
SMUG1	5e-05	5.31938e-05	1.06388	0.0831891
MOS	5.11073e-05	5.43721e-05	1.06388	0.168141
UVSSA	5e-05	5.3215e-05	1.0643	0.061627
ATP10A	5.09792e-05	5.4268e-05	1.06451	0.190775
MOCS1	5e-05	5.32313e-05	1.06463	0.10371
AMOTL1	5.10096e-05	5.43068e-05	1.06464	0.113155
X1.Mar	5e-05	5.3244e-05	1.06488	0.1454
GEMIN7	5e-05	5.32781e-05	1.06556	0.188205
CCDC71L	5e-05	5.32853e-05	1.06571	0.142083
CACNA1S	5e-05	5.33104e-05	1.06621	0.271904
C11orf73	0.000197716	0.000210879	1.06657	0.177227
NAPRT1	0.981286	1.04675	1.06671	0.000358968
ZNF219	5e-05	5.33396e-05	1.06679	0.15728
AOX1	5.17574e-05	5.52156e-05	1.06682	0.108057
AP4E1	5.07793e-05	5.41729e-05	1.06683	0.0972256
BLOC1S5	5e-05	5.33467e-05	1.06693	0.132376
AAMDC	5.58941e-05	5.9639e-05	1.067	0.274213
RPL26	0.0026993	0.00288196	1.06767	0.843943
NAA40	5e-05	5.33889e-05	1.06778	0.0922788
HPS3	5.19737e-05	5.5508e-05	1.068	0.102882
THBD	0.0128789	0.013758	1.06826	0.0025802
NDUFA11	5.56263e-05	5.94261e-05	1.06831	0.335987
SPECC1L	7.16295e-05	7.65416e-05	1.06858	0.865623
CFHR5	5e-05	5.3433e-05	1.06866	0.207421
POTEI	5e-05	5.34359e-05	1.06872	0.18484
APBA3	5.11466e-05	5.46691e-05	1.06887	0.480168
FAM65A	5e-05	5.34497e-05	1.06899	0.253192
PRR5	5e-05	5.34659e-05	1.06932	0.275461
RNF114	5e-05	5.34898e-05	1.0698	0.158504
CD53	5e-05	5.35033e-05	1.07007	0.189231
KAT6A	5.12126e-05	5.4815e-05	1.07034	0.192065
ZFYVE1	6.59113e-05	7.0553e-05	1.07042	0.754869
ARHGAP22	9.76438e-05	0.000104534	1.07057	0.41178
ARVCF	5e-05	5.35407e-05	1.07081	0.0967458
PGM2	2.28447	2.44627	1.07083	0.679569
PGM1	1.18096	1.26517	1.07131	0.00735938
MYCBPAP	5e-05	5.35672e-05	1.07134	0.180589
FAM129C	5.15339e-05	5.52119e-05	1.07137	0.177912
MIB2	5.24704e-05	5.62166e-05	1.0714	0.515723
SFT2D2	5e-05	5.35728e-05	1.07146	0.125502
MSLN	5e-05	5.35813e-05	1.07163	0.0704153
FAT1	5.0601e-05	5.42318e-05	1.07175	0.161101
CCM2	5e-05	5.3605e-05	1.0721	0.120804
APOB	2.01989	2.1656	1.07213	0.0144685
VIP	7.86419e-05	8.43198e-05	1.0722	0.0953739
CNP	0.346478	0.371597	1.0725	0.0119057
ME3	5.5682e-05	5.97194e-05	1.07251	0.150318
MFI2	5.09959e-05	5.46968e-05	1.07257	0.147834
CXCL14	5e-05	5.36872e-05	1.07374	0.255921
FAM63B	5.07494e-05	5.45205e-05	1.07431	0.260834
CCDC173	5.09363e-05	5.47223e-05	1.07433	0.104082
BHLHE41	8.58661e-05	9.22616e-05	1.07448	0.781603
PRSS23	5e-05	5.37524e-05	1.07505	0.37164
HARS	0.883972	0.950372	1.07512	0.0222212
DTD1	0.00135757	0.00145991	1.07538	0.00032375
KXD1	5e-05	5.3786e-05	1.07572	0.0708199
CTF1	5e-05	5.37913e-05	1.07583	0.145503
MAP3K15	5.11781e-05	5.50657e-05	1.07596	0.237986
EXT2	5e-05	5.38053e-05	1.07611	0.145682
HERC1	6.53695e-05	7.03593e-05	1.07633	0.222826
SUPT3H	5e-05	5.38168e-05	1.07634	0.378594
ZKSCAN1	5e-05	5.3833e-05	1.07666	0.0686266
ABHD4	5.44076e-05	5.85811e-05	1.07671	0.134919
TMEM50B	5e-05	5.38371e-05	1.07674	0.226584
GAB1	5.92903e-05	6.38415e-05	1.07676	0.301239
SMAD1	5e-05	5.38446e-05	1.07689	0.0965102
MFAP2	5e-05	5.38488e-05	1.07698	0.151602
ZC3H7A	5.10987e-05	5.50347e-05	1.07703	0.407709
DNAJB9	5.2223e-05	5.62568e-05	1.07724	0.213841
MYH7	5e-05	5.38624e-05	1.07725	0.357243
TLR3	5.3211e-05	5.7336e-05	1.07752	0.515601
RCSD1	5e-05	5.38772e-05	1.07754	0.0917391
GTF3C2	5.42571e-05	5.84725e-05	1.07769	0.350139
FGF19	5e-05	5.38923e-05	1.07785	0.117151
PRNP	5e-05	5.39005e-05	1.07801	0.218061
ARL6	5.09158e-05	5.48888e-05	1.07803	0.0763175
LOC100507369	5e-05	5.39077e-05	1.07815	0.102037
UNC13A	5.14922e-05	5.55308e-05	1.07843	0.153223
CCNT1	5e-05	5.39339e-05	1.07868	0.100697
NTM	5.09517e-05	5.49665e-05	1.0788	0.0800184
WIPI2	5.0972e-05	5.5e-05	1.07902	0.108815
SMG7	5e-05	5.39709e-05	1.07942	0.0798889
PARP16	5e-05	5.39812e-05	1.07962	0.0757398
ERI1	5.1215e-05	5.53181e-05	1.08011	0.440925
PIGG	5e-05	5.40079e-05	1.08016	0.110785
TRAPPC6B	5e-05	5.40135e-05	1.08027	0.105149
SCN11A	5.50601e-05	5.94829e-05	1.08033	0.172604
CD247	5e-05	5.40172e-05	1.08034	0.0705777
NUP210L	6.62875e-05	7.16694e-05	1.08119	0.089823
TDRKH	5e-05	5.40834e-05	1.08167	0.206621
NEK8	5e-05	5.40941e-05	1.08188	0.0872188
ATL1	5.76274e-05	6.23619e-05	1.08216	0.645712
NFATC1	5e-05	5.41179e-05	1.08236	0.162072
VAMP4	5e-05	5.41575e-05	1.08315	0.18141
COL5A3	5.11825e-05	5.54443e-05	1.08327	0.47484
DHX58	5.13298e-05	5.56082e-05	1.08335	0.549478
BCHE	6.00952e-05	6.5113e-05	1.0835	0.303304
COL14A1	3.22503	3.49447	1.08355	0.544558
DUSP14	7.75475e-05	8.40296e-05	1.08359	0.405567
ECT2	5e-05	5.41897e-05	1.08379	0.130992
COX15	5e-05	5.41943e-05	1.08389	0.123753
FETUB	6.15194e-05	6.66828e-05	1.08393	0.833421
ZNF735	5.14932e-05	5.58308e-05	1.08424	0.818332
PGAM1	9.30859	10.0931	1.08428	0.0151155
GPRC5C	5e-05	5.42168e-05	1.08434	0.374982
NDUFB1	0.000143495	0.000155628	1.08455	0.83567
C1orf95	6.28734e-05	6.82005e-05	1.08473	0.472021
KDM5B	5.20906e-05	5.6508e-05	1.0848	0.133139
GJA1	6.38459e-05	6.9261e-05	1.08482	0.410855
DYNLL2	5e-05	5.42446e-05	1.08489	0.129948
EZR	21.2018	23.0032	1.08496	0.0353754
FAM20B	5.09867e-05	5.53425e-05	1.08543	0.103021
ARAP3	5e-05	5.42766e-05	1.08553	0.238926
LYRM5	5e-05	5.42822e-05	1.08564	0.292641
NUAK1	8.7518e-05	9.50759e-05	1.08636	0.482907
PLA2G15	5e-05	5.43455e-05	1.08691	0.0567339
PRR3	5.11553e-05	5.56074e-05	1.08703	0.28945
SFT2D1	5e-05	5.43754e-05	1.08751	0.137291
CBR3	17.8923	19.4608	1.08766	4.3348e-10
FGD6	5e-05	5.44145e-05	1.08829	0.0765094
PLIN1	5.1215e-05	5.57395e-05	1.08834	0.201601
ACAT2	0.613639	0.667957	1.08852	0.00161085
SCAMP2	0.190774	0.207676	1.0886	0.329509
MARVELD2	5.39507e-05	5.87504e-05	1.08896	0.323392
SIGLEC1	5.09475e-05	5.54853e-05	1.08907	0.142215
PDZD11	0.00154759	0.00168599	1.08943	0.0158122
NCKAP5L	5.13847e-05	5.59829e-05	1.08949	0.841143
CARD10	5e-05	5.44746e-05	1.08949	0.132772
MYO18B	5.45984e-05	5.94864e-05	1.08953	0.103699
EFS	0.000101211	0.000110304	1.08984	0.354744
FNDC1	5e-05	5.45351e-05	1.0907	0.0713092
ERICH1	5e-05	5.45464e-05	1.09093	0.043142
ABCD1	5.18548e-05	5.65702e-05	1.09093	0.235161
RBMS1	5e-05	5.45629e-05	1.09126	0.0947689
GPR176	5.10759e-05	5.57488e-05	1.09149	0.129173
CKM	5.6075e-05	6.12098e-05	1.09157	0.356392
MAGED1	5e-05	5.45863e-05	1.09173	0.0979385
SH3TC2	5.08503e-05	5.55378e-05	1.09218	0.18752
CHEK2	5e-05	5.46338e-05	1.09268	0.0855783
HMBOX1	5e-05	5.46574e-05	1.09315	0.0495506
ARFRP1	5.26265e-05	5.75367e-05	1.0933	0.167937
HPS5	5e-05	5.46715e-05	1.09343	0.0253418
TXNDC17	26.2076	28.6653	1.09378	0.000882706
ARHGAP1	2.28008	2.49395	1.0938	0.00132888
COMP	5.29318e-05	5.7926e-05	1.09435	0.122218
RPS26	5.86792	6.42165	1.09437	5.18868e-05
CDSN	8.79803e-05	9.6324e-05	1.09484	0.327055
BOD1	5e-05	5.48074e-05	1.09615	0.0778699
TNNT1	5e-05	5.48082e-05	1.09616	0.0653988
PHLPP1	5.07834e-05	5.56678e-05	1.09618	0.0554776
WIBG	0.458018	0.502116	1.09628	0.895628
RAB14	7.69336	8.43503	1.0964	0.00513788
NKAP	5.31407e-05	5.82823e-05	1.09675	0.0584077
TNRC6B	5e-05	5.48523e-05	1.09705	0.0703934
FAM179B	0.00174472	0.0019146	1.09737	0.866985
CPS1	6.59213e-05	7.23409e-05	1.09738	0.195049
ATP6V1B2	2.77662	3.04771	1.09764	0.00631191
LDLRAP1	5.06769e-05	5.56385e-05	1.09791	0.047852
ANAPC16	5e-05	5.49003e-05	1.09801	0.198636
ESPN	0.000138646	0.000152237	1.09802	0.00268325
CCNB1	5e-05	5.49067e-05	1.09813	0.0972937
PLIN3	6.14813	6.75211	1.09824	0.0502309
CHD8	5e-05	5.49183e-05	1.09837	0.0418489
SRR	5.10647e-05	5.61013e-05	1.09863	0.144401
ALX4	5e-05	5.49357e-05	1.09871	0.11425
FCGR1A	5e-05	5.49387e-05	1.09877	0.144057
MAP2K7	5.25448e-05	5.77469e-05	1.099	0.408392
FRMD6	0.000100822	0.000110807	1.09904	0.468047
CCL20	5e-05	5.49754e-05	1.09951	0.087288
MIB1	5.16798e-05	5.68238e-05	1.09954	0.0703688
CSF1R	5e-05	5.49769e-05	1.09954	0.0510664
FBXO4	6.69105e-05	7.36e-05	1.09998	0.307714
TXNDC11	5e-05	5.50064e-05	1.10013	0.0210023
DNAJB14	5.27671e-05	5.80578e-05	1.10027	0.187247
DCN	10.5295	11.5865	1.10039	0.0551132
ATP8A1	5.17722e-05	5.69845e-05	1.10068	0.0943261
RABEPK	5.09927e-05	5.61284e-05	1.10071	0.0624049
KCNK1	5e-05	5.50368e-05	1.10074	0.0897418
PIP5K1A	5.15172e-05	5.67148e-05	1.10089	0.368369
MRPS15	7.29824e-05	8.03606e-05	1.1011	0.106071
CNST	5.0902e-05	5.60506e-05	1.10115	0.052504
SGCB	6.77597e-05	7.46402e-05	1.10154	0.274659
NT5DC2	9.6725e-05	0.000106571	1.1018	0.202565
ARF1	5e-05	5.51058e-05	1.10212	0.144819
UNC119	5e-05	5.51176e-05	1.10235	0.0954245
PHF23	5e-05	5.51231e-05	1.10246	0.0880811
ITGA8	5.20385e-05	5.73832e-05	1.10271	0.102186
EXOC4	0.232834	0.256811	1.10298	0.907244
PRF1	5.08517e-05	5.61014e-05	1.10324	0.0983547
HLCS	5.37236e-05	5.92849e-05	1.10352	0.365844
C2orf49	5.29668e-05	5.84673e-05	1.10385	0.485013
PGR	5e-05	5.51981e-05	1.10396	0.114768
B3GAT3	5.10612e-05	5.63802e-05	1.10417	0.143371
IGFALS	0.00953175	0.0105251	1.10422	0.0105186
NABP1	5.10796e-05	5.64038e-05	1.10423	0.15798
IRS2	5e-05	5.52148e-05	1.1043	0.192585
SNX3	1.9101	2.10934	1.10431	0.96772
RALBP1	5e-05	5.5237e-05	1.10474	0.187423
JPH2	0.000203744	0.000225149	1.10506	0.965001
CDCA3	5e-05	5.5253e-05	1.10506	0.0466707
ADPRH	5.09201e-05	5.63212e-05	1.10607	0.0990884
ENPEP	5e-05	5.53275e-05	1.10655	0.122785
IGFBP2	5.47563e-05	6.05923e-05	1.10658	0.165954
SYAP1	0.000451066	0.000499197	1.10671	0.143221
BAG3	0.957339	1.05973	1.10696	0.00140063
PSTPIP2	5.09996e-05	5.647e-05	1.10726	0.108904
GPCPD1	5.98261e-05	6.62469e-05	1.10732	0.313749
FBXL19	5e-05	5.53693e-05	1.10739	0.0948756
WDR66	5e-05	5.53783e-05	1.10757	0.201299
SLC4A11	5.13231e-05	5.68574e-05	1.10783	0.0863419
TPGS1	5.35282e-05	5.93087e-05	1.10799	0.179133
SYVN1	5e-05	5.54133e-05	1.10827	0.0803304
PHF1	5.14568e-05	5.70482e-05	1.10866	0.108
APEH	1.10689	1.22726	1.10875	0.0134609
PRSS3	0.0049668	0.00550764	1.10889	0.867079
ARID4B	5e-05	5.54749e-05	1.1095	0.25485
ATP6V1F	2.80504	3.11299	1.10978	0.0051371
UQCR11	6.47433e-05	7.18648e-05	1.11	0.90535
PEX2	5e-05	5.55116e-05	1.11023	0.0658134
SOAT1	5.12045e-05	5.68547e-05	1.11035	0.264964
MSL3	5e-05	5.55275e-05	1.11055	0.121061
TERF1	5e-05	5.55482e-05	1.11096	0.0348417
GALNT3	5.94333e-05	6.60485e-05	1.1113	0.286792
ROR2	5.07249e-05	5.63811e-05	1.11151	0.076487
RNF111	5e-05	5.55774e-05	1.11155	0.111536
DNLZ	5e-05	5.55864e-05	1.11173	0.0929202
CPXM1	5e-05	5.55894e-05	1.11179	0.0865192
DPCD	5.34471e-05	5.94227e-05	1.1118	0.11893
PLAA	0.100742	0.112026	1.11201	2.69558e-07
EI24	0.000269517	0.00029971	1.11202	0.935854
ACACA	0.0682149	0.0758726	1.11226	0.0450626
TMEM57	6.38954e-05	7.10683e-05	1.11226	0.187317
CCDC88A	5.18631e-05	5.77084e-05	1.11271	0.154477
NPAT	5.11894e-05	5.69658e-05	1.11284	0.0811619
CD4	5e-05	5.5664e-05	1.11328	0.208954
GAS2L1	5.13234e-05	5.7138e-05	1.11329	0.118842
ANAPC5	6.0555e-05	6.74385e-05	1.11367	0.179397
ZNF157	5e-05	5.56882e-05	1.11376	0.179236
HS3ST2	5.13054e-05	5.71515e-05	1.11395	0.344599
CADPS	5.31328e-05	5.91928e-05	1.11405	0.227179
EIF2AK3	5.06769e-05	5.64581e-05	1.11408	0.0190711
MERTK	5.43551e-05	6.05604e-05	1.11416	0.0769398
MRPL32	5e-05	5.57152e-05	1.1143	0.0617772
VPS37C	0.00447593	0.00498879	1.11458	0.00394068
N6AMT1	0.000101687	0.000113358	1.11478	0.86871
HES2	5e-05	5.57466e-05	1.11493	0.0323761
SLC32A1	5.11134e-05	5.70083e-05	1.11533	0.0500379
MKLN1	7.25466e-05	8.09209e-05	1.11543	0.155705
MKNK2	5.2683e-05	5.87861e-05	1.11585	0.159179
FLNC	1.59193	1.77667	1.11605	0.116566
CASP9	5.1767e-05	5.77795e-05	1.11615	0.27896
ATP6V1H	0.522464	0.583413	1.11666	0.427858
PEX13	5e-05	5.59146e-05	1.11829	0.0636547
HSD17B13	5.12804e-05	5.73592e-05	1.11854	0.239101
APBB1IP	5.11825e-05	5.72663e-05	1.11887	0.0913296
RNF25	5e-05	5.59476e-05	1.11895	0.061731
DHRS4	5.13202e-05	5.74555e-05	1.11955	0.107006
KIAA0146	5e-05	5.59852e-05	1.1197	0.0635303
KCTD5	5.13452e-05	5.75027e-05	1.11992	0.172748
CABP1	5e-05	5.6006e-05	1.12012	0.164961
ADCK5	5e-05	5.60132e-05	1.12026	0.0662118
CTDNEP1	5e-05	5.60136e-05	1.12027	0.046353
ATP2A2	3.31014	3.70827	1.12028	0.153161
UBAC2	0.00275686	0.00308961	1.1207	0.195549
TMEM102	5e-05	5.60379e-05	1.12076	0.0257529
TANK	5.11437e-05	5.73284e-05	1.12093	0.149764
MRGPRF	5.23863e-05	5.87277e-05	1.12105	0.115492
VAMP8	0.000172231	0.00019308	1.12105	0.322961
TMEM222	5.94548e-05	6.66526e-05	1.12106	0.681469
COL19A1	5.12484e-05	5.74742e-05	1.12148	0.340639
RAPGEF1	5e-05	5.60808e-05	1.12162	0.0210719
ATRX	5e-05	5.60971e-05	1.12194	0.0855282
ARHGEF4	5.08449e-05	5.70781e-05	1.12259	0.047351
PLCB2	5.36669e-05	6.02539e-05	1.12274	0.21589
NUSAP1	5.47013e-05	6.14164e-05	1.12276	0.358489
SEPP1	9.56476e-05	0.000107389	1.12276	0.0208484
SLC6A1	5e-05	5.61444e-05	1.12289	0.0916369
MMP1	5e-05	5.61459e-05	1.12292	0.0436352
RNF44	5e-05	5.61472e-05	1.12294	0.205521
EPG5	5e-05	5.61754e-05	1.12351	0.0793472
SDK1	5e-05	5.61879e-05	1.12376	0.0263541
FAM160B2	8.96063e-05	0.000100722	1.12405	0.114039
FBXO21	5e-05	5.62111e-05	1.12422	0.217872
GTF2H3	5e-05	5.62166e-05	1.12433	0.0480965
SRD5A1	5e-05	5.62818e-05	1.12564	0.0427974
BCL2L11	5e-05	5.62898e-05	1.1258	0.0938984
KIFAP3	5.21181e-05	5.86847e-05	1.126	0.236898
AAMP	5e-05	5.63061e-05	1.12612	0.0240713
OSTC	5e-05	5.63181e-05	1.12636	0.096637
CHCHD4	5.82046e-05	6.5562e-05	1.1264	0.20469
MIDN	5e-05	5.63327e-05	1.12665	0.129986
GALNT6	5.10526e-05	5.75225e-05	1.12673	0.0468362
PILRB	5.13875e-05	5.79222e-05	1.12716	0.23634
LAMC3	5.52058e-05	6.22404e-05	1.12743	0.354348
ABHD3	5e-05	5.63889e-05	1.12778	0.0934407
IFT74	5e-05	5.6389e-05	1.12778	0.205541
SHBG	7.55373e-05	8.5207e-05	1.12801	0.0673286
SFRP1	5e-05	5.64237e-05	1.12847	0.227159
MLH1	5.24587e-05	5.92159e-05	1.12881	0.127299
YWHAQ	13.5904	15.3429	1.12895	0.00491615
IPO13	5.19081e-05	5.86166e-05	1.12924	0.0634561
BSCL2	7.57041e-05	8.55026e-05	1.12943	0.23657
DENND3	5e-05	5.64841e-05	1.12968	0.0272381
WDR59	5.10787e-05	5.77027e-05	1.12968	0.0956949
CAMLG	5.07662e-05	5.73829e-05	1.13034	0.082902
ELP6	5e-05	5.65328e-05	1.13066	0.0870617
KPNA3	0.419072	0.473984	1.13103	0.967303
OAF	5e-05	5.6554e-05	1.13108	0.0822267
IDE	0.266902	0.301912	1.13117	2.83426e-05
ZNHIT2	5.36004e-05	6.06453e-05	1.13143	0.0257928
DLGAP1	5.15555e-05	5.83412e-05	1.13162	0.304415
NCAPG2	5.08196e-05	5.75166e-05	1.13178	0.0213831
MTG2	5e-05	5.66234e-05	1.13247	0.0559856
APOM	8.57348e-05	9.71193e-05	1.13279	0.496301
C1orf172	5e-05	5.66437e-05	1.13287	0.0196338
PLCD3	5.6194e-05	6.36693e-05	1.13303	0.665122
TNNI1	5e-05	5.66571e-05	1.13314	0.0509973
EIF4H	5.10631	5.78676	1.13326	0.0144937
FBXL6	5e-05	5.66849e-05	1.1337	0.175162
ANXA10	6.11871e-05	6.93705e-05	1.13375	0.780095
TTLL12	4.41483	5.00541	1.13377	1.45869e-05
PRKD1	5e-05	5.67126e-05	1.13425	0.257262
URGCP	5e-05	5.67408e-05	1.13482	0.118868
CHPF	5e-05	5.67475e-05	1.13495	0.03447
EZH2	5e-05	5.67693e-05	1.13539	0.105076
BLVRB	40.1891	45.6338	1.13548	0.00124087
AAR2	5.11044e-05	5.80449e-05	1.13581	0.119734
FBXO38	5.17552e-05	5.87844e-05	1.13581	0.0944632
TAGLN	90.682	103.003	1.13586	0.03857
TGS1	5.08772e-05	5.77896e-05	1.13586	0.0176073
EIF4E	0.00122439	0.00139134	1.13636	0.790894
KDELR1	5e-05	5.68354e-05	1.13671	0.118828
FGD5	5e-05	5.68385e-05	1.13677	0.0920786
TMEM184C	5.32319e-05	6.05446e-05	1.13737	0.0482082
STEAP4	6.94559e-05	7.9066e-05	1.13836	0.111249
ALDH4A1	0.810607	0.922781	1.13838	0.000554152
NAT8L	5e-05	5.69203e-05	1.13841	0.0195736
CEP170	5.22484e-05	5.94936e-05	1.13867	0.0451664
CELF2	5.10697e-05	5.81569e-05	1.13877	0.247095
VDAC2	10.3307	11.7656	1.13889	0.00146874
RNF5	5e-05	5.70016e-05	1.14003	0.0645032
UPK1B	5e-05	5.70069e-05	1.14014	0.0268973
GSDMB	5.24971e-05	5.98651e-05	1.14035	0.0992113
COX5B	2.12874	2.42804	1.1406	1.65085e-05
ARHGEF17	5.76309e-05	6.57595e-05	1.14105	0.2689
RB1CC1	5.13741e-05	5.86306e-05	1.14125	0.0561596
PYGB	3.12208	3.56427	1.14163	0.00154106
ST3GAL5	6.84187e-05	7.81285e-05	1.14192	0.309147
AP5M1	6.39728e-05	7.30523e-05	1.14193	0.10693
CD22	5.23833e-05	5.98304e-05	1.14217	0.135015
BMP2K	5.98796e-05	6.84099e-05	1.14246	0.479972
C3	23.2396	26.5525	1.14255	0.00758029
SIX4	5e-05	5.71304e-05	1.14261	0.0575257
ADAM15	9.65279e-05	0.000110355	1.14325	0.383916
EXOSC1	5.35991e-05	6.13214e-05	1.14407	0.0617638
GGA3	5.23173e-05	5.98609e-05	1.14419	0.277124
PI4K2B	5.20732e-05	5.95921e-05	1.14439	0.107759
PRDX6	44.8668	51.351	1.14452	0.00262277
FANCB	5.35184e-05	6.12616e-05	1.14468	0.0856806
NGF	5e-05	5.72347e-05	1.14469	0.0456098
STX7	1.31675	1.5075	1.14486	0.000120351
HIBCH	0.413288	0.473365	1.14536	0.774511
NCS1	5.39711e-05	6.18244e-05	1.14551	0.739759
OMD	5e-05	5.72758e-05	1.14552	0.0844112
WDR26	0.00436691	0.00500283	1.14562	0.0412338
P4HB	36.8255	42.1931	1.14576	4.30976e-05
SUPT4H1	5.35133e-05	6.13149e-05	1.14579	0.0240518
ATRN	5.42156e-05	6.21481e-05	1.14631	0.0929711
COMMD6	7.79097e-05	8.93215e-05	1.14647	0.311307
CCDC168	5.42506e-05	6.22008e-05	1.14655	0.0256499
COL17A1	0.0397621	0.0455926	1.14663	0.000102034
DZIP1	5e-05	5.73322e-05	1.14664	0.0735786
CTGF	5e-05	5.7333e-05	1.14666	0.0240104
NEFM	5.25294e-05	6.02334e-05	1.14666	0.145605
CLCA2	0.0583045	0.0668702	1.14691	0.000398375
CSRP1	3.10304	3.56024	1.14734	0.238459
ARHGAP21	5e-05	5.73706e-05	1.14741	0.0528093
MYL12B	5e-05	5.73916e-05	1.14783	0.0876059
PLK1S1	5.0951e-05	5.84853e-05	1.14787	0.0260402
JAK1	5.51068e-05	6.32607e-05	1.14797	0.0585916
RBX1	5.09386e-05	5.8492e-05	1.14828	0.152732
KIF15	6.88665e-05	7.90821e-05	1.14834	0.066239
CD248	5.33151e-05	6.12348e-05	1.14855	0.690885
CHMP1A	5.47595e-05	6.29043e-05	1.14874	0.0285647
CRIPT	5e-05	5.74437e-05	1.14887	0.0346779
GFPT2	5.09839e-05	5.85933e-05	1.14925	0.0421191
GNAI3	1.28894	1.48216	1.14991	1.23872e-06
LAMB2	0.683544	0.786073	1.15	0.0252272
BTBD7	5.16192e-05	5.93782e-05	1.15031	0.0147199
APPL1	0.199406	0.229402	1.15043	0.494373
EP300	5.08921e-05	5.85515e-05	1.1505	0.135627
ELOVL1	5.11811e-05	5.8884e-05	1.1505	0.27259
CFH	0.244425	0.28126	1.1507	7.42876e-07
TTC39B	0.000128175	0.000147497	1.15074	0.0953897
C16orf87	5e-05	5.75429e-05	1.15086	0.0476368
PDE5A	0.000107277	0.000123491	1.15115	0.819484
DHRS7B	0.0207512	0.0238892	1.15122	0.0100348
IQGAP1	12.357	14.2259	1.15123	5.37679e-07
DAAM2	6.20554e-05	7.14924e-05	1.15207	0.595641
DECR2	0.000112943	0.000130238	1.15313	0.0230191
APOE	0.647686	0.746894	1.15317	0.749201
ABCB1	5.81599e-05	6.70711e-05	1.15322	0.117356
STAG3	5e-05	5.76619e-05	1.15324	0.0514745
APOC2	0.016483	0.0190191	1.15386	0.441491
ASAP2	5.38162e-05	6.21042e-05	1.15401	0.460676
POLG	5.11774e-05	5.90666e-05	1.15415	0.207954
ANKMY2	5.09192e-05	5.8772e-05	1.15422	0.0124882
TUBB1	0.000612976	0.000707533	1.15426	0.0304894
CD82	0.110964	0.128106	1.15448	0.000112332
CCDC25	7.33487e-05	8.46856e-05	1.15456	0.179852
WNK1	0.00346248	0.00399843	1.15479	0.175386
MZT2A	5e-05	5.77476e-05	1.15495	0.0496722
SMAD3	5.12522e-05	5.91987e-05	1.15505	0.0475252
AGAP3	6.26163e-05	7.23274e-05	1.15509	0.296018
WDR16	5.08655e-05	5.87841e-05	1.15568	0.0210121
DHX34	5.12386e-05	5.92196e-05	1.15576	0.347928
TAF6L	5.11774e-05	5.91558e-05	1.1559	0.0644461
ICAM2	5e-05	5.7795e-05	1.1559	0.0598025
PLEKHH2	5e-05	5.77987e-05	1.15597	0.0198383
SYT17	5.09787e-05	5.89451e-05	1.15627	0.101515
ZBTB7B	5.11427e-05	5.91417e-05	1.15641	0.137787
NUMBL	5e-05	5.78209e-05	1.15642	0.195315
PITPNA	0.51568	0.59664	1.157	0.00269939
NAIP	5.16525e-05	5.97828e-05	1.1574	0.0177239
ATP5J2	5e-05	5.78743e-05	1.15749	0.0639449
C14orf2	5.13072e-05	5.94288e-05	1.15829	0.0517443
C19orf35	5e-05	5.79159e-05	1.15832	0.0282865
PDRG1	5e-05	5.79181e-05	1.15836	0.0561164
TMA7	8.31105e-05	9.62761e-05	1.15841	0.132176
SKIL	5e-05	5.79262e-05	1.15852	0.0406928
MTMR2	5.50764e-05	6.38158e-05	1.15868	0.165487
NCSTN	0.14305	0.165879	1.15959	6.58244e-08
ITPRIPL1	5e-05	5.79813e-05	1.15963	0.0318193
UBE2K	4.66685	5.41289	1.15986	6.17653e-05
ISG20L2	5e-05	5.80069e-05	1.16014	0.0372007
NBPF7	0.000396773	0.000460376	1.1603	0.0295919
HMCN1	5.31144e-05	6.1633e-05	1.16038	0.0258717
CENPN	5e-05	5.80571e-05	1.16114	0.0428634
KDM2B	5.25314e-05	6.10165e-05	1.16152	0.104912
LOC101060458	5.21729e-05	6.06323e-05	1.16214	0.0207477
COA4	5e-05	5.8116e-05	1.16232	0.0736064
GUK1	0.00322971	0.00375471	1.16255	0.539062
MMP7	5.09922e-05	5.92923e-05	1.16277	0.0195753
LARP1B	5e-05	5.81702e-05	1.1634	0.0378051
ID1	5e-05	5.82065e-05	1.16413	0.0867007
NIPAL4	5e-05	5.82375e-05	1.16475	0.0374987
C4BPA	2.28347	2.66017	1.16497	0.885413
PLEKHH1	5.16834e-05	6.02177e-05	1.16513	0.152629
BCAR3	5.08275e-05	5.9221e-05	1.16514	0.0132829
TPM1	77.3734	90.1542	1.16518	0.0469216
LOXL4	5.127e-05	5.9755e-05	1.1655	0.0994356
CDKN2AIPNL	5e-05	5.8275e-05	1.1655	0.131413
SEPSECS	5e-05	5.83296e-05	1.16659	0.165591
PLS3	11.9511	13.9436	1.16672	1.36817e-07
C1RL	5.09625e-05	5.94603e-05	1.16675	0.0193825
KPRP	5e-05	5.83511e-05	1.16702	0.0453339
ATP6V0D1	0.158616	0.185175	1.16744	0.616152
SYNC	5.34785e-05	6.24431e-05	1.16763	0.145298
PRODH	5e-05	5.83892e-05	1.16778	0.0255448
COLEC10	5.12077e-05	5.9802e-05	1.16783	0.124293
TMEM62	5e-05	5.84212e-05	1.16842	0.0529954
SMG5	5.51994e-05	6.45097e-05	1.16867	0.626322
ACTN4	37.4398	43.7625	1.16888	2.88696e-10
SPRR1B	5e-05	5.84519e-05	1.16904	0.00816476
OXLD1	5.1187e-05	5.98534e-05	1.16931	0.054813
RNF24	5e-05	5.84656e-05	1.16931	0.295935
DDX31	5.46754e-05	6.39379e-05	1.16941	0.0575724
PNP	6.13376	7.17543	1.16982	2.31054e-06
ARMCX2	5e-05	5.84975e-05	1.16995	0.0409154
TK2	5e-05	5.85084e-05	1.17017	0.0130162
NCOA6	5.30271e-05	6.20564e-05	1.17028	0.100365
CWC25	5.13248e-05	6.00651e-05	1.17029	0.0548622
AGO3	5e-05	5.85339e-05	1.17068	0.0387343
COL11A1	5.72925e-05	6.70815e-05	1.17086	0.256774
UNC13D	0.00353472	0.00413932	1.17105	0.051299
TMEM33	0.771144	0.903221	1.17127	8.97105e-12
KIAA1715	0.047107	0.0551904	1.1716	3.7399e-11
AGPAT3	7.28379e-05	8.53554e-05	1.17185	0.167487
IREB2	5.09745e-05	5.97394e-05	1.17195	0.0439055
ZNF800	5.38386e-05	6.30977e-05	1.17198	0.0191997
DDX19A	5e-05	5.86031e-05	1.17206	0.0312231
SLC12A7	5.29778e-05	6.21109e-05	1.17239	0.189737
SNRPF	5e-05	5.86709e-05	1.17342	0.0532592
ARID3A	5e-05	5.86838e-05	1.17368	0.0337206
TMBIM6	0.00348768	0.00409364	1.17374	0.0401361
TYK2	5.18775e-05	6.09005e-05	1.17393	0.0766894
PACS2	5.58596e-05	6.55756e-05	1.17394	0.32624
SUPT7L	5e-05	5.87069e-05	1.17414	0.0123658
TMEM14C	6.30045e-05	7.3992e-05	1.17439	0.549516
KAZN	5.24617e-05	6.16287e-05	1.17474	0.00971562
PTGDS	6.07784e-05	7.13992e-05	1.17475	0.34827
SPECC1	5.1521e-05	6.05295e-05	1.17485	0.0155933
SLC36A1	5e-05	5.87444e-05	1.17489	0.0130338
MAF1	5e-05	5.87476e-05	1.17495	0.0652832
SPTY2D1	5.23025e-05	6.14725e-05	1.17532	0.0429695
RRP7A	5.10601e-05	6.00253e-05	1.17558	0.0665935
XYLB	5.09332e-05	5.98779e-05	1.17562	0.0138193
PXK	5.54809e-05	6.52295e-05	1.17571	0.102726
GNE	8.97517e-05	0.000105531	1.17582	0.0868492
SLC12A4	5.07519e-05	5.96832e-05	1.17598	0.0154047
PPP1R15A	5e-05	5.88017e-05	1.17603	0.0250537
MARK2	0.00181441	0.0021343	1.17631	0.485386
AKR1C1	5e-05	5.886e-05	1.1772	0.215046
PHKA1	6.11354e-05	7.19715e-05	1.17725	0.127526
TTC4	5.4042e-05	6.36687e-05	1.17813	0.020642
RGS14	5.12741e-05	6.04079e-05	1.17814	0.133296
CAND2	6.39643e-05	7.54065e-05	1.17888	0.224027
FCN2	6.10503e-05	7.19887e-05	1.17917	0.121949
DLG3	6.99137e-05	8.24502e-05	1.17931	0.11922
LOC101060718	5e-05	5.8966e-05	1.17932	0.0230313
AADAC	5.83541e-05	6.88285e-05	1.1795	0.378357
SREBF2	5e-05	5.89776e-05	1.17955	0.0277376
TARSL2	5.10458e-05	6.02229e-05	1.17978	0.0803077
PDHA2	5.53168e-05	6.52739e-05	1.18	0.317604
GHITM	5e-05	5.90376e-05	1.18075	0.0296185
NHS	5e-05	5.90577e-05	1.18115	0.0502085
C4orf3	5e-05	5.90665e-05	1.18133	0.038475
FNDC3B	5.08163e-05	6.0033e-05	1.18137	0.0284163
EYA3	5.18176e-05	6.12715e-05	1.18244	0.0249504
SLFN11	5.16956e-05	6.11657e-05	1.18319	0.0165451
SH3BGRL3	9.26156	10.9597	1.18336	0.00477428
PRG4	0.00011082	0.000131165	1.18358	0.0736176
SNX16	5.85826e-05	6.93519e-05	1.18383	0.0872811
CCDC101	5e-05	5.92114e-05	1.18423	0.0507616
KCNK18	5.47007e-05	6.47871e-05	1.18439	0.045792
DEPDC5	5.19022e-05	6.14744e-05	1.18443	0.206605
TRAPPC1	6.11872e-05	7.25133e-05	1.18511	0.250018
PPP2R4	1.99603	2.36602	1.18536	0.0369503
MTCH2	0.580591	0.688339	1.18558	1.08749e-05
PRDM7	5.2627e-05	6.23944e-05	1.1856	0.489592
DLGAP5	5.58309e-05	6.62053e-05	1.18582	0.923869
TRAF2	5.21272e-05	6.1824e-05	1.18602	0.0677818
MID1	5.45517e-05	6.47151e-05	1.18631	0.287666
PCF11	5.5516e-05	6.58687e-05	1.18648	0.317919
WDR47	9.35873e-05	0.000111049	1.18658	0.0113388
RPL29	0.0263315	0.031248	1.18672	0.349521
CYTH4	5.33277e-05	6.32904e-05	1.18682	0.0539782
KLHDC2	5.28768e-05	6.27668e-05	1.18704	0.0782631
DCXR	0.351207	0.417035	1.18743	2.06623e-05
RPS9	8.48483	10.0785	1.18783	0.00602343
MRPS18C	5.18211e-05	6.15593e-05	1.18792	0.0413369
TRAPPC9	5.18172e-05	6.15614e-05	1.18805	0.231993
MMS22L	5.46002e-05	6.48807e-05	1.18829	0.274508
PRKAR2A	0.583675	0.693689	1.18849	0.000663371
PDZK1IP1	5.16583e-05	6.14005e-05	1.18859	0.0100698
RBFOX2	5e-05	5.94339e-05	1.18868	0.069743
AADACL2	5e-05	5.94367e-05	1.18873	0.070564
CECR1	5e-05	5.94846e-05	1.18969	0.051822
ABHD14B	2.12863	2.53381	1.19035	1.2673e-07
ABI2	5e-05	5.95177e-05	1.19035	0.0488434
ATP5L	8.33919	9.92973	1.19073	2.28893e-10
STRA6	5e-05	5.95642e-05	1.19128	0.0479633
ECT2L	6.26767e-05	7.46699e-05	1.19135	0.756223
ND6	0.000146855	0.000174974	1.19147	0.861954
RARRES2	6.49496e-05	7.7432e-05	1.19219	0.0589651
SELP	5.09531e-05	6.07913e-05	1.19308	0.0293527
TNKS1BP1	0.8044	0.960958	1.19463	1.79789e-05
GNAS	0.484984	0.579438	1.19476	6.59094e-16
ATP6V0A1	0.00890051	0.0106381	1.19522	0.0212725
GNB4	5e-05	5.97862e-05	1.19572	0.194838
CDC42BPA	5.42058e-05	6.48445e-05	1.19627	0.0291131
SCML2	5e-05	5.98154e-05	1.19631	0.0177291
BRPF1	5.05561e-05	6.04979e-05	1.19665	0.37718
FOSB	5.09565e-05	6.09792e-05	1.19669	0.0220475
TNIP1	5.68638e-05	6.80504e-05	1.19673	0.0108584
IDS	5e-05	5.98546e-05	1.19709	0.0244196
COL6A1	44.4193	53.1872	1.19739	0.000497345
HPX	9.42692	11.2928	1.19793	0.000152053
WDR48	6.16099e-05	7.38202e-05	1.19819	0.692886
ATP5E	6.78312e-05	8.13279e-05	1.19897	0.489816
SYNE1	9.94888e-05	0.000119294	1.19907	0.0711491
FRMPD3	5e-05	5.99548e-05	1.1991	0.0133443
DCTN3	8.71998e-05	0.000104567	1.19916	0.294927
METAP1	0.132095	0.158414	1.19924	7.83961e-05
DNAJB5	5.32305e-05	6.38536e-05	1.19957	0.0378966
ZNF428	5e-05	5.99976e-05	1.19995	0.0579821
TCAIM	5.09949e-05	6.12331e-05	1.20077	0.0108316
RBM23	5e-05	6.0044e-05	1.20088	0.0203276
HERC2	5.23181e-05	6.28544e-05	1.20139	0.091803
PIAS2	5e-05	6.00991e-05	1.20198	0.0049821
MORF4L2	5.35545e-05	6.43731e-05	1.20201	0.79307
LRRC25	5e-05	6.01112e-05	1.20222	0.0404836
BCAS3	5.91592e-05	7.11379e-05	1.20248	0.094737
ROS1	6.40968e-05	7.70955e-05	1.2028	0.395314
NR2F6	5.33486e-05	6.41712e-05	1.20287	0.0135254
GSN	8.45356	10.1701	1.20306	2.10391e-07
COX6B1	5.54002e-05	6.66606e-05	1.20326	0.0182217
CRCP	5e-05	6.01799e-05	1.2036	0.0199636
FBN2	5e-05	6.01897e-05	1.20379	0.0582388
NME7	5e-05	6.02069e-05	1.20414	0.0520019
DNASE2	5.12139e-05	6.17153e-05	1.20505	0.231162
PPP2CA	5e-05	6.03077e-05	1.20615	0.0466153
PCP4L1	5.07417e-05	6.12245e-05	1.20659	0.0159098
KNOP1	5.08667e-05	6.13811e-05	1.2067	0.0125588
SPINT2	5.30482e-05	6.40136e-05	1.20671	0.046472
TRPV2	5e-05	6.03579e-05	1.20716	0.0325873
LDHA	20.7031	24.9942	1.20727	7.9366e-05
RAB2A	5.62871	6.79669	1.2075	4.14739e-06
RFC3	6.11677e-05	7.38658e-05	1.2076	0.0790159
C17orf77	5e-05	6.03986e-05	1.20797	0.021154
RPS4Y2	0.000142702	0.000172384	1.208	0.620299
PRR11	6.33624e-05	7.65673e-05	1.2084	0.166969
CLIC1	24.0065	29.015	1.20863	4.39056e-06
PTPN7	5.1091e-05	6.17853e-05	1.20932	0.00965686
RWDD4	5.08078e-05	6.14639e-05	1.20973	0.0179205
CCDC43	9.46007e-05	0.000114447	1.20979	0.766306
GPC6	5e-05	6.05148e-05	1.2103	0.0507256
PIK3CA	5.07662e-05	6.14761e-05	1.21096	0.0399937
VPS33B	0.000491597	0.00059534	1.21103	0.014487
PSMB6	0.00566959	0.00686739	1.21127	0.469414
ALB	1345.84	1630.25	1.21132	2.05447e-07
SEC24C	0.677956	0.821383	1.21156	0.679733
TCN1	5.61746e-05	6.80669e-05	1.2117	0.280596
RPS16	17.3107	20.9809	1.21202	0.000164183
RAP2A	6.65294e-05	8.06487e-05	1.21223	0.0419688
CBX6	5.20265e-05	6.30909e-05	1.21267	0.00947418
DPH7	5.0797e-05	6.16164e-05	1.21299	0.016154
ERLIN1	0.00109144	0.00132395	1.21303	0.0186255
LTV1	5e-05	6.06592e-05	1.21318	0.0359648
FUNDC1	6.06134e-05	7.35759e-05	1.21385	0.351749
SPG11	5.56202e-05	6.7524e-05	1.21402	0.0265633
RAB3B	5e-05	6.07041e-05	1.21408	0.018479
MRPL30	5e-05	6.07054e-05	1.21411	0.0941122
COX2	35.7173	43.3883	1.21477	2.89563e-09
MAPRE3	5.12576e-05	6.22867e-05	1.21517	0.0413241
YWHAB	15.6096	18.9742	1.21554	0.00206743
MTSS1L	5.16425e-05	6.27971e-05	1.216	0.0289883
TM9SF3	0.000210142	0.000255579	1.21622	0.389764
NAT2	5.13905e-05	6.25061e-05	1.2163	0.134779
RRN3	5e-05	6.08266e-05	1.21653	0.0105228
EPHX1	2.7962	3.40446	1.21753	1.11822e-06
ARHGEF11	5.3221e-05	6.4806e-05	1.21768	0.18036
FAM175B	6.73007e-05	8.20122e-05	1.21859	0.0139601
SENP2	5.1283e-05	6.24977e-05	1.21868	0.0858768
ACTA2	5e-05	6.09422e-05	1.21884	0.143096
RBFA	5.51355e-05	6.72029e-05	1.21887	0.0295805
SETDB1	5e-05	6.09612e-05	1.21922	0.0120555
GNB2L1	16.7908	20.473	1.2193	3.64859e-08
HECA	5.18435e-05	6.32149e-05	1.21934	0.00735061
FAT2	0.00044293	0.0005402	1.21961	0.0671281
NFKBIB	5.37262e-05	6.55296e-05	1.2197	0.00764871
CAB39L	0.299359	0.365225	1.22002	0.185222
ALDH3B1	5.74683e-05	7.01828e-05	1.22124	0.818218
NISCH	5.80433e-05	7.09022e-05	1.22154	0.0447844
COA6	6.74308e-05	8.23934e-05	1.2219	0.0456576
NMT2	5.11802e-05	6.25518e-05	1.22219	0.0624767
TXNL1	1.89003	2.31061	1.22252	0.000173949
SEC14L6	6.74333e-05	8.24786e-05	1.22311	0.655087
EGLN1	5.63151e-05	6.888e-05	1.22312	0.0750346
SPAG1	5.10199e-05	6.24328e-05	1.22369	0.0365099
COL1A1	15.6683	19.1737	1.22373	0.61025
GLOD4	1.6696	2.0442	1.22437	4.74294e-10
THADA	5.18513e-05	6.34877e-05	1.22442	0.160228
CHKB	6.39832e-05	7.83616e-05	1.22472	0.151408
OXSR1	0.844611	1.03453	1.22487	3.40254e-09
CLEC2B	5.11264e-05	6.26272e-05	1.22495	0.0335523
DOLPP1	6.44804e-05	7.90153e-05	1.22541	0.0315851
CIC	5e-05	6.12786e-05	1.22557	0.138919
CNTRL	5.08147e-05	6.2277e-05	1.22557	0.0849453
ATP5D	1.17313	1.43785	1.22565	1.0482e-07
ABCB8	6.61947e-05	8.11463e-05	1.22587	0.484127
NEO1	5e-05	6.12986e-05	1.22597	0.0129311
TRAPPC13	5.09468e-05	6.2488e-05	1.22654	0.0164219
POLE	6.22932e-05	7.64161e-05	1.22672	0.0620795
PRKAR1B	6.24201e-05	7.65731e-05	1.22674	0.0153555
YTHDF1	5e-05	6.1347e-05	1.22694	0.0108744
MTPAP	5.33331e-05	6.54431e-05	1.22706	0.00294876
SRPX2	5.30671e-05	6.51443e-05	1.22758	0.0143606
MAGOH	5e-05	6.13813e-05	1.22763	0.0310946
IL12RB2	5e-05	6.13874e-05	1.22775	0.0206237
MADCAM1	5.10948e-05	6.27343e-05	1.2278	0.0775141
SLC30A7	5.49115e-05	6.74267e-05	1.22792	0.0104694
DEPDC1	5e-05	6.14021e-05	1.22804	0.0163537
PRELP	4.23086	5.19591	1.2281	0.0126393
ZNHIT6	5.31005e-05	6.52555e-05	1.22891	0.10343
SFT2D3	5.74956e-05	7.06735e-05	1.2292	0.0867745
CAPG	14.7256	18.1018	1.22928	6.10926e-07
RABIF	0.000134452	0.000165293	1.22938	0.462329
AKAP11	5.12751e-05	6.30465e-05	1.22957	0.0213525
HTRA3	5e-05	6.14825e-05	1.22965	0.0188985
CNNM4	5.35573e-05	6.58569e-05	1.22965	0.0563967
CSNK1A1	0.135207	0.166341	1.23028	0.00743815
MAGOHB	5e-05	6.15141e-05	1.23028	0.0660264
ATG2B	5.1154e-05	6.29421e-05	1.23045	0.162322
APEX2	5.94977e-05	7.32706e-05	1.23149	0.0797742
GOLM1	5.75034e-05	7.08177e-05	1.23154	0.303001
MRPL42	5.44059e-05	6.70075e-05	1.23162	0.0297986
NDUFS5	0.000210365	0.00025911	1.23172	0.141483
ENSA	3.26753	4.02739	1.23255	3.99059e-15
SCRIB	0.23095	0.284724	1.23284	0.193571
CLINT1	0.0319029	0.0393385	1.23307	0.567117
DIRC2	5.6155e-05	6.93049e-05	1.23417	0.184652
CERCAM	5e-05	6.17229e-05	1.23446	0.0160575
TMEM43	2.82822	3.4916	1.23456	5.74517e-09
PHF3	5.06459e-05	6.25382e-05	1.23481	0.0635517
MFNG	5.22211e-05	6.44898e-05	1.23494	0.00676441
ARHGAP18	5.47737e-05	6.76942e-05	1.23589	0.00519112
BCAT1	6.12563e-05	7.57356e-05	1.23637	0.0679795
COL2A1	6.46743e-05	7.99652e-05	1.23643	0.26697
ESRP1	0.338689	0.41948	1.23854	0.425587
ACN9	5e-05	6.19305e-05	1.23861	0.100752
PRDX2	36.2	44.8554	1.2391	0.015496
NDUFAF2	8.34308e-05	0.000103427	1.23967	0.594377
FCER1G	5.20755e-05	6.4569e-05	1.23991	0.0153119
NFATC3	5.16948e-05	6.41284e-05	1.24052	0.136931
RAB5A	2.07676	2.57793	1.24132	1.59211e-07
PFKL	1.75381	2.17732	1.24147	2.02029e-14
SPATS2	5.08827e-05	6.31724e-05	1.24153	0.00329697
PCDHGB4	5.23447e-05	6.50044e-05	1.24185	0.0217237
STXBP2	0.0271075	0.0336738	1.24223	0.0121599
MSRA	0.00195724	0.00243551	1.24436	0.00265815
CXorf38	0.00010166	0.000126502	1.24437	0.00301827
CTNNA2	0.000246168	0.00030633	1.24439	0.763919
GSDMA	5.53601e-05	6.89496e-05	1.24547	0.136782
CCDC137	5.26249e-05	6.5548e-05	1.24557	0.274619
PIWIL1	5e-05	6.22838e-05	1.24568	0.0379408
PPP1R2	6.22497e-05	7.7554e-05	1.24585	0.310482
CARD6	5.28108e-05	6.58479e-05	1.24686	0.0235704
CEL	5.32409e-05	6.63858e-05	1.24689	0.00565519
DIAPH1	0.355707	0.443567	1.247	0.000472185
VPS35	2.18256	2.722	1.24716	2.2613e-08
TMCC2	5e-05	6.23903e-05	1.24781	0.00330994
PTPN13	5.8763e-05	7.33342e-05	1.24796	0.0942509
SCRN3	0.000134246	0.000167557	1.24813	0.103572
GOT1	1.87215	2.33722	1.24842	0.0110636
CD19	5e-05	6.24312e-05	1.24862	0.0273591
ACTR3B	9.23652e-05	0.000115393	1.24931	0.0459497
TRUB1	5e-05	6.24671e-05	1.24934	0.0349168
SULF2	5e-05	6.25438e-05	1.25088	0.0165815
C9orf40	5e-05	6.25562e-05	1.25112	0.028512
TUT1	5.18886e-05	6.49212e-05	1.25116	0.00368068
HIST1H1D	5e-05	6.25942e-05	1.25188	0.0924923
FER	5.13159e-05	6.4245e-05	1.25195	0.0252187
RPL13	8.2599	10.346	1.25255	0.00220898
MGP	5e-05	6.26469e-05	1.25294	0.018018
SULF1	5.11932e-05	6.4181e-05	1.2537	0.0191393
STAMBP	0.000736646	0.00092391	1.25421	0.00404517
ATF6	5e-05	6.27199e-05	1.2544	0.0629352
CLN5	5.07729e-05	6.36942e-05	1.25449	0.135063
CARD17	5.34266e-05	6.70303e-05	1.25463	0.206757
RMDN2	5e-05	6.27563e-05	1.25513	0.0430103
KLHL42	6.79721e-05	8.53264e-05	1.25531	0.14099
TIMM10	5.09579e-05	6.3983e-05	1.25561	0.00274951
NT5C2	0.258116	0.324147	1.25582	0.000614368
FGR	5.24358e-05	6.58501e-05	1.25582	0.157642
ACBD5	5.78144e-05	7.26112e-05	1.25594	0.115761
HSPA4L	0.999738	1.25648	1.25681	8.22725e-06
C19orf33	5e-05	6.28429e-05	1.25686	0.0254586
FAM213A	2.76482	3.47774	1.25786	7.10261e-05
BCL11A	5.10248e-05	6.41847e-05	1.25791	0.0106634
ENDOG	0.000116741	0.000146875	1.25813	0.0409768
RNF7	5e-05	6.2928e-05	1.25856	0.0513311
EXOC3	0.0588183	0.0740286	1.2586	0.0497395
MTMR6	5.76544e-05	7.26068e-05	1.25935	0.756341
FLNB	3.76262	4.73888	1.25946	8.97679e-11
PIK3C2A	5.36539e-05	6.75783e-05	1.25952	0.0168671
SH2D1A	5.33999e-05	6.72714e-05	1.25977	0.0100933
CEP250	5.65566e-05	7.12566e-05	1.25992	0.0454854
CAPN2	0.988702	1.24586	1.2601	5.95406e-08
TMEM63B	5.72342e-05	7.21225e-05	1.26013	0.194652
POU2F1	5.34259e-05	6.73367e-05	1.26038	0.0309509
SUZ12	6.61054e-05	8.33496e-05	1.26086	0.131852
HLTF	5e-05	6.30767e-05	1.26153	0.00359424
SARS	2.23042	2.81447	1.26186	2.81702e-08
NXT2	5e-05	6.30939e-05	1.26188	0.00945145
MAP4K4	0.000508197	0.000641299	1.26191	0.1156
SH2D3A	7.35335e-05	9.28102e-05	1.26215	0.0241811
ARID1B	5.09954e-05	6.43917e-05	1.2627	0.00397994
DERL2	5e-05	6.3175e-05	1.2635	0.124473
DYNLL1	5e-05	6.31763e-05	1.26353	0.0200037
TXLNG	5e-05	6.31859e-05	1.26372	0.0095635
MPZL1	7.40736e-05	9.36158e-05	1.26382	0.011732
APOH	0.000107482	0.000135842	1.26386	0.00832532
IVNS1ABP	5e-05	6.31958e-05	1.26392	0.0103962
LIMK2	5.67121e-05	7.16804e-05	1.26393	0.0130947
SHROOM2	5.8933e-05	7.44884e-05	1.26395	0.0193598
TMPRSS4	6.58927e-05	8.33176e-05	1.26444	0.981596
SERPINA3	6.12418	7.74851	1.26523	0.0229592
DIS3L	5e-05	6.3292e-05	1.26584	0.0695829
JARID2	5e-05	6.33153e-05	1.26631	0.00668602
TBR1	8.33866e-05	0.00010562	1.26663	0.60675
STT3B	0.103205	0.130743	1.26683	0.000999294
VNN1	5.46719e-05	6.92745e-05	1.2671	0.185387
HDAC4	5.2729e-05	6.68162e-05	1.26716	0.00525411
VPS28	7.76198e-05	9.83905e-05	1.2676	0.0150159
FCER2	5.2316e-05	6.63233e-05	1.26774	0.0800916
PALLD	0.324322	0.411232	1.26798	5.14692e-06
SPTAN1	3.94233	5.0002	1.26834	1.23218e-22
AKR1C4	5.32391e-05	6.7526e-05	1.26835	0.0288571
LRCH1	5.11781e-05	6.49395e-05	1.26889	0.0228805
COL1A2	5.15995	6.55096	1.26958	0.770415
UBE2C	5.48836e-05	6.96859e-05	1.2697	0.157365
AFAP1	5.21501e-05	6.62387e-05	1.27015	0.0131816
VARS2	5.37096e-05	6.82414e-05	1.27056	0.036925
RELT	5.1065e-05	6.48992e-05	1.27091	0.00548539
WNT4	5e-05	6.3546e-05	1.27092	0.00862855
ARFIP2	0.00154576	0.00196459	1.27096	0.0918311
SLC25A22	5e-05	6.35669e-05	1.27134	0.0735587
VTN	15.4555	19.655	1.27172	0.00272803
FGD3	5.8035e-05	7.38067e-05	1.27176	0.00226142
KPNA6	0.199224	0.253492	1.2724	2.83902e-08
MTMR1	8.96732e-05	0.000114107	1.27247	0.186429
CRYM	5.09938e-05	6.48941e-05	1.27259	0.0318453
PPIP5K2	5.6428e-05	7.18108e-05	1.27261	0.0017497
RUFY1	0.0258595	0.032914	1.2728	0.0858724
GLMN	9.46734e-05	0.000120504	1.27284	0.00855995
C12orf75	5.1069e-05	6.50282e-05	1.27334	0.00429661
PARD6G	0.00021438	0.000273013	1.2735	0.00629453
HMG20B	5e-05	6.36869e-05	1.27374	0.0241247
SYDE1	5.13454e-05	6.5404e-05	1.27381	0.0306282
UGDH	2.26157	2.88089	1.27384	2.44465e-07
UBE2B	5e-05	6.37109e-05	1.27422	0.0482374
GNB2	5.12916e-05	6.53846e-05	1.27476	0.0107462
NDUFA2	1.16735	1.48878	1.27535	2.57957e-10
GSTP1	452.328	576.994	1.27561	1.26777e-09
SHB	5.22179e-05	6.66627e-05	1.27663	0.0437732
MPP6	5.10608e-05	6.51868e-05	1.27665	0.0845481
BRD1	5.14711e-05	6.57693e-05	1.27779	0.00163056
COL6A2	59.7682	76.3806	1.27795	1.06953e-05
RPS15A	20.8228	26.6107	1.27796	4.09812e-09
GNB1	5e-05	6.3912e-05	1.27824	0.0105547
EHHADH	0.08873	0.113452	1.27862	6.59896e-08
DCAF12L2	5e-05	6.39423e-05	1.27885	0.0472348
C10orf35	5.14243e-05	6.57883e-05	1.27932	0.0470962
MAPK9	5.19535e-05	6.64685e-05	1.27938	0.06547
DDI2	2.08654	2.66953	1.27941	7.27056e-07
A2M	5.622	7.19958	1.28061	5.01219e-06
NSUN4	5e-05	6.40437e-05	1.28087	0.0469312
CLDN7	0.000242521	0.000310659	1.28096	0.0138917
VIMP	5.10387e-05	6.54079e-05	1.28154	0.026331
FBXO45	5.32025e-05	6.82187e-05	1.28224	0.00752468
ICMT	7.23226e-05	9.27542e-05	1.28251	0.0192694
SCAI	5e-05	6.41309e-05	1.28262	0.00913042
SERAC1	5e-05	6.41547e-05	1.28309	0.00301287
PRMT7	5.10717e-05	6.55329e-05	1.28316	0.00326334
GSTK1	5.38404	6.91122	1.28365	1.35657e-05
RNPEP	2.40007	3.08203	1.28414	1.29708e-06
NDNL2	5.35293e-05	6.87431e-05	1.28421	0.525729
CSK	0.253754	0.325956	1.28454	2.68694e-06
FPR1	5e-05	6.42434e-05	1.28487	0.0490988
NAMPT	6.68918	8.59486	1.28489	6.70746e-07
MT2A	5e-05	6.42545e-05	1.28509	0.0200985
YWHAG	9.56783	12.2982	1.28537	0.0104939
SERPINB9	1.16774	1.50141	1.28574	0.0819255
CKAP4	8.0007	10.2963	1.28693	6.04513e-11
RBM6	5.14748e-05	6.62712e-05	1.28745	0.0128126
CHL1	9.84453e-05	0.000126826	1.28829	0.00922879
EIF2AK4	5.44262e-05	7.01196e-05	1.28834	0.00674621
PITX1	9.78894e-05	0.000126183	1.28904	0.157783
GMPR	0.000181211	0.000233595	1.28908	0.568953
DCTN2	3.76109	4.85002	1.28952	7.59682e-11
TOP3A	5e-05	6.44791e-05	1.28958	0.0122813
DENND4C	7.39032e-05	9.53069e-05	1.28962	0.0160473
UBE2G2	6.23154e-05	8.03639e-05	1.28963	0.477003
PPP1R11	5.08619e-05	6.56093e-05	1.28995	0.0010481
ESAM	5.64428e-05	7.28314e-05	1.29036	0.0321675
MYL1	5e-05	6.45307e-05	1.29061	0.00951198
PLEKHG4	5e-05	6.45334e-05	1.29067	0.00296136
MGAT1	0.0894924	0.115506	1.29068	0.00188723
OPLAH	0.242167	0.312721	1.29135	0.0387384
COMMD1	5.60485e-05	7.23849e-05	1.29147	0.0298086
CGREF1	5.19555e-05	6.71215e-05	1.2919	0.0176462
HEATR6	5.22468e-05	6.75032e-05	1.29201	0.0566271
ITIH1	2.04342	2.64039	1.29214	0.000156049
CLEC3B	0.76511	0.988819	1.29239	5.30893e-08
TUBA8	9.00036e-05	0.000116335	1.29256	0.00876545
SLBP	5.1068e-05	6.60331e-05	1.29304	0.0348315
UGP2	3.78657	4.8973	1.29333	9.33201e-11
COL27A1	9.37798e-05	0.000121307	1.29353	0.0100247
SIL1	5.28752e-05	6.84072e-05	1.29375	0.0214711
FGD2	5.68703e-05	7.3591e-05	1.29401	0.137769
ASXL2	5e-05	6.47196e-05	1.29439	9.07667e-05
CARHSP1	5.65667	7.32327	1.29463	5.96172e-05
NRP2	5.57478e-05	7.21875e-05	1.29489	0.429026
LEPREL4	5.14831e-05	6.66697e-05	1.29498	0.0529543
CLCN7	5.21386e-05	6.75197e-05	1.29501	0.00296729
RAB9B	0.00237	0.00306921	1.29503	0.198557
KLRG2	5.1327e-05	6.64754e-05	1.29514	0.03335
CEP44	5e-05	6.47576e-05	1.29515	0.033061
GPX3	2.14941	2.78408	1.29528	2.2606e-05
GNG4	5e-05	6.47666e-05	1.29533	0.19483
SDC4	0.00282257	0.00365893	1.29631	0.00224189
PPP2R1A	4.22559	5.48102	1.2971	1.9198e-09
PPTC7	5e-05	6.48879e-05	1.29776	0.0372283
UNC45A	0.807722	1.04849	1.29808	4.13946e-08
C11orf84	5e-05	6.49047e-05	1.29809	0.0304838
CALB2	5.51586e-05	7.16481e-05	1.29895	0.209967
NEDD1	5e-05	6.49505e-05	1.29901	0.000711791
LARS	0.867069	1.12633	1.29901	8.5871e-06
[truncated: 4,688 more rows]
